# Supplementary material for: Comparison of Trace Organic Chemical Removal Efficiencies between Aerobic and Anaerobic Membrane Bioreactors Treating Municipal Wastewater
Source: PubMed Central journal article supplement — ACS ES T Water. 2024 Mar 18;4(4):1381–92. doi: 10.1021/acsestwater.3c00542 (PMC11019542; doi:10.1021/acsestwater.3c00542), 2024-03-18

**Mass spectra of the non-tentatively identifiable compounds newly transformed by both the aerobic membrane bioreactor and anaerobic membrane bioreactor.**

**Comparison of Trace Organic Chemical Removal Efficiencies between Aerobic and Anaerobic Membrane Bioreactors Treating Municipal Wastewater**

Jade L. Johnson<sup>†‡</sup>, Nathan G. Dodder<sup>†‡</sup>, Natalie Mladenov<sup>§\*</sup>, Lauren Steinberg<sup>§↓</sup>, William Richardot<sup>‡</sup>, Eunha Hoh<sup>†\*</sup>

<sup>†</sup> School of Public Health, San Diego State University, San Diego, California 92182 United States; <sup>‡</sup> San Diego State University Research Foundation, San Diego, California 92182 United States; <sup>§</sup> Department of Civil, Construction, and Environmental Engineering, San Diego State University, San Diego, California 92182, United States.

\* Corresponding author email: Eunha Hoh ([ehoh@sdsu.edu](mailto:ehoh@sdsu.edu)) and Natalie Mladenov ([nmladenov@sdsu.edu](mailto:nmladenov@sdsu.edu))

Prepared: 2023-01-27

1st Dimension R.T. = 696.876  
2nd Dimension R.T. = 1.122  
Quant Mass(es) = 70  
S/N = 1015.2  
Area = 240696  
Height = 26690  
Similarity = 836

Peak True - sample "AnMbr B (20191120):1", peak 478, at 696.876 , 1.122 sec , sec (Spec # 33030)

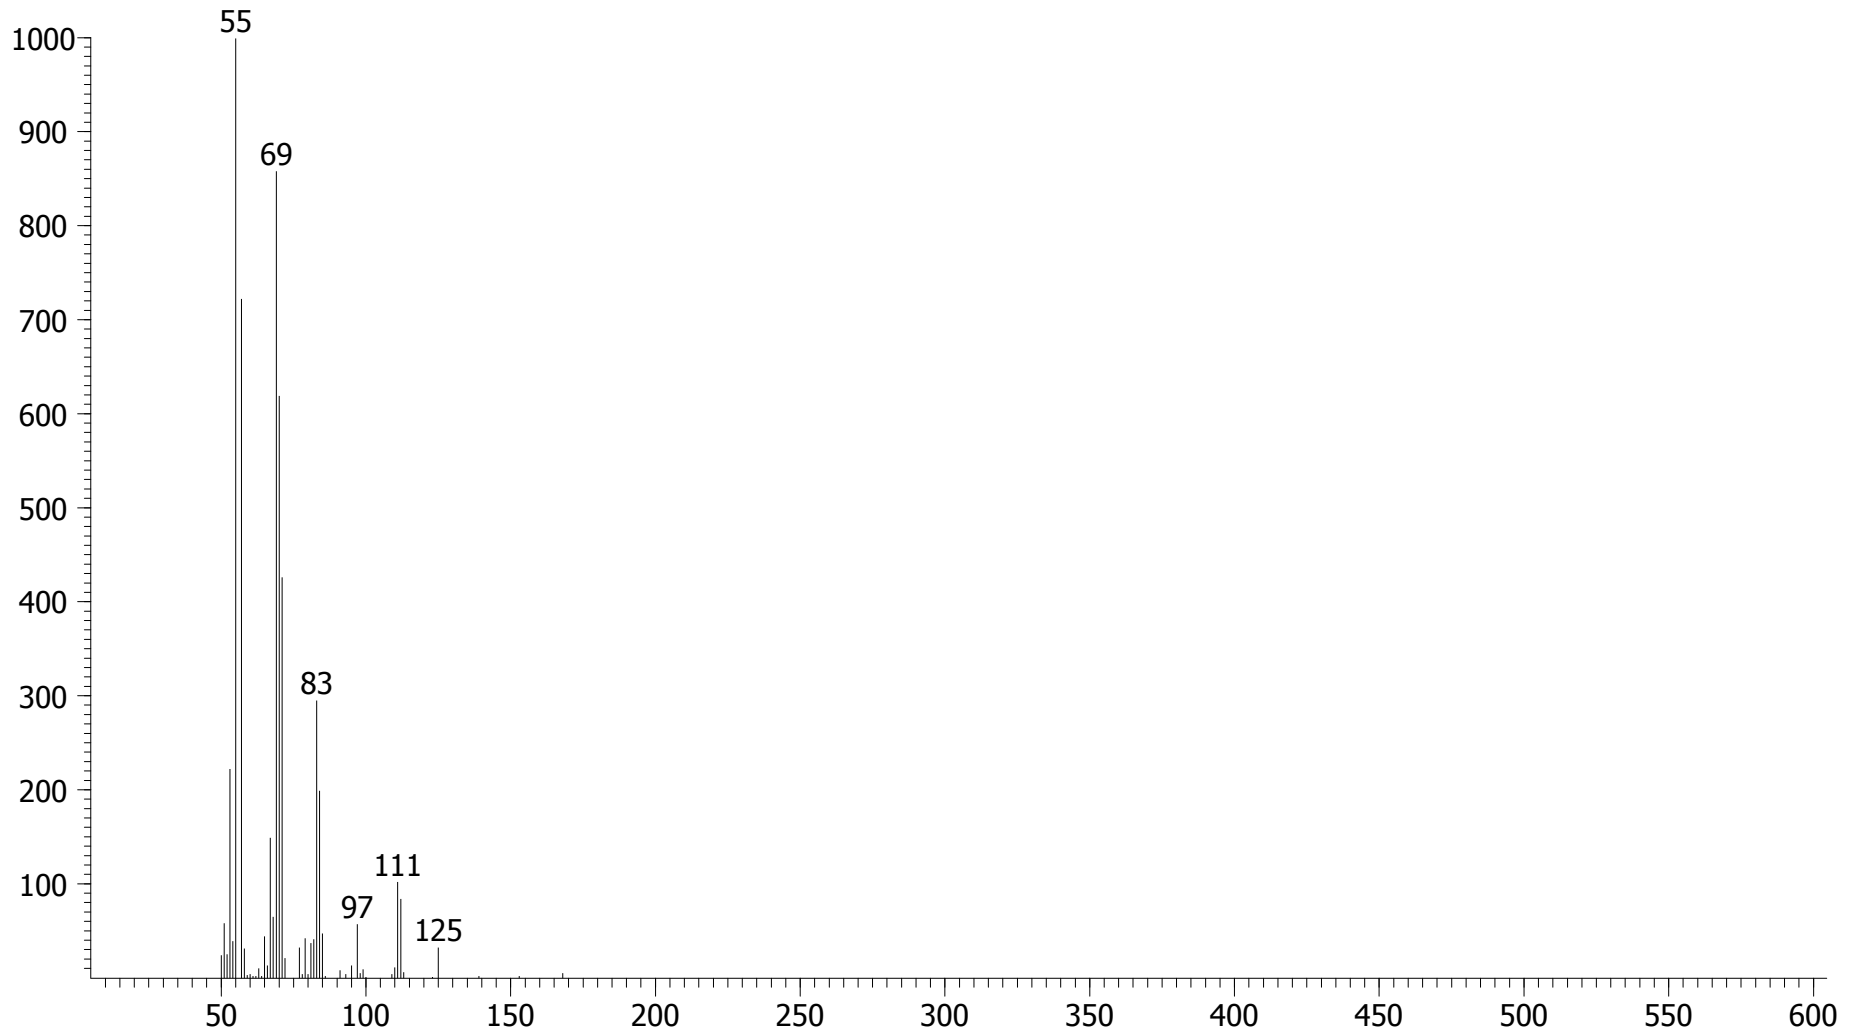

1st Dimension R.T. = 787.824  
2nd Dimension R.T. = 1.307  
Quant Mass(es) = 70  
S/N = 200.67  
Area = 52143  
Height = 6455.0  
Similarity = 778

Peak True - sample "AnMbr B (20191120):1", peak 776, at 787.824 , 1.307 sec , sec (Spec # 46838)

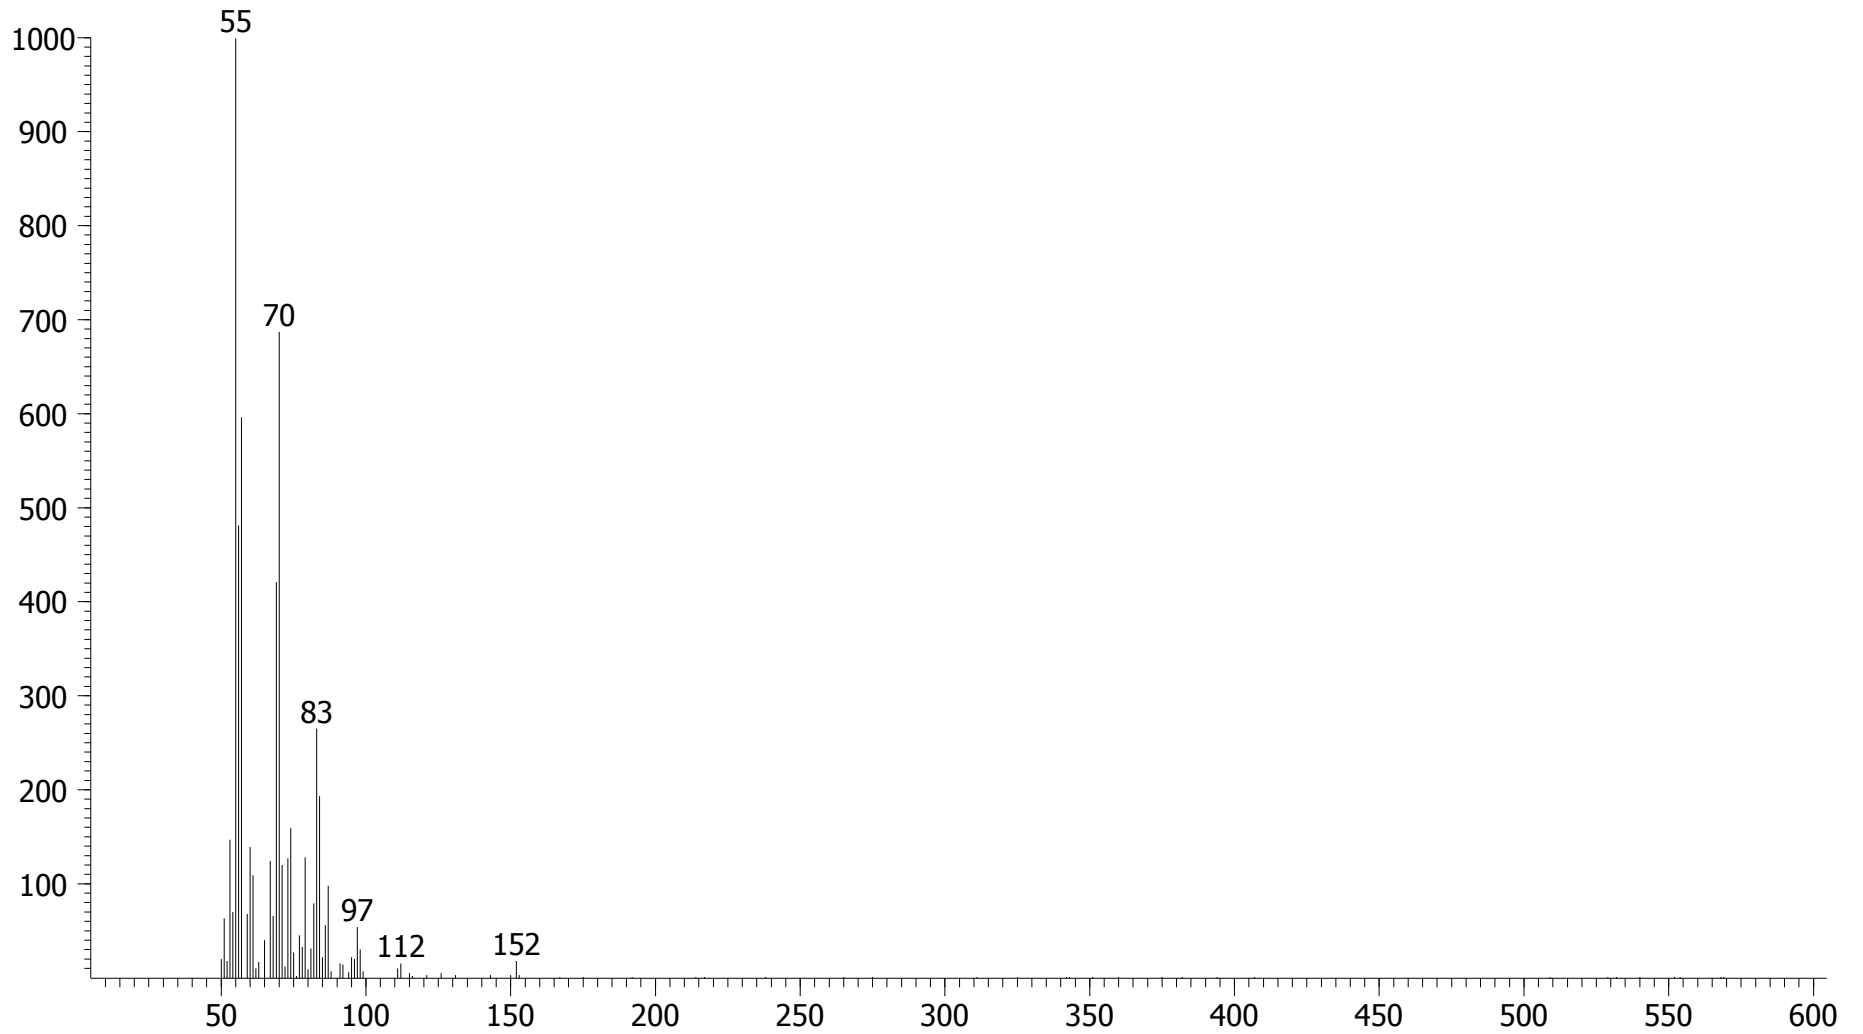

1st Dimension R.T. = 1001.2  
2nd Dimension R.T. = 1.881  
Quant Mass(es) = 126  
S/N = 110.39  
Area = 9360.2  
Height = 1174.5  
Similarity = 605

Peak True - sample "AnMbr B (20191120):1", peak 1629, at 1001.2 , 1.881 sec , sec (Spec # 79255)

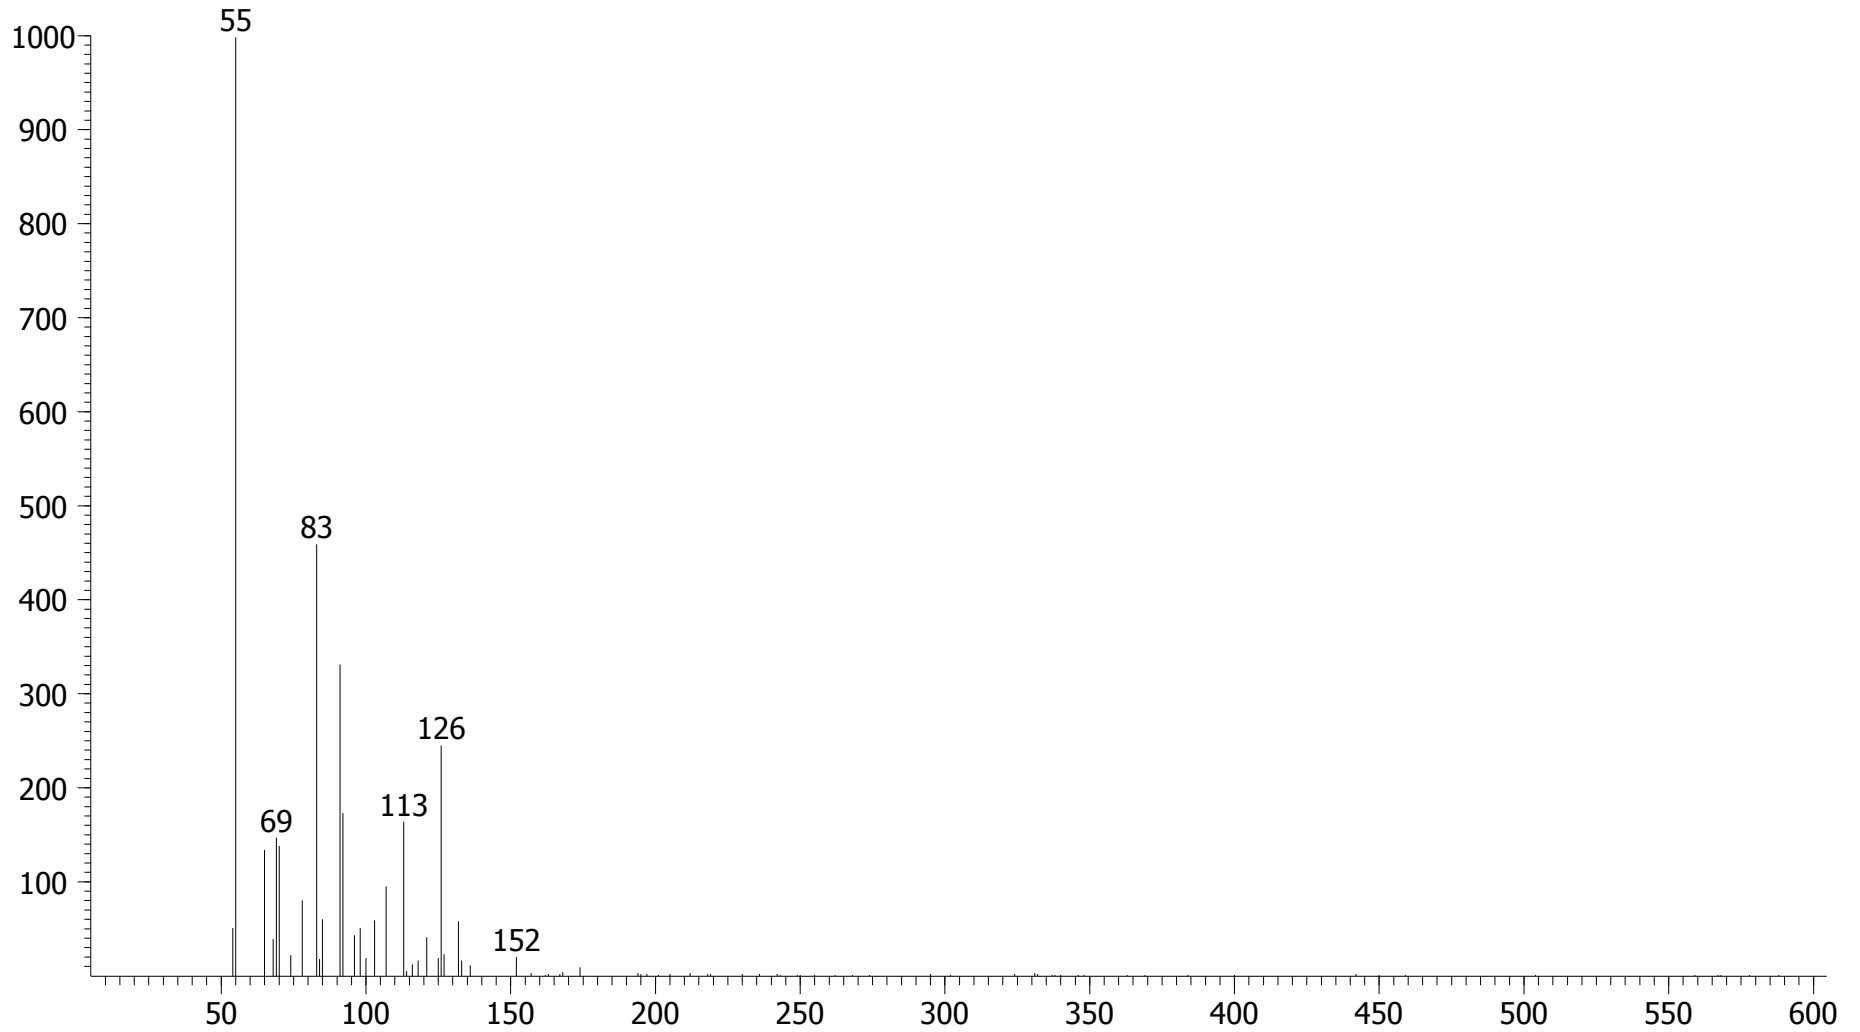

1st Dimension R.T. = 1015.19  
2nd Dimension R.T. = 2.132  
Quant Mass(es) = 124  
S/N = 79.212  
Area = 8317.8  
Height = 819.48  
Similarity = 631

Peak True - sample "AnMbr B (20191120):1", peak 1696, at 1015.19 , 2.132 sec , sec (Spec # 81413)

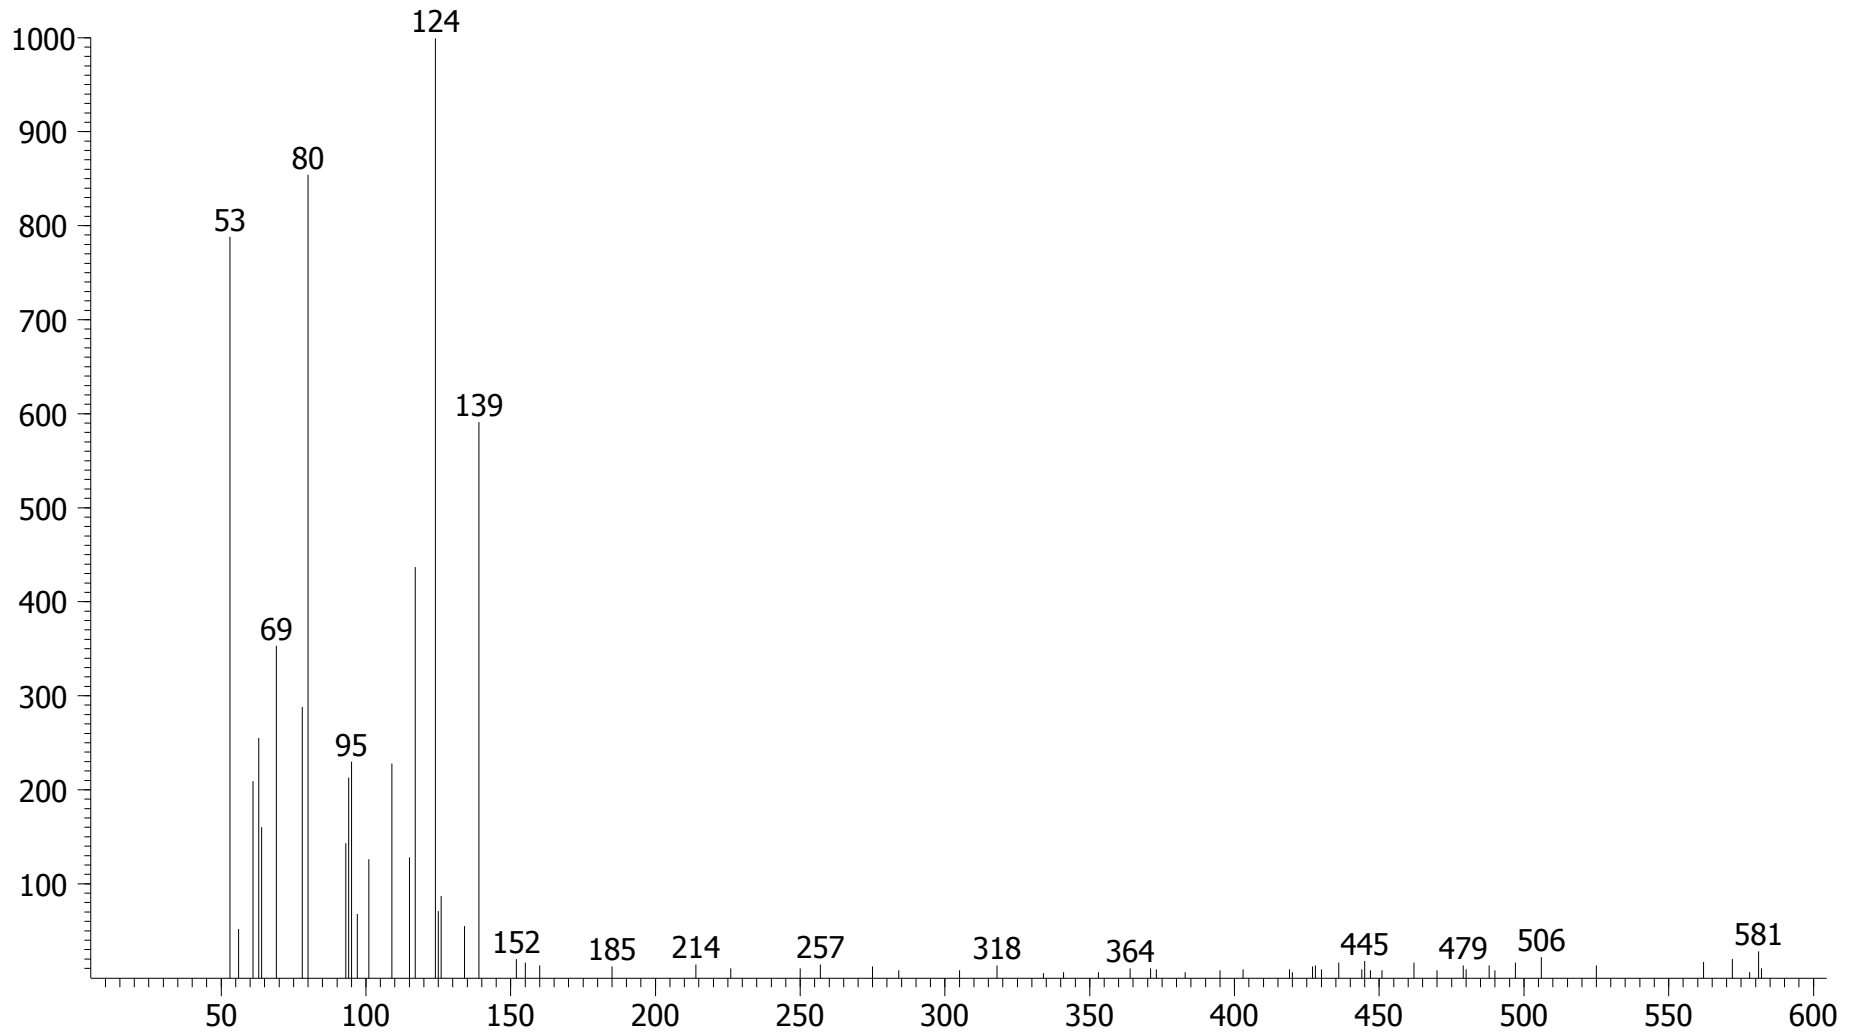

1st Dimension R.T. = 1113.14  
2nd Dimension R.T. = 1.188  
Quant Mass(es) = 56  
S/N = 1718.9  
Area = 984511  
Height = 164314  
Similarity = 946

Peak True - sample "AnMbr B (20191120):1", peak 2095, at 1113.14 , 1.188 sec , sec (Spec # 96110)

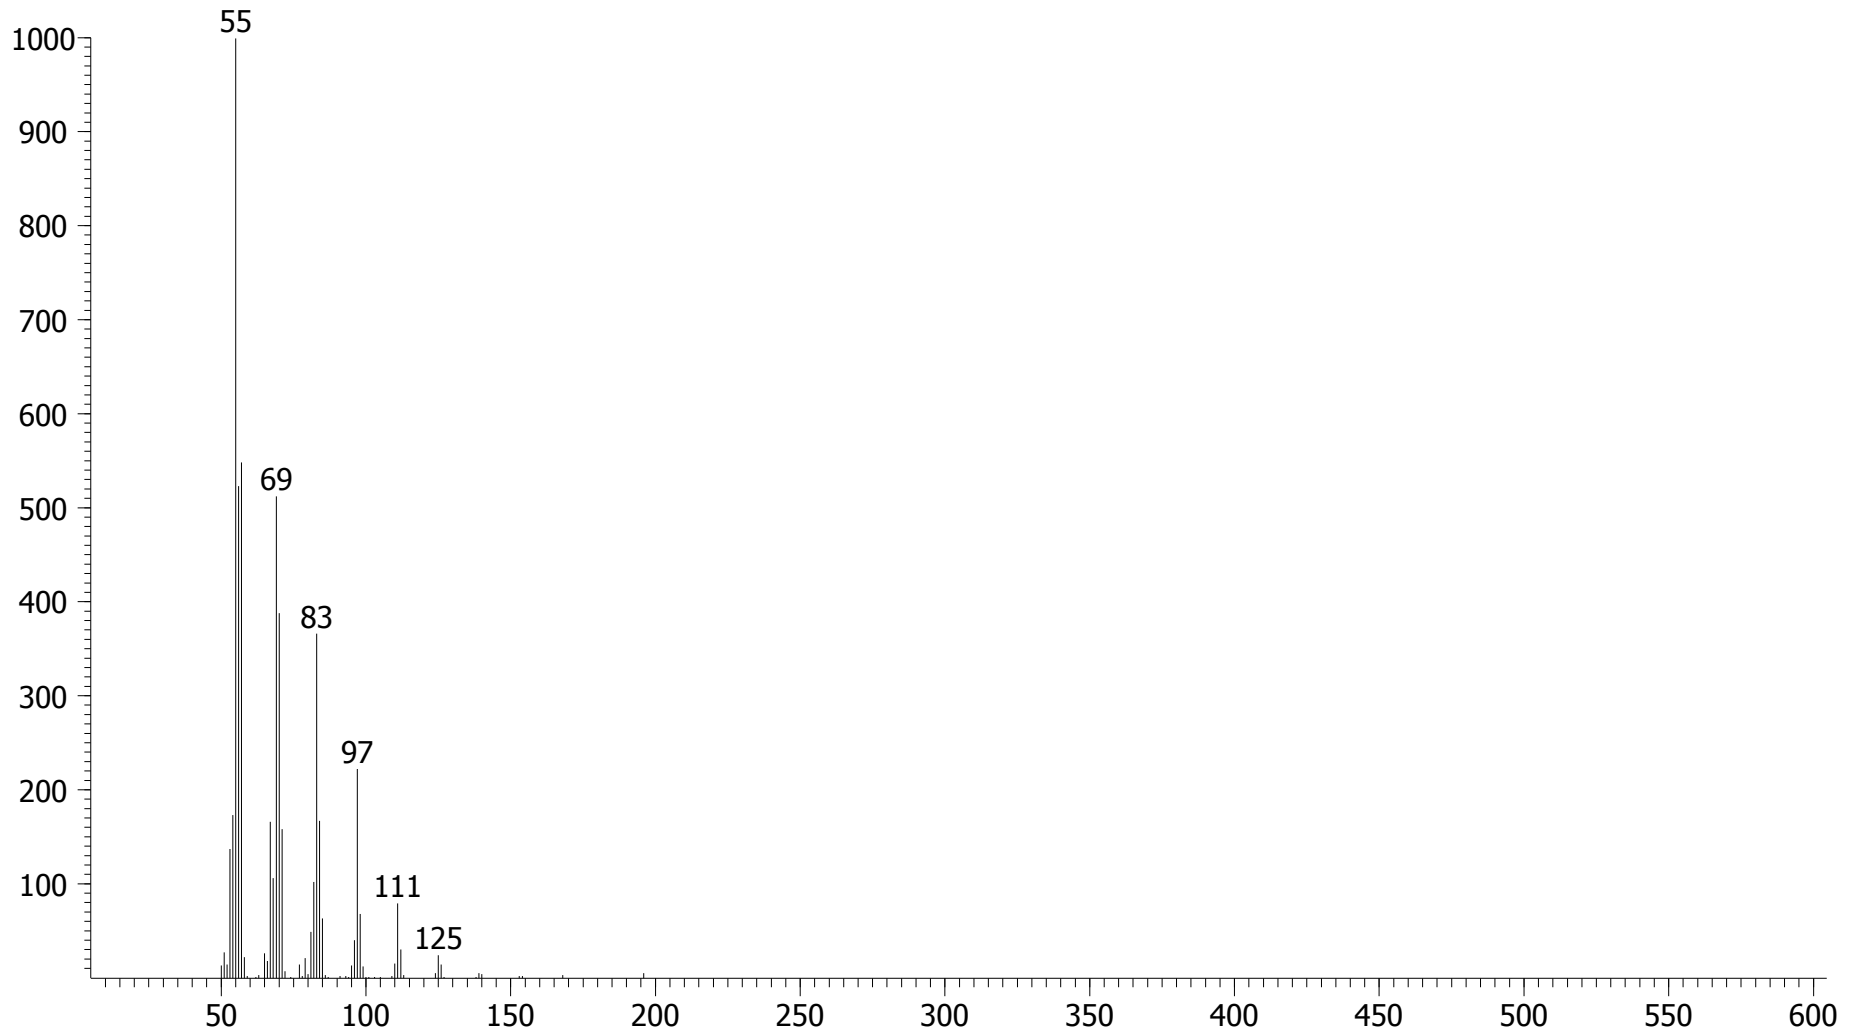

1st Dimension R.T. = 1211.08  
2nd Dimension R.T. = 2.145  
Quant Mass(es) = 107  
S/N = 74.238  
Area = 186825  
Height = 17316  
Similarity = 877

Peak True - sample "AnMbr B (20191120):1", peak 2571, at 1211.08 , 2.145 sec , sec (Spec # 111095)

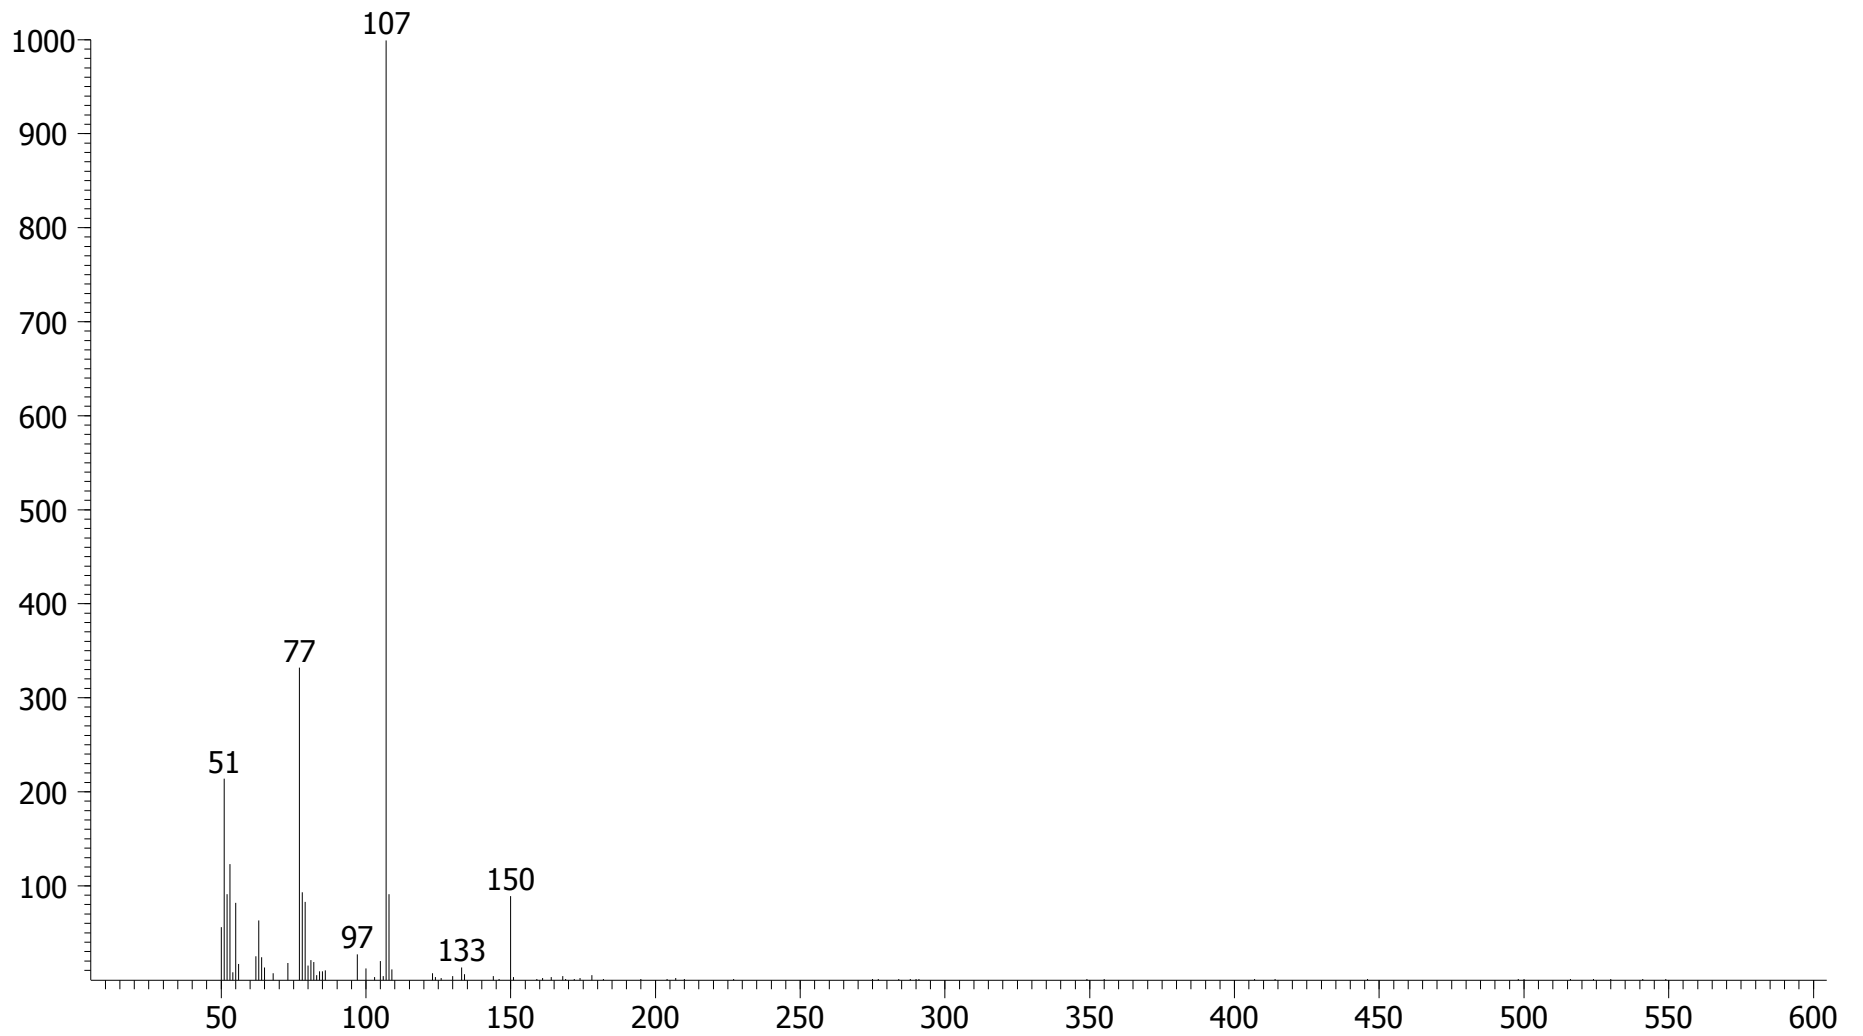

1st Dimension R.T. = 1274.05  
2nd Dimension R.T. = 1.313  
Quant Mass(es) = 57  
S/N = 917.94  
Area = 3105900  
Height = 406062  
Similarity = 943

Peak True - sample "AnMbr B (20191120):1", peak 2881, at 1274.05 , 1.313 sec , sec (Spec # 120509)

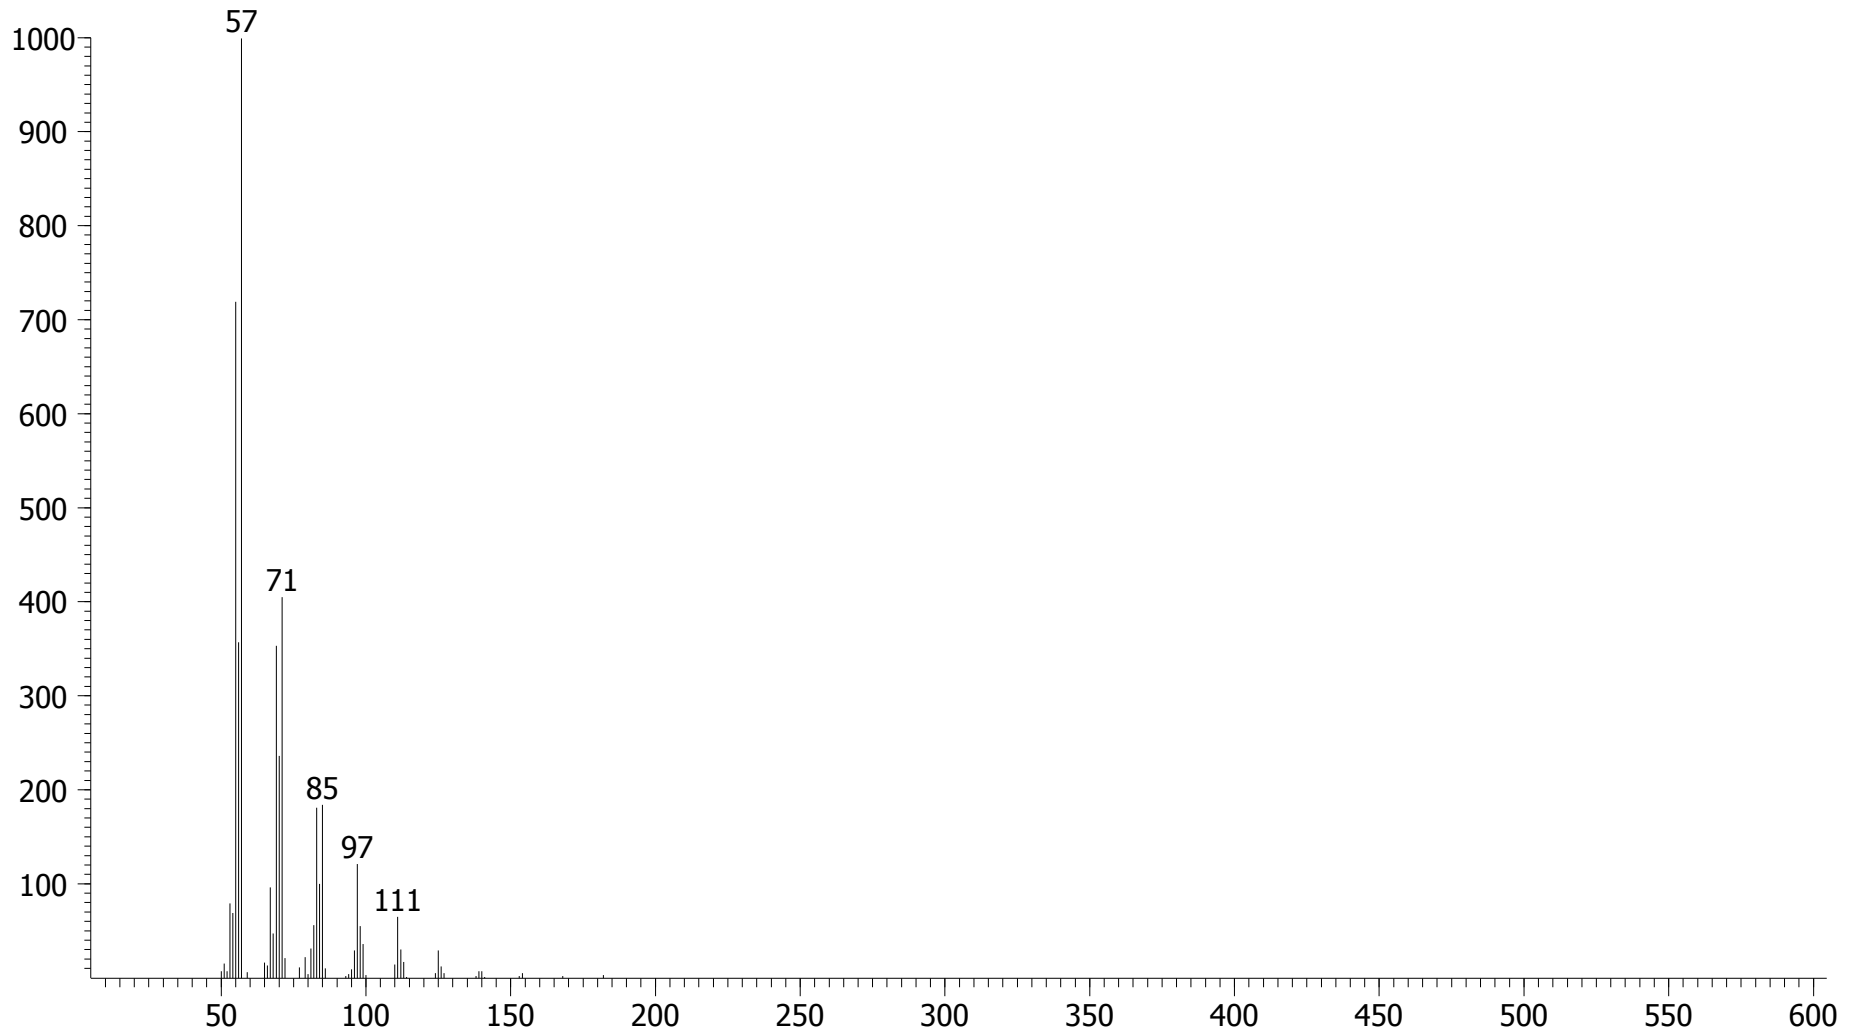



1st Dimension R.T. = 1309.03  
2nd Dimension R.T. = 1.162  
Quant Mass(es) = 69  
S/N = 733.08  
Area = 180051  
Height = 26823  
Similarity = 836

Peak True - sample "AnMbr B (20191120):1", peak 3049, at 1309.03 , 1.162 sec , sec (Spec # 125786)

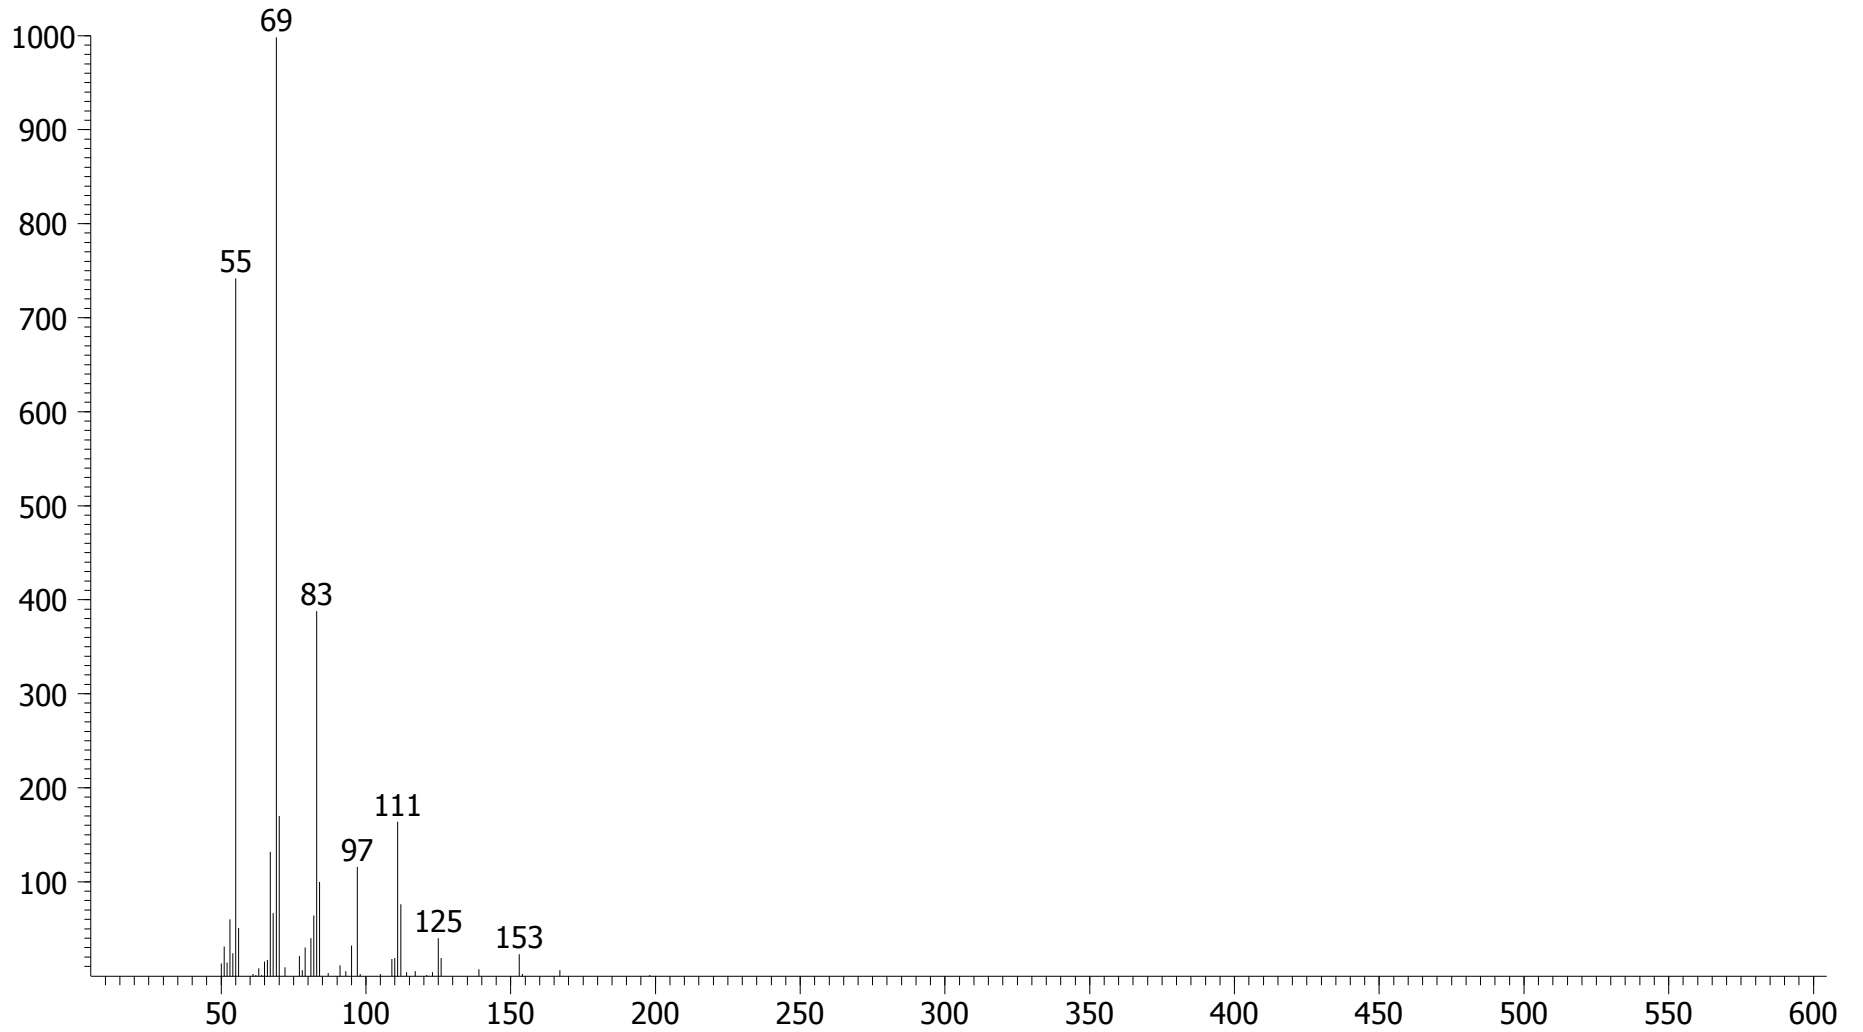

1st Dimension R.T. = 1333.51  
2nd Dimension R.T. = 1.907  
Quant Mass(es) = 72  
S/N = 258.92  
Area = 66364  
Height = 6551.2  
Similarity = 780

Peak True - sample "AnMbr B (20191120):1", peak 3176, at 1333.51 , 1.907 sec , sec (Spec # 129609)

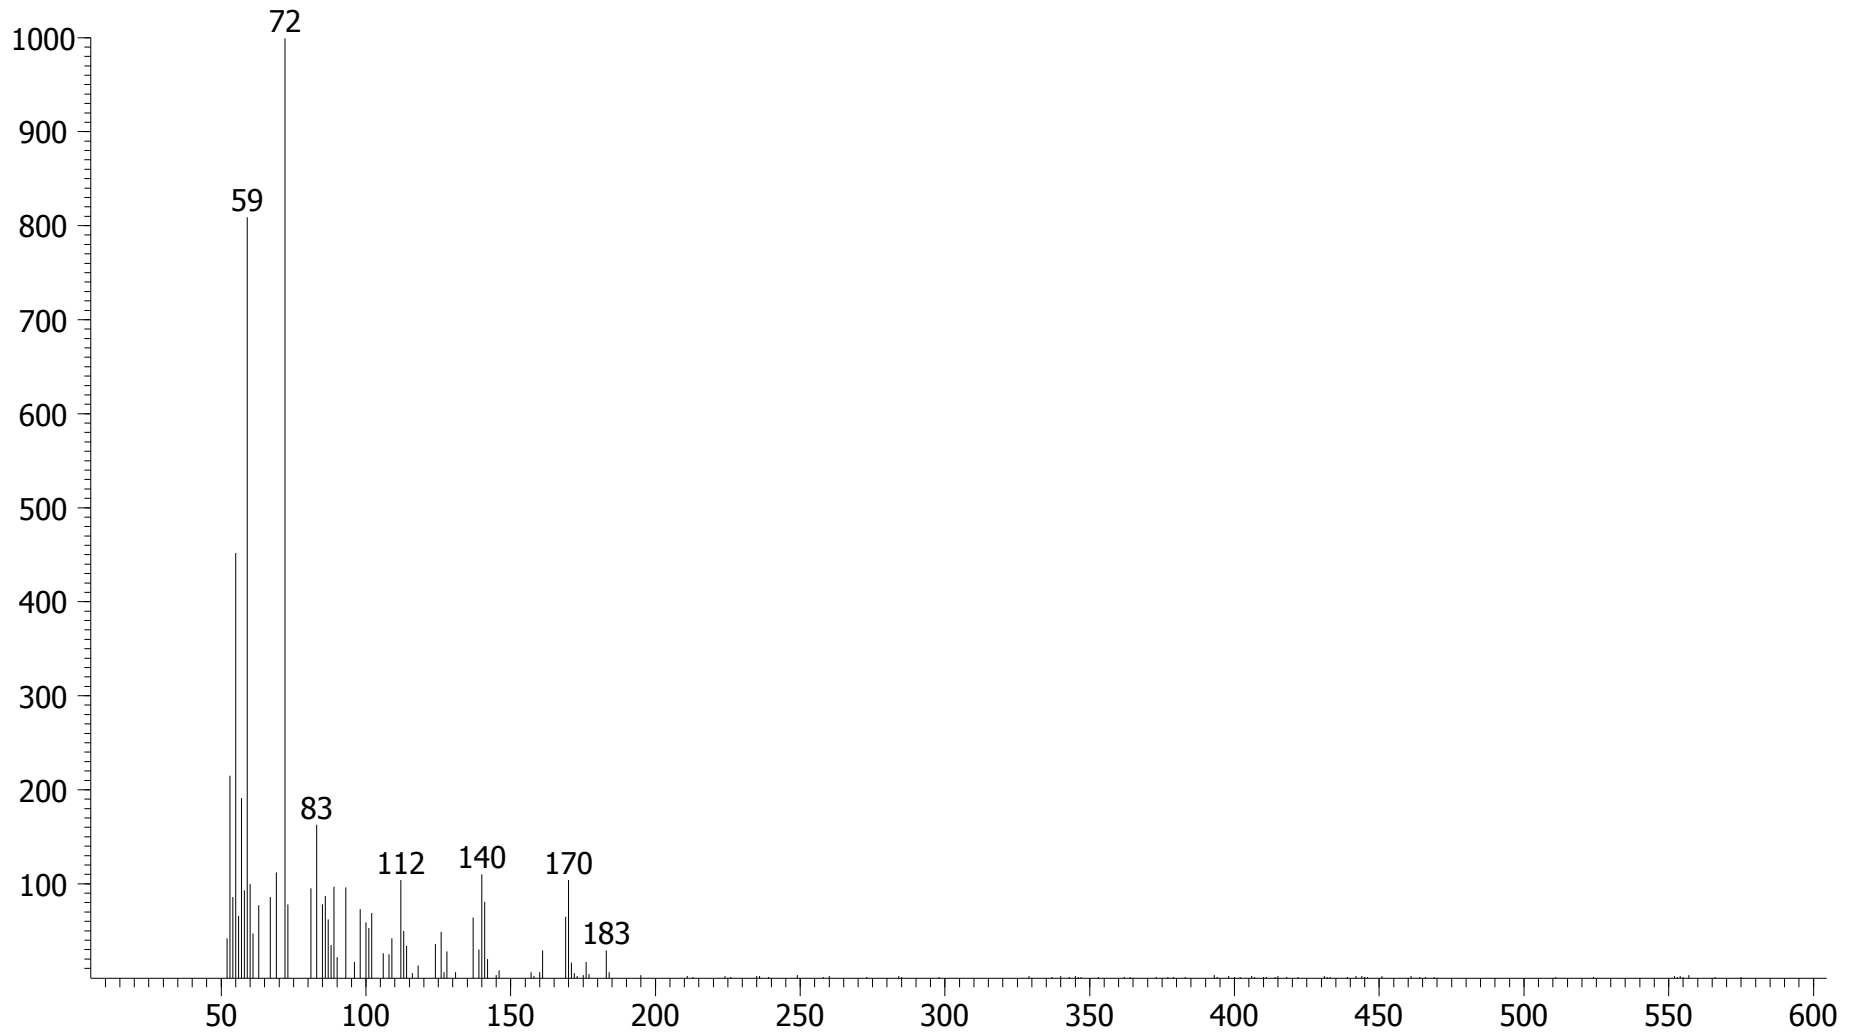

1st Dimension R.T. = 1351  
2nd Dimension R.T. = 1.802  
Quant Mass(es) = 140  
S/N = 325.44  
Area = 26599  
Height = 2767.2  
Similarity = 650

Peak True - sample "AnMbr B (20191120):1", peak 3280, at 1351 , 1.802 sec , sec (Spec # 132243)

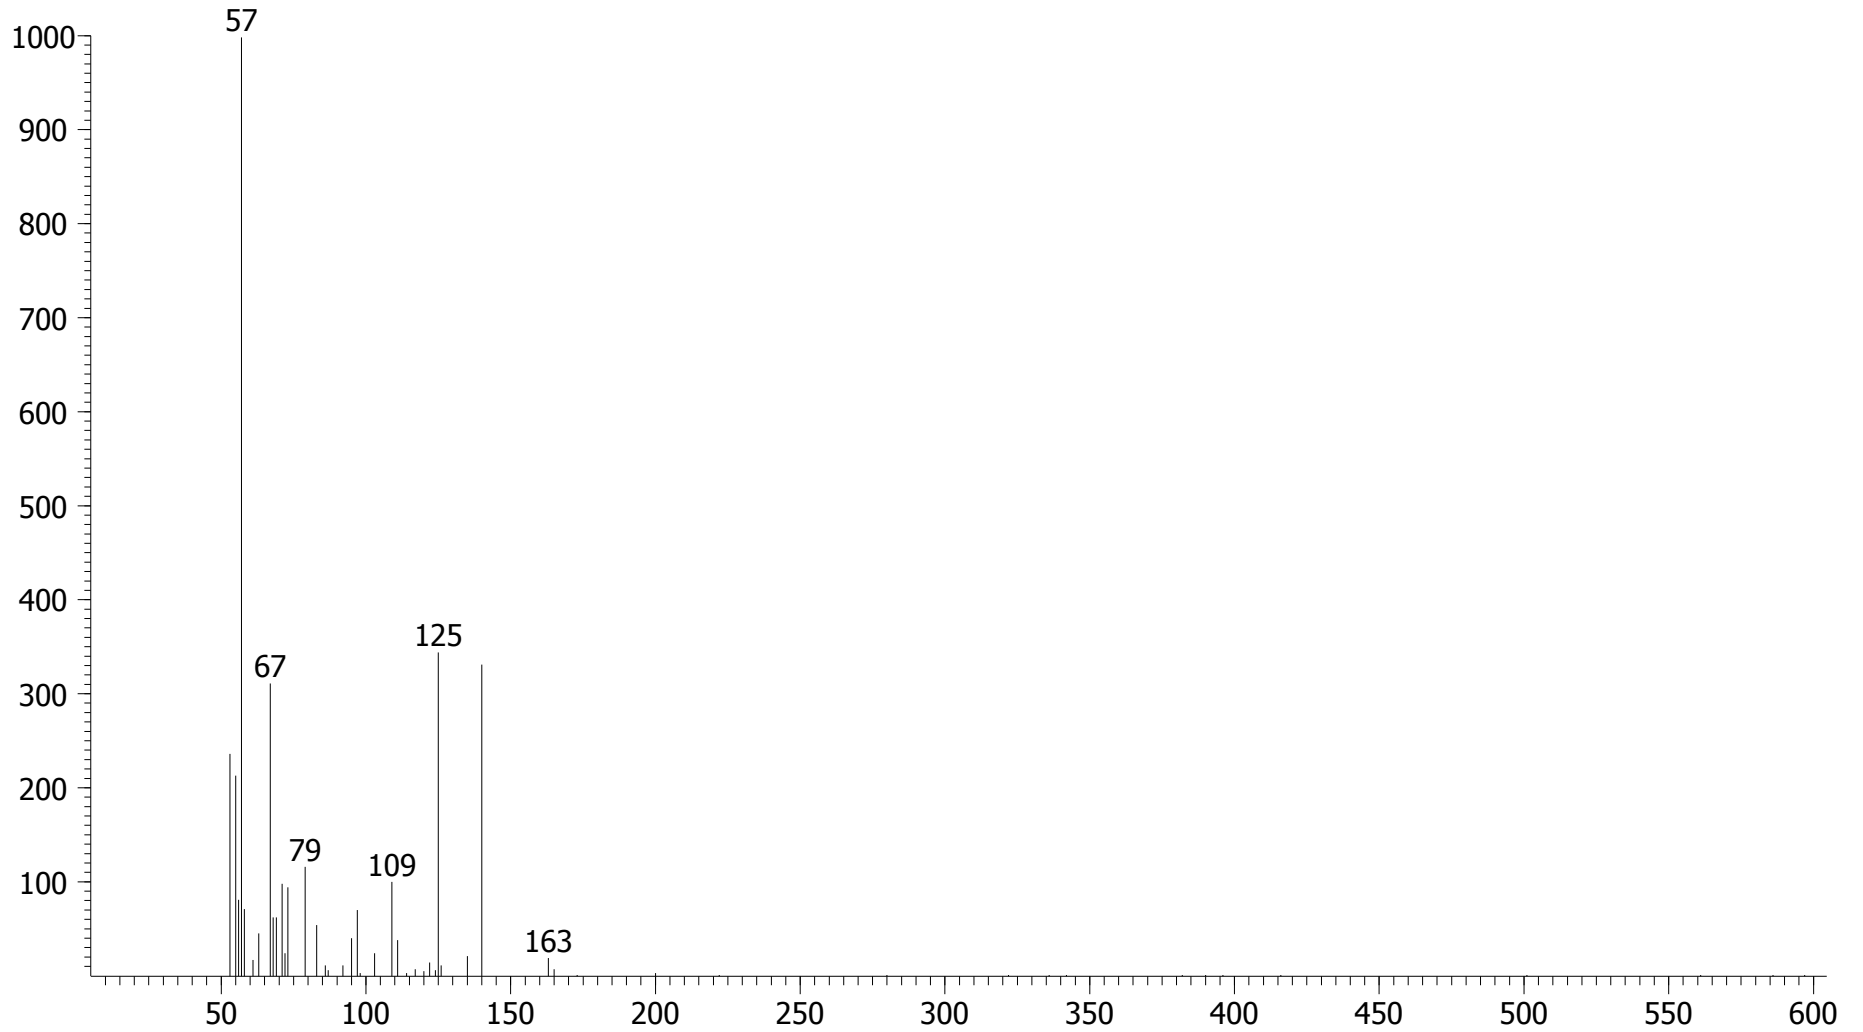

1st Dimension R.T. = 1382.48  
2nd Dimension R.T. = 2.218  
Quant Mass(es) = 123  
S/N = 63.888  
Area = 6500.1  
Height = 660.91  
Similarity = 626

Peak True - sample "AnMbr B (20191120):1", peak 3450, at 1382.48 , 2.218 sec , sec (Spec # 137076)

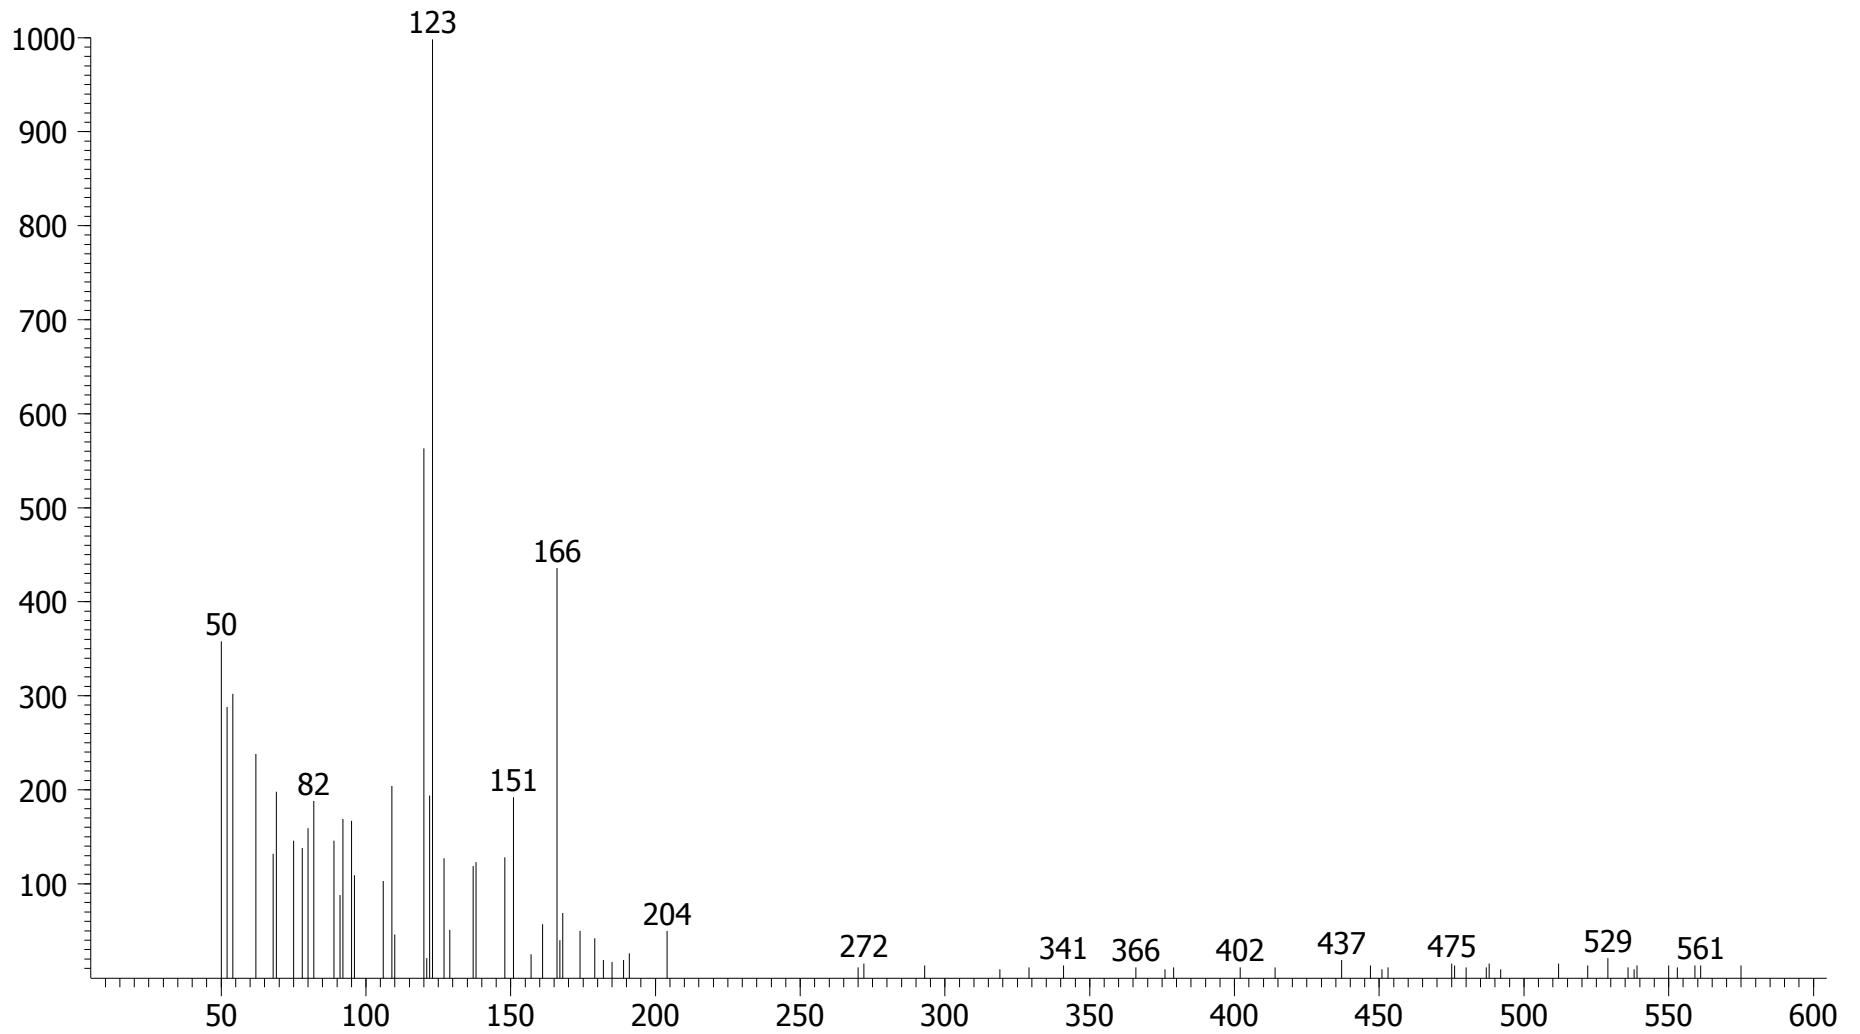

1st Dimension R.T. = 1459.44  
2nd Dimension R.T. = 2.165  
Quant Mass(es) = 191  
S/N = 79.892  
Area = 4522.8  
Height = 463.33  
Similarity = 603

Peak True - sample "AnMbr B (20191120):1", peak 3814, at 1459.44 , 2.165 sec , sec (Spec # 148728)

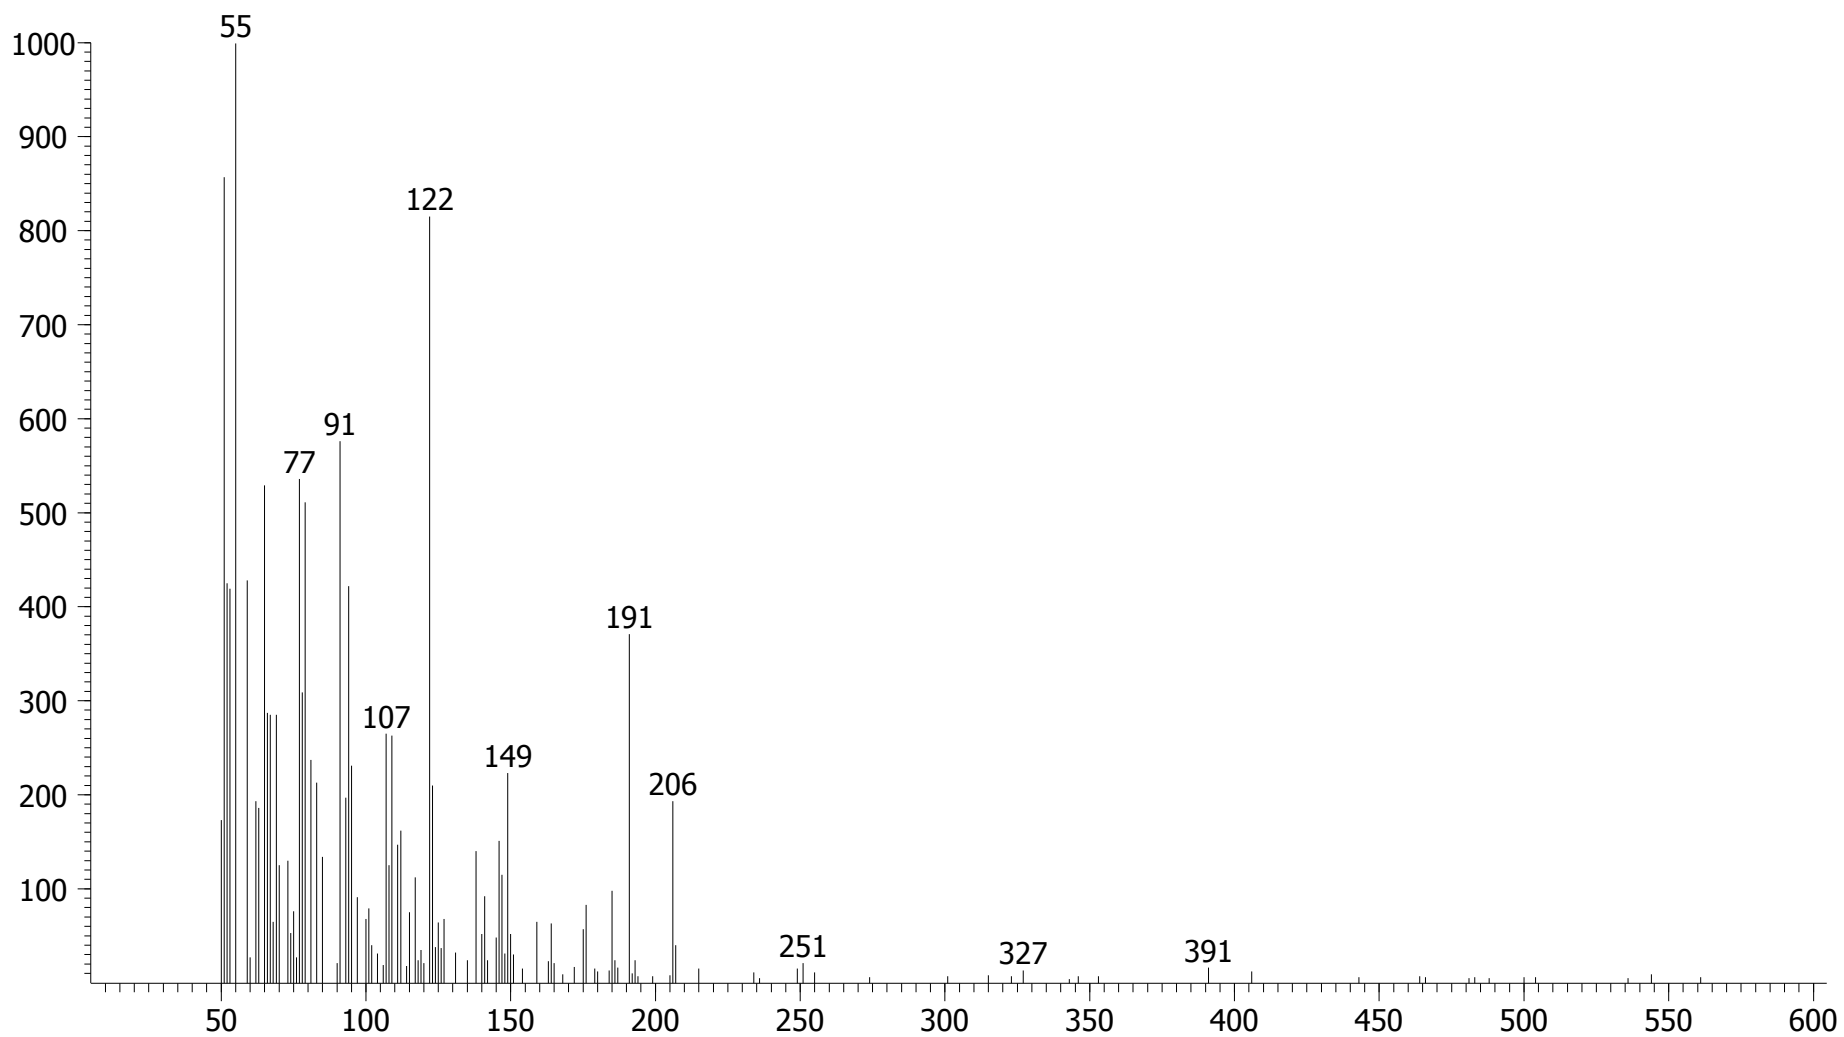

1st Dimension R.T. = 1522.4  
2nd Dimension R.T. = 1.657  
Quant Mass(es) = 144  
S/N = 227.69  
Area = 24783  
Height = 2783.2  
Similarity = 587

Peak True - sample "AnMbr B (20191120):1", peak 4104, at 1522.4 , 1.657 sec , sec (Spec # 158191)

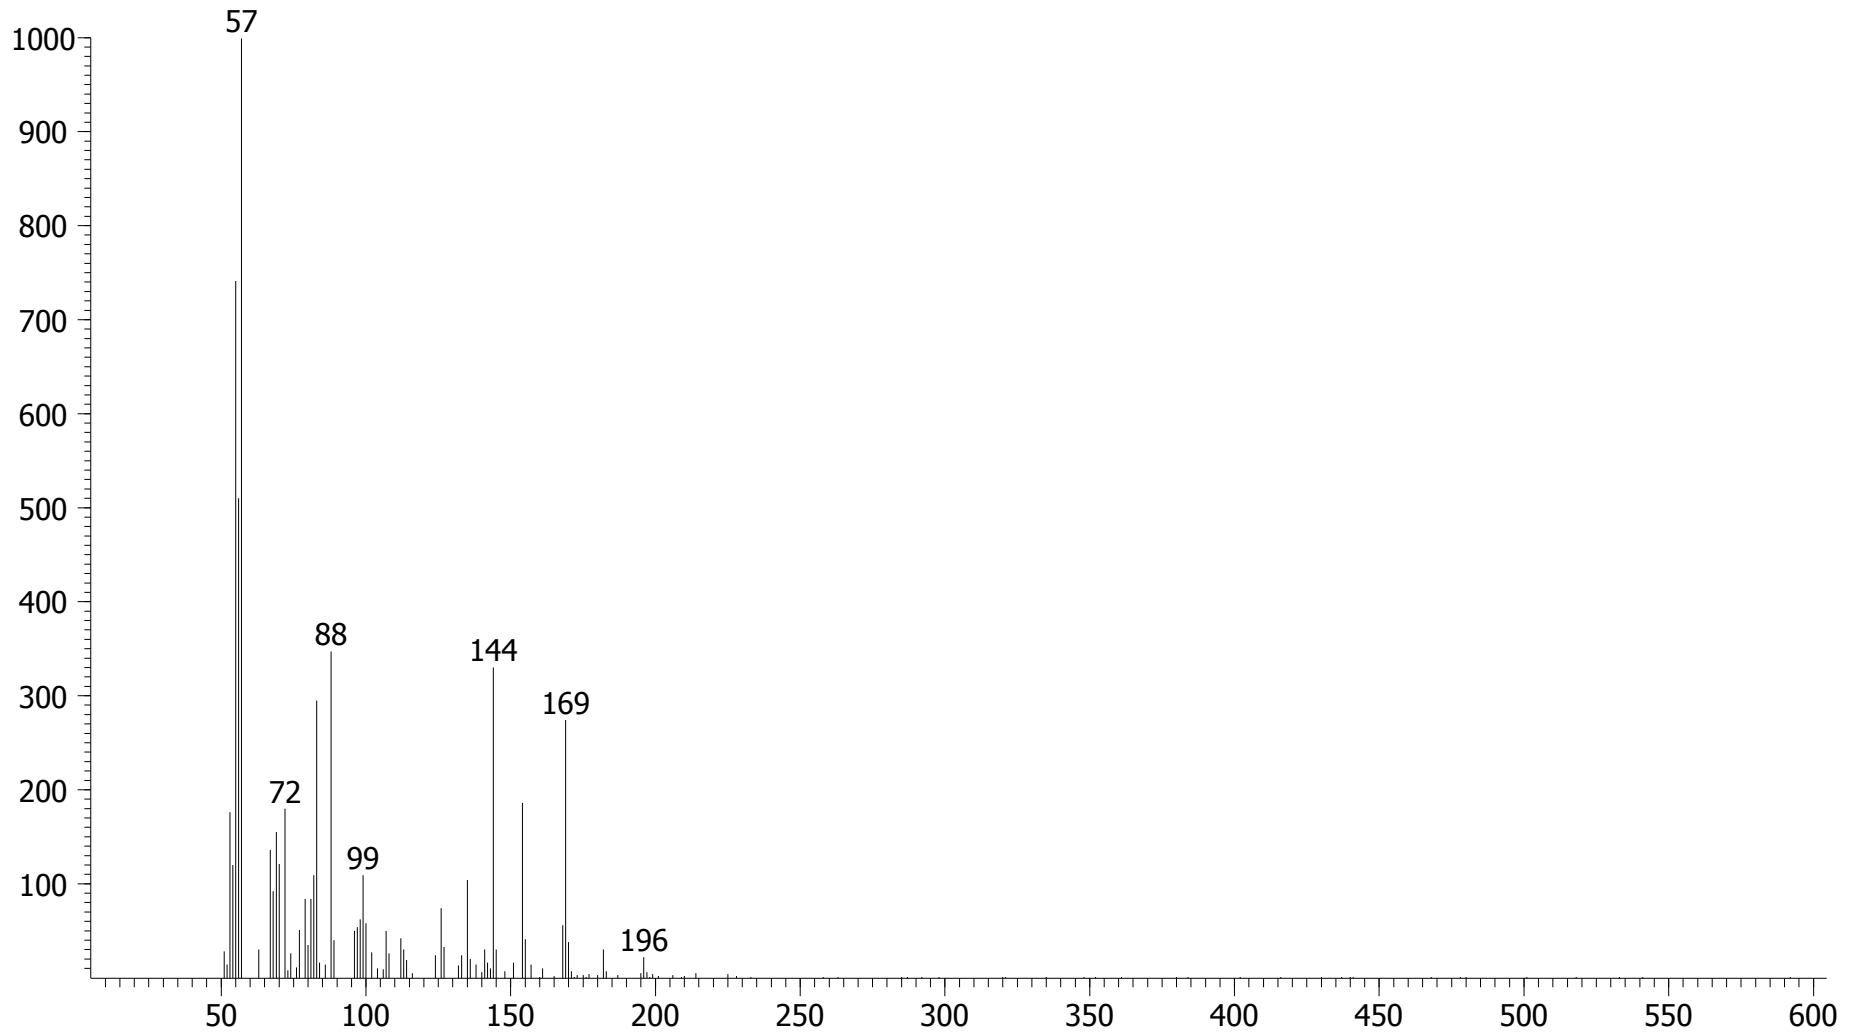

1st Dimension R.T. = 1543.39  
2nd Dimension R.T. = 1.175  
Quant Mass(es) = 71  
S/N = 158.15  
Area = 170899  
Height = 15079  
Similarity = 883

Peak True - sample "AnMbr B (20191120):1", peak 4192, at 1543.39 , 1.175 sec , sec (Spec # 161298)

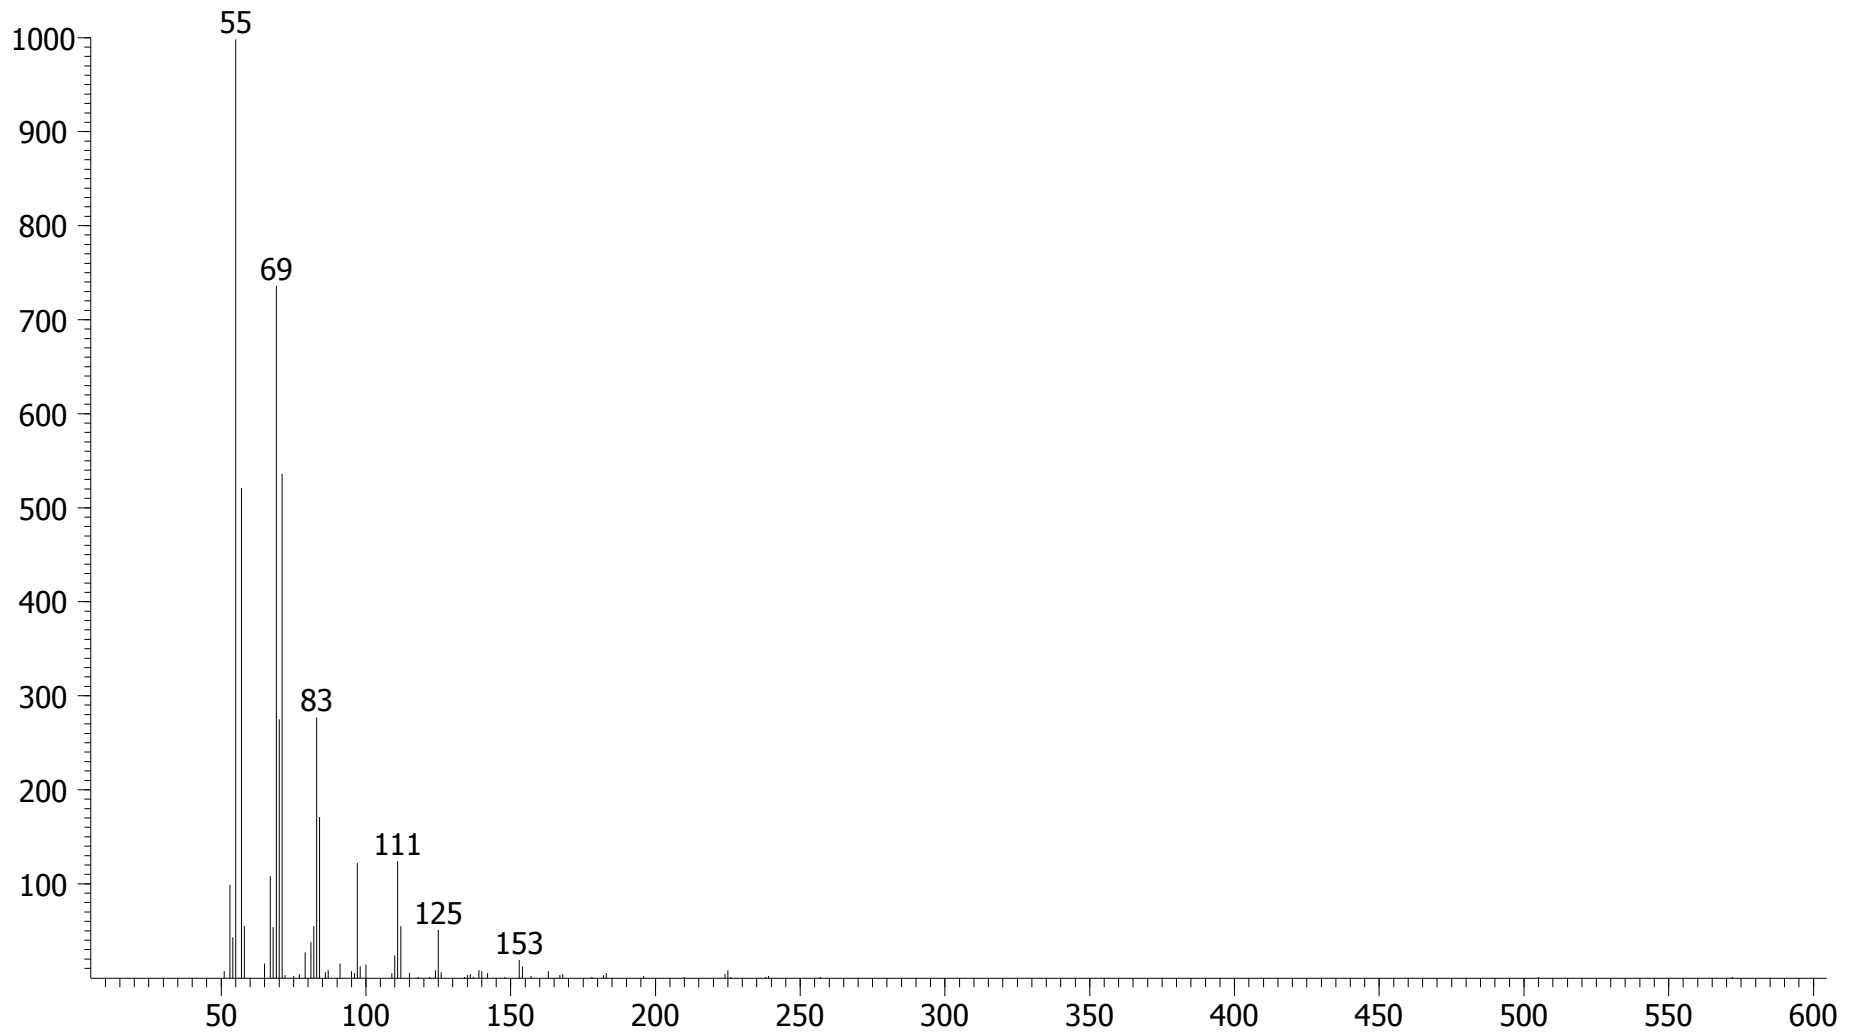

1st Dimension R.T. = 1840.72  
2nd Dimension R.T. = 1.195  
Quant Mass(es) = 71  
S/N = 59.115  
Area = 196032  
Height = 15720  
Similarity = 918

Peak True - sample "AnMbr B (20191120):1", peak 5477, at 1840.72 , 1.195 sec , sec (Spec # 206351)

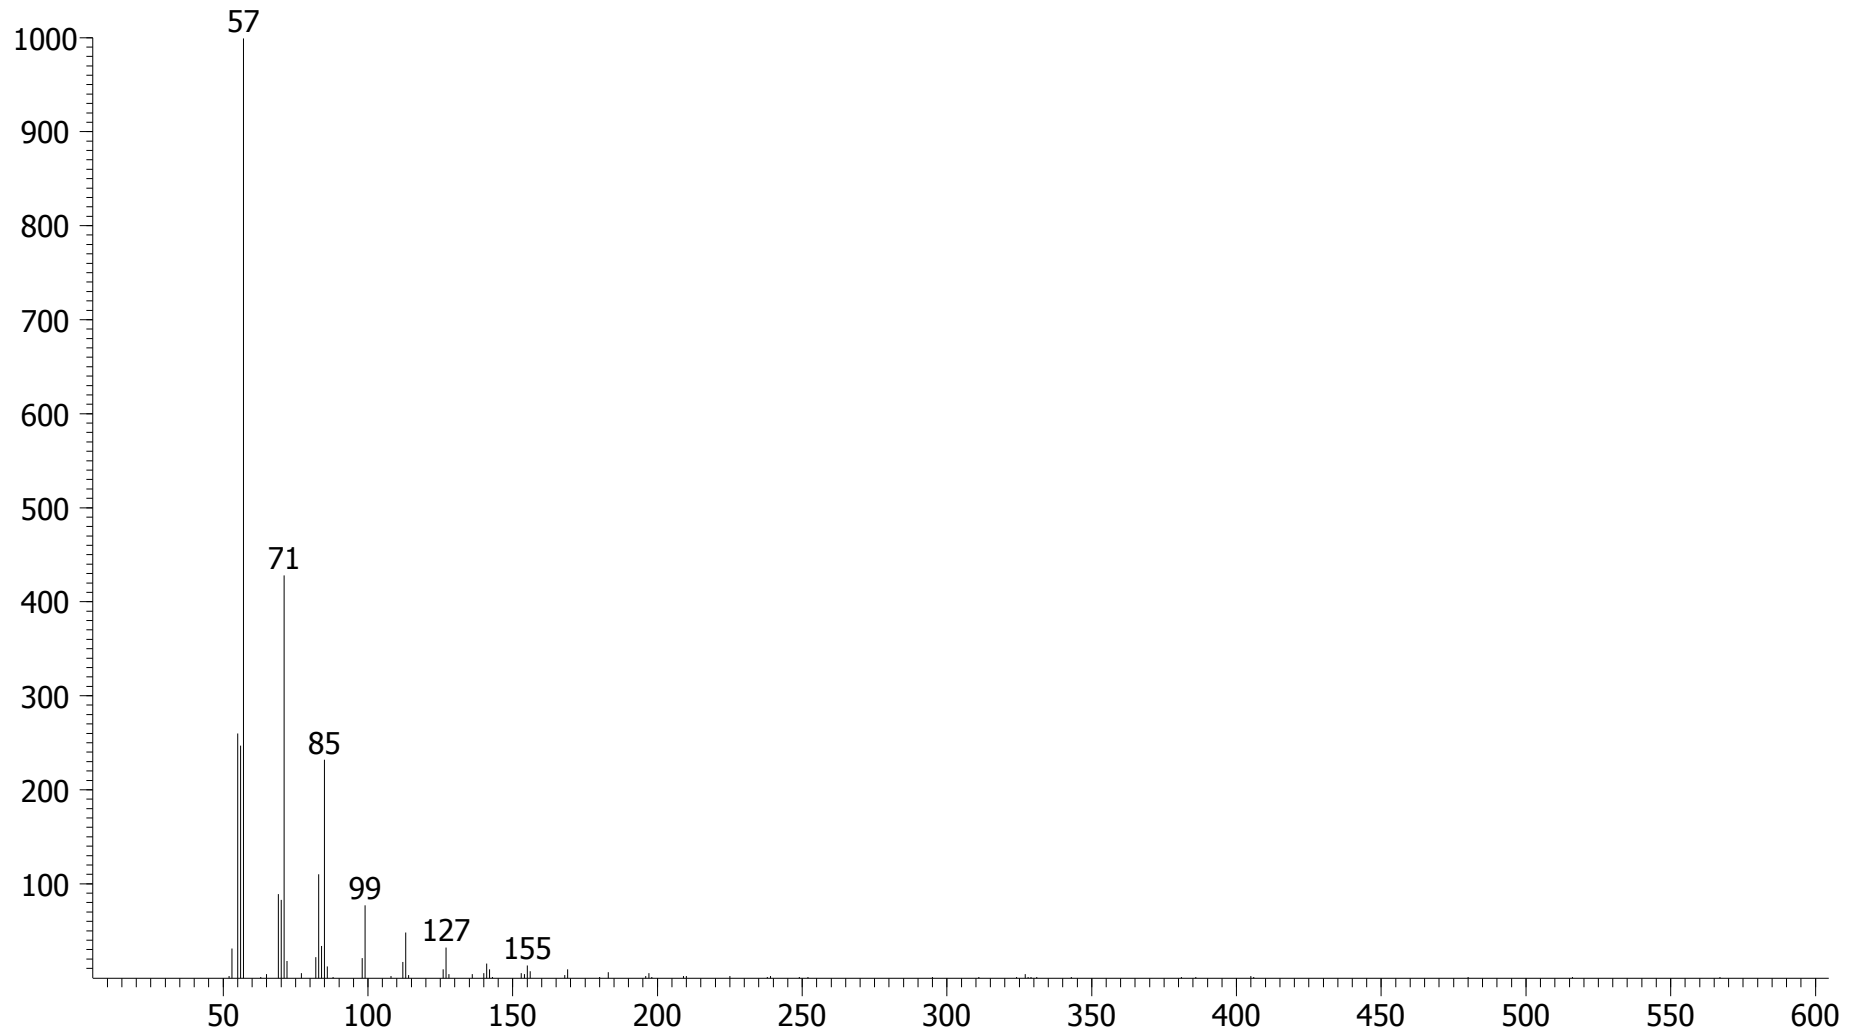



1st Dimension R.T. = 1921.18  
2nd Dimension R.T. = 1.492  
Quant Mass(es) = 60  
S/N = 69.643  
Area = 144522  
Height = 13149  
Similarity = 722

Peak True - sample "AnMbr B (20191120):1", peak 5652, at 1921.18 , 1.492 sec , sec (Spec # 218586)

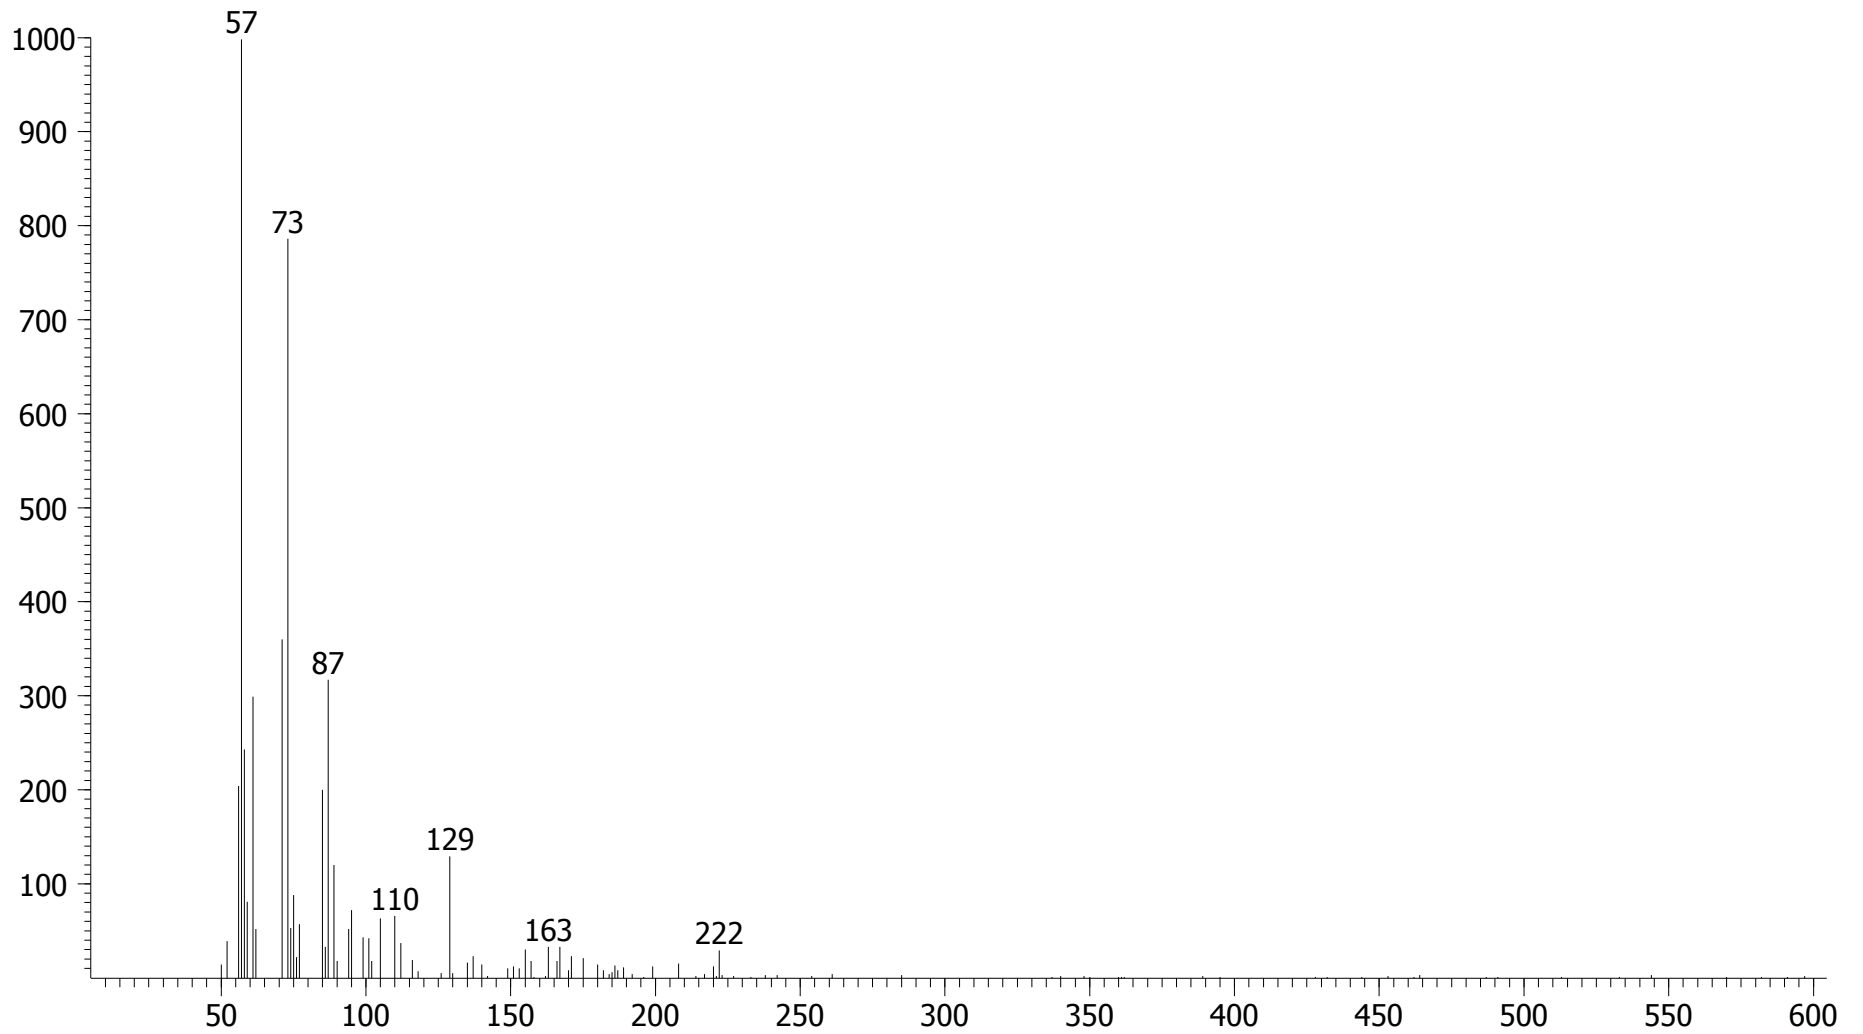

1st Dimension R.T. = 1945.66  
2nd Dimension R.T. = 1.261  
Quant Mass(es) = 97  
S/N = 579.11  
Area = 285873  
Height = 30979  
Similarity = 952

Peak True - sample "AnMbr B (20191120):1", peak 5710, at 1945.66 , 1.261 sec , sec (Spec # 222261)

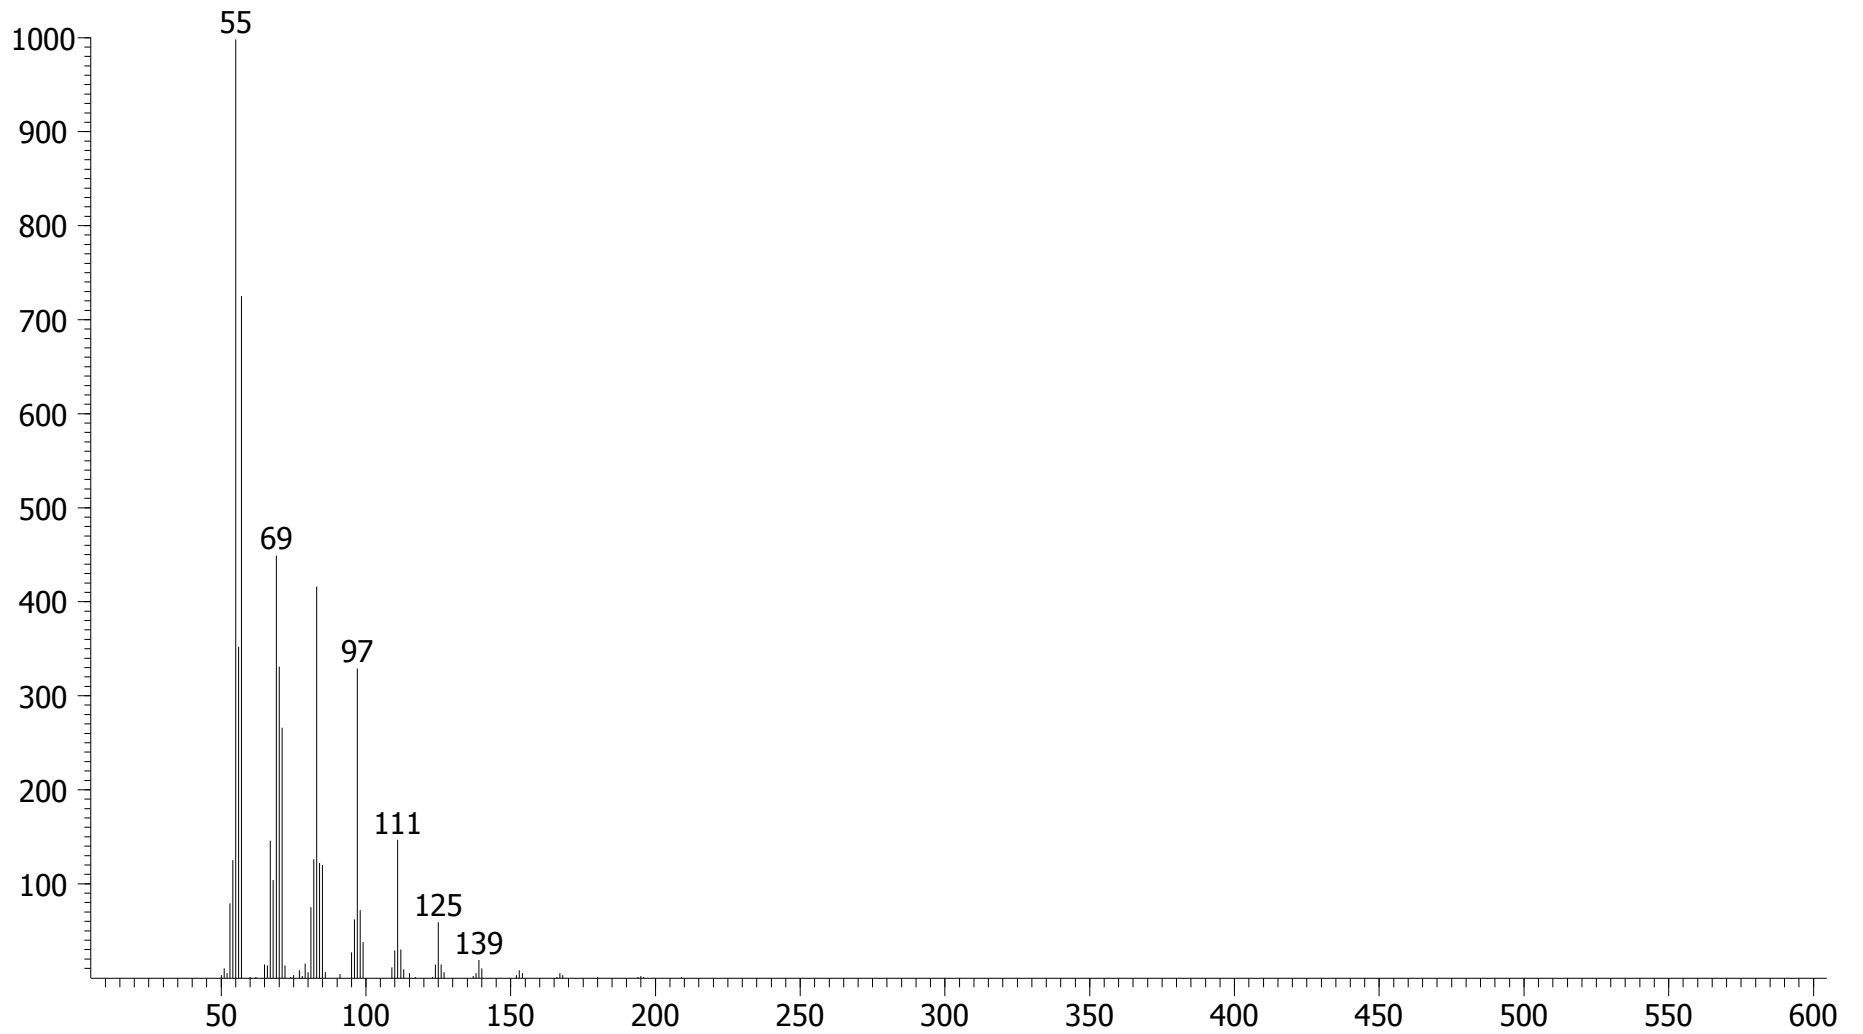

1st Dimension R.T. = 2078.59  
2nd Dimension R.T. = 2.033  
Quant Mass(es) = 154  
S/N = 88.904  
Area = 16469  
Height = 1541.6  
Similarity = 607

Peak True - sample "AnMbr B (20191120):1", peak 6029, at 2078.59 , 2.033 sec , sec (Spec # 242518)

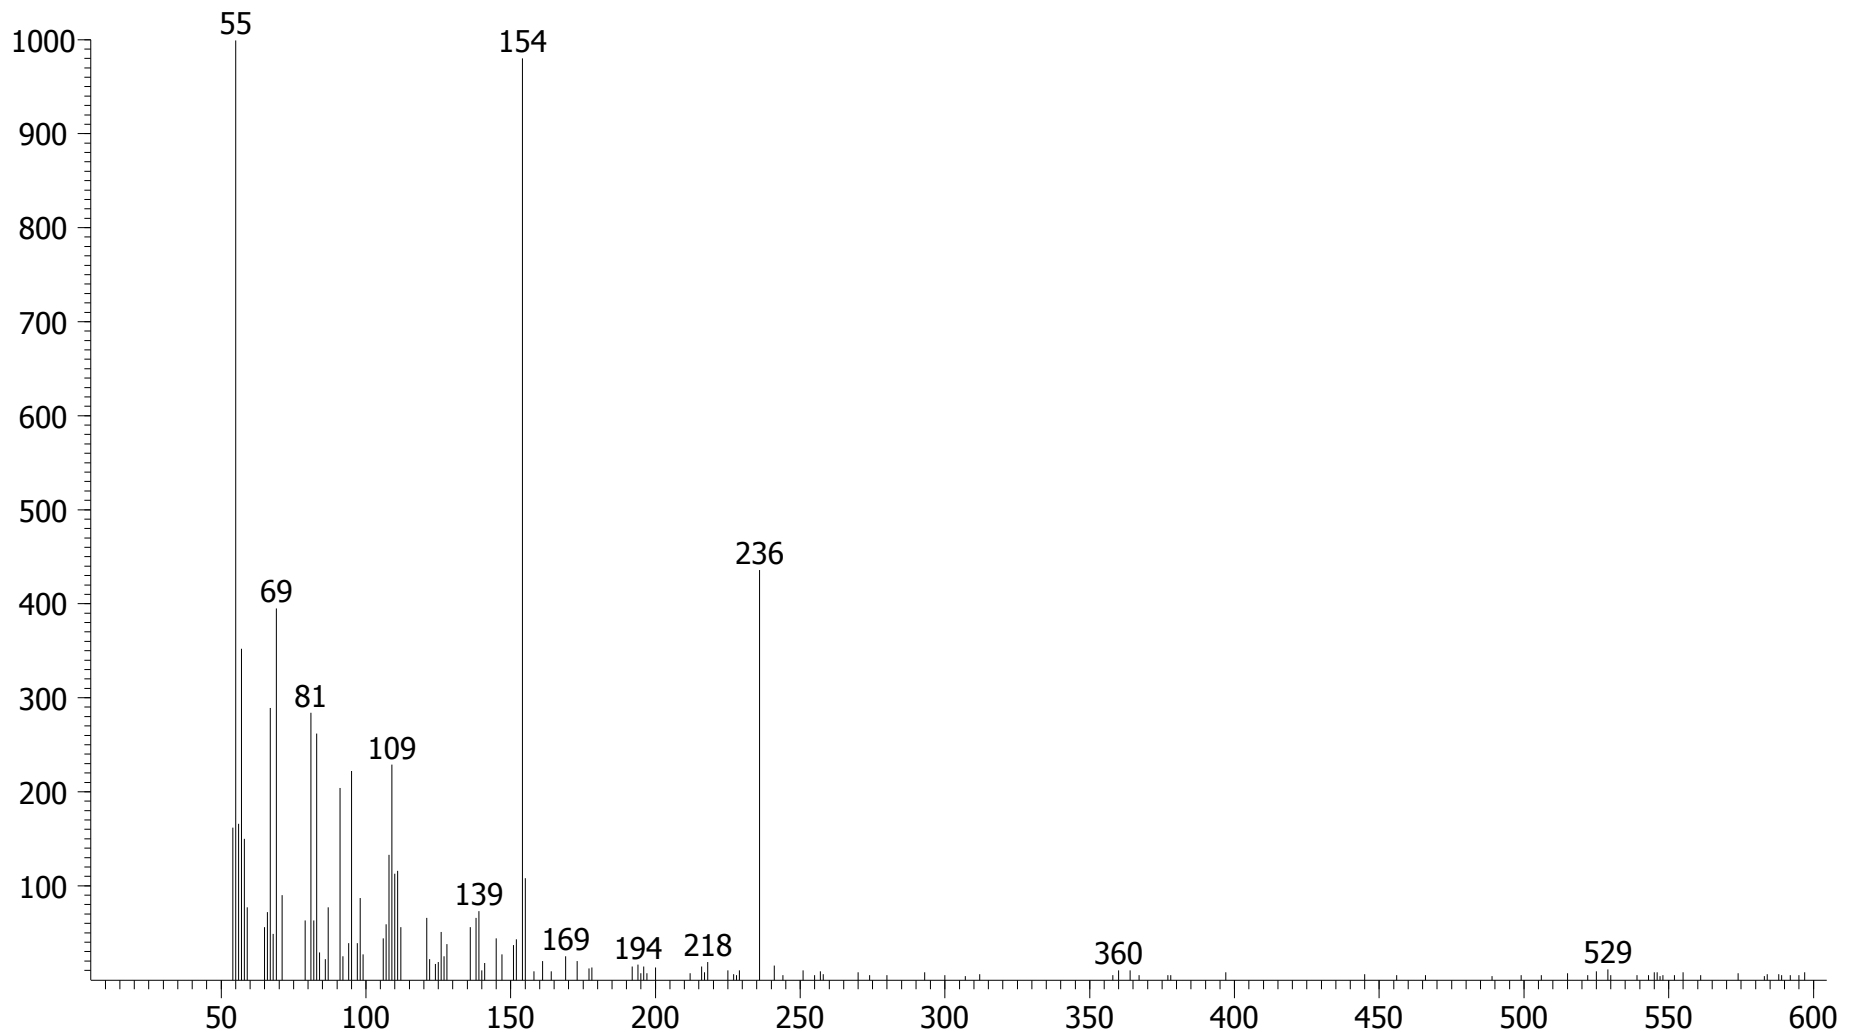

1st Dimension R.T. = 2096.08  
2nd Dimension R.T. = 1.604  
Quant Mass(es) = 57  
S/N = 166.59  
Area = 125550  
Height = 12010  
Similarity = 715

Peak True - sample "AnMbr B (20191120):1", peak 6066, at 2096.08 , 1.604 sec , sec (Spec # 245103)

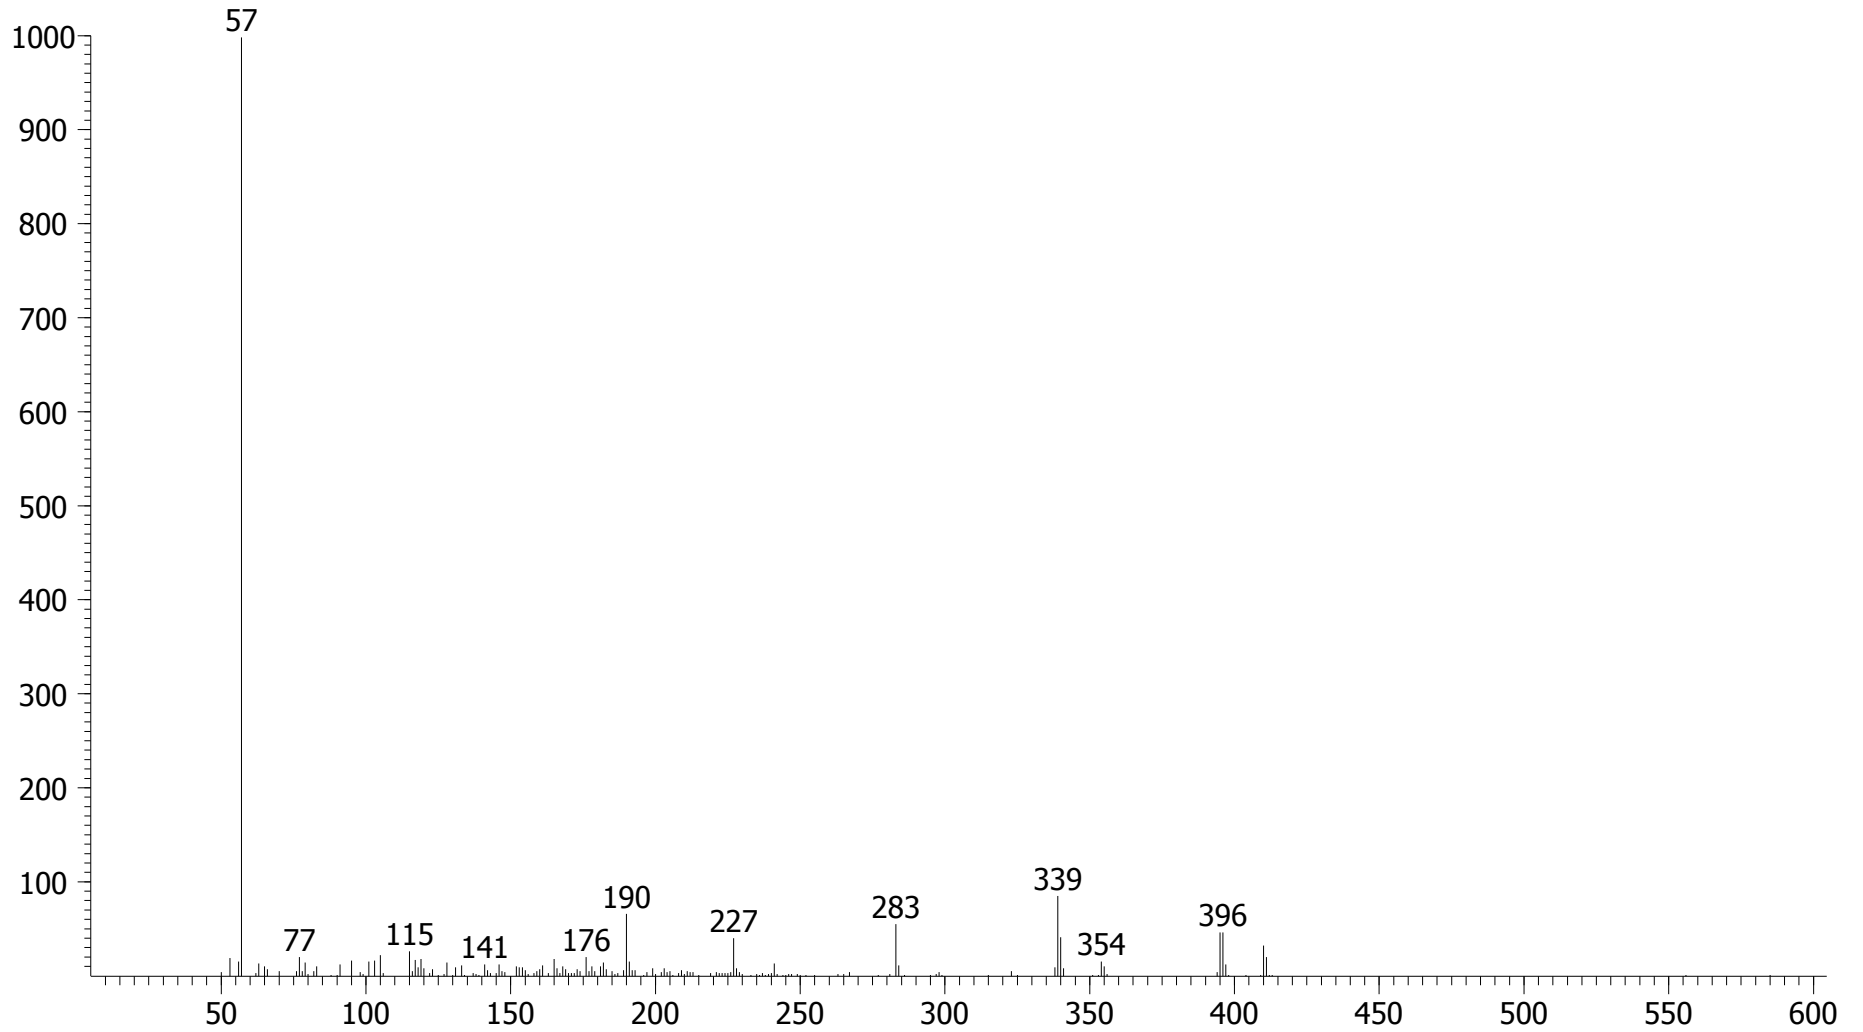

1st Dimension R.T. = 2347.93  
2nd Dimension R.T. = 0.904  
Quant Mass(es) = 135  
S/N = 48.094  
Area = 8795.9  
Height = 1436.9  
Similarity = 611

Peak True - sample "AnMbr B (20191120):1", peak 6508, at 2347.93 , 0.904 sec , sec (Spec # 283157)

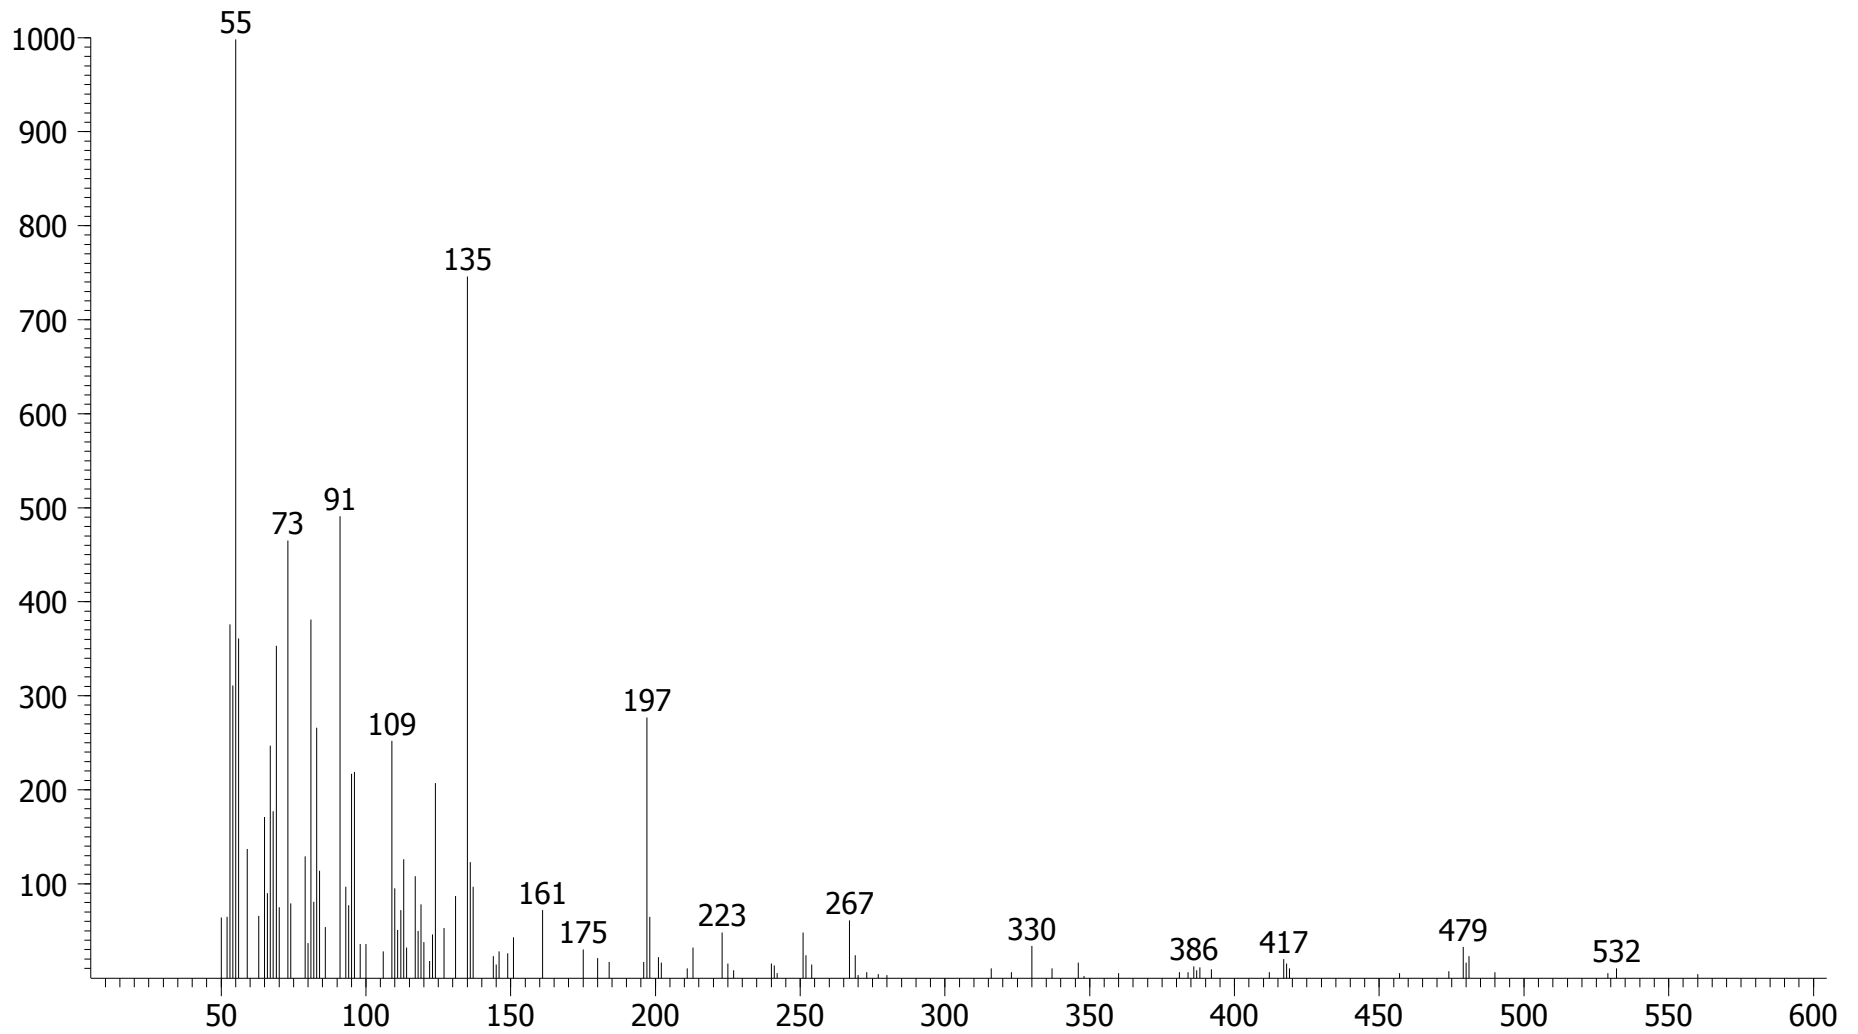

1st Dimension R.T. = 2477.36  
2nd Dimension R.T. = 1.412  
Quant Mass(es) = 68  
S/N = 100.35  
Area = 37102  
Height = 4427.7  
Similarity = 917

Peak True - sample "AnMbr B (20191120):1", peak 6720, at 2477.36 , 1.412 sec , sec (Spec # 302844)

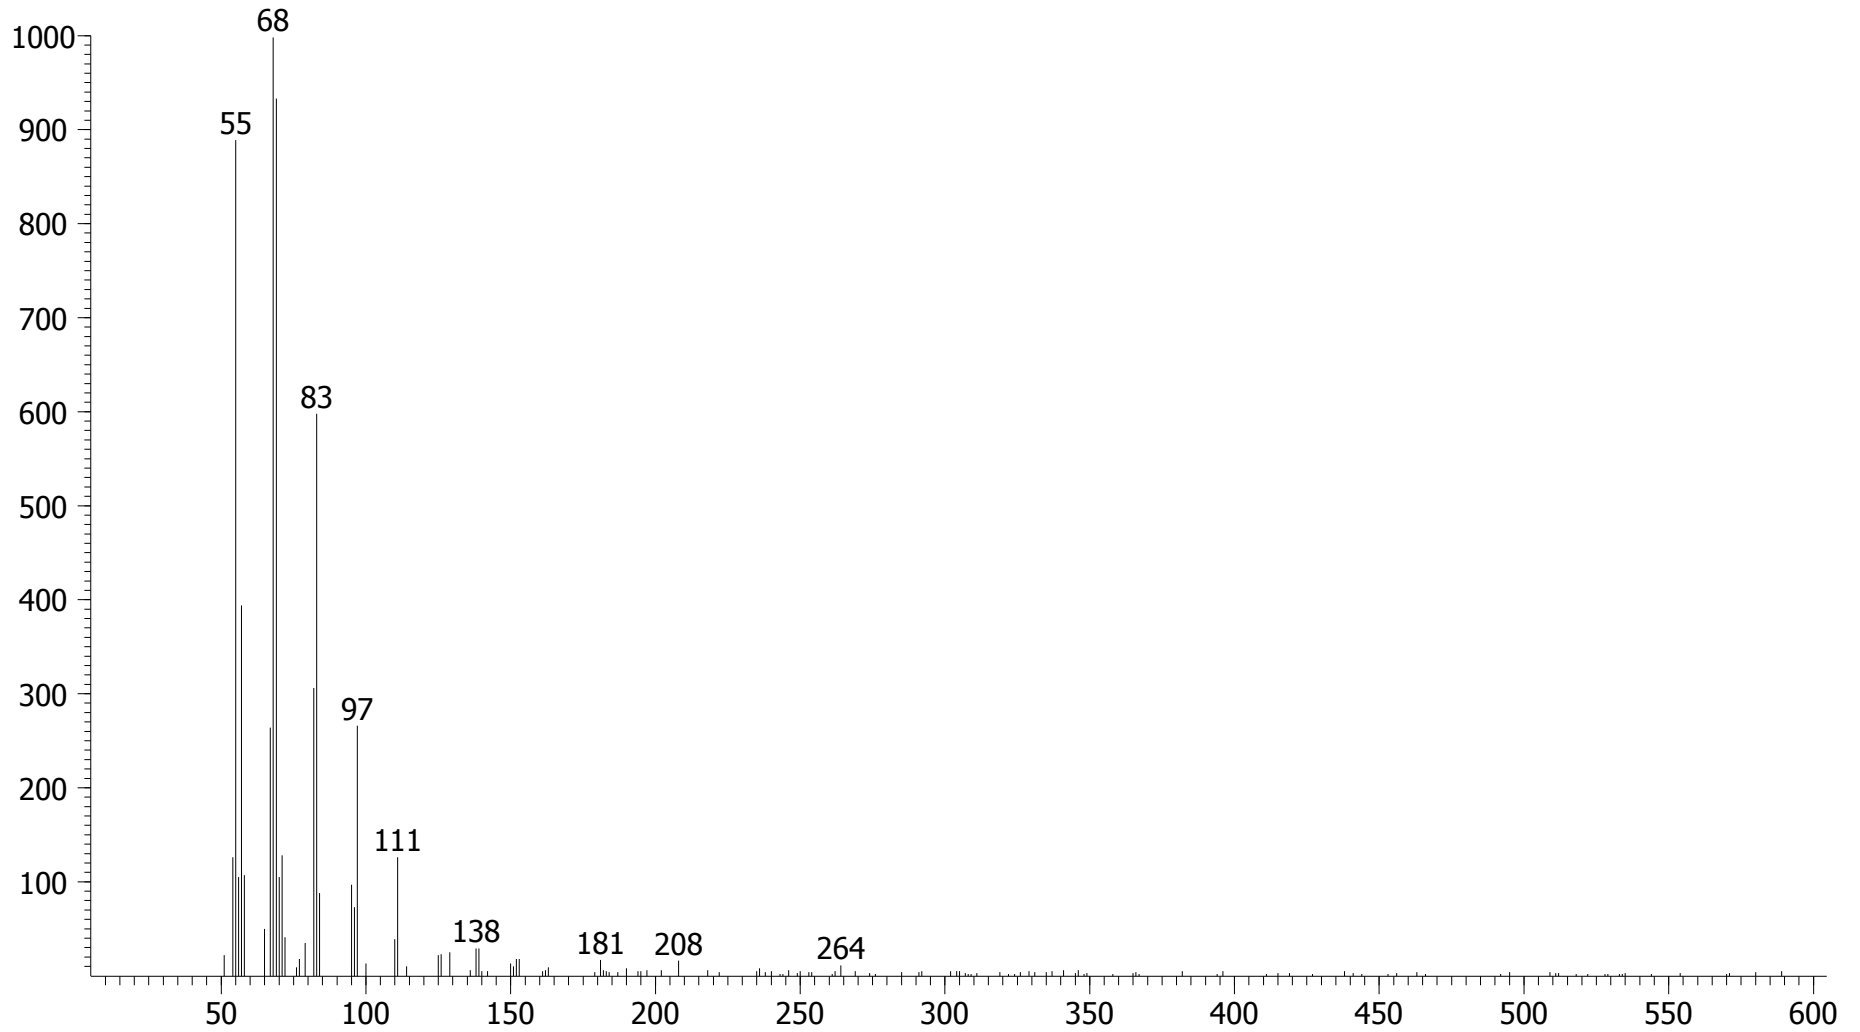

1st Dimension R.T. = 3533.75  
2nd Dimension R.T. = 0.904  
Quant Mass(es) = 403  
S/N = 17.864  
Area = 1445.1  
Height = 239.61  
Similarity = 609

Peak True - sample "AnMbr B (20191120):1", peak 7620, at 3533.75 , 0.904 sec , sec (Spec # 462827)

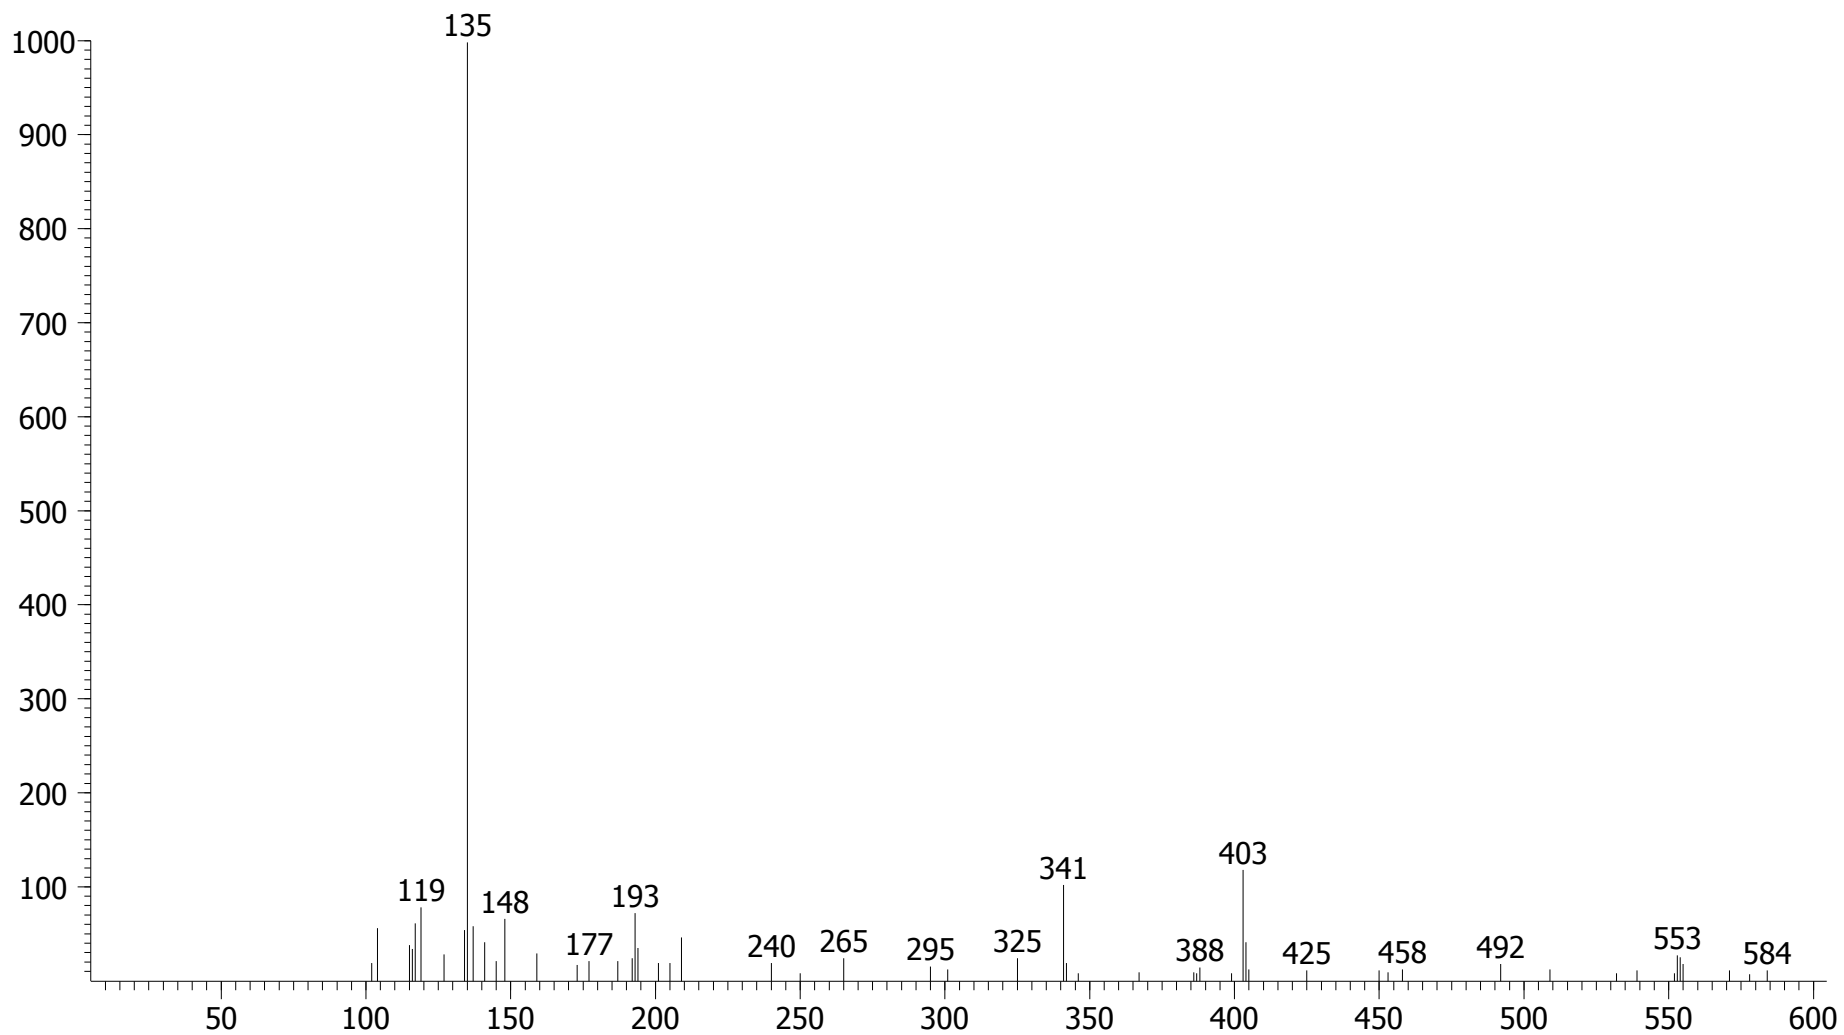

Supplement: ew3c00542_si_003.pdf [file ew3c00542_si_003.pdf]
