# Supplementary material for: Comparison of Trace Organic Chemical Removal Efficiencies between Aerobic and Anaerobic Membrane Bioreactors Treating Municipal Wastewater
Source: PubMed Central journal article supplement — ACS ES T Water. 2024 Mar 18;4(4):1381–92. doi: 10.1021/acsestwater.3c00542 (PMC11019542; doi:10.1021/acsestwater.3c00542), 2024-03-18
Supplement: ew3c00542_si_001.pdf [file ew3c00542_si_001.pdf]

## Supporting Information I

### Comparison of Trace Organic Chemical Removal Efficiencies between Aerobic and Anaerobic Membrane Bioreactors Treating Municipal Wastewater

*Jade L. Johnson<sup>†‡</sup>, Nathan G. Dodder<sup>†‡</sup>, Natalie Mladenov<sup>§\*</sup>, Lauren Steinberg<sup>§□</sup>, William Richardot<sup>‡</sup>, Eunha Hoh<sup>†\*</sup>*

<sup>†</sup> School of Public Health, San Diego State University, San Diego, California 92182 United States; <sup>‡</sup> San Diego State University Research Foundation, San Diego, California 92182 United States; <sup>§</sup> Department of Civil, Construction, and Environmental Engineering, San Diego State University, San Diego, California 92182, United States.

\*Corresponding author: Eunha Hoh (ehoh@sdsu.edu) and Natalie Mladenov (nmladenov@sdsu.edu)

## **Supporting Information Table of Contents Page**

Number of Pages: 50

|                                            |                |
|--------------------------------------------|----------------|
| <b>Principal Component Analysis</b>        | <b>S3</b>      |
| <b>Volatile Organic Compounds Analysis</b> | <b>S4</b>      |
| <b>List of Figures</b>                     | <b>S5</b>      |
| <b>List of Tables</b>                      | <b>S5-S6</b>   |
| <b>Additional Figures</b>                  | <b>S7-S9</b>   |
| <b>Additional Tables</b>                   | <b>S10-S49</b> |
| <b>References</b>                          | <b>S50</b>     |

## PRINCIPAL COMPONENT ANALYSIS

Principal component analysis (PCA) was conducted as a QSPR approach to determine if physical-chemical properties or molecular descriptors predicted percent change of the 351 tentatively identifiable compounds. Two groups of potential mechanistically significant descriptors were separately assessed: 1) 16 physical-chemical properties (listed in Table S20) and 2) 12 molecular descriptors (listed in Table S21). For the group 1 descriptors, the proportion of variance explained by principal component 1 (PC1) and principal component 2 (PC2) was 31% and 16%, respectively. Due to the low proportions of explained variance, PCA was unable to predict compound removal based on these physical-chemical properties. For the group 2 descriptors, the proportion of variance explained by PC1 and PC2 was 68% and 10%, respectively.

For the group 2 descriptors, we investigated one step further to evaluate the correlation of PC1 and percent removal, for the compounds that were removed and had a coefficient of variation less than 30%. Here, removal was defined as the percent decrease change in peak area before and after MBR treatment. All correlations between percent removal and PC1 across the experimental treatment cycles were found to be non-significant ( $p > 0.05$ , Figure S3).

Note in our prior study of centralized and decentralized WWTFs the compounds removed across all three WWTFs had significantly higher numbers of hydrogen bond acceptors-1, fraction of rotatable bonds, and number of atoms than the compounds that persisted.<sup>18</sup> In the present study, we additionally assessed these individual descriptors against percent removal using linear regression and no significant correlations were observed ( $p > 0.05$ ). The difference between study results may be due to the much greater number of compounds identified in our study, which may reduce spurious correlations.

In order to check if excluding the transformation products from the PCA would change the result, two additional principal component analyses were conducted in the same way except this time only on the removed compounds for each treatment type, specifically, 1) on the compounds removed by AeMBR and 2) on the compounds removed by AnMBR. First, PCA was conducted on the tentatively identified compounds ( $n=129$ ) removed by AeMBR in all three treatment cycles. The proportion of variance represented by principal component 1 (PC1) and PC2 for group 1 descriptors were PC1 = 34.3% and PC2 = 28.0%; and for group 2 descriptors were PC1= 67.3% and PC2= 11.7%. Then, PCA was run on the tentatively identified compounds ( $n=167$ ) removed by AnMBR in all three treatment cycles. The proportion of variance represented by PC1 and PC2 for group 1 descriptors were PC1 =33.9% and PC2 =24.2%; and for group 2 descriptors were PC1= 69.4% and PC2= 11.2%.

The results of the additional PCA analyses on only the compounds that were removed were very similar to the results that included all 351 tentatively identified compounds. In all cases for group 1 descriptors, PCA was unable to predict compound removal based on these physical-chemical properties due to the low proportions of explained variance. For each case examined for group 2 descriptors, PC1 and PC2 ranged from 67-69% and 10-12%, respectively. Although there was a greater degree of the proportion of variance explained for group 2, when further investigated, correlations between percent removal and PC1 were still found to be non-significant ( $p > 0.05$ ) across the three treatment cycles.

## VOLATILE ORGANIC COMPOUNDS

Volatilization can be one important removal pathway, especially for highly volatile compounds,<sup>1</sup> and it can be unrelated to the aerobic or anaerobic biological processes but related to the physical aeration in both the aeration and membrane tanks of the AeMBR system. In this experiment, rates of compound volatilization were expected to be the same in the membrane tanks because air and N<sub>2</sub> sparging rates were the same for both membranes. There was, however, greater opportunity for volatilization in the aeration tank of the AeMBR system, which was absent in the ABR of the AnMBR system. To evaluate the influence of volatilization on TOC removal in the AeMBR system, we compared the removal of 65 compounds that are considered volatile organic compounds (VOCs), defined as having a molecular weight less than 200 g/mol and a Henry's law constant greater than  $1 \times 10^{-5}$  atm-m<sup>3</sup>/mol,<sup>2</sup> in the AeMBR and AnMBR systems. We found that the average percent removal of VOCs (in terms of their individual peak abundances) was higher for AnMBR than AeMBR (46% and 14%, respectively), however the difference was not significant (student's t-test). Additionally, although there were a greater number of VOCs completely removed in the AeMBR treatment than in the AnMBR treatment (11 VOCs versus 6 VOCs, respectively), there were 18 VOCs that increased in average peak area in the AeMBR, from 15% up to 850% change. The AnMBR showed less of an increase for only 13 VOCs, which ranged from 1% to 113%. Therefore, we conclude that volatilization was not a major driving factor in the difference of losses observed between the AeMBR and AnMBR. It is important to note that in this study, the GC method including the injection method and GC oven temperature program detects volatile and semi-volatile compounds but does not cover highly volatile compounds, which requires a different GC method.

## LIST OF FIGURES

**Figure S1:** Aerobic (left) and anaerobic (right) membranes, before cleaning, after running two treatment cycles on 100% municipal wastewater.

**Figure S2:** Non-targeted data analysis flow chart. The selected chromatographic features and tentatively identified compounds are used for comparing AeMBR and AnMBR treatment of TOrCs.

**Figure S3:** Correlation of principal component 1 (x-axis), for group 2 descriptors, against percent removal (y-axis) for each treatment cycle (I, II, and III).

## LIST OF TABLES

**Table S1:** Table S1. Operating parameters of aerobic and anaerobic MBRs and average concentrations and % reduction of chemical oxygen demand and total suspended solids.

**Table S2:** Mean and relative standard deviations of total peak area and total number of peaks detected per sample type.

**Table S3:** Water quality data summary of averages over the three treatment cycles.

**Table S4:** GC×GC-TOF/MS instrument conditions for sample analysis.

**Table S5:** Number of chromatographic features per sample.

**Table S6:** Comparing mean number of chromatographic features using one-way ANOVA.

**Table S7:** Multiple comparisons of mean number of chromatographic features for influent and the membrane permeates, using Bonferroni-adjusted post hoc test.

**Table S8:** Comparing mean sum of the peak areas (normalized to the sample volume) for all chromatographic features per sample type using one-way ANOVA.

**Table S9:** Multiple comparisons of the mean sum of peak areas (normalized to the sample volume) for all chromatographic features per sample type, using Bonferroni-adjusted post hoc test.

**Table S10:** Data processing and statistical compare conditions.

**Table S11:** List of the 351 tentatively identifiable compounds, their normalized peak areas, and their average percent change in AeMBR and AnMBR systems.

**Table S12:** Description of the 15 selected compounds confirmed with their authentic standards.

**Table S13:** Comparison of the number of compounds treated at various efficiencies by AeMBR vs AnMBR.

**Table S14:** The 34 tentatively identifiable compounds that were commonly removed by aerobic and anaerobic membrane bioreactor treatment.

**Table S15:** The 21 tentatively identifiable compounds that were removed by AeMBR treatment and not AnMBR treatment.

**Table S16:** The 113 tentatively identified persistent compounds and potential transformation products. Persistent compounds were defined as compounds that had less than 90% percent peak area decrease from influent to membrane permeate.

**Table S17:** The 30 tentatively identified compounds unique to the aerobic membrane permeate samples.

**Table S18:** The 18 tentatively identifiable compounds unique to the anaerobic membrane permeate samples.

**Table S19:** Compounds confirmed with analytical standards and a comparison of their treatment efficiencies in Mladenov et al. (2021)<sup>3</sup> to the AeMBR and AnMBR.

**Table S20:** The 16 physicochemical properties assessed by principal component analysis.

**Table S21:** Twelve molecular descriptors assessed by principal component analysis.

**Table S22:** Database of all 102 tentatively identified compounds containing at least one nitrogen atom which were common among all the influents (from treatment cycle I, II, and III).

**Table S23:** Database of the 30 tentatively identified compounds containing at least one sulfur atom which were common among all the influents (from treatment cycle I, II, and III).

**Table S24:** Index of the EPA Comptox databases used to define each product use category.

**Table S25:** Sixty-five tentatively identifiable compounds identified in the United States (US) Environmental Protection Agency (EPA) High Production Volume List.

## ADDITIONAL FIGURES

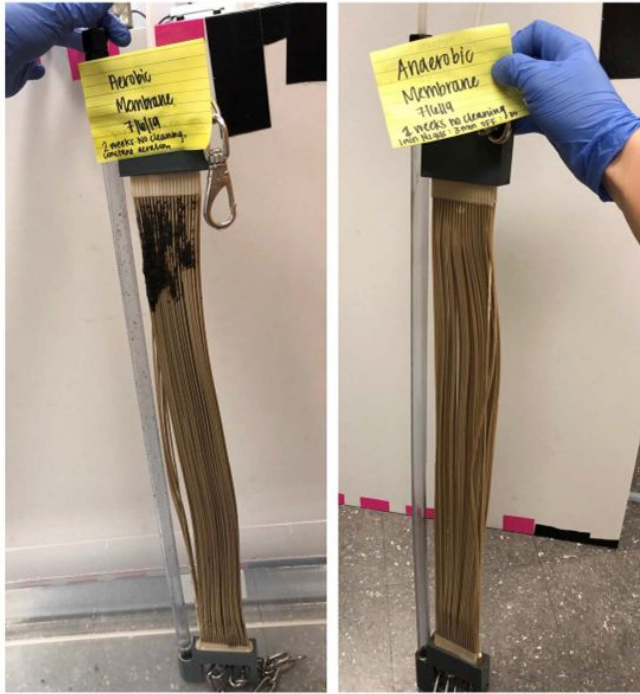

**Figure S1.** Aerobic (left) and anaerobic (right) membranes, before cleaning, after running two treatment cycles on 100% municipal wastewater.

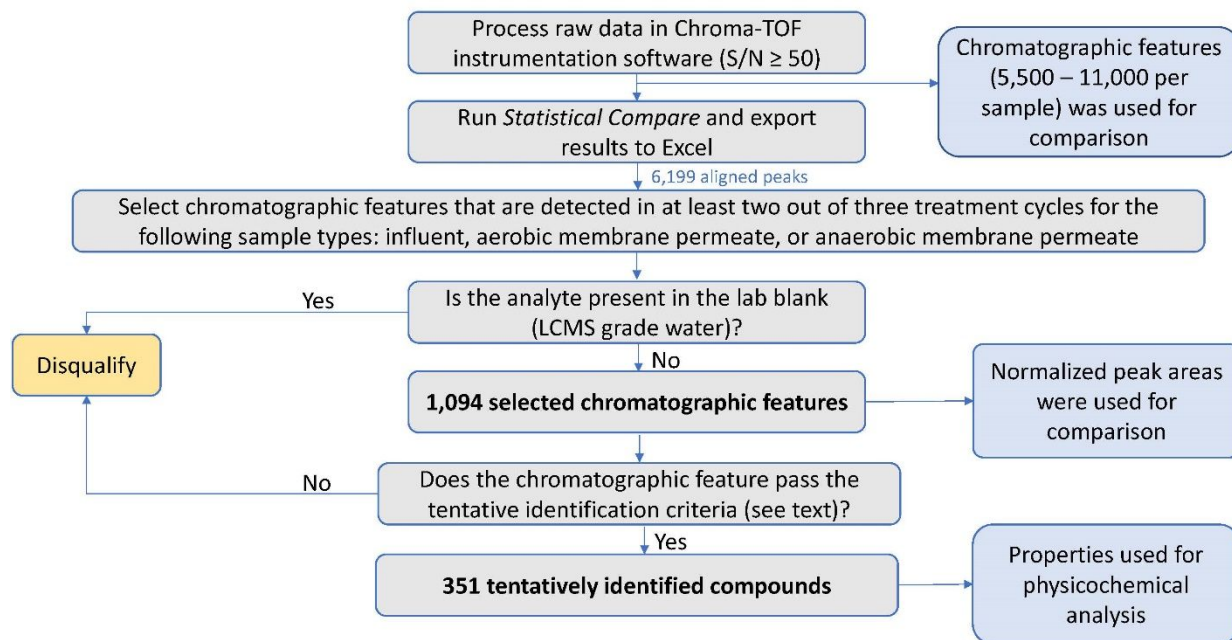

**Figure S2.** Non-targeted data analysis flow chart. The selected chromatographic features and tentatively identified compounds are used for comparing AeMBR and AnMBR treatment of TOrCs.



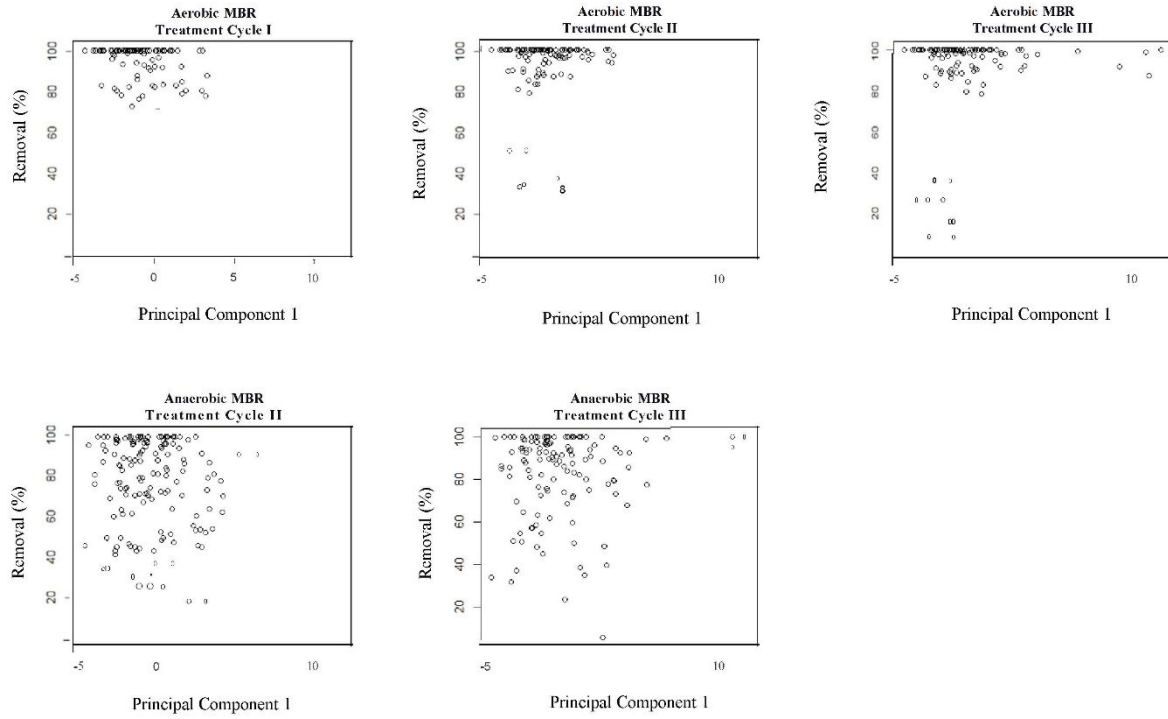

**Figure S3.** Correlation of principal component 1 (x-axis), for group 2 descriptors, against percent removal (y-axis) for each treatment cycle (I, II, and III).

## ADDITIONAL TABLES

**Table S1.** Operating parameters of aerobic and anaerobic MBRs and average concentrations and % reduction of chemical oxygen demand and total suspended solids.

| <b>Operating parameter/<br/>constituent</b>                  | <b>Untreated WW<br/>Influent (n=3)</b> | <b>Aerobic MBR (n=3)</b>          | <b>Anaerobic MBR (n=2)</b>        |
|--------------------------------------------------------------|----------------------------------------|-----------------------------------|-----------------------------------|
| Total suspended solids (TSS) of influent and permeate (mg/L) | 83 ± 16.0                              | 3 ± 2.8<br>(97 ± 2.7 % Removal)   | 8 ± 1.7<br>(89 ± 0.7 % Removal)   |
| Chemical oxygen demand of influent and permeate (mg/L)       | 358 ± 20.8                             | 42 ± 3.5<br>(88 ± 0.00 % Removal) | 65 ± 7.0<br>(83 ± 0.02 % Removal) |
| Solids retention time* in bioreactor (d)                     | -                                      | 3.97                              | ~960                              |
| Aerobic tank mixed liquor suspended solids (MLSS) (mg/L)     | -                                      | 1174 ± 855                        | -                                 |
| ABR sludge blanket TSS* (mg/L)                               | -                                      | -                                 | 1780 ± 1414                       |
| Flow rate (mL/min)                                           | -                                      | 30                                | 13.9                              |
| Hydraulic retention time (HRT) for bioreactors (h)           | -                                      | 24                                | 48                                |

**Note:** \* For the AnMBR, no wasting was needed due to low sludge production. Therefore, solid retention time is estimated based on a conservative value of 1L wasted per 30 d. Because the ABR does not have a mixed liquor the TSS concentration of the sludge blanket is given instead of a MLSS concentration.

**Table S2.** Mean and relative standard deviations of total peak area and total number of peaks detected per sample type.

| Sample Type | N    | Average Total Peak Area* | Standard Deviation of Total Peak Area | Relative Standard Deviation (RSD) of Total Peak Area | Average Total No. of Peaks* | Standard Deviation of Total No. of Peaks | Relative Standard Deviation (RSD) of Total No. of Peaks |
|-------------|------|--------------------------|---------------------------------------|------------------------------------------------------|-----------------------------|------------------------------------------|---------------------------------------------------------|
| Influent    | 3    | 9.60E+06                 | 2.00E+06                              | 21%                                                  | 10,009                      | 1,393                                    | 13.9 %                                                  |
| AeMBR       | 3    | 1.55E+06                 | 2.14E+05                              | 14%                                                  | 5,357                       | 421                                      | 7.9 %                                                   |
| AnMBR       | 3**  | 1.98E+06                 | 1.04E+06                              | 53%                                                  | 6,529                       | 2,865                                    | 43.9 %                                                  |
| AnMBR       | 2*** | 2.71E+06                 | 2.14E+05                              | 8%                                                   | 8,533                       | 730                                      | 8.56 %                                                  |

RSD = (100% × standard deviation) ÷ average.

\* Individual peak areas were normalized to the sample volume before calculating summing all peak areas to calculate the total peak area.

\*\* N=3, includes AnMBR samples from treatment cycle I, II, and III. N=2

\*\*\* N=2, includes AnMBR samples from treatment cycles II and III. Samples from treatment cycle I was excluded from TOrC removal analysis due to the substantially higher relative standard deviations and its mis-collection, given the sample was only collected for 24-hr as opposed to how the samples from treatment cycle II and III were collected for 48-hrs. The 24-hr composite sample is not representative of the entire process since the total hydraulic retention time of the AnMBR system is 48-hrs.

**Table S3.** Water quality data summary of averages over the three treatment cycles.

| Sample                             | n | pH          | Conductivity (mS) | TDS (ppt)   | Temperature (°C)   | DO (%)            | DO (mg/L)         | Turbidity (FAU) |
|------------------------------------|---|-------------|-------------------|-------------|--------------------|-------------------|-------------------|-----------------|
| Influent grab 1 (t=0 hr)           | 3 | 7.75 ± 0.13 | 3.08 ± 0.06       | 1.53 ± 0.04 | 23.27 ± 1.06       | 2.53 ± 0.38       | 0.22 ± 0.03       | 161.67 ± 46.46  |
| Influent grab 2 (t=24 hr)          | 3 | 7.49 ± 0.07 | 2.53 ± 0.01       | 1.27 ± 0.01 | 24.57 ± 1.37       | 2.40 ± 0.75       | 0.20 ± 0.06       | 249.67 ± 21.03  |
| Aerobic bioreactor effluent        | 6 | 7.72 ± 0.17 | 2.61 ± 0.31       | 1.30 ± 0.15 | 23.98 ± 0.64       | 64.35 ± 4.93      | 5.42 ± 0.47       | 56 ± 18.9       |
| Aerobic sludge                     | 3 | 7.55 ± 0.06 | 2.36 ± 0.27       | 1.18 ± 0.13 | 23.80 ± 1.56       | 64.15 ± 1.15      | 5.47 ± 0.09       | 69 ± 0          |
| Aerobic membrane tank              | 6 | 6.39 ± 0.74 | 2.65 ± 0.25       | 1.32 ± 0.15 | 24.6 (n=1)         | 89.6 (n=1)        | 7.45 (n=1)        | 5 ± 1           |
| Anaerobic baffled reactor effluent | 4 | 8.09 ± 0.09 | 2.34 ± 0.1        | 1.12 ± 0.07 | 24.00 ± 0.66       | 2 ± 0.27          | 0.17 ± 0.03       | 69 ± 0.66       |
| Anaerobic sludge                   | 2 | 7.78 ± 0.04 | 2.42 ± 0.29       | 1.19 ± 0.17 | 25.65 ± 1.25       | 2.17 ± 0.34       | 0.18 ± 0.03       | O.D. L          |
| Anaerobic membrane tank            | 6 | 8.81 ± 0.10 | 2.44 ± 0.07       | 1.22 ± 0.01 | 25.10 ± 0.50 (n=2) | 2.25 ± 0.45 (n=2) | 0.19 ± 0.04 (n=2) | 14.25 (n=2)     |

**Note:** “TDS” – total dissolved solids. “DO” – dissolved oxygen. “O.D.L.” - The value was over the detection limit.

**Table S4.** GC×GC/TOF-MS instrument conditions for sample analysis.

| GC×GC-TOF/MS Parameters      |                                                                             |
|------------------------------|-----------------------------------------------------------------------------|
| 1D Column                    | Rtx-5 (35 m x 0.25 mm x 0.25 μm)                                            |
| Maximum Temperature          | 350 °C                                                                      |
| 2D Column                    | Rtx-17 (0.79 m x 0.10 mm x 0.10 μm)                                         |
| Maximum Temperature          | 360 °C                                                                      |
| Injection Volume             | 2 μL                                                                        |
| Inlet Temperature            | 300 °C                                                                      |
| Carrier Gas Flow             | 1 mL/min (constant)                                                         |
| 1D Oven Program              | Initial Temp at 60 °C (1 min hold), 60°C to 300°C at 10°C/min (15 min hold) |
| 2D Oven Program              | Initial Temp at 80 °C (1 min hold), 80°C to 320°C at 10°C/min (15 min hold) |
| Modulator Temperature Offset | 10 °C                                                                       |
| Modulation Time              | 3.50 s                                                                      |
| Hot Pulse Time               | 0.90 s                                                                      |
| Cold Time                    | 0.85 s                                                                      |
| Transfer Line Temperature    | 300 °C                                                                      |
| Ion Source Temperature       | 250 °C                                                                      |
| Ionization                   | EI                                                                          |
| Electron Energy              | -70 eV                                                                      |
| Detector Voltage             | 1700                                                                        |
| Mass Range                   | 50-1000                                                                     |
| Scan Speed                   | 151.51 spectra/s                                                            |
| Total Run Time               | 2400 s                                                                      |

**Table S5.** Number of chromatographic features per sample.

| <b>Treatment Cycle</b> | <b>Sample Type</b>          | <b>Total Number of Chromatographic Features per Sample Type</b> | <b>Sample Volume</b> | <b>Composite description (hours)</b> |
|------------------------|-----------------------------|-----------------------------------------------------------------|----------------------|--------------------------------------|
| I                      | Influent                    | 8,461                                                           | 500                  | 48                                   |
| II                     | Influent                    | 10,407                                                          | 500                  | 48                                   |
| III                    | Influent                    | 11,160                                                          | 500                  | 48                                   |
| I                      | Aerobic Membrane Permeate   | 4,876                                                           | 1000                 | 24                                   |
| II                     | Aerobic Membrane Permeate   | 5,663                                                           | 1000                 | 24                                   |
| III                    | Aerobic Membrane Permeate   | 5,531                                                           | 1000                 | 24                                   |
| II                     | Anaerobic Membrane Permeate | 8,016                                                           | 1000                 | 48                                   |
| III                    | Anaerobic Membrane Permeate | 9,049                                                           | 1000                 | 48                                   |

**Table S6.** Comparing mean number of chromatographic features using one-way ANOVA.

|                | <b>Sum of Squares</b> | <b>df</b> | <b>Mean Square</b> | <b>F</b> | <b>Sig.</b> |
|----------------|-----------------------|-----------|--------------------|----------|-------------|
| Between Groups | 33553436.042          | 2         | 16776718.021       | 17.592   | .005        |
| Within Groups  | 4768325.833           | 5         | 953665.167         |          |             |
| Total          | 38321761.875          | 7         |                    |          |             |

**Table S7.** Multiple comparisons of mean number of chromatographic features for influent and the membrane permeates, using Bonferroni-adjusted post hoc test.

| <b>(I) id</b> | <b>(J) id</b> | <b>Mean Difference (I-J)</b> | <b>Std. Error</b> | <b>Sig.</b> | <b>95% Confidence Interval</b> |                    |
|---------------|---------------|------------------------------|-------------------|-------------|--------------------------------|--------------------|
|               |               |                              |                   |             | <b>Lower Bound</b>             | <b>Upper Bound</b> |
| INF           | AeMP          | 4652.667*                    | 797.356           | .006        | 1834.72                        | 7470.61            |
|               | AnMP          | 1476.833                     | 891.471           | .475        | -1673.72                       | 4627.39            |
| AeMP          | INF           | -4652.667*                   | 797.356           | .006        | -7470.61                       | -1834.72           |
|               | AnMP          | -3175.833*                   | 891.471           | .049        | -6326.39                       | -25.28             |
| AnMP          | INF           | -1476.833                    | 891.471           | .475        | -4627.39                       | 1673.72            |
|               | AeMP          | 3175.833*                    | 891.471           | .049        | 25.28                          | 6326.39            |

Note: “\*” - The mean difference is significant at the 0.05 level. INF = influent; AeMP = aerobic membrane permeate; AnMP = anaerobic membrane permeate

**Table S8.** Comparing mean sum of the peak areas (normalized to the sample volume) for all chromatographic features per sample type using one-way ANOVA.

|                | Sum of Squares      | df | Mean Square        | F      | Sig. |
|----------------|---------------------|----|--------------------|--------|------|
| Between Groups | 103204139537838.220 | 2  | 51602069768919.110 | 22.967 | .003 |
| Within Groups  | 11233737640860.906  | 5  | 2246747528172.181  |        |      |
| Total          | 114437877178699.120 | 7  |                    |        |      |

**Table S9.** Multiple comparisons of the mean sum of peak areas (normalized to the sample volume) for all chromatographic features per sample type, using Bonferroni-adjusted post hoc test.

| (I) samplotype | (J) samplotype | Mean Difference |              |       | 95% Confidence Interval |              |
|----------------|----------------|-----------------|--------------|-------|-------------------------|--------------|
|                |                | (I-J)           | Std. Error   | Sig.  | Lower Bound             | Upper Bound  |
| INF            | AeMP           | 7.82636E+006*   | 1.22386E+006 | .004  | 3.5011E+006             | 1.2152E+007  |
|                | AnMP           | 6.66106E+006*   | 1.36832E+006 | .014  | 1.8253E+006             | 1.1497E+007  |
| AeMP           | INF            | -7.82636E+006*  | 1.22386E+006 | .004  | -1.2152E+007            | -3.5011E+006 |
|                | AnMP           | -1.16530E+006   | 1.36832E+006 | 1.000 | -6.0011E+006            | 3.6705E+006  |
| AnMP           | INF            | -6.66106E+006*  | 1.36832E+006 | .014  | -1.1497E+007            | -1.8253E+006 |
|                | AeMP           | 1.16530E+006    | 1.36832E+006 | 1.000 | -3.6705E+006            | 6.0011E+006  |

**Note:** “\*” -The mean difference is significant at the 0.05 level. INF = influent; AeMP = aerobic membrane permeate; AnMP = anaerobic membrane permeate



**Table S10.** Data processing and statistical compare conditions.

| <b>Conditions</b>                                       | <b>Value</b> |
|---------------------------------------------------------|--------------|
| Data Processing:                                        |              |
| S/N                                                     | 50           |
| Statistical Compare:                                    |              |
| Analyte Similarity Required to Match (0-999)            | 600          |
| 1 <sup>st</sup> Dimension Retention Time Difference (s) | 7            |
| 2 <sup>nd</sup> Dimension Retention Time Difference (s) | 0.5          |
| Percent of Samples in Class Containing Analyte          | 50           |

**Table S11.** List of the 351 tentatively identifiable compounds, their normalized peak areas, and their average percent change in AeMBR and AnMBR systems.

| CAS No.    | Compound Name                           | Inf.- I   | Inf.- II  | Inf.- III | AeM P-I   | AeM P-II  | AeM P-III | AnM P-II  | AnM P-III  | AeM BR Avg. %C | AnM BR Avg. %C | R/P/TP/new TP |
|------------|-----------------------------------------|-----------|-----------|-----------|-----------|-----------|-----------|-----------|------------|----------------|----------------|---------------|
| 20189-42-8 | 1H-Pyrrole-2,5-dione, 3-ethyl-4-methyl- | 4.89 E-06 | 6.06 E-05 | 2.47 E-05 | 4.49 E-06 | 1.66 E-05 | 1.29 E-05 | 1.46 E-05 | 2.43 E-05  | -43%           | -39%           | P-both        |
| 99-92-3    | Acetophenone, 4'-amino-                 | 5.34 E-05 | 0.00 0287 | 0.00 0221 | 1.36 E-05 | 2.76 E-05 | 2.74 E-05 | 3.37 E-05 | 3.99 E-05  | -84%           | -85%           | P-both        |
| 7006-52-2  | Benzenamine, 3-chloro-N-methyl-         | 3.77 E-05 | 0.00 0222 | 1.14 E-05 | 0.00 0125 | 0.000 156 | 4.82 E-05 | 0.000 308 | 0.000 0392 | 175 %          | 141 %          | TP-both       |
| 499-75-2   | Phenol, 2-methyl-5-(1-methylethyl)-     | 0.00 1174 | 0.00 4711 | 0         | 2.74 E-05 | 4.39 E-05 | 0         | 0         | 0.001 156  | -98%           | 100 %          | R-both        |
| 270-91-7   | 5H-1-Pyridine                           | 0.00 8315 | 0.07 8582 | 0.04 532  | 0.00 0134 | 0.000 266 | 0.000 22  | 0.001 17  | 0.000 483  | -99%           | -99%           | R-both        |
| 5910-89-4  | Pyrazine, 2,3-dimethyl-                 | 6.18 E-05 | 2.84 E-05 | 0         | 6.84 E-05 | 0.000 119 | 0.000 118 | 4.59 E-05 | 5.84 E-05  | 663 %          | 62%            | TP-both       |
| 497-23-4   | 2(5H)-Furanone                          | 4.09 E-05 | 0.00 0183 | 0         | 6.61 E-05 | 0.000 177 | 0.000 156 | 6.13 E-05 | 8.55 E-05  | 29%            | -67%           | TP-Ae, P-An   |
| 1487-99-6  | Oxepine, 2,7-dimethyl-                  | 2.69 E-05 | 0.00 0103 | 0.00 0116 | 2.37 E-05 | 5.08 E-05 | 3.44 E-05 | 1.70 E-05 | 1.84 E-05  | -44%           | -84%           | P-both        |
| 5842-53-5  | 3-Penten-1-ol, 2,2,4-trimethyl-         | 4.94 E-05 | 0.00 0113 | 6.28 E-05 | 0.00 012  | 0.000 14  | 0.000 148 | 0.000 13  | 0.000 0912 | 101 %          | 30%            | TP-both       |
| 103-65-1   | Benzene, propyl-                        | 0.00 0137 | 0.00 0416 | 0.00 1824 | 0.00 0532 | 0.000 11  | 0.000 196 | 0.000 21  | 0.000 0722 | 42%            | -73%           | TP-Ae, P-An   |
| 4436-75-3  | 3-Hexene-2,5-dione                      | 0.00 0306 | 0.00 0676 | 0.00 0816 | 0.00 1433 | 0.002 039 | 0.002 136 | 0.001 143 | 0.000 989  | 244 %          | 45%            | TP-both       |
| 95-14-7    | 1H-Benzotriazole                        | 1.74 E-05 | 1.05 E-05 | 7.57 E-06 | 0.00 0251 | 0.000 237 | 0.000 231 | 2.56 E-05 | 1.92 E-05  | 2150 %         | 149 %          | TP-both       |
| 10264-55-8 | 3-Ethylcyclopentanone                   | 1.99 E-05 | 0.00 0164 | 4.73 E-05 | 5.00 E-05 | 3.44 E-05 | 0.000 149 | 4.19 E-05 | 1.89 E-04  | 96%            | 113 %          | TP-both       |
| 622-96-8   | Benzene, 1-ethyl-4-methyl-              | 0.00 0455 | 0.00 0936 | 0.00 1024 | 0.00 2317 | 0.000 507 | 0.000 785 | 0.000 909 | 0.000 337  | 113 %          | -35%           | TP-Ae, P-An   |
| 100-52-7   | Benzaldehyde                            | 0.00 0375 | 0.00 1043 | 0.00 1612 | 0.00 051  | 0.000 691 | 0.000 564 | 0.000 321 | 0.000 488  | -21%           | -69%           | P-both        |
| 3658-80-8  | Dimethyl trisulfide                     | 0.00 2289 | 0.01 6494 | 0.00 7594 | 4.81 E-05 | 0.000 205 | 0.000 168 | 0.000 309 | 0.000 122  | -98%           | -98%           | R-both        |
| 108-95-2   | Phenol                                  | 0         | 0.02 7408 | 0.00 8669 | 0.00 2466 | 0.000 489 | 0.000 59  | 0.001 151 | 0.001 622  | -96%           | -89%           | R-Ae, P-An    |
| 62-53-3    | Aniline                                 | 0.00 0895 | 0.00 2341 | 0.00 1505 | 0.00 0141 | 0.000 238 | 0.000 452 | 0.002 137 | 0.001 499  | -81%           | -5%            | P-both        |
| 100-47-0   | Benzonitrile                            | 2.67 E-05 | 0.00 0172 | 0.00 0138 | 6.99 E-05 | 8.57 E-05 | 4.71 E-05 | 5.27 E-05 | 9.64 E-05  | 15%            | -50%           | TP-Ae, P-An   |
| 695-98-7   | Pyridine, 2,3,5-trimethyl-              | 4.70 E-06 | 4.45 E-05 | 2.90 E-05 | 2.94 E-05 | 4.21 E-05 | 3.50 E-05 | 5.58 E-05 | 1.03 E-04  | 180 %          | 140 %          | TP-both       |
| 526-73-8   | Benzene, 1,2,3-trimethyl-, isomer 1     | 0.00 0307 | 0.00 0713 | 0.00 0495 | 0.00 1598 | 0.000 354 | 0.000 624 | 0.000 63  | 0.000 268  | 132 %          | -29%           | TP-Ae, P-An   |
| 541-73-1   | Benzene, 1,3-dichloro-                  | 2.56 E-05 | 5.06 E-05 | 3.17 E-05 | 5.67 E-05 | 7.44 E-05 | 2.13 E-05 | 6.37 E-05 | 9.65 E-06  | 45%            | -22%           | TP-Ae, P-An   |
| 527-84-4   | o-Cymene                                | 0.00 0163 | 0.00 04   | 0.00 1071 | 0.00 0125 | 7.72 E-05 | 7.72 E-05 | 8.23 E-05 | 7.78 E-05  | -66%           | -86%           | P-both        |
| 470-82-6   | Eucalyptol                              | 0.00 0343 | 0.00 1299 | 0.00 0794 | 5.26 E-06 | 0         | 7.46 E-06 | 0.000 365 | 0.000 159  | -99%           | -76%           | R-Ae, P-An    |
| 1193-79-9  | 2-Acetyl-5-methylfuran                  | 2.90 E-05 | 4.70 E-05 | 0.00 024  | 5.51 E-05 | 9.48 E-05 | 7.23 E-05 | 5.46 E-05 | 1.12 E-04  | 41%            | -19%           | TP-Ae, P-An   |

| CAS No.      | Compound Name                                           | Inf-I        | Inf-II       | Inf-III      | AeM P-I      | AeM P-II     | AeM P-III    | AnM P-II     | AnM P-III     | AeM BR Avg. %C | AnM BR Avg. %C | R/P/TP/new TP |
|--------------|---------------------------------------------------------|--------------|--------------|--------------|--------------|--------------|--------------|--------------|---------------|----------------|----------------|---------------|
| 766-39-2     | 2,5-Furandione, 3,4-dimethyl-                           | 4.25<br>E-06 | 2.37<br>E-05 | 3.64<br>E-05 | 8.22<br>E-05 | 0.000<br>157 | 9.14<br>E-05 | 1.60<br>E-05 | 4.23<br>E-05  | 849<br>%       | -8%            | TP-Ae, P-An   |
| 0-00-0       | 2,4,6-Cycloheptatrien-1-one, 4-methyl-                  | 8.15<br>E-05 | 0.00<br>0545 | 0            | 0.00<br>0116 | 0.000<br>212 | 0.000<br>171 | 0.000<br>114 | 0.000<br>154  | -9%            | -79%           | P-both        |
| 872-50-4     | 2-Pyrrolidinone, 1-methyl-                              | 1.60<br>E-05 | 0            | 2.51<br>E-05 | 7.40<br>E-05 | 9.45<br>E-05 | 3.15<br>E-05 | 0.000<br>115 | 0.000<br>0286 | 194<br>%       | 14%            | TP-both       |
| 6124-79-4    | 4-Methyl-5H-furan-2-one                                 | 1.36<br>E-05 | 5.03<br>E-05 | 0            | 7.26<br>E-05 | 0.000<br>109 | 8.68<br>E-05 | 2.53<br>E-05 | 4.75<br>E-05  | 275<br>%       | -50%           | TP-Ae, P-An   |
| 1193-18-6    | 2-Cyclohexen-1-one, 3-methyl-                           | 5.38<br>E-05 | 0.00<br>0252 | 0.00<br>0142 | 2.39<br>E-05 | 4.85<br>E-05 | 4.20<br>E-05 | 0.000<br>143 | 0.000<br>272  | -69%           | 24%            | P-Ae, TP-An   |
| 1072-83-9    | Ethanone, 1-(1H-pyrrol-2-yl)-                           | 6.76<br>E-05 | 0.00<br>0421 | 0            | 5.72<br>E-06 | 1.97<br>E-05 | 1.39<br>E-05 | 0.000<br>178 | 0.000<br>298  | -93%           | -58%           | R-Ae, P-An    |
| 93-53-8      | Benzeneacetaldehyde, $\alpha$ -methyl-                  | 1.66<br>E-05 | 0            | 4.81<br>E-05 | 6.92<br>E-05 | 1.61<br>E-05 | 2.54<br>E-05 | 3.44<br>E-05 | 1.95<br>E-05  | 135<br>%       | -59%           | TP-Ae, P-An   |
| 98-86-2      | Acetophenone                                            | 0.00<br>0323 | 0.00<br>0896 | 0.00<br>0966 | 0.00<br>0488 | 0.000<br>653 | 0.000<br>619 | 0.000<br>711 | 0.001<br>194  | -4%            | 1%             | P-Ae, TP-An   |
| 8/8/3-709    | 2(3H)-Furanone, dihydro-3,3-dimethyl-                   | 1.39<br>E-05 | 6.08<br>E-05 | 0            | 7.75<br>E-05 | 0.000<br>24  | 0.000<br>705 | 5.40<br>E-05 | 7.92<br>E-05  | 376<br>%       | -11%           | TP-Ae, P-An   |
| 616-45-5     | 2-Pyrrolidinone                                         | 3.20<br>E-05 | 0.00<br>0239 | 0.00<br>0205 | 9.17<br>E-05 | 0.000<br>128 | 0.000<br>178 | 5.59<br>E-05 | 3.11<br>E-05  | 42%            | -81%           | TP-Ae, P-An   |
| 1731-2-83-3  | Undecane, 5,7-dimethyl-                                 | 8.99<br>E-05 | 0.00<br>017  | 0.00<br>0183 | 0.00<br>0115 | 0.000<br>135 | 8.48<br>E-05 | 6.09<br>E-05 | 4.93<br>E-05  | -15%           | -69%           | P-both        |
| 100-53-8     | Benzenemethanethiol                                     | 0.00<br>0113 | 0.00<br>1277 | 0.00<br>2891 | 1.93<br>E-05 | 2.19<br>E-05 | 3.11<br>E-05 | 0.000<br>295 | 0.000<br>318  | -93%           | -83%           | R-Ae, P-An    |
| 90-05-1      | Phenol, 2-methoxy-                                      | 0.00<br>08   | 0.00<br>4861 | 0.00<br>3496 | 0.00<br>0163 | 0.000<br>251 | 0.000<br>371 | 3.45<br>E-05 | 7.74<br>E-05  | -88%           | -99%           | P-Ae, R-An    |
| 526-75-0     | Phenol, 2,3-dimethyl-                                   | 0            | 4.99<br>E-05 | 3.61<br>E-05 | 6.29<br>E-06 | 1.04<br>E-05 | 1.04<br>E-05 | 8.19<br>E-06 | 3.01<br>E-05  | -75%           | -50%           | P-both        |
| 1062-51-09-6 | 1H-Pyrazole, 4,5-dihydro-5,5-dimethyl-4-isopropylidene- | 2.91<br>E-05 | 0.00<br>0192 | 0.00<br>0248 | 4.24<br>E-05 | 0.000<br>107 | 0.000<br>117 | 0.000<br>104 | 0.000<br>257  | -17%           | -21%           | P-both        |
| 104-88-1     | Benzaldehyde, 4-chloro-                                 | 3.01<br>E-05 | 6.29<br>E-05 | 9.67<br>E-05 | 9.34<br>E-05 | 7.23<br>E-05 | 6.35<br>E-05 | 3.69<br>E-05 | 4.78<br>E-05  | 64%            | -46%           | TP-Ae, P-An   |
| 1046-8-64-1  | Benzene, 1-isocyano-2-methyl-                           | 8.45<br>E-05 | 0.00<br>0358 | 0.00<br>0277 | 3.21<br>E-06 | 1.03<br>E-05 | 9.43<br>E-06 | 1.10<br>E-05 | 1.91<br>E-05  | -97%           | -95%           | R-both        |
| 824-22-6     | 1H-Indene, 2,3-dihydro-4-methyl-                        | 4.06<br>E-05 | 9.70<br>E-06 | 3.24<br>E-05 | 4.34<br>E-05 | 1.10<br>E-05 | 2.14<br>E-05 | 1.36<br>E-05 | 1.29<br>E-05  | -5%            | -10%           | P-both        |
| 1125-21-9    | 2,6,6-Trimethyl-2-cyclohexene-1,4-dione                 | 0.00<br>0137 | 0.00<br>0678 | 0.00<br>05   | 0.00<br>0459 | 0.000<br>764 | 0.000<br>728 | 0.000<br>186 | 0.000<br>388  | 98%            | -47%           | TP-Ae, P-An   |
| 2374-7-48-0  | 5H-5-Methyl-6,7-dihydrocyclopentapyrazine               | 0            | 8.32<br>E-06 | 9.53<br>E-06 | 1.86<br>E-05 | 3.31<br>E-05 | 3.13<br>E-05 | 8.30<br>E-06 | 2.43<br>E-05  | 263<br>%       | 77%            | TP-both       |
| 2856-4-83-2  | 4H-Pyran-4-one, 2,3-dihydro-3,5-dihydroxy-6-methyl-     | 1.19<br>E-06 | 2.67<br>E-05 | 4.34<br>E-06 | 6.61<br>E-06 | 3.77<br>E-05 | 4.03<br>E-05 | 1.34<br>E-05 | 3.02<br>E-05  | 442<br>%       | 273<br>%       | TP-both       |
| 464-48-2     | Bicyclo[2.2.1]heptan-2-one, 1,7,7-trimethyl-, (1S)-     | 0.00<br>0402 | 0.00<br>1738 | 0            | 2.03<br>E-05 | 2.19<br>E-05 | 5.26<br>E-05 | 0.000<br>769 | 0.000<br>948  | -97%           | -56%           | R-Ae, P-An    |
| 622-76-4     | Benzene, 1-butynyl-                                     | 0.00<br>0222 | 0.00<br>1568 | 0.00<br>1321 | 4.91<br>E-05 | 7.83<br>E-05 | 7.56<br>E-05 | 0            | 0.002<br>237  | -89%           | -15%           | P-both        |
| 2054-7-99-3  | 1,4-Cyclohexanedione, 2,2,6-trimethyl-                  | 1.24<br>E-05 | 6.22<br>E-05 | 4.26<br>E-05 | 1.55<br>E-05 | 2.69<br>E-05 | 2.78<br>E-05 | 2.72<br>E-05 | 5.19<br>E-05  | -22%           | -17%           | P-both        |
| 1567-7-15-3  | Cycloprop[a]indene, 1,1a,6,6a-tetrahydro-               | 0.00<br>0177 | 1.79<br>E-05 | 4.52<br>E-05 | 0.00<br>0196 | 2.05<br>E-05 | 6.48<br>E-05 | 4.65<br>E-05 | 2.34<br>E-05  | 23%            | 56%            | TP-both       |
| 87-62-7      | 2,6-Xylidine                                            | 2.56<br>E-06 | 3.71<br>E-05 | 4.31<br>E-05 | 1.00<br>E-05 | 1.53<br>E-05 | 1.66<br>E-05 | 9.56<br>E-06 | 1.85<br>E-05  | 57%            | -66%           | TP-Ae, P-An   |
| 4748-78-1    | Benzaldehyde, 4-ethyl-                                  | 9.24<br>E-06 | 5.80<br>E-05 | 0            | 3.87<br>E-05 | 5.18<br>E-05 | 0.000<br>182 | 1.14<br>E-05 | 1.34<br>E-05  | 154<br>%       | -80%           | TP-Ae, P-An   |
| 1438-94-4    | 1H-Pyrrole, 1-(2-furanylmethyl)-                        | 1.08<br>E-05 | 4.92<br>E-05 | 0            | 2.04<br>E-05 | 3.65<br>E-05 | 4.43<br>E-05 | 1.96<br>E-05 | 2.62<br>E-05  | 32%            | -60%           | TP-Ae, P-An   |

| CAS No.     | Compound Name                                        | Inf-I        | Inf-II       | Inf-III      | AeM P-I      | AeM P-II     | AeM P-III    | AnM P-II     | AnM P-III     | AeM BR Avg. %C | AnM BR Avg. %C | R/P/TP/new TP |
|-------------|------------------------------------------------------|--------------|--------------|--------------|--------------|--------------|--------------|--------------|---------------|----------------|----------------|---------------|
| 0-00-0      | 4-Phenylbut-3-ene-1-yne                              | 0.00<br>0592 | 0.00<br>0329 | 0.00<br>0444 | 0.00<br>1078 | 0.000<br>29  | 0.000<br>338 | 0.000<br>309 | 0.000<br>304  | 15%            | -19%           | TP-Ae, P-An   |
| 101-48-4    | Benzene, (2,2-dimethoxyethyl)-                       | 9.90<br>E-05 | 0.00<br>0555 | 0.00<br>0374 | 8.44<br>E-05 | 0.000<br>123 | 9.38<br>E-05 | 0.000<br>316 | 0.000<br>706  | -56%           | 23%            | P-Ae, TP-An   |
| 2628-16-2   | Phenol, 4-ethenyl-, acetate                          | 0.00<br>0145 | 0.00<br>0433 | 0.00<br>0444 | 2.40<br>E-05 | 5.14<br>E-05 | 4.17<br>E-05 | 8.04<br>E-05 | 6.19<br>E-05  | -87%           | -84%           | P-both        |
| 95-16-9     | Benzothiazole                                        | 0.00<br>0159 | 0.00<br>0704 | 0.00<br>0599 | 0.00<br>0367 | 0.000<br>6   | 0.000<br>532 | 0.000<br>279 | 0.000<br>271  | 35%            | -58%           | TP-Ae, P-An   |
| 6485-40-1   | (-)-Carvone                                          | 0.00<br>0269 | 0.00<br>1395 | 0.00<br>0983 | 5.54<br>E-05 | 8.75<br>E-05 | 0.000<br>103 | 7.16<br>E-05 | 9.61<br>E-05  | -88%           | -93%           | P-Ae, R-An    |
| 77-67-8     | Ethosuximide                                         | 0.00<br>0244 | 6.09<br>E-05 | 0.00<br>0115 | 7.66<br>E-05 | 0.000<br>154 | 7.83<br>E-05 | 0.000<br>184 | 0.000<br>861  | 17%            | 425%           | TP-both       |
| 1/2/3-637   | Ethanone, 1-(3,4-dimethylphenyl)-                    | 1.27<br>E-05 | 5.11<br>E-05 | 6.37<br>E-05 | 3.85<br>E-05 | 4.75<br>E-05 | 0.000<br>129 | 1.67<br>E-05 | 2.44<br>E-05  | 100%           | -65%           | TP-Ae, P-An   |
| 5306-85-4   | D-Glucitol, 1,4:3,6-dianhydro-2,5-di-O-methyl-       | 0.00<br>1805 | 0.00<br>4064 | 0.00<br>0919 | 0.00<br>0758 | 0.005<br>274 | 0.005<br>561 | 0.005<br>817 | 0.004<br>26   | 159%           | 203%           | TP-both       |
| 1834-4-37-1 | Heptadecane, 2,6,10,14-tetramethyl-                  | 0.00<br>0113 | 0            | 0.00<br>0219 | 0.00<br>0115 | 0.000<br>202 | 0.000<br>115 | 8.43<br>E-05 | 2.83<br>E-05  | -23%           | -87%           | P-both        |
| 0-00-0      | Tricyclo[5.2.1.0(2,6)]dec-3-en-10-one                | 7.32<br>E-05 | 0.00<br>035  | 0.00<br>0357 | 2.95<br>E-05 | 5.81<br>E-05 | 0.000<br>137 | 0.000<br>334 | 0.001<br>537  | -68%           | 163%           | P-Ae, TP-An   |
| 5091-8-26-8 | Acetic acid, 2-(5-methyl-1,3,4-thiadiazol-2-ylthio)- | 1.96<br>E-06 | 4.57<br>E-06 | 0            | 0.00<br>0357 | 0.000<br>184 | 3.82<br>E-05 | 1.40<br>E-05 | 9.96<br>E-05  | 11020%         | 206%           | TP-both       |
| 4296-6-64-3 | 2-Pentanamine, N-ethyl-4-methyl-                     | 1.82<br>E-05 | 0.00<br>0569 | 0.00<br>0333 | 0.00<br>05   | 0.000<br>449 | 0.000<br>366 | 0.000<br>285 | 0.000<br>979  | 879%           | 72%            | TP-both       |
| 264-09-5    | Benzocycloheptatriene                                | 3.98<br>E-05 | 9.17<br>E-05 | 0.00<br>0104 | 7.79<br>E-05 | 5.70<br>E-05 | 4.32<br>E-05 | 6.02<br>E-05 | 5.71<br>E-05  | 0%             | -40%           | P-both        |
| 7786-61-0   | 2-Methoxy-4-vinylphenol                              | 0.00<br>0107 | 0.00<br>0623 | 0.00<br>054  | 7.64<br>E-05 | 0.000<br>177 | 0.000<br>112 | 1.72<br>E-05 | 4.03<br>E-05  | -60%           | -95%           | P-Ae, R-An    |
| 102-76-1    | Triacetin                                            | 0.00<br>0305 | 0.00<br>0132 | 5.64<br>E-05 | 0.00<br>044  | 0.001<br>633 | 0.000<br>153 | 0.000<br>705 | 0.000<br>0793 | 451%           | 237%           | TP-both       |
| 334-48-5    | n-Decanoic acid                                      | 0.00<br>0445 | 0            | 0.00<br>9361 | 0.00<br>0234 | 0.000<br>285 | 0.000<br>636 | 0.000<br>465 | 0             | -70%           | 100%           | P-Ae, R-An    |
| 87-41-2     | 1(3H)-Isobenzofuranone                               | 3.69<br>E-05 | 0.00<br>0199 | 0.00<br>0135 | 4.71<br>E-05 | 4.58<br>E-05 | 3.13<br>E-05 | 7.25<br>E-05 | 7.93<br>E-05  | -42%           | -52%           | P-both        |
| 123-08-0    | Benzaldehyde, 4-hydroxy-                             | 0.00<br>0307 | 0.00<br>0773 | 0.00<br>0802 | 5.61<br>E-05 | 7.17<br>E-05 | 6.44<br>E-05 | 0.000<br>112 | 0.000<br>0604 | -88%           | -89%           | P-both        |
| 4144-6-68-8 | 3-Tetradecene, (E)-                                  | 1.01<br>E-05 | 4.66<br>E-05 | 0            | 1.18<br>E-05 | 1.61<br>E-05 | 1.37<br>E-05 | 3.66<br>E-05 | 8.36<br>E-06  | -24%           | -21%           | P-both        |
| 5671-8-71-9 | 4-(2-Methoxyethyl)phenol                             | 0            | 0.00<br>0142 | 0.00<br>0157 | 2.35<br>E-05 | 1.89<br>E-05 | 1.41<br>E-05 | 0.000<br>105 | 0.000<br>263  | -89%           | 21%            | P-Ae, TP-An   |
| 88-04-0     | Chloroxylenol                                        | 0.00<br>0432 | 0.00<br>226  | 0.00<br>1833 | 2.75<br>E-05 | 5.11<br>E-05 | 7.12<br>E-05 | 0.000<br>509 | 0.000<br>962  | -96%           | -62%           | R-Ae, P-An    |
| 95-20-5     | 1H-Indole, 2-methyl-                                 | 0.00<br>2252 | 0.01<br>044  | 0.00<br>6282 | 2.29<br>E-05 | 6.20<br>E-05 | 7.02<br>E-05 | 0.000<br>121 | 0.000<br>172  | -99%           | -98%           | R-both        |
| 80-46-6     | Phenol, 4-(1,1-dimethylpropyl)-                      | 5.98<br>E-05 | 0.00<br>1584 | 0.00<br>0313 | 0.00<br>0725 | 6.42<br>E-05 | 2.71<br>E-05 | 0.001<br>869 | 0.004<br>599  | 308%           | 694%           | TP-both       |
| 121-71-1    | Ethanone, 1-(3-hydroxyphenyl)-                       | 0            | 0.00<br>0432 | 0.00<br>0326 | 2.75<br>E-05 | 4.43<br>E-05 | 3.71<br>E-05 | 4.74<br>E-05 | 1.35<br>E-04  | -89%           | -74%           | P-both        |
| 644-08-6    | 1,1'-Biphenyl, 4-methyl-                             | 0.00<br>0119 | 0.00<br>0175 | 0.00<br>0457 | 3.27<br>E-05 | 4.44<br>E-05 | 4.06<br>E-05 | 4.78<br>E-05 | 7.31<br>E-05  | -79%           | -78%           | P-both        |
| 614-60-8    | 2-Propenoic acid, 3-(2-hydroxyphenyl)-, (E)-         | 0.00<br>0123 | 0.00<br>0905 | 0.00<br>1095 | 8.18<br>E-06 | 2.08<br>E-05 | 1.85<br>E-05 | 2.69<br>E-05 | 8.26<br>E-05  | -96%           | -95%           | R-both        |
| 93-04-9     | Naphthalene, 2-methoxy-                              | 0.00<br>0142 | 0            | 0.00<br>1139 | 2.33<br>E-05 | 2.64<br>E-05 | 3.52<br>E-05 | 1.95<br>E-05 | 4.16<br>E-05  | -90%           | -96%           | R-both        |
| 128-37-0    | Butylated Hydroxytoluene                             | 0.00<br>0211 | 0.00<br>0693 | 0.00<br>0772 | 0.00<br>0149 | 0.000<br>153 | 0.000<br>148 | 0.000<br>274 | 0.000<br>0882 | -63%           | -75%           | P-both        |

| CAS No.    | Compound Name                                                              | Inf-I     | Inf-II    | Inf-III   | AeM P-I   | AeM P-II  | AeM P-III | AnM P-II  | AnM P-III  | AeM BR Avg. %C | AnM BR Avg. %C | R/P/TP/new TP |
|------------|----------------------------------------------------------------------------|-----------|-----------|-----------|-----------|-----------|-----------|-----------|------------|----------------|----------------|---------------|
| 7779-30-8  | 1-Penten-3-one, 1-(2,6,6-trimethyl-2-cyclohexen-1-yl)-                     | 5.04 E-05 | 0.00 0255 | 0.00 0212 | 5.66 E-05 | 0.000 127 | 0.000 115 | 3.88 E-05 | 1.03 E-04  | -28%           | -68%           | P-both        |
| 23676-09-7 | Benzoic acid, 4-ethoxy-, ethyl ester                                       | 0.00 0153 | 0.00 0831 | 0.00 0856 | 0.00 1976 | 0.001 169 | 0.001 305 | 0.001 606 | 0.000 558  | 428 %          | 29%            | TP-both       |
| 135-19-3   | 2-Naphthalenol                                                             | 1.02 E-05 | 8.84 E-05 | 0.00 0115 | 5.69 E-05 | 1.15 E-05 | 1.14 E-05 | 0.000 849 | 0.000 0317 | 94%            | 394 %          | TP-both       |
| 90-43-7    | o-Hydroxybiphenyl                                                          | 0.00 3863 | 0.00 1329 | 0.00 0265 | 0.00 0168 | 5.07 E-05 | 1.93 E-05 | 0.000 864 | 0.002 027  | -95%           | 315 %          | R-Ae, TP-An   |
| 14667-55-1 | Pyrazine, trimethyl-                                                       | 1.01 E-05 | 7.09 E-05 | 3.06 E-05 | 9.10 E-06 | 8.85 E-06 | 0         | 5.53 E-05 | 8.15 E-05  | -66%           | 72%            | P-Ae, TP-An   |
| 60142-96-3 | Gabapentin                                                                 | 4.93 E-06 | 4.06 E-05 | 2.33 E-05 | 9.71 E-05 | 0.000 126 | 0.000 137 | 2.09 E-05 | 8.38 E-05  | 856 %          | 106 %          | TP-both       |
| 29878-31-7 | 1H-Benzotriazole, 4-methyl-                                                | 3.72 E-05 | 0         | 5.71 E-05 | 5.96 E-05 | 5.65 E-05 | 4.09 E-05 | 4.33 E-05 | 1.05 E-04  | 16%            | 84%            | TP-both       |
| 84-66-2    | Diethyl Phthalate                                                          | 0.00 142  | 0.00 0882 | 0.00 8148 | 0.00 0224 | 0.000 585 | 0.000 423 | 0.002 146 | 0.001 623  | -71%           | 32%            | P-Ae, TP-An   |
| 119-61-9   | Benzophenone                                                               | 0.00 0494 | 0.00 2739 | 0.00 2003 | 0.00 1279 | 0.001 832 | 0.002 076 | 0.001 699 | 0.003 772  | 43%            | 25%            | TP-both       |
| 88-19-7    | Benzenesulfonamide, 2-methyl-                                              | 3.41 E-06 | 4.15 E-05 | 3.26 E-05 | 4.03 E-05 | 6.21 E-05 | 7.19 E-05 | 2.28 E-05 | 5.64 E-05  | 417 %          | 14%            | TP-both       |
| 77-93-0    | Triethyl citrate                                                           | 0.00 0685 | 0.00 0586 | 0.00 5373 | 0.00 072  | 0.001 514 | 0.001 643 | 0.000 482 | 0.000 344  | 31%            | -56%           | TP-Ae, P-An   |
| 1077-56-1  | Benzenesulfonamide, N-ethyl-2-methyl-                                      | 5.07 E-05 | 0.00 0451 | 0.00 0207 | 0.00 0221 | 0.000 309 | 0.000 376 | 0.000 214 | 0.000 433  | 129 %          | 28%            | TP-both       |
| 46048-64-0 | 2,7(1H,3H)-Naphthalenedione, hexahydro-                                    | 1.94 E-05 | 0.00 0141 | 1.22 E-05 | 5.40 E-05 | 0.000 106 | 6.70 E-05 | 4.09 E-05 | 8.22 E-05  | 201 %          | 251 %          | TP-both       |
| 70-55-3    | Benzenesulfonamide, 4-methyl-                                              | 2.17 E-06 | 2.96 E-05 | 2.93 E-05 | 2.83 E-05 | 5.10 E-05 | 6.64 E-05 | 1.64 E-05 | 4.39 E-05  | 468 %          | 3%             | TP-both       |
| 115-96-8   | Tri(2-chloroethyl) phosphate                                               | 4.02 E-05 | 0.00 0772 | 0.00 0249 | 0.00 0561 | 0.000 749 | 0.001 105 | 0.000 48  | 0.000 827  | 545 %          | 97%            | TP-both       |
| 1620-98-0  | 3,5-di-tert-Butyl-4-hydroxybenzaldehyde                                    | 4.14 E-05 | 0.00 0168 | 0.00 0132 | 7.54 E-05 | 0.000 121 | 9.73 E-05 | 9.04 E-05 | 6.83 E-05  | 9%             | -47%           | TP-Ae, P-An   |
| 120-51-4   | Benzyl Benzoate                                                            | 2.13 E-05 | 0.00 0142 | 0.00 0266 | 5.70 E-05 | 7.34 E-05 | 5.22 E-05 | 3.98 E-05 | 2.34 E-05  | 13%            | -82%           | TP-Ae, P-An   |
| 13674-84-5 | 2-Propanol, 1-chloro-, phosphate (3:1)                                     | 0.00 0257 | 0.00 1405 | 0.00 1068 | 0.00 0838 | 0.001 72  | 0.002 191 | 0.000 988 | 0.002 247  | 118 %          | 40%            | TP-both       |
| 85-01-8    | Phenanthrene                                                               | 7.13 E-05 | 0.00 0237 | 0.00 0263 | 0.00 0151 | 0.000 184 | 0.000 147 | 0.000 178 | 0.000 134  | 15%            | -37%           | TP-Ae, P-An   |
| 28705-96-6 | Carbamic acid, (3-chloro-4-hydroxyphenyl)-, 1-methylethyl ester            | 2.04 E-05 | 0.00 0123 | 5.14 E-05 | 1.41 E-05 | 2.10 E-05 | 1.01 E-05 | 4.41 E-05 | 9.32 E-05  | -65%           | 9%             | P-Ae, TP-An   |
| 104-66-5   | Benzene, 1,1'-[1,2-ethanediylbis(oxy)]bis-                                 | 1.34 E-06 | 1.02 E-05 | 6.62 E-06 | 1.45 E-06 | 1.50 E-06 | 1.14 E-06 | 2.42 E-06 | 3.99 E-06  | -53%           | -58%           | P-both        |
| 4534-50-3  | Benzene, (1-butylonyl)-                                                    | 3.65 E-05 | 0.00 0107 | 0         | 4.32 E-05 | 5.50 E-05 | 3.73 E-05 | 8.34 E-05 | 1.48 E-04  | -15%           | -22%           | P-both        |
| 260-94-6   | Acridine                                                                   | 9.26 E-06 | 2.35 E-05 | 4.27 E-05 | 6.26 E-05 | 0.000 109 | 4.75 E-05 | 1.13 E-05 | 4.42 E-05  | 317 %          | -24%           | TP-Ae, P-An   |
| 1196-69-6  | Indole-5-aldehyde                                                          | 5.18 E-05 | 0.00 0288 | 0.00 0155 | 8.67 E-06 | 4.79 E-05 | 4.10 E-06 | 1.13 E-05 | 1.18 E-05  | -88%           | -94%           | P-Ae, R-An    |
| 1222-05-5  | Cyclopenta[g]-2-benzopyran, 1,3,4,6,7,8-hexahydro-4,6,6',7,8,8-hexamethyl- | 0.00 0153 | 0.00 0838 | 0.00 1242 | 1.73 E-05 | 2.20 E-05 | 3.61 E-05 | 0.000 109 | 0.000 0684 | -94%           | -91%           | R-both        |
| 21145-77-7 | Tonalid                                                                    | 1.44 E-05 | 8.85 E-05 | 9.52 E-05 | 1.02 E-05 | 8.55 E-06 | 5.59 E-06 | 1.63 E-05 | 7.14 E-06  | -71%           | -87%           | P-both        |

| CAS No.     | Compound Name                                                   | Inf-I        | Inf-II       | Inf-III      | AeM P-I      | AeM P-II     | AeM P-III    | AnM P-II     | AnM P-III    | AeM BR Avg. %C | AnM BR Avg. %C | R/P/TP/new TP |
|-------------|-----------------------------------------------------------------|--------------|--------------|--------------|--------------|--------------|--------------|--------------|--------------|----------------|----------------|---------------|
| 3531-24-6   | 2-Propenenitrile, 3,3-diphenyl-                                 | 2.06<br>E-05 | 0.00<br>0152 | 7.55<br>E-05 | 4.52<br>E-05 | 0.000<br>157 | 0.000<br>576 | 7.36<br>E-05 | 1.34<br>E-04 | 262<br>%       | 13%            | TP-both       |
| 707-07-3    | Benzene, (trimethoxymethyl)-                                    | 1.56<br>E-05 | 4.00<br>E-05 | 3.12<br>E-05 | 4.12<br>E-05 | 5.26<br>E-05 | 6.15<br>E-05 | 2.63<br>E-05 | 4.24<br>E-05 | 98%            | 1%             | TP-both       |
| 1421-49-4   | Benzoic acid, 3,5-bis(1,1-dimethylethyl)-4-hydroxy-             | 0            | 6.69<br>E-06 | 2.89<br>E-06 | 0.00<br>0169 | 0.000<br>279 | 0.000<br>288 | 1.06<br>E-05 | 2.89<br>E-05 | 6968<br>%      | 479<br>%       | TP-both       |
| 728-40-5    | Bayer 28,589                                                    | 9.00<br>E-06 | 2.41<br>E-05 | 2.36<br>E-05 | 5.87<br>E-06 | 9.35<br>E-06 | 1.27<br>E-05 | 1.08<br>E-05 | 1.70<br>E-05 | -47%           | -42%           | P-both        |
| 8230-4-66-3 | 7,9-Di-tert-butyl-1-oxaspiro(4,5)deca-6,9-diene-2,8-dione       | 3.40<br>E-05 | 0.00<br>0133 | 0            | 0.00<br>0152 | 0.000<br>228 | 0.000<br>255 | 0.000<br>135 | 0.000<br>172 | 209<br>%       | 2%             | TP-both       |
| 3739-8-23-5 | Acetamide, N-[4-hydroxy-3-(methylthio)phenyl]-                  | 0.00<br>0195 | 0.00<br>1084 | 0.00<br>0597 | 3.05<br>E-05 | 3.04<br>E-05 | 1.91<br>E-05 | 3.77<br>E-05 | 7.43<br>E-05 | -93%           | -92%           | R-both        |
| 6386-38-5   | Benzenepropanoic acid, 3,5-bis(1,1-dimethylethyl)-4-            | 8.26<br>E-06 | 0            | 3.38<br>E-05 | 4.55<br>E-05 | 4.95<br>E-05 | 5.76<br>E-05 | 4.76<br>E-05 | 4.28<br>E-05 | 261<br>%       | 27%            | TP-both       |
| 7206-76-0   | Propanediamide, 2-ethyl-2-phenyl-                               | 8.97<br>E-06 | 1.55<br>E-05 | 3.96<br>E-05 | 4.36<br>E-05 | 4.14<br>E-05 | 0.000<br>117 | 7.21<br>E-06 | 4.62<br>E-05 | 250<br>%       | -18%           | TP-Ae, P-An   |
| 5559-1-05-4 | 1H-Indene-4-acetic acid, 6-(1,1-dimethylethyl)-2,3-dihydro-1,1- | 5.70<br>E-06 | 3.69<br>E-05 | 8.79<br>E-06 | 3.41<br>E-05 | 4.74<br>E-05 | 5.48<br>E-05 | 2.99<br>E-05 | 2.46<br>E-05 | 350<br>%       | 80%            | TP-both       |
| 606-28-0    | Benzoic acid, 2-benzoyl-, methyl ester                          | 5.50<br>E-05 | 0.00<br>0241 | 0.00<br>0231 | 0.00<br>0113 | 0.000<br>281 | 0.000<br>175 | 0.000<br>174 | 0.000<br>123 | 33%            | -37%           | TP-Ae, P-An   |
| 1340-1-18-8 | 2,4(1H,3H)-Pteridinedione, 1,3-dimethyl-                        | 0.00<br>0303 | 0.00<br>1832 | 0.00<br>1015 | 1.56<br>E-06 | 5.79<br>E-06 | 4.38<br>E-06 | 5.67<br>E-05 | 2.96<br>E-05 | 100<br>%       | -97%           | R-both        |
| 2017-0-32-5 | 3,5-di-tert-Butyl-4-hydroxyphenylpropionic acid                 | 1.05<br>E-05 | 8.23<br>E-05 | 4.20<br>E-05 | 0.00<br>0258 | 0.000<br>35  | 0.000<br>28  | 8.07<br>E-05 | 1.91<br>E-04 | 1083<br>%      | 176<br>%       | TP-both       |
| 613-73-0    | 1,2-Benzenediacetonitrile                                       | 2.81<br>E-05 | 8.92<br>E-05 | 5.83<br>E-05 | 9.40<br>E-05 | 0.000<br>125 | 0.000<br>101 | 5.06<br>E-05 | 1.22<br>E-04 | 116<br>%       | 33%            | TP-both       |
| 1648-9-90-0 | 6-Ethoxy-1,2,3,4-tetrahydro-2,2,4-trimethylquinoline            | 2.87<br>E-06 | 3.29<br>E-05 | 3.35<br>E-05 | 2.30<br>E-05 | 3.14<br>E-05 | 5.52<br>E-05 | 1.45<br>E-05 | 1.50<br>E-04 | 254<br>%       | 146<br>%       | TP-both       |
| 131-57-7    | Oxybenzone                                                      | 0.00<br>0164 | 0.00<br>2046 | 0.00<br>1796 | 2.99<br>E-05 | 4.98<br>E-05 | 3.41<br>E-05 | 3.23<br>E-05 | 7.12<br>E-05 | -92%           | -97%           | R-both        |
| 0-00-0      | Acridine-9-carbaldehyde                                         | 8.32<br>E-06 | 0            | 1.07<br>E-05 | 0.00<br>0571 | 0.000<br>33  | 0.000<br>235 | 8.70<br>E-06 | 3.80<br>E-05 | 4430<br>%      | 255<br>%       | TP-both       |
| 3380-34-5   | Triclosan                                                       | 3.06<br>E-05 | 0.00<br>0149 | 7.92<br>E-05 | 6.80<br>E-05 | 7.30<br>E-05 | 3.94<br>E-05 | 7.84<br>E-05 | 4.87<br>E-05 | 7%             | -43%           | TP-Ae, P-An   |
| 1/1/4-640   | Benzene, 4-chloro-1-(2,4-dichlorophenoxy)-2-methoxy-            | 1.90<br>E-05 | 6.88<br>E-05 | 2.49<br>E-05 | 6.09<br>E-05 | 5.88<br>E-05 | 4.08<br>E-05 | 6.52<br>E-05 | 1.74<br>E-05 | 90%            | -18%           | TP-Ae, P-An   |
| 3678-72-6   | Pyridine, 4-(diphenylmethyl)-                                   | 1.09<br>E-05 | 3.74<br>E-05 | 0.00<br>0157 | 2.36<br>E-05 | 8.96<br>E-06 | 4.03<br>E-05 | 1.95<br>E-05 | 2.71<br>E-05 | -11%           | -65%           | P-both        |
| 8638-6-73-4 | Fluconazole                                                     | 3.71<br>E-05 | 0.00<br>0132 | 7.05<br>E-05 | 0.00<br>0246 | 0.000<br>259 | 0.000<br>178 | 6.30<br>E-05 | 1.66<br>E-04 | 271<br>%       | 42%            | TP-both       |
| 7440-1-03-9 | 4-(2-(4-Formylphenyl)ethenyl)pyridine                           | 6.89<br>E-06 | 5.48<br>E-05 | 8.07<br>E-05 | 2.88<br>E-05 | 6.80<br>E-05 | 9.59<br>E-05 | 9.41<br>E-06 | 2.02<br>E-05 | 120<br>%       | -79%           | TP-Ae, P-An   |
| 2309-49-1   | 1,3,7,9-Tetramethyluric acid                                    | 7.90<br>E-06 | 4.34<br>E-05 | 4.27<br>E-05 | 1.40<br>E-05 | 7.84<br>E-06 | 6.43<br>E-06 | 2.31<br>E-05 | 4.57<br>E-05 | -30%           | -20%           | P-both        |
| 3337-4-28-6 | 1,2-Benzenedicarboxylic acid, 2-butoxyethyl butyl ester         | 4.23<br>E-05 | 0.00<br>0167 | 0            | 4.43<br>E-05 | 6.87<br>E-05 | 0.000<br>166 | 4.92<br>E-06 | 0.00<br>E+00 | -27%           | -97%           | P-Ae, R-An    |
| 125-33-7    | Primidone                                                       | 2.70<br>E-05 | 5.82<br>E-05 | 9.36<br>E-05 | 8.63<br>E-05 | 0.000<br>128 | 0.000<br>133 | 2.20<br>E-05 | 9.13<br>E-05 | 127<br>%       | -32%           | TP-Ae, P-An   |
| 78-43-3     | 1-Propanol, 2,3-dichloro-, phosphate (3:1)                      | 5.65<br>E-05 | 0.00<br>0289 | 0.00<br>0357 | 0.00<br>0124 | 0.000<br>194 | 0.000<br>298 | 0.000<br>123 | 0.000<br>254 | 23%            | -43%           | TP-Ae, P-An   |
| 1235-74-1   | Methyl dehydroabietate                                          | 4.14<br>E-06 | 1.78<br>E-05 | 2.58<br>E-05 | 3.72<br>E-06 | 5.52<br>E-06 | 4.25<br>E-06 | 5.98<br>E-06 | 5.85<br>E-06 | -54%           | -72%           | P-both        |

| CAS No.     | Compound Name                                                | Inf-I     | Inf-II    | Inf-III   | AeM P-I   | AeM P-II  | AeM P-III | AnM P-II  | AnM P-III  | AeM BR Avg. %C | AnM BR Avg. %C | R/P/TP/new TP |
|-------------|--------------------------------------------------------------|-----------|-----------|-----------|-----------|-----------|-----------|-----------|------------|----------------|----------------|---------------|
| 1552-1-04-7 | 2,6-Diphenyl-4-methyl-1,4-dihydropyridine-3,5-dicarbonitrile | 3.96 E-06 | 1.75 E-05 | 1.22 E-05 | 3.13 E-05 | 4.88 E-05 | 2.22 E-05 | 3.85 E-06 | 3.92 E-06  | 317 %          | -73%           | TP-Ae, P-An   |
| 103-23-1    | Hexanedioic acid, bis(2-ethylhexyl) ester                    | 0.00 0153 | 0.00 0565 | 0.00 0561 | 4.15 E-05 | 8.66 E-05 | 6.48 E-05 | 0.000 12  | 0.000 0287 | -82%           | -87%           | P-both        |
| 78-51-3     | Ethanol, 2-butoxy-, phosphate (3:1)                          | 0.00 0169 | 0.00 0389 | 0.00 02   | 2.16 E-05 | 1.69 E-05 | 1.48 E-05 | 0.000 192 | 0.000 387  | -92%           | 21%            | R-Ae, TP-An   |
| 298-46-4    | Carbamazepine                                                | 4.20 E-06 | 2.56 E-05 | 8.96 E-06 | 3.45 E-05 | 3.30 E-05 | 4.24 E-05 | 5.71 E-06 | 2.86 E-05  | 375 %          | 71%            | TP-both       |
| 115-86-6    | Triphenyl phosphate                                          | 2.69 E-06 | 1.60 E-05 | 1.47 E-05 | 2.72 E-06 | 2.57 E-06 | 2.16 E-06 | 2.75 E-06 | 7.59 E-06  | -56%           | -66%           | P-both        |
| 57-41-0     | Phenytoin                                                    | 3.75 E-06 | 2.30 E-05 | 1.76 E-05 | 2.66 E-05 | 3.52 E-05 | 3.09 E-05 | 7.88 E-06 | 2.70 E-05  | 246 %          | -6%            | TP-Ae, P-An   |
| 94-28-0     | Triethylene glycol di(2-ethylhexoate)                        | 1.70 E-05 | 3.51 E-05 | 0.00 0393 | 3.26 E-06 | 5.19 E-06 | 3.87 E-06 | 4.48 E-06 | 4.02 E-06  | -88%           | -93%           | P-Ae, R-An    |
| 5756-24-1   | Tetrasulfide, dimethyl                                       | 0.00 0289 | 0.00 6301 | 0.00 3875 | 0         | 7.42 E-06 | 2.58 E-06 | 0.000 137 | 0.000 204  | 100 %          | -96%           | R-both        |
| 1948-33-0   | t-Butylhydroquinone                                          | 0.00 0165 | 0.00 0872 | 0.00 0546 | 0         | 0.000 114 | 0.000 102 | 0.000 22  | 0.000 0714 | -89%           | -81%           | P-both        |
| 118-79-6    | Phenol, 2,4,6-tribromo-                                      | 0         | 3.41 E-06 | 5.44 E-06 | 0         | 4.36 E-06 | 6.55 E-06 | 1.87 E-06 | 1.92 E-06  | 24%            | -55%           | TP-Ae, P-An   |
| 83-67-0     | Theobromine                                                  | 5.08 E-05 | 0.00 0255 | 0.00 0727 | 0         | 3.78 E-06 | 4.48 E-06 | 3.09 E-05 | 2.76 E-05  | -99%           | -92%           | R-both        |
| 5434-0-85-1 | Benzene, 1-(2-butenyl)-2,3-dimethyl-                         | 1.83 E-05 | 0.00 0173 | 7.87 E-05 | 0         | 5.79 E-05 | 1.89 E-05 | 3.32 E-05 | 2.25 E-05  | -81%           | -76%           | P-both        |
| 3262-4-67-2 | 10,18-Bisnorabieta-8,11,13-triene                            | 2.42 E-06 | 3.08 E-05 | 0         | 0         | 5.45 E-06 | 1.59 E-06 | 2.37 E-06 | 1.71 E-06  | -91%           | -92%           | R-both        |
| 100-44-7    | Benzyl chloride                                              | 5.60 E-05 | 0         | 0.00 028  | 1.74 E-05 | 3.55 E-05 | 4.52 E-05 | 0.000 16  | 0.000 0827 | -76%           | -70%           | P-both        |
| 765-70-8    | 1,2-Cyclopentanedione, 3-methyl-                             | 3.07 E-05 | 0.00 0168 | 0.00 0106 | 1.15 E-05 | 1.67 E-05 | 1.24 E-05 | 0.000 109 | 0.000 0665 | -80%           | -36%           | P-both        |
| 1193-22-2   | 4-Amino-6-hydroxypyrimidine                                  | 9.04 E-06 | 3.69 E-05 | 3.03 E-05 | 2.36 E-05 | 4.01 E-05 | 4.04 E-05 | 2.42 E-05 | 2.07 E-05  | 68%            | -33%           | TP-Ae, P-An   |
| 617-94-7    | Benzenemethanol, $\alpha$ , $\alpha$ -dimethyl-              | 5.36 E-05 | 0.00 0316 | 0.00 0239 | 0.00 0247 | 0.000 273 | 0.000 135 | 0.000 302 | 0.000 495  | 101 %          | 51%            | TP-both       |
| 1367-9-74-8 | 2-Acetyl-5-methylthiophene                                   | 9.74 E-06 | 8.04 E-05 | 7.39 E-05 | 3.81 E-06 | 1.18 E-05 | 7.03 E-06 | 2.30 E-05 | 3.18 E-05  | -79%           | -64%           | P-both        |
| 119-65-3    | Isoquinoline                                                 | 1.38 E-05 | 8.82 E-05 | 5.29 E-05 | 2.52 E-05 | 3.54 E-05 | 3.88 E-05 | 4.27 E-05 | 4.88 E-05  | -1%            | -30%           | P-both        |
| 2149-4-57-5 | 1H-Pyrrole-2,5-dione, 3-ethenyl-4-methyl-                    | 0.00 0109 | 0.00 0592 | 0.00 0453 | 0.00 0192 | 0.000 387 | 0.000 269 | 0.000 171 | 0.000 301  | 0%             | -52%           | TP-Ae, P-An   |
| 5086-8-73-0 | 2-Methoxy-6-methylaniline                                    | 3.31 E-05 | 0.00 0185 | 0.00 014  | 3.17 E-05 | 9.29 E-05 | 6.20 E-05 | 7.71 E-05 | 1.19 E-04  | -37%           | -37%           | P-both        |
| 6574-97-6   | 2,3-Dichlorobenzonitrile                                     | 1.30 E-05 | 5.19 E-05 | 6.26 E-05 | 9.34 E-05 | 0.000 113 | 0.000 107 | 3.08 E-05 | 8.77 E-05  | 269 %          | 0%             | TP-Ae, P-An   |
| 2809-64-5   | Naphthalene, 1,2,3,4-tetrahydro-5-methyl-                    | 8.33 E-05 | 0.00 0144 | 0.00 0122 | 4.71 E-05 | 9.50 E-05 | 9.82 E-05 | 8.93 E-05 | 1.44 E-04  | -32%           | -10%           | P-both        |
| 2078-54-8   | Propofol                                                     | 9.40 E-05 | 0.00 0232 | 0.00 0167 | 0.00 012  | 6.97 E-05 | 2.84 E-05 | 0.000 167 | 0.000 526  | -42%           | 93%            | P-Ae, TP-An   |
| 88-06-2     | Phenol, 2,4,6-trichloro-                                     | 3.27 E-06 | 2.72 E-05 | 0         | 1.97 E-06 | 7.75 E-06 | 1.22 E-05 | 9.01 E-06 | 2.28 E-05  | -56%           | -67%           | P-both        |
| 643-79-8    | 1,2-Benzenedicarboxaldehyde                                  | 1.87 E-05 | 0.00 0114 | 4.59 E-05 | 7.34 E-06 | 1.22 E-05 | 7.20 E-06 | 2.95 E-05 | 8.70 E-05  | -78%           | 8%             | P-Ae, TP-An   |
| 492-86-4    | p-Chloromandelic acid                                        | 5.50 E-06 | 3.07 E-05 | 2.96 E-05 | 0         | 1.46 E-05 | 1.80 E-05 | 5.84 E-06 | 2.41 E-05  | -64%           | -50%           | P-both        |

| CAS No.      | Compound Name                                                 | Inf-I     | Inf-II    | Inf-III   | AeM P-I   | AeM P-II  | AeM P-III | AnM P-II  | AnM P-III | AeM BR Avg. %C | AnM BR Avg. %C | R/P/TP/new TP |
|--------------|---------------------------------------------------------------|-----------|-----------|-----------|-----------|-----------|-----------|-----------|-----------|----------------|----------------|---------------|
| 1039-6-80-2  | 2,6-Di-tert-butyl-4-hydroxy-4-methylcyclohexa-2,5-dien-1-one  | 7.90 E-05 | 0.00 034  | 0.00 0129 | 8.17 E-05 | 0.000 105 | 0.000 141 | 0.000 156 | 0.000 241 | -19%           | 16%            | P-Ae, TP-An   |
| 59-48-3      | 2H-Indol-2-one, 1,3-dihydro-                                  | 0.00 0341 | 0.00 1153 | 0.00 2349 | 0         | 3.80 E-05 | 4.84 E-05 | 0.000 447 | 0.000 142 | -98%           | -78%           | R-Ae, P-An    |
| 96-76-4      | 2,4-Di-tert-butylphenol                                       | 0.00 0329 | 0.00 0495 | 0.00 0288 | 0.00 0285 | 0.000 307 | 0.000 258 | 0.000 404 | 0.000 592 | -21%           | 44%            | P-Ae, TP-An   |
| 0-00-0       | Benzamide, 3-methyl-N-methyl-N-propyl-                        | 0         | 0.00 9149 | 0.00 3196 | 3.21 E-05 | 0.000 145 | 0.000 267 | 0.002 656 | 0.005 524 | -95%           | 1%             | R-Ae, TP-An   |
| 3971-1-79-0  | Cyclohexanecarboxamide, N-ethyl-5-methyl-2-(1-methylethyl)-   | 7.32 E-05 | 0.00 0452 | 0.00 0314 | 0.00 0413 | 0.000 558 | 0.000 622 | 0.000 21  | 0.000 554 | 195 %          | 11%            | TP-both       |
| 615-22-5     | 2-(Methylmercapto)benzothiazole                               | 5.59 E-05 | 0.00 0259 | 0.00 0218 | 0.00 0265 | 0.000 303 | 0.000 182 | 7.34 E-05 | 5.22 E-04 | 125 %          | 34%            | TP-both       |
| 122-40-7     | Cinnamaldehyde, à-pentyl-                                     | 0         | 7.38 E-06 | 4.05 E-05 | 9.48 E-07 | 0         | 4.55 E-06 | 3.15 E-05 | 3.82 E-05 | -94%           | 161 %          | R-Ae, TP-An   |
| 6066-49-5    | 3-Butylisobenzofuran-1(3H)-one                                | 5.28 E-05 | 0.00 0314 | 0.00 0338 | 4.53 E-05 | 6.86 E-05 | 6.16 E-05 | 8.48 E-05 | 1.69 E-04 | -58%           | -61%           | P-both        |
| 6957-19-3    | 2,3,6,7-Tetramethylquinoxaline                                | 1.86 E-06 | 1.11 E-05 | 0         | 1.21 E-05 | 1.76 E-05 | 2.74 E-05 | 1.28 E-05 | 6.37 E-05 | 305 %          | 15%            | TP-both       |
| 490-91-5     | Thymoquinone                                                  | 5.06 E-05 | 0.00 0536 | 0.00 0176 | 7.82 E-05 | 0.000 151 | 0.000 101 | 9.14 E-05 | 2.02 E-04 | -20%           | -34%           | P-both        |
| 1719-0-29-3  | Benzenepropanenitrile, à-hydroxy-                             | 4.07 E-05 | 0.00 0173 | 0.00 0158 | 3.09 E-05 | 5.27 E-05 | 8.31 E-05 | 4.20 E-05 | 1.23 E-04 | -47%           | -49%           | P-both        |
| 0-00-0       | 6-Methylenebicyclo[3.2.0]hept-3-en-2-one                      | 1.41 E-05 | 5.32 E-05 | 3.71 E-05 | 2.63 E-05 | 3.53 E-05 | 3.08 E-05 | 2.70 E-05 | 3.23 E-05 | 12%            | -31%           | TP-Ae, P-An   |
| 1689-64-1    | 9H-Fluoren-9-ol                                               | 0         | 5.57 E-05 | 4.24 E-05 | 1.40 E-05 | 1.33 E-05 | 2.49 E-05 | 1.89 E-05 | 6.50 E-05 | -59%           | -6%            | P-both        |
| 1518-05-12-8 | (1S,4S,9aS)-4-Allyl-1-ethyl-10,10-dihydroquinolizine          | 3.60 E-06 | 2.46 E-05 | 1.35 E-05 | 1.72 E-05 | 3.45 E-05 | 2.68 E-05 | 6.09 E-05 | 1.66 E-04 | 172 %          | 639 %          | TP-both       |
| 3550-21-8    | Benzhydryl isothiocyanate                                     | 2.69 E-05 | 0.00 016  | 7.15 E-05 | 8.15 E-05 | 0.000 198 | 0.000 273 | 0.000 139 | 0.000 339 | 170 %          | 181 %          | TP-both       |
| 118-23-0     | Amodryl                                                       | 0.00 0114 | 0         | 0.00 1152 | 0.00 0978 | 0.001 671 | 0.001 382 | 0.002 6   | 0.003 982 | 389 %          | 246 %          | TP-both       |
| 2581-2-30-0  | Gemfibrozil                                                   | 4.70 E-05 | 7.92 E-05 | 0.00 0291 | 8.63 E-06 | 4.53 E-06 | 2.70 E-05 | 2.44 E-05 | 3.98 E-04 | -89%           | -16%           | P-both        |
| 8990-2-28-3  | 2(5H)-Furanone, 4-methyl-3,5,5-tris(2-methyl-2-propenyl)-     | 2.12 E-05 | 0.00 0139 | 0.00 0114 | 0.00 011  | 0.000 176 | 0.000 226 | 6.37 E-05 | 1.90 E-04 | 181 %          | 6%             | TP-both       |
| 127-63-9     | Diphenyl sulfone                                              | 0.00 0118 | 0.00 0612 | 0.00 0554 | 0.00 036  | 0.000 631 | 0.000 73  | 0.000 299 | 0.000 688 | 80%            | -13%           | TP-Ae, P-An   |
| 486-16-8     | Carbinoxamine                                                 | 5.91 E-05 | 0.00 0547 | 0         | 0.00 0814 | 0.001 09  | 0.000 885 | 0.000 4   | 0.000 821 | 688 %          | -27%           | TP-Ae, P-An   |
| 0-00-0       | Norharmine, N-acetyl-                                         | 6.72 E-06 | 5.73 E-05 | 4.93 E-05 | 3.71 E-06 | 7.29 E-06 | 6.03 E-06 | 1.02 E-05 | 4.35 E-05 | -73%           | -47%           | P-both        |
| 2651-34-5    | 1-Phenanthrenecarboxylic acid, 1,2,3,4,4a,9,10,10a-octahydro- | 2.69 E-05 | 0.00 0128 | 0.00 0164 | 2.34 E-05 | 3.54 E-05 | 6.54 E-05 | 3.78 E-05 | 1.26 E-05 | -48%           | -81%           | P-both        |
| 80-05-7      | Phenol, 4,4'-(1-methylethylidene)bis-                         | 0.00 0117 | 0.00 0607 | 0.00 0546 | 2.30 E-05 | 2.87 E-05 | 6.88 E-06 | 0.000 278 | 0.000 703 | -91%           | -13%           | R-Ae, P-An    |
| 0-00-0       | Adipic acid, 2-decyl isobutyl ester                           | 5.14 E-06 | 1.66 E-05 | 1.80 E-05 | 1.84 E-05 | 5.95 E-05 | 2.88 E-05 | 1.30 E-05 | 7.01 E-06 | 192 %          | -41%           | TP-Ae, P-An   |
| 137-89-3     | 1,3-Benzenedicarboxylic acid, bis(2-ethylhexyl) ester         | 7.64 E-05 | 0.00 0238 | 0         | 9.48 E-05 | 6.20 E-05 | 5.12 E-05 | 8.57 E-05 | 5.35 E-05 | -25%           | -64%           | P-both        |
| 9590-6-11-9  | Tris(2,4-di-tert-butylphenyl) phosphate                       | 0.00 0661 | 0.00 2381 | 0         | 0.00 1536 | 0.001 755 | 0.001 226 | 0.000 628 | 0.000 821 | 53%            | -74%           | TP-Ae, P-An   |



| CAS No.      | Compound Name                                                 | Inf-I        | Inf-II       | Inf-III      | AeM P-I      | AeM P-II     | AeM P-III    | AnM P-II     | AnM P-III     | AeM BR Avg. %C | AnM BR Avg. %C | R/P/TP/new TP |
|--------------|---------------------------------------------------------------|--------------|--------------|--------------|--------------|--------------|--------------|--------------|---------------|----------------|----------------|---------------|
| 110-93-0     | 5-Hepten-2-one, 6-methyl-                                     | 2.53<br>E-05 | 0            | 5.17<br>E-05 | 6.52<br>E-06 | 1.89<br>E-05 | 1.98<br>E-05 | 5.06<br>E-05 | 5.18<br>E-05  | -68%           | 0%             | P-both        |
| 2445-93-4    | 2-Pentenoic acid, ethyl ester                                 | 5.76<br>E-05 | 3.95<br>E-05 | 0.00<br>0203 | 8.78<br>E-06 | 3.11<br>E-05 | 1.40<br>E-05 | 9.28<br>E-05 | 1.92<br>E-05  | -66%           | 22%            | P-Ae, TP-An   |
| 6452-49-9    | Benzene, 1-chloro-3-phenoxy-                                  | 4.19<br>E-06 | 2.12<br>E-05 | 1.05<br>E-05 | 1.10<br>E-05 | 1.33<br>E-05 | 6.29<br>E-06 | 2.94<br>E-05 | 2.94<br>E-06  | 28%            | -17%           | TP-Ae, P-An   |
| 873-94-9     | Cyclohexanone, 3,3,5-trimethyl-                               | 8.08<br>E-05 | 0.00<br>0706 | 0.00<br>0577 | 8.60<br>E-05 | 0.000<br>269 | 0.000<br>48  | 0.000<br>525 | 0.001<br>169  | -24%           | 38%            | P-Ae, TP-An   |
| 98-53-3      | Cyclohexanone, 4-(1,1-dimethylethyl)-                         | 6.48<br>E-05 | 0.00<br>0384 | 0.00<br>0348 | 5.09<br>E-06 | 1.06<br>E-05 | 4.89<br>E-05 | 0.000<br>12  | 0.000<br>803  | -92%           | 31%            | R-Ae, TP-An   |
| 7320-0-73-4  | 3-Phenylpyrazin-2-ol                                          | 2.43<br>E-05 | 0.00<br>0148 | 7.11<br>E-05 | 0.00<br>0117 | 0.000<br>163 | 8.22<br>E-05 | 0.000<br>111 | 0.000<br>293  | 136<br>%       | 144<br>%       | TP-both       |
| 7218-9-24-3  | 4-Hexen-2-one, 3-methyl-                                      | 4.46<br>E-06 | 3.68<br>E-05 | 1.44<br>E-05 | 5.13<br>E-06 | 5.52<br>E-06 | 0            | 5.15<br>E-06 | 5.31<br>E-06  | -57%           | -75%           | P-both        |
| 693-54-9     | 2-Decanone                                                    | 0.00<br>0483 | 0.00<br>2832 | 0.00<br>1797 | 3.54<br>E-05 | 2.39<br>E-05 | 0.000<br>133 | 0.000<br>32  | 0.000<br>108  | -95%           | -91%           | R-both        |
| 78-70-6      | Linalool                                                      | 0.00<br>0137 | 0.01<br>0573 | 0.00<br>7663 | 1.04<br>E-05 | 1.43<br>E-05 | 1.75<br>E-05 | 0.000<br>369 | 0.000<br>463  | -97%           | -95%           | R-both        |
| 2939-3-32-6  | 2(3H)-Furanone, 5-acetyldihydro-                              | 7.47<br>E-05 | 0.00<br>0439 | 0.00<br>0278 | 0.00<br>0161 | 0.000<br>355 | 0.000<br>218 | 6.09<br>E-05 | 3.35<br>E-05  | 25%            | -87%           | TP-Ae, P-An   |
| 4819-67-4    | Amyl cyclopentenone                                           | 4.00<br>E-05 | 0.00<br>0254 | 0.00<br>0168 | 1.35<br>E-05 | 3.33<br>E-05 | 2.59<br>E-05 | 4.21<br>E-05 | 4.67<br>E-05  | -79%           | -78%           | P-both        |
| 121-33-5     | Vanillin                                                      | 4.93<br>E-05 | 0.00<br>0552 | 0            | 4.37<br>E-05 | 0.000<br>195 | 4.46<br>E-05 | 2.34<br>E-05 | 3.11<br>E-05  | -38%           | -96%           | P-Ae, R-An    |
| 6505-0-80-8  | Pent-1-yn-3-ene, 4-methyl-3-phenyl-                           | 4.39<br>E-06 | 3.08<br>E-05 | 0            | 1.52<br>E-05 | 1.21<br>E-05 | 1.29<br>E-05 | 1.44<br>E-05 | 8.83<br>E-06  | 93%            | -53%           | TP-Ae, P-An   |
| 121-00-6     | 3-tert-Butyl-4-hydroxyanisole                                 | 3.10<br>E-05 | 0.00<br>0192 | 0.00<br>0152 | 3.95<br>E-05 | 7.58<br>E-05 | 4.53<br>E-05 | 2.97<br>E-05 | 6.12<br>E-05  | -34%           | -72%           | P-both        |
| 58-08-2      | Caffeine                                                      | 0.02<br>9485 | 0.13<br>9785 | 0.09<br>2725 | 5.22<br>E-05 | 0.000<br>136 | 0.000<br>308 | 0.002<br>834 | 0.009<br>916  | -<br>100<br>%  | -94%           | R-both        |
| 2854-40-2    | Cyclo(L-prolyl-L-valine)                                      | 0            | 0.00<br>0513 | 0.00<br>0353 | 2.99<br>E-06 | 3.88<br>E-06 | 0            | 1.05<br>E-05 | 2.30<br>E-05  | -<br>100<br>%  | -96%           | R-both        |
| 58-55-9      | Theophylline                                                  | 0.00<br>0129 | 0.00<br>0536 | 0.00<br>0279 | 1.69<br>E-05 | 3.62<br>E-05 | 2.79<br>E-05 | 4.24<br>E-05 | 6.79<br>E-05  | -90%           | -84%           | R-Ae, P-An    |
| 0-00-0       | Adipic acid, 3-heptyl isobutyl ester                          | 0.00<br>0113 | 0.00<br>0659 | 0.00<br>0455 | 0.00<br>0208 | 0.000<br>481 | 0.000<br>568 | 0.000<br>1   | 0.000<br>15   | 27%            | -76%           | TP-Ae, P-An   |
| 1/3/2-781    | 1,3,6-Trioxocane, 2-methyl-                                   | 2.47<br>E-05 | 6.98<br>E-05 | 7.13<br>E-05 | 3.13<br>E-05 | 2.74<br>E-05 | 0            | 1.81<br>E-05 | 0.00<br>E+00  | -45%           | -87%           | P-both        |
| 3777-69-3    | Furan, 2-pentyl-                                              | 0.00<br>0468 | 0.00<br>2634 | 0.00<br>3126 | 4.24<br>E-05 | 8.36<br>E-05 | 4.83<br>E-05 | 0.000<br>482 | 0.000<br>361  | -95%           | -85%           | R-Ae, P-An    |
| 1195-32-0    | Benzene, 1-methyl-4-(1-methylethenyl)-                        | 6.94<br>E-05 | 0.00<br>0178 | 0.00<br>0865 | 3.98<br>E-06 | 1.99<br>E-05 | 1.51<br>E-05 | 1.60<br>E-05 | 2.18<br>E-05  | -94%           | -94%           | R-both        |
| 122-00-9     | Ethanone, 1-(4-methylphenyl)-                                 | 7.82<br>E-05 | 0.00<br>0437 | 0.00<br>0548 | 3.12<br>E-05 | 5.15<br>E-05 | 4.86<br>E-05 | 0.000<br>127 | 0.000<br>248  | -80%           | -63%           | P-both        |
| 101-84-8     | Diphenyl ether                                                | 1.87<br>E-05 | 8.09<br>E-05 | 8.54<br>E-05 | 2.94<br>E-06 | 2.12<br>E-06 | 0            | 6.73<br>E-06 | 7.45<br>E-06  | -94%           | -91%           | R-both        |
| 6059-3-11-5  | S-(+)-5-(1-Hydroxy-1-methylethyl)-2-methyl-2-cyclohexen-1-one | 0.00<br>0113 | 0.00<br>0428 | 0.00<br>0418 | 8.29<br>E-06 | 1.24<br>E-05 | 1.18<br>E-05 | 5.08<br>E-05 | 1.10<br>E-04  | -96%           | -81%           | R-Ae, P-An    |
| 131-11-3     | Dimethyl phthalate                                            | 3.13<br>E-05 | 0            | 0.00<br>0217 | 1.49<br>E-05 | 3.22<br>E-05 | 3.07<br>E-05 | 3.78<br>E-05 | 2.84<br>E-05  | -69%           | -87%           | P-both        |
| 1149-33-28-7 | 3-Penten-2-one, 4-(2,6,6-trimethyl-2-cyclohexen-1-yl)-        | 0.00<br>0141 | 0.00<br>0786 | 0.00<br>0817 | 2.00<br>E-05 | 1.35<br>E-05 | 1.68<br>E-05 | 0.000<br>103 | 0.000<br>0765 | -94%           | -89%           | R-Ae, P-An    |
| 1490-1-07-6  | 3-Buten-2-one, 4-(2,6,6-trimethyl-1-cyclohexen-1-yl)-         | 2.67<br>E-05 | 0.00<br>0149 | 0.00<br>0163 | 4.22<br>E-06 | 4.79<br>E-06 | 8.05<br>E-06 | 8.30<br>E-06 | 1.75<br>E-05  | -92%           | -92%           | R-both        |

| CAS No.             | Compound Name                                                                        | Inf-I        | Inf-II       | Inf-III      | AeM P-I      | AeM P-II     | AeM P-III    | AnM P-II     | AnM P-III     | AeM BR Avg. %C | AnM BR Avg. %C | R/P/TP/new TP |
|---------------------|--------------------------------------------------------------------------------------|--------------|--------------|--------------|--------------|--------------|--------------|--------------|---------------|----------------|----------------|---------------|
| 1375<br>7-90-9      | 6,7-Dodecanedione                                                                    | 5.92<br>E-06 | 4.39<br>E-05 | 6.09<br>E-05 | 1.21<br>E-05 | 2.79<br>E-05 | 0            | 1.17<br>E-05 | 1.24<br>E-05  | -11%           | -76%           | P-both        |
| 50-<br>78-2         | Aspirin                                                                              | 2.62<br>E-05 | 0            | 0.00<br>0673 | 5.88<br>E-05 | 3.91<br>E-05 | 3.85<br>E-05 | 5.14<br>E-05 | 2.77<br>E-05  | 15%            | -96%           | TP-Ae, R-An   |
| 6938<br>-51-8       | 2-Octyl benzoate                                                                     | 4.39<br>E-05 | 0.00<br>0219 | 0.00<br>0382 | 6.22<br>E-05 | 6.45<br>E-05 | 5.07<br>E-05 | 8.19<br>E-05 | 5.43<br>E-05  | -39%           | -74%           | P-both        |
| 12/6/<br>4537       | Benzene, (1-propylheptyl)-                                                           | 4.55<br>E-05 | 0.00<br>0134 | 0.00<br>1311 | 2.07<br>E-05 | 3.04<br>E-05 | 2.69<br>E-05 | 8.49<br>E-05 | 1.45<br>E-04  | -77%           | -63%           | P-both        |
| 6803<br>9-35-0      | Ethanone, 1-(2,3,4,7,8,8a-hexahydro-3,6,8,8-tetramethyl-1H-3a,7-methanoazulen-5-yl)- | 7.96<br>E-06 | 5.09<br>E-05 | 5.85<br>E-05 | 1.64<br>E-06 | 3.22<br>E-06 | 4.27<br>E-06 | 1.05<br>E-05 | 1.21<br>E-05  | -89%           | -79%           | P-both        |
| 0-00-0              | Salicylic acid, 2-methylbutyl ether, 2-methylbutyl ester                             | 5.16<br>E-05 | 0.00<br>0642 | 0.00<br>187  | 2.36<br>E-05 | 2.61<br>E-05 | 2.09<br>E-05 | 6.40<br>E-05 | 2.13<br>E-05  | -83%           | -94%           | P-Ae, R-An    |
| 5466<br>-77-3       | 2-Propenoic acid, 3-(4-methoxyphenyl)-, 2-ethylhexyl ester                           | 3.08<br>E-05 | 0.00<br>0195 | 0.00<br>0521 | 2.67<br>E-06 | 6.78<br>E-06 | 3.27<br>E-06 | 1.69<br>E-05 | 4.17<br>E-06  | -96%           | -95%           | R-both        |
| 2038<br>4-05-8      | (S,E)-2,5-Dimethyl-4-vinylhexa-2,5-dien-1-yl acetate                                 | 3.84<br>E-05 | 2.94<br>E-05 | 6.73<br>E-05 | 5.83<br>E-05 | 1.83<br>E-05 | 3.27<br>E-05 | 2.90<br>E-05 | 3.34<br>E-05  | -12%           | -26%           | P-both        |
| 638-<br>53-9        | Tridecanoic acid                                                                     | 0.00<br>0419 | 0.00<br>0171 | 0            | 1.94<br>E-05 | 1.31<br>E-05 | 3.56<br>E-05 | 8.32<br>E-05 | 4.31<br>E-05  | -94%           | -51%           | R-Ae, P-An    |
| 91-<br>56-5         | 1H-Indole-2,3-dione                                                                  | 0.00<br>1297 | 0.00<br>0267 | 0.00<br>2678 | 0.00<br>012  | 0.000<br>153 | 9.36<br>E-05 | 0.000<br>189 | 0.000<br>127  | -77%           | -62%           | P-both        |
| 3251<br>-55-6       | 3-Methoxyparacetamol                                                                 | 0.00<br>0281 | 0.00<br>0349 | 0.00<br>0724 | 8.78<br>E-06 | 1.40<br>E-05 | 0            | 2.02<br>E-05 | 3.32<br>E-05  | -98%           | -95%           | R-both        |
| 526-<br>73-8        | Benzene, 1,2,3-trimethyl-, isomer 2                                                  | 1.20<br>E-05 | 2.22<br>E-05 | 0            | 4.63<br>E-05 | 8.57<br>E-06 | 1.83<br>E-05 | 2.16<br>E-05 | 6.95<br>E-06  | 112<br>%       | -3%            | TP-Ae, P-An   |
| 1378<br>88-<br>35-8 | Bis(3-chloro-1-propyl)(1-chloro-2-propyl)phosphate                                   | 7.56<br>E-06 | 4.39<br>E-05 | 4.48<br>E-05 | 2.50<br>E-05 | 5.25<br>E-05 | 5.62<br>E-05 | 2.71<br>E-05 | 5.93<br>E-05  | 92%            | -3%            | TP-Ae, P-An   |
| 106-<br>44-5        | p-Cresol                                                                             | 0            | 0.03<br>421  | 0.01<br>7279 | 0.00<br>1059 | 7.09<br>E-05 | 9.56<br>E-05 | 0.000<br>453 | 0.000<br>968  | 100<br>%       | -97%           | R-both        |
| 611-<br>74-5        | Benzamide, N,N-dimethyl-                                                             | 3.82<br>E-05 | 0.00<br>0131 | 0.00<br>0172 | 3.47<br>E-05 | 6.09<br>E-05 | 0.000<br>588 | 2.67<br>E-05 | 1.82<br>E-05  | 60%            | -85%           | TP-Ae, P-An   |
| 123-<br>56-8        | Succinimide                                                                          | 1.39<br>E-05 | 9.77<br>E-05 | 7.87<br>E-05 | 0.00<br>0168 | 8.87<br>E-05 | 0.000<br>123 | 1.84<br>E-05 | 1.06<br>E-05  | 385<br>%       | -84%           | TP-Ae, P-An   |
| 101-<br>86-0        | Octanal, 2-(phenylmethylene)-                                                        | 6.36<br>E-05 | 0.00<br>0374 | 0            | 3.84<br>E-05 | 3.08<br>E-05 | 4.05<br>E-05 | 0            | 0.000<br>15   | -66%           | 100<br>%       | P-Ae, R-An    |
| 1861<br>2-99-2      | 8,9-Dehydrothymol                                                                    | 4.42<br>E-06 | 5.00<br>E-05 | 7.04<br>E-06 | 6.12<br>E-06 | 0            | 6.39<br>E-06 | 1.42<br>E-05 | 3.71<br>E-05  | -24%           | 178<br>%       | P-Ae, TP-An   |
| 98-<br>82-8         | Benzene, (1-methylethyl)-                                                            | 0.00<br>0101 | 0.00<br>0292 | 0            | 0.00<br>0303 | 0.000<br>101 | 0.000<br>146 | 0.000<br>138 | 0.000<br>0833 | 67%            | -53%           | TP-Ae, P-An   |
| 496-<br>11-7        | Indane                                                                               | 0            | 3.43<br>E-05 | 4.73<br>E-05 | 7.10<br>E-05 | 2.67<br>E-05 | 5.12<br>E-05 | 3.40<br>E-05 | 1.97<br>E-05  | -7%            | -30%           | P-both        |
| 1971<br>5-19-6      | Benzoic acid, 3,5-bis(1,1-dimethylethyl)-2-hydroxy-                                  | 1.04<br>E-05 | 2.80<br>E-05 | 5.47<br>E-05 | 0.00<br>0163 | 0.000<br>351 | 0.000<br>51  | 1.97<br>E-05 | 3.31<br>E-05  | 1151<br>%      | -35%           | TP-Ae, P-An   |
| 2000<br>-43-3       | 2,2,2-Trichloro-1-phenylethanol                                                      | 0            | 0.00<br>0466 | 0.00<br>0346 | 6.35<br>E-05 | 0.000<br>143 | 4.19<br>E-05 | 0            | 0             | -79%           | 100<br>%       | P-Ae, R-An    |
| 1903<br>7-58-2      | Syringylacetone                                                                      | 1.03<br>E-05 | 0.00<br>0131 | 8.56<br>E-05 | 5.85<br>E-06 | 1.87<br>E-05 | 6.38<br>E-06 | 0            | 0             | -74%           | 100<br>%       | P-Ae, R-An    |
| 2033<br>-89-8       | Phenol, 3,4-dimethoxy-                                                               | 2.91<br>E-05 | 0.00<br>0122 | 0.00<br>0104 | 3.31<br>E-06 | 1.51<br>E-05 | 7.32<br>E-06 | 0            | 0             | -90%           | 100<br>%       | P-Ae, R-An    |

| CAS No.     | Compound Name                                    | Inf-I        | Inf-II       | Inf-III      | AeM P-I | AeM P-II | AeM P-III | AnM P-II     | AnM P-III    | AeM BR Avg. %C | AnM BR Avg. %C | R/P/TP/new TP |
|-------------|--------------------------------------------------|--------------|--------------|--------------|---------|----------|-----------|--------------|--------------|----------------|----------------|---------------|
| 5912-1-24-3 | Butanenitrile, 4-(methylthio)-                   | 0.00<br>0257 | 0.00<br>1271 | 0.00<br>0926 | 0       | 0        | 0         | 0.000<br>135 | 0.000<br>177 | -<br>100<br>%  | -85%           | R-Ae, P-An    |
| 931-20-4    | 2-Piperidinone, 1-methyl-                        | 1.50<br>E-06 | 1.90<br>E-05 | 0            | 0       | 0        | 0         | 1.30<br>E-05 | 6.37<br>E-06 | -<br>100<br>%  | -32%           | R-Ae, P-An    |
| 2405-0-09-7 | Thiazolidine, 2-ethyl-                           | 8.51<br>E-06 | 6.48<br>E-05 | 5.55<br>E-05 | 0       | 0        | 0         | 2.35<br>E-05 | 1.06<br>E-04 | -<br>100<br>%  | 14%            | R-Ae, TP-An   |
| 5354-7-60-7 | 6-Methyl-2-pyridinecarbaldehyde                  | 1.14<br>E-05 | 2.18<br>E-05 | 5.96<br>E-05 | 0       | 0        | 0         | 4.93<br>E-06 | 3.70<br>E-06 | -<br>100<br>%  | -86%           | R-Ae, P-An    |
| 122-99-6    | Ethanol, 2-phenoxy-                              | 0            | 0.00<br>0165 | 6.35<br>E-05 | 0       | 0        | 0         | 1.65<br>E-05 | 7.57<br>E-05 | -<br>100<br>%  | -35%           | R-Ae, P-An    |
| 501-94-0    | Benzeneethanol, 4-hydroxy-                       | 0.00<br>1527 | 0.00<br>8865 | 0.00<br>5575 | 0       | 0        | 0         | 9.11<br>E-05 | 1.79<br>E-04 | -<br>100<br>%  | -98%           | R-both        |
| 1677-27-6   | 3H-1,2-Benzodithiol-3-one                        | 7.21<br>E-05 | 0.00<br>0414 | 0.00<br>0811 | 0       | 0        | 0         | 3.70<br>E-05 | 4.38<br>E-05 | -<br>100<br>%  | -93%           | R-both        |
| 7661-55-4   | Quinoline, 5-methyl-                             | 2.57<br>E-05 | 0.00<br>0182 | 5.60<br>E-05 | 0       | 0        | 0         | 9.92<br>E-05 | 9.84<br>E-05 | -<br>100<br>%  | 15%            | R-Ae, TP-An   |
| 1723-3-71-5 | Hexathiepane                                     | 5.63<br>E-05 | 0.00<br>0622 | 0.00<br>0112 | 0       | 0        | 0         | 3.80<br>E-05 | 5.84<br>E-05 | -<br>100<br>%  | -71%           | R-Ae, P-An    |
| 611-59-6    | 1,7-Dimethylxanthine                             | 0.00<br>0165 | 0.00<br>3336 | 0.00<br>1882 | 0       | 0        | 0         | 1.79<br>E-05 | 3.24<br>E-05 | -<br>100<br>%  | -99%           | R-both        |
| 86-96-4     | 2,4(1H,3H)-Quinazolidione                        | 4.45<br>E-06 | 1.45<br>E-05 | 3.79<br>E-05 | 0       | 0        | 0         | 5.55<br>E-06 | 9.01<br>E-06 | -<br>100<br>%  | -69%           | R-Ae, P-An    |
| 0-00-0      | 1H-Tetrazole, 5-(1,5-dimethyl-1H-pyrrol-2-yl)-   | 3.11<br>E-05 | 0            | 5.23<br>E-05 | 0       | 0        | 0         | 3.50<br>E-05 | 4.40<br>E-05 | -<br>100<br>%  | -16%           | R-Ae, P-An    |
| 101-72-4    | 1,4-Benzenediamine, N-(1-methylethyl)-N'-phenyl- | 3.02<br>E-06 | 2.02<br>E-05 | 1.51<br>E-05 | 0       | 0        | 0         | 3.76<br>E-05 | 1.53<br>E-05 | -<br>100<br>%  | 44%            | R-Ae, TP-An   |
| 0-00-0      | Phthalazin-1(2H)-one, 2-ethenyl-                 | 1.59<br>E-05 | 0.00<br>0104 | 0            | 0       | 0        | 0         | 9.65<br>E-06 | 1.96<br>E-05 | -<br>100<br>%  | -91%           | R-both        |
| 1367-9-75-9 | 1-(2-Thienyl)-1-propanone                        | 5.08<br>E-06 | 3.53<br>E-05 | 3.09<br>E-05 | 0       | 0        | 0         | 1.09<br>E-05 | 3.83<br>E-05 | -<br>100<br>%  | -23%           | R-Ae, P-An    |
| 108-43-0    | Phenol, 3-chloro-                                | 3.98<br>E-05 | 0.00<br>0187 | 0.00<br>0142 | 0       | 0        | 0         | 9.40<br>E-05 | 6.96<br>E-05 | -<br>100<br>%  | -50%           | R-Ae, P-An    |
| 2219-73-0   | Phenol, 4-ethyl-2-methyl-                        | 5.42<br>E-06 | 2.20<br>E-05 | 1.82<br>E-05 | 0       | 0        | 0         | 2.27<br>E-05 | 5.39<br>E-05 | -<br>100<br>%  | 100<br>%       | R-Ae, TP-An   |
| 3502-9-03-9 | 1,3-Cyclopentanedione, 4-methyl-                 | 8.80<br>E-06 | 4.71<br>E-05 | 0            | 0       | 0        | 0         | 3.40<br>E-05 | 3.37<br>E-05 | -<br>100<br>%  | -28%           | R-Ae, P-An    |
| 6/7/5-257   | Formamide, N-(2-acetylphenyl)-                   | 8.05<br>E-05 | 0.00<br>0489 | 0.00<br>0218 | 0       | 0        | 0         | 0.000<br>231 | 0.000<br>209 | -<br>100<br>%  | -28%           | R-Ae, P-An    |
| 1037-5-96-9 | Benzene, 1,4-dimethyl-2,5-bis(1-methylethyl)-    | 0            | 2.39<br>E-05 | 1.57<br>E-05 | 0       | 0        | 0         | 1.72<br>E-05 | 8.92<br>E-06 | -<br>100<br>%  | -36%           | R-Ae, P-An    |
| 88-26-6     | 3,5-di-tert-Butyl-4-hydroxybenzyl alcohol        | 2.95<br>E-06 | 3.31<br>E-05 | 7.11<br>E-06 | 0       | 0        | 0         | 1.81<br>E-05 | 3.34<br>E-05 | -<br>100<br>%  | 162<br>%       | R-Ae, TP-An   |

| CAS No.      | Compound Name                                                   | Inf-I     | Inf-II    | Inf-III   | AeM P-I | AeM P-II | AeM P-III | AnM P-II  | AnM P-III  | AeM BR Avg. %C | AnM BR Avg. %C | R/P/TP/new TP |
|--------------|-----------------------------------------------------------------|-----------|-----------|-----------|---------|----------|-----------|-----------|------------|----------------|----------------|---------------|
| 92-69-3      | p-Hydroxybiphenyl                                               | 1.54 E-05 | 0.00 0152 | 3.97 E-05 | 0       | 0        | 0         | 0.000 122 | 0.000 0303 | - 100 %        | -22%           | R-Ae, P-An    |
| 5387 4-66-1  | Benzene, 1-(chloromethyl)-3-phenoxy-                            | 0         | 3.86 E-06 | 4.04 E-06 | 0       | 0        | 0         | 2.85 E-06 | 4.68 E-06  | - 100 %        | -5%            | R-Ae, P-An    |
| 0-00-0       | 3H-Cyclopenta[c]pyridazin-3-one, 2,5,6,7-tetrahydro-            | 0         | 9.77 E-06 | 7.73 E-06 | 0       | 0        | 0         | 3.88 E-06 | 1.17 E-05  | - 100 %        | -4%            | R-Ae, P-An    |
| 1761 9-36-2  | Trisulfide, methyl propyl                                       | 0         | 5.19 E-05 | 3.02 E-05 | 0       | 0        | 0         | 3.61 E-06 | 1.03 E-06  | - 100 %        | -95%           | R-both        |
| 877-65-6     | Benzenemethanol, 4-(1,1-dimethylethyl)-                         | 0         | 0.00 0118 | 9.11 E-05 | 0       | 0        | 0         | 6.05 E-06 | 2.87 E-05  | - 100 %        | -82%           | R-Ae, P-An    |
| 150-13-0     | 4-Aminobenzoic acid                                             | 3.73 E-06 | 3.78 E-05 | 1.35 E-05 | 0       | 0        | 0         | 2.02 E-05 | 2.27 E-05  | - 100 %        | 11%            | R-Ae, TP-An   |
| 3399 6-58-6  | Etiracetam                                                      | 7.41 E-05 | 0.00 0527 | 0.00 0272 | 0       | 0        | 0         | 0.000 293 | 0.000 227  | - 100 %        | -30%           | R-Ae, P-An    |
| 94-13-3      | Propylparaben                                                   | 0.00 0448 | 0.00 2652 | 0.00 2222 | 0       | 0        | 0         | 0.000 236 | 0.000 374  | - 100 %        | -87%           | R-Ae, P-An    |
| 131-56-6     | Methanone, (2,4-dihydroxyphenyl)phenyl-                         | 3.91 E-05 | 0.00 0697 | 0.00 0271 | 0       | 0        | 0         | 2.46 E-05 | 4.89 E-05  | - 100 %        | -89%           | R-Ae, P-An    |
| 288-26-6     | 3H-1,2-Dithiole                                                 | 0         | 7.95 E-06 | 1.14 E-05 | 0       | 0        | 0         | 4.31 E-06 | 7.54 E-06  | - 100 %        | -40%           | R-Ae, P-An    |
| 7210 -64-2   | 2(5H)-Thiophenone, 5-methyl-                                    | 4.17 E-06 | 2.64 E-05 | 2.29 E-05 | 0       | 0        | 0         | 3.31 E-06 | 3.29 E-06  | - 100 %        | -87%           | R-Ae, P-An    |
| 1166 64-30-3 | 5-Methyl-1,2,3,4-tetrathiane                                    | 4.41 E-05 | 0.00 0173 | 0.00 017  | 0       | 0        | 0         | 1.19 E-05 | 1.20 E-05  | - 100 %        | -93%           | R-both        |
| 4792 -78-3   | 2-(2-Hydroxyethoxy)phenol                                       | 0.00 0102 | 0.00 0417 | 0.00 0469 | 0       | 0        | 0         | 9.21 E-05 | 1.19 E-04  | - 100 %        | -76%           | R-Ae, P-An    |
| 93-35-6      | 7-Hydroxycoumarin                                               | 0.00 0105 | 0.00 0413 | 0.00 0585 | 0       | 0        | 0         | 1.36 E-05 | 6.32 E-05  | - 100 %        | -93%           | R-both        |
| 1453 44-72-5 | 2-(2',4',4',6',6',8',8'-Heptamethyltetrasiloxan-2'-yloxy)-2,    | 1.60 E-06 | 1.07 E-05 | 0.00 0206 | 0       | 0        | 0         | 3.60 E-06 | 1.03 E-06  | - 100 %        | -83%           | R-Ae, P-An    |
| 0-00-0       | 3-pyridinecarbonitrile, 2-amino-1,6-dihydro-1,4-dimethyl-6-oxo- | 1.32 E-05 | 2.63 E-05 | 2.66 E-05 | 0       | 0        | 0         | 6.40 E-06 | 1.49 E-05  | - 100 %        | -60%           | R-Ae, P-An    |
| 1436 -27-7   | 2,5-Piperazinedione, 3,6-bis(2-methylpropyl)-                   | 3.43 E-06 | 3.30 E-05 | 1.34 E-05 | 0       | 0        | 0         | 2.75 E-06 | 2.97 E-06  | - 100 %        | -85%           | R-Ae, P-An    |
| 2903 54-70-0 | Thiophene, 2-formyl-2,3-dihydro-                                | 2.27 E-06 | 3.82 E-05 | 7.49 E-06 | 0       | 0        | 0         | 0         | 0          | - 100 %        | - 100 %        | R-both        |
| 501-92-8     | Phenol, 4-(2-propenyl)-                                         | 2.62 E-05 | 7.38 E-05 | 0         | 0       | 0        | 0         | 0         | 0          | - 100 %        | - 100 %        | R-both        |
| 5663 0-95-6  | Bicyclo[3.3.1]nonan-2-one, 1-methyl-9-(1-methylethylidene)-     | 8.83 E-06 | 1.52 E-05 | 2.25 E-05 | 0       | 0        | 0         | 0         | 0          | - 100 %        | - 100 %        | R-both        |
| 108-46-3     | Resorcinol                                                      | 0.00 0189 | 0.00 0923 | 0.00 1139 | 0       | 0        | 0         | 0         | 0          | - 100 %        | - 100 %        | R-both        |

| CAS No.      | Compound Name                                                          | Inf-I     | Inf-II    | Inf-III   | AeM P-I   | AeM P-II  | AeM P-III | AnM P-II | AnM P-III | AeM BR Avg. %C | AnM BR Avg. %C | R/P/TP/new TP |
|--------------|------------------------------------------------------------------------|-----------|-----------|-----------|-----------|-----------|-----------|----------|-----------|----------------|----------------|---------------|
| 829-99-2     | Benzene, 1-heptenyl-                                                   | 2.96 E-06 | 4.85 E-05 | 0.00 0327 | 0         | 0         | 0         | 0        | 0         | 100 %          | 100 %          | R-both        |
| 1203-08-03   | 4-(2,6,6-Trimethylcyclohexa-1,3-dienyl)but-3-en-2-one                  | 5.38 E-06 | 1.49 E-05 | 1.80 E-05 | 0         | 0         | 0         | 0        | 0         | 100 %          | 100 %          | R-both        |
| 274-40-8     | Indolizine                                                             | 1.99 E-05 | 6.26 E-05 | 2.86 E-05 | 0         | 0         | 0         | 0        | 0         | 100 %          | 100 %          | R-both        |
| 2941-72-2    | Benzothiazole, 6-methoxy-2-methyl-                                     | 2.81 E-06 | 2.31 E-05 | 1.11 E-05 | 0         | 0         | 0         | 0        | 0         | 100 %          | 100 %          | R-both        |
| 489-84-9     | Azulene, 1,4-dimethyl-7-(1-methylethyl)-                               | 1.20 E-06 | 5.39 E-06 | 2.42 E-05 | 0         | 0         | 0         | 0        | 0         | 100 %          | 100 %          | R-both        |
| 1341-0-15-6  | 1H-2-Benzopyran-1-one, 3,4-dihydro-8-hydroxy-6-methoxy-3-methyl-, (R)- | 3.65 E-06 | 3.16 E-05 | 1.66 E-05 | 0         | 0         | 0         | 0        | 0         | 100 %          | 100 %          | R-both        |
| 5089-9-59-7  | Indole-2,3-dione, 1-(hydroxymethyl)-                                   | 4.41 E-06 | 2.60 E-05 | 8.09 E-05 | 0         | 0         | 0         | 0        | 0         | 100 %          | 100 %          | R-both        |
| 830-96-6     | 1H-Indole-3-propanoic acid                                             | 2.67 E-05 | 6.05 E-05 | 2.40 E-05 | 0         | 0         | 0         | 0        | 0         | 100 %          | 100 %          | R-both        |
| 5037-75-2    | 2,5-Piperazinedione, 3-(phenylmethyl)-                                 | 1.15 E-05 | 8.40 E-05 | 4.28 E-05 | 0         | 0         | 0         | 0        | 0         | 100 %          | 100 %          | R-both        |
| 1086-80-2    | Lumichrome                                                             | 1.21 E-06 | 1.58 E-05 | 4.89 E-05 | 0         | 0         | 0         | 0        | 0         | 100 %          | 100 %          | R-both        |
| 6445-1-76-9  | 2-(4-(But-2-yl)phenyl)propanoic acid                                   | 2.31 E-05 | 0         | 8.50 E-06 | 0         | 0         | 0         | 0        | 0         | 100 %          | 100 %          | R-both        |
| 5527-0-48-9  | 5-Ethoxy-2-methyl-pyridine                                             | 2.24 E-05 | 4.54 E-05 | 1.55 E-05 | 0         | 0         | 0         | 0        | 0         | 100 %          | 100 %          | R-both        |
| 2926-7-67-2  | 2-Methoxyresorcinol                                                    | 4.18 E-05 | 0.00 0301 | 8.29 E-06 | 0         | 0         | 0         | 0        | 0         | 100 %          | 100 %          | R-both        |
| 7277-7-88-9  | 7-Oxabicyclo[4.1.0]heptan-3-ol, 6-(3-hydroxy-1-butenyl)-1,5,5-         | 0         | 0.00 0118 | 6.08 E-05 | 0         | 0         | 0         | 0        | 0         | 100 %          | 100 %          | R-both        |
| 486-21-5     | Isofraxidin                                                            | 1.54 E-06 | 1.38 E-05 | 6.83 E-06 | 0         | 0         | 0         | 0        | 0         | 100 %          | 100 %          | R-both        |
| 1166-64-29-0 | 4-Methyl-1,2,3-trithiolane                                             | 4.61 E-06 | 2.05 E-05 | 2.04 E-05 | 0         | 0         | 0         | 0        | 0         | 100 %          | 100 %          | R-both        |
| 2871-5-26-6  | Benzofuran, 4,7-dimethyl-                                              | 9.82 E-06 | 4.58 E-05 | 0.00 0129 | 0         | 0         | 0         | 0        | 0         | 100 %          | 100 %          | R-both        |
| 0-00-0       | 5-Isopropenyl-2-methylcyclopent-1-enecarboxaldehyde                    | 2.24 E-05 | 4.14 E-05 | 0.00 0162 | 0         | 0         | 0         | 0        | 0         | 100 %          | 100 %          | R-both        |
| 4842-89-1    | 3-Pyridinol, 6-methyl-, acetate (ester)                                | 0         | 2.05 E-05 | 0.00 0503 | 0         | 0         | 0         | 0        | 0         | 100 %          | 100 %          | R-both        |
| 0-00-0       | 1,4-diazabicyclo[4.3.0]nonan-2,5-dione, 3-methyl                       | 9.00 E-06 | 5.79 E-05 | 0         | 0         | 0         | 0         | 0        | 0         | 100 %          | 100 %          | R-both        |
| 930-88-1     | N-Methylmaleimide                                                      | 0         | 0         | 0         | 1.49 E-05 | 1.46 E-05 | 8.30 E-06 | 0        | 0         | n/a            | n/a            | new TP-AeMBR  |

| CAS No.        | Compound Name                                                              | Inf-I | Inf-II | Inf-III | AeM P-I      | AeM P-II     | AeM P-III    | AnM P-II | AnM P-III | AeM BR Avg. %C | AnM BR Avg. %C | R/P/TP/new TP |
|----------------|----------------------------------------------------------------------------|-------|--------|---------|--------------|--------------|--------------|----------|-----------|----------------|----------------|---------------|
| 1465<br>7-22-8 | Silane, trimethyl-1,2-propadienyl-                                         | 0     | 0      | 0       | 0            | 2.56<br>E-05 | 1.61<br>E-05 | 0        | 0         | n/a            | n/a            | new TP-AeMBR  |
| 1635<br>-02-05 | 3-Hexen-2-one, 3,4-dimethyl-                                               | 0     | 0      | 0       | 7.74<br>E-06 | 6.03<br>E-06 | 6.57<br>E-06 | 0        | 0         | n/a            | n/a            | new TP-AeMBR  |
| 2949<br>-92-0  | S-Methyl methanethiosulphonate                                             | 0     | 0      | 0       | 1.21<br>E-05 | 8.96<br>E-06 | 1.02<br>E-05 | 0        | 0         | n/a            | n/a            | new TP-AeMBR  |
| 637-<br>88-7   | 1,4-Cyclohexanedione                                                       | 0     | 0      | 0       | 3.72<br>E-06 | 7.84<br>E-06 | 9.89<br>E-06 | 0        | 0         | n/a            | n/a            | new TP-AeMBR  |
| 4278<br>6-06-1 | 4H-1,2,4-Triazol-3-amine, 4-ethyl-                                         | 0     | 0      | 0       | 1.26<br>E-05 | 1.13<br>E-05 | 6.97<br>E-06 | 0        | 0         | n/a            | n/a            | new TP-AeMBR  |
| 1125<br>-11-7  | 1,3-Cyclohexanedione, 2,5,5-trimethyl-                                     | 0     | 0      | 0       | 3.48<br>E-05 | 2.65<br>E-05 | 0.000<br>142 | 0        | 0         | n/a            | n/a            | new TP-AeMBR  |
| 2145<br>0-56-6 | 1,2,3,4-Tetramethoxybenzene                                                | 0     | 0      | 0       | 7.49<br>E-06 | 1.39<br>E-05 | 1.49<br>E-05 | 0        | 0         | n/a            | n/a            | new TP-AeMBR  |
| 1008<br>-89-5  | Pyridine, 2-phenyl-                                                        | 0     | 0      | 0       | 3.16<br>E-06 | 3.76<br>E-06 | 4.68<br>E-06 | 0        | 0         | n/a            | n/a            | new TP-AeMBR  |
| 5509<br>2-18-7 | 2,7:3,6-Dimethano-2H-1-benzopyran, octahydro-                              | 0     | 0      | 0       | 1.31<br>E-05 | 1.94<br>E-05 | 1.48<br>E-05 | 0        | 0         | n/a            | n/a            | new TP-AeMBR  |
| 5510<br>3-64-5 | 2H-Benzocyclohepten-2-one, decahydro-4a-methyl-, trans-                    | 0     | 0      | 0       | 1.55<br>E-06 | 3.29<br>E-06 | 5.51<br>E-06 | 0        | 0         | n/a            | n/a            | new TP-AeMBR  |
| 3866<br>-16-8  | Benzene, 1-azido-3-methoxy-                                                | 0     | 0      | 0       | 0.00<br>0128 | 0.000<br>395 | 0.000<br>263 | 0        | 0         | n/a            | n/a            | new TP-AeMBR  |
| 5572<br>0-37-1 | Naphthalene, 1,3,7-trichloro-                                              | 0     | 0      | 0       | 7.53<br>E-06 | 5.42<br>E-05 | 0            | 0        | 0         | n/a            | n/a            | new TP-AeMBR  |
| 1010<br>3-06-7 | Naphthalene, 2,3-dimethoxy-                                                | 0     | 0      | 0       | 8.11<br>E-06 | 1.21<br>E-05 | 1.56<br>E-05 | 0        | 0         | n/a            | n/a            | new TP-AeMBR  |
| 3483<br>-18-9  | Sydnone, 3-(2-methylphenyl)-                                               | 0     | 0      | 0       | 5.16<br>E-06 | 7.48<br>E-06 | 6.95<br>E-06 | 0        | 0         | n/a            | n/a            | new TP-AeMBR  |
| 1403<br>5-34-8 | 2,6-Bis(1,1-dimethylethyl)-4-(1-oxopropyl)phenol                           | 0     | 0      | 0       | 2.73<br>E-05 | 7.39<br>E-05 | 5.36<br>E-05 | 0        | 0         | n/a            | n/a            | new TP-AeMBR  |
| 2251<br>8-27-0 | 4-(4-Chlorophenyl)-2-pyrrolidinone                                         | 0     | 0      | 0       | 5.22<br>E-06 | 3.14<br>E-05 | 2.46<br>E-05 | 0        | 0         | n/a            | n/a            | new TP-AeMBR  |
| 8492<br>2-05-4 | cis-1-(4-Isopropylphenyl)-3-(2-furyl)cyclopropane                          | 0     | 0      | 0       | 4.36<br>E-06 | 7.73<br>E-06 | 5.78<br>E-06 | 0        | 0         | n/a            | n/a            | new TP-AeMBR  |
| 3902<br>-71-4  | Trioxsalen                                                                 | 0     | 0      | 0       | 6.90<br>E-06 | 2.99<br>E-05 | 1.25<br>E-05 | 0        | 0         | n/a            | n/a            | new TP-AeMBR  |
| 484-<br>18-4   | Ethanone, 1-(7-hydroxy-5-methoxy-2,2-dimethyl-2H-1-benzopyran-8-yl)-       | 0     | 0      | 0       | 1.26<br>E-05 | 9.80<br>E-06 | 5.86<br>E-06 | 0        | 0         | n/a            | n/a            | new TP-AeMBR  |
| 9300<br>7-54-6 | 5-Isopropyl-3,8-dimethylazulene-1-carbonitrile                             | 0     | 0      | 0       | 4.77<br>E-06 | 1.11<br>E-05 | 4.62<br>E-06 | 0        | 0         | n/a            | n/a            | new TP-AeMBR  |
| 0117<br>-10-2  | Danthron                                                                   | 0     | 0      | 0       | 3.08<br>E-06 | 6.52<br>E-06 | 9.02<br>E-06 | 0        | 0         | n/a            | n/a            | new TP-AeMBR  |
| 2872<br>1-07-5 | Oxcarbapazine                                                              | 0     | 0      | 0       | 1.56<br>E-05 | 2.63<br>E-05 | 2.16<br>E-05 | 0        | 0         | n/a            | n/a            | new TP-AeMBR  |
| 2165<br>1-53-6 | (4aR,7S,7aS)-4,7-Dimethyl-5,6,7,7a-tetrahydrocyclopenta[c]pyran-1(4aH)-one | 0     | 0      | 0       | 3.83<br>E-06 | 5.06<br>E-06 | 1.60<br>E-05 | 0        | 0         | n/a            | n/a            | new TP-AeMBR  |

| CAS No.         | Compound Name                                     | Inf-I | Inf-II | Inf-III | AeM P-I      | AeM P-II     | AeM P-III    | AnM P-II     | AnM P-III    | AeM BR Avg. %C | AnM BR Avg. %C | R/P/TP/new TP |
|-----------------|---------------------------------------------------|-------|--------|---------|--------------|--------------|--------------|--------------|--------------|----------------|----------------|---------------|
| 6974<br>5-73-9  | 2-Cyclopenten-1-one, 4-hydroxy-2-methyl-3-phenyl- | 0     | 0      | 0       | 4.00<br>E-05 | 3.99<br>E-05 | 2.20<br>E-05 | 0            | 0            | n/a            | n/a            | new TP-AeMBR  |
| 6765<br>2-84-0  | 3,5-Octadiene, 4,5-diethyl-                       | 0     | 0      | 0       | 4.80<br>E-06 | 8.05<br>E-06 | 7.56<br>E-06 | 0            | 0            | n/a            | n/a            | new TP-AeMBR  |
| 3820<br>5-55-9  | 5-Acetyl-4-methylthiazole                         | 0     | 0      | 0       | 0.00<br>0192 | 0.000<br>258 | 0.000<br>168 | 0            | 0            | n/a            | n/a            | new TP-AeMBR  |
| 1085<br>62-69-2 | 2,1-Benzisoxazole, 7-ethyl-3-methyl-              | 0     | 0      | 0       | 3.99<br>E-06 | 9.77<br>E-06 | 8.08<br>E-06 | 0            | 0            | n/a            | n/a            | new TP-AeMBR  |
| 2992<br>7-08-0  | 2-Benzothiazolamine, 5,6-dimethyl-                | 0     | 0      | 0       | 4.34<br>E-06 | 6.07<br>E-06 | 5.16<br>E-06 | 0            | 0            | n/a            | n/a            | new TP-AeMBR  |
| 619-<br>62-5    | 4-Isopropyl-1-methylcyclohex-2-enol               | 0     | 0      | 0       | 2.95<br>E-05 | 3.66<br>E-05 | 6.69<br>E-05 | 0            | 0            | n/a            | n/a            | new TP-AeMBR  |
| 1361<br>8-88-7  | 5,6,7,8-Tetrahydroindolizine                      | 0     | 0      | 0       | 3.80<br>E-06 | 7.23<br>E-06 | 1.29<br>E-05 | 0            | 0            | n/a            | n/a            | new TP-AeMBR  |
| 1500<br>1-27-1  | 3,4-Dimethoxybenzylideneacetone                   | 0     | 0      | 0       | 5.76<br>E-06 | 9.81<br>E-06 | 1.28<br>E-05 | 0            | 0            | n/a            | n/a            | new TP-AeMBR  |
| 718-<br>25-2    | Benzene, 1-fluoro-4-(2-phenylethenyl)-, (E)-      | 0     | 0      | 0       | 0            | 3.40<br>E-06 | 7.58<br>E-06 | 0            | 0            | n/a            | n/a            | new TP-AeMBR  |
| 536-<br>78-7    | Pyridine, 3-ethyl-                                | 0     | 0      | 0       | 0            | 0            | 0            | 0.000<br>437 | 0.000<br>816 | n/a            | n/a            | new TP-AnMBR  |
| 0350<br>-03-08  | Ethanone, 1-(3-pyridinyl)-                        | 0     | 0      | 0       | 0            | 0            | 0            | 2.97<br>E-06 | 8.75<br>E-06 | n/a            | n/a            | new TP-AnMBR  |
| 1121<br>-25-1   | 3-Pyridinol, 2-methyl-                            | 0     | 0      | 0       | 0            | 0            | 0            | 4.35<br>E-05 | 3.36<br>E-05 | n/a            | n/a            | new TP-AnMBR  |
| 1362<br>3-12-6  | 2-tert-Butylthiazole                              | 0     | 0      | 0       | 0            | 0            | 0            | 4.91<br>E-06 | 1.84<br>E-05 | n/a            | n/a            | new TP-AnMBR  |
| 514-<br>95-4    | 1,5,5-Trimethyl-6-methylene-cyclohexene           | 0     | 0      | 0       | 0            | 0            | 0            | 0            | 0.000<br>499 | n/a            | n/a            | new TP-AnMBR  |
| 137-<br>00-8    | 5-Thiazoleethanol, 4-methyl-                      | 0     | 0      | 0       | 0            | 0            | 0            | 0.000<br>547 | 0.000<br>317 | n/a            | n/a            | new TP-AnMBR  |
| 1895<br>1-85-4  | (R)-(+)-Citronellic acid                          | 0     | 0      | 0       | 0            | 0            | 0            | 0.000<br>371 | 0.000<br>699 | n/a            | n/a            | new TP-AnMBR  |
| 1780<br>-19-4   | Quinoline, 1,2,3,4-tetrahydro-2-methyl-           | 0     | 0      | 0       | 0            | 0            | 0            | 4.16<br>E-05 | 1.18<br>E-04 | n/a            | n/a            | new TP-AnMBR  |
| 2878<br>5-06-0  | Benzaldehyde, 4-propyl-                           | 0     | 0      | 0       | 0            | 0            | 0            | 4.79<br>E-06 | 7.63<br>E-06 | n/a            | n/a            | new TP-AnMBR  |
| 2033<br>-30-9   | 5,6-Dimethyl-2-benzimidazolinone                  | 0     | 0      | 0       | 0            | 0            | 0            | 2.49<br>E-05 | 1.22<br>E-04 | n/a            | n/a            | new TP-AnMBR  |
| 2231<br>9-31-9  | 4-Hepten-3-one, 4-methyl-                         | 0     | 0      | 0       | 0            | 0            | 0            | 6.99<br>E-06 | 1.63<br>E-05 | n/a            | n/a            | new TP-AnMBR  |
| 0-00-<br>0      | Carbonic acid, monoamide, N-butyl-, allyl ester   | 0     | 0      | 0       | 0            | 0            | 0            | 1.99<br>E-05 | 5.38<br>E-05 | n/a            | n/a            | new TP-AnMBR  |
| 6205<br>6-54-6  | 2,2-Dimethyl-N-phenethylpropionamide              | 0     | 0      | 0       | 0            | 0            | 0            | 0.000<br>219 | 0.000<br>218 | n/a            | n/a            | new TP-AnMBR  |
| 0-00-<br>0      | 5-(Thiophen-2-yl)-1,2-oxazole-3-carboxylic acid   | 0     | 0      | 0       | 0            | 0            | 0            | 4.15<br>E-05 | 1.91<br>E-04 | n/a            | n/a            | new TP-AnMBR  |
| 2210<br>5-12-0  | 4H-1-Benzopyran-4-one, 6-hydroxy-2-methyl-        | 0     | 0      | 0       | 0            | 0            | 0            | 7.31<br>E-06 | 1.50<br>E-05 | n/a            | n/a            | new TP-AnMBR  |

| CAS No.   | Compound Name                         | Inf-I | Inf-II | Inf-III | AeM P-I   | AeM P-II  | AeM P-III | AnM P-II  | AnM P-III | AeM BR Avg. %C | AnM BR Avg. %C | R/P/TP/new TP |
|-----------|---------------------------------------|-------|--------|---------|-----------|-----------|-----------|-----------|-----------|----------------|----------------|---------------|
| 0-00-0    | 2-(2-Oxo-2H-pyridin-1-yl)benzoic acid | 0     | 0      | 0       | 0         | 0         | 0         | 3.30 E-06 | 1.57 E-05 | n/a            | n/a            | new TP-AnMBR  |
| 5191-80-0 | L-Cysteine, S-(diphenylmethyl)-       | 0     | 0      | 0       | 0         | 0         | 0         | 5.56 E-06 | 1.62 E-05 | n/a            | n/a            | new TP-AnMBR  |
| 0-00-0    | 4,8,12,16-tetraoxaeicosan-1-ol        | 0     | 0      | 0       | 0         | 0         | 0         | 8.77 E-05 | 1.66 E-04 | n/a            | n/a            | new TP-AnMBR  |
| 1002-84-2 | Pentadecanoic acid                    | 0     | 0      | 0       | 2.37 E-05 | 2.02 E-05 | 5.04 E-05 | 0         | 0.000 128 | n/a            | n/a            | new TP-both   |

**Note:** R = Removed; P = Persistent; TP = the peak area abundance increased >0% from influent to permeate; new TP = compounds that were not detected in the influent, that newly appeared in the permeate; Ae = AeMBR; An = AnMBR. The reported peak areas were normalized to the sample volume and the peak area of the internal standard, phenanthrene-d10.



**Table S12.** Description of the 15 selected compounds confirmed with their authentic standards.

| <b>CAS No.</b> | <b>Compound name</b>                       | <b>Vendor</b>                                    |
|----------------|--------------------------------------------|--------------------------------------------------|
| 59121-25-4     | Pentanenitrile, 5-(methylthio)-            | Enamine Building Blocks, Cincinnati, OH          |
| 54-11-5        | Nicotine                                   | Cambridge Isotope Laboratories,<br>Tewksbury, MA |
| 140-29-4       | Benzyl cyanide                             | Accustandard, New Haven, CT                      |
| 611-59-6       | 1,7-Dimethylxanthine                       | Cambridge Isotope Laboratories,<br>Tewksbury, MA |
| 2785-89-9      | Phenol, 4-ethyl-2-methoxy-                 | Enamine Building Blocks, Cincinnati, OH          |
| 7786-61-0      | 2-Methoxy-4-vinylphenol                    | AA Blocks, San Diego, CA                         |
| 122-48-5       | 2-Butanone, 4-(4-hydroxy-3-methoxyphenyl)- | Enamine Building Blocks, Cincinnati, OH          |
| 5651-47-8      | Benzoic acid, 3-(1-methylethyl)-           | Enamine Building Blocks, Cincinnati, OH          |
| 100-53-8       | Benzenemethanethiol                        | Enamine Building Blocks, Cincinnati, OH          |
| 138-87-4       | Terpineol                                  | Sigma Aldrich, Saint Louis, MO                   |
| 92-61-5        | Scopoletin                                 | TCI America, Portland, OR                        |
| 80-05-7        | Bisphenol A                                | Accustandard, New Haven, CT                      |
| 131-56-6       | Methanone, (2,4-dihydroxyphenyl)phenyl-    | Enamine Building Blocks, Cincinnati, OH          |
| 94-62-2        | Piperine                                   | Enamine Building Blocks, Cincinnati, OH          |
| 3380-34-5      | Triclosan                                  | Accustandard, New Haven, CT                      |

**Table S13.** Comparison of the number of compounds treated at various efficiencies by AeMBR vs AnMBR.

| <b>Percent Peak Area Change</b> | <b>AeMBR</b> | <b>AnMBR</b> |
|---------------------------------|--------------|--------------|
| -100%                           | 161          | 92           |
| < -95%                          | 165          | 108          |
| < -90%                          | 193          | 137          |
| < -85%                          | 204          | 163          |
| < -75%                          | 225          | 198          |
| < -50%                          | 255          | 270          |
| < -25%                          | 281          | 313          |
| < -10%                          | 296          | 337          |
| < 0%                            | 306          | 356          |
| > 0%                            | 220          | 193          |
| > 10%                           | 212          | 188          |
| > 25%                           | 200          | 182          |
| > 50%                           | 187          | 177          |
| > 75%                           | 180          | 177          |
| > 100%                          | 176          | 177          |
| > 200%                          | 170          | 172          |
| > 500%                          | 168          | 171          |
| > 1,000%                        | 167          | 171          |
| Newly formed                    | 165          | 171          |

**Note:** Compounds which were detected across all influent experimental replicates were isolated (N=493), then sorted into a percent peak area change category between “-100%” and “>1,000%”. Where a -100% change refer to the compounds that were detected in the influents, but not in the permeates. Newly formed compounds (the compounds that were not detected in the influents but were detected in the permeates) comprise their own category.

**Table S14.** The 34 tentatively identifiable compounds that were commonly removed by aerobic and anaerobic membrane bioreactor treatment.

| Peak                                                                   | CAS No.     | AeMBR  |        |        | AnMBR  |        |
|------------------------------------------------------------------------|-------------|--------|--------|--------|--------|--------|
|                                                                        |             | A (%C) | B (%C) | C (%C) | B (%C) | C (%C) |
| 1H-2-Benzopyran-1-one, 3,4-dihydro-8-hydroxy-6-methoxy-3-methyl-, (R)- | 13410-15-6  | -100   | -100   | -100   | -100   | -100   |
| 1H-Indole-3-propanoic acid                                             | 830-96-6    | -100   | -100   | -100   | -100   | -100   |
| 2,5-Piperazinedione, 3-(phenylmethyl)-                                 | 5037-75-2   | -100   | -100   | -100   | -100   | -100   |
| 2-Methoxyresorcinol                                                    | 29267-67-2  | -100   | -100   | -100   | -100   | -100   |
| 4-(2,6,6-Trimethylcyclohexa-1,3-dienyl)but-3-en-2-one                  | 1203-08-3   | -100   | -100   | -100   | -100   | -100   |
| 4-Methyl-1,2,3-trithiolane                                             | -           | -100   | -100   | -100   | -100   | -100   |
| 5-Ethoxy-2-methyl-pyridine                                             | 55270-48-9  | -100   | -100   | -100   | -100   | -100   |
| 5-Isopropenyl-2-methylcyclopent-1-enecarboxaldehyde                    | -           | -100   | -100   | -100   | -100   | -100   |
| Azulene, 1,4-dimethyl-7-(1-methylethyl)-                               | 489-84-9    | -100   | -100   | -100   | -100   | -100   |
| Benzene, 1-heptenyl-                                                   | 829-99-2    | -100   | -100   | -100   | -100   | -100   |
| Benzofuran, 4,7-dimethyl-                                              | 28715-26-6  | -100   | -100   | -100   | -100   | -100   |
| Benzothiazole, 6-methoxy-2-methyl-                                     | 2941-72-2   | -100   | -100   | -100   | -100   | -100   |
| Bicyclo[3.3.1]nonan-2-one, 1-methyl-9-(1-methylethylidene)-            | 56630-95-6  | -100   | -100   | -100   | -100   | -100   |
| Cyclic octaatomic sulfur                                               | 10544-50-0  | -100   | -100   | -100   | -100   | -100   |
| Indole-2,3-dione, 1-(hydroxymethyl)-                                   | 50899-59-7  | -100   | -100   | -100   | -100   | -100   |
| Indolizine                                                             | 274-40-8    | -100   | -100   | -100   | -100   | -100   |
| Isofraxidin                                                            | 486-21-5    | -100   | -100   | -100   | -100   | -100   |
| Lumichrome                                                             | 1086-80-2   | -100   | -100   | -100   | -100   | -100   |
| Resorcinol                                                             | 108-46-3    | -100   | -100   | -100   | -100   | -100   |
| Thiophene, 2-formyl-2,3-dihydro-                                       | 290354-70-0 | -100   | -100   | -100   | -100   | -100   |
| 1,7-Dimethylxanthine                                                   | 611-59-6    | -100   | -100   | -100   | -99    | -98    |
| Benzeneethanol, 4-hydroxy-                                             | 501-94-0    | -100   | -100   | -100   | -99    | -97    |
| 5-Methyl-1,2,3,4-tetrathiane                                           | 116664-30-3 | -100   | -100   | -100   | -93    | -93    |
| 3H-1,2-Benzodithiol-3-one                                              | 1677-27-6   | -100   | -100   | -100   | -91    | -95    |
| 2-Acetyl-5-methylthiophene                                             | 5756-24-1   | -100   | -100   | -100   | -98    | -95    |
| 2,4(1H,3H)-Pteridinedione, 1,3-dimethyl-                               | 13401-18-8  | -99    | -100   | -100   | -97    | -97    |
| 5H-1-Pyridine                                                          | 270-91-7    | -98    | -100   | -100   | -99    | -99    |
| 1H-Indole, 2-methyl-                                                   | 95-20-5     | -99    | -99    | -99    | -99    | -97    |
| Dimethyl trisulfide                                                    | 3658-80-8   | -98    | -99    | -98    | -98    | -98    |
| 3-Methoxyparacetamol                                                   | 3251-55-6   | -97    | -96    | -100   | -94    | -95    |
| Linalool                                                               | 78-70-6     | -92    | -100   | -100   | -97    | -94    |
| 2-Propenoic acid, 3-(4-methoxyphenyl)-, 2-ethylhexyl ester             | 5466-77-3   | -91    | -99    | -100   | -95    | -100   |
| Benzene, 1-isocyano-2-methyl-                                          | 10468-64-1  | -96    | -97    | -97    | -97    | -93    |
| 2-Propenoic acid, 3-(2-hydroxyphenyl)-, (E)-                           | 614-60-8    | -93    | -98    | -98    | -97    | -92    |

**Table S15.** The 21 tentatively identifiable compounds that were removed by AeMBR treatment and not AnMBR treatment.

| Compound Name                                                   | CAS No.    | AeMBR  |        |        |           | AnMBR  |        |           |
|-----------------------------------------------------------------|------------|--------|--------|--------|-----------|--------|--------|-----------|
|                                                                 |            | A (%C) | B (%C) | C (%C) | Avg. (%C) | B (%C) | C (%C) | Avg. (%C) |
| o-Hydroxybiphenyl                                               | 90-43-7    | -96    | -96    | -93    | -95       | -35    | 666    | 316       |
| 3,5-di-tert-Butyl-4-hydroxybenzyl alcohol                       | 88-26-6    | -100   | -100   | -100   | -100      | -45    | 371    | 163       |
| Phenol, 4-ethyl-2-methyl-                                       | 2219-73-0  | -100   | -100   | -100   | -100      | 3      | 196    | 100       |
| 1,4-Benzenediamine, N-(1-methylethyl)-N'-phenyl-                | 101-72-4   | -100   | -100   | -100   | -100      | 86     | 1      | 44        |
| Quinoline, 5-methyl-                                            | 7661-55-4  | -100   | -100   | -100   | -100      | -46    | 76     | 15        |
| Thiazolidine, 2-ethyl-                                          | 24050-09-7 | -100   | -100   | -100   | -100      | -64    | 92     | 14        |
| 4-Aminobenzoic acid                                             | 150-13-0   | -100   | -100   | -100   | -100      | -46    | 67     | 10        |
| p-Hydroxybiphenyl                                               | 92-69-3    | -100   | -100   | -100   | -100      | -20    | -24    | -22       |
| 1-(2-Thienyl)-1-propanone                                       | 13679-75-9 | -100   | -100   | -100   | -100      | -69    | 24     | -23       |
| Formamide, N-(2-acetylphenyl)-                                  | -          | -100   | -100   | -100   | -100      | -53    | -4     | -28       |
| Etiracetam                                                      | 33996-58-6 | -100   | -100   | -100   | -100      | -44    | -16    | -30       |
| Phenol, 3-chloro-                                               | 108-43-0   | -100   | -100   | -100   | -100      | -50    | -51    | -50       |
| 3-pyridinecarbonitrile, 2-amino-1,6-dihydro-1,4-dimethyl-6-oxo- | -          | -100   | -100   | -100   | -100      | -76    | -44    | -60       |
| Chloroxylenol                                                   | 88-04-0    | -94    | -98    | -96    | -96       | -77    | -48    | -62       |
| 2,4(1H,3H)-Quinazolinedione                                     | 86-96-4    | -100   | -100   | -100   | -100      | -62    | -76    | -69       |
| Eucalyptol                                                      | 470-82-6   | -98    | -100   | -99    | -99       | -72    | -80    | -76       |
| 2-(2-Hydroxyethoxy)phenol                                       | 4792-78-3  | -100   | -100   | -100   | -100      | -78    | -75    | -76       |
| S-(+)-5-(1-Hydroxy-1-methylethyl)-2-methyl-2-cyclohexen-1-one   | -          | -93    | -97    | -97    | -96       | -88    | -74    | -81       |
| Furan, 2-pentyl-                                                | 3777-69-3  | -91    | -97    | -98    | -95       | -82    | -88    | -85       |
| Butanenitrile, 4-(methylthio)-                                  | 59121-24-3 | -100   | -100   | -100   | -100      | -89    | -81    | -85       |
| 2(5H)-Thiophenone, 5-methyl-                                    | 7210-64-2  | -100   | -100   | -100   | -100      | -87    | -86    | -87       |

**Note:** "Avg." = Average

**Table S16.** The 113 tentatively identified persistent compounds and potential transformation products. Persistent compounds were defined as compounds that had less than 90% percent peak area decrease from influent to membrane permeate.

| Compound Name                                                            | CAS No.    | AcMBR  |        |        |           | AnMBR  |        |           |
|--------------------------------------------------------------------------|------------|--------|--------|--------|-----------|--------|--------|-----------|
|                                                                          |            | A (%C) | B (%C) | C (%C) | Avg. (%C) | B (%C) | C (%C) | Avg. (%C) |
| 1H-Benzotriazole                                                         | 95-14-7    | 1342   | 2147   | 2949   | 2146      | 143    | 154    | 148       |
| Benzoic acid, 3,5-bis(1,1-dimethylethyl)-2-hydroxy-                      | 19715-19-6 | 1474   | 1150   | 831    | 1152      | -30    | -40    | -35       |
| 3,5-di-tert-Butyl-4-hydroxyphenylpropionic acid                          | 20170-32-5 | 2349   | 325    | 567    | 1080      | -2     | 355    | 176       |
| 2-Pentanamine, N-ethyl-4-methyl-                                         | -          | 2650   | -21    | 10     | 880       | -50    | 194    | 72        |
| Gabapentin                                                               | 60142-96-3 | 1871   | 209    | 489    | 857       | -48    | 260    | 106       |
| 2,5-Furandione, 3,4-dimethyl-                                            | 766-39-2   | 1833   | 564    | 151    | 849       | -32    | 16     | -8        |
| Tri(2-chloroethyl) phosphate                                             | 115-96-8   | 1296   | -3     | 344    | 546       | -38    | 233    | 97        |
| Benzenesulfonamide, 4-methyl-                                            | 70-55-3    | 1208   | 72     | 127    | 469       | -45    | 50     | 2         |
| Triacetin                                                                | 102-76-1   | 44     | 1140   | 171    | 452       | 435    | 40     | 238       |
| 4H-Pyran-4-one, 2,3-dihydro-3,5-dihydroxy-6-methyl-                      | 28564-83-2 | 455    | 41     | 829    | 442       | -50    | 595    | 272       |
| Benzoic acid, 4-ethoxy-, ethyl ester                                     | 23676-09-7 | 1195   | 41     | 52     | 429       | 93     | -35    | 29        |
| Benzenesulfonamide, 2-methyl-                                            | 88-19-7    | 1082   | 49     | 120    | 417       | -45    | 73     | 14        |
| Succinimide                                                              | 123-56-8   | 1111   | -9     | 57     | 386       | -81    | -86    | -84       |
| Carbamazepine                                                            | 298-46-4   | 721    | 29     | 373    | 374       | -78    | 219    | 71        |
| 1H-Indene-4-acetic acid, 6-(1,1-dimethylethyl)-2,3-dihydro-1,1-dimethyl- | -          | 498    | 28     | 523    | 350       | -19    | 180    | 81        |
| 2,6-Diphenyl-4-methyl-1,4-dihydropyridine-3,5-dicarbonitrile             | -          | 691    | 179    | 82     | 318       | -78    | -68    | -73       |
| Acridine                                                                 | 260-94-6   | 576    | 362    | 11     | 316       | -52    | 4      | -24       |
| Fluconazole                                                              | 86386-73-4 | 562    | 96     | 153    | 270       | -52    | 136    | 42        |
| 2,3-Dichlorobenzonitrile                                                 | 61593-48-4 | 619    | 119    | 71     | 270       | -41    | 40     | 0         |
| 2-Propenenitrile, 3,3-diphenyl-                                          | 3531-24-6  | 119    | 4      | 663    | 262       | -51    | 77     | 13        |
| 6-Ethoxy-1,2,3,4-tetrahydro-2,2,4-trimethylquinoline                     | 16489-90-0 | 700    | -5     | 65     | 253       | -56    | 348    | 146       |
| Propanediamide, 2-ethyl-2-phenyl-                                        | 7206-76-0  | 386    | 167    | 195    | 249       | -54    | 17     | -19       |
| Phenytoin                                                                | 57-41-0    | 609    | 53     | 76     | 246       | -66    | 54     | -6        |
| 3-Hexene-2,5-dione                                                       | 4436-75-3  | 368    | 202    | 162    | 244       | 69     | 21     | 45        |
| 2,7(1H,3H)-Naphthalenedione, hexahydro-                                  | -          | 179    | -25    | 448    | 201       | -71    | 573    | 251       |
| Cyclohexanecarboxamide, N-ethyl-5-methyl-2-(1-methylethyl)-              | 39711-79-0 | 464    | 24     | 98     | 195       | -53    | 77     | 12        |
| Adipic acid, 2-decyl isobutyl ester                                      | -          | 258    | 259    | 60     | 192       | -21    | -61    | -41       |
| 2(5H)-Furanone, 4-methyl-3,5,5-tris(2-methyl-2-propenyl)-                | -          | 416    | 27     | 98     | 180       | -54    | 67     | 6         |
| Pyridine, 2,3,5-trimethyl-                                               | 695-98-7   | 525    | -5     | 21     | 180       | 25     | 255    | 140       |
| Benzenamine, 3-chloro-N-methyl-                                          | 7006-52-2  | 231    | -30    | 324    | 175       | 39     | 245    | 142       |
| (1S,4S,9aS)-4-Allyl-1-ethyl-1,2,3,4,8,9a-hexahydroquinolizine            | -          | 377    | 40     | 99     | 172       | 147    | 1130   | 639       |
| Benzhydryl isothiocyanate                                                | 3550-21-8  | 203    | 24     | 282    | 170       | -13    | 375    | 181       |
| D-Glucitol, 1,4:3,6-dianhydro-2,5-di-O-methyl-                           | 5306-85-4  | -58    | 30     | 505    | 159       | 43     | 363    | 203       |
| 3-Phenylpyrazin-2-ol                                                     | -          | 381    | 10     | 16     | 136       | -25    | 313    | 144       |
| Benzene, 1,2,3-trimethyl-                                                | 526-73-8   | 420    | -50    | 26     | 132       | -12    | -46    | -29       |
| Benzenesulfonamide, N-ethyl-2-methyl-                                    | 1077-56-1  | 336    | -32    | 82     | 129       | -53    | 109    | 28        |
| Primidone                                                                | 125-33-7   | 220    | 121    | 43     | 128       | -62    | -2     | -32       |
| 2-(Methylmercapto)benzothiazole                                          | 615-22-5   | 374    | 17     | -17    | 125       | -72    | 140    | 34        |
| 4-(2-(4-Formylphenyl)ethenyl)pyridine                                    | -          | 318    | 24     | 19     | 120       | -83    | -75    | -79       |
| 2-Propanol, 1-chloro-, phosphate (3:1)                                   | 13674-84-5 | 226    | 22     | 105    | 118       | -30    | 111    | 40        |
| 1,2-Benzenediacetonitrile                                                | 613-73-0   | 235    | 40     | 74     | 116       | -43    | 110    | 33        |

| Compound Name                                                | CAS No.     | AcMBR  |        |        |           | AnMBR  |        |           |  |
|--------------------------------------------------------------|-------------|--------|--------|--------|-----------|--------|--------|-----------|--|
|                                                              |             | A (%C) | B (%C) | C (%C) | Avg. (%C) | B (%C) | C (%C) | Avg. (%C) |  |
| Benzene, 1-ethyl-4-methyl-                                   | 622-96-8    | 410    | -46    | -23    | 114       | -3     | -67    | -35       |  |
| Benzenemethanol, à,à-dimethyl-                               | 617-94-7    | 360    | -14    | -43    | 101       | -4     | 107    | 51        |  |
| 3-Penten-1-ol, 2,2,4-trimethyl-                              | 5842-53-5   | 142    | 24     | 136    | 101       | 15     | 45     | 30        |  |
| Ethanone, 1-(3,4-dimethylphenyl)-                            | 3637-01-2   | 203    | -7     | 103    | 100       | -67    | -62    | -64       |  |
| Benzene, (trimethoxymethyl)-                                 | 707-07-3    | 165    | 32     | 97     | 98        | -34    | 36     | 1         |  |
| 2,6,6-Trimethyl-2-cyclohexene-1,4-dione                      | 1125-21-9   | 235    | 13     | 46     | 98        | -73    | -22    | -47       |  |
| 3-Ethylcyclopentanone                                        | 10264-55-8  | 151    | -79    | 215    | 96        | -75    | 300    | 113       |  |
| Bis(3-chloro-1-propyl)(1-chloro-2-propyl)phosphate           | 137888-35-8 | 230    | 20     | 25     | 92        | -38    | 32     | -3        |  |
| Benzene, 4-chloro-1-(2,4-dichlorophenoxy)-2-methoxy-         | 4640-01-1   | 220    | -15    | 64     | 90        | -5     | -30    | -18       |  |
| Diphenyl sulfone                                             | 127-63-9    | 206    | 3      | 32     | 80        | -51    | 24     | -13       |  |
| 4-Amino-6-hydroxypyrimidine                                  | 1193-22-2   | 161    | 9      | 33     | 68        | -34    | -32    | -33       |  |
| Benzaldehyde, 4-chloro-                                      | 104-88-1    | 211    | 15     | -34    | 64        | -41    | -51    | -46       |  |
| Benzamide, N,N-dimethyl-                                     | 611-74-5    | -9     | -54    | 241    | 59        | -80    | -89    | -85       |  |
| 2,6-Xylidine                                                 | 87-62-7     | 291    | -59    | -62    | 57        | -74    | -57    | -66       |  |
| Benzene, 1,3-dichloro-                                       | 541-73-1    | 122    | 47     | -33    | 45        | 26     | -70    | -22       |  |
| Benzophenone                                                 | 119-61-9    | 159    | -33    | 4      | 43        | -38    | 88     | 25        |  |
| 2-Pyrrolidinone                                              | 616-45-5    | 187    | -46    | -13    | 42        | -77    | -85    | -81       |  |
| 2-Acetyl-5-methylfuran                                       | 1193-79-9   | 90     | 101    | -70    | 40        | 16     | -54    | -19       |  |
| Benzothiazole                                                | 95-16-9     | 131    | -15    | -11    | 35        | -60    | -55    | -58       |  |
| Benzoic acid, 2-benzoyl-, methyl ester                       | 606-28-0    | 105    | 17     | -24    | 32        | -28    | -47    | -37       |  |
| 1H-Indene, 2,3-dihydro-4-methyl-                             | 824-22-6    | 18     | 66     | 1      | 28        | 139    | -63    | 38        |  |
| Benzene, 1-chloro-3-phenoxy-                                 | 6452-49-9   | 161    | -37    | -40    | 28        | 39     | -72    | -17       |  |
| Adipic acid, 3-heptyl isobutyl ester                         | -           | 84     | -27    | 25     | 27        | -85    | -67    | -76       |  |
| 2(3H)-Furanone, 5-acetyldihydro-                             | 29393-32-6  | 116    | -19    | -22    | 25        | -86    | -88    | -87       |  |
| Benzocycloheptatriene                                        | -           | 156    | -33    | -51    | 24        | -35    | -52    | -43       |  |
| 1-Propanol, 2,3-dichloro-, phosphate (3:1)                   | 78-43-3     | 119    | -33    | -16    | 23        | -58    | -29    | -43       |  |
| Cycloprop[a]indene, 1,1a,6,6a-tetrahydro-                    | 15677-15-3  | 11     | 15     | 43     | 23        | 160    | -48    | 56        |  |
| Ethosuximide                                                 | 77-67-8     | -69    | 153    | -32    | 18        | 202    | 650    | 426       |  |
| 4-Phenylbut-3-ene-1-yne                                      | -           | 82     | -12    | -24    | 16        | -6     | -31    | -19       |  |
| Benzonitrile                                                 | 100-47-0    | 162    | -50    | -66    | 15        | -69    | -30    | -50       |  |
| Phenanthrene                                                 | 85-01-8     | 111    | -23    | -44    | 15        | -25    | -49    | -37       |  |
| 6-Methylenebicyclo[3.2.0]hept-3-en-2-one                     | -           | 87     | -34    | -17    | 12        | -49    | -13    | -31       |  |
| 3,5-di-tert-Butyl-4-hydroxybenzaldehyde                      | 1620-98-0   | 82     | -28    | -27    | 9         | -46    | -48    | -47       |  |
| Triclosan                                                    | 3380-34-5   | 122    | -51    | -50    | 7         | -47    | -39    | -43       |  |
| 1H-Pyrrole-2,5-dione, 3-ethenyl-4-methyl-                    | 21494-57-5  | 76     | -35    | -41    | 0         | -71    | -34    | -52       |  |
| Isoquinoline                                                 | 119-65-3    | 82     | -60    | -27    | -1        | -52    | -8     | -30       |  |
| Acetophenone                                                 | 98-86-2     | 51     | -27    | -36    | -4        | -21    | 24     | 1         |  |
| Pyridine, 4-(diphenylmethyl)-                                | 3678-72-6   | 116    | -76    | -74    | -12       | -48    | -83    | -65       |  |
| (S,E)-2,5-Dimethyl-4-vinylhexa-2,5-dien-1-yl acetate         | -           | 52     | -38    | -51    | -12       | -1     | -50    | -26       |  |
| Undecane, 5,7-dimethyl-                                      | 17312-83-3  | 27     | -21    | -54    | -16       | -64    | -73    | -69       |  |
| 1H-Pyrazole, 4,5-dihydro-5,5-dimethyl-4-isopropylidene-      | 106251-09-6 | 45     | -45    | -53    | -17       | -46    | 4      | -21       |  |
| 2,6-Di-tert-butyl-4-hydroxy-4-methylcyclohexa-2,5-dien-1-one | 10396-80-2  | 3      | -69    | 9      | -19       | -54    | 87     | 17        |  |
| Thymoquinone                                                 | 490-91-5    | 55     | -72    | -42    | -20       | -83    | 15     | -34       |  |
| 2,4-Di-tert-butylphenol                                      | 96-76-4     | -13    | -38    | -11    | -21       | -19    | 105    | 43        |  |
| Benzaldehyde                                                 | 100-52-7    | 36     | -34    | -65    | -21       | -69    | -70    | -69       |  |
| 1,4-Cyclohexanedione, 2,2,6-trimethyl-                       | 20547-99-3  | 25     | -57    | -35    | -22       | -56    | 22     | -17       |  |
| Cyclohexanone, 3,3,5-trimethyl-                              | 873-94-9    | 6      | -62    | -17    | -24       | -26    | 102    | 38        |  |
| 1-Penten-3-one, 1-(2,6,6-trimethyl-2-cyclohexen-1-yl)-       | 7779-30-8   | 12     | -50    | -46    | -28       | -85    | -51    | -68       |  |
| 1,3,7,9-Tetramethyluric acid                                 | 2309-49-1   | 77     | -82    | -85    | -30       | -47    | 7      | -20       |  |
| Naphthalene, 1,2,3,4-tetrahydro-5-methyl-                    | 2809-64-5   | -44    | -34    | -20    | -32       | -38    | 18     | -10       |  |
| 3-tert-Butyl-4-hydroxyanisole                                | 121-00-6    | 28     | -61    | -70    | -34       | -85    | -60    | -72       |  |
| 2-Methoxy-6-methylaniline                                    | 50868-73-0  | -4     | -50    | -56    | -37       | -58    | -15    | -37       |  |
| 2-Octyl benzoate                                             | 6938-51-8   | 42     | -71    | -87    | -39       | -63    | -86    | -74       |  |

| Compound Name                                                   | CAS No.    | AcMBR  |        |        |           | AnMBR  |        |           |  |
|-----------------------------------------------------------------|------------|--------|--------|--------|-----------|--------|--------|-----------|--|
|                                                                 |            | A (%C) | B (%C) | C (%C) | Avg. (%C) | B (%C) | C (%C) | Avg. (%C) |  |
| Propofol                                                        | 2078-54-8  | 27     | -70    | -83    | -42       | -28    | 216    | 94        |  |
| 1(3H)-Isobenzofuranone                                          | 87-41-2    | 28     | -77    | -77    | -42       | -64    | -41    | -52       |  |
| 1H-Pyrrole-2,5-dione, 3-ethyl-4-methyl-                         | 20189-42-8 | -8     | -73    | -48    | -43       | -76    | -2     | -39       |  |
| Oxepine, 2,7-dimethyl-                                          | 1487-99-6  | -12    | -51    | -70    | -44       | -83    | -84    | -84       |  |
| Benzenepropanenitrile, 4-hydroxy-                               | 17190-29-3 | -24    | -70    | -47    | -47       | -76    | -22    | -49       |  |
| Bayer 28,589                                                    | 728-40-5   | -35    | -61    | -46    | -47       | -55    | -28    | -42       |  |
| Benzene, 1,1'-[1,2-ethanediylbis(oxy)]bis-                      | 104-66-5   | 8      | -85    | -83    | -53       | -76    | -40    | -58       |  |
| Methyl dehydroabietate                                          | 1235-74-1  | -10    | -69    | -84    | -54       | -66    | -77    | -72       |  |
| Benzene, (2,2-dimethoxyethyl)-                                  | 101-48-4   | -15    | -78    | -75    | -56       | -43    | 89     | 23        |  |
| Triphenyl phosphate                                             | 115-86-6   | 1      | -84    | -85    | -56       | -83    | -48    | -66       |  |
| 3-Butylisobenzofuran-1(3H)-one                                  | 6066-49-5  | -14    | -78    | -82    | -58       | -73    | -50    | -61       |  |
| Butylated Hydroxytoluene                                        | 128-37-0   | -29    | -78    | -81    | -63       | -61    | -89    | -75       |  |
| Carbamic acid, (3-chloro-4-hydroxyphenyl)-, 1-methylethyl ester | 28705-96-6 | -31    | -83    | -80    | -65       | -64    | 81     | 9         |  |
| Tricyclo[5.2.1.0(2,6)]dec-3-en-10-one                           | -          | -60    | -83    | -62    | -68       | -5     | 331    | 163       |  |
| 2-Cyclohexen-1-one, 3-methyl-                                   | 1193-18-6  | -55    | -81    | -70    | -69       | -43    | 91     | 24        |  |
| Norharmane, N-acetyl-                                           | -          | -45    | -87    | -88    | -73       | -82    | -12    | -47       |  |
| 1,2-Benzenedicarboxaldehyde                                     | 643-79-8   | -61    | -89    | -84    | -78       | -74    | 90     | 8         |  |
| Amyl cyclopentenone                                             | 4819-67-4  | -66    | -87    | -85    | -79       | -83    | -72    | -78       |  |
| Aniline                                                         | 62-53-3    | -84    | -90    | -70    | -81       | -9     | 0      | -5        |  |

Note: "Avg." = Average

**Table S17.** The 30 tentatively identified compounds unique to the aerobic membrane permeate samples.

| <b>Compound Name</b>                                                        | <b>CAS No.</b> |
|-----------------------------------------------------------------------------|----------------|
| (4aR,7S,7aS)-4,7-Dimethyl-5,6,7,7a-tetrahydrocyclopenta[c] pyran-1(4aH)-one | 21651-53-6     |
| 1,2,3,4-Tetramethoxybenzene                                                 | 21450-56-6     |
| 1,3-Cyclohexanedione, 2,5,5-trimethyl-                                      | 1125-11-7      |
| 1,4-Cyclohexanedione*                                                       | 637-88-7       |
| 2,1-Benzisoxazole, 7-ethyl-3-methyl-                                        | 108562-69-2    |
| 2,6-Bis(1,1-dimethylethyl)-4-(1-oxopropyl)phenol                            | 14035-34-8     |
| 2,7:3,6-Dimethano-2H-1-benzopyran, octahydro-                               | -              |
| 2-Benzothiazolamine, 5,6-dimethyl-**                                        | 29927-08-0     |
| 2-Cyclopenten-1-one, 4-hydroxy-2-methyl-3-phenyl-                           | -              |
| 2H-Benzocyclohepten-2-one, decahydro-4a-methyl-, trans-                     | -              |
| 3,4-Dimethoxybenzylideneacetone                                             | -              |
| 3,5-Octadiene, 4,5-diethyl-                                                 | -              |
| 3-Hexen-2-one, 3,4-dimethyl-                                                | -              |
| 4-(4-Chlorophenyl)-2-pyrrolidinone                                          | 22518-27-0     |
| 4H-1,2,4-Triazol-3-amine, 4-ethyl-                                          | 42786-06-1     |
| 4-Isopropyl-1-methylcyclohex-2-enol                                         | 619-62-5       |
| 5,6,7,8-Tetrahydroindolizine                                                | -              |
| 5-Acetyl-4-methylthiazole                                                   | 38205-55-9     |
| 5-Isopropyl-3,8-dimethylazulene-1-carbonitrile                              | 93007-54-6     |
| Benzene, 1-azido-3-methoxy-                                                 | 3866-16-8      |
| cis-1-(4-Isopropylphenyl)-3-(2-furyl)cyclopropane                           | 84922-05-4     |
| Danthron**                                                                  | 117-10-2       |
| Ethanone, 1-(7-hydroxy-5-methoxy-2,2-dimethyl-2H-1-benzopyran-8-yl)-        | 484-18-4       |
| Naphthalene, 2,3-dimethoxy-                                                 | 10103-06-7     |
| N-Methylmaleimide*                                                          | 930-88-1       |
| Oxcarbapazine**                                                             | 28721-07-5     |
| Pyridine, 2-phenyl-*                                                        | 1008-89-5      |
| S-Methyl methanethiosulphonate*                                             | 2949-92-0      |
| Sydnone, 3-(2-methylphenyl)-                                                | 3483-18-9      |
| Trioxsalen**                                                                | 3902-71-4      |



**Table S18.** The 18 tentatively identifiable compounds unique to the anaerobic membrane permeate samples.

| <b>Compound Name</b>                            | <b>CAS ID</b> |
|-------------------------------------------------|---------------|
| (R)-(+)-Citronellic acid                        | 18951-85-4    |
| 2-(2-Oxo-2H-pyridin-1-yl)benzoic acid           | -             |
| 2,2-Dimethyl-N-phenethylpropionamide            | 62056-54-6    |
| 2-tert-Butylthiazole                            | 13623-12-6    |
| 3-Pyridinol, 2-methyl-                          | 1121-25-1     |
| 4,8,12,16-tetraoxaeicosan-1-ol                  | -             |
| 4H-1-Benzopyran-4-one, 6-hydroxy-2-methyl-      | -             |
| 4-Hepten-3-one, 4-methyl-                       | 22319-31-9    |
| 5-(Thiophen-2-yl)-1,2-oxazole-3-carboxylic acid | 763109-71-3   |
| 5,6-Dimethyl-2-benzimidazolinone                | 2033-30-9     |
| 5-Thiazoleethanol, 4-methyl-**                  | 137-00-8      |
| Benzaldehyde, 4-propyl-*                        | 28785-06-0    |
| Carbonic acid, monoamide, N-butyl-, allyl ester | -             |
| Ethanone, 1-(3-pyridinyl)-                      | -             |
| L-Cysteine, S-(diphenylmethyl)-                 | 5191-80-0     |
| Pyridine, 3-ethyl-*                             | 536-78-7      |
| Quinoline, 1,2,3,4-tetrahydro-2-methyl-         | -             |

**Table S19.** Compounds confirmed with analytical standards and a comparison of their treatment efficiencies in Mladenov et al. (2021)<sup>3</sup> to the AeMBR and AnMBR.

| Alternate name                           | CAS No.    | % Change US-C | % Change SA-D | % Change SA-C | Avg. % Change AeMBR | Avg. % Change AnMBR |
|------------------------------------------|------------|---------------|---------------|---------------|---------------------|---------------------|
| 4-(4-Hydroxy-3-methoxyphenyl)-2-butanone | 122-48-5   | -100 %        | -100 %        | -100 %        | -100 ± 0 %          | -100 ± 0 %          |
| 4-Ethyl-2-methoxyphenol                  | 2785-89-9  | -100 %        | -100 %        | -100 %        | -100 ± 0 %          | -100 ± 0 %          |
| Piperine                                 | 94-62-2    | -100 %        | -100 %        | -100 %        | -100 ± 0 %          | -100 ± 0 %          |
| Scopoletin                               | 92-61-5    | -100 %        | -100 %        | -100 %        | -100 ± 0 %          | -100 ± 0 %          |
| Benzyl cyanide                           | 140-29-4   | -94 %         | -98 %         | -96 %         | -97 ± 0 %           | -95 ± 2 %           |
| 2,4-Dihydroxy benzophenone               | 131-56-6   | -100 %        | -100 %        | -100 %        | -100 ± 0 %          | -89 ± 7 %           |
| 5-(Methylsulfanyl) pentanenitrile        | 59121-25-4 | -100 %        | -100 %        | -100 %        | -100 ± 0 %          | -87 ± 3 %           |
| 1,7-Dimethylxanthine                     | 611-59-6   | -100 %        | -100 %        | -100 %        | -100 ± 0 %          | -77 ± 19 %          |
| Benzoic acid, 3-(1-methylethyl)-         | 5651-47-8  | -100 %        | -100 %        | -100 %        | -100 ± 0 %          | -67 ± 1 %           |
| Nicotine                                 | 23950-04-1 | -100 %        | -100 %        | -100 %        | -99 ± 1 %           | -68 ± 20 %          |
| Benzenemethanethiol                      | 100-53-8   | -100 %        | -100 %        | -100 %        | -93 ± 7 %           | -83 ± 6 %           |
| beta-Terpineol                           | 138-87-4   | -99 %         | -100 %        | 29 %          | -99 ± 0 %           | -94 ± 2 %           |
| Bisphenol A                              | 80-05-7    | -57 %         | -87 %         | -100 %        | -91 ± 8 %           | -13 ± 41 %          |
| 2-Methoxy-4-vinylphenol                  | 7786-61-0  | -66 %         | -98 %         | -81 %         | -60 ± 22 %          | -95 ± 2 %           |
| Triclosan                                | 3380-34-5  | -89 %         | -89 %         | -93 %         | 7 ± 81 %            | -43 ± 4 %           |

**Note:** “SA-C” = South Africa – Centralized Wastewater Treatment Plant; “SA-D” = South Africa – Decentralized Wastewater Treatment Plant; “US-C” = United States Centralized Wastewater Treatment Plant

**Table S20.** The 15 physicochemical properties assessed by principal component analysis.

|                                                                              |
|------------------------------------------------------------------------------|
| Molecular Weight                                                             |
| Density <sup>a</sup> (g/cm <sup>3</sup> )                                    |
| Surface Tension <sup>a</sup> (dyn/cm)                                        |
| Viscosity <sup>a</sup> (cP)                                                  |
| Atmospheric Hydroxylation Rate <sup>b</sup> (cm <sup>3</sup> / molecule*sec) |
| Bioconcentration Factor <sup>b</sup>                                         |
| Biodegradation Half-Life (day) <sup>b</sup>                                  |
| Boiling Point <sup>b</sup> (°C)                                              |
| Henry's Law Constant <sup>b</sup> (atm-m <sup>3</sup> /mol)                  |
| Fish Biotransformation Half-Life <sup>b</sup> (K <sub>M</sub> /day)          |
| Octanol Air Partition Coefficient <sup>b</sup> (Log K <sub>OA</sub> )        |
| Soil Adsorption Coefficient <sup>b</sup> , K <sub>OC</sub> (L/kg)            |
| Octanol Water Partition Coefficient <sup>b</sup> (Log P)                     |
| Melting Point <sup>b</sup> (°C)                                              |
| Vapor Pressure <sup>b</sup> (mmHg)                                           |
| Water Solubility <sup>b</sup> (mol/L)                                        |

**Note:** a. TEST prediction; TEST = Toxicity Estimation Software Tool; b. OPERA prediction; OPERA = Open Structure-activity/property Relationship App

**Table S21.** Twelve molecular descriptors assessed by principal component analysis.

|                               |
|-------------------------------|
| Fraction of Rotatable Bonds   |
| Number of Atoms               |
| Number of Bonds               |
| Molar Refractivity            |
| Polar Surface Area            |
| Geometrical Diameter          |
| Geometrical Radius            |
| Geometrical Shape Coefficient |
| Kier Shape 1                  |
| Kier Shape 2                  |
| Zagreb Group Index 1          |
| Zagreb Group Index 2          |

**Note:** Retrieved from JoeLib, ChemMine Tools

**Table S22.** Database of all 102 tentatively identified compounds containing at least one nitrogen atom which were common among all the influents (from treatment cycle I, II, and III).

| Compound Name                                                    | Log(P) | No. of N Atoms | AcMBR  |         |          | AnMBR   |          |
|------------------------------------------------------------------|--------|----------------|--------|---------|----------|---------|----------|
|                                                                  |        |                | I (%C) | II (%C) | III (%C) | II (%C) | III (%C) |
| *Indolizine                                                      | 2.49   | 1              | -100   | -100    | -100     | -100    | -100     |
| *Benzothiazole, 6-methoxy-2-methyl-                              | 2.25   | 1              | -100   | -100    | -100     | -100    | -100     |
| *Indole-2,3-dione, 1-(hydroxymethyl)-                            | 0.87   | 1              | -100   | -100    | -100     | -100    | -100     |
| *1H-Indole-3-propanoic acid                                      | 1.75   | 1              | -100   | -100    | -100     | -100    | -100     |
| *2,5-Piperazinedione, 3-(phenylmethyl)-                          | 1.61   | 2              | -100   | -100    | -100     | -100    | -100     |
| *Lumichrome                                                      | 1.93   | 4              | -100   | -100    | -100     | -100    | -100     |
| *5-Ethoxy-2-methyl-pyridine                                      | 1.64   | 1              | -100   | -100    | -100     | -100    | -100     |
| *1,7-Dimethylxanthine                                            | -0.22  | 4              | -100   | -100    | -100     | -99     | -98      |
| *2,5-Piperazinedione, 3-bis(2-methylpropyl)-                     | 0.87   | 2              | -100   | -100    | -100     | -92     | -78      |
| *Butanenitrile, 4-(methylthio)-                                  | 0.32   | 1              | -100   | -100    | -100     | -89     | -81      |
| *6-Methyl-2-pyridinecarbaldehyde                                 | 0.61   | 1              | -100   | -100    | -100     | -77     | -94      |
| *3-pyridinecarbonitrile, 2-amino-1,6-dihydro-1,4-dimethyl-6-oxo- | -      | 3              | -100   | -100    | -100     | -76     | -44      |
| Thiazolidine, 2-ethyl-                                           | 1.43   | 1              | -100   | -100    | -100     | -64     | 91       |
| *2,4(1H,3H)-Quinazolinone                                        | 0.77   | 2              | -100   | -100    | -100     | -62     | -76      |
| Formamide, N-(2-acetylphenyl)-                                   | -      | 1              | -100   | -100    | -100     | -53     | -4       |
| 4-Aminobenzoic acid                                              | 0.82   | 1              | -100   | -100    | -100     | -47     | 68       |
| Quinoline, 5-methyl-                                             | 2.38   | 1              | -100   | -100    | -100     | -46     | 76       |
| Etiracetam                                                       | -0.82  | 2              | -100   | -100    | -100     | -44     | -16      |
| 1,4-Benzenediamine, N-(1-methylethyl)-N'-phenyl-                 | 3.23   | 2              | -100   | -100    | -100     | 86      | 1        |
| *Theobromine                                                     | -0.77  | 4              | -100   | -99     | -99      | -88     | -96      |
| *2H-Indol-2-one, 1,3-dihydro-                                    | 1.16   | 1              | -100   | -97     | -98      | -61     | -94      |
| *Caffeine                                                        | -0.07  | 4              | -100   | -100    | -100     | -98     | -89      |
| *2,4(1H,3H)-Pteridinedione, 1,3-dimethyl-                        | 0.05   | 4              | -99    | -100    | -100     | -97     | -97      |
| *1H-Indole, 2-methyl-                                            | 2.53   | 1              | -99    | -99     | -99      | -99     | -97      |
| *5H-1-Pyridine                                                   | 1.65   | 1              | -98    | -100    | -100     | -99     | -99      |
| *3-Methoxyparacetamol                                            | 0.97   | 1              | -97    | -96     | -100     | -94     | -95      |
| *Benzene, 1-isocyano-2-methyl-                                   | 1.95   | 1              | -96    | -97     | -97      | -97     | -93      |
| 1H-Indole-2,3-dione                                              | 0.83   | 1              | -91    | -43     | -97      | -29     | -95      |
| *Theophylline                                                    | -0.02  | 4              | -87    | -93     | -90      | -92     | -76      |
| *Acetamide, N-[4-hydroxy-3-(methylthio)phenyl]-                  | 1.62   | 1              | -84    | -97     | -97      | -97     | -88      |
| Aniline                                                          | 0.90   | 1              | -84    | -90     | -70      | -9      | 0        |
| *Indole-5-aldehyde                                               | 1.82   | 1              | -83    | -83     | -97      | -96     | -92      |
| *Acetophenone, 4'-amino-                                         | 0.83   | 1              | -75    | -90     | -88      | -88     | -82      |
| Ethosuximide                                                     | 0.38   | 1              | -69    | 153     | -32      | 203     | 650      |
| Norharmaline, N-acetyl-                                          | -      | 2              | -45    | -87     | -88      | -82     | -12      |
| Bayer 28,589                                                     | 4.20   | 1              | -35    | -61     | -46      | -55     | -28      |
| Carbamic acid, (3-chloro-4-hydroxyphenyl)-, 1-methylethyl ester  | 1.98   | 1              | -31    | -83     | -80      | -64     | 81       |
| Benzenepropanenitrile, ̂-hydroxy-                                | 1.43   | 1              | -24    | -70     | -47      | -76     | -22      |
| Pyrazine, trimethyl-                                             | 0.95   | 2              | -10    | -88     | -100     | -22     | 166      |
| Benzamide, N,N-dimethyl-                                         | 0.62   | 1              | -9     | -54     | 241      | -80     | -89      |
| 1H-Pyrrole-2,5-dione, 3-ethyl-4-methyl-                          | 0.23   | 1              | -8     | -73     | -48      | -76     | -2       |
| 2-Methoxy-6-methylaniline                                        | 1.40   | 1              | -4     | -50     | -56      | -58     | -15      |
| 1H-Pyrazole, 4,5-dihydro-5,5-dimethyl-4-isopropylidene-          | 2.01   | 2              | 46     | -45     | -53      | -46     | 4        |
| 1H-Pyrrole-2,5-dione, 3-ethenyl-4-methyl-                        | 0.86   | 1              | 76     | -35     | -41      | -71     | -34      |
| 1,3,7,9-Tetramethyluric acid                                     | -0.08  | 4              | 77     | -82     | -85      | -47     | 7        |
| Isoquinoline                                                     | 2.08   | 1              | 83     | -60     | -27      | -52     | -8       |
| Pyridine, 4-(diphenylmethyl)-                                    | 4.77   | 1              | 117    | -76     | -74      | -48     | -83      |
| 2-Propenenitrile, 3,3-diphenyl-                                  | 3.22   | 1              | 119    | 4       | 663      | -51     | 77       |
| Benzothiazole                                                    | 2.01   | 1              | 131    | -15     | -11      | -60     | -55      |
| 4-Amino-6-hydroxypyrimidine                                      | -0.87  | 3              | 161    | 9       | 33       | -34     | -32      |

| Compound Name                                                | Log(P) | No. of N Atoms | AcMBR  |         |          | AnMBR   |          |
|--------------------------------------------------------------|--------|----------------|--------|---------|----------|---------|----------|
|                                                              |        |                | I (%C) | II (%C) | III (%C) | II (%C) | III (%C) |
| Benzonitrile                                                 | 1.56   | 1              | 162    | -50     | -66      | -69     | -30      |
| 2-Pyrrolidinone                                              | -0.85  | 1              | 187    | -46     | -13      | -77     | -85      |
| Benzhydryl isothiocyanate                                    | 5.09   | 1              | 203    | 24      | 282      | -13     | 374      |
| Primidone                                                    | 0.91   | 2              | 220    | 121     | 43       | -62     | -2       |
| Benzenamine, 3-chloro-N-methyl-                              | 2.11   | 1              | 231    | -30     | 323      | 39      | 244      |
| 1,2-Benzenediacetonitrile                                    | 1.94   | 2              | 235    | 40      | 74       | -43     | 110      |
| 2,6-Xylidine                                                 | 1.84   | 1              | 291    | -59     | -61      | -74     | -57      |
| 4-(2-(4-Formylphenyl)ethenyl)pyridine                        | -      | 1              | 318    | 24      | 19       | -83     | -75      |
| Benzenesulfonamide, N-ethyl-2-methyl-                        | 1.62   | 1              | 336    | -32     | 82       | -53     | 109      |
| 2-(Methylmercapto)benzothiazole                              | 3.15   | 1              | 374    | 17      | -17      | -72     | 140      |
| (1S,4S,9aS)-4-Allyl-1-ethyl-10,11-dihydro-1H-quinolizine     | -      | 1              | 378    | 40      | 99       | 148     | 1127     |
| 3-Phenylpyrazin-2-ol                                         | -      | 2              | 380    | 10      | 16       | -25     | 313      |
| Propanediamide, 2-ethyl-2-phenyl-                            | 0.13   | 2              | 386    | 167     | 195      | -53     | 17       |
| Cyclohexanecarboxamide, N-ethyl-5-methyl-2-(1-methylethyl)-  | 3.89   | 1              | 464    | 24      | 98       | -53     | 77       |
| Pyridine, 2,3,5-trimethyl-                                   | 1.35   | 1              | 526    | -5      | 21       | 25      | 255      |
| Fluconazole                                                  | 0.50   | 6              | 562    | 96      | 153      | -52     | 136      |
| Acridine                                                     | 3.40   | 1              | 576    | 362     | 11       | -52     | 4        |
| Phenytoin                                                    | 2.36   | 2              | 609    | 53      | 76       | -66     | 53       |
| 2,3-Dichlorobenzonitrile                                     | 2.93   | 1              | 618    | 118     | 71       | -41     | 40       |
| 2,6-Diphenyl-4-methyl-1,4-dihydropyridine-3,5-dicarbonitrile | -      | 3              | 690    | 179     | 82       | -78     | -68      |
| 6-Ethoxy-1,2,3,4-tetrahydro-2,2,4-trimethylquinoline         | 3.95   | 1              | 701    | -5      | 65       | -56     | 347      |
| Carbamazepine                                                | 2.45   | 2              | 721    | 29      | 373      | -78     | 219      |
| Benzenesulfonamide, 2-methyl-                                | 0.84   | 1              | 1082   | 50      | 121      | -45     | 73       |
| Succinimide                                                  | -0.67  | 1              | 1107   | -9      | 57       | -81     | -87      |
| Benzenesulfonamide, 4-methyl-                                | 0.82   | 1              | 1204   | 72      | 127      | -45     | 50       |
| 1H-Benzotriazole                                             | 1.44   | 3              | 1342   | 2157    | 2947     | 144     | 154      |
| Gabapentin                                                   | -1.10  | 1              | 1870   | 209     | 489      | -49     | 260      |
| 2-Pentanamine, N-ethyl-4-methyl-                             | -      | 1              | 2649   | -21     | 10       | -50     | 194      |
| 5-Isopropyl-3,8-dimethylazulene-1-carbonitrile               | 3.88   | 1              | New    | New     | New      | n.d.    | n.d.     |
| Pyridine, 2-phenyl-                                          | 2.63   | 1              | New    | New     | New      | n.d.    | n.d.     |
| 2-Benzothiazolamine, 5,6-dimethyl-                           | 2.17   | 2              | New    | New     | New      | n.d.    | n.d.     |
| Sydnone, 3-(2-methylphenyl)-                                 | 1.49   | 2              | New    | New     | New      | n.d.    | n.d.     |
| 4H-1,2,4-Triazol-3-amine, 4-ethyl-                           | 0.03   | 4              | New    | New     | New      | n.d.    | n.d.     |
| 2,1-Benzisoxazole, 7-ethyl-3-methyl-                         | 2.79   | 1              | New    | New     | New      | n.d.    | n.d.     |
| N-Methylmaleimide                                            | -0.58  | 1              | New    | New     | New      | n.d.    | n.d.     |
| 5,6,7,8-Tetrahydroindolizine                                 | NA     | 1              | New    | New     | New      | n.d.    | n.d.     |
| Oxcarbazepine                                                | 2.17   | 2              | New    | New     | New      | n.d.    | n.d.     |
| 4-(4-Chlorophenyl)-2-pyrrolidinone                           | 2.25   | 1              | New    | New     | New      | n.d.    | n.d.     |
| 5-Acetyl-4-methylthiazole                                    | 1.15   | 1              | New    | New     | New      | n.d.    | n.d.     |
| Benzene, 1-azido-3-methoxy-                                  | 1.63   | 3              | New    | New     | New      | n.d.    | n.d.     |
| Pyridine, 3-ethyl-                                           | 1.66   | 1              | n.d.   | n.d.    | n.d.     | New     | New      |
| Ethanone, 1-(3-pyridinyl)-                                   | NA     | 1              | n.d.   | n.d.    | n.d.     | New     | New      |
| 3-Pyridinol, 2-methyl-                                       | 0.03   | 1              | n.d.   | n.d.    | n.d.     | New     | New      |
| 2-tert-Butylthiazole                                         | 3.1    | 1              | n.d.   | n.d.    | n.d.     | New     | New      |
| 5-Thiazoleethanol, 4-methyl-                                 | 1.06   | 1              | n.d.   | n.d.    | n.d.     | New     | New      |
| Quinoline, 1,2,3,4-tetrahydro-2-methyl-                      | NA     | 1              | n.d.   | n.d.    | n.d.     | New     | New      |
| 5,6-Dimethyl-2-benzimidazolinone                             | 0.71   | 2              | n.d.   | n.d.    | n.d.     | New     | New      |
| Carbonic acid, monoamide, N-butyl-, allyl ester              | NA     | 1              | n.d.   | n.d.    | n.d.     | New     | New      |
| 2,2-Dimethyl-N-phenethylpropionamide                         | 1.13   | 1              | n.d.   | n.d.    | n.d.     | New     | New      |
| 5-(Thiophen-2-yl)-1,2-oxazole-3-carboxylic acid              | 2.13   | 1              | n.d.   | n.d.    | n.d.     | New     | New      |
| 2-(2-Oxo-2H-pyridin-1-yl)benzoic acid                        | NA     | 1              | n.d.   | n.d.    | n.d.     | New     | New      |
| L-Cysteine, S-(diphenylmethyl)-                              | 2.46   | 1              | n.d.   | n.d.    | n.d.     | New     | New      |

**Note:** “\*” – The compound was one of the 25 nitrogen-containing compounds meeting selection criteria described in text. “NA” – A Log P value was not available in the U.S. EPA Comptox Dashboard.; “New” – The compound was not detected in the influents but was detected in the permeate.; “n.d.” – The compound was not detected.

**Table S23.** Database of the 30 tentatively identified compounds containing at least one sulfur atom which were common among all the influents (from treatment cycle I, II, and III).

| Compound Name                                   | Log(P) | No. of S Atoms | AeMBR  |         |          | AnMBR   |          |
|-------------------------------------------------|--------|----------------|--------|---------|----------|---------|----------|
|                                                 |        |                | I (%C) | II (%C) | III (%C) | II (%C) | III (%C) |
| *Thiophene, 2-formyl-2,3-dihydro-               | 1.49   | 1              | -100   | -100    | -100     | -100    | -100     |
| *Benzothiazole, 6-methoxy-2-methyl-             | 2.25   | 1              | -100   | -100    | -100     | -100    | -100     |
| *4-Methyl-1,2,3-trithiolane                     | NA     | 3              | -100   | -100    | -100     | -100    | -100     |
| *Cyclic octaatomic sulfur                       | NA     | 8              | -100   | -100    | -100     | -96     | -99      |
| Hexathiepane                                    | 2.58   | 6              | -100   | -100    | -100     | -94     | -48      |
| *5-Methyl-1,2,3,4-tetrathiane                   | 3.33   | 4              | -100   | -100    | -100     | -93     | -93      |
| *3H-1,2-Benzodithiol-3-one                      | 2.73   | 2              | -100   | -100    | -100     | -91     | -95      |
| *Butanenitrile, 4-(methylthio)-                 | 0.32   | 1              | -100   | -100    | -100     | -89     | -81      |
| *2(5H)-Thiophenone, 5-methyl-                   | -0.06  | 1              | -100   | -100    | -100     | -87     | -86      |
| 1-(2-Thienyl)-1-propanone                       | 2.13   | 1              | -100   | -100    | -100     | -69     | 24       |
| Thiazolidine, 2-ethyl-                          | 1.43   | 1              | -100   | -100    | -100     | -64     | 91       |
| *Tetrasulfide, dimethyl                         | 3.34   | 4              | -100   | -100    | -100     | -98     | -95      |
| *Dimethyl trisulfide                            | 2.75   | 3              | -98    | -99     | -98      | -98     | -98      |
| *Acetamide, N-[4-hydroxy-3-(methylthio)phenyl]- | 1.62   | 1              | -84    | -97     | -97      | -97     | -88      |
| *Benzenemethanethiol                            | 2.45   | 1              | -83    | -98     | -99      | -77     | -89      |
| *2-Acetyl-5-methylthiophene                     | 2.09   | 1              | -61    | -85     | -90      | -71     | -57      |
| Benzothiazole                                   | 2.01   | 1              | 131    | -15     | -11      | -60     | -55      |
| Benzhydryl isothiocyanate                       | 5.09   | 1              | 203    | 24      | 282      | -13     | 374      |
| Diphenyl sulfone                                | 2.40   | 1              | 206    | 3       | 32       | -51     | 24       |
| Benzenesulfonamide, N-ethyl-2-methyl-           | 1.62   | 1              | 336    | -32     | 82       | -53     | 109      |
| 2-(Methylmercapto)benzothiazole                 | 3.15   | 2              | 374    | 17      | -17      | -72     | 140      |
| Benzenesulfonamide, 2-methyl-                   | 0.84   | 1              | 1082   | 50      | 121      | -45     | 73       |
| Benzenesulfonamide, 4-methyl-                   | 0.82   | 1              | 1204   | 72      | 127      | -45     | 50       |
| 2-Benzothiazolamine, 5,6-dimethyl-              | 2.17   | 1              | New    | New     | New      | n.d.    | n.d.     |
| S-Methyl methanethiosulphonate                  | 1.6    | 2              | New    | New     | New      | n.d.    | n.d.     |
| 5-Acetyl-4-methylthiazole                       | 1.15   | 1              | New    | New     | New      | n.d.    | n.d.     |
| 2-tert-Butylthiazole                            | 3.1    | 1              | n.d.   | n.d.    | n.d.     | New     | New      |
| 5-Thiazoleethanol, 4-methyl-                    | 1.06   | 1              | n.d.   | n.d.    | n.d.     | New     | New      |
| 5-(Thiophen-2-yl)-1,2-oxazole-3-carboxylic acid | 2.13   | 1              | n.d.   | n.d.    | n.d.     | New     | New      |
| L-Cysteine, S-(diphenylmethyl)-                 | 2.46   | 1              | n.d.   | n.d.    | n.d.     | New     | New      |

**Note:** “\*” – The compound was one of the 13 sulfur-containing compounds meeting selection criteria described in text. “NA” – A Log P value was not available in the U.S. EPA Comptox Dashboard.; “New” – The compound was not detected in the influents but was detected in the permeate.; “n.d.” – The compound was not detected.

**Table S24.** Index of the EPA Comptox databases used to define each product use category.

| <b>Product Use Category</b>                                                   | <b>Title of EPA Comptox List</b>                                                                                                                                                                        |
|-------------------------------------------------------------------------------|---------------------------------------------------------------------------------------------------------------------------------------------------------------------------------------------------------|
| Metabolite/Transformation Product                                             | MTox700; NISTSRM1950; WETMORE2015; HSDBTPS; MSMLS; SOLNSLMCTPS; METABWKBN; METXBIODB                                                                                                                    |
| Odorant/Aroma Compound                                                        | VOLATILOME; FLAVORNET; POLYPHENOLS; PHENOLEXP; FOODVOLATILES                                                                                                                                            |
| Plastic Related                                                               | BISPHENOLS; ECHAPLASTICS; FOODPLASTICS; CPPDBLISTA; CSSEXTRACTS; CECTOYS; CPPDBLISTB; PLASTICMAP                                                                                                        |
| Consumer Product                                                              | EPACONS                                                                                                                                                                                                 |
| Food Contact Substance                                                        | FDACEDI; FOODCONTACTSDB; FOODPLASTICS                                                                                                                                                                   |
| Cosmetic Ingredient                                                           | HAIRDYES; TATTOOINK; COSMOSDB; EUCOSMETICS                                                                                                                                                              |
| Pharmaceutical/Drug                                                           | FDAMDD; ANTIBIOTICS; ITNANTIBIOTIC; FDAORANGE; GREEKPHARMA; LUXPHARM; ANTUPHTW; PSYCHOCANNAB; TRANSPORTAL; UOATARGPHARMA; VETDRUGPCDL; VETDRUGS; WIKINSAIDSHIGHRESNPS; SWISSPHARMA; DRUGBANKSWG; DRUGV2 |
| Inert Ingredient                                                              | PESTINERTS; INERTNONFOOD                                                                                                                                                                                |
| Food Additive                                                                 | WIKIFLAVORS; FDAFOODSUBS                                                                                                                                                                                |
| Phermones/Semiochemicals                                                      | PHEROBASE                                                                                                                                                                                               |
| Toxin                                                                         | MYCOTOX2; NATOXAQ; HUMANBLOOD; PHYTOTOXINS; T3DB                                                                                                                                                        |
| Solvent                                                                       | WIKISOLVENTS; PARISIII                                                                                                                                                                                  |
| Pesticide/Biocide/Insect Repellant/Antifungal                                 | EDSP21LIST1; EUBIOCIDES; LUXPEST; PESTHHBS; SWISSPEST; WIKIANTIFUNGALS; WIKIINSECTICIDES; EPABIOPESTICIDES; PPDB; SWISSPEST19; EPAOPPIN; EPAPCS; NPINSECT                                               |
| Oil Related (hydraulic fracturing, oil field additive, motor fuel ingredient) | CALWATERBDS; MOTORFUELS; EPAHFRTABLE2; EPAHFR; PRODWATER                                                                                                                                                |
| Tobacco/Cigarette/Vaping Related                                              | VAPETERPENES; VATERPENES; SLTChemDB; THSMOKE; UNCTCORS; CIGARETTES                                                                                                                                      |
| Extractable or Leachable from Pharmaceutical Product                          | ELSIE                                                                                                                                                                                                   |
| Other                                                                         | NISTSRM2585; PEROXIDESB; CIDYES; STORAGETANKS; PAHLIST; PEROXIDESD; SWISSLIPIDS2022; LIPIDMAPSv2                                                                                                        |
| Disinfection Byproduct                                                        | DBP; CHLORINETPS                                                                                                                                                                                        |
| Detected in Recycled Tire Crumb                                               | TIRECRUMB                                                                                                                                                                                               |
| Water Distribution Leachable Substance                                        | EXTRACTPIPES                                                                                                                                                                                            |
| Flame Retardant                                                               | FLAMERETARD; FRFULLLIST; FRLIKELY; OFRLIKELY                                                                                                                                                            |
| Antimicrobial                                                                 | ANITMICROB2; ANTIMICROBIALS; WIKIANTISEPTICS                                                                                                                                                            |
| Antioxidant                                                                   | PHENANTIOX; WIKIANTIOXIDANTS                                                                                                                                                                            |
| Surfactant                                                                    | ALLSURFACTANTS; EIUBASURF                                                                                                                                                                               |
| Industrial Chemical or Manufacturing Waste                                    | HUMANNEUROTOX                                                                                                                                                                                           |



**Table S25.** Sixty-five tentatively identifiable compounds identified in the United States (US)

## Environmental Protection Agency (EPA) High Production Volume List

| CAS No.    | Compound Name                                                          |
|------------|------------------------------------------------------------------------|
| 95-14-7    | 1,2,3-Benzotriazole                                                    |
| 622-96-8   | 4-Ethyltoluene                                                         |
| 100-52-7   | Benzaldehyde                                                           |
| 108-95-2   | Phenol                                                                 |
| 62-53-3    | Aniline                                                                |
| 100-47-0   | Benzonitrile                                                           |
| 541-73-1   | 1,3-Dichlorobenzene                                                    |
| 872-50-4   | N-Methyl-2-pyrrolidone                                                 |
| 98-86-2    | Acetophenone                                                           |
| 616-45-5   | 2-Pyrrolidinone                                                        |
| 100-53-8   | Benzenemethanethiol                                                    |
| 90-05-1    | 2-Methoxyphenol                                                        |
| 526-75-0   | 2,3-Dimethylphenol                                                     |
| 104-88-1   | 4-Chlorobenzaldehyde                                                   |
| 87-62-7    | 2,6-Dimethylaniline                                                    |
| 95-16-9    | Benzothiazole                                                          |
| 102-76-1   | Triacetin                                                              |
| 334-48-5   | Decanoic acid                                                          |
| 80-46-6    | 4-(2-Methylbutan-2-yl)phenol                                           |
| 128-37-0   | Butylated hydroxytoluene                                               |
| 135-19-3   | 2-Naphthalenol                                                         |
| 90-43-7    | 2-Phenylphenol                                                         |
| 84-66-2    | Diethyl phthalate                                                      |
| 119-61-9   | Benzophenone                                                           |
| 88-19-7    | o-Toluenesulfonamide                                                   |
| 70-55-3    | 4-Toluenesulfonamide                                                   |
| 115-96-8   | Tris(2-chloroethyl) phosphate                                          |
| 120-51-4   | Benzyl benzoate                                                        |
| 13674-84-5 | Tris(2-chloroisopropyl)phosphate                                       |
| 104-66-5   | 1,2-Diphenoxyethane                                                    |
| 1222-05-5  | 1,3,4,6,7,8-Hexahydro-4,6,6,7,8,8-hexamethylcyclopenta[g]-2-benzopyran |
| 21145-77-7 | Tonalide                                                               |
| 6386-38-5  | Methyl 3,5-bis(tert-butyl)-4-hydroxyhydrocinnamate                     |
| 131-57-7   | 2-Hydroxy-4-methoxybenzophenone                                        |
| 3380-34-5  | Triclosan                                                              |
| 103-23-1   | Bis(2-ethylhexyl)hexanedioate                                          |
| 78-51-3    | Tris(2-butoxyethyl) phosphate                                          |
| 298-46-4   | Carbamazepine                                                          |
| 115-86-6   | Triphenyl phosphate                                                    |

| <b>CAS No.</b> | <b>Compound Name</b>                     |
|----------------|------------------------------------------|
| 57-41-0        | 5,5-Diphenylhydantoin                    |
| 94-28-0        | Triethylene glycol bis(2-ethylhexanoate) |
| 1948-33-0      | tert-Butylhydroquinone                   |
| 118-79-6       | 2,4,6-Tribromophenol                     |
| 83-67-0        | Theobromine                              |
| 100-44-7       | Benzyl chloride                          |
| 88-06-2        | 2,4,6-Trichlorophenol                    |
| 96-76-4        | 2,4-Di-tert-butylphenol                  |
| 122-40-7       | alpha-Amyl cinnamaldehyde                |
| 80-05-7        | Bisphenol A                              |
| 110-93-0       | 6-Methyl-5-hepten-2-one                  |
| 873-94-9       | 3,3,5-Trimethylcyclohexanone             |
| 78-70-6        | Linalool                                 |
| 121-33-5       | 4-Hydroxy-3-methoxybenzaldehyde          |
| 58-08-2        | Caffeine                                 |
| 58-55-9        | Theophylline                             |
| 101-84-8       | Diphenyl oxide                           |
| 131-11-3       | Dimethyl phthalate                       |
| 50-78-2        | Aspirin                                  |
| 5466-77-3      | Octinoxate                               |
| 106-44-5       | p-Cresol                                 |
| 101-86-0       | 2-(Phenylmethylene)octanal               |
| 98-82-8        | Cumene                                   |
| 122-99-6       | 2-Phenoxyethanol                         |
| 101-72-4       | N-Isopropyl-N'-phenyl-p-phenylenediamine |
| 108-46-3       | Resorcinol                               |

## REFERENCES

1. Suárez, S.; Carballa, M.; Omil, F.; Lema, J. M. How are pharmaceutical and personal care products (PPCPs) removed from urban wastewaters?. *Rev. Environ. Sci. Biotechnol.* **2008**, *7*, 125-138.
2. Office of Emergency and Remedial Response. (1991, December). *Risk Assessment Guidance for Superfund: Volume I: Human Health Evaluation Manual (Part B, Development of Preliminary Remediation Goals)*. (EPA-540-R-92-003). United States Environmental Protection Agency. Retrieved: May 31, 2023 from <https://semspub.epa.gov/work/HQ/156739.pdf>
3. Mladenov, N.; Dodder, N. G.; Steinberg, L.; Richardot, W.; Johnson, J.; Martincigh, B. S.; Buckley, C.; Lawrence, T.; Hoh, E. Persistence and removal of trace organic compounds in centralized and decentralized wastewater treatment systems. *Chemosphere*. 2021, *286*, 131621.
