# Supplementary material for: Comparison of Trace Organic Chemical Removal Efficiencies between Aerobic and Anaerobic Membrane Bioreactors Treating Municipal Wastewater
Source: PubMed Central journal article supplement — ACS ES T Water. 2024 Mar 18;4(4):1381–92. doi: 10.1021/acsestwater.3c00542 (PMC11019542; doi:10.1021/acsestwater.3c00542), 2024-03-18
Supplement: ew3c00542_si_002.pdf [file ew3c00542_si_002.pdf]

## Supporting Information II

### Comparison of Trace Organic Chemical Removal Efficiencies between Aerobic and Anaerobic Membrane Bioreactors Treating Municipal Wastewater

Jade L. Johnson<sup>†‡</sup>, Nathan G. Dodder<sup>†‡</sup>, Natalie Mladenov<sup>§\*</sup>, Lauren Steinberg<sup>§‡</sup>, William Richardot<sup>‡</sup>, Eunha Hoh<sup>†\*</sup>

<sup>†</sup> School of Public Health, San Diego State University, San Diego, California 92182 United States; <sup>‡</sup> San Diego State University Research Foundation, San Diego, California 92182 United States; <sup>§</sup> Department of Civil, Construction, and Environmental Engineering, San Diego State University, San Diego, California 92182, United States.

\* Corresponding author email: Eunha Hoh (ehoh@sdsu.edu) and Natalie Mladenov (nmladenov@sdsu.edu)

**Supporting Information II Table of Contents** **Page**

---

Number of Pages: 354

**Mass spectra of the 351 tentatively identified compounds** S3-S354

# 1H-Pyrrole-2,5-dione, 3-ethyl-4-methyl-

1st Dimension R.T. = 1008.2  
2nd Dimension R.T. = 2.072  
Quant Mass(es) = 139  
S/N = 493.10  
Area = 103392  
Height = 11179  
Similarity = 750

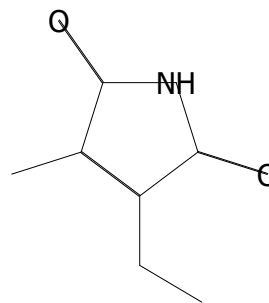

Peak Apex - sample "AnBxr B (20191121):1", peak 2097, at 1008.2 , 2.072 sec , sec (Spec # 80344)

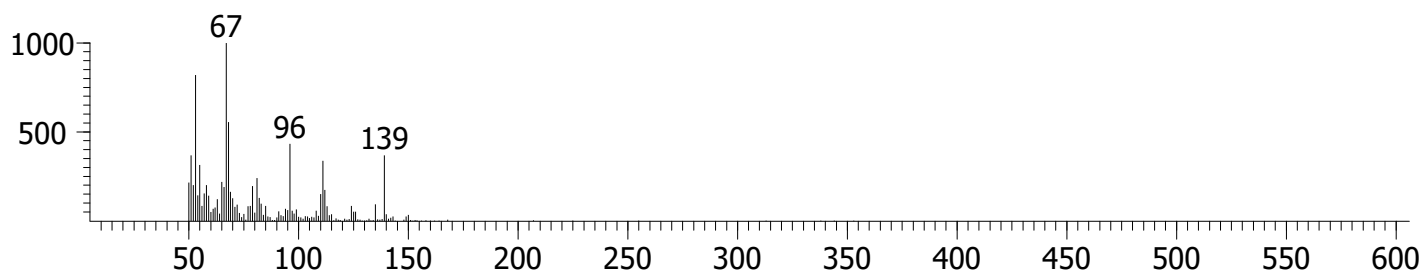

Peak True - sample "AnBxr B (20191121):1", peak 2097, at 1008.2 , 2.072 sec , sec (Spec # 80344)

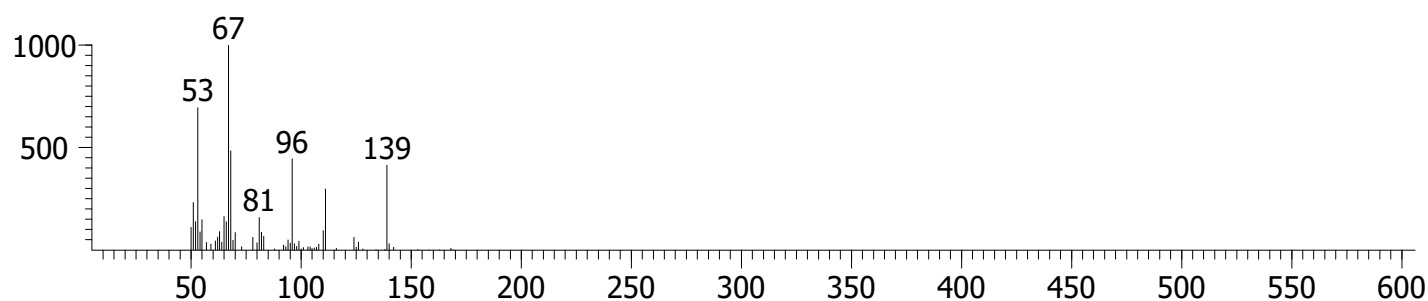

Library Hit - similarity 750, "1H-Pyrrole-2,5-dione, 3-ethyl-4-methyl-"

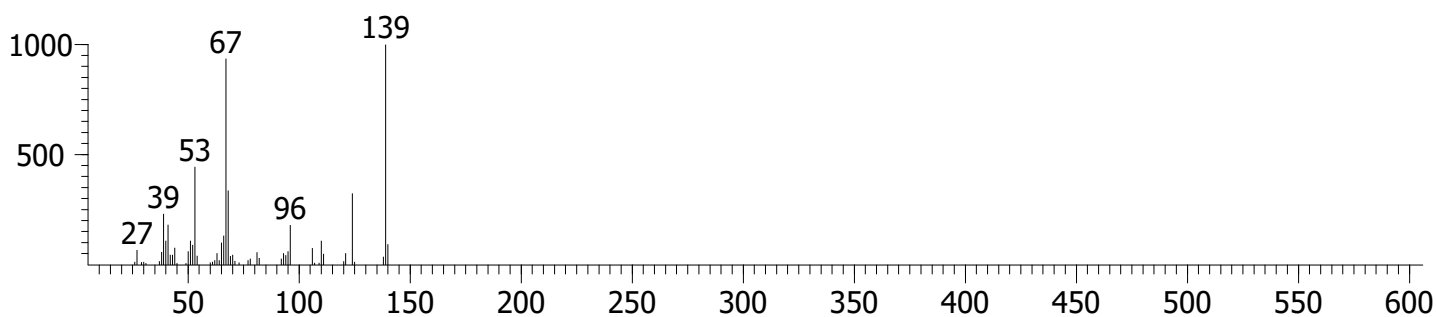

| Hit | Name                                                   | Similarity | Probability | CAS        | Library | Formula | Weight |
|-----|--------------------------------------------------------|------------|-------------|------------|---------|---------|--------|
| 1   | 1H-Pyrrole-2,5-dione, 3-ethyl-4-methyl-                | 750        | 5051        | 20189-42-8 | mainlib | C7H9NO2 | 139    |
| 2   | Piperidine, 1-methyl,4-methylene-                      | 690        | 896         | 13669-28-8 | mainlib | C7H13N  | 111    |
| 3   | 2-Cyclopenten-1-one, 2-methyl-                         | 680        | 2313        | 1120-73-6  | replib  | C6H8O   | 96     |
| 4   | 2,5-Methano-2H-furo[3,2-b]pyrrole, hexahydro-4-methyl- | 669        | 381         | 38225-15-9 | mainlib | C8H13NO | 139    |
| 5   | 4-Cyclopropyl-4-methylpyrrolidin-2-one                 | 666        | 337         | 0-00-0     | mainlib | C8H13NO | 139    |

# Acetophenone, 4'-amino-

1st Dimension R.T. = 1018.69  
2nd Dimension R.T. = 2.165  
Quant Mass(es) = 120  
S/N = 1977.0  
Area = 392119  
Height = 42506  
Similarity = 936

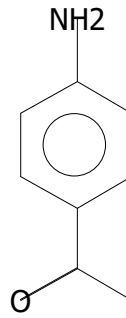

Peak Apex - sample "AnBxr B (20191121):1", peak 2161, at 1018.69 , 2.165 sec , sec (Spec # 81948)

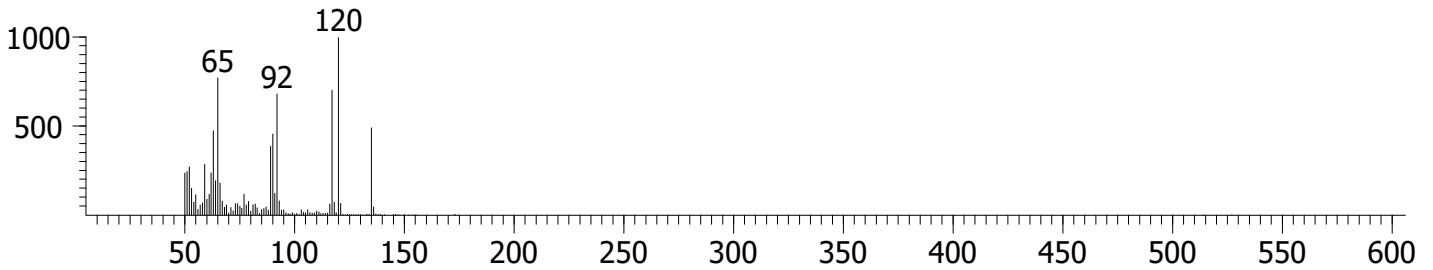

Peak True - sample "AnBxr B (20191121):1", peak 2161, at 1018.69 , 2.165 sec , sec (Spec # 81948)

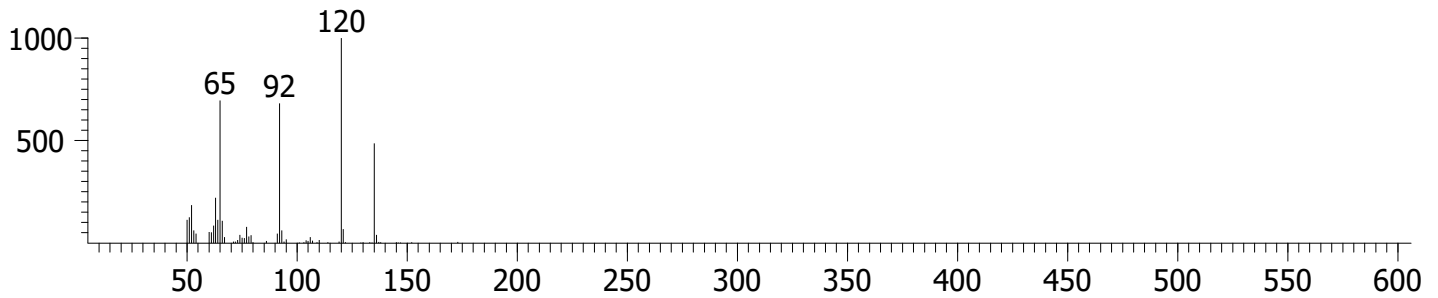

Library Hit - similarity 936, "Acetophenone, 4'-amino-"

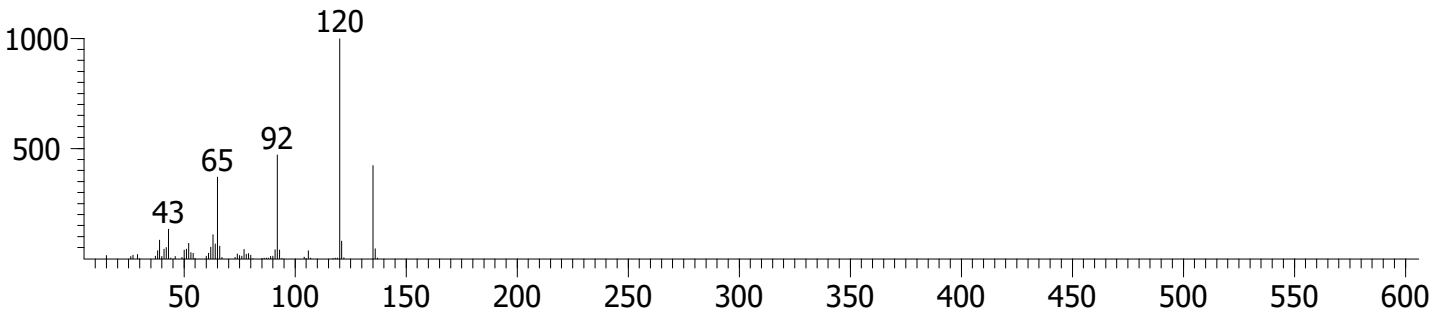

| Hit | Name                         | Similarity | Probability | CAS      | Library | Formula | Weight |
|-----|------------------------------|------------|-------------|----------|---------|---------|--------|
| 1   | Acetophenone, 4'-amino-      | 936        | 7127        | 99-92-3  | replib  | C8H9NO  | 135    |
| 2   | Acetophenone, 4'-amino-      | 922        | 3853        | 99-92-3  | mainlib | C8H9NO  | 135    |
| 3   | Ethanone, 1-(2-aminophenyl)- | 921        | 3703        | 551-93-9 | mainlib | C8H9NO  | 135    |
| 4   | Ethanone, 1-(2-aminophenyl)- | 910        | 2135        | 551-93-9 | replib  | C8H9NO  | 135    |
| 5   | Acetophenone, 4'-amino-      | 907        | 7127        | 99-92-3  | replib  | C8H9NO  | 135    |

# Benzenamine, 3-chloro-N-methyl-

1st Dimension R.T. = 1001.2  
2nd Dimension R.T. = 1.973  
Quant Mass(es) = 140  
S/N = 5731.3  
Area = 595862  
Height = 74951  
Similarity = 906

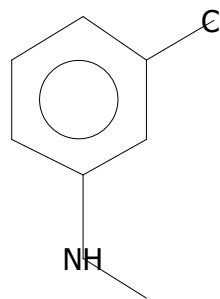

Peak Apex - sample "AnMbr B (20191120):1", peak 1632, at 1001.2 , 1.973 sec , sec (Spec # 79269)

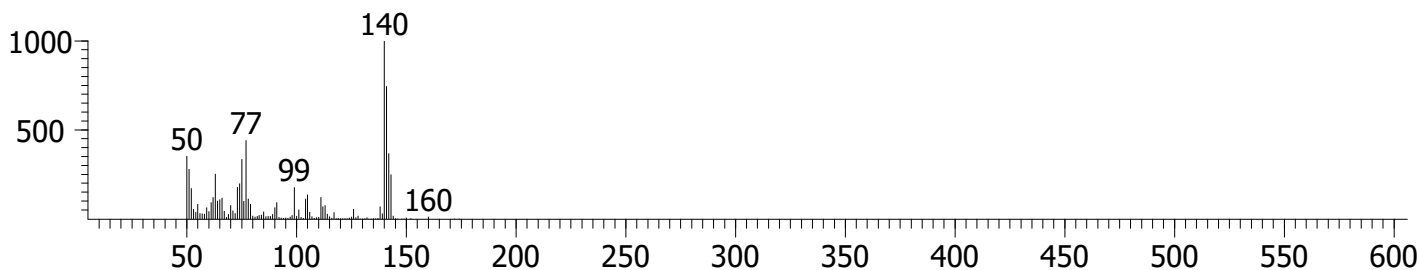

Peak True - sample "AnMbr B (20191120):1", peak 1632, at 1001.2 , 1.973 sec , sec (Spec # 79269)

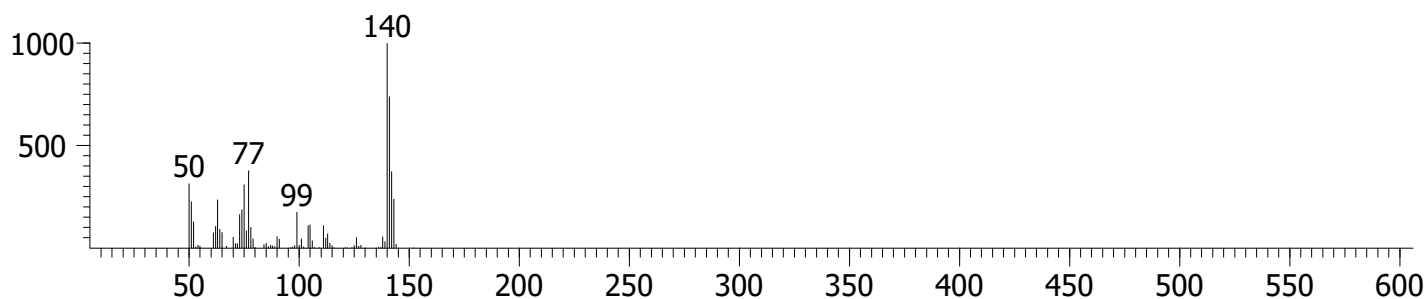

Library Hit - similarity 906, "Benzenamine, 3-chloro-N-methyl-"

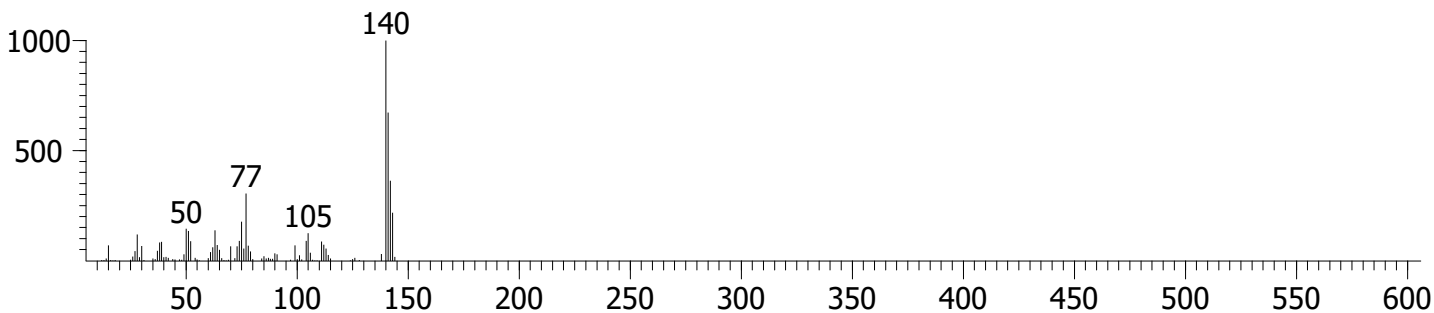

| Hit | Name                                        | Similarity | Probability | CAS        | Library | Formula     | Weight |
|-----|---------------------------------------------|------------|-------------|------------|---------|-------------|--------|
| 1   | Benzenamine, 3-chloro-N-methyl-             | 906        | 5234        | 7006-52-2  | mainlib | C7H8ClN     | 141    |
| 2   | Benzenamine, 2-chloro-N-methyl-             | 891        | 3172        | 932-32-1   | mainlib | C7H8ClN     | 141    |
| 3   | Benzenamine, 4-chloro-N-methyl-             | 871        | 1444        | 932-96-7   | mainlib | C7H8ClN     | 141    |
| 4   | Urea, 1-(3-chlorophenyl)-1-methyl-3-phenyl- | 736        | 54          | 67309-72-2 | mainlib | C14H13ClN2O | 260    |
| 5   | Benzenamine, 3-chloro-4-methyl-             | 707        | 15          | 95-74-9    | mainlib | C7H8ClN     | 141    |

# Phenol, 2-methyl-5-(1-methylethyl)-

1st Dimension R.T. = 994.206  
2nd Dimension R.T. = 1.676  
Quant Mass(es) = 135  
S/N = 22046  
Area = 5886671  
Height = 807393  
Similarity = 918

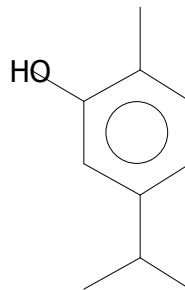

Peak Apex - sample "INF B Comp 091919 (20191122):1", peak 1799, at 994.206 , 1.676 sec , sec (Spec # 78164)

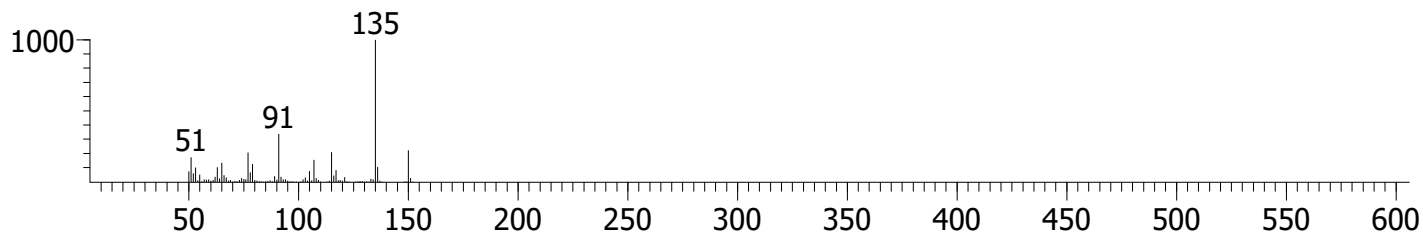

Peak True - sample "INF B Comp 091919 (20191122):1", peak 1799, at 994.206 , 1.676 sec , sec (Spec # 78164)

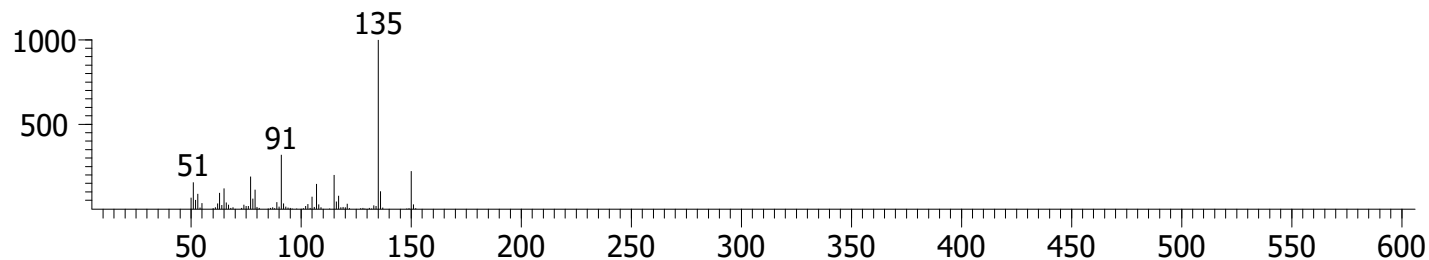

Library Hit - similarity 918, "Phenol, 2-methyl-5-(1-methylethyl)-"

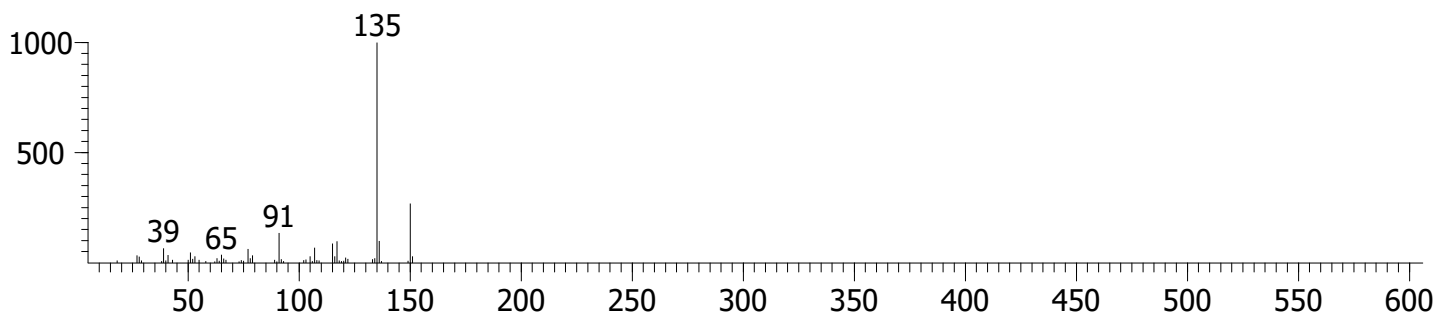

| Hit | Name                                | Similarity | Probability | CAS       | Library | Formula                           | Weight |
|-----|-------------------------------------|------------|-------------|-----------|---------|-----------------------------------|--------|
| 1   | Phenol, 2-methyl-5-(1-methylethyl)- | 918        | 3729        | 499-75-2  | mainlib | C <sub>10</sub> H <sub>14</sub> O | 150    |
| 2   | Thymol                              | 916        | 3439        | 89-83-8   | mainlib | C <sub>10</sub> H <sub>14</sub> O | 150    |
| 3   | 3-Methyl-4-isopropylphenol          | 873        | 758         | 3228-02-2 | mainlib | C <sub>10</sub> H <sub>14</sub> O | 150    |
| 4   | Benzenemethanol, 2,4,6-trimethyl-   | 864        | 550         | 1197-01-9 | mainlib | C <sub>10</sub> H <sub>14</sub> O | 150    |
| 5   | Phenol, 2-ethyl-4,5-dimethyl-       | 860        | 465         | 2219-78-5 | mainlib | C <sub>10</sub> H <sub>14</sub> O | 150    |

## 5H-1-Pyridine

1st Dimension R.T. = 1011.7  
2nd Dimension R.T. = 2.284  
Quant Mass(es) = 117  
S/N = 128960  
Area = 98201869  
Height = 6455334  
Similarity = 926

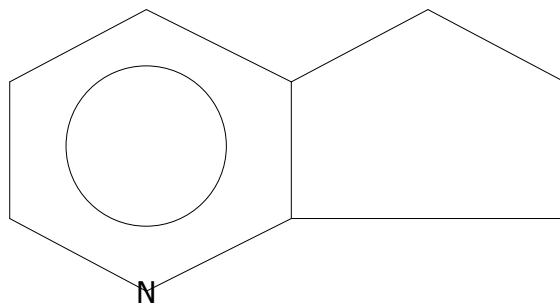

Peak Apex - sample "INF B Comp 091919 (20191122):1", peak 1883, at 1011.7 , 2.284 sec , sec (Spec # 80906)

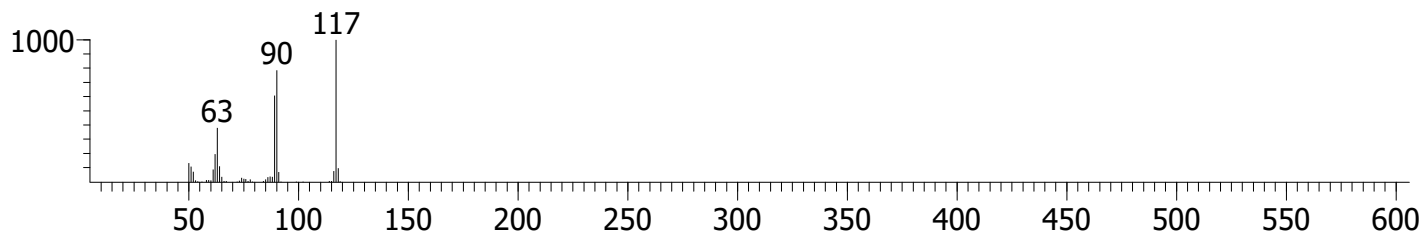

Peak True - sample "INF B Comp 091919 (20191122):1", peak 1883, at 1011.7 , 2.284 sec , sec (Spec # 80906)

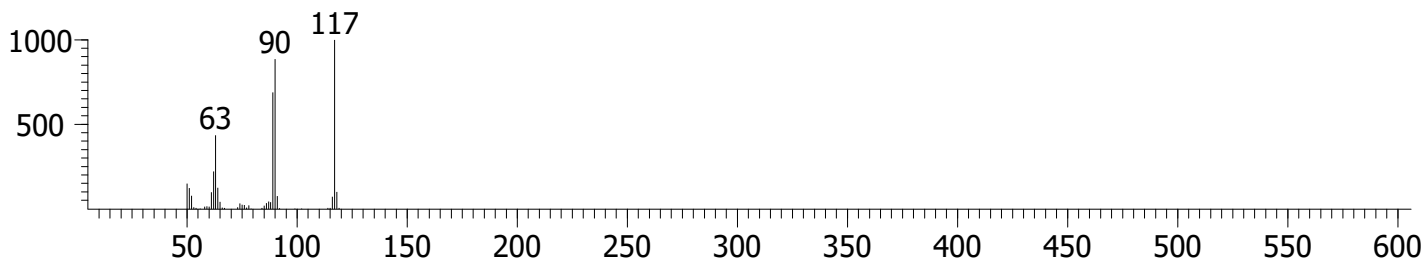

Library Hit - similarity 926, "5H-1-Pyridine"

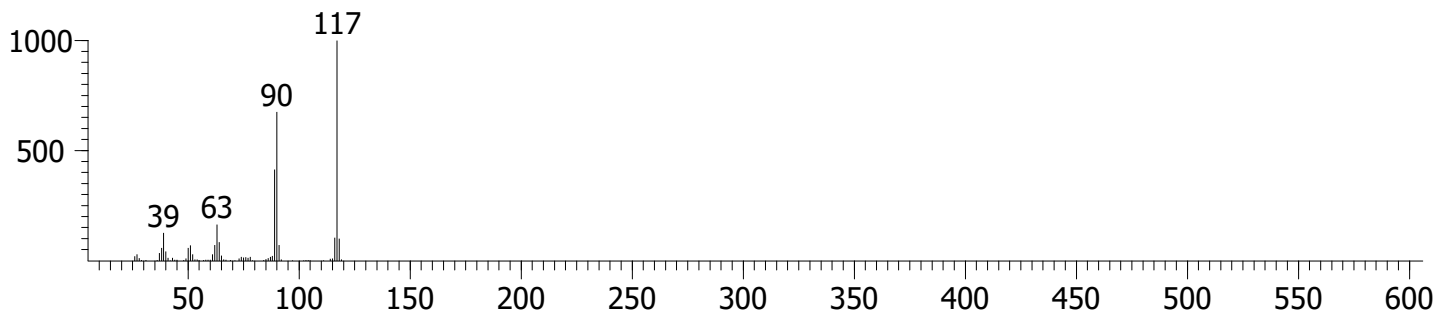

| Hit | Name             | Similarity | Probability | CAS        | Library | Formula | Weight |
|-----|------------------|------------|-------------|------------|---------|---------|--------|
| 1   | 5H-1-Pyridine    | 926        | 6374        | 270-91-7   | mainlib | C8H7N   | 117    |
| 2   | Indolizine       | 903        | 2327        | 274-40-8   | mainlib | C8H7N   | 117    |
| 3   | Indole           | 875        | 672         | 120-72-9   | mainlib | C8H7N   | 117    |
| 4   | N-Acetylindole   | 828        | 140         | 576-15-8   | mainlib | C10H9NO | 159    |
| 5   | 4-Ethynylaniline | 826        | 129         | 14235-81-5 | mainlib | C8H7N   | 117    |

# Pyrazine, 2,3-dimethyl-

1st Dimension R.T. = 483.498  
2nd Dimension R.T. = 1.465  
Quant Mass(es) = 108  
S/N = 521.17  
Area = 105236  
Height = 12195  
Similarity = 904

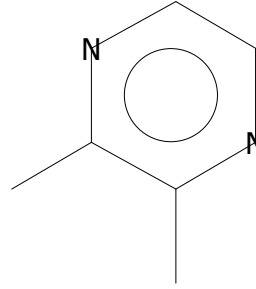

Peak Apex - sample "AerMBR A 092319 (20191119):1", peak 7, at 483.498 , 1.465 sec , sec (Spec # 752)

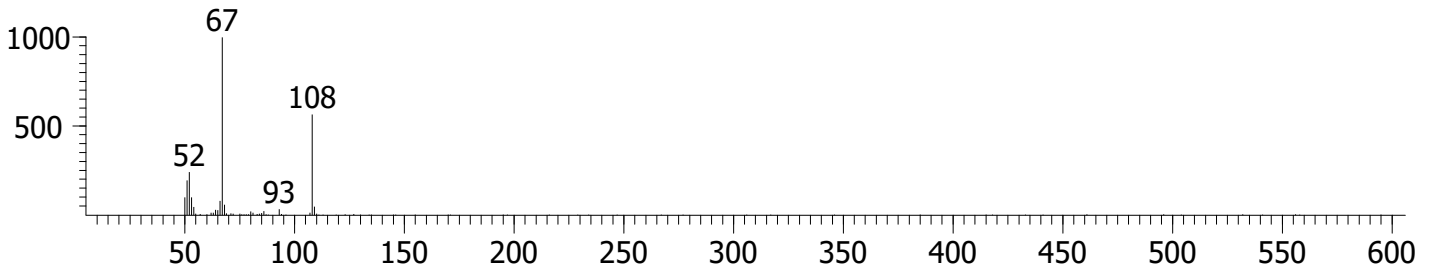

Peak True - sample "AerMBR A 092319 (20191119):1", peak 7, at 483.498 , 1.465 sec , sec (Spec # 752)

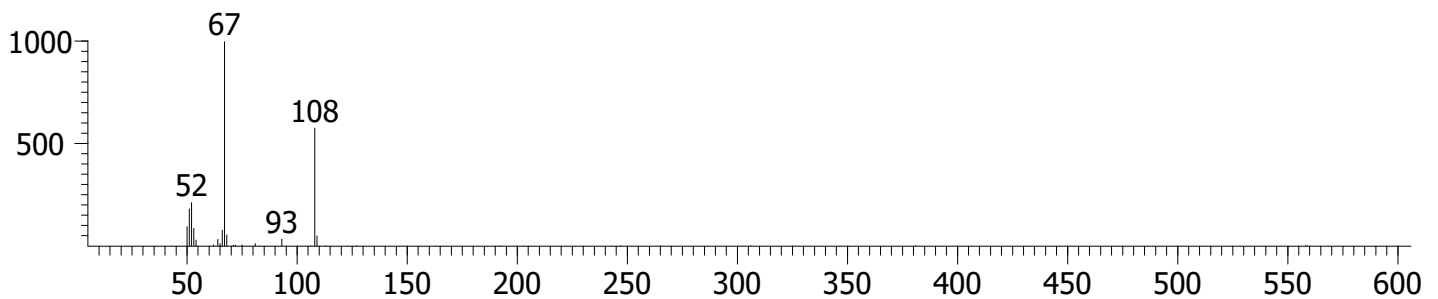

Library Hit - similarity 904, "Pyrazine, 2,3-dimethyl-"

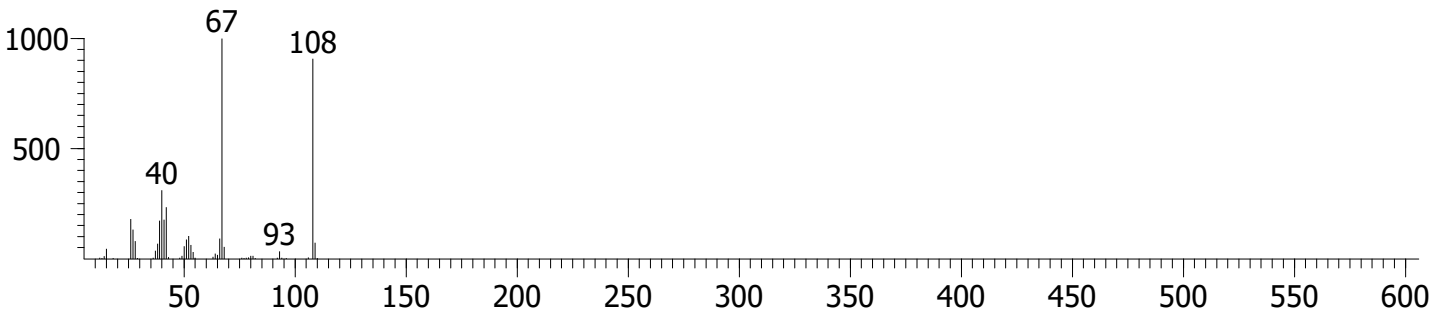

| Hit | Name                                                                | Similarity | Probability | CAS         | Library | Formula  | Weight |
|-----|---------------------------------------------------------------------|------------|-------------|-------------|---------|----------|--------|
| 1   | Pyrazine, 2,3-dimethyl-                                             | 904        | 9676        | 5910-89-4   | mainlib | C6H8N2   | 108    |
| 2   | Pyrimidine, 2,4-dimethyl-                                           | 752        | 263         | 14331-54-5  | mainlib | C6H8N2   | 108    |
| 3   | Pyridine, 2-ethoxy-                                                 | 643        | 17          | 14529-53-4  | mainlib | C7H9NO   | 123    |
| 4   | Ethanone, 1-[1-(3-methyl-4-furoxanyl)-5-methyl-1,2,3-triazol-4-yl]- | 630        | 11          | 296892-75-6 | mainlib | C8H9N5O3 | 223    |
| 5   | 2-(Cyclopenten-1-yl)acetic acid                                     | 623        | 8           | 13668-61-6  | mainlib | C7H10O2  | 126    |



## 2(5H)-Furanone

1st Dimension R.T. = 483.498  
2nd Dimension R.T. = 1.987  
Quant Mass(es) = 84  
S/N = 254.06  
Area = 101745  
Height = 10426  
Similarity = 898

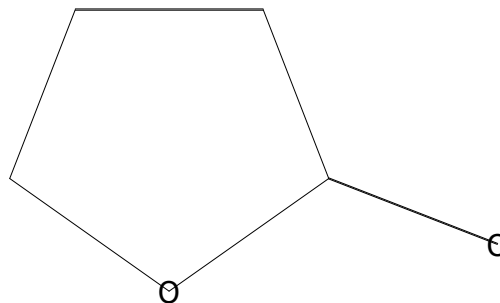

Peak Apex - sample "AerMBR A 092319 (20191119):1", peak 10, at 483.498 , 1.987 sec , sec (Spec # 831)

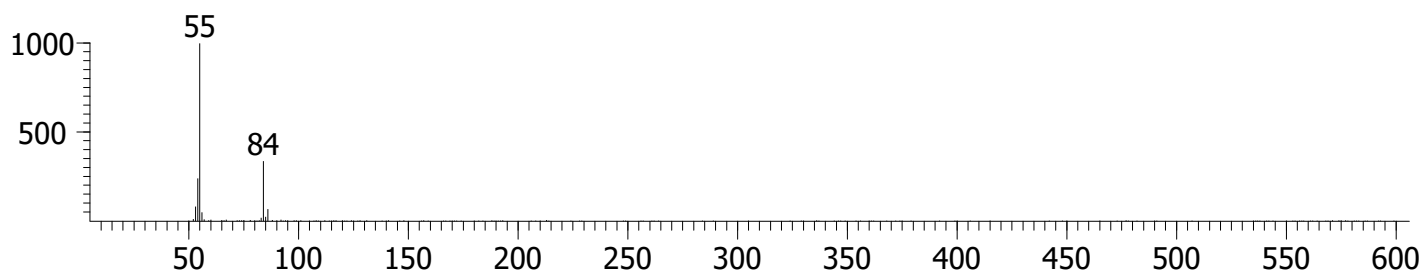

Peak True - sample "AerMBR A 092319 (20191119):1", peak 10, at 483.498 , 1.987 sec , sec (Spec # 831)

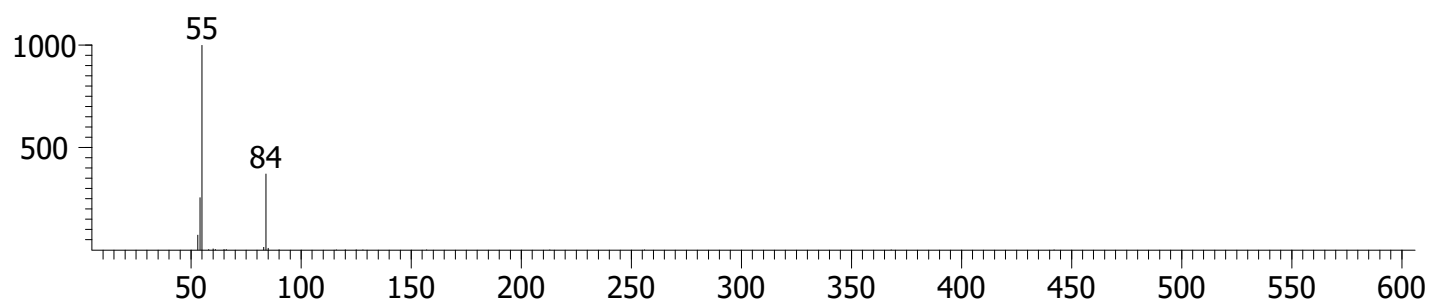

Library Hit - similarity 898, "2(5H)-Furanone"

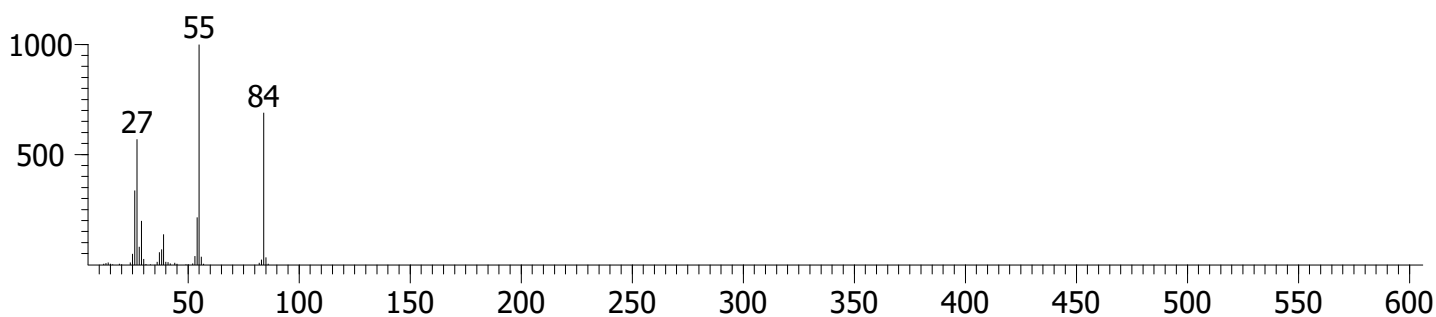

| Hit | Name                                        | Similarity | Probability | CAS        | Library | Formula | Weight |
|-----|---------------------------------------------|------------|-------------|------------|---------|---------|--------|
| 1   | 2(5H)-Furanone                              | 898        | 7559        | 497-23-4   | mainlib | C4H4O2  | 84     |
| 2   | 2(3H)-Furanone                              | 863        | 1897        | 20825-71-2 | mainlib | C4H4O2  | 84     |
| 3   | Borane, diethylmethyl-                      | 805        | 349         | 1115-07-7  | mainlib | C5H13B  | 84     |
| 4   | Borane, ethyldimethyl-                      | 775        | 97          | 1113-22-0  | mainlib | C4H11B  | 70     |
| 5   | 4,8-Dioxaspiro[2.5]oct-1-ene, 6,6-dimethyl- | 726        | 19          | 60935-22-0 | mainlib | C8H12O2 | 140    |

## Oxepine, 2,7-dimethyl-

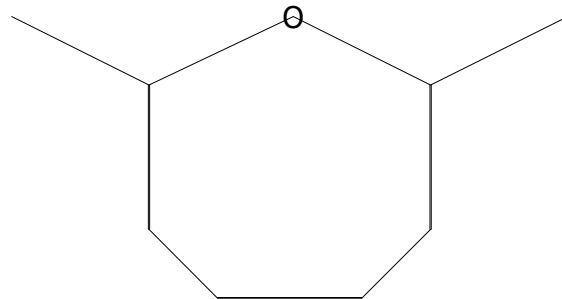

1st Dimension R.T. = 500.988

2nd Dimension R.T. = 1.287

Quant Mass(es) = 122

S/N = 323.78

Area = 36523

Height = 4423.9

Similarity = 799

Peak Apex - sample "AerMBR A 092319 (20191119):1", peak 43, at 500.988 , 1.287 sec , sec (Spec # 3375)

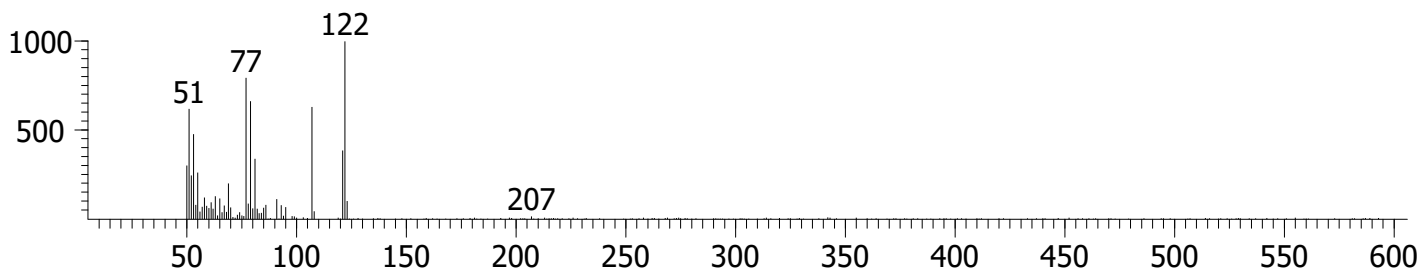

Peak True - sample "AerMBR A 092319 (20191119):1", peak 43, at 500.988 , 1.287 sec , sec (Spec # 3375)

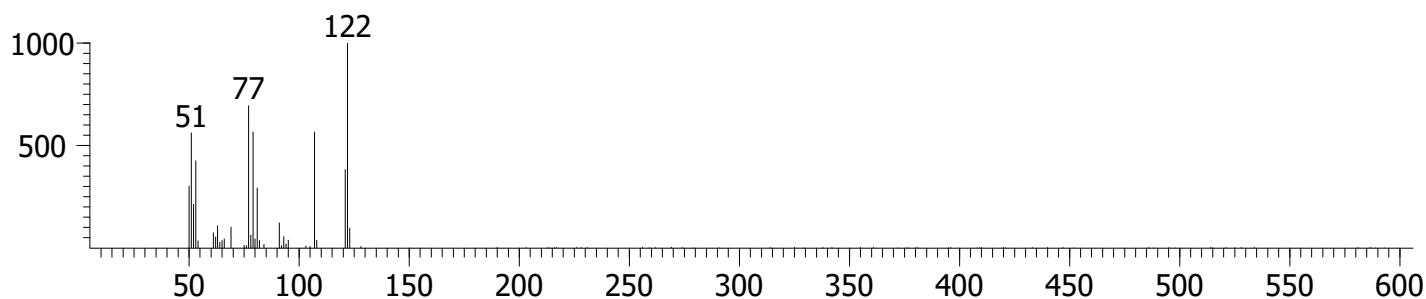

Library Hit - similarity 799, "Oxepine, 2,7-dimethyl-"

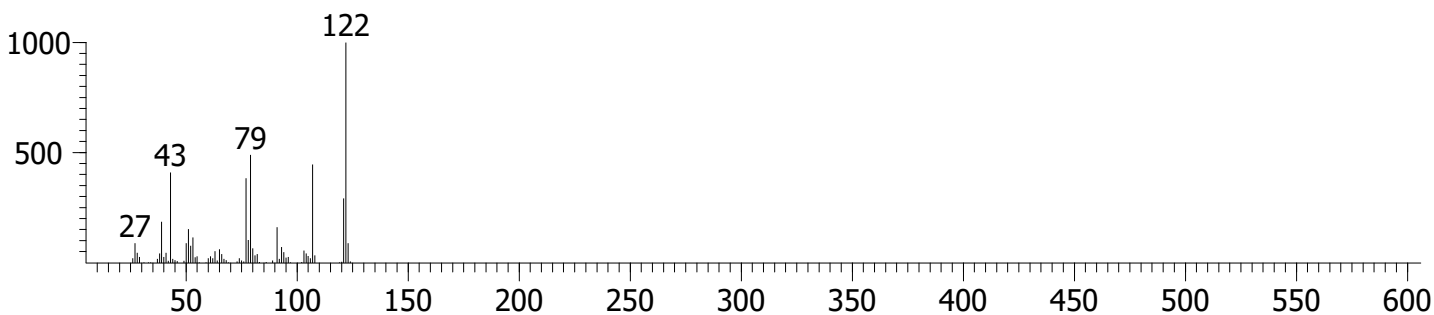

| Hit | Name                               | Similarity | Probability | CAS       | Library | Formula | Weight |
|-----|------------------------------------|------------|-------------|-----------|---------|---------|--------|
| 1   | Oxepine, 2,7-dimethyl-             | 799        | 3932        | 1487-99-6 | mainlib | C8H10O  | 122    |
| 2   | Phenol, 2,4-dimethyl-              | 771        | 1135        | 105-67-9  | mainlib | C8H10O  | 122    |
| 3   | Benzene, 1-methoxy-2-methyl-       | 752        | 551         | 578-58-5  | mainlib | C8H10O  | 122    |
| 4   | 1,3,5-Cycloheptatriene, 1-methoxy- | 751        | 530         | 1728-32-1 | mainlib | C8H10O  | 122    |
| 5   | Phenol, 2,5-dimethyl-              | 751        | 530         | 95-87-4   | mainlib | C8H10O  | 122    |

### 3-Penten-1-ol, 2,2,4-trimethyl-

1st Dimension R.T. = 518.478  
2nd Dimension R.T. = 1.076  
Quant Mass(es) = 97  
S/N = 833.06  
Area = 184433  
Height = 24032  
Similarity = 858

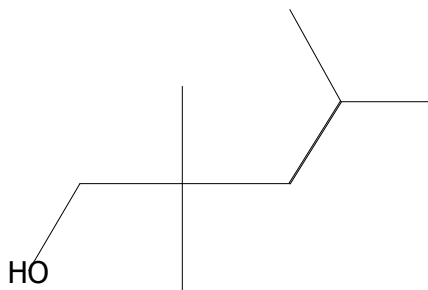

Peak Apex - sample "AerMBR A 092319 (20191119):1", peak 81, at 518.478 , 1.076 sec , sec (Spec # 5993)

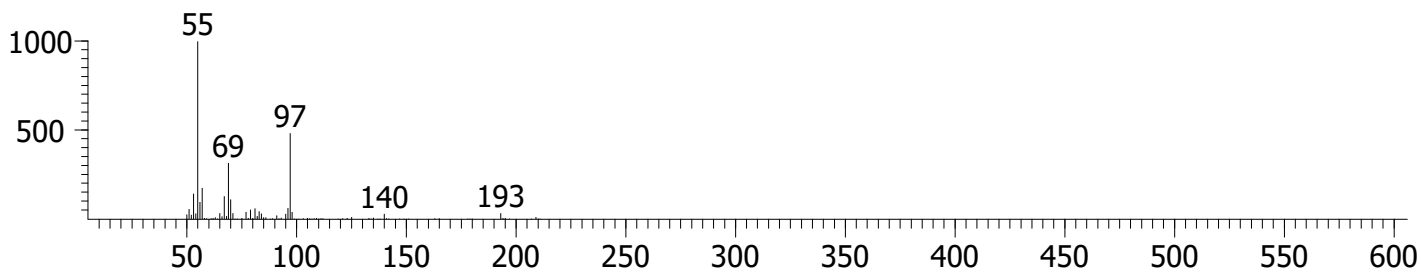

Peak True - sample "AerMBR A 092319 (20191119):1", peak 81, at 518.478 , 1.076 sec , sec (Spec # 5993)

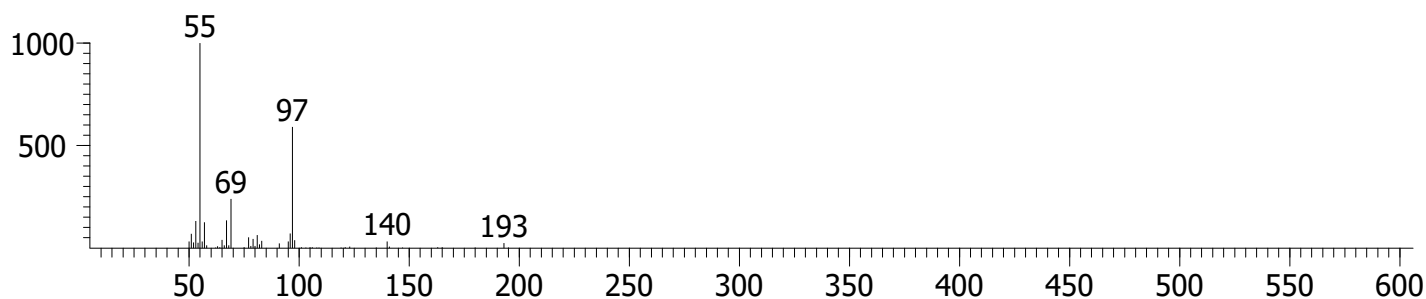

Library Hit - similarity 858, "3-Penten-1-ol, 2,2,4-trimethyl-"

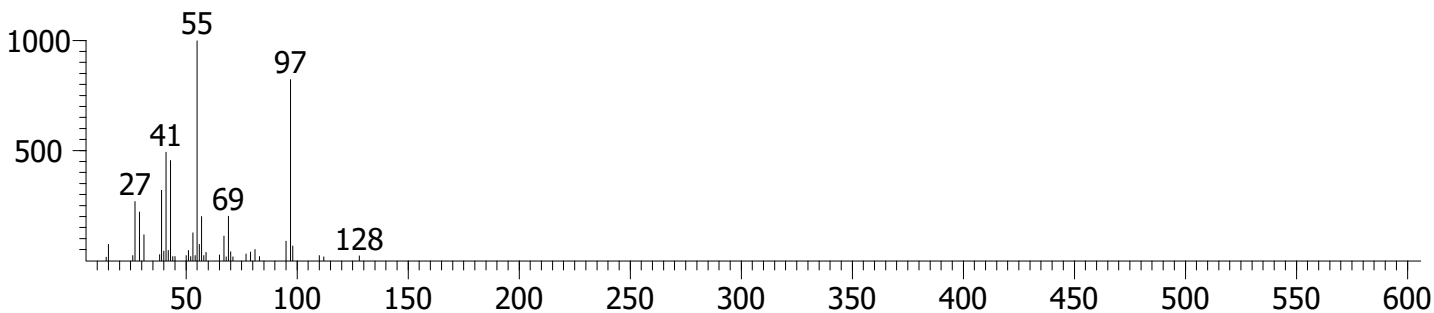

| Hit | Name                                        | Similarity | Probability | CAS        | Library | Formula | Weight |
|-----|---------------------------------------------|------------|-------------|------------|---------|---------|--------|
| 1   | 3-Penten-1-ol, 2,2,4-trimethyl-             | 858        | 4666        | 5842-53-5  | mainlib | C8H16O  | 128    |
| 2   | 3-Isopropyl-4-methyl-1-pentyn-3-ol          | 839        | 2265        | 5333-87-9  | mainlib | C9H16O  | 140    |
| 3   | 2-Pentene, 1-bromo-3,4-dimethyl-            | 806        | 593         | 922-99-6   | mainlib | C7H13Br | 176    |
| 4   | Cyclohexane, 1-ethyl-2-methyl-, cis-        | 790        | 341         | 4923-77-7  | mainlib | C9H18   | 126    |
| 5   | Cyclopropane, 3-chloro-1,1,2,2-tetramethyl- | 787        | 301         | 14123-41-2 | mainlib | C7H13Cl | 132    |

## Benzene, propyl-

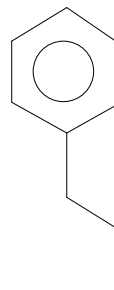

1st Dimension R.T. = 528.972

2nd Dimension R.T. = 1.307

Quant Mass(es) = 91

S/N = 2744.6

Area = 819438

Height = 104231

Similarity = 894

Peak Apex - sample "AerMBR A 092319 (20191119):1", peak 101, at 528.972 , 1.307 sec , sec (Spec # 7618)

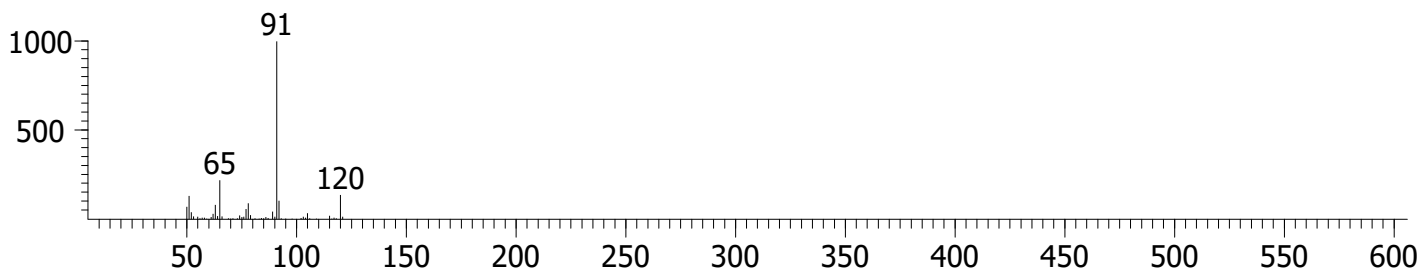

Peak True - sample "AerMBR A 092319 (20191119):1", peak 101, at 528.972 , 1.307 sec , sec (Spec # 7618)

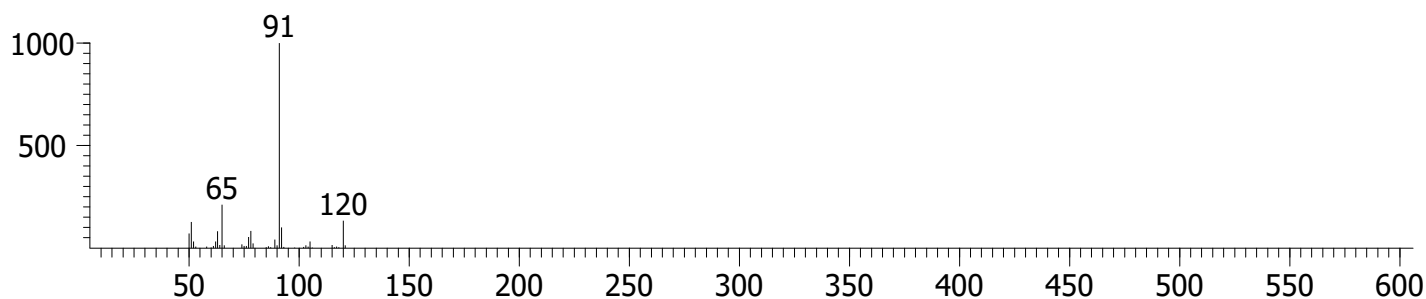

Library Hit - similarity 894, "Benzene, propyl-"

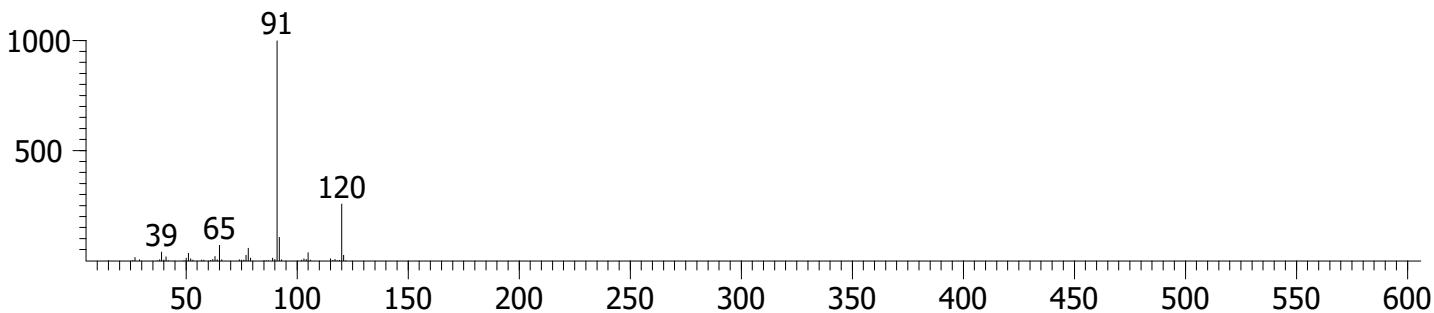

| Hit | Name                                              | Similarity | Probability | CAS        | Library | Formula   | Weight |
|-----|---------------------------------------------------|------------|-------------|------------|---------|-----------|--------|
| 1   | Benzene, propyl-                                  | 894        | 2357        | 103-65-1   | mainlib | C9H12     | 120    |
| 2   | Propanedinitrile, (1-methyl-3-phenylpropylidene)- | 866        | 680         | 69564-94-9 | mainlib | C13H12N2  | 196    |
| 3   | 1,3,5-Cycloheptatriene, 7-ethyl-                  | 866        | 680         | 17634-51-4 | mainlib | C9H12     | 120    |
| 4   | Acetamide, 2-(4-benzyloxyphenoxy]-N-(3-tolyl)-    | 862        | 575         | 0-00-0     | mainlib | C22H21NO3 | 347    |
| 5   | [4-(Benzyloxy)phenyl]methanamine                  | 859        | 508         | 22171-15-9 | mainlib | C14H15NO  | 213    |

### 3-Hexene-2,5-dione

1st Dimension R.T. = 528.972

2nd Dimension R.T. = 1.676

Quant Mass(es) = 97

S/N = 8442.1

Area = 2205759

Height = 292015

Similarity = 871

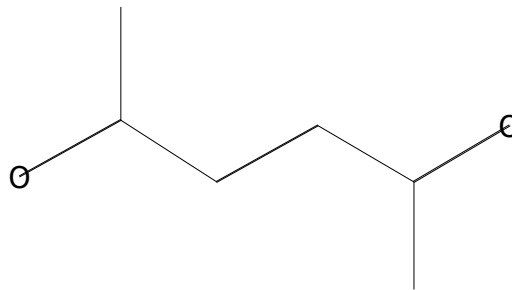

Peak Apex - sample "AerMBR A 092319 (20191119):1", peak 106, at 528.972 , 1.676 sec , sec (Spec # 7674)

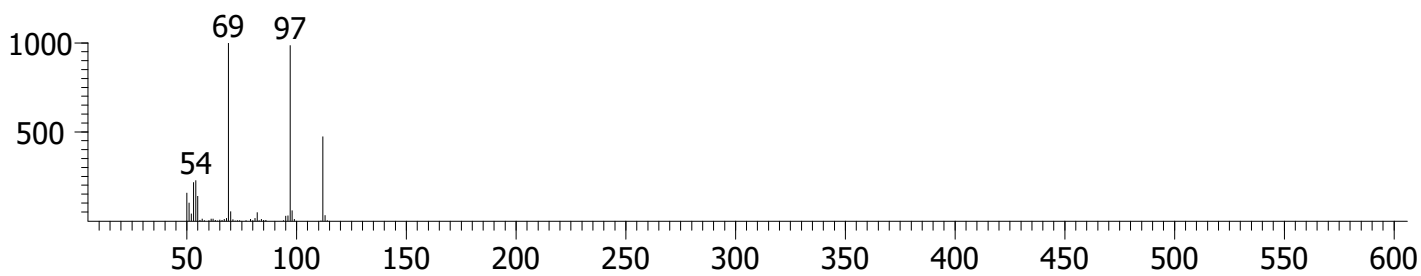

Peak True - sample "AerMBR A 092319 (20191119):1", peak 106, at 528.972 , 1.676 sec , sec (Spec # 7674)

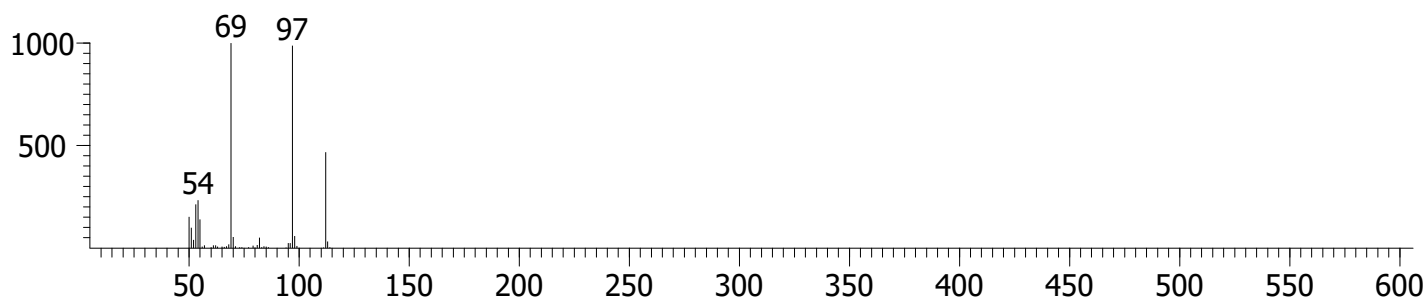

Library Hit - similarity 871, "3-Hexene-2,5-dione"

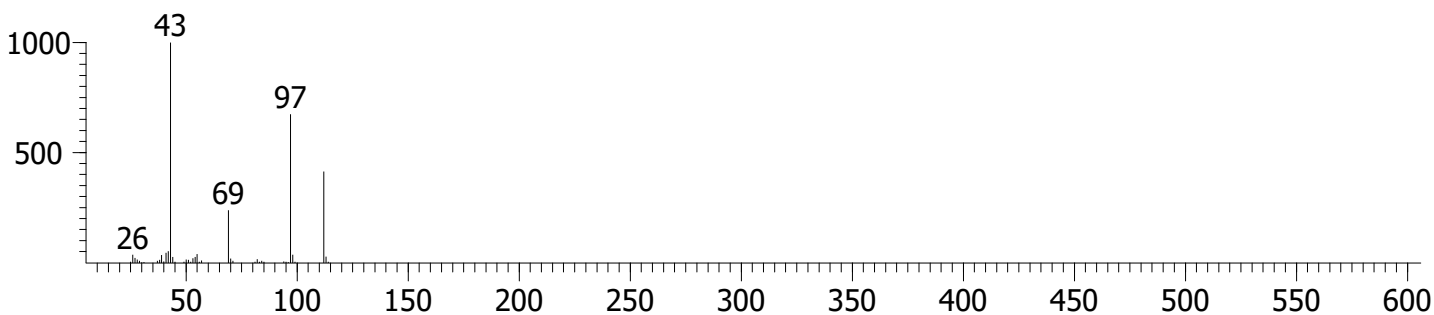

| Hit | Name                                              | Similarity | Probability | CAS        | Library | Formula   | Weight |
|-----|---------------------------------------------------|------------|-------------|------------|---------|-----------|--------|
| 1   | 3-Hexene-2,5-dione                                | 871        | 5650        | 4436-75-3  | mainlib | C6H8O2    | 112    |
| 2   | 2(5H)-Furanone, 5,5-dimethyl-                     | 850        | 2403        | 20019-64-1 | mainlib | C6H8O2    | 112    |
| 3   | 3-Hexen-2-one, 3-methyl-                          | 825        | 733         | 1187-80-0  | mainlib | C7H12O    | 112    |
| 4   | Cyclopentanecarboxylic acid, 2-fluorophenyl ester | 807        | 378         | 0-00-0     | mainlib | C12H13FO2 | 208    |
| 5   | Cyclopentanecarboxylic acid, 3-fluorophenyl ester | 807        | 378         | 0-00-0     | mainlib | C12H13FO2 | 208    |

## 1H-Benzotriazole

1st Dimension R.T. = 535.968  
2nd Dimension R.T. = 1.406  
Quant Mass(es) = 119  
S/N = 3061.5  
Area = 386216  
Height = 62101  
Similarity = 922

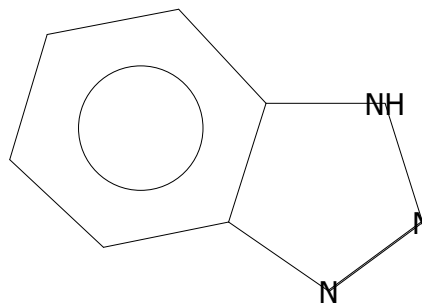

Peak Apex - sample "AerMBR A 092319 (20191119):1", peak 117, at 535.968 , 1.406 sec , sec (Spec # 8693)

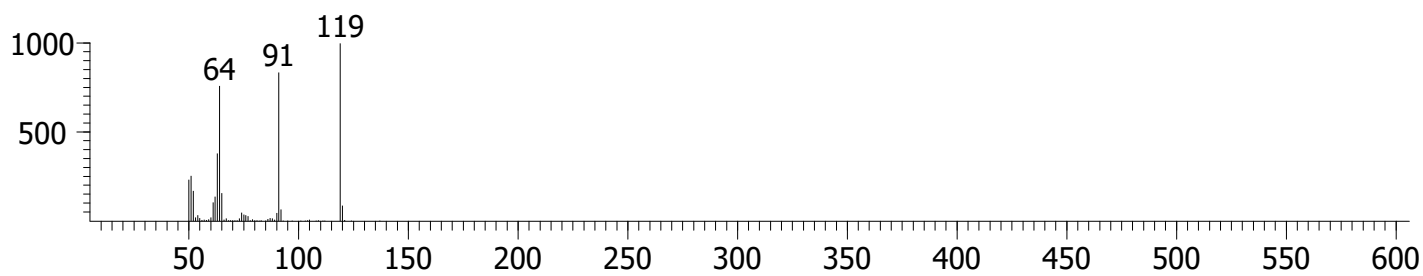

Peak True - sample "AerMBR A 092319 (20191119):1", peak 117, at 535.968 , 1.406 sec , sec (Spec # 8693)

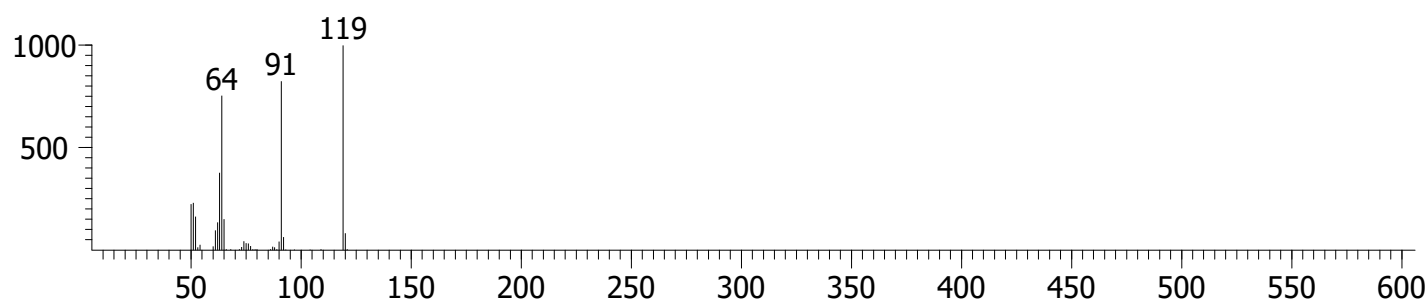

Library Hit - similarity 922, "1H-Benzotriazole"

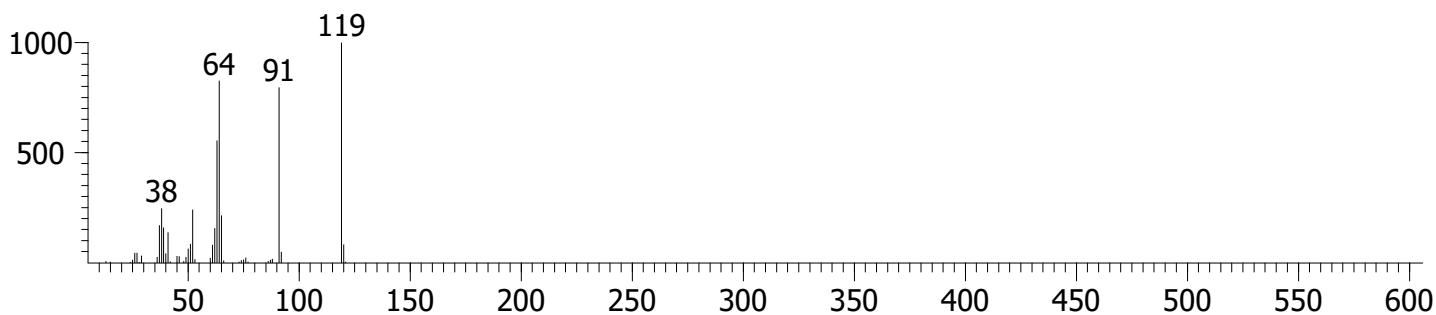

| Hit | Name                              | Similarity | Probability | CAS        | Library | Formula    | Weight |
|-----|-----------------------------------|------------|-------------|------------|---------|------------|--------|
| 1   | Proximpam                         | 964        | 4827        | 2828-42-4  | mainlib | C10H12N2O2 | 192    |
| 2   | Carbamoyl chloride, phenyl-       | 947        | 2634        | 2040-76-8  | mainlib | C7H6ClNO   | 155    |
| 3   | 1H-Benzotriazole                  | 922        | 803         | 95-14-7    | mainlib | C6H5N3     | 119    |
| 4   | 1H-Benzotriazole-1-carboxaldehyde | 899        | 293         | 72773-04-7 | mainlib | C7H5N3O    | 147    |
| 5   | Benzene, isocyanato-              | 898        | 282         | 103-71-9   | mainlib | C7H5NO     | 119    |

## 3-Ethylcyclopentanone

1st Dimension R.T. = 535.968

2nd Dimension R.T. = 1.459

Quant Mass(es) = 83

S/N = 251.70

Area = 76991

Height = 9008.9

Similarity = 892

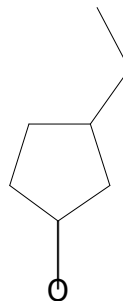

Peak Apex - sample "AerMBR A 092319 (20191119):1", peak 118, at 535.968 , 1.459 sec , sec (Spec # 8701)

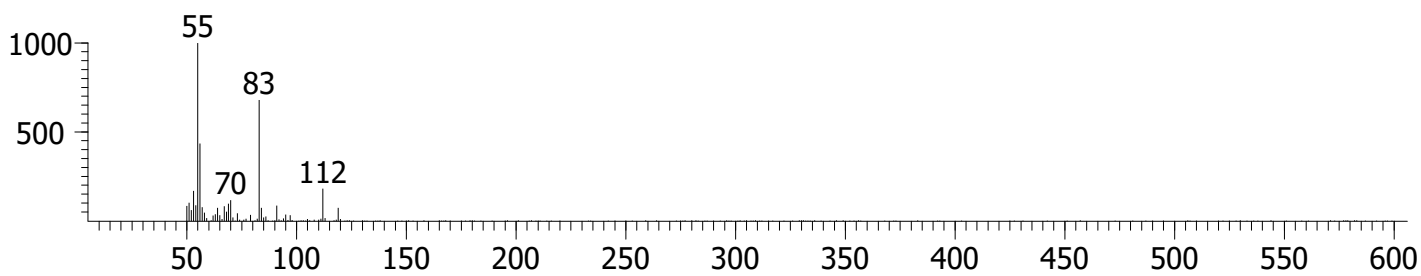

Peak True - sample "AerMBR A 092319 (20191119):1", peak 118, at 535.968 , 1.459 sec , sec (Spec # 8701)

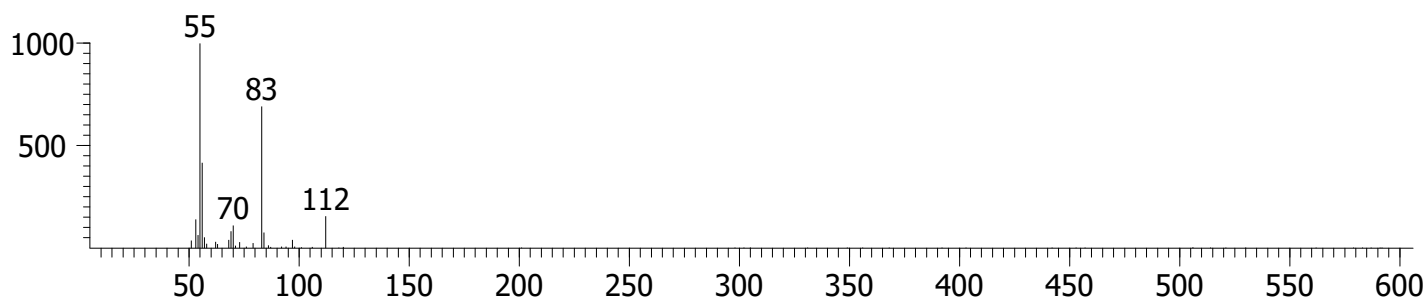

Library Hit - similarity 892, "3-Ethylcyclopentanone"

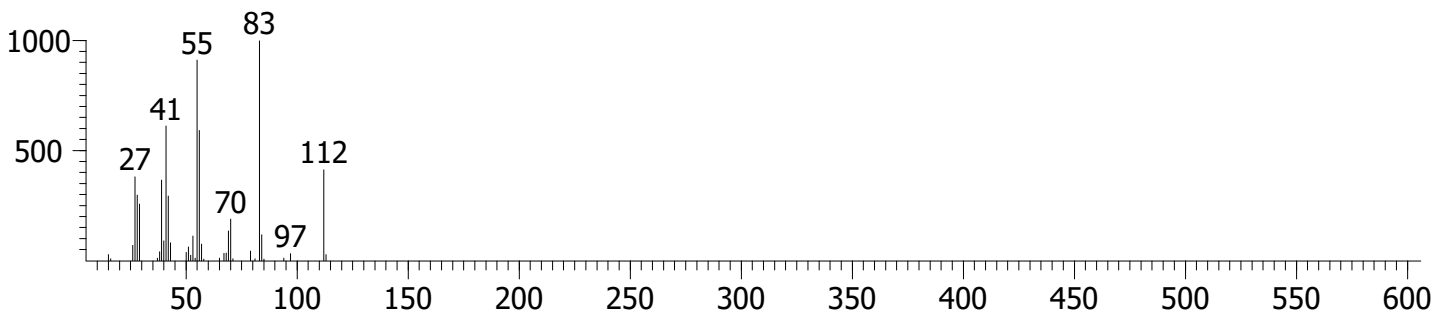

| Hit | Name                    | Similarity | Probability | CAS        | Library | Formula | Weight |
|-----|-------------------------|------------|-------------|------------|---------|---------|--------|
| 1   | 3-Ethylcyclopentanone   | 892        | 4729        | 10264-55-8 | mainlib | C7H12O  | 112    |
| 2   | 3-Heptene, 5-methyl-    | 846        | 998         | 13172-91-3 | mainlib | C8H16   | 112    |
| 3   | 2-Hexene, 2,3-dimethyl- | 838        | 744         | 7145-20-2  | mainlib | C8H16   | 112    |
| 4   | 3-Ethyl-3-hexene        | 818        | 339         | 16789-51-8 | mainlib | C8H16   | 112    |
| 5   | 4-Ethyl-2-hexene        | 810        | 253         | 19780-46-2 | mainlib | C8H16   | 112    |

# Benzene, 1-ethyl-4-methyl-

1st Dimension R.T. = 539.466  
2nd Dimension R.T. = 1.327  
Quant Mass(es) = 105  
S/N = 13801  
Area = 3567742  
Height = 483997  
Similarity = 917

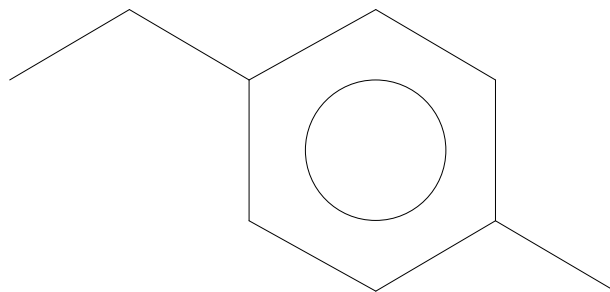

Peak Apex - sample "AerMBR A 092319 (20191119):1", peak 121, at 539.466 , 1.327 sec , sec (Spec # 9211)

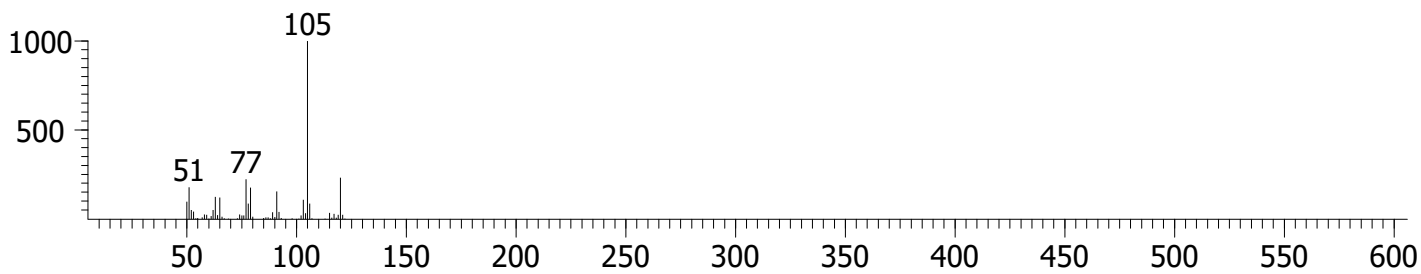

Peak True - sample "AerMBR A 092319 (20191119):1", peak 121, at 539.466 , 1.327 sec , sec (Spec # 9211)

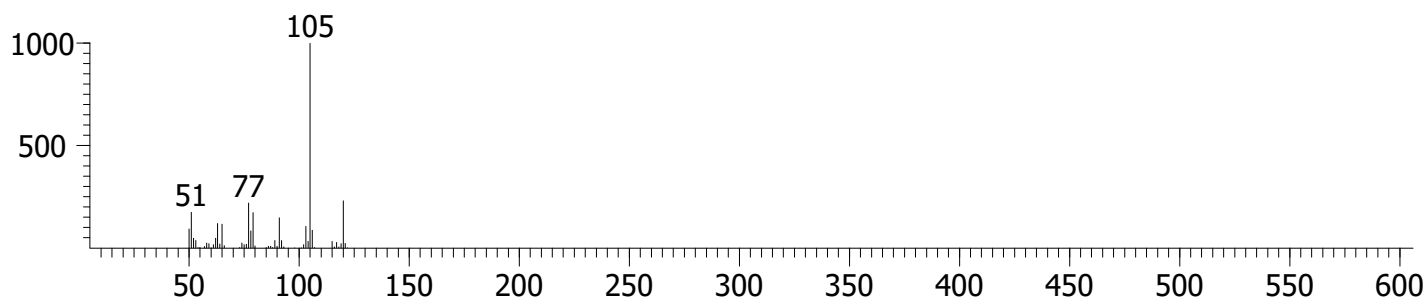

Library Hit - similarity 917, "Benzene, 1-ethyl-4-methyl-"

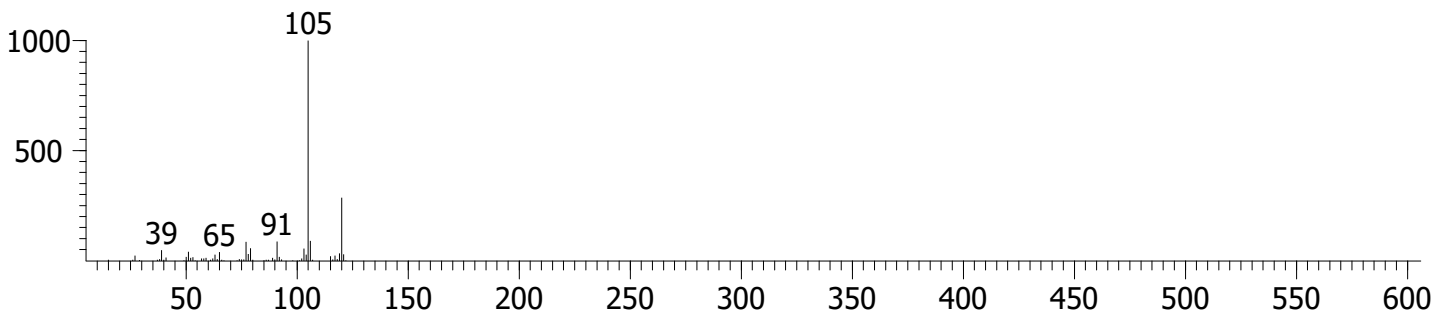

| Hit | Name                       | Similarity | Probability | CAS      | Library | Formula | Weight |
|-----|----------------------------|------------|-------------|----------|---------|---------|--------|
| 1   | Benzene, 1-ethyl-4-methyl- | 917        | 2035        | 622-96-8 | mainlib | C9H12   | 120    |
| 2   | Benzene, 1-ethyl-3-methyl- | 915        | 1877        | 620-14-4 | mainlib | C9H12   | 120    |
| 3   | Benzene, 1-ethyl-2-methyl- | 912        | 1658        | 611-14-3 | mainlib | C9H12   | 120    |
| 4   | Benzene, (1-methylethyl)-  | 902        | 1171        | 98-82-8  | mainlib | C9H12   | 120    |
| 5   | Benzene, 1,2,3-trimethyl-  | 894        | 873         | 526-73-8 | mainlib | C9H12   | 120    |



## Benzaldehyde

1st Dimension R.T. = 542.964  
2nd Dimension R.T. = 1.637  
Quant Mass(es) = 106  
S/N = 6998.9  
Area = 785867  
Height = 112419  
Similarity = 889

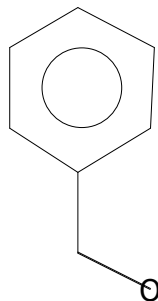

Peak Apex - sample "AerMBR A 092319 (20191119):1", peak 124, at 542.964 , 1.637 sec , sec (Spec # 9788)

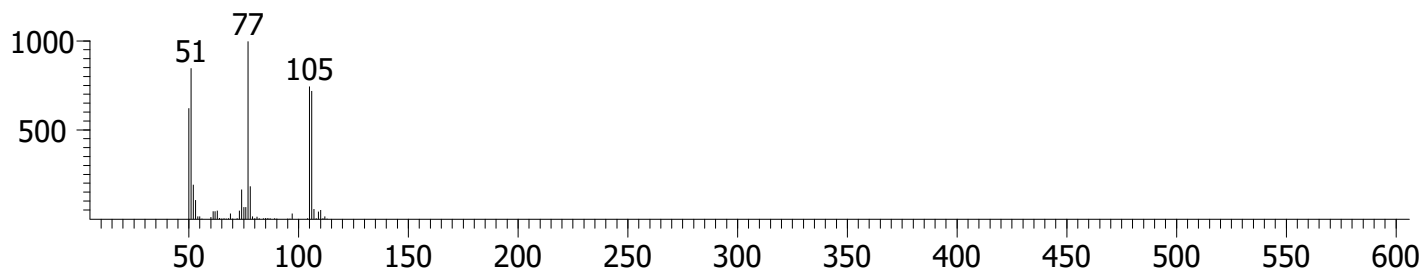

Peak True - sample "AerMBR A 092319 (20191119):1", peak 124, at 542.964 , 1.637 sec , sec (Spec # 9788)

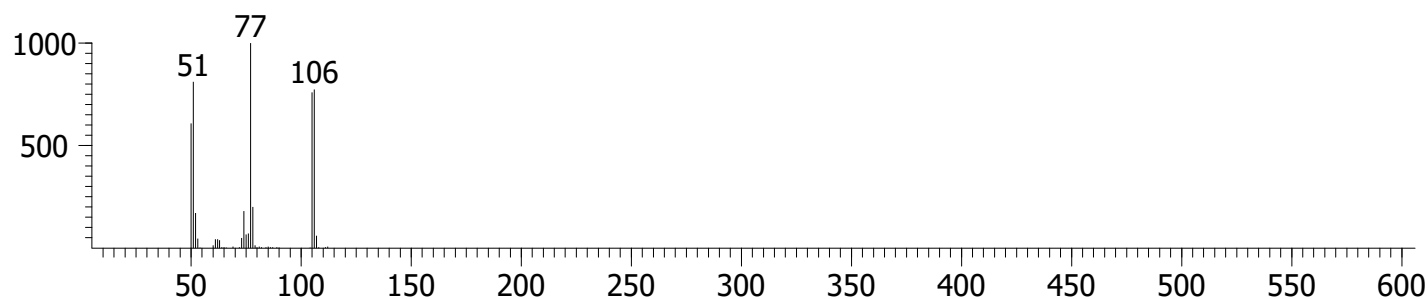

Library Hit - similarity 889, "Benzaldehyde"

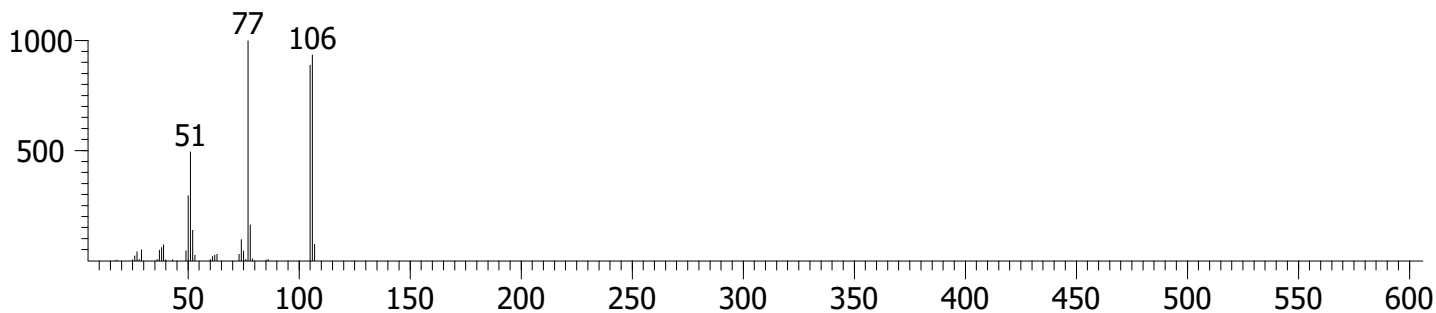

| Hit | Name                                         | Similarity | Probability | CAS        | Library | Formula      | Weight |
|-----|----------------------------------------------|------------|-------------|------------|---------|--------------|--------|
| 1   | Benzaldehyde                                 | 889        | 5374        | 100-52-7   | mainlib | C7H6O        | 106    |
| 2   | 1,2,4-Trioxolane, 3,5-diphenyl-              | 844        | 1144        | 23888-15-5 | mainlib | C14H12O3     | 228    |
| 3   | Bis[4-acetamidophenylsulfonyl]phenyl methane | 840        | 967         | 81269-03-6 | mainlib | C23H22N2O6S2 | 486    |
| 4   | 1,2,4-Trioxolane, 3-phenyl-                  | 824        | 556         | 23253-30-7 | mainlib | C8H8O3       | 152    |
| 5   | Ethanone, 2-amino-1-phenyl-                  | 820        | 470         | 613-89-8   | mainlib | C8H9NO       | 135    |

## Dimethyl trisulfide

1st Dimension R.T. = 556.956

2nd Dimension R.T. = 1.624

Quant Mass(es) = 126

S/N = 609.80

Area = 74036

Height = 10209

Similarity = 930

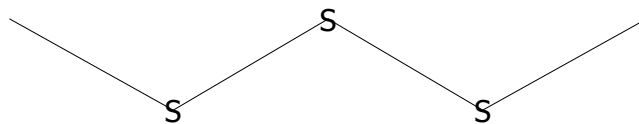

Peak Apex - sample "AerMBR A 092319 (20191119):1", peak 148, at 556.956 , 1.624 sec , sec (Spec # 11906 )

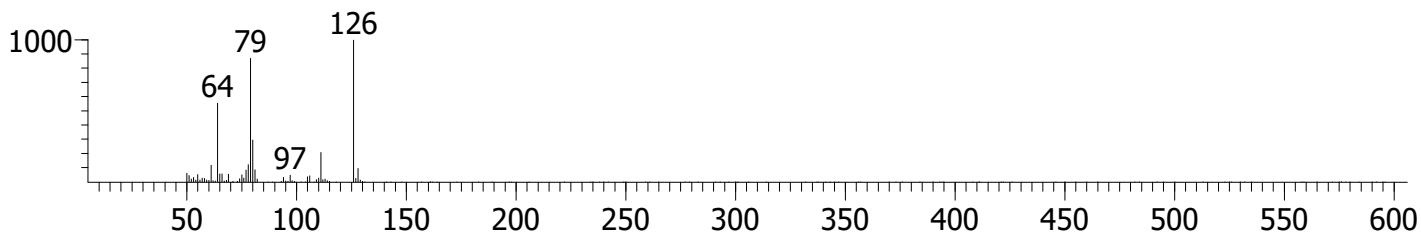

Peak True - sample "AerMBR A 092319 (20191119):1", peak 148, at 556.956 , 1.624 sec , sec (Spec # 11906)

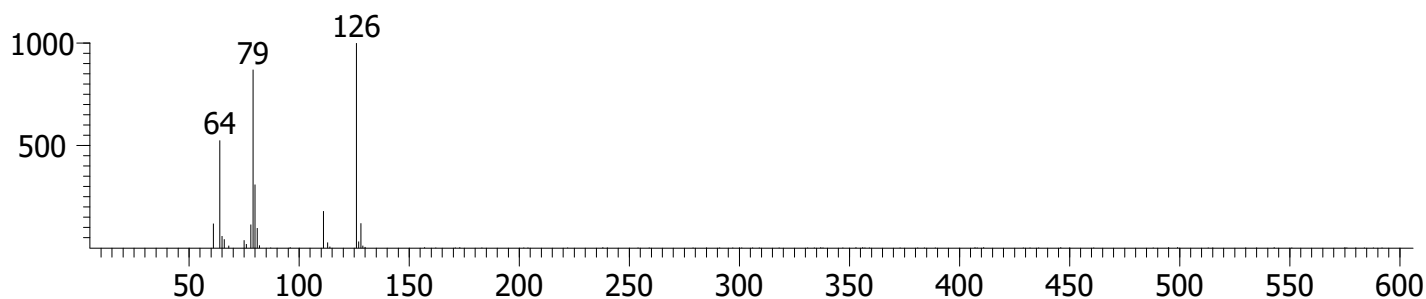

Library Hit - similarity 930, "Dimethyl trisulfide"

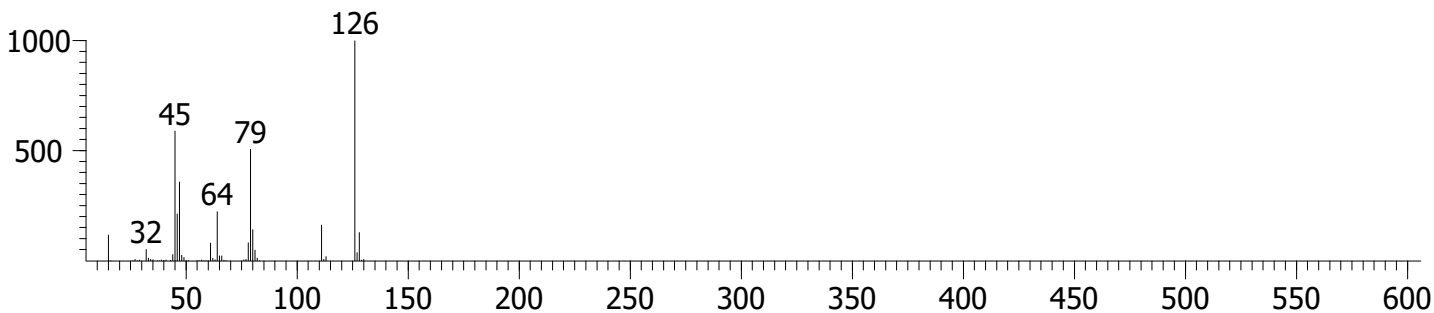

| Hit | Name                                | Similarity | Probability | CAS         | Library | Formula  | Weight |
|-----|-------------------------------------|------------|-------------|-------------|---------|----------|--------|
| 1   | Dimethyl trisulfide                 | 930        | 9775        | 3658-80-8   | mainlib | C2H6S3   | 126    |
| 2   | Bis-(methylthio)-phosphine          | 669        | 97          | 105414-86-6 | mainlib | C2H7PS2  | 126    |
| 3   | Thiophosphordiamide, S-methyl ester | 661        | 72          | 0-00-0      | mainlib | CH7N2OPS | 126    |
| 4   | S-Methyl methanethiosulphonate      | 606        | 14          | 2949-92-0   | mainlib | C2H6O2S2 | 126    |
| 5   | Pentasulfide, dimethyl              | 604        | 13          | 7330-31-6   | mainlib | C2H6S5   | 190    |

# Phenol

1st Dimension R.T. = 560.454  
2nd Dimension R.T. = 1.584  
Quant Mass(es) = 94  
S/N = 25771  
Area = 5949848  
Height = 870160  
Similarity = 957

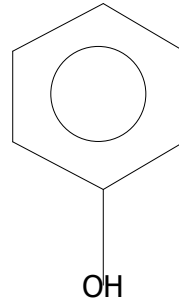

Peak Apex - sample "AerMBR A 092319 (20191119):1", peak 158, at 560.454 , 1.584 sec , sec (Spec # 12430 )

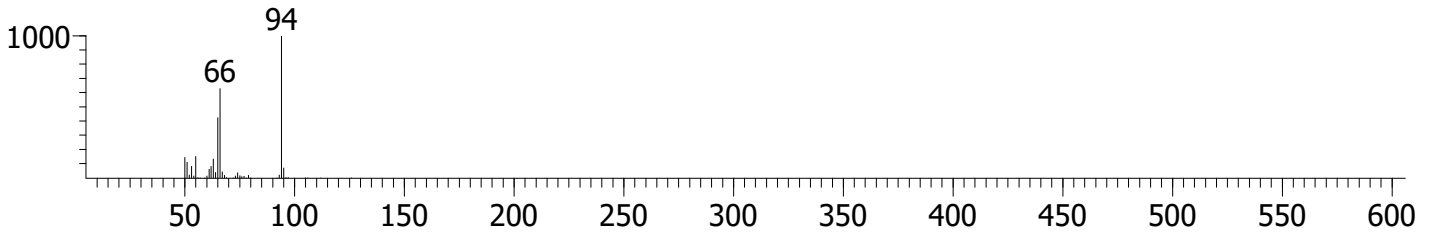

Peak True - sample "AerMBR A 092319 (20191119):1", peak 158, at 560.454 , 1.584 sec , sec (Spec # 12430)

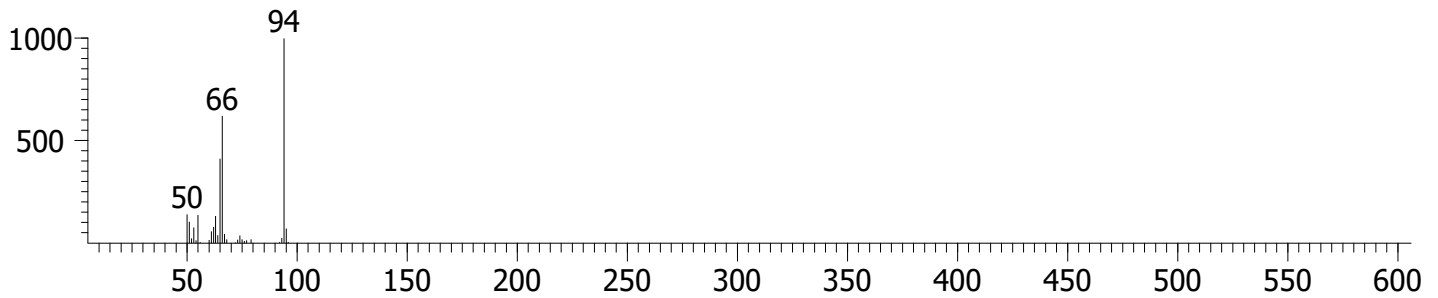

Library Hit - similarity 957, "Phenol"

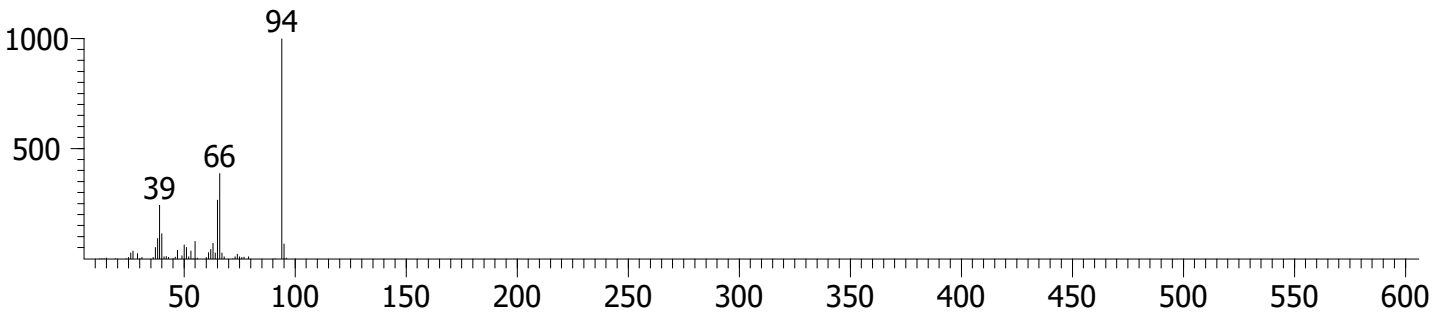

| Hit | Name                                | Similarity | Probability | CAS        | Library | Formula | Weight |
|-----|-------------------------------------|------------|-------------|------------|---------|---------|--------|
| 1   | Phenol                              | 957        | 4468        | 108-95-2   | mainlib | C6H6O   | 94     |
| 2   | Phosphonic acid, (p-hydroxyphenyl)- | 946        | 3065        | 33795-18-5 | mainlib | C6H7O4P | 174    |
| 3   | Carbamic acid, phenyl ester         | 933        | 1980        | 622-46-8   | mainlib | C7H7NO2 | 137    |
| 4   | 2-Vinylfuran                        | 848        | 178         | 1487-18-9  | mainlib | C6H6O   | 94     |
| 5   | Formic acid phenyl ester            | 846        | 164         | 1864-94-4  | mainlib | C7H6O2  | 122    |

# Aniline

1st Dimension R.T. = 563.952  
2nd Dimension R.T. = 1.775  
Quant Mass(es) = 93  
S/N = 1138.5  
Area = 217340  
Height = 27616  
Similarity = 948

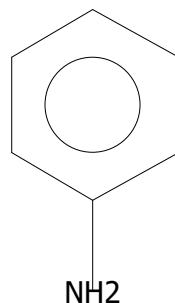

Peak Apex - sample "AerMBR A 092319 (20191119):1", peak 168, at 563.952 , 1.775 sec , sec (Spec # 12989 )

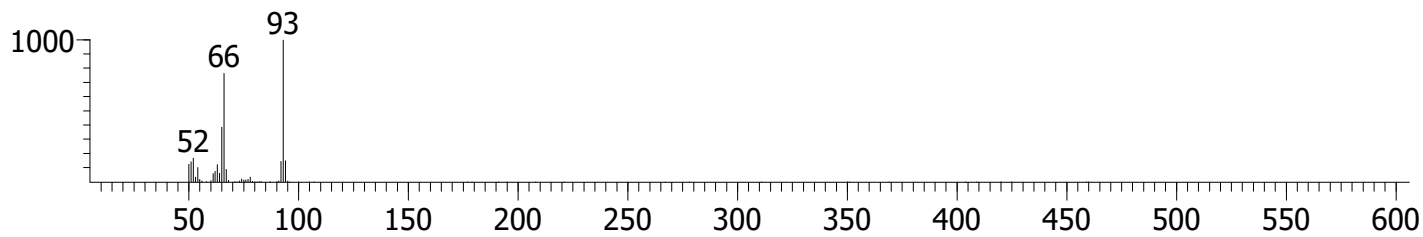

Peak True - sample "AerMBR A 092319 (20191119):1", peak 168, at 563.952 , 1.775 sec , sec (Spec # 12989)

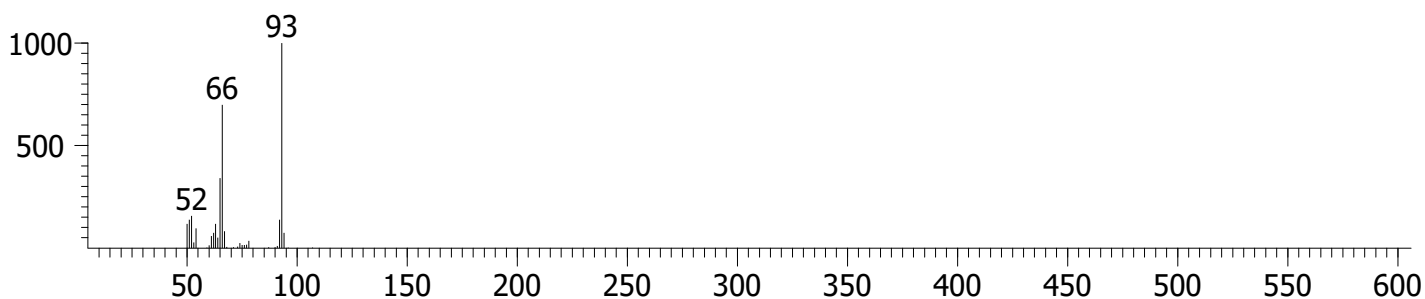

Library Hit - similarity 948, "Aniline"

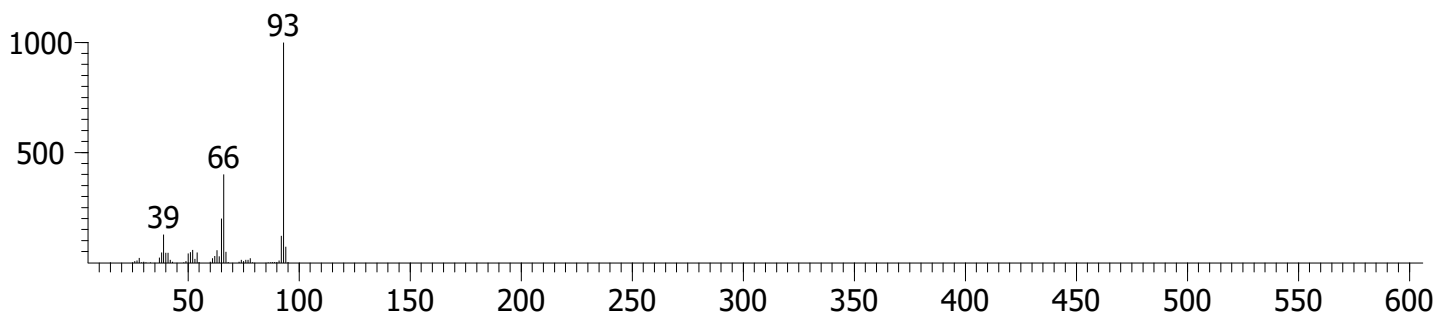

| Hit | Name                                       | Similarity | Probability | CAS        | Library | Formula    | Weight |
|-----|--------------------------------------------|------------|-------------|------------|---------|------------|--------|
| 1   | Aniline                                    | 948        | 5596        | 62-53-3    | mainlib | C6H7N      | 93     |
| 2   | Silanediamine, 1,1-dimethyl-N,N'-diphenyl- | 931        | 3054        | 13435-09-1 | mainlib | C14H18N2Si | 242    |
| 3   | Pyridine, 3-methyl-                        | 884        | 638         | 108-99-6   | mainlib | C6H7N      | 93     |
| 4   | Pyridine, 4-methyl-                        | 860        | 214         | 108-89-4   | mainlib | C6H7N      | 93     |
| 5   | 2-Pyridineacetic acid                      | 856        | 180         | 13115-43-0 | mainlib | C7H7NO2    | 137    |

## Benzonitrile

1st Dimension R.T. = 574.446  
2nd Dimension R.T. = 1.723  
Quant Mass(es) = 103  
S/N = 743.24  
Area = 107603  
Height = 14837  
Similarity = 951

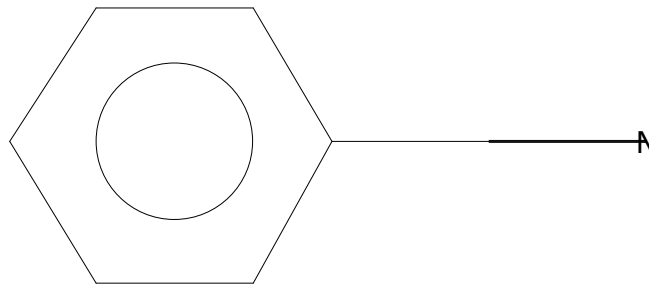

Peak Apex - sample "AerMBR A 092319 (20191119):1", peak 197, at 574.446 , 1.723 sec , sec (Spec # 14571 )

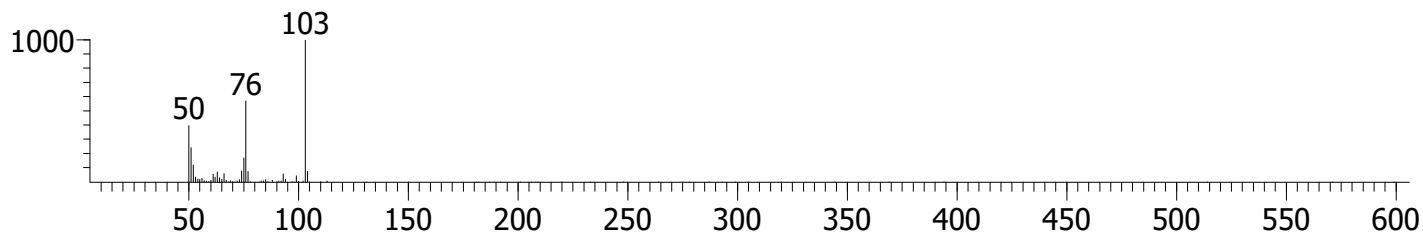

Peak True - sample "AerMBR A 092319 (20191119):1", peak 197, at 574.446 , 1.723 sec , sec (Spec # 14571)

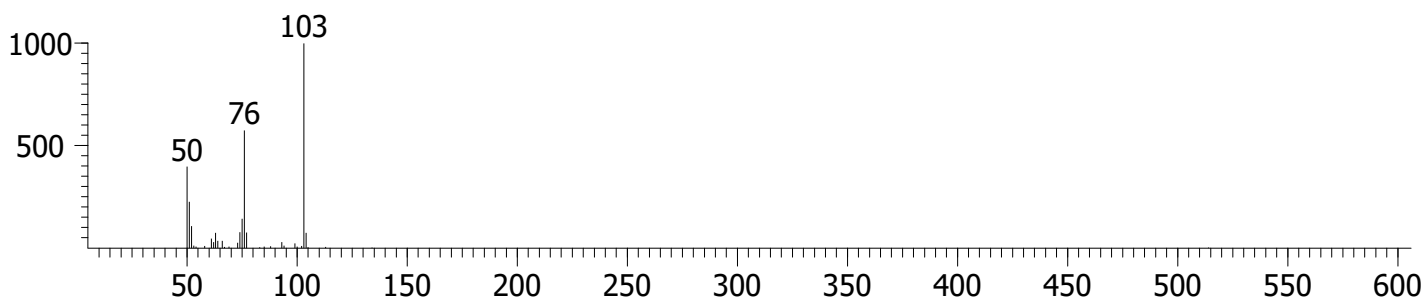

Library Hit - similarity 951, "Benzonitrile"

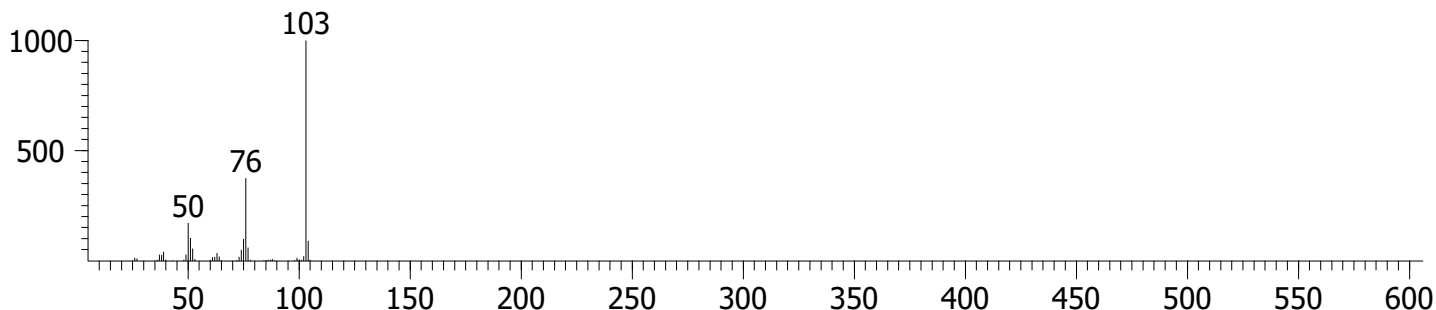

| Hit | Name                                                | Similarity | Probability | CAS         | Library | Formula  | Weight |
|-----|-----------------------------------------------------|------------|-------------|-------------|---------|----------|--------|
| 1   | Benzonitrile                                        | 951        | 5002        | 100-47-0    | mainlib | C7H5N    | 103    |
| 2   | 2-Ethynyl pyridine                                  | 942        | 3631        | 1945-84-2   | mainlib | C7H5N    | 103    |
| 3   | Tricyclo[3.1.0.0(2,4)]hex-3-ene-3-carbonitrile      | 901        | 828         | 103495-51-8 | mainlib | C7H5N    | 103    |
| 4   | Bicyclo[2.2.2]octa-2,5-diene-2-carbonitrile         | 876        | 252         | 39863-23-5  | mainlib | C9H9N    | 131    |
| 5   | 6H-1,2,5-Oxadiazine-6-thione, 4,5-dihydro-3-phenyl- | 862        | 158         | 33406-07-4  | mainlib | C9H8N2OS | 192    |

# Pyridine, 2,3,5-trimethyl-

1st Dimension R.T. = 577.944

2nd Dimension R.T. = 1.459

Quant Mass(es) = 121

S/N = 372.38

Area = 45204

Height = 5686.5

Similarity = 922

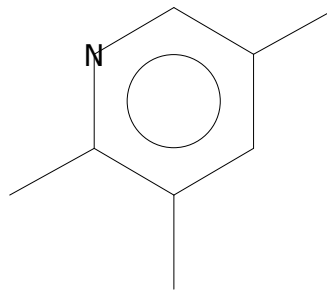

Peak Apex - sample "AerMBR A 092319 (20191119):1", peak 201, at 577.944 , 1.459 sec , sec (Spec # 15061 )

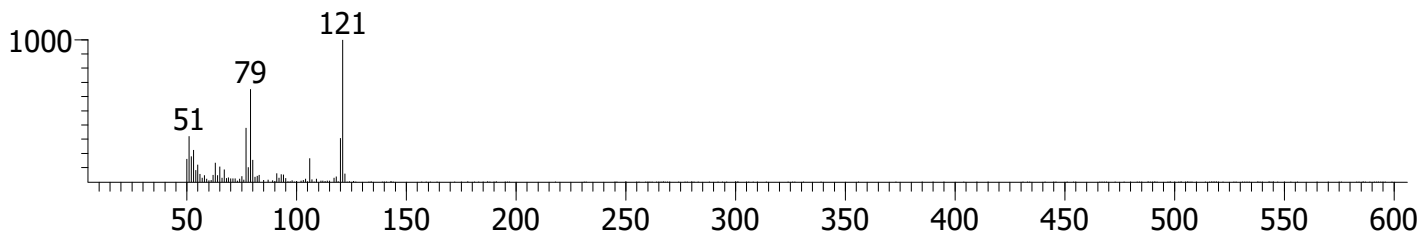

Peak True - sample "AerMBR A 092319 (20191119):1", peak 201, at 577.944 , 1.459 sec , sec (Spec # 15061)

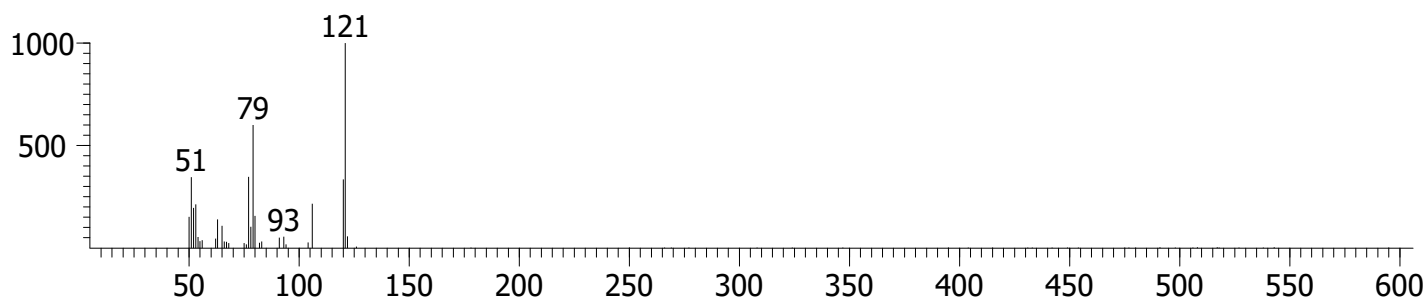

Library Hit - similarity 922, "Pyridine, 2,3,5-trimethyl-"

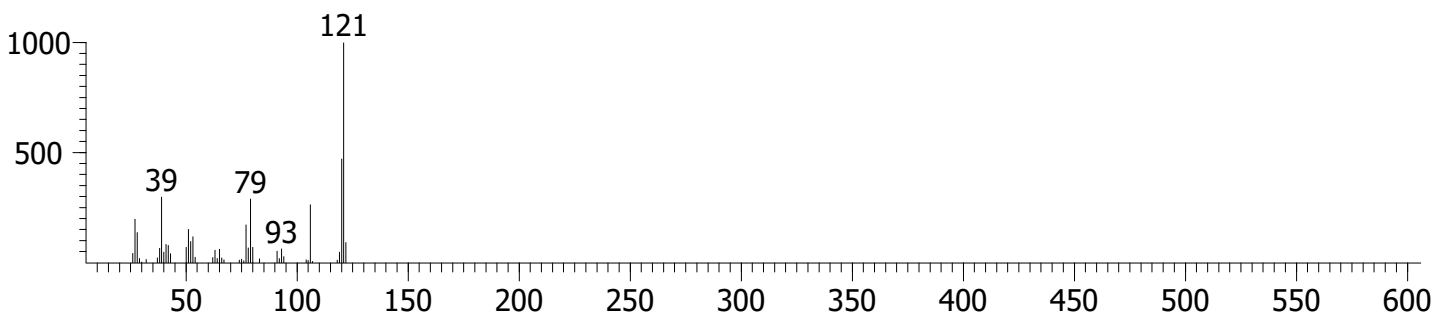

| Hit | Name                                                         | Similarity | Probability | CAS         | Library | Formula     | Weight |
|-----|--------------------------------------------------------------|------------|-------------|-------------|---------|-------------|--------|
| 1   | Pyridine, 2,3,5-trimethyl-                                   | 922        | 5787        | 695-98-7    | mainlib | C8H11N      | 121    |
| 2   | Pyridine, 2,3,6-trimethyl-                                   | 899        | 2113        | 1462-84-6   | mainlib | C8H11N      | 121    |
| 3   | Pyridine, 2,4,6-trimethyl-                                   | 888        | 1450        | 108-75-8    | mainlib | C8H11N      | 121    |
| 4   | N-Fluoro-2,4,6-trimethylpyridinium trifluoromethanesulfonate | 803        | 130         | 107264-00-6 | mainlib | C9H11F4NO3S | 289    |
| 5   | Pyridine, 3-ethyl-5-methyl-                                  | 795        | 97          | 3999-78-8   | mainlib | C8H11N      | 121    |

# Benzene, 1,2,3-trimethyl-

1st Dimension R.T. = 581.442  
2nd Dimension R.T. = 1.373  
Quant Mass(es) = 105  
S/N = 12672  
Area = 2460637  
Height = 355064  
Similarity = 961

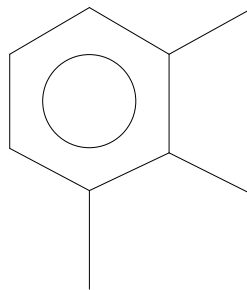

Peak Apex - sample "AerMBR A 092319 (20191119):1", peak 205, at 581.442 , 1.373 sec , sec (Spec # 15578 )

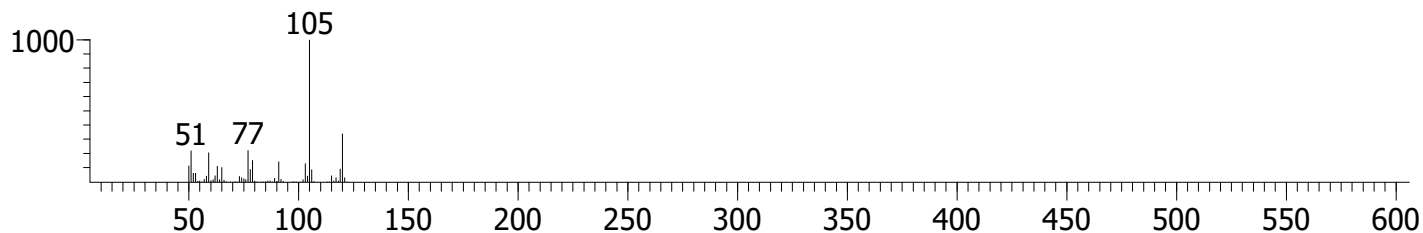

Peak True - sample "AerMBR A 092319 (20191119):1", peak 205, at 581.442 , 1.373 sec , sec (Spec # 15578)

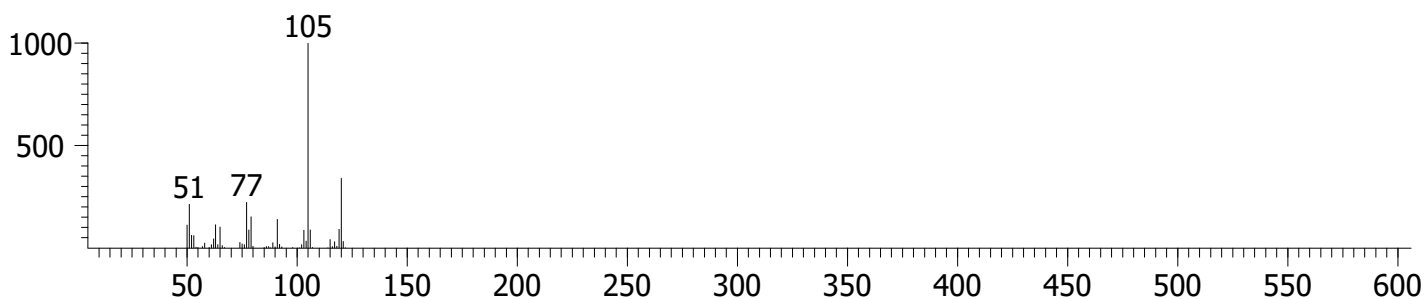

Library Hit - similarity 961, "Benzene, 1,2,3-trimethyl-"

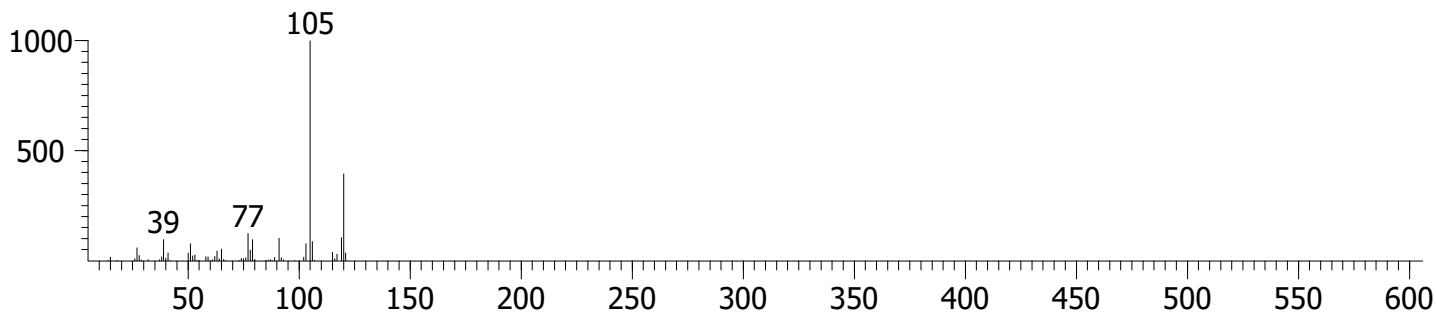

| Hit | Name                       | Similarity | Probability | CAS        | Library | Formula | Weight |
|-----|----------------------------|------------|-------------|------------|---------|---------|--------|
| 1   | Benzene, 1,2,3-trimethyl-  | 961        | 5796        | 526-73-8   | mainlib | C9H12   | 120    |
| 2   | Benzene, 1,2,4-trimethyl-  | 936        | 1768        | 95-63-6    | mainlib | C9H12   | 120    |
| 3   | 2,4-Nonadiyne              | 912        | 592         | 63621-15-8 | mainlib | C9H12   | 120    |
| 4   | Benzene, 1-ethyl-3-methyl- | 900        | 394         | 620-14-4   | mainlib | C9H12   | 120    |
| 5   | Benzene, 1-ethyl-4-methyl- | 899        | 379         | 622-96-8   | mainlib | C9H12   | 120    |

# Benzene, 1,3-dichloro-

1st Dimension R.T. = 609.426  
2nd Dimension R.T. = 1.518  
Quant Mass(es) = 146  
S/N = 762.55  
Area = 87252  
Height = 13961  
Similarity = 734

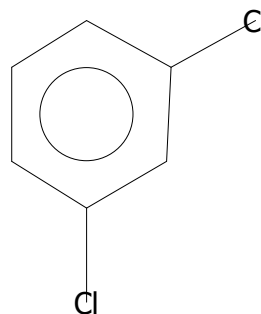

Peak Apex - sample "AerMBR A 092319 (20191119):1", peak 263, at 609.426 , 1.518 sec , sec (Spec # 19840 )

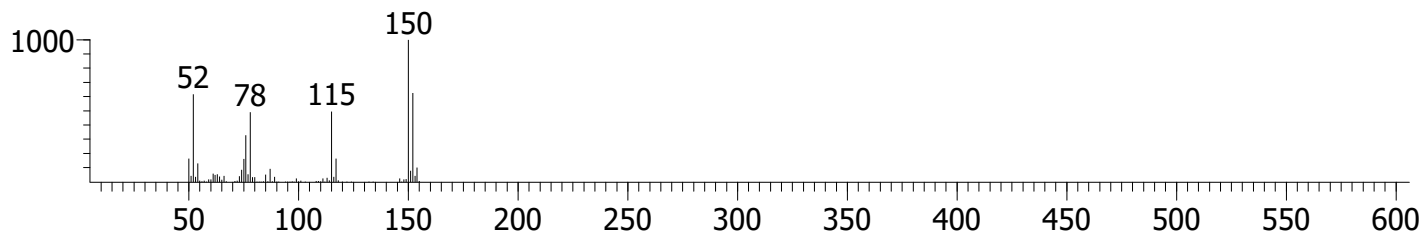

Peak True - sample "AerMBR A 092319 (20191119):1", peak 263, at 609.426 , 1.518 sec , sec (Spec # 19840)

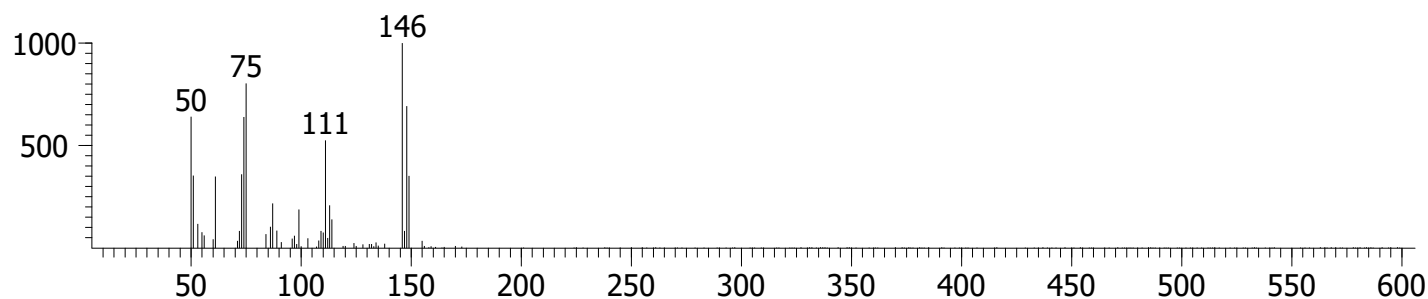

Library Hit - similarity 734, "Benzene, 1,3-dichloro-"

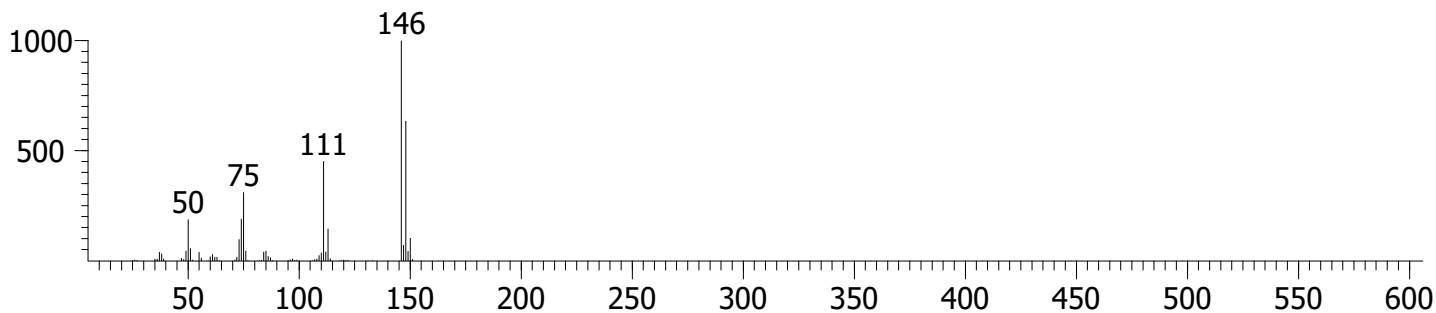

| Hit | Name                                     | Similarity | Probability | CAS       | Library | Formula    | Weight |
|-----|------------------------------------------|------------|-------------|-----------|---------|------------|--------|
| 1   | Benzene, 1,3-dichloro-                   | 734        | 6867        | 541-73-1  | mainlib | C6H4Cl2    | 146    |
| 2   | Benzene, 1,4-dichloro-                   | 709        | 2094        | 106-46-7  | mainlib | C6H4Cl2    | 146    |
| 3   | Benzene, 1,2-dichloro-                   | 688        | 891         | 95-50-1   | mainlib | C6H4Cl2    | 146    |
| 4   | 2,5-Dichloro-2,4,6-cycloheptatrien-1-one | 592        | 71          | 7157-27-9 | mainlib | C7H4Cl2O   | 174    |
| 5   | 2-Chloro-6-fluorophenol, pentyl ether    | 542        | 14          | 0-00-0    | mainlib | C11H14ClFO | 216    |



# o-Cymene

1st Dimension R.T. = 623.418  
2nd Dimension R.T. = 1.353  
Quant Mass(es) = 119  
S/N = 875.78  
Area = 97954  
Height = 13547  
Similarity = 963

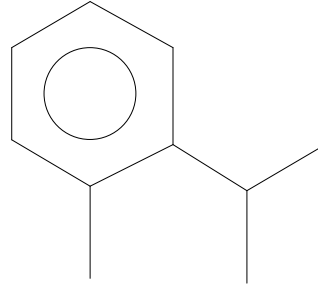

Peak Apex - sample "AerMBR A 092319 (20191119):1", peak 296, at 623.418 , 1.353 sec , sec (Spec # 21935 )

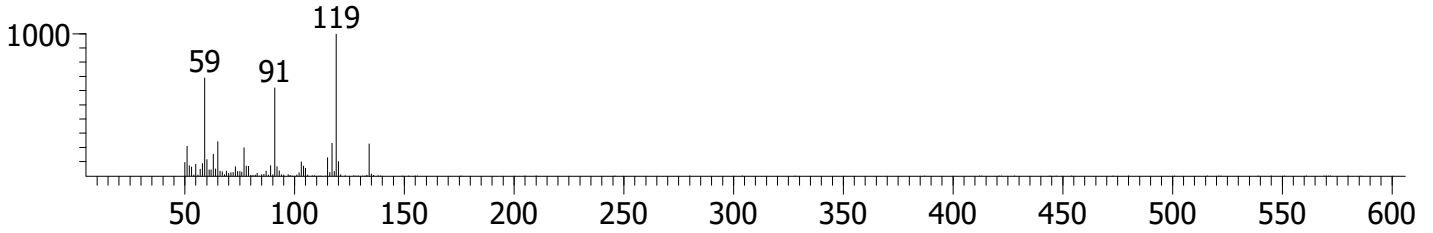

Peak True - sample "AerMBR A 092319 (20191119):1", peak 296, at 623.418 , 1.353 sec , sec (Spec # 21935)

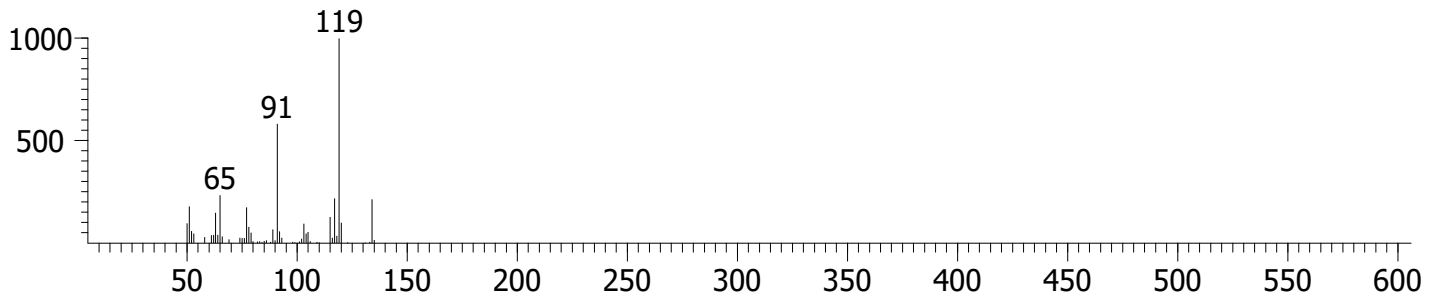

Library Hit - similarity 963, "o-Cymene"

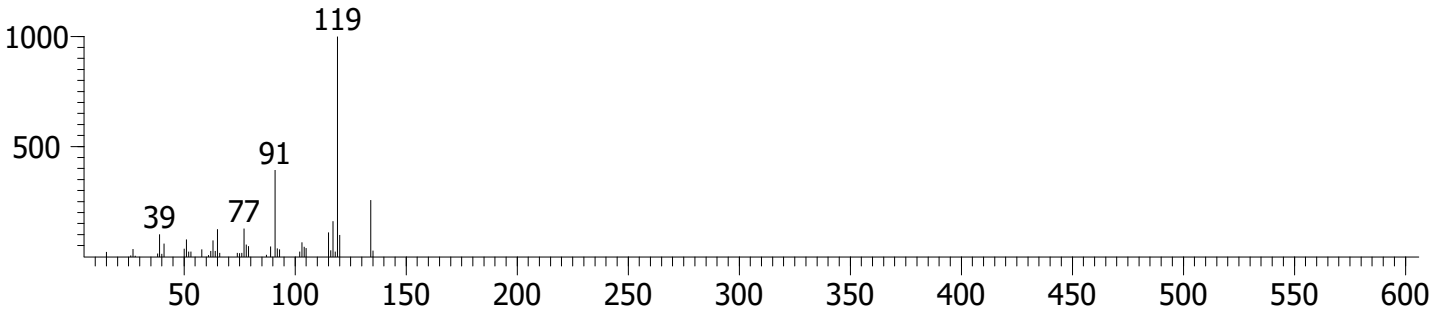

| Hit | Name                                     | Similarity | Probability | CAS       | Library | Formula | Weight |
|-----|------------------------------------------|------------|-------------|-----------|---------|---------|--------|
| 1   | o-Cymene                                 | 963        | 6612        | 527-84-4  | mainlib | C10H14  | 134    |
| 2   | 1,3,5-Cycloheptatriene, 3,7,7-trimethyl- | 903        | 1173        | 3479-89-8 | mainlib | C10H14  | 134    |
| 3   | p-Cymene                                 | 887        | 675         | 99-87-6   | mainlib | C10H14  | 134    |
| 4   | Benzene, 1-methyl-3-(1-methylethyl)-     | 876        | 463         | 535-77-3  | mainlib | C10H14  | 134    |
| 5   | Benzene, 2-ethyl-1,3-dimethyl-           | 829        | 97          | 2870-04-4 | mainlib | C10H14  | 134    |

## Eucalyptol

1st Dimension R.T. = 633.912

2nd Dimension R.T. = 1.333

Quant Mass(es) = 108

S/N = 120.19

Area = 8095.4

Height = 797.19

Similarity = 662

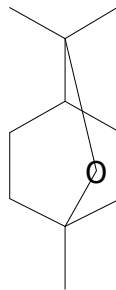

Peak Apex - sample "AerMBR A 092319 (20191119):1", peak 322, at 633.912 , 1.333 sec , sec (Spec # 23522 )

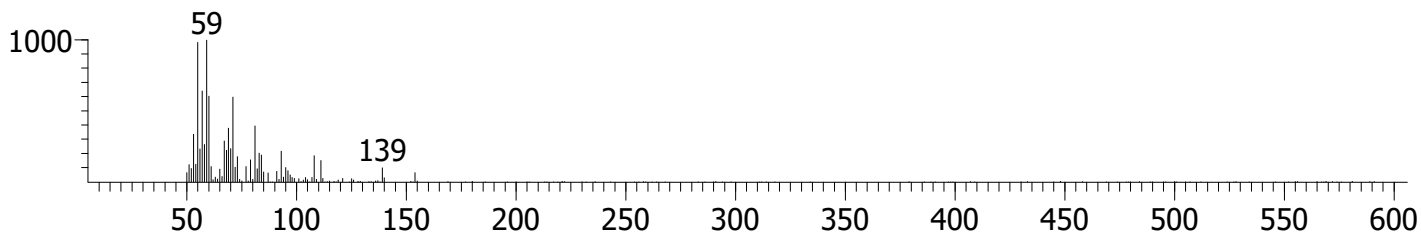

Peak True - sample "AerMBR A 092319 (20191119):1", peak 322, at 633.912 , 1.333 sec , sec (Spec # 23522)

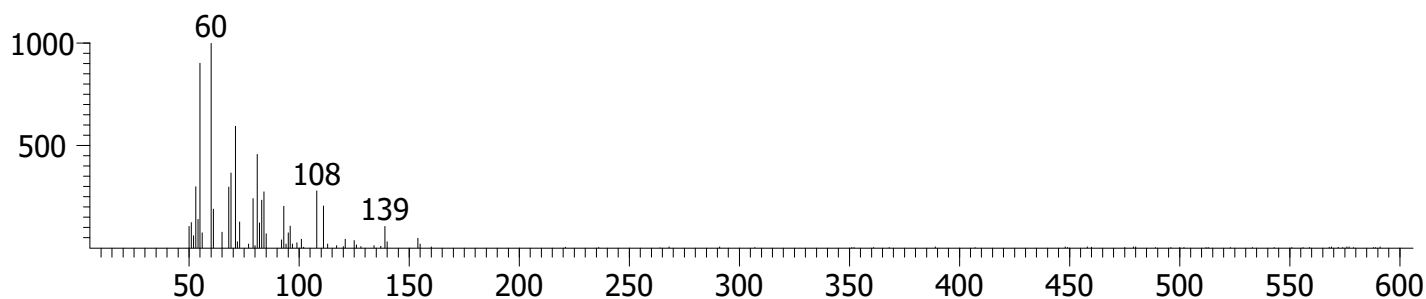

Library Hit - similarity 662, "Eucalyptol"

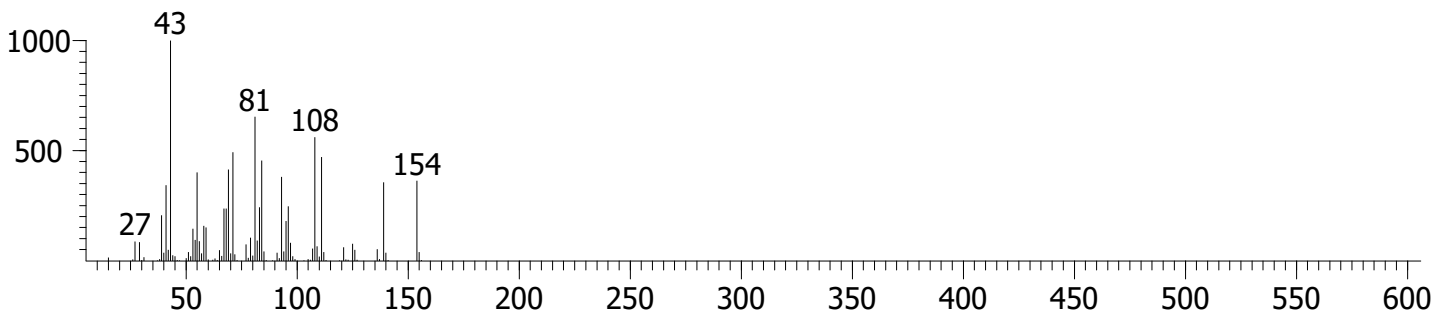

| Hit | Name                                                  | Similarity | Probability | CAS        | Library | Formula  | Weight |
|-----|-------------------------------------------------------|------------|-------------|------------|---------|----------|--------|
| 1   | Eucalyptol                                            | 662        | 2333        | 470-82-6   | mainlib | C10H18O  | 154    |
| 2   | 1,7-Octadien-3-ol, 2,6-dimethyl-                      | 630        | 623         | 22460-59-9 | mainlib | C10H18O  | 154    |
| 3   | 7-Octene-2,6-diol, 2,6-dimethyl-                      | 625        | 502         | 29210-77-3 | mainlib | C10H20O2 | 172    |
| 4   | 6,6-Dimethyl-2-(3-oxobutyl)bicyclo[3.1.1]heptan-3-one | 619        | 394         | 0-00-0     | mainlib | C13H20O2 | 208    |
| 5   | Cyclohexanebutanoic acid                              | 619        | 394         | 4441-63-8  | mainlib | C10H18O2 | 170    |

## 2-Acetyl-5-methylfuran

1st Dimension R.T. = 640.908  
2nd Dimension R.T. = 1.696  
Quant Mass(es) = 109  
S/N = 533.42  
Area = 84844  
Height = 11286  
Similarity = 911

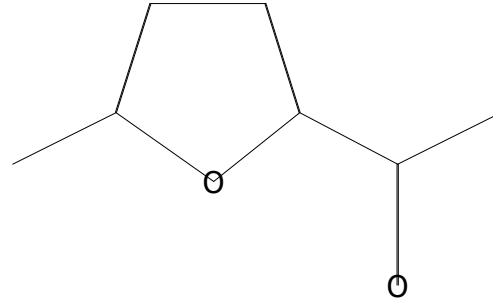

Peak Apex - sample "AerMBR A 092319 (20191119):1", peak 335, at 640.908 , 1.696 sec , sec (Spec # 24637 )

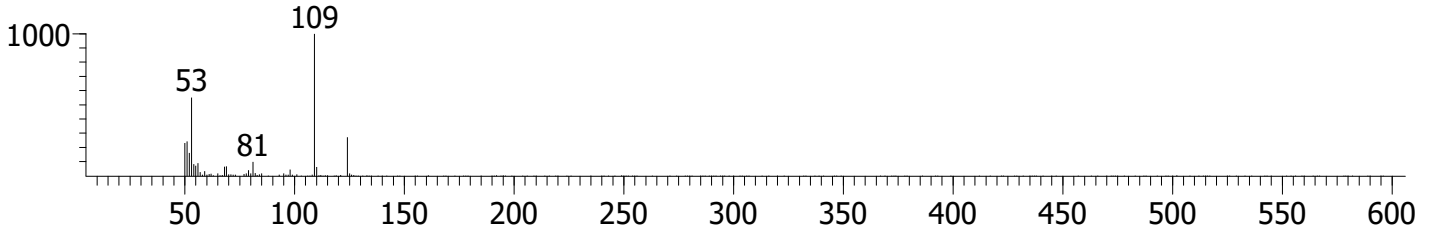

Peak True - sample "AerMBR A 092319 (20191119):1", peak 335, at 640.908 , 1.696 sec , sec (Spec # 24637)

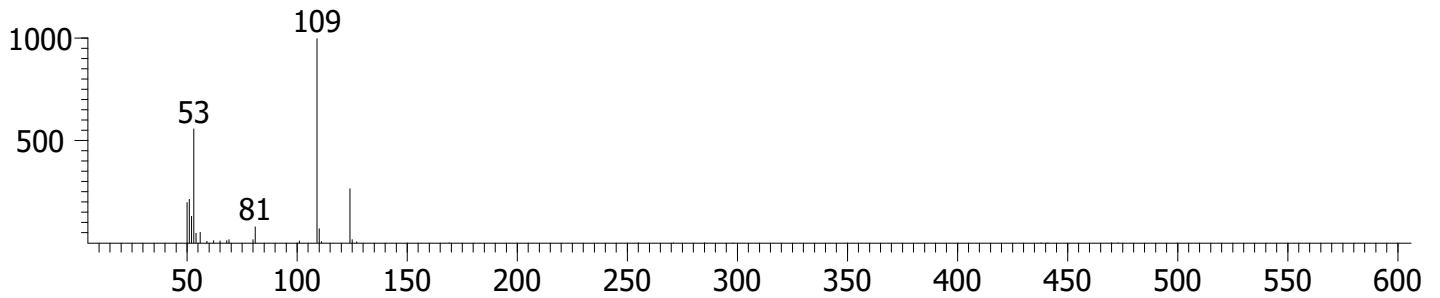

Library Hit - similarity 911, "2-Acetyl-5-methylfuran"

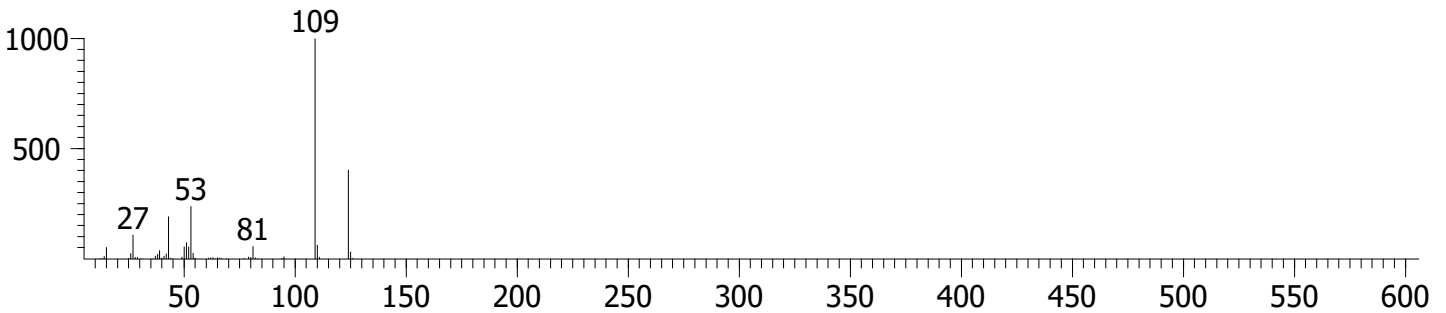

| Hit | Name                                                   | Similarity | Probability | CAS        | Library | Formula    | Weight |
|-----|--------------------------------------------------------|------------|-------------|------------|---------|------------|--------|
| 1   | 2-Acetyl-5-methylfuran                                 | 911        | 7490        | 1193-79-9  | mainlib | C7H8O2     | 124    |
| 2   | 2-Cyclopenten-1-one, 3,5,5-trimethyl-                  | 842        | 1113        | 24156-95-4 | mainlib | C8H12O     | 124    |
| 3   | Elsholtzia ketone                                      | 811        | 303         | 488-05-1   | mainlib | C10H14O2   | 166    |
| 4   | 2-Cyclopenten-1-one, 3,4,4-trimethyl-                  | 808        | 268         | 30434-65-2 | mainlib | C8H12O     | 124    |
| 5   | Furane-2-carboxaldehyde, 5-(3,4-dichlorophenoxyethyl)- | 800        | 200         | 0-00-0     | mainlib | C12H8Cl2O3 | 270    |

## 2,5-Furandione, 3,4-dimethyl-

1st Dimension R.T. = 644.406  
2nd Dimension R.T. = 1.828  
Quant Mass(es) = 54  
S/N = 355.23  
Area = 126516  
Height = 16835  
Similarity = 888

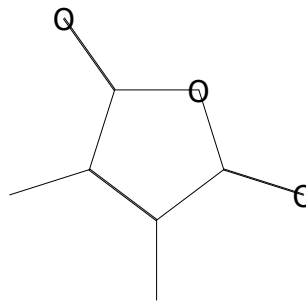

Peak Apex - sample "AerMBR A 092319 (20191119):1", peak 342, at 644.406 , 1.828 sec , sec (Spec # 25187 )

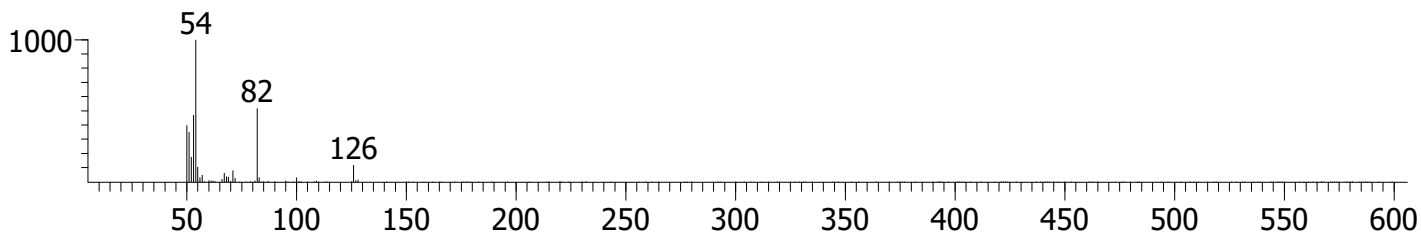

Peak True - sample "AerMBR A 092319 (20191119):1", peak 342, at 644.406 , 1.828 sec , sec (Spec # 25187)

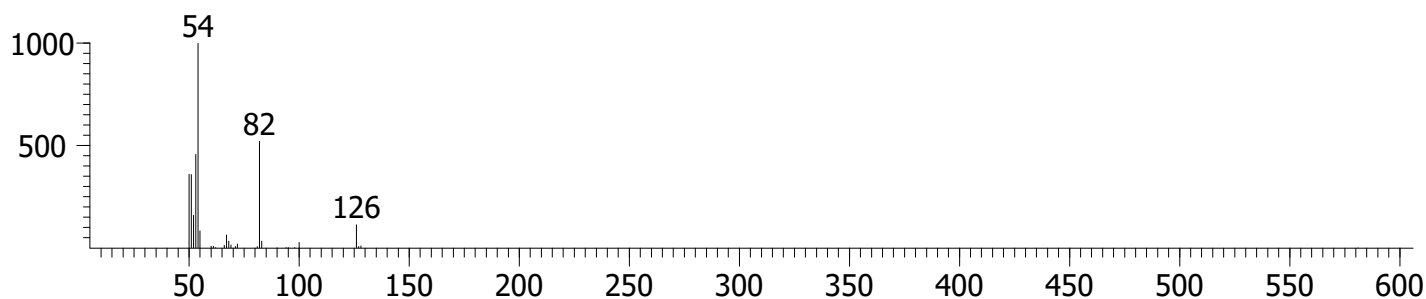

Library Hit - similarity 888, "2,5-Furandione, 3,4-dimethyl-"

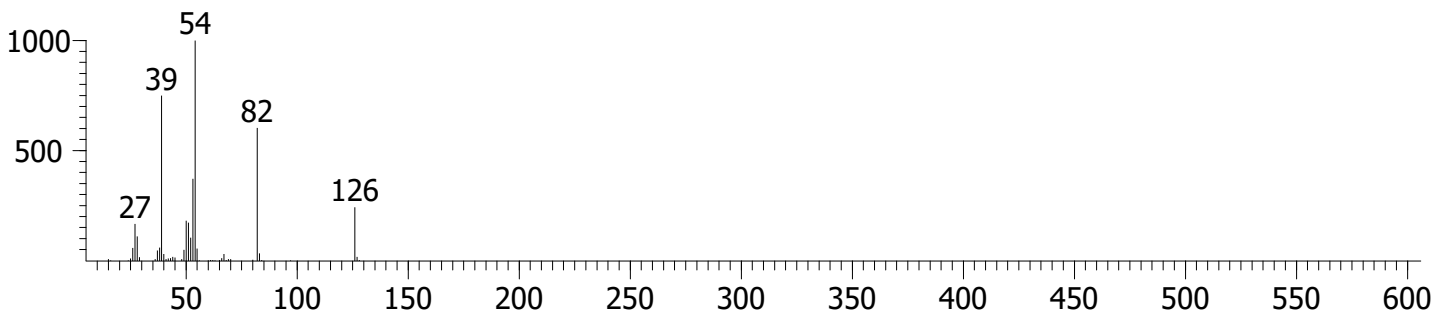

| Hit | Name                                       | Similarity | Probability | CAS         | Library | Formula | Weight |
|-----|--------------------------------------------|------------|-------------|-------------|---------|---------|--------|
| 1   | 2,5-Furandione, 3,4-dimethyl-              | 888        | 7705        | 766-39-2    | mainlib | C6H6O3  | 126    |
| 2   | 1,2-Butadiene                              | 773        | 462         | 590-19-2    | mainlib | C4H6    | 54     |
| 3   | 3-Oxabicyclo[3.2.0]heptane-2,4-dione, cis- | 763        | 326         | 118554-23-7 | mainlib | C6H6O3  | 126    |
| 4   | 1-Butyne                                   | 753        | 230         | 107-00-6    | mainlib | C4H6    | 54     |
| 5   | 3-Cyclobutene-1,2-dione, 3,4-dimethyl-     | 752        | 221         | 1121-15-9   | mainlib | C6H6O2  | 110    |

## 2,4,6-Cycloheptatrien-1-one, 4-methyl-

1st Dimension R.T. = 654.9  
2nd Dimension R.T. = 1.769  
Quant Mass(es) = 91  
S/N = 498.38  
Area = 178736  
Height = 23996  
Similarity = 748

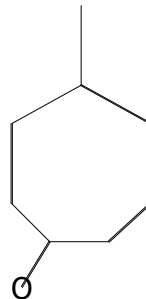

Peak Apex - sample "AerMBR A 092319 (20191119):1", peak 367, at 654.9 , 1.769 sec , sec (Spec # 26768)

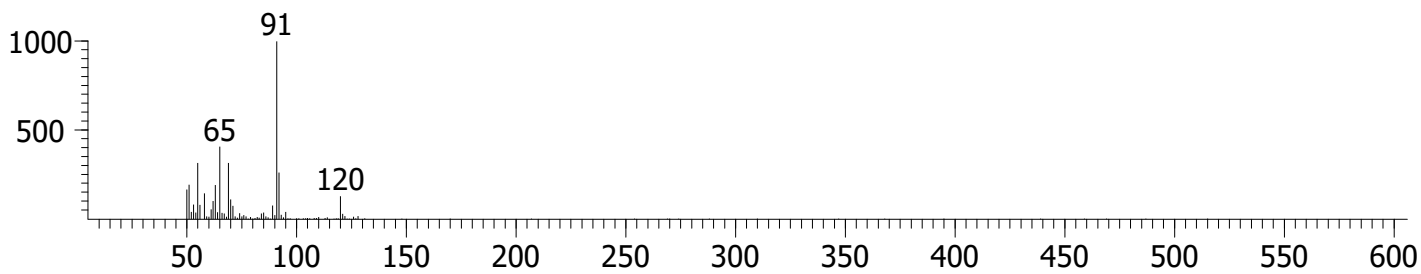

Peak True - sample "AerMBR A 092319 (20191119):1", peak 367, at 654.9 , 1.769 sec , sec (Spec # 26768)

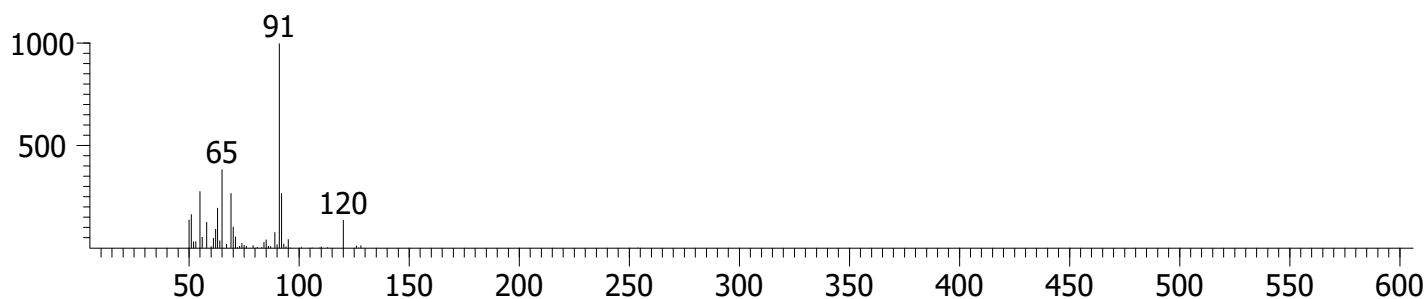

Library Hit - similarity 748, "2,4,6-Cycloheptatrien-1-one, 4-methyl-"

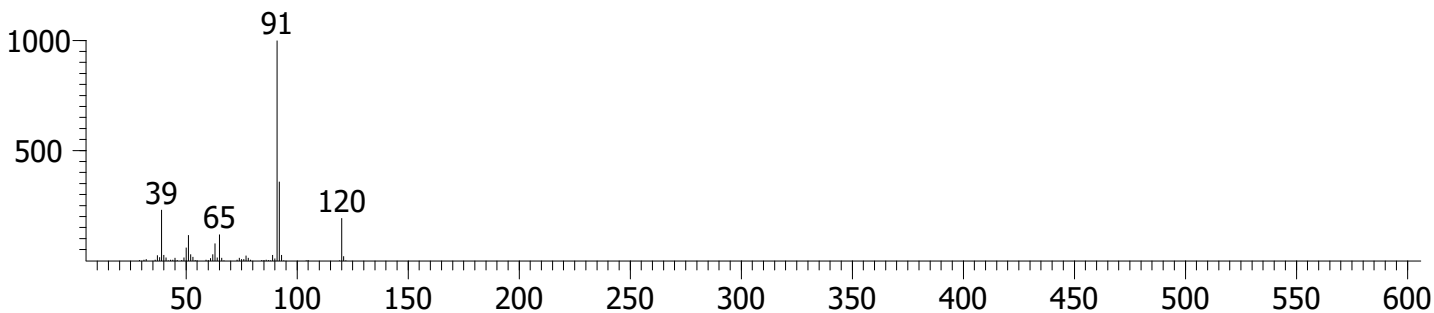

| Hit | Name                                                                  | Similarity | Probability | CAS        | Library | Formula    | Weight |
|-----|-----------------------------------------------------------------------|------------|-------------|------------|---------|------------|--------|
| 1   | 2,4,6-Cycloheptatrien-1-one, 4-methyl-                                | 748        | 839         | 0-00-0     | mainlib | C8H8O      | 120    |
| 2   | Benzeneacetaldehyde                                                   | 745        | 742         | 122-78-1   | mainlib | C8H8O      | 120    |
| 3   | 2-Benzyloxyethylamine                                                 | 741        | 627         | 38336-04-8 | mainlib | C9H13NO    | 151    |
| 4   | Benzaldehyde, 3-benzyloxy-2-fluoro-4-methoxy-                         | 736        | 505         | 0-00-0     | mainlib | C15H13FO3  | 260    |
| 5   | 4-Benzylsulfanyl-6-fluoro-2-trifluoromethyl-pyrimidine-5-carbonitrile | 735        | 485         | 0-00-0     | mainlib | C13H7F4N3S | 313    |

## 2-Pyrrolidinone, 1-methyl-

1st Dimension R.T. = 654.9  
2nd Dimension R.T. = 1.993  
Quant Mass(es) = 99  
S/N = 439.95  
Area = 113976  
Height = 12797  
Similarity = 944

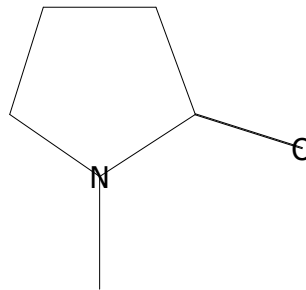

Peak Apex - sample "AerMBR A 092319 (20191119):1", peak 370, at 654.9 , 1.993 sec , sec (Spec # 26802)

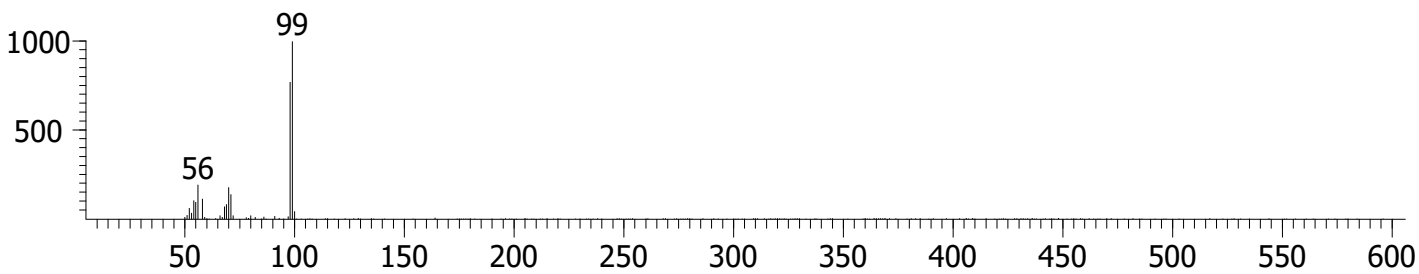

Peak True - sample "AerMBR A 092319 (20191119):1", peak 370, at 654.9 , 1.993 sec , sec (Spec # 26802)

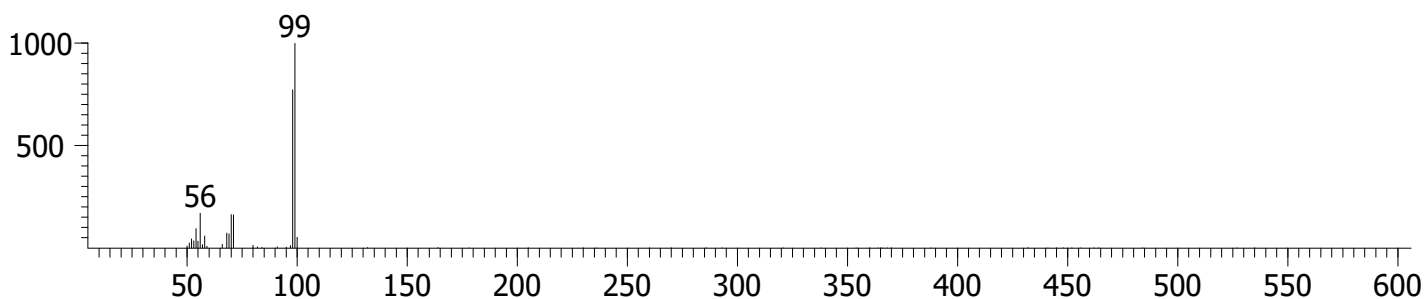

Library Hit - similarity 944, "2-Pyrrolidinone, 1-methyl-"

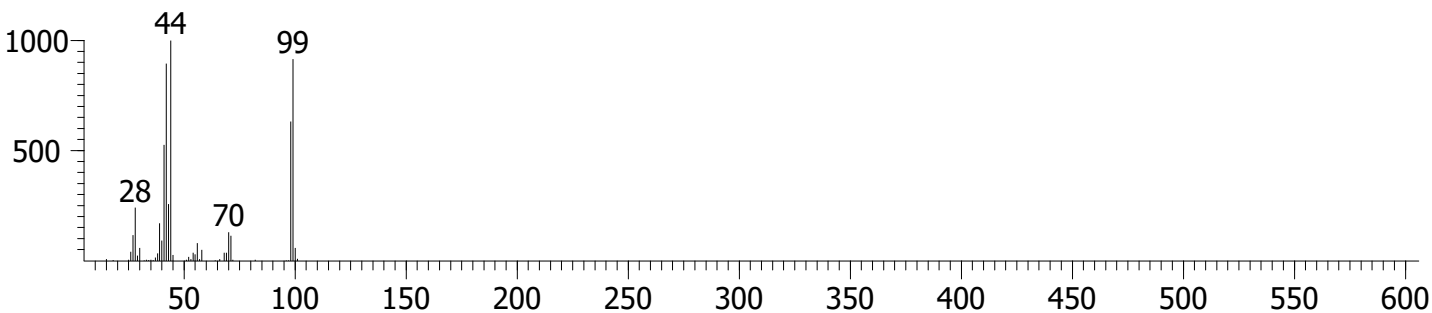

| Hit | Name                                                 | Similarity | Probability | CAS        | Library | Formula   | Weight |
|-----|------------------------------------------------------|------------|-------------|------------|---------|-----------|--------|
| 1   | 2-Pyrrolidinone, 1-methyl-                           | 944        | 8234        | 872-50-4   | mainlib | C5H9NO    | 99     |
| 2   | 4-(Methylamino)butyric acid                          | 881        | 1380        | 1119-48-8  | mainlib | C5H11NO2  | 117    |
| 3   | 4,4'-Bi-1,3,2-dioxaborolane, 2,2'-diethyl-, (R*,S*)- | 804        | 168         | 62337-94-4 | mainlib | C8H16B2O4 | 198    |
| 4   | 2-Pyrrolidinone, 1-(2-aminoethyl)-                   | 783        | 71          | 24935-08-8 | mainlib | C6H12N2O  | 128    |
| 5   | Cyclopropanecarboxamide, N-(4-methyl-1-piperazinyl)- | 763        | 32          | 0-00-0     | mainlib | C9H17N3O  | 183    |

## 4-Methyl-5H-furan-2-one

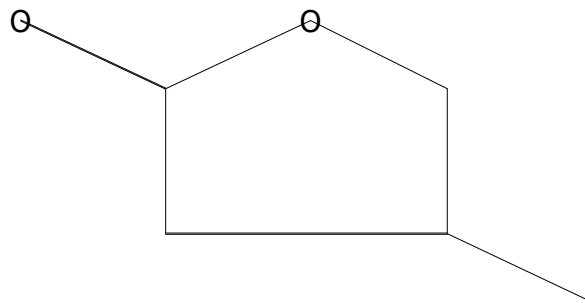

1st Dimension R.T. = 658.398

2nd Dimension R.T. = 2.138

Quant Mass(es) = 69

S/N = 219.27

Area = 111840

Height = 12860

Similarity = 928

Peak Apex - sample "AerMBR A 092319 (20191119):1", peak 380, at 658.398 , 2.138 sec , sec (Spec # 27354 )

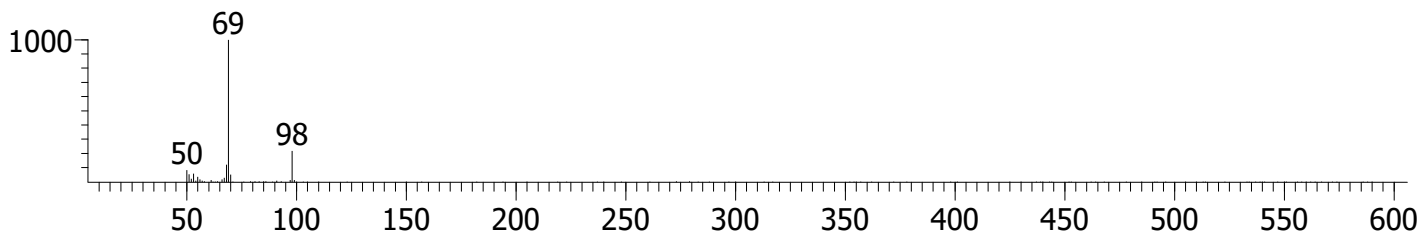

Peak True - sample "AerMBR A 092319 (20191119):1", peak 380, at 658.398 , 2.138 sec , sec (Spec # 27354)

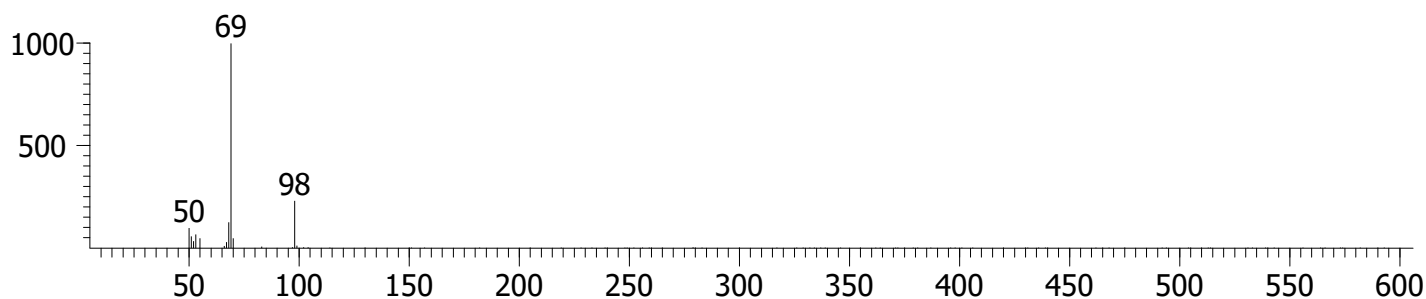

Library Hit - similarity 928, "4-Methyl-5H-furan-2-one"

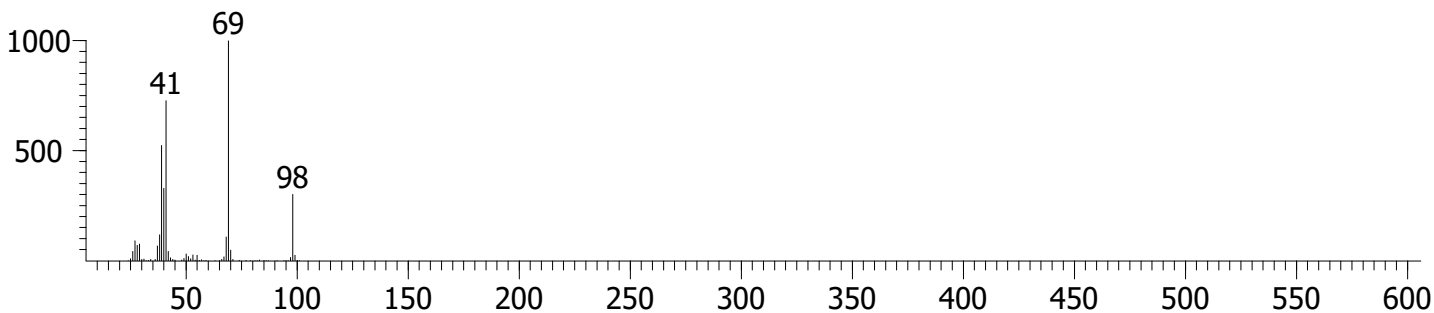

| Hit | Name                         | Similarity | Probability | CAS        | Library | Formula | Weight |
|-----|------------------------------|------------|-------------|------------|---------|---------|--------|
| 1   | 4-Methyl-5H-furan-2-one      | 928        | 8221        | 6124-79-4  | mainlib | C5H6O2  | 98     |
| 2   | 1-Propanone, 1-cyclopropyl-  | 855        | 1119        | 6704-19-4  | mainlib | C6H10O  | 98     |
| 3   | 4-Hexen-3-one                | 814        | 255         | 2497-21-4  | mainlib | C6H10O  | 98     |
| 4   | 2(5H)-Furanone, 3-methyl-    | 810        | 215         | 22122-36-7 | mainlib | C5H6O2  | 98     |
| 5   | Di(1-methylcyclobutyl) ether | 774        | 53          | 86301-90-8 | mainlib | C10H18O | 154    |

## 2-Cyclohexen-1-one, 3-methyl-

1st Dimension R.T. = 672.39  
2nd Dimension R.T. = 1.795  
Quant Mass(es) = 82  
S/N = 239.41  
Area = 36846  
Height = 4337.4  
Similarity = 808

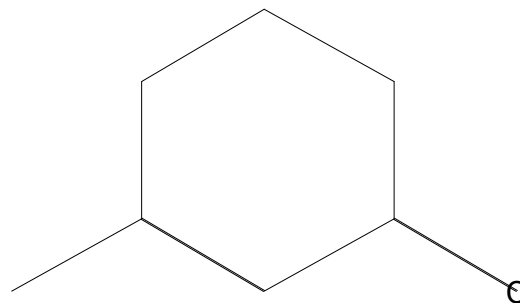

Peak Apex - sample "AerMBR A 092319 (20191119):1", peak 406, at 672.39 , 1.795 sec , sec (Spec # 29422)

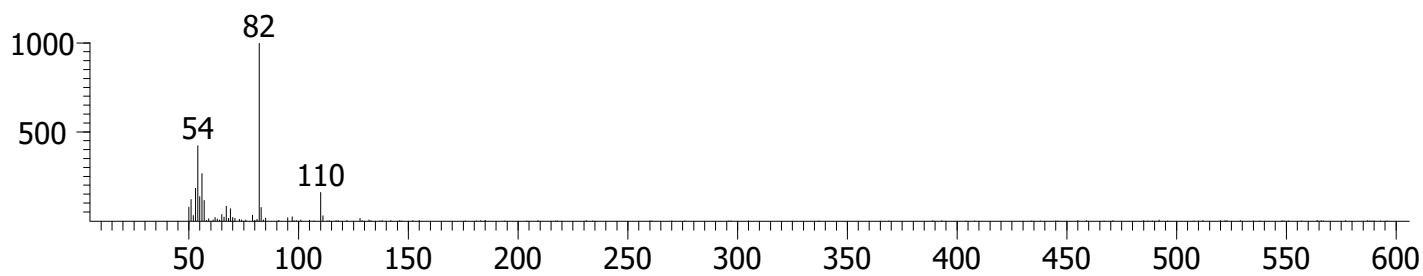

Peak True - sample "AerMBR A 092319 (20191119):1", peak 406, at 672.39 , 1.795 sec , sec (Spec # 29422)

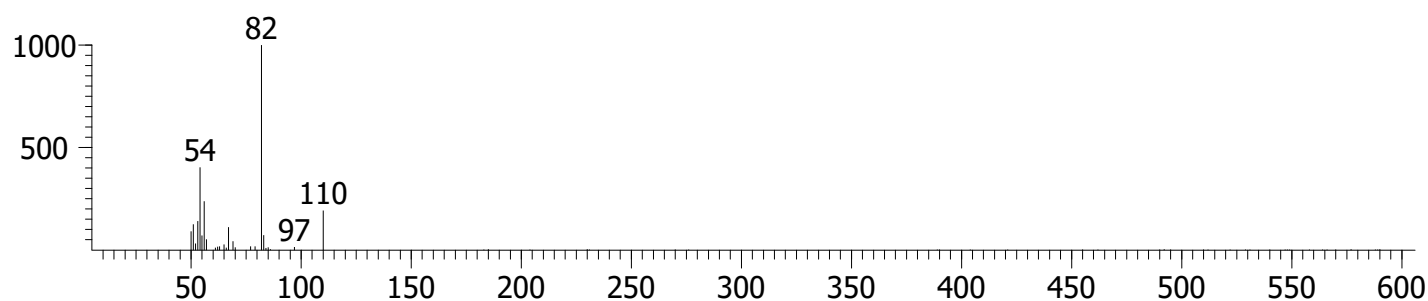

Library Hit - similarity 808, "2-Cyclohexen-1-one, 3-methyl-"

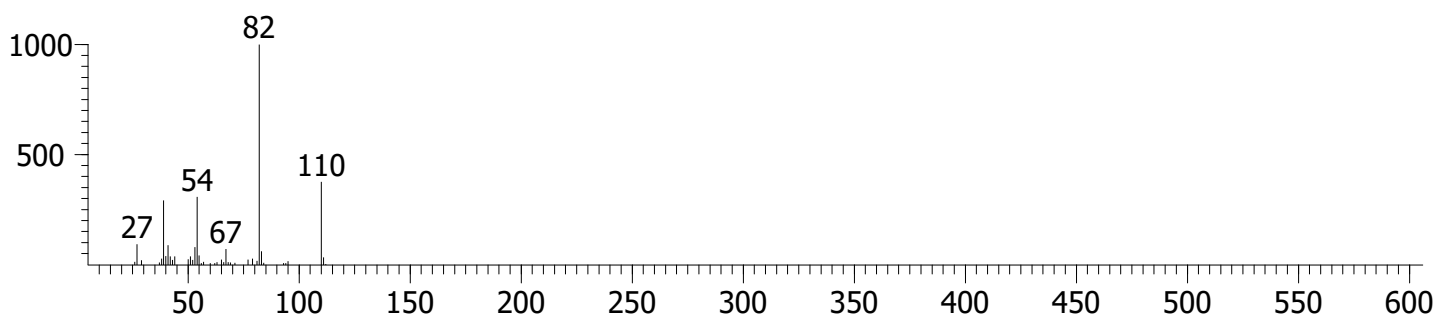

| Hit | Name                                                           | Similarity | Probability | CAS        | Library | Formula    | Weight |
|-----|----------------------------------------------------------------|------------|-------------|------------|---------|------------|--------|
| 1   | 2-Cyclohexen-1-one, 3-methyl-                                  | 808        | 4087        | 1193-18-6  | mainlib | C7H10O     | 110    |
| 2   | 2-Cyclohexen-1-one, 2-methyl-                                  | 807        | 3928        | 1121-18-2  | mainlib | C7H10O     | 110    |
| 3   | 2-Cyclohexen-1-one, 6-(1-hydroxy-1-methylethyl)-3-methyl-      | 764        | 866         | 87791-00-2 | mainlib | C10H16O2   | 168    |
| 4   | Pyrazole-3-propanoic acid, á-(trans-2-hydroxycyclohexylamino)- | 722        | 194         | 0-00-0     | mainlib | C12H19N3O3 | 253    |
| 5   | 2-Cyclohexen-1-one, 3,5-dimethyl-                              | 721        | 186         | 1123-09-7  | mainlib | C8H12O     | 124    |



# Ethanone, 1-(1H-pyrrol-2-yl)-

1st Dimension R.T. = 675.888  
2nd Dimension R.T. = 1.848  
Quant Mass(es) = 94  
S/N = 74.829  
Area = 8804.7  
Height = 1062.1  
Similarity = 813

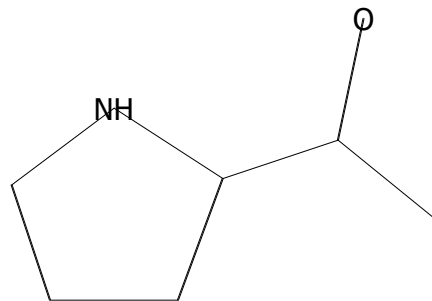

Peak Apex - sample "AerMBR A 092319 (20191119):1", peak 413, at 675.888 , 1.848 sec , sec (Spec # 29960 )

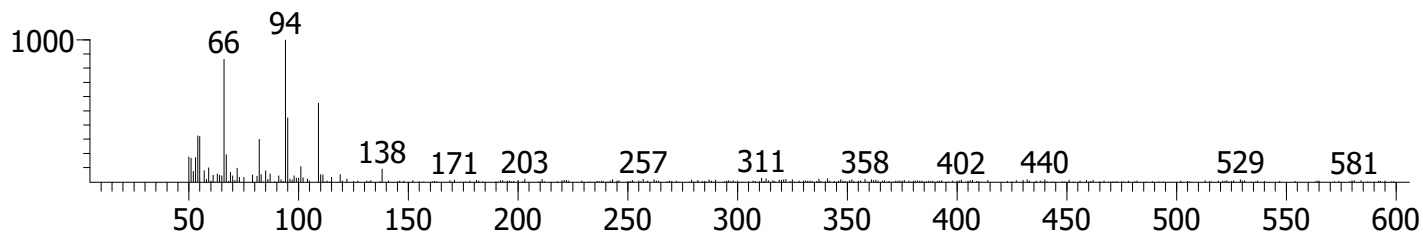

Peak True - sample "AerMBR A 092319 (20191119):1", peak 413, at 675.888 , 1.848 sec , sec (Spec # 29960)

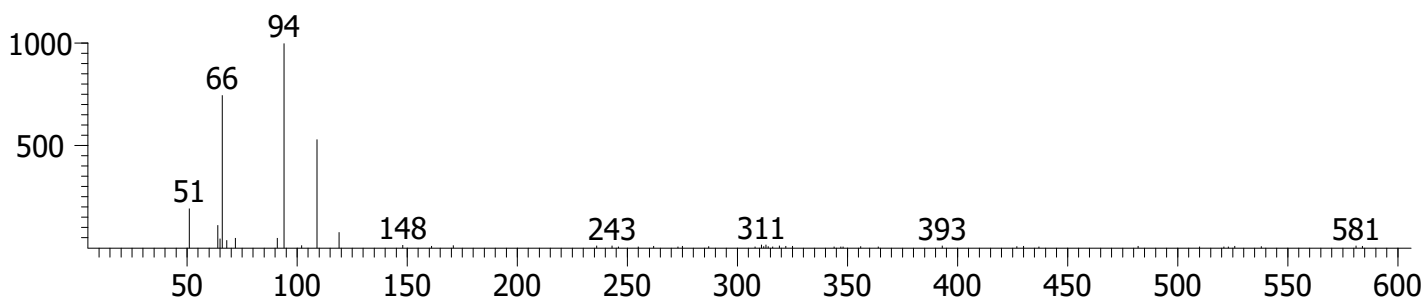

Library Hit - similarity 813, "Ethanone, 1-(1H-pyrrol-2-yl)-"

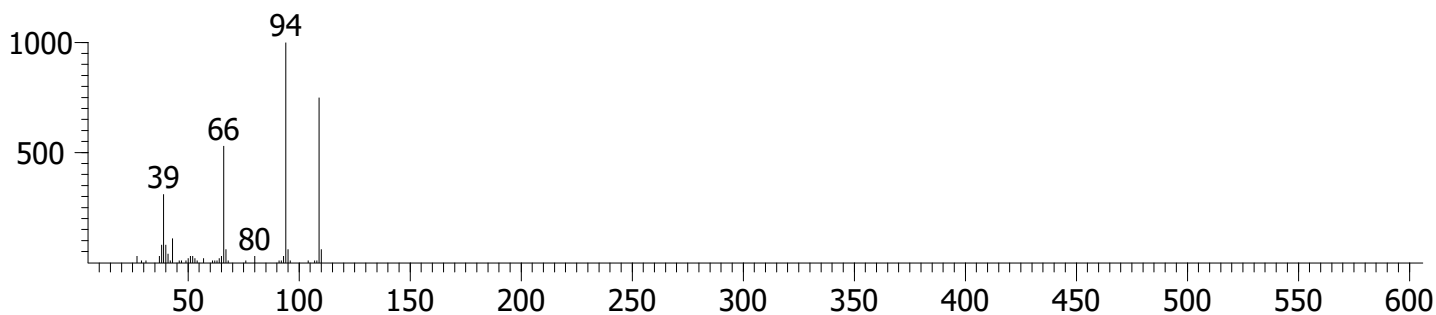

| Hit | Name                          | Similarity | Probability | CAS       | Library | Formula | Weight |
|-----|-------------------------------|------------|-------------|-----------|---------|---------|--------|
| 1   | Ethanone, 1-(1H-pyrrol-2-yl)- | 813        | 8178        | 1072-83-9 | mainlib | C6H7NO  | 109    |
| 2   | 3-Acetyl-1H-pyrroline         | 761        | 1633        | 1072-82-8 | mainlib | C6H7NO  | 109    |
| 3   | Pyrrole, 4-ethyl-2-methyl-    | 632        | 68          | 5690-96-0 | mainlib | C7H11N  | 109    |
| 4   | Pyrimidine, 5-methyl-         | 623        | 50          | 2036-41-1 | mainlib | C5H6N2  | 94     |
| 5   | 3-Aminopyridine               | 605        | 25          | 462-08-8  | mainlib | C5H6N2  | 94     |

Benzeneacetaldehyde, à-methyl-

1st Dimension R.T. = 682.884  
2nd Dimension R.T. = 1.419  
Quant Mass(es) = 105  
S/N = 648.82  
Area = 106601  
Height = 15159  
Similarity = 913

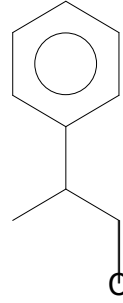

Peak Apex - sample "AerMBR A 092319 (20191119):1", peak 422, at 682.884 , 1.419 sec , sec (Spec # 30955 )

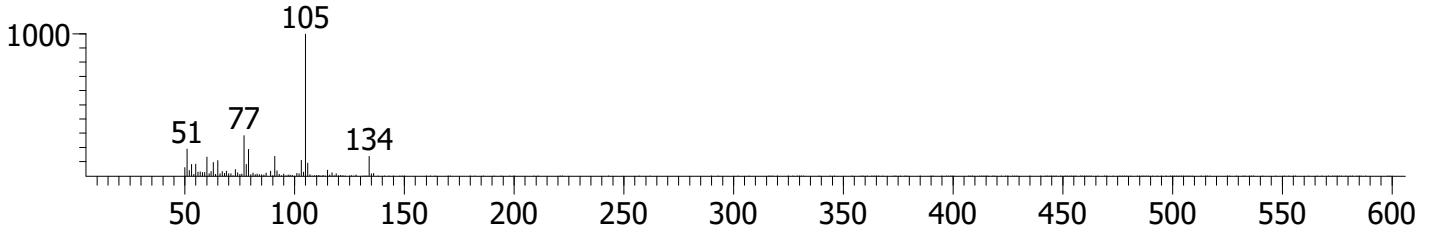

Peak True - sample "AerMBR A 092319 (20191119):1", peak 422, at 682.884 , 1.419 sec , sec (Spec # 30955)

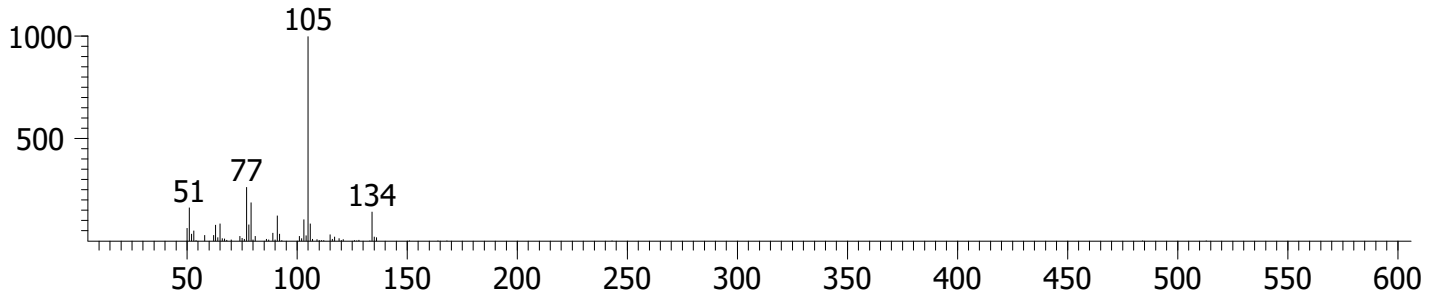

Library Hit - similarity 913, "Benzeneacetaldehyde, à-methyl-"

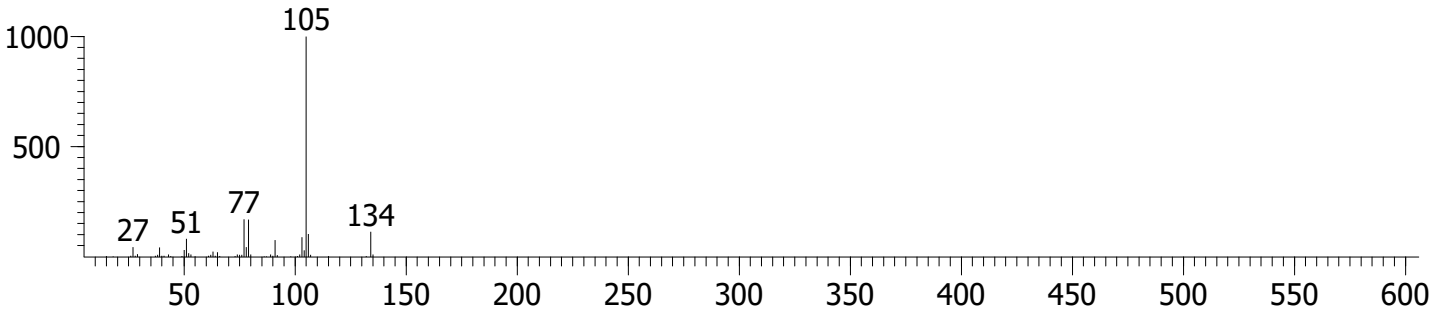

| Hit | Name                           | Similarity | Probability | CAS        | Library | Formula | Weight |
|-----|--------------------------------|------------|-------------|------------|---------|---------|--------|
| 1   | Benzeneacetaldehyde, à-methyl- | 913        | 2048        | 93-53-8    | mainlib | C9H10O  | 134    |
| 2   | Benzeneacetaldehyde, 4-methyl- | 901        | 1364        | 104-09-6   | mainlib | C9H10O  | 134    |
| 3   | Hydratropaldehyde              | 896        | 1099        | 34713-70-7 | mainlib | C9H10O  | 134    |
| 4   | Benzene, 1-methyl-2-propyl-    | 891        | 886         | 1074-17-5  | mainlib | C10H14  | 134    |
| 5   | Benzene, (1-methylpropyl)-     | 889        | 817         | 135-98-8   | mainlib | C10H14  | 134    |

## Acetophenone

1st Dimension R.T. = 686.382  
2nd Dimension R.T. = 1.775  
Quant Mass(es) = 105  
S/N = 4308.2  
Area = 751101  
Height = 99588  
Similarity = 952

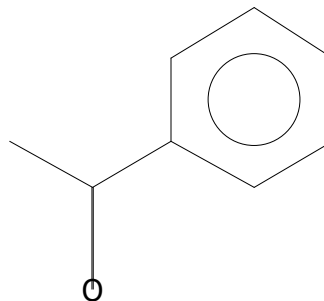

Peak Apex - sample "AerMBR A 092319 (20191119):1", peak 431, at 686.382 , 1.775 sec , sec (Spec # 31539 )

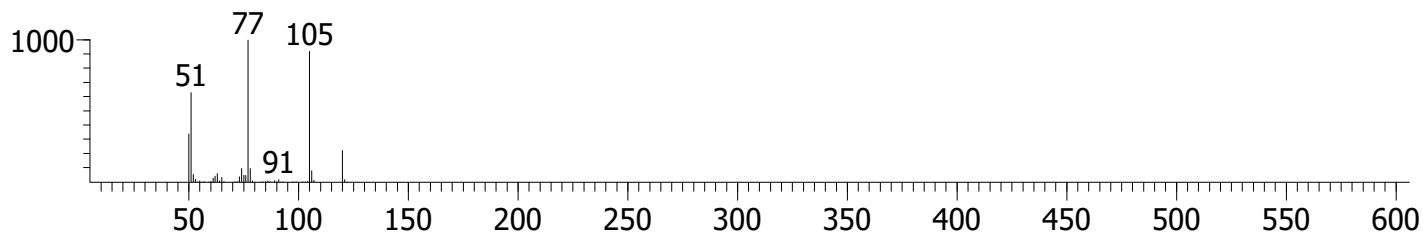

Peak True - sample "AerMBR A 092319 (20191119):1", peak 431, at 686.382 , 1.775 sec , sec (Spec # 31539)

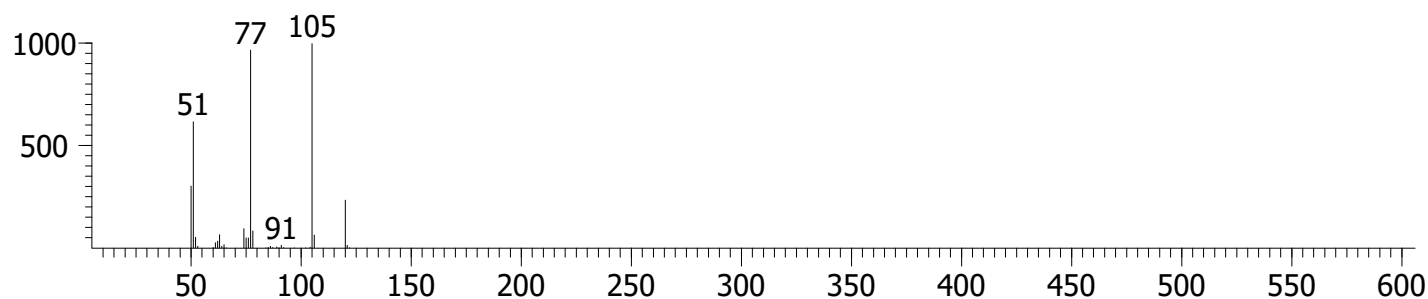

Library Hit - similarity 952, "Acetophenone"

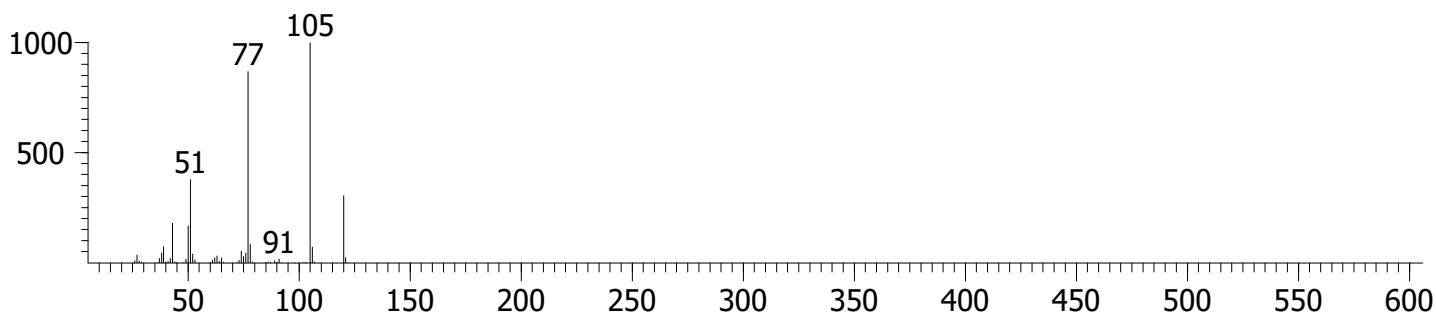

| Hit | Name                                       | Similarity | Probability | CAS        | Library | Formula    | Weight |
|-----|--------------------------------------------|------------|-------------|------------|---------|------------|--------|
| 1   | Acetophenone                               | 952        | 4931        | 98-86-2    | mainlib | C8H8O      | 120    |
| 2   | 5-Benzoylpentanoic acid                    | 909        | 1087        | 4144-62-1  | mainlib | C12H14O3   | 206    |
| 3   | ç-Chlorobutyrophenone                      | 898        | 746         | 939-52-6   | mainlib | C10H11ClO  | 182    |
| 4   | N-(5-Ethyl-1,3,4-thiadiazol-2-yl)benzamide | 871        | 219         | 36231-88-6 | mainlib | C11H11N3OS | 233    |
| 5   | 1-Pentanone, 1-phenyl-                     | 871        | 219         | 1009-14-9  | mainlib | C11H14O    | 162    |

## 2(3H)-Furanone, dihydro-3,3-dimethyl-

1st Dimension R.T. = 686.382  
2nd Dimension R.T. = 1.940  
Quant Mass(es) = 56  
S/N = 243.42  
Area = 119254  
Height = 14556  
Similarity = 857

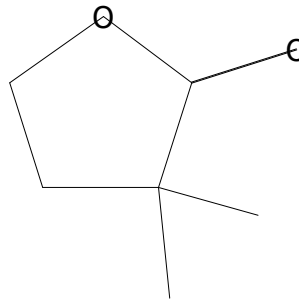

Peak Apex - sample "AerMBR A 092319 (20191119):1", peak 433, at 686.382 , 1.940 sec , sec (Spec # 31564 )

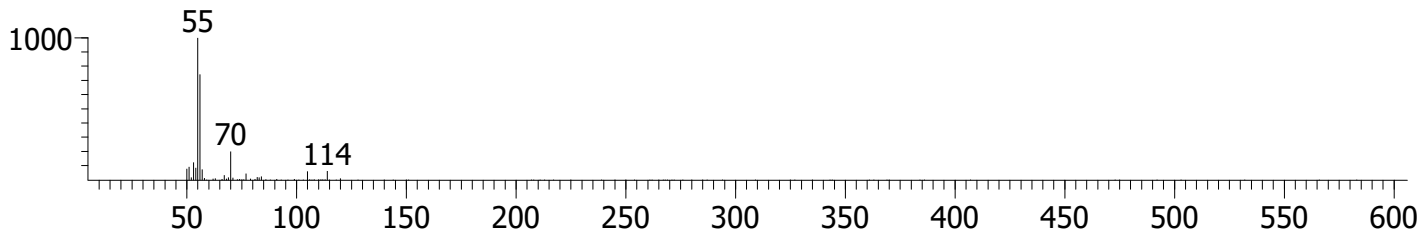

Peak True - sample "AerMBR A 092319 (20191119):1", peak 433, at 686.382 , 1.940 sec , sec (Spec # 31564)

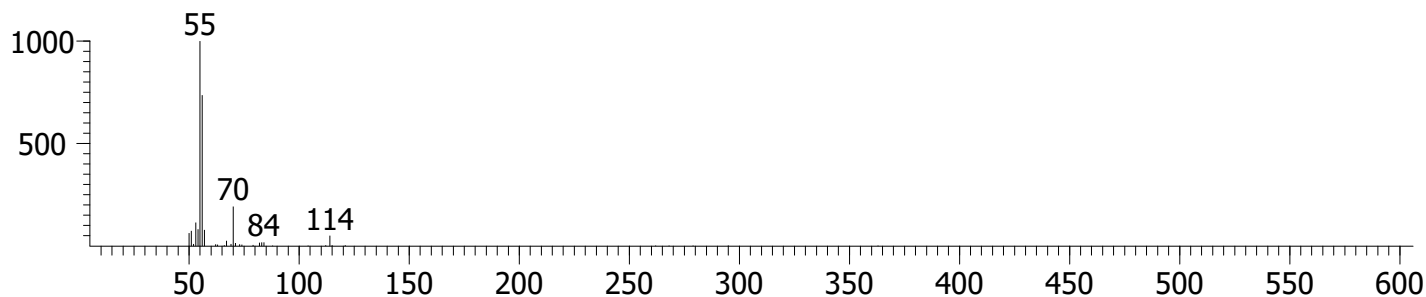

Library Hit - similarity 857, "2(3H)-Furanone, dihydro-3,3-dimethyl-"

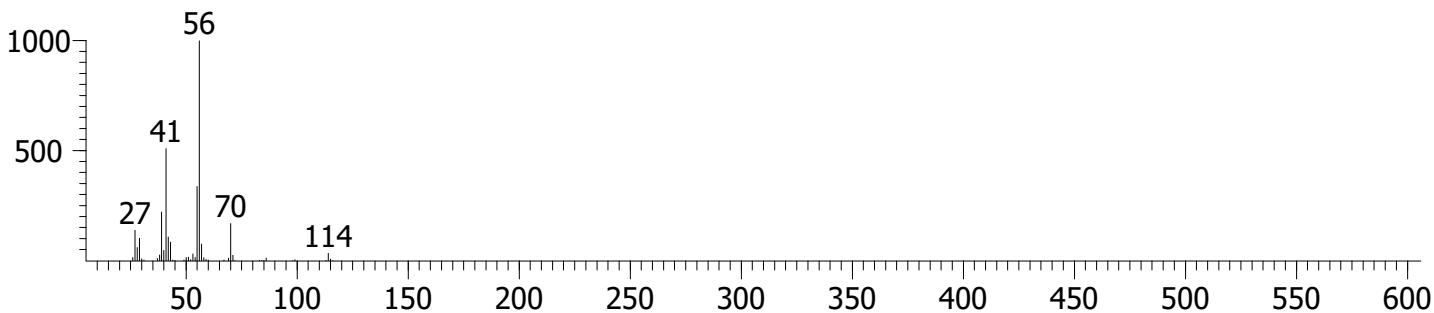

| Hit | Name                                  | Similarity | Probability | CAS       | Library | Formula | Weight |
|-----|---------------------------------------|------------|-------------|-----------|---------|---------|--------|
| 1   | 2(3H)-Furanone, dihydro-3,3-dimethyl- | 857        | 3384        | 3709-08-8 | mainlib | C6H10O2 | 114    |
| 2   | 1-Pentene, 3,4-dimethyl-              | 804        | 669         | 7385-78-6 | mainlib | C7H14   | 98     |
| 3   | 2-Butene, (Z)-                        | 802        | 617         | 590-18-1  | mainlib | C4H8    | 56     |
| 4   | Cyclopropane, butyl-                  | 799        | 545         | 930-57-4  | mainlib | C7H14   | 98     |
| 5   | 1-Butene                              | 796        | 482         | 106-98-9  | mainlib | C4H8    | 56     |

## 2-Pyrrolidinone

1st Dimension R.T. = 696.876  
2nd Dimension R.T. = 2.211  
Quant Mass(es) = 85  
S/N = 191.55  
Area = 141134  
Height = 13334  
Similarity = 908

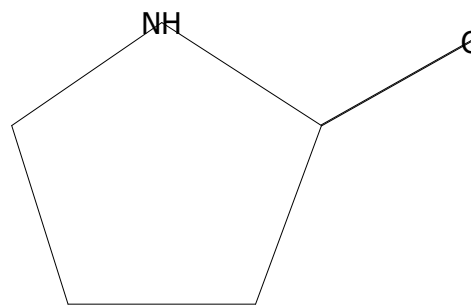

Peak Apex - sample "AerMBR A 092319 (20191119):1", peak 457, at 696.876 , 2.211 sec , sec (Spec # 33195 )

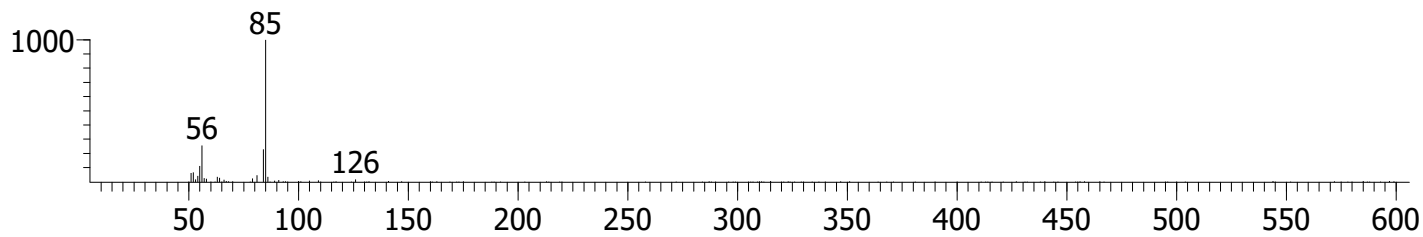

Peak True - sample "AerMBR A 092319 (20191119):1", peak 457, at 696.876 , 2.211 sec , sec (Spec # 33195)

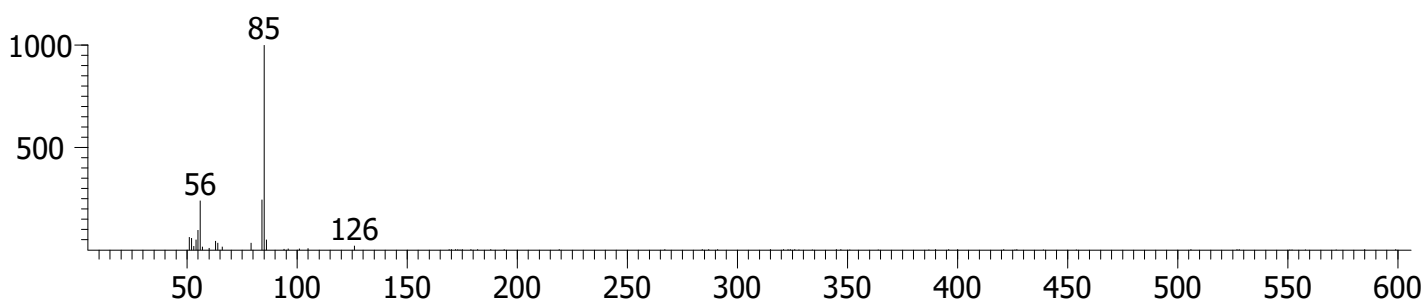

Library Hit - similarity 908, "2-Pyrrolidinone"

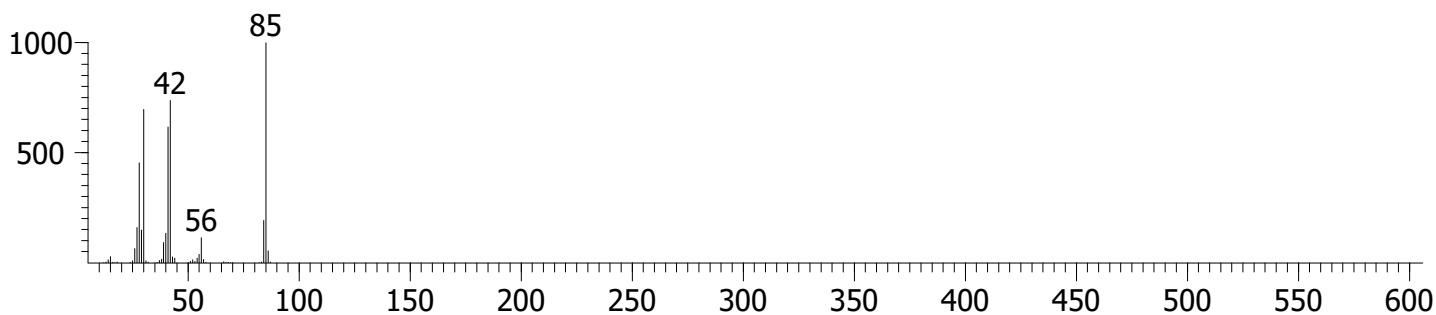

| Hit | Name                                                   | Similarity | Probability | CAS         | Library | Formula  | Weight |
|-----|--------------------------------------------------------|------------|-------------|-------------|---------|----------|--------|
| 1   | 2-Pyrrolidinone                                        | 908        | 7210        | 616-45-5    | mainlib | C4H7NO   | 85     |
| 2   | 5-Methyl-2-(2-methyl-2-tetrahydrofuryl)tetrahydrofuran | 846        | 1232        | 0-00-0      | mainlib | C10H18O2 | 170    |
| 3   | Pyrrolidine, 3-methyl-                                 | 808        | 295         | 34375-89-8  | mainlib | C5H11N   | 85     |
| 4   | Cyclobutene-3,4-dione, 1-dimethylamino-2-hydroxy-      | 801        | 226         | 182881-06-7 | mainlib | C6H7NO3  | 141    |
| 5   | Succinic acid, di(2-methylpent-3-yl) ester             | 796        | 182         | 0-00-0      | mainlib | C16H30O4 | 286    |

## Undecane, 5,7-dimethyl-

1st Dimension R.T. = 710.868

2nd Dimension R.T. = 1.102

Quant Mass(es) = 71

S/N = 1025.2

Area = 176331

Height = 23102

Similarity = 889

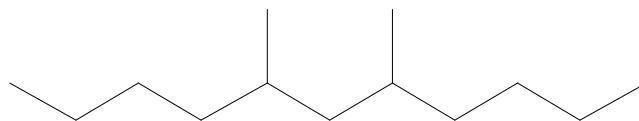

Peak Apex - sample "AerMBR A 092319 (20191119):1", peak 482, at 710.868 , 1.102 sec , sec (Spec # 35147 )

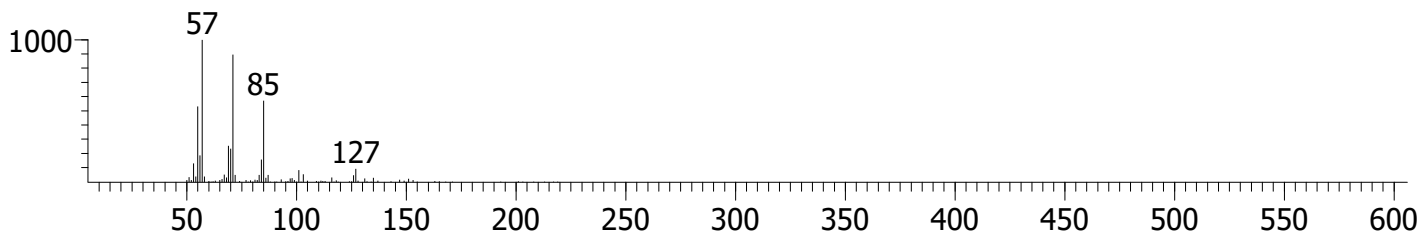

Peak True - sample "AerMBR A 092319 (20191119):1", peak 482, at 710.868 , 1.102 sec , sec (Spec # 35147)

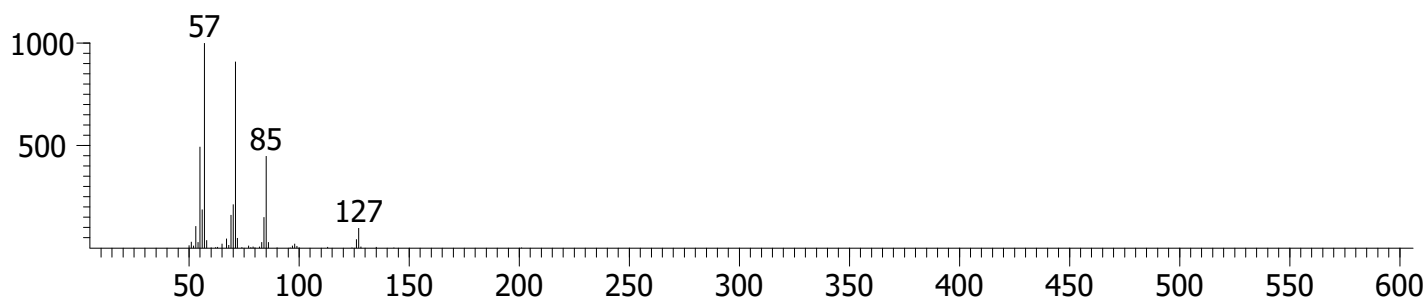

Library Hit - similarity 889, "Undecane, 5,7-dimethyl-"

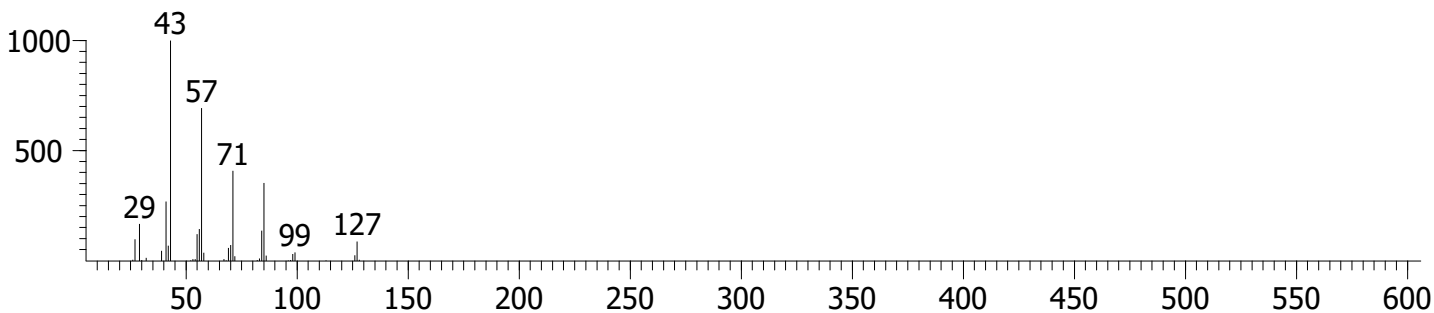

| Hit | Name                                  | Similarity | Probability | CAS        | Library | Formula  | Weight |
|-----|---------------------------------------|------------|-------------|------------|---------|----------|--------|
| 1   | Undecane, 5,7-dimethyl-               | 889        | 1781        | 17312-83-3 | mainlib | C13H28   | 184    |
| 2   | Undecane, 3,7-dimethyl-               | 877        | 1186        | 17301-29-0 | mainlib | C13H28   | 184    |
| 3   | Octane, 2,3,6,7-tetramethyl-          | 869        | 885         | 52670-34-5 | mainlib | C12H26   | 170    |
| 4   | Undecane, 4,7-dimethyl-               | 858        | 607         | 17301-32-5 | mainlib | C13H28   | 184    |
| 5   | Oxalic acid, isohexyl neopentyl ester | 855        | 536         | 0-00-0     | mainlib | C13H24O4 | 244    |

## Benzenemethanethiol

1st Dimension R.T. = 710.868  
2nd Dimension R.T. = 1.782  
Quant Mass(es) = 91  
S/N = 72.462  
Area = 23731  
Height = 2729.5  
Similarity = 912

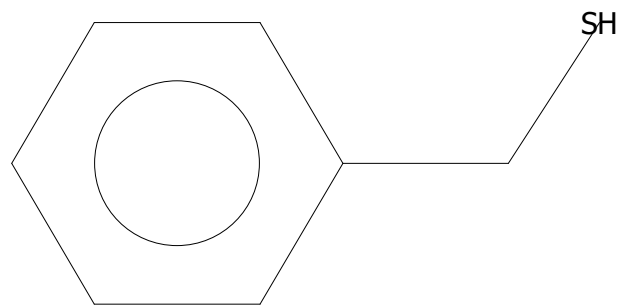

Peak Apex - sample "AerMBR A 092319 (20191119):1", peak 489, at 710.868 , 1.782 sec , sec (Spec # 35250 )

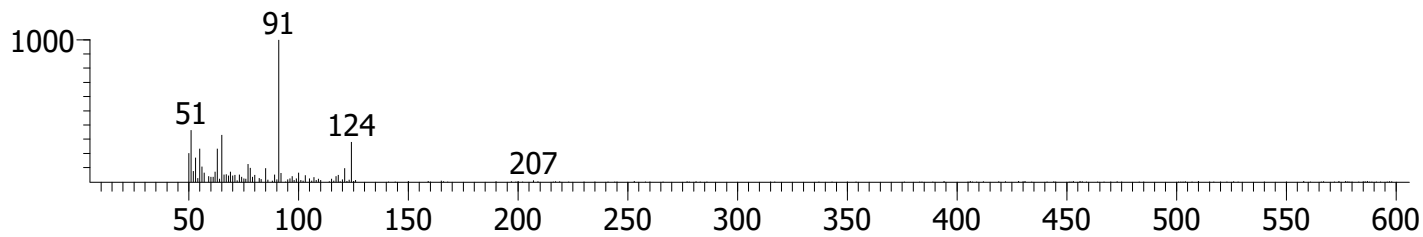

Peak True - sample "AerMBR A 092319 (20191119):1", peak 489, at 710.868 , 1.782 sec , sec (Spec # 35250)

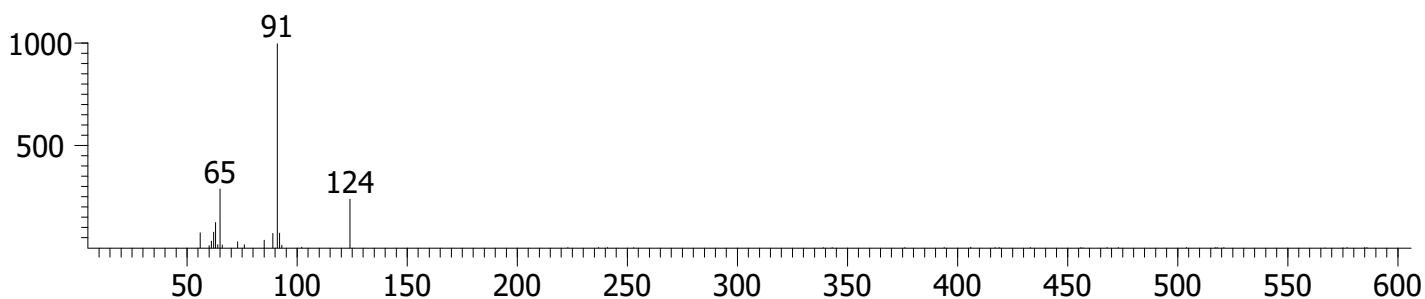

Library Hit - similarity 912, "Benzenemethanethiol"

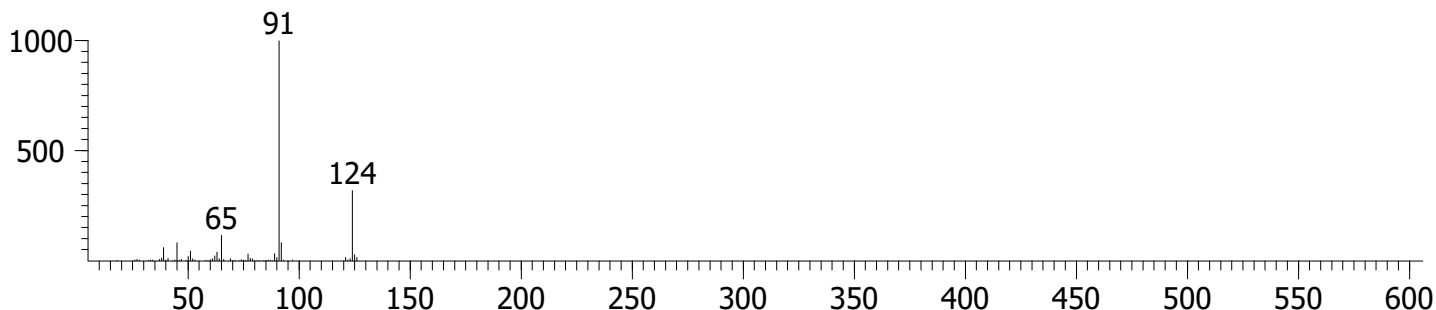

| Hit | Name                                                      | Similarity | Probability | CAS        | Library | Formula       | Weight |
|-----|-----------------------------------------------------------|------------|-------------|------------|---------|---------------|--------|
| 1   | Benzenemethanethiol                                       | 912        | 4368        | 100-53-8   | mainlib | C7H8S         | 124    |
| 2   | (2-Chloro-4-nitrophenyl)thiocarbamic acid, S-benzyl ester | 852        | 775         | 0-00-0     | mainlib | C14H11ClN2O3S | 322    |
| 3   | Benzonitrile, 2-chloro-6-(phenylmethoxy)-                 | 848        | 655         | 92161-40-5 | mainlib | C14H10ClNO    | 243    |
| 4   | Phenylmethanesulfonylacetic acid                          | 832        | 377         | 0-00-0     | mainlib | C9H10O4S      | 214    |
| 5   | Benzenemethanesulfonamide                                 | 829        | 333         | 4563-33-1  | mainlib | C7H9NO2S      | 171    |

## Phenol, 2-methoxy-

1st Dimension R.T. = 717.864  
2nd Dimension R.T. = 1.756  
Quant Mass(es) = 109  
S/N = 1565.0  
Area = 251575  
Height = 33177  
Similarity = 923

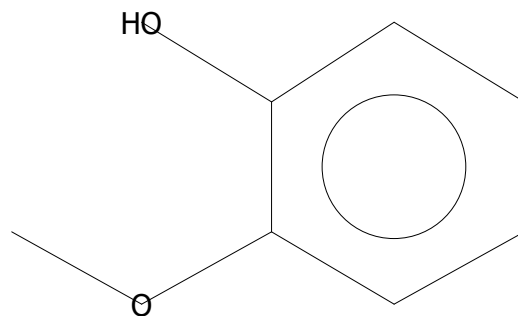

Peak Apex - sample "AerMBR A 092319 (20191119):1", peak 506, at 717.864 , 1.756 sec , sec (Spec # 36306 )

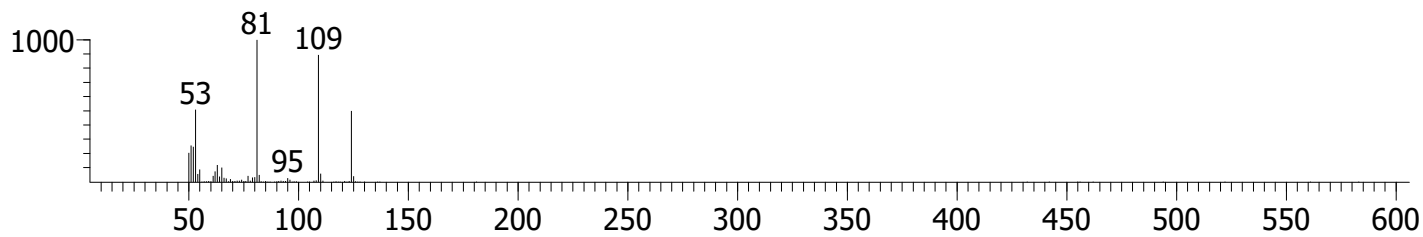

Peak True - sample "AerMBR A 092319 (20191119):1", peak 506, at 717.864 , 1.756 sec , sec (Spec # 36306)

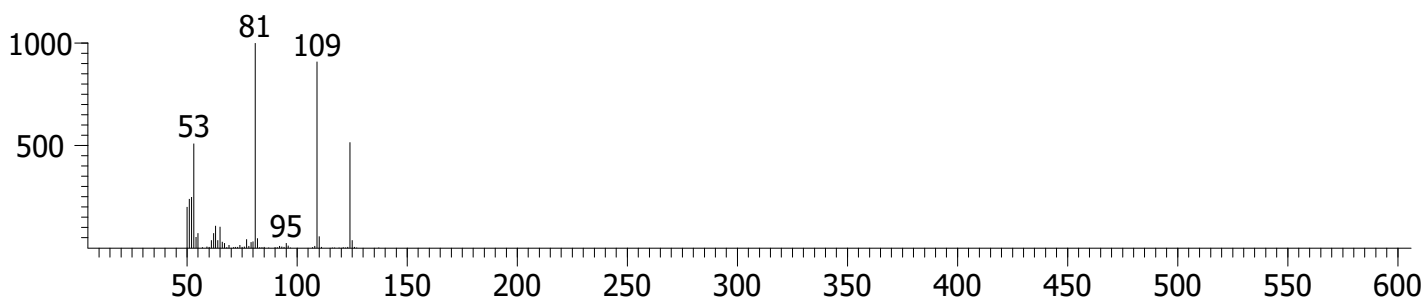

Library Hit - similarity 923, "Phenol, 2-methoxy-"

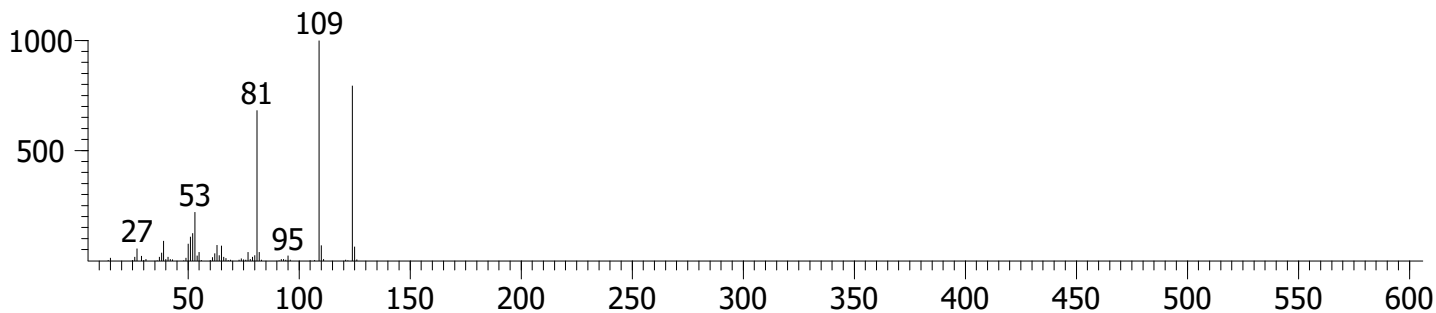

| Hit | Name                               | Similarity | Probability | CAS       | Library | Formula | Weight |
|-----|------------------------------------|------------|-------------|-----------|---------|---------|--------|
| 1   | Phenol, 2-methoxy-                 | 923        | 7518        | 90-05-1   | mainlib | C7H8O2  | 124    |
| 2   | Mequinol                           | 885        | 1801        | 150-76-5  | mainlib | C7H8O2  | 124    |
| 3   | Formic acid, 2-methoxyphenyl ester | 839        | 380         | 0-00-0    | mainlib | C8H8O3  | 152    |
| 4   | 2-Acetyl-5-methylfuran             | 790        | 78          | 1193-79-9 | mainlib | C7H8O2  | 124    |
| 5   | Ethanone, 1-(1-cyclohexen-1-yl)-   | 778        | 52          | 932-66-1  | mainlib | C8H12O  | 124    |



## Phenol, 2,3-dimethyl-

1st Dimension R.T. = 742.35  
2nd Dimension R.T. = 1.683  
Quant Mass(es) = 107  
S/N = 91.487  
Area = 9677.0  
Height = 1391.5  
Similarity = 781

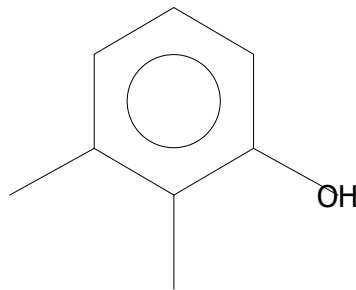

Peak Apex - sample "AerMBR A 092319 (20191119):1", peak 548, at 742.35 , 1.683 sec , sec (Spec # 40005)

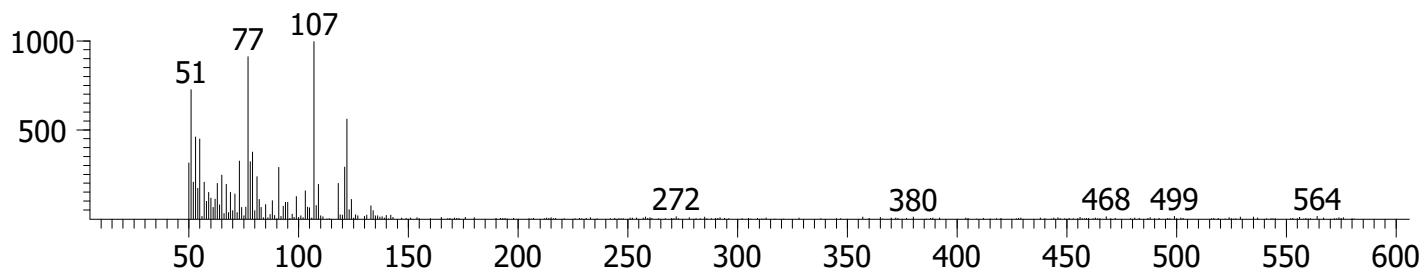

Peak True - sample "AerMBR A 092319 (20191119):1", peak 548, at 742.35 , 1.683 sec , sec (Spec # 40005)

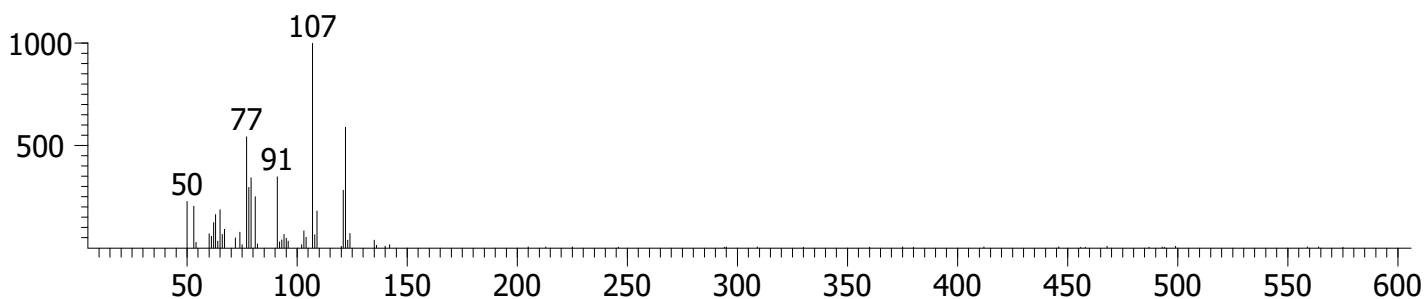

Library Hit - similarity 781, "Phenol, 2,3-dimethyl-"

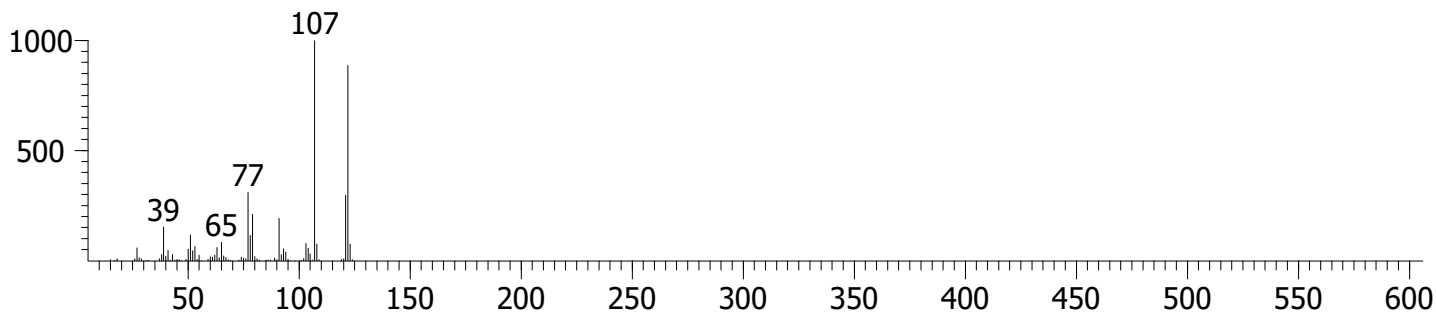

| Hit | Name                   | Similarity | Probability | CAS       | Library | Formula                          | Weight |
|-----|------------------------|------------|-------------|-----------|---------|----------------------------------|--------|
| 1   | Phenol, 2,3-dimethyl-  | 781        | 2426        | 526-75-0  | mainlib | C <sub>8</sub> H <sub>10</sub> O | 122    |
| 2   | Oxepine, 2,7-dimethyl- | 773        | 1809        | 1487-99-6 | mainlib | C <sub>8</sub> H <sub>10</sub> O | 122    |
| 3   | Phenol, 2,6-dimethyl-  | 766        | 1386        | 576-26-1  | mainlib | C <sub>8</sub> H <sub>10</sub> O | 122    |
| 4   | Phenol, 2,5-dimethyl-  | 754        | 923         | 95-87-4   | mainlib | C <sub>8</sub> H <sub>10</sub> O | 122    |
| 5   | Phenol, 2,4-dimethyl-  | 740        | 578         | 105-67-9  | mainlib | C <sub>8</sub> H <sub>10</sub> O | 122    |

# 1H-Pyrazole

## 4,5-dihydro-5,5-dimethyl-4-isopropylidene-

1st Dimension R.T. = 763.338

2nd Dimension R.T. = 1.643

Quant Mass(es) = 82

S/N = 303.28

Area = 65231

Height = 7425.3

Similarity = 907

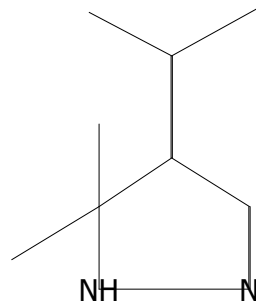

Peak Apex - sample "AerMBR A 092319 (20191119):1", peak 589, at 763.338 , 1.643 sec , sec (Spec # 43179 )

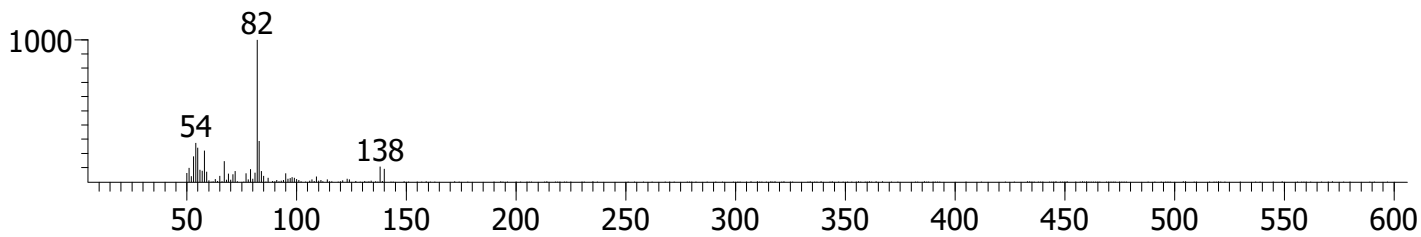

Peak True - sample "AerMBR A 092319 (20191119):1", peak 589, at 763.338 , 1.643 sec , sec (Spec # 43179)

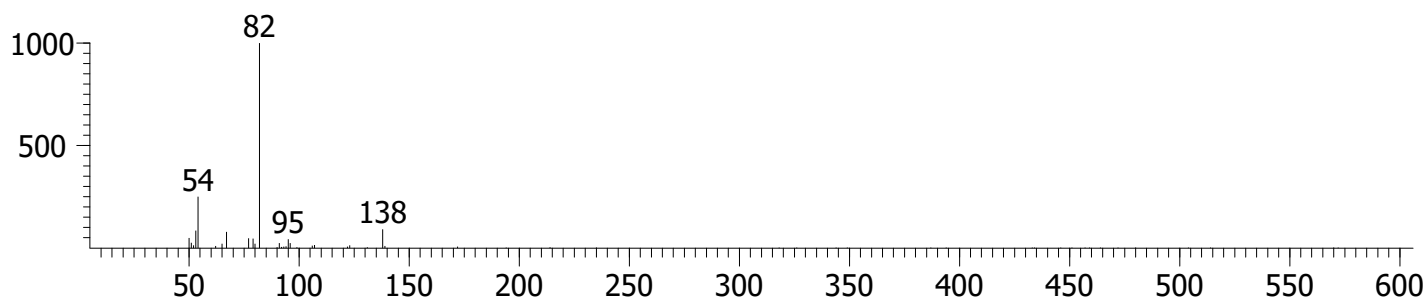

Library Hit - similarity 907, "1H-Pyrazole, 4,5-dihydro-5,5-dimethyl-4-isopropylidene-"

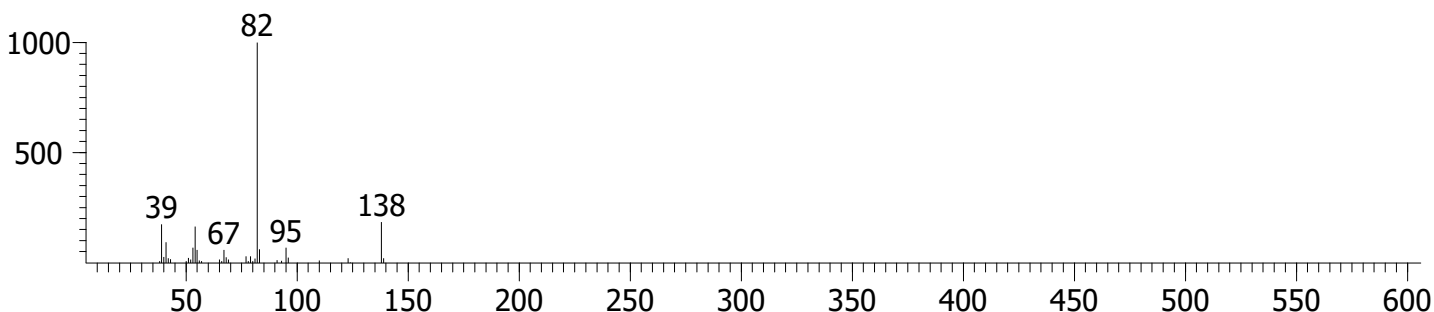

| Hit | Name                                                    | Similarity | Probability | CAS         | Library | Formula | Weight |
|-----|---------------------------------------------------------|------------|-------------|-------------|---------|---------|--------|
| 1   | 1H-Pyrazole, 4,5-dihydro-5,5-dimethyl-4-isopropylidene- | 907        | 6165        | 106251-09-6 | mainlib | C8H14N2 | 138    |
| 2   | Isophorone                                              | 890        | 3365        | 78-59-1     | mainlib | C9H14O  | 138    |
| 3   | 2-Cyclohexen-1-one, 3,5-dimethyl-                       | 757        | 132         | 1123-09-7   | mainlib | C8H12O  | 124    |
| 4   | 1,2,4,5-Tetrazine                                       | 749        | 98          | 290-96-0    | mainlib | C2H2N4  | 82     |
| 5   | 2-Cyclohexen-1-one, 3-methyl-                           | 742        | 75          | 1193-18-6   | mainlib | C7H10O  | 110    |

## Benzaldehyde, 4-chloro-

1st Dimension R.T. = 766.836

2nd Dimension R.T. = 1.808

Quant Mass(es) = 139

S/N = 1178.1

Area = 143822

Height = 19073

Similarity = 955

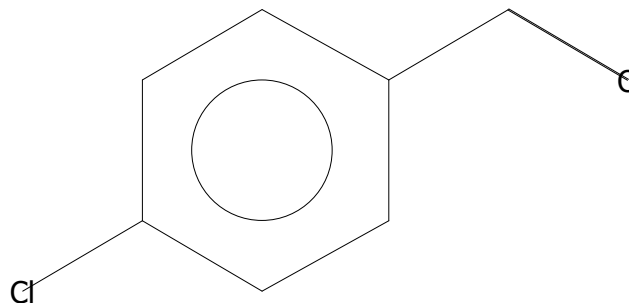

Peak Apex - sample "AerMBR A 092319 (20191119):1", peak 595, at 766.836 , 1.808 sec , sec (Spec # 43734 )

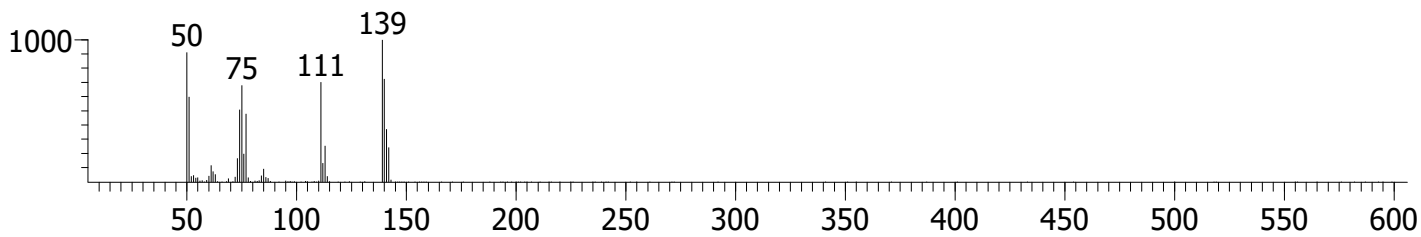

Peak True - sample "AerMBR A 092319 (20191119):1", peak 595, at 766.836 , 1.808 sec , sec (Spec # 43734)

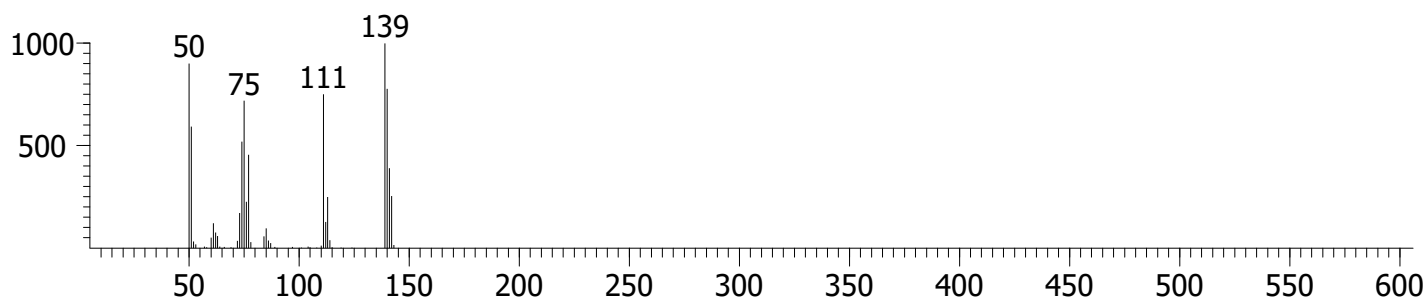

Library Hit - similarity 955, "Benzaldehyde, 4-chloro-"

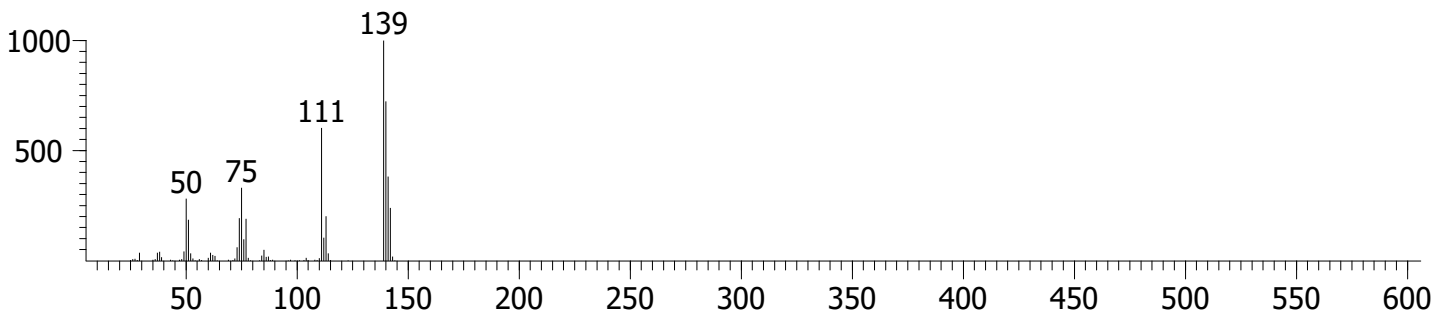

| Hit | Name                                      | Similarity | Probability | CAS      | Library | Formula    | Weight |
|-----|-------------------------------------------|------------|-------------|----------|---------|------------|--------|
| 1   | Benzaldehyde, 4-chloro-                   | 955        | 6283        | 104-88-1 | mainlib | C7H5ClO    | 140    |
| 2   | Benzaldehyde, 2-chloro-                   | 931        | 2105        | 89-98-5  | mainlib | C7H5ClO    | 140    |
| 3   | Benzaldehyde, 3-chloro-                   | 917        | 1318        | 587-04-2 | mainlib | C7H5ClO    | 140    |
| 4   | 1-Ethanone, 2-amino-1-(4-chlorophenyl)-   | 771        | 39          | 0-00-0   | mainlib | C8H8ClNO   | 169    |
| 5   | Benzoyl chloride, 2-(4-chlorobenzoyloxy)- | 762        | 28          | 0-00-0   | mainlib | C14H8Cl2O3 | 294    |

# Benzene, 1-isocyano-2-methyl-

1st Dimension R.T. = 787.824  
2nd Dimension R.T. = 2.033  
Quant Mass(es) = 90  
S/N = 62.511  
Area = 4945.1  
Height = 626.02  
Similarity = 860

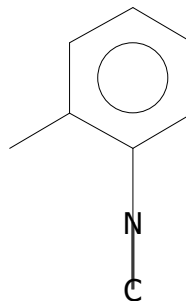

Peak Apex - sample "AerMBR A 092319 (20191119):1", peak 638, at 787.824 , 2.033 sec , sec (Spec # 46948 )

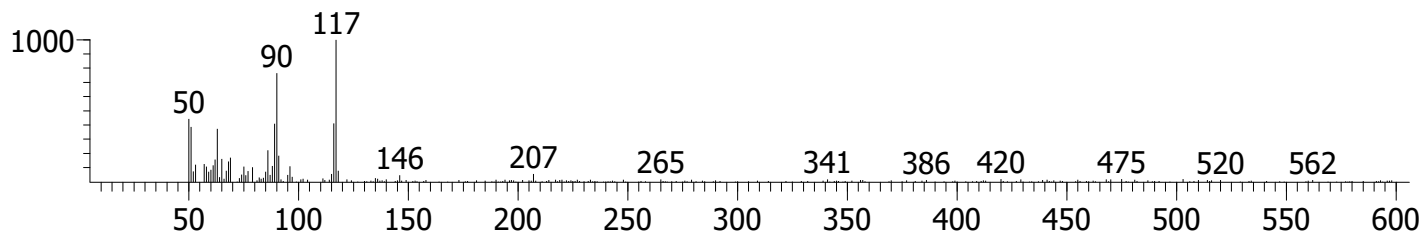

Peak True - sample "AerMBR A 092319 (20191119):1", peak 638, at 787.824 , 2.033 sec , sec (Spec # 46948)

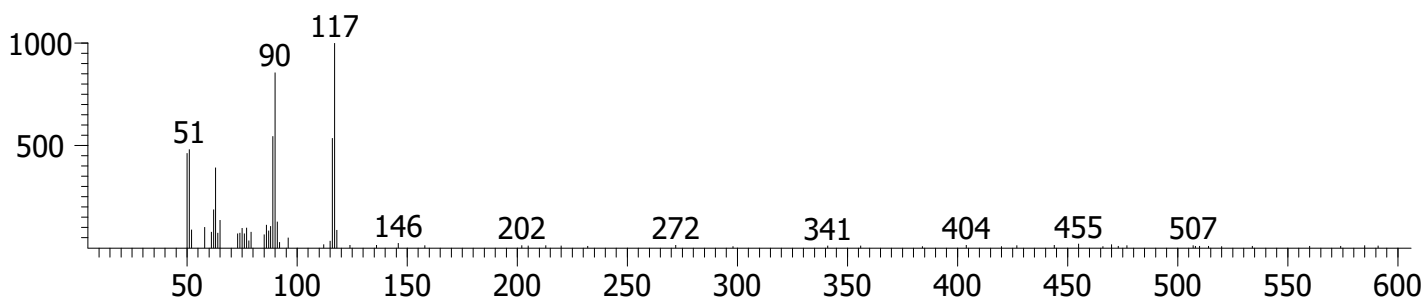

Library Hit - similarity 860, "Benzene, 1-isocyano-2-methyl-"

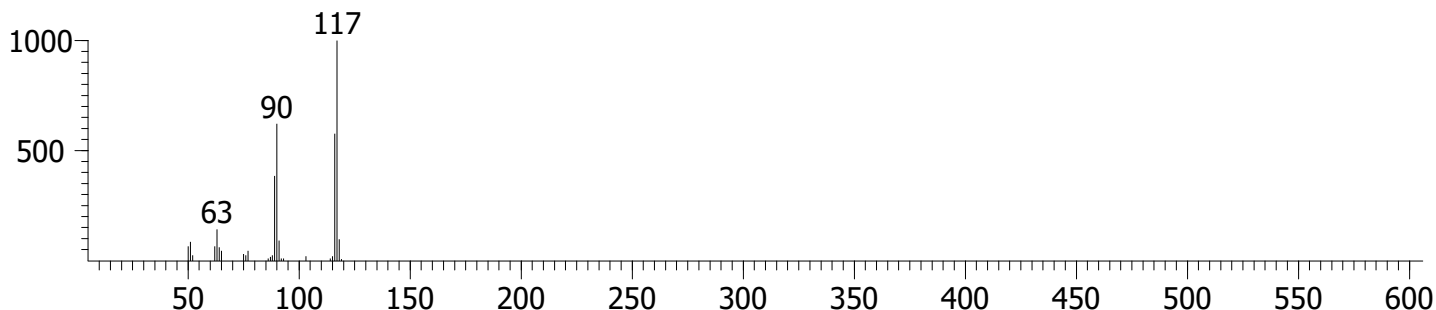

| Hit | Name                                     | Similarity | Probability | CAS        | Library | Formula | Weight |
|-----|------------------------------------------|------------|-------------|------------|---------|---------|--------|
| 1   | Benzene, 1-isocyano-2-methyl-            | 860        | 2226        | 10468-64-1 | mainlib | C8H7N   | 117    |
| 2   | Benzonitrile, 3-methyl-                  | 848        | 1482        | 620-22-4   | mainlib | C8H7N   | 117    |
| 3   | Benzenepropanoic acid, à-(hydroxyimino)- | 846        | 1367        | 3682-17-5  | mainlib | C9H9NO3 | 179    |
| 4   | Benzonitrile, 2-methyl-                  | 838        | 1020        | 529-19-1   | mainlib | C8H7N   | 117    |
| 5   | Benzyl nitrile                           | 837        | 980         | 140-29-4   | mainlib | C8H7N   | 117    |

# 1H-Indene, 2,3-dihydro-4-methyl-

1st Dimension R.T. = 791.322  
2nd Dimension R.T. = 1.571  
Quant Mass(es) = 117  
S/N = 548.67  
Area = 66856  
Height = 10215  
Similarity = 925

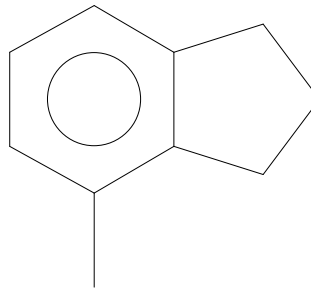

Peak Apex - sample "AerMBR A 092319 (20191119):1", peak 642, at 791.322 , 1.571 sec , sec (Spec # 47408 )

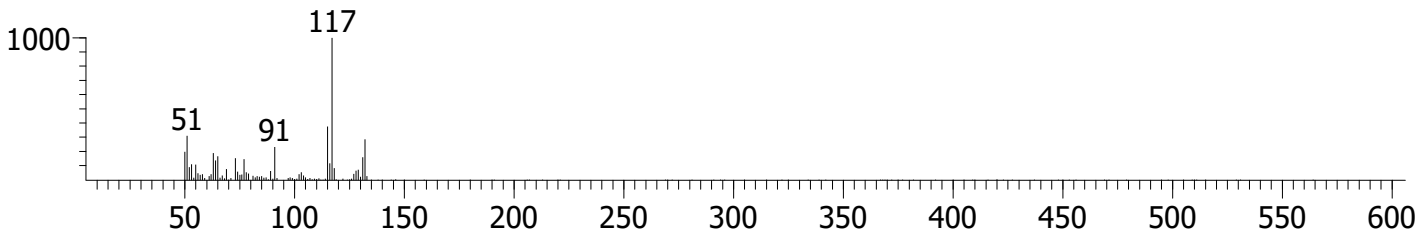

Peak True - sample "AerMBR A 092319 (20191119):1", peak 642, at 791.322 , 1.571 sec , sec (Spec # 47408)

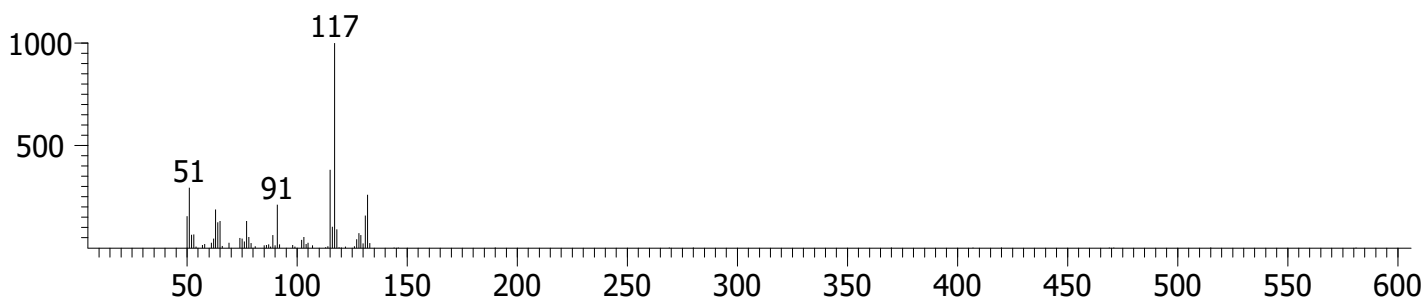

Library Hit - similarity 925, "1H-Indene, 2,3-dihydro-4-methyl-"

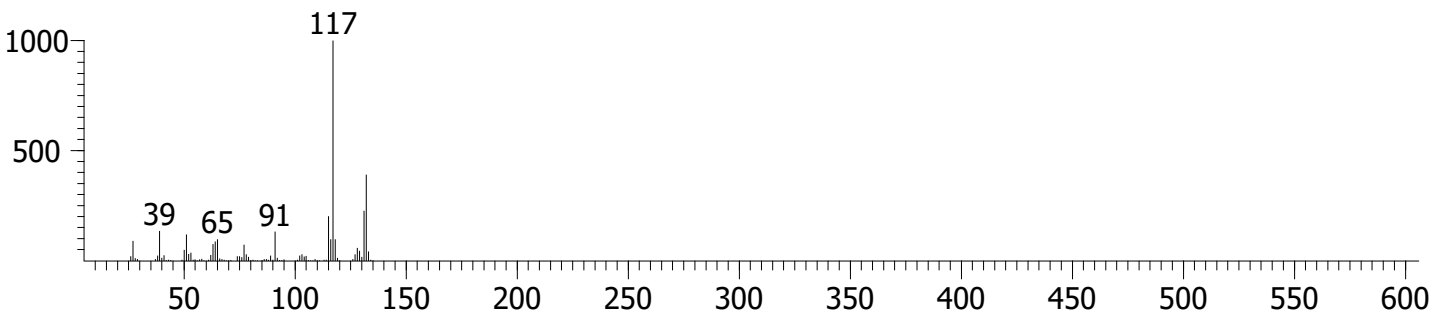

| Hit | Name                             | Similarity | Probability | CAS       | Library | Formula | Weight |
|-----|----------------------------------|------------|-------------|-----------|---------|---------|--------|
| 1   | 1H-Indene, 2,3-dihydro-4-methyl- | 925        | 2024        | 824-22-6  | mainlib | C10H12  | 132    |
| 2   | 1H-Indene, 2,3-dihydro-5-methyl- | 919        | 1590        | 874-35-1  | mainlib | C10H12  | 132    |
| 3   | (E)-1-Phenyl-1-butene            | 914        | 1282        | 1005-64-7 | mainlib | C10H12  | 132    |
| 4   | Indan, 1-methyl-                 | 897        | 699         | 767-58-8  | mainlib | C10H12  | 132    |
| 5   | Benzene, 1-ethenyl-3-ethyl-      | 891        | 550         | 7525-62-4 | mainlib | C10H12  | 132    |

## 2,6,6-Trimethyl-2-cyclohexene-1,4-dione

1st Dimension R.T. = 791.322  
2nd Dimension R.T. = 1.762  
Quant Mass(es) = 68  
S/N = 2163.9  
Area = 707342  
Height = 85765  
Similarity = 901

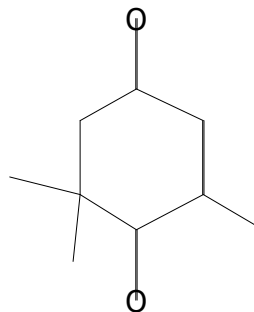

Peak Apex - sample "AerMBR A 092319 (20191119):1", peak 646, at 791.322 , 1.762 sec , sec (Spec # 47437 )

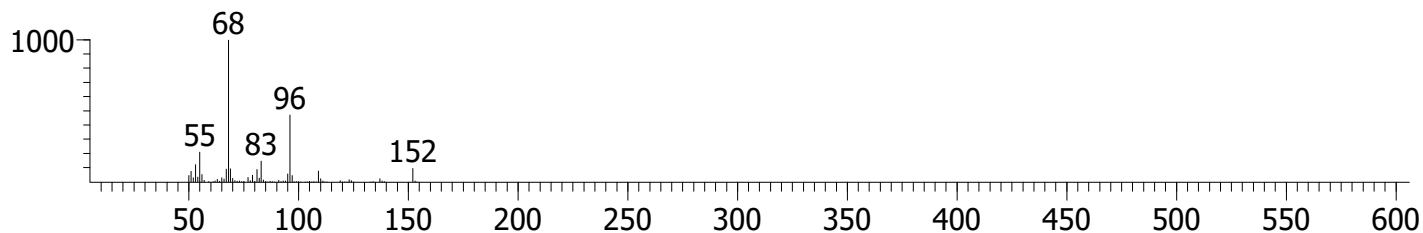

Peak True - sample "AerMBR A 092319 (20191119):1", peak 646, at 791.322 , 1.762 sec , sec (Spec # 47437)

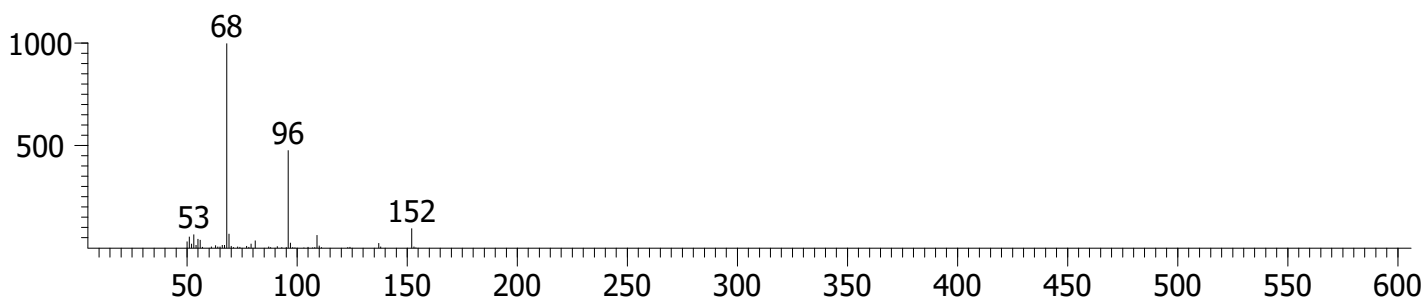

Library Hit - similarity 901, "2,6,6-Trimethyl-2-cyclohexene-1,4-dione"

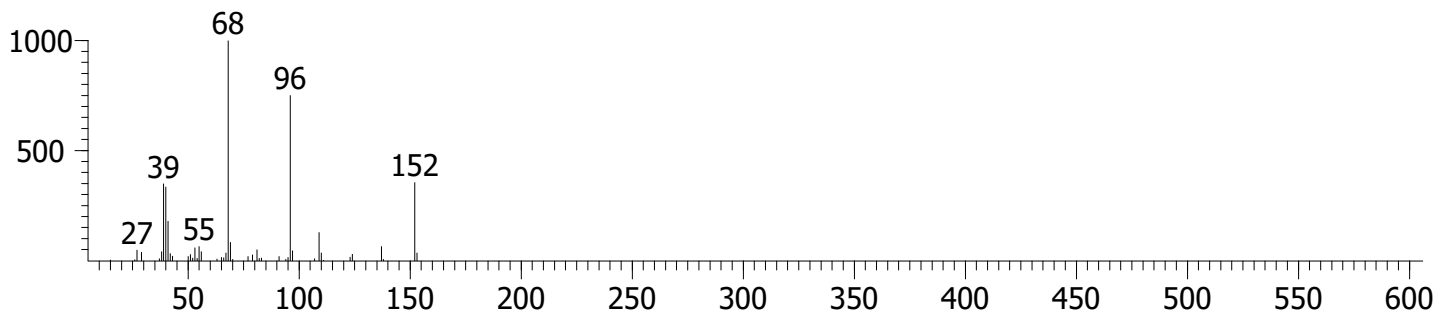

| Hit | Name                                                | Similarity | Probability | CAS        | Library | Formula | Weight |
|-----|-----------------------------------------------------|------------|-------------|------------|---------|---------|--------|
| 1   | 2,6,6-Trimethyl-2-cyclohexene-1,4-dione             | 901        | 8186        | 1125-21-9  | mainlib | C9H12O2 | 152    |
| 2   | 2-Cyclohexen-1-one                                  | 843        | 1507        | 930-68-7   | mainlib | C6H8O   | 96     |
| 3   | But-1-ene-3-yne, 1-ethoxy-                          | 752        | 127         | 2806-41-9  | mainlib | C6H8O   | 96     |
| 4   | 4(1H)-Pyrimidinone                                  | 735        | 69          | 4562-27-0  | mainlib | C4H4N2O | 96     |
| 5   | 1-Cyclohexene-1-carboxaldehyde, 5,5-dimethyl-3-oxo- | 734        | 66          | 56621-35-3 | mainlib | C9H12O2 | 152    |

## 5H-5-Methyl-6,7-dihydrocyclopentapyrazine

1st Dimension R.T. = 791.322  
2nd Dimension R.T. = 1.802  
Quant Mass(es) = 119  
S/N = 248.37  
Area = 28668  
Height = 3592.2  
Similarity = 788

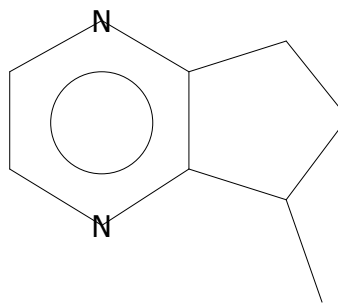

Peak Apex - sample "AerMBR A 092319 (20191119):1", peak 647, at 791.322 , 1.802 sec , sec (Spec # 47443 )

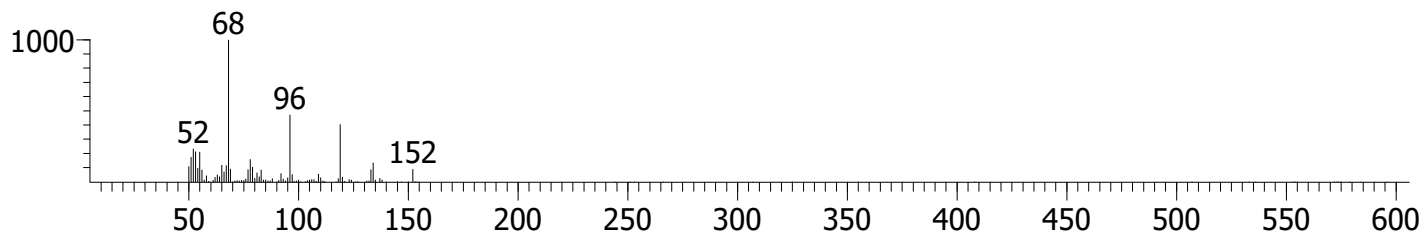

Peak True - sample "AerMBR A 092319 (20191119):1", peak 647, at 791.322 , 1.802 sec , sec (Spec # 47443)

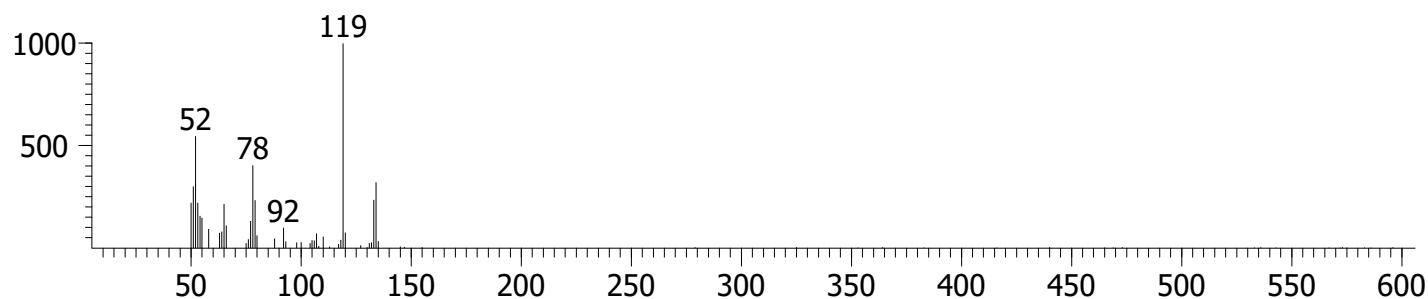

Library Hit - similarity 788, "5H-5-Methyl-6,7-dihydrocyclopentapyrazine"

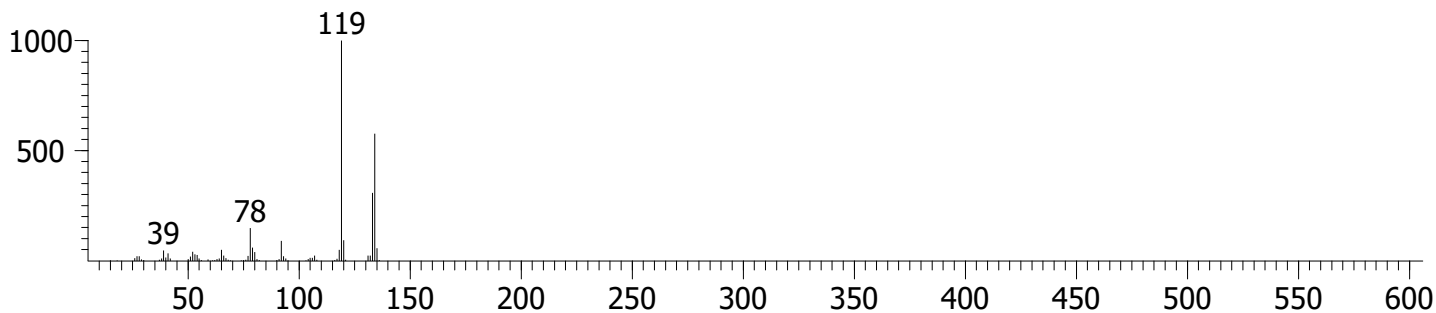

| Hit | Name                                                       | Similarity | Probability | CAS        | Library | Formula   | Weight |
|-----|------------------------------------------------------------|------------|-------------|------------|---------|-----------|--------|
| 1   | 5H-5-Methyl-6,7-dihydrocyclopentapyrazine                  | 788        | 3829        | 23747-48-0 | mainlib | C8H10N2   | 134    |
| 2   | Pyridine, 2-(4-methyl-5-trans-phenyl-1,3-oxazolidin-2-yl)- | 774        | 2397        | 0-00-0     | mainlib | C15H16N2O | 240    |
| 3   | Pyrazine, 2-methyl-3-(1-propenyl)-, (Z)-                   | 755        | 1164        | 55138-65-3 | mainlib | C8H10N2   | 134    |
| 4   | Pyridine, 2-(4-methyl-5-cis-phenyl-1,3-oxazolidin-2-yl)-   | 742        | 752         | 0-00-0     | mainlib | C15H16N2O | 240    |
| 5   | Propanedinitrile, (1,2-dimethylpropylidene)-               | 735        | 576         | 13017-52-2 | mainlib | C8H10N2   | 134    |

4H-Pyran-4-one,  
2,3-dihydro-3,5-dihydroxy-6-methyl-

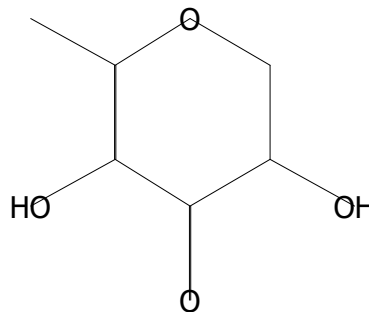

1st Dimension R.T. = 798.318  
2nd Dimension R.T. = 1.822  
Quant Mass(es) = 144  
S/N = 100.83  
Area = 10179  
Height = 1302.5  
Similarity = 777

Peak Apex - sample "AerMBR A 092319 (20191119):1", peak 663, at 798.318 , 1.822 sec , sec (Spec # 48506 )

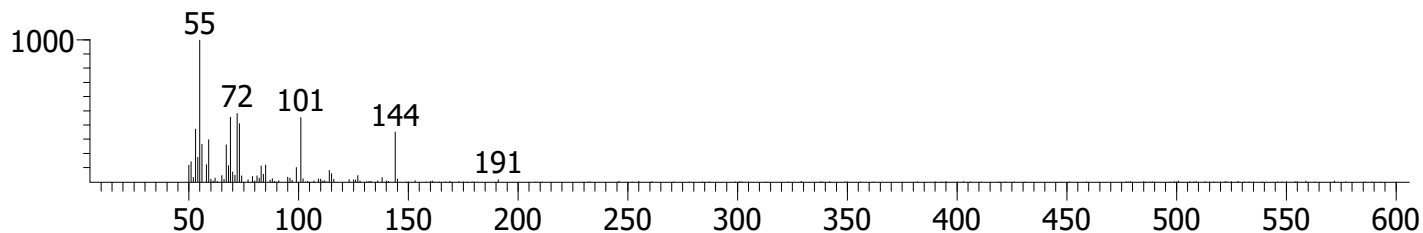

Peak True - sample "AerMBR A 092319 (20191119):1", peak 663, at 798.318 , 1.822 sec , sec (Spec # 48506)

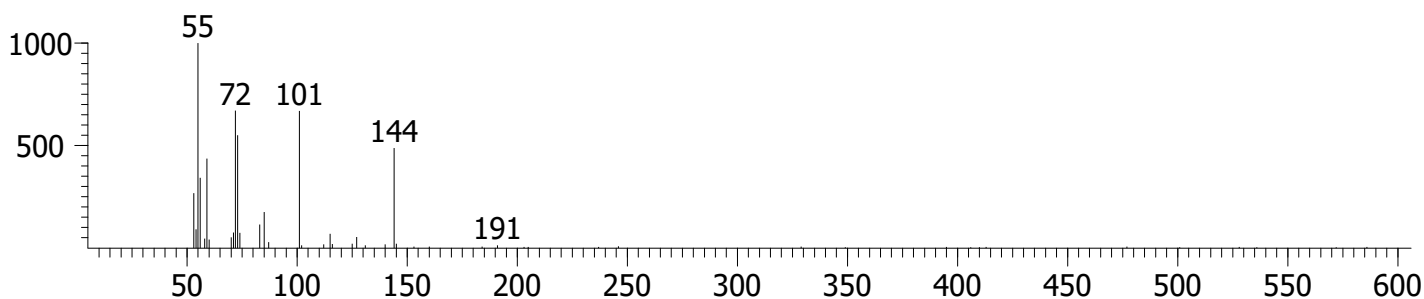

Library Hit - similarity 777, "4H-Pyran-4-one, 2,3-dihydro-3,5-dihydroxy-6-methyl-"

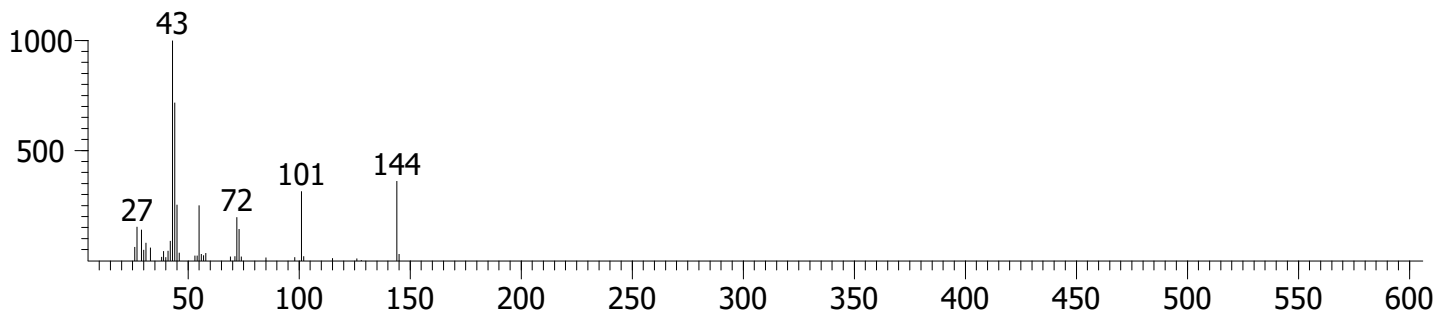

| Hit | Name                                                | Similarity | Probability | CAS         | Library | Formula                                       | Weight |
|-----|-----------------------------------------------------|------------|-------------|-------------|---------|-----------------------------------------------|--------|
| 1   | 4H-Pyran-4-one, 2,3-dihydro-3,5-dihydroxy-6-methyl- | 777        | 8420        | 28564-83-2  | mainlib | C <sub>6</sub> H <sub>8</sub> O <sub>4</sub>  | 144    |
| 2   | 2,4-Dihydroxy-2,5-dimethyl-3(2H)-furan-3-one        | 596        | 148         | 10230-62-3  | mainlib | C <sub>6</sub> H <sub>8</sub> O <sub>4</sub>  | 144    |
| 3   | cis-3-Methyl-2-n-propylthiophane                    | 592        | 125         | 118068-76-1 | mainlib | C <sub>8</sub> H <sub>16</sub> S              | 144    |
| 4   | trans-3-Methyl-2-n-propylthiophane                  | 588        | 105         | 118068-75-0 | mainlib | C <sub>8</sub> H <sub>16</sub> S              | 144    |
| 5   | 1,3-Dioxane, 2,4-dimethyl-                          | 587        | 101         | 766-20-1    | mainlib | C <sub>6</sub> H <sub>12</sub> O <sub>2</sub> | 116    |



Bicyclo[2.2.1]heptan-2-one, 1,7,7-trimethyl-, (1S)-

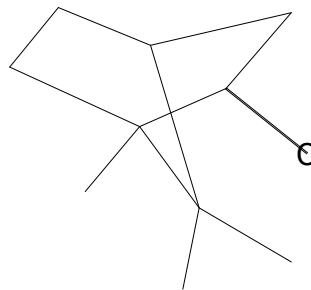

1st Dimension R.T. = 801.816

2nd Dimension R.T. = 1.630

Quant Mass(es) = 95

S/N = 163.91

Area = 31212

Height = 3115.2

Similarity = 882

Peak Apex - sample "AerMBR A 092319 (20191119):1", peak 668, at 801.816 , 1.630 sec , sec (Spec # 49007 )

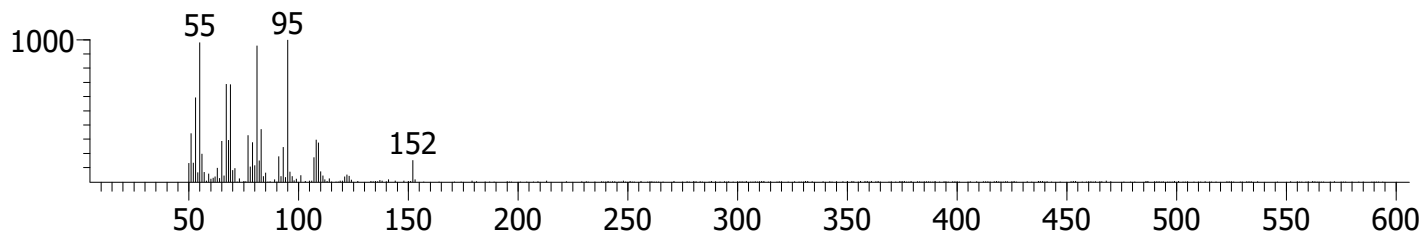

Peak True - sample "AerMBR A 092319 (20191119):1", peak 668, at 801.816 , 1.630 sec , sec (Spec # 49007)

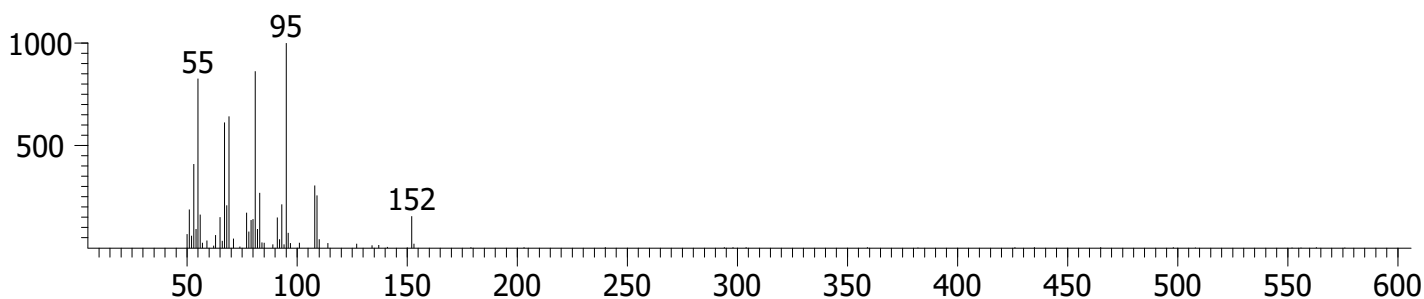

Library Hit - similarity 882, "Bicyclo[2.2.1]heptan-2-one, 1,7,7-trimethyl-, (1S)-"

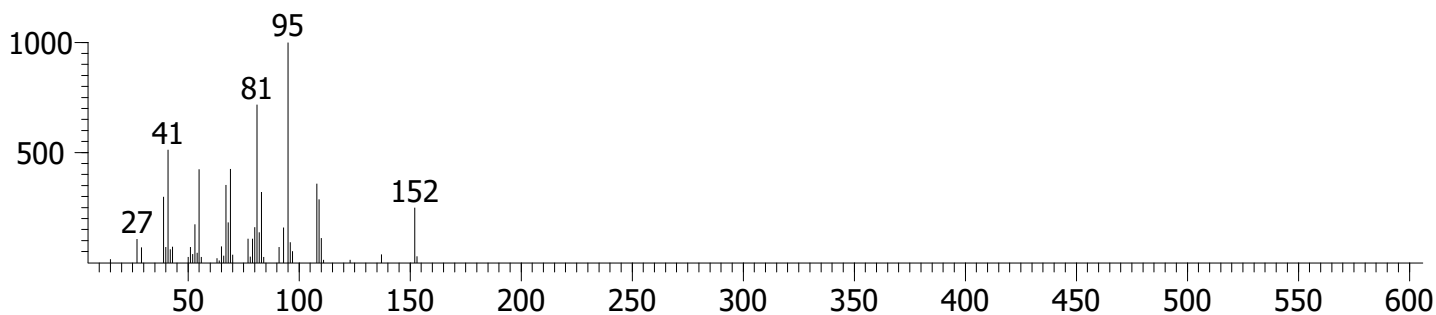

| Hit | Name                                                                                       | Similarity | Probability | CAS        | Library | Formula  | Weight |
|-----|--------------------------------------------------------------------------------------------|------------|-------------|------------|---------|----------|--------|
| 1   | Bicyclo[2.2.1]heptan-2-one, 1,7,7-trimethyl-, (1S)-                                        | 882        | 6647        | 464-48-2   | mainlib | C10H16O  | 152    |
| 2   | Camphor                                                                                    | 852        | 1847        | 76-22-2    | mainlib | C10H16O  | 152    |
| 3   | (+)-2-Bornanone                                                                            | 818        | 473         | 464-49-3   | mainlib | C10H16O  | 152    |
| 4   | Spirobicyclo[2.2.1]heptane-2,2'-(1',3'-dioxo-2'-oxocyclohex-5'-ene), 1,6',7,7-tetramethyl- | 803        | 287         | 0-00-0     | mainlib | C14H20O3 | 236    |
| 5   | 4-Methyl-1,4-heptadiene                                                                    | 784        | 139         | 13857-55-1 | mainlib | C8H14    | 110    |

# Benzene, 1-butynyl-

1st Dimension R.T. = 812.31  
2nd Dimension R.T. = 1.650  
Quant Mass(es) = 92  
S/N = 1423.1  
Area = 75526  
Height = 9957.2  
Similarity = 861

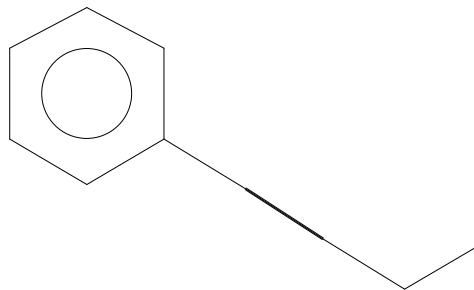

Peak Apex - sample "AerMBR A 092319 (20191119):1", peak 694, at 812.31 , 1.650 sec , sec (Spec # 50600)

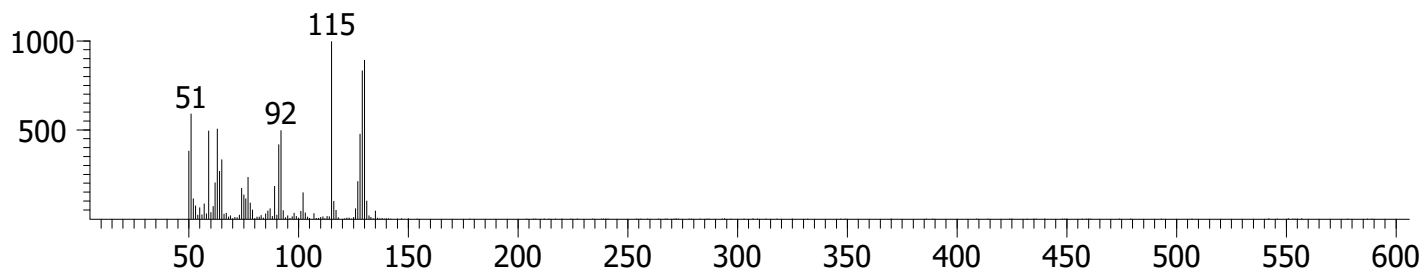

Peak True - sample "AerMBR A 092319 (20191119):1", peak 694, at 812.31 , 1.650 sec , sec (Spec # 50600)

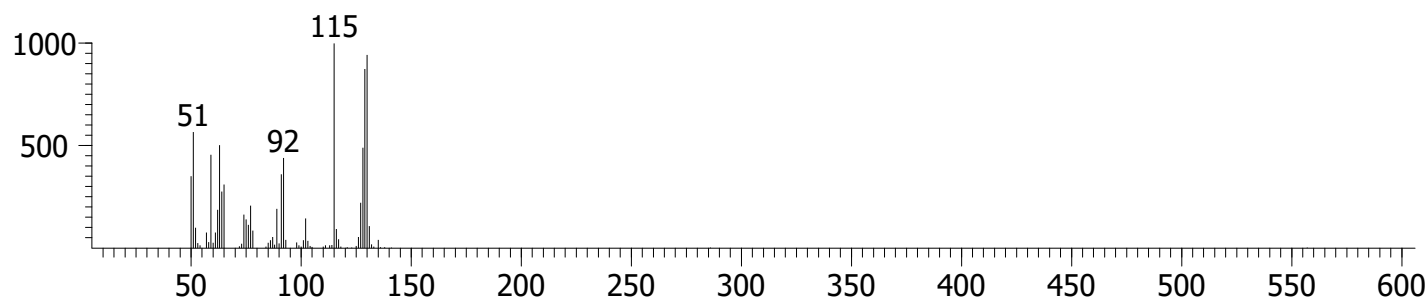

Library Hit - similarity 861, "Benzene, 1-butynyl-"

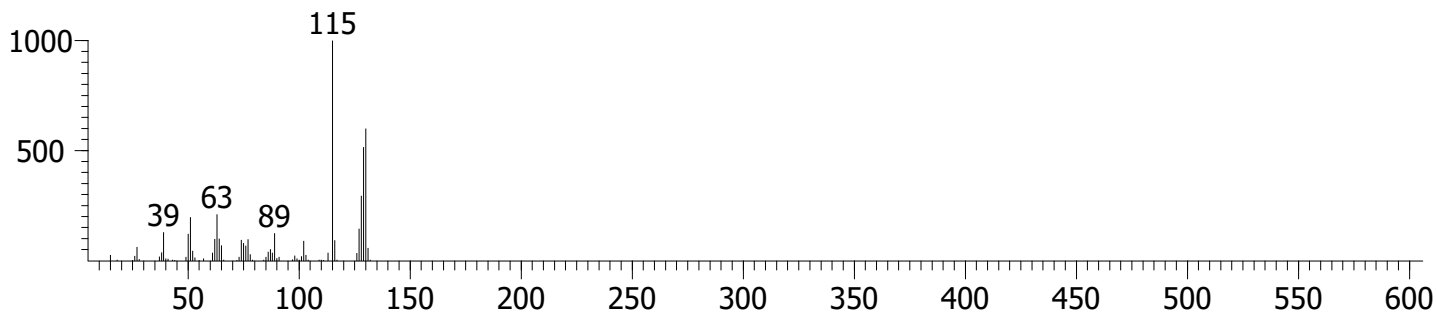

| Hit | Name                               | Similarity | Probability | CAS       | Library | Formula | Weight |
|-----|------------------------------------|------------|-------------|-----------|---------|---------|--------|
| 1   | Benzene, 1-butynyl-                | 861        | 1761        | 622-76-4  | mainlib | C10H10  | 130    |
| 2   | 1H-Indene, 3-methyl-               | 849        | 1172        | 767-60-2  | mainlib | C10H10  | 130    |
| 3   | 2-Methylindene                     | 846        | 1036        | 2177-47-1 | mainlib | C10H10  | 130    |
| 4   | Benzene, 1,3-butadienyl-           | 841        | 835         | 1515-78-2 | mainlib | C10H10  | 130    |
| 5   | Benzene, (1-methylene-2-propenyl)- | 840        | 802         | 2288-18-8 | mainlib | C10H10  | 130    |

# 1,4-Cyclohexanedione, 2,2,6-trimethyl-

1st Dimension R.T. = 826.302  
2nd Dimension R.T. = 1.855  
Quant Mass(es) = 139  
S/N = 229.00  
Area = 23789  
Height = 2824.7  
Similarity = 721

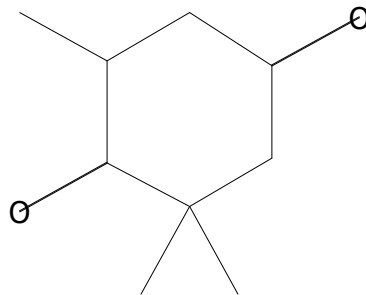

Peak Apex - sample "AerMBR A 092319 (20191119):1", peak 736, at 826.302 , 1.855 sec , sec (Spec # 52751 )

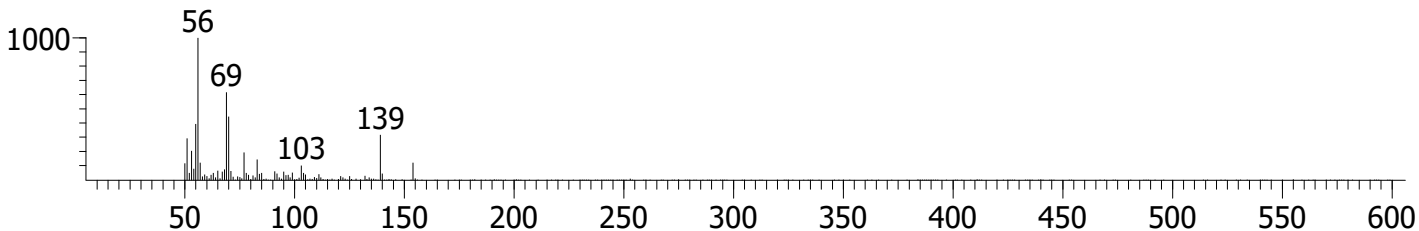

Peak True - sample "AerMBR A 092319 (20191119):1", peak 736, at 826.302 , 1.855 sec , sec (Spec # 52751)

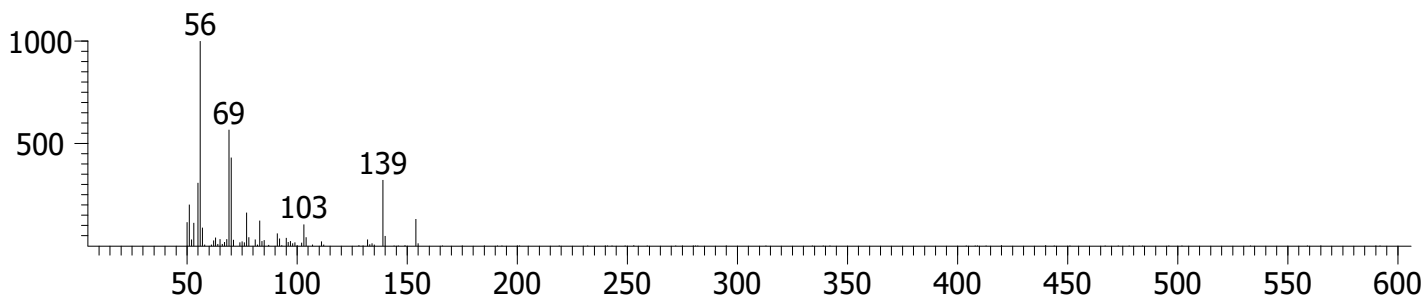

Library Hit - similarity 721, "1,4-Cyclohexanedione, 2,2,6-trimethyl-"

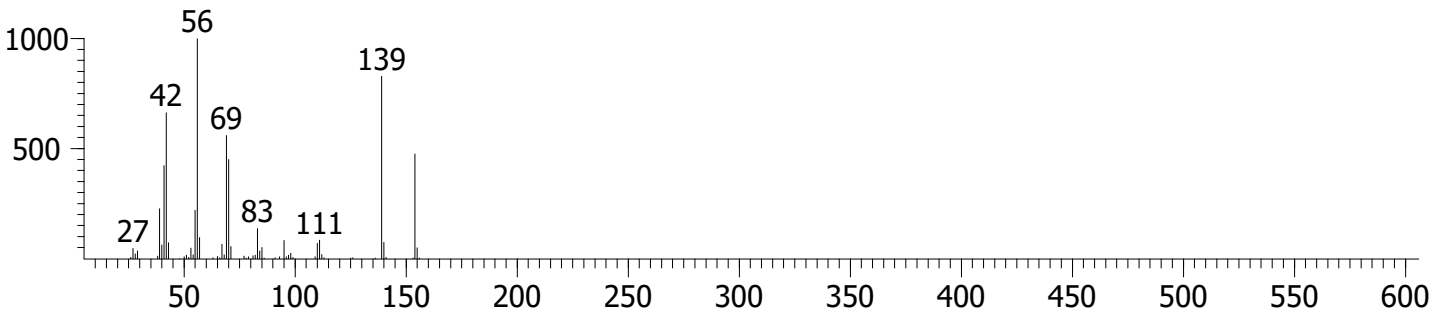

| Hit | Name                                       | Similarity | Probability | CAS        | Library | Formula   | Weight |
|-----|--------------------------------------------|------------|-------------|------------|---------|-----------|--------|
| 1   | 1,4-Cyclohexanedione, 2,2,6-trimethyl-     | 721        | 4134        | 20547-99-3 | mainlib | C9H14O2   | 154    |
| 2   | 2-Methyl-2-hexyl methylphosphonofluoridate | 663        | 761         | 0-00-0     | mainlib | C8H18FO2P | 196    |
| 3   | 1-Propene, 1-(2-propenyloxy)-, (E)-        | 656        | 583         | 61142-13-0 | mainlib | C6H10O    | 98     |
| 4   | Cyclohexane, 1,1-dimethyl-2-propyl-        | 636        | 265         | 81983-71-3 | mainlib | C11H22    | 154    |
| 5   | 1,4-Dioxaspiro[2.4]heptan-5-one, 6-methyl- | 635        | 255         | 0-00-0     | mainlib | C6H8O3    | 128    |

# Cycloprop[a]indene, 1,1a,6,6a-tetrahydro-

1st Dimension R.T. = 829.8  
2nd Dimension R.T. = 1.742  
Quant Mass(es) = 130  
S/N = 4121.4  
Area = 302317  
Height = 43119  
Similarity = 934

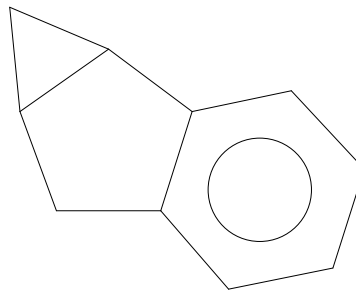

Peak Apex - sample "AerMBR A 092319 (20191119):1", peak 744, at 829.8 , 1.742 sec , sec (Spec # 53264)

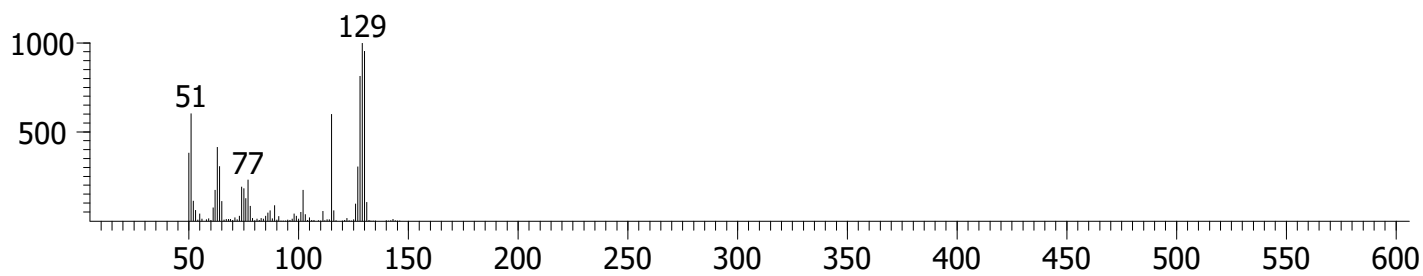

Peak True - sample "AerMBR A 092319 (20191119):1", peak 744, at 829.8 , 1.742 sec , sec (Spec # 53264)

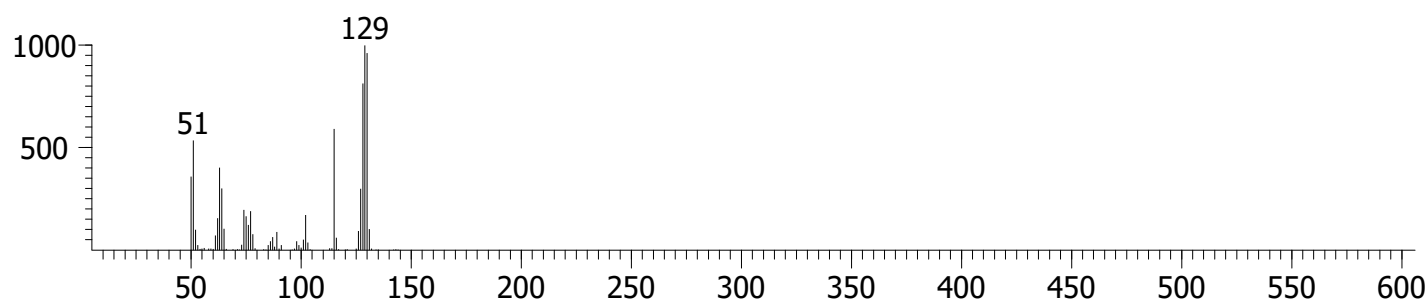

Library Hit - similarity 934, "Cycloprop[a]indene, 1,1a,6,6a-tetrahydro-"

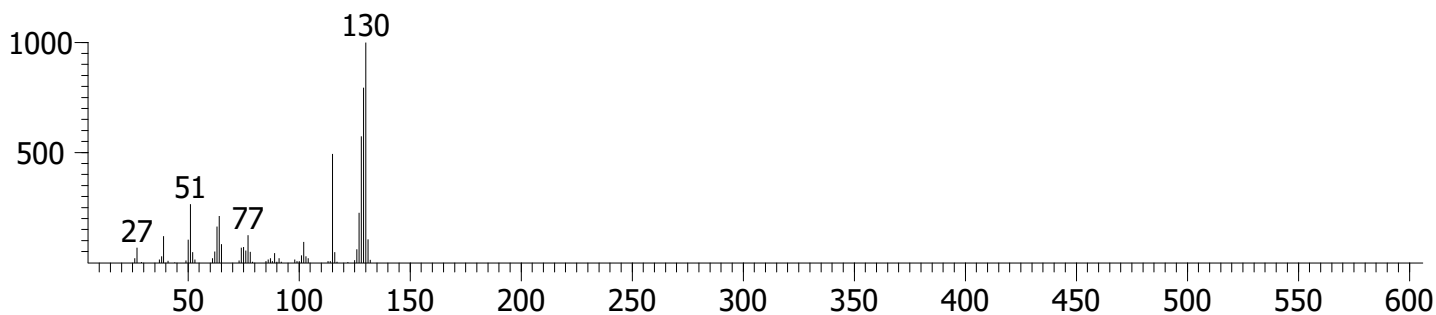

| Hit | Name                                             | Similarity | Probability | CAS        | Library | Formula | Weight |
|-----|--------------------------------------------------|------------|-------------|------------|---------|---------|--------|
| 1   | Cycloprop[a]indene, 1,1a,6,6a-tetrahydro-        | 934        | 4121        | 15677-15-3 | mainlib | C10H10  | 130    |
| 2   | 1,4-Dihydronaphthalene                           | 915        | 2001        | 612-17-9   | mainlib | C10H10  | 130    |
| 3   | 1H-Indene, 3-methyl-                             | 884        | 545         | 767-60-2   | mainlib | C10H10  | 130    |
| 4   | 1,4-Methanonaphthalen-9-one, 1,2,3,4-tetrahydro- | 881        | 482         | 6165-88-4  | mainlib | C11H10O | 158    |
| 5   | Benzene, 1-butynyl-                              | 880        | 463         | 622-76-4   | mainlib | C10H10  | 130    |

## 2,6-Xylidine

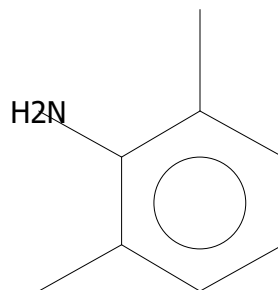

1st Dimension R.T. = 829.8  
2nd Dimension R.T. = 1.868  
Quant Mass(es) = 106  
S/N = 161.29  
Area = 15424  
Height = 1825.1  
Similarity = 908

Peak Apex - sample "AerMBR A 092319 (20191119):1", peak 747, at 829.8 , 1.868 sec , sec (Spec # 53283)

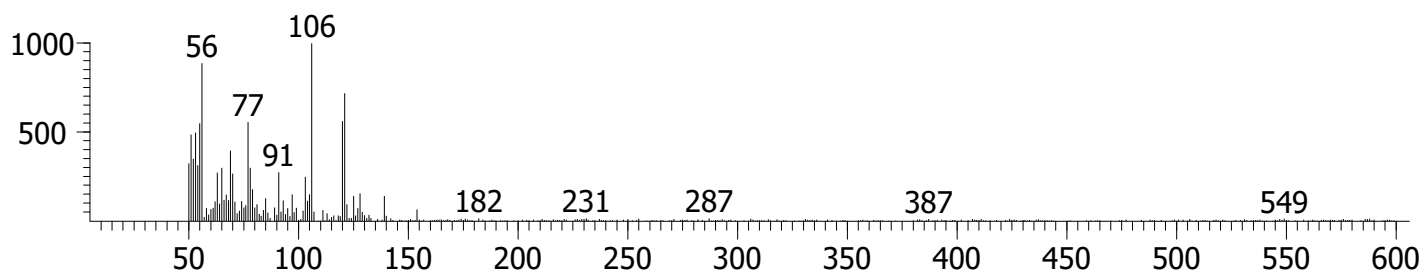

Peak True - sample "AerMBR A 092319 (20191119):1", peak 747, at 829.8 , 1.868 sec , sec (Spec # 53283)

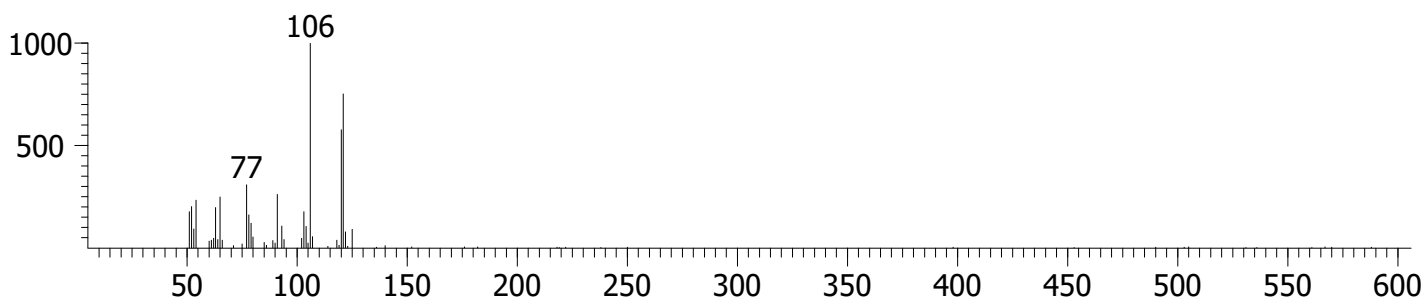

Library Hit - similarity 908, "2,6-Xylidine"

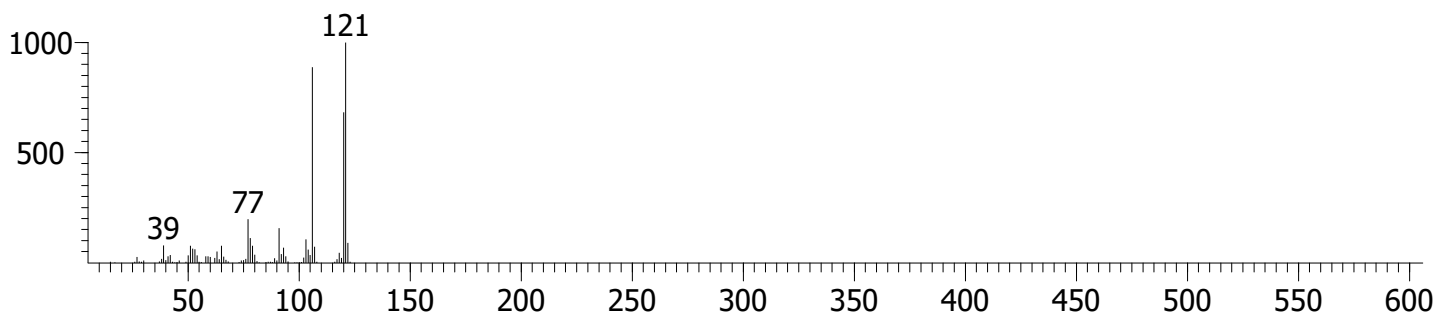

| Hit | Name                                    | Similarity | Probability | CAS         | Library | Formula     | Weight |
|-----|-----------------------------------------|------------|-------------|-------------|---------|-------------|--------|
| 1   | 2,6-Xylidine                            | 908        | 4288        | 87-62-7     | mainlib | C8H11N      | 121    |
| 2   | Benzenamine, 2,3-dimethyl-              | 897        | 2941        | 87-59-2     | mainlib | C8H11N      | 121    |
| 3   | Benzenamine, 2,5-dimethyl-              | 872        | 897         | 95-78-3     | mainlib | C8H11N      | 121    |
| 4   | 4-Nitro-N-(2,6-xylyl)benzenesulfonamide | 857        | 543         | 109508-84-1 | mainlib | C14H14N2O4S | 306    |
| 5   | Benzenamine, 3,4-dimethyl-              | 851        | 427         | 95-64-7     | mainlib | C8H11N      | 121    |

# Benzaldehyde, 4-ethyl-

1st Dimension R.T. = 847.29  
2nd Dimension R.T. = 1.729  
Quant Mass(es) = 134  
S/N = 495.33  
Area = 59628  
Height = 8005.7  
Similarity = 893

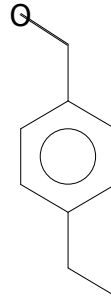

Peak Apex - sample "AerMBR A 092319 (20191119):1", peak 770, at 847.29 , 1.729 sec , sec (Spec # 55912)

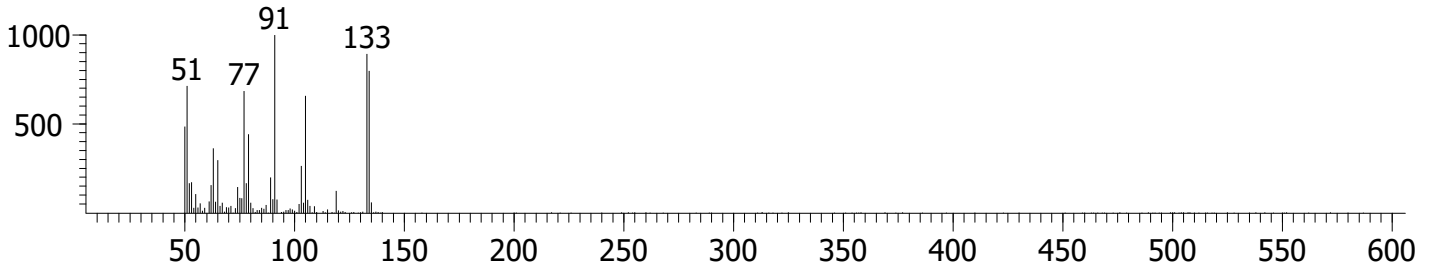

Peak True - sample "AerMBR A 092319 (20191119):1", peak 770, at 847.29 , 1.729 sec , sec (Spec # 55912)

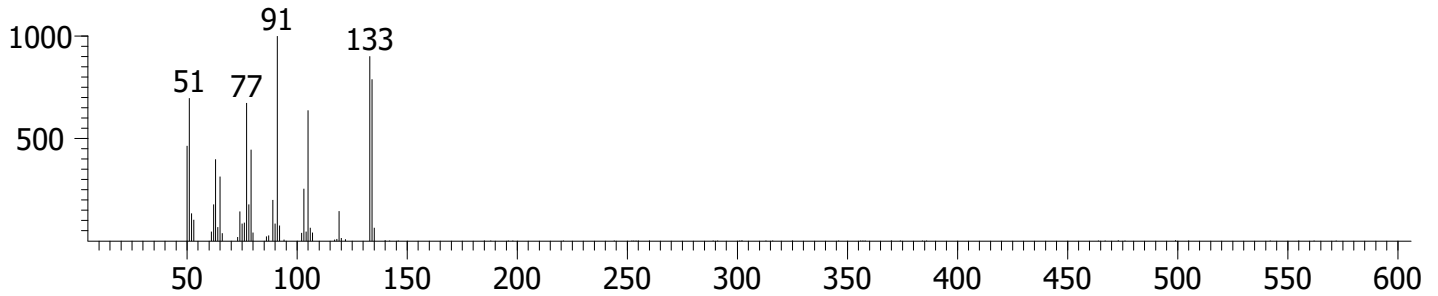

Library Hit - similarity 893, "Benzaldehyde, 4-ethyl-"

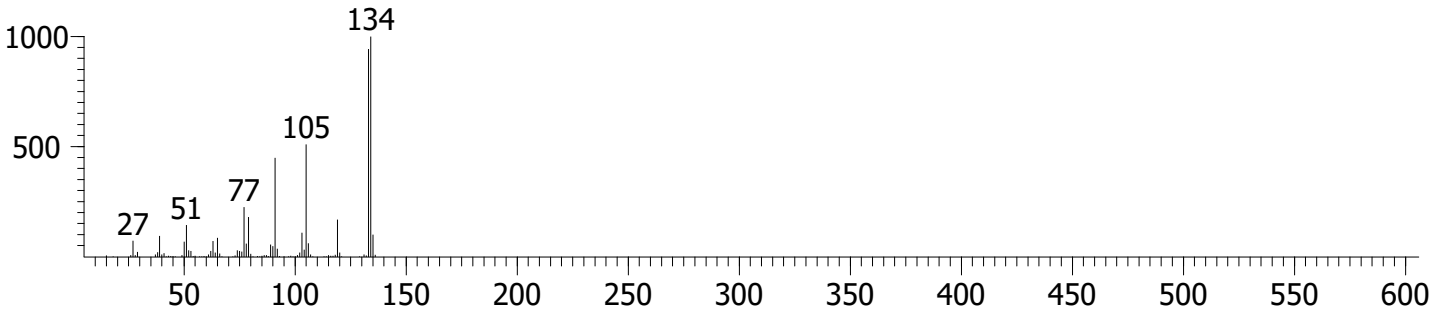

| Hit | Name                        | Similarity | Probability | CAS          | Library | Formula  | Weight |
|-----|-----------------------------|------------|-------------|--------------|---------|----------|--------|
| 1   | Benzaldehyde, 4-ethyl-      | 893        | 4838        | 4748-78-1    | mainlib | C9H10O   | 134    |
| 2   | 2,6-Dimethylbenzaldehyde    | 829        | 794         | 1123-56-4    | mainlib | C9H10O   | 134    |
| 3   | Benzaldehyde, 3,5-dimethyl- | 829        | 794         | 5779-95-3    | mainlib | C9H10O   | 134    |
| 4   | 6-APDB                      | 816        | 513         | 1281872-58-9 | mainlib | C11H15NO | 177    |
| 5   | Benzaldehyde, 3,4-dimethyl- | 815        | 493         | 5973-71-7    | mainlib | C9H10O   | 134    |

# 1H-Pyrrole, 1-(2-furanylmethyl)-

1st Dimension R.T. = 847.29  
2nd Dimension R.T. = 1.841  
Quant Mass(es) = 81  
S/N = 163.80  
Area = 31421  
Height = 3997.0  
Similarity = 863

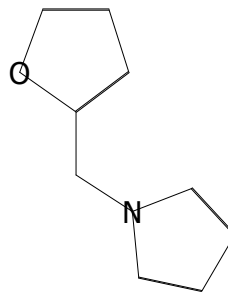

Peak Apex - sample "AerMBR A 092319 (20191119):1", peak 771, at 847.29 , 1.841 sec , sec (Spec # 55929)

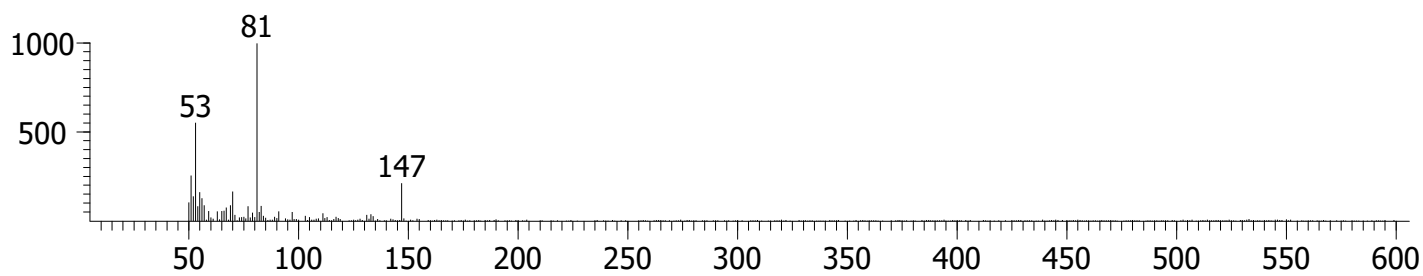

Peak True - sample "AerMBR A 092319 (20191119):1", peak 771, at 847.29 , 1.841 sec , sec (Spec # 55929)

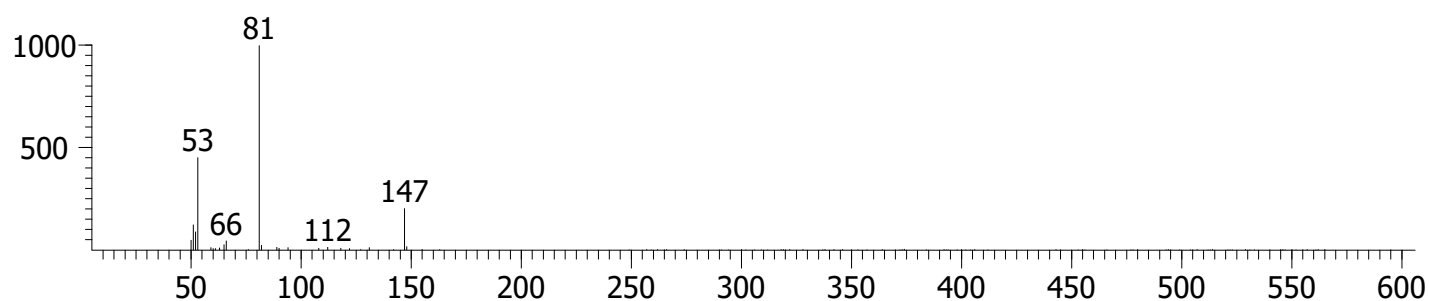

Library Hit - similarity 863, "1H-Pyrrole, 1-(2-furanylmethyl)-"

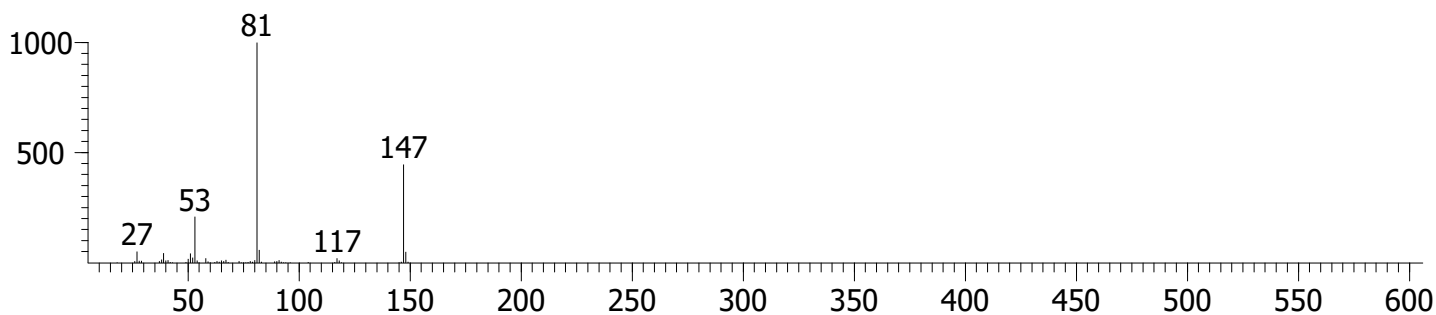

| Hit | Name                                                                                   | Similarity | Probability | CAS        | Library | Formula      | Weight |
|-----|----------------------------------------------------------------------------------------|------------|-------------|------------|---------|--------------|--------|
| 1   | 1H-Pyrrole, 1-(2-furanylmethyl)-                                                       | 863        | 6638        | 1438-94-4  | mainlib | C9H9NO       | 147    |
| 2   | 2,4-Pentadienoic acid, 1-cyclopenten-3-on-1-yl ester                                   | 816        | 1388        | 0-00-0     | mainlib | C10H10O3     | 178    |
| 3   | Furfuryl isothiocyanate                                                                | 767        | 285         | 4650-60-6  | mainlib | C6H5NOS      | 139    |
| 4   | 4-(2-Chloro-4-fluorophenyl)-1-(furan-2-ylmethyl)-4H,5H,7H-pyrazolo[3,4-b]pyridin-6-one | 766        | 274         | 0-00-0     | mainlib | C17H13ClFNO2 | 345    |
| 5   | Cyclohexane, 1-chloro-2-nitroso-                                                       | 763        | 242         | 16580-31-7 | mainlib | C6H10ClNO    | 147    |

## 4-Phenylbut-3-ene-1-yne

1st Dimension R.T. = 861.282

2nd Dimension R.T. = 1.841

Quant Mass(es) = 128

S/N = 13173

Area = 1659504

Height = 222761

Similarity = 923

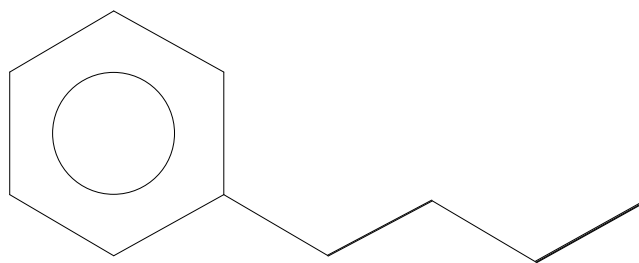

Peak Apex - sample "AerMBR A 092319 (20191119):1", peak 797, at 861.282 , 1.841 sec , sec (Spec # 58049 )

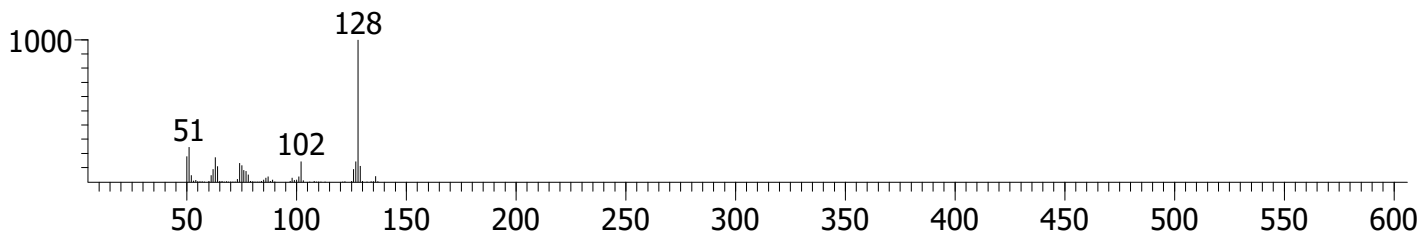

Peak True - sample "AerMBR A 092319 (20191119):1", peak 797, at 861.282 , 1.841 sec , sec (Spec # 58049)

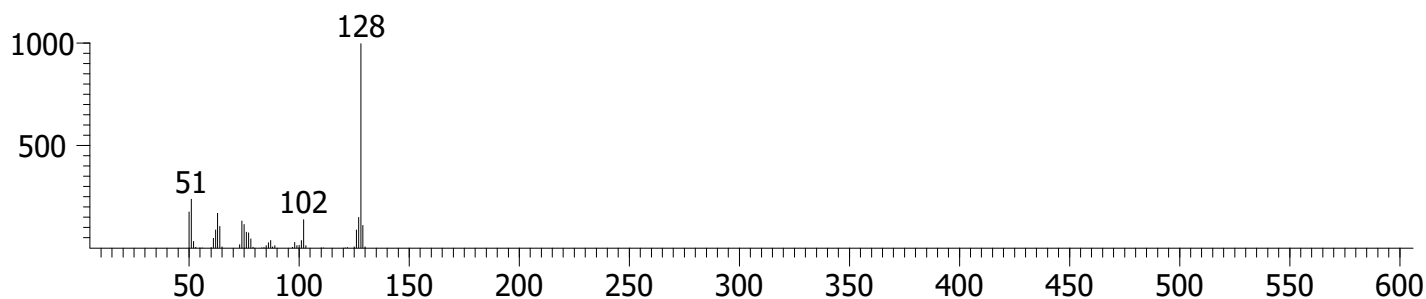

Library Hit - similarity 923, "4-Phenylbut-3-ene-1-yne"

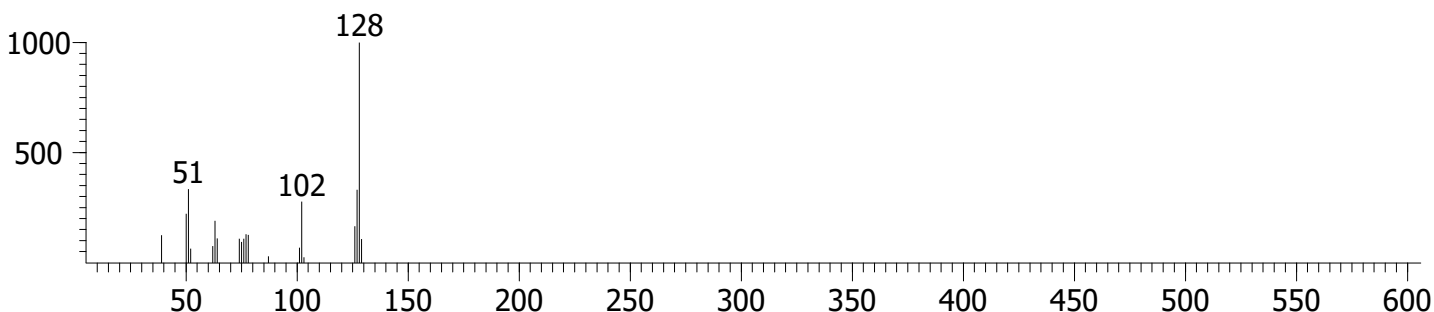

| Hit | Name                                                                | Similarity | Probability | CAS        | Library | Formula  | Weight |
|-----|---------------------------------------------------------------------|------------|-------------|------------|---------|----------|--------|
| 1   | 4-Phenylbut-3-ene-1-yne                                             | 923        | 3973        | 0-00-0     | mainlib | C10H8    | 128    |
| 2   | 1H-Indene, 1-methylene-                                             | 919        | 3356        | 2471-84-3  | mainlib | C10H8    | 128    |
| 3   | Azulene                                                             | 891        | 969         | 275-51-4   | mainlib | C10H8    | 128    |
| 4   | Naphthalene                                                         | 887        | 818         | 91-20-3    | mainlib | C10H8    | 128    |
| 5   | N-Methyl-9-aza-tricyclo[6.2.2.0(2,7)]dodec-2,4,6,11-tetraene-10-one | 872        | 496         | 13131-19-6 | mainlib | C12H11NO | 185    |



## Benzene, (2,2-dimethoxyethyl)-

1st Dimension R.T. = 896.262  
2nd Dimension R.T. = 1.670  
Quant Mass(es) = 75  
S/N = 680.39  
Area = 129984  
Height = 17644  
Similarity = 898

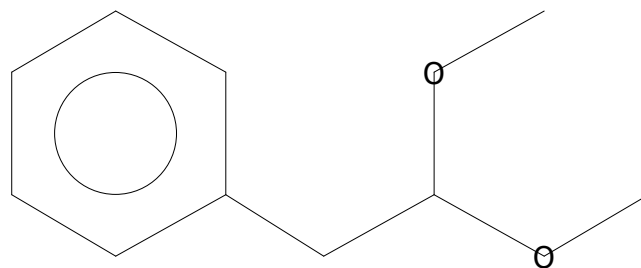

Peak Apex - sample "AerMBR A 092319 (20191119):1", peak 853, at 896.262 , 1.670 sec , sec (Spec # 63323 )

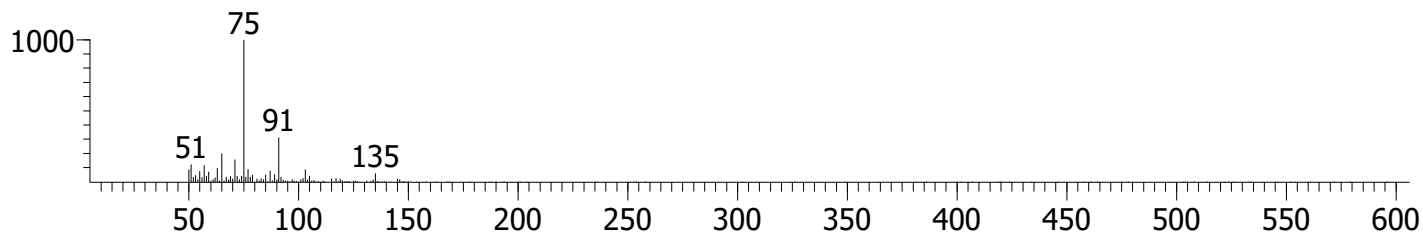

Peak True - sample "AerMBR A 092319 (20191119):1", peak 853, at 896.262 , 1.670 sec , sec (Spec # 63323)

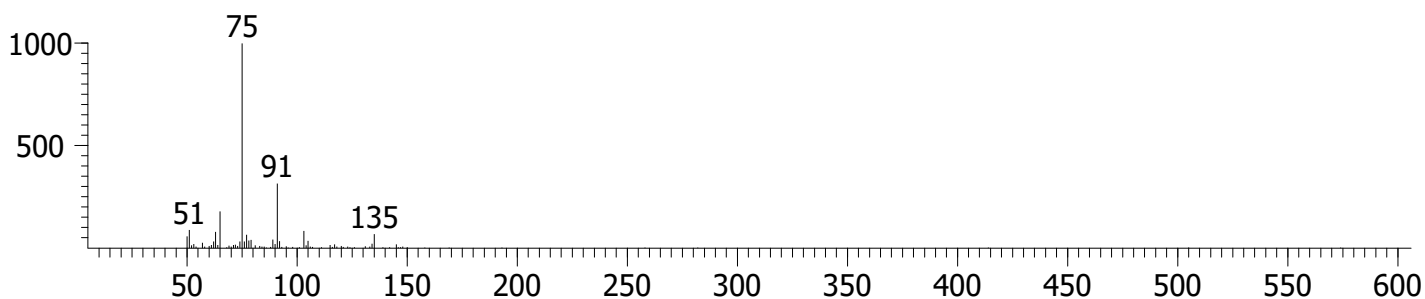

Library Hit - similarity 898, "Benzene, (2,2-dimethoxyethyl)-"

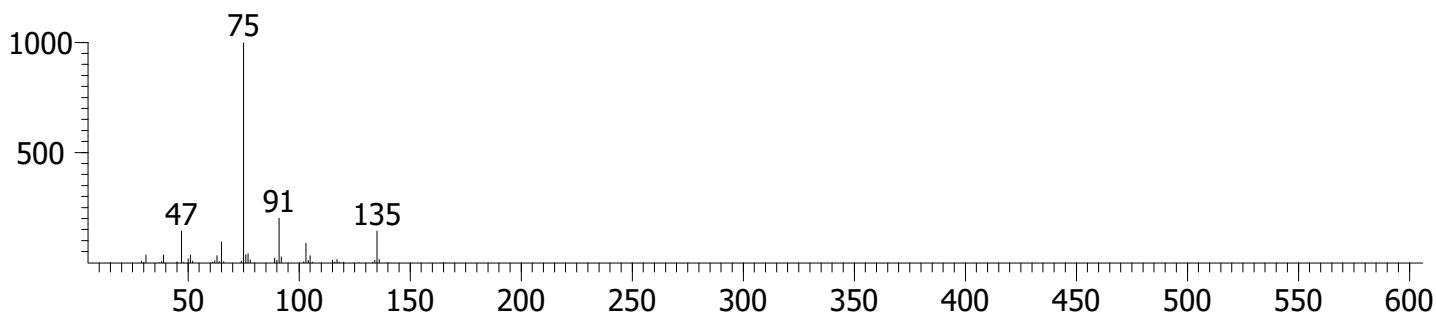

| Hit | Name                                        | Similarity | Probability | CAS         | Library | Formula   | Weight |
|-----|---------------------------------------------|------------|-------------|-------------|---------|-----------|--------|
| 1   | Benzene, (2,2-dimethoxyethyl)-              | 898        | 9702        | 101-48-4    | mainlib | C10H14O2  | 166    |
| 2   | Benzoyloxyacetaldehyde dimethyl acetal      | 723        | 194         | 127657-97-0 | mainlib | C11H16O3  | 196    |
| 3   | N-Benzylaminoacetaldehyde diethyl acetal    | 670        | 38          | 61190-10-1  | mainlib | C13H21NO2 | 223    |
| 4   | benzenemethanamine, N-(2,2-dimethoxyethyl)- | 647        | 14          | 0-00-0      | mainlib | C11H17NO2 | 195    |
| 5   | Benzene, [2-(ethylthio)ethyl]-              | 644        | 12          | 22914-08-5  | mainlib | C10H14S   | 166    |

## Phenol, 4-ethenyl-, acetate

1st Dimension R.T. = 903.258

2nd Dimension R.T. = 1.795

Quant Mass(es) = 120

S/N = 164.32

Area = 36968

Height = 4971.0

Similarity = 770

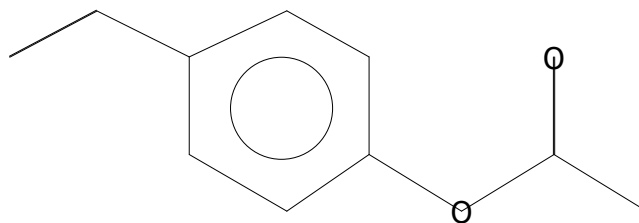

Peak Apex - sample "AerMBR A 092319 (20191119):1", peak 869, at 903.258 , 1.795 sec , sec (Spec # 64402 )

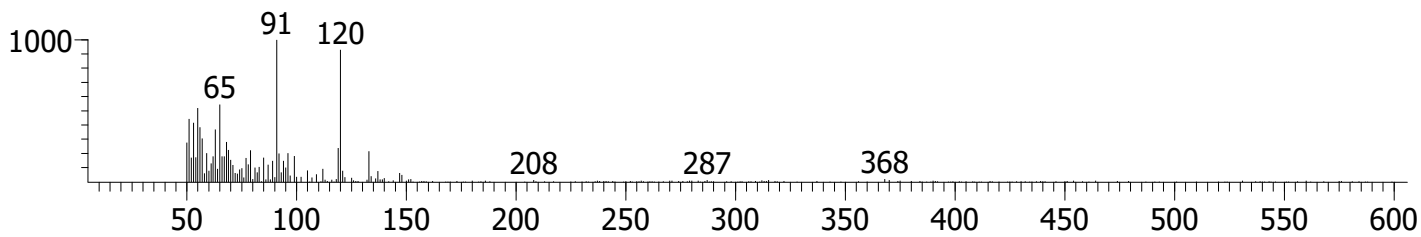

Peak True - sample "AerMBR A 092319 (20191119):1", peak 869, at 903.258 , 1.795 sec , sec (Spec # 64402)

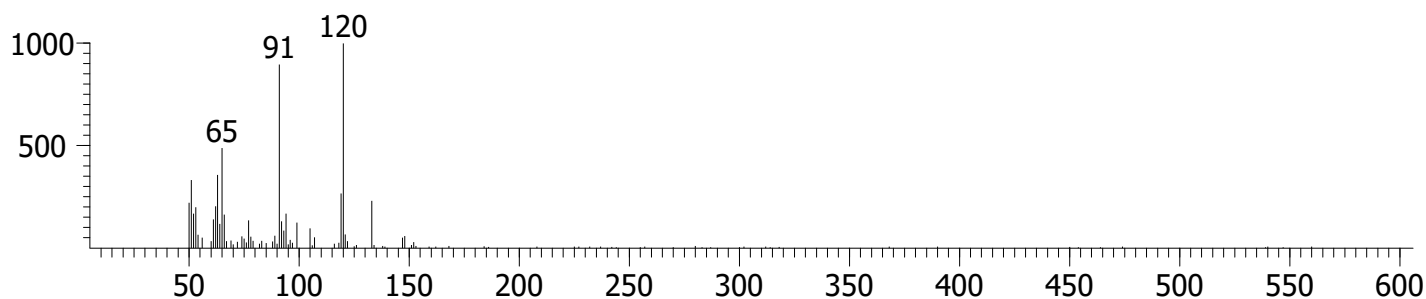

Library Hit - similarity 770, "Phenol, 4-ethenyl-, acetate"

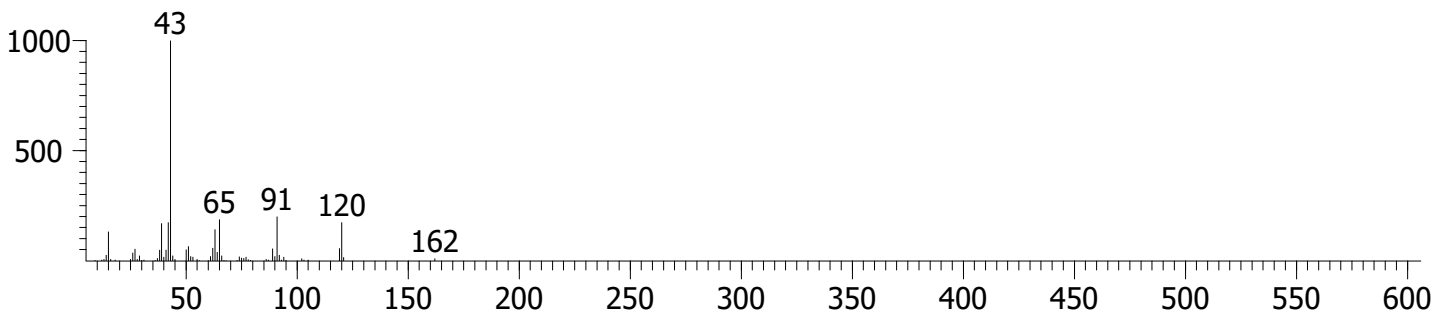

| Hit | Name                                                      | Similarity | Probability | CAS        | Library | Formula  | Weight |
|-----|-----------------------------------------------------------|------------|-------------|------------|---------|----------|--------|
| 1   | Phenol, 4-ethenyl-, acetate                               | 770        | 3673        | 2628-16-2  | mainlib | C10H10O2 | 162    |
| 2   | Benzene, (ethenyloxy)-                                    | 760        | 2593        | 766-94-9   | mainlib | C8H8O    | 120    |
| 3   | Benzofuran, 2,3-dihydro-                                  | 737        | 947         | 496-16-2   | mainlib | C8H8O    | 120    |
| 4   | 6-Methylenebicyclo[3.2.0]hept-3-en-2-one                  | 717        | 431         | 0-00-0     | mainlib | C8H8O    | 120    |
| 5   | 2,3,5-Trioxabicyclo[2.1.0]pentane, 1,4-bis(phenylmethyl)- | 697        | 196         | 56247-48-4 | mainlib | C16H14O3 | 254    |

## Benzothiazole

1st Dimension R.T. = 917.25  
2nd Dimension R.T. = 2.119  
Quant Mass(es) = 135  
S/N = 1978.5  
Area = 565426  
Height = 61299  
Similarity = 923

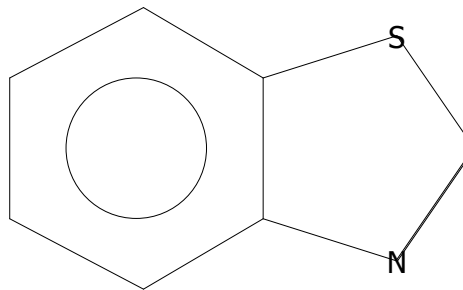

Peak Apex - sample "AerMBR A 092319 (20191119):1", peak 895, at 917.25 , 2.119 sec , sec (Spec # 66571)

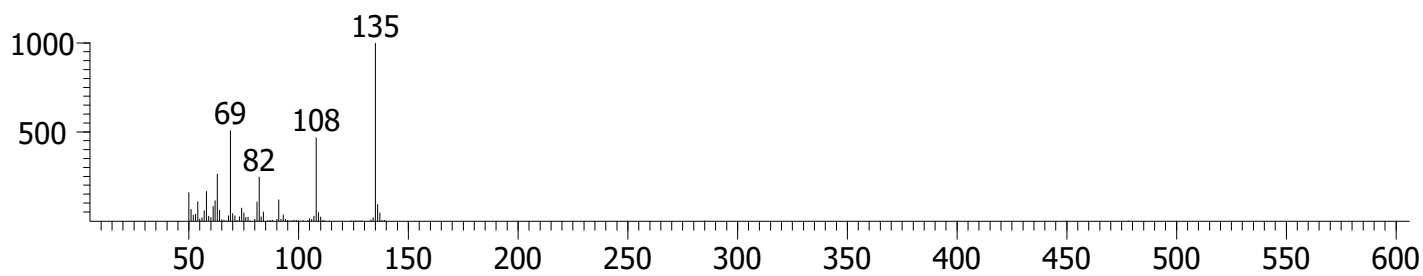

Peak True - sample "AerMBR A 092319 (20191119):1", peak 895, at 917.25 , 2.119 sec , sec (Spec # 66571)

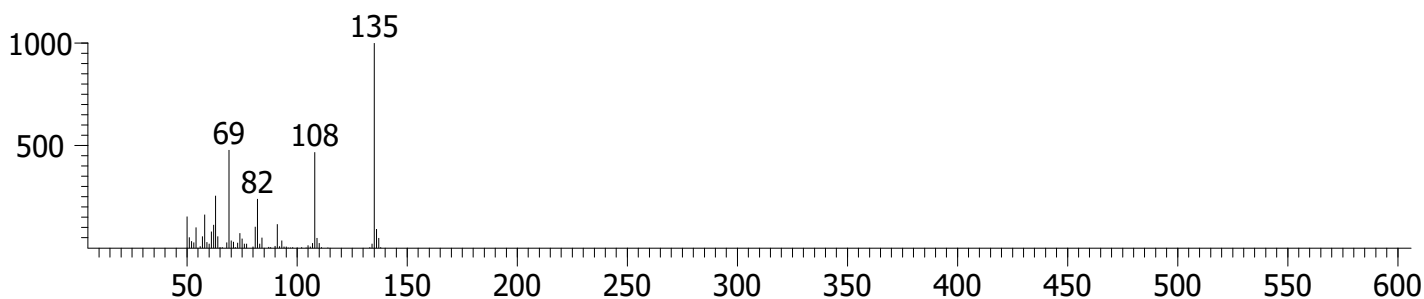

Library Hit - similarity 923, "Benzothiazole"

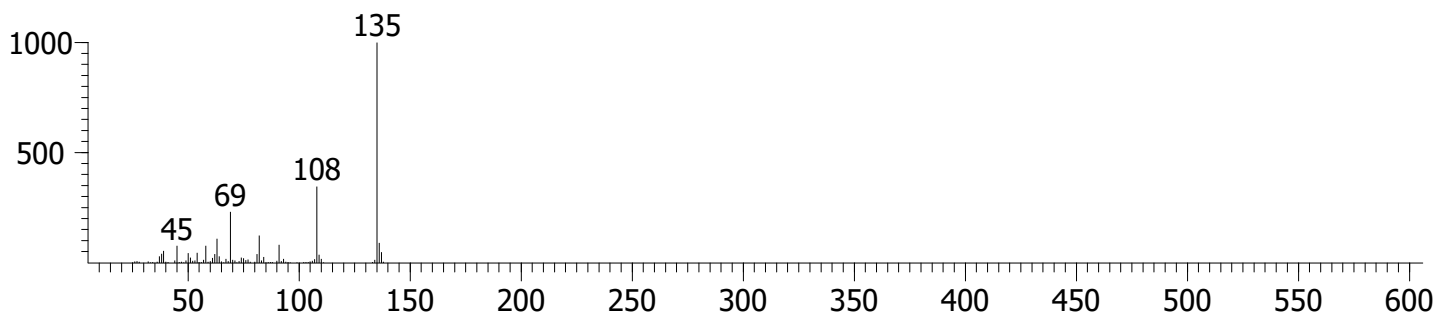

| Hit | Name                            | Similarity | Probability | CAS        | Library | Formula    | Weight |
|-----|---------------------------------|------------|-------------|------------|---------|------------|--------|
| 1   | Benzothiazole                   | 923        | 7611        | 95-16-9    | mainlib | C7H5NS     | 135    |
| 2   | 1,2-Benzisothiazole             | 886        | 1852        | 272-16-2   | mainlib | C7H5NS     | 135    |
| 3   | Thieno[3,2-c]pyridine           | 809        | 226         | 272-14-0   | mainlib | C7H5NS     | 135    |
| 4   | Benzothiazole-2-carboxylic acid | 798        | 155         | 3622-04-6  | mainlib | C8H5NO2S   | 179    |
| 5   | 3-Allylbenzothiazolium bromide  | 786        | 103         | 16407-55-9 | mainlib | C10H10BrNS | 255    |

## (-)-Carvone

1st Dimension R.T. = 934.74  
2nd Dimension R.T. = 1.676  
Quant Mass(es) = 82  
S/N = 370.17  
Area = 85312  
Height = 10944  
Similarity = 882

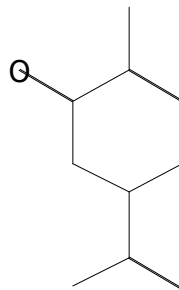

Peak Apex - sample "AerMBR A 092319 (20191119):1", peak 924, at 934.74 , 1.676 sec , sec (Spec # 69154)

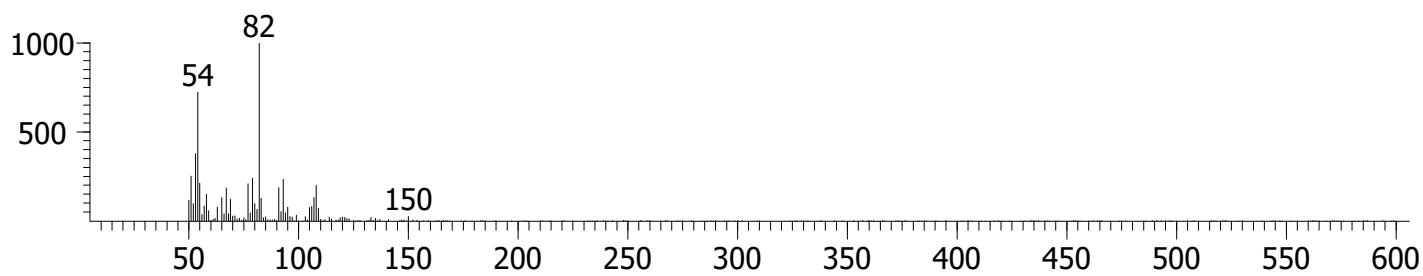

Peak True - sample "AerMBR A 092319 (20191119):1", peak 924, at 934.74 , 1.676 sec , sec (Spec # 69154)

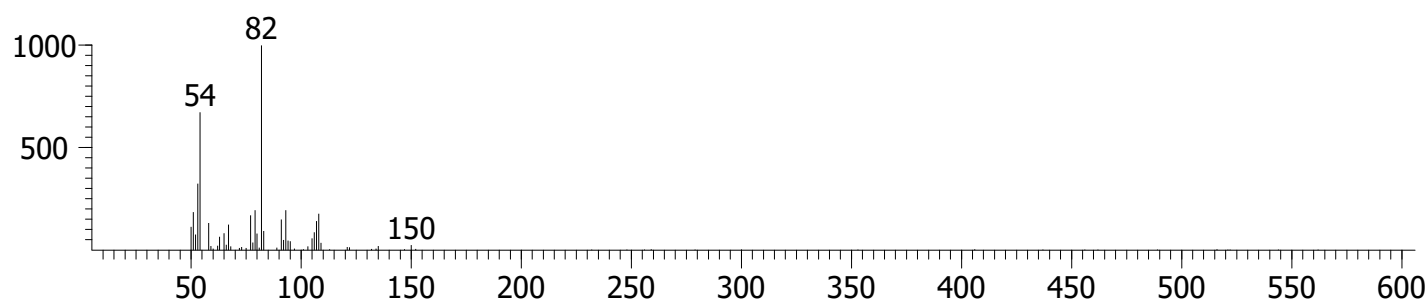

Library Hit - similarity 882, "(-)-Carvone"

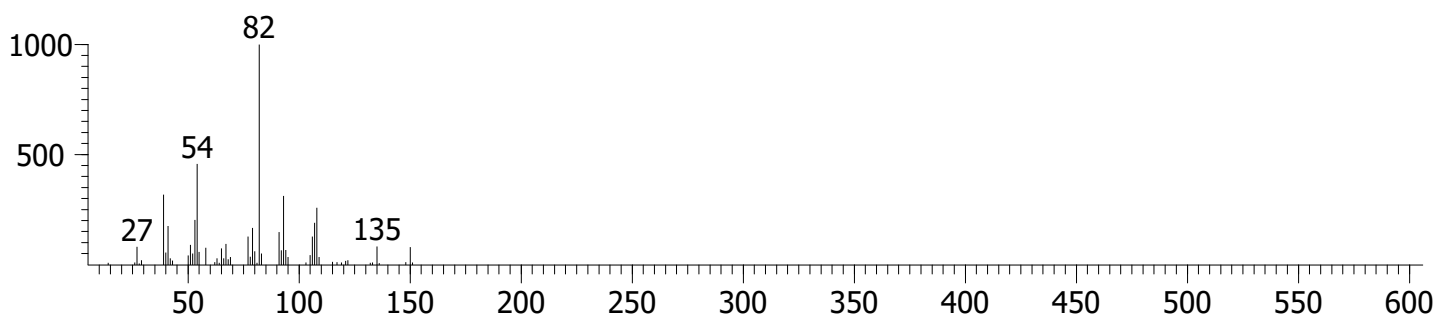

| Hit | Name                                                               | Similarity | Probability | CAS         | Library | Formula  | Weight |
|-----|--------------------------------------------------------------------|------------|-------------|-------------|---------|----------|--------|
| 1   | (-)-Carvone                                                        | 882        | 6393        | 6485-40-1   | mainlib | C10H14O  | 150    |
| 2   | Carvone                                                            | 859        | 2334        | 99-49-0     | mainlib | C10H14O  | 150    |
| 3   | D-Carvone                                                          | 839        | 1063        | 2244-16-8   | mainlib | C10H14O  | 150    |
| 4   | 2(3H)-Furanone, 4,5-dihydro-4-(2-methyl-3-methylene-1-buten-4-yl)- | 667        | 22          | 0-00-0      | mainlib | C10H14O2 | 166    |
| 5   | Spiro[cyclopropane-1,6'-[3]oxatricyclo[3.2.1.0(2,4)]octane]        | 658        | 16          | 107079-37-8 | mainlib | C9H12O   | 136    |

## Ethosuximide

1st Dimension R.T. = 941.736

2nd Dimension R.T. = 1.927

Quant Mass(es) = 113

S/N = 596.19

Area = 117972

Height = 14375

Similarity = 826

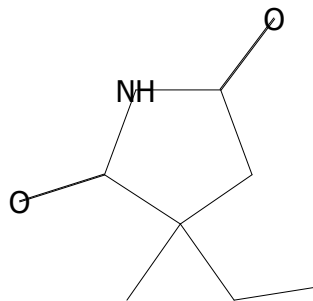

Peak Apex - sample "AerMBR A 092319 (20191119):1", peak 941, at 941.736 , 1.927 sec , sec (Spec # 70252 )

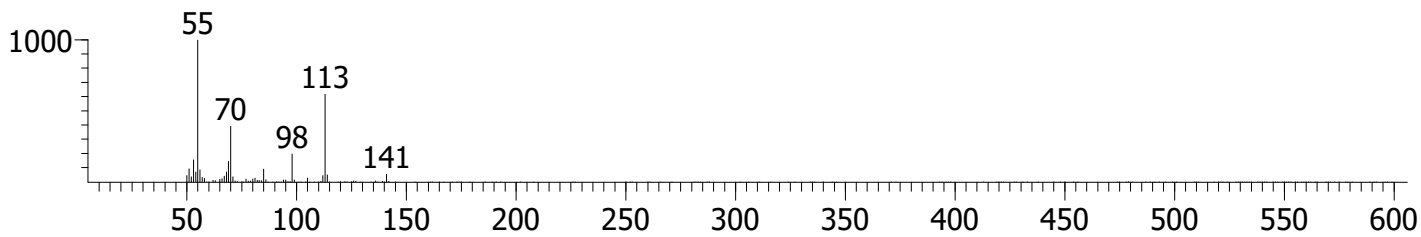

Peak True - sample "AerMBR A 092319 (20191119):1", peak 941, at 941.736 , 1.927 sec , sec (Spec # 70252)

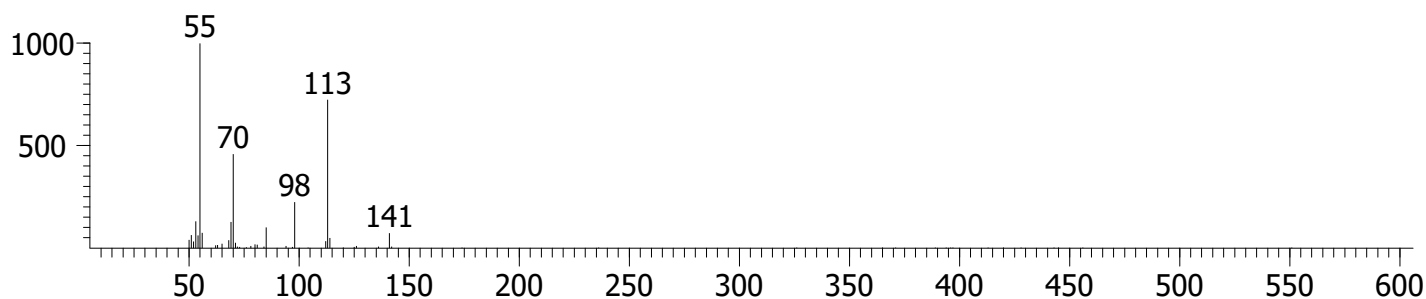

Library Hit - similarity 826, "Ethosuximide"

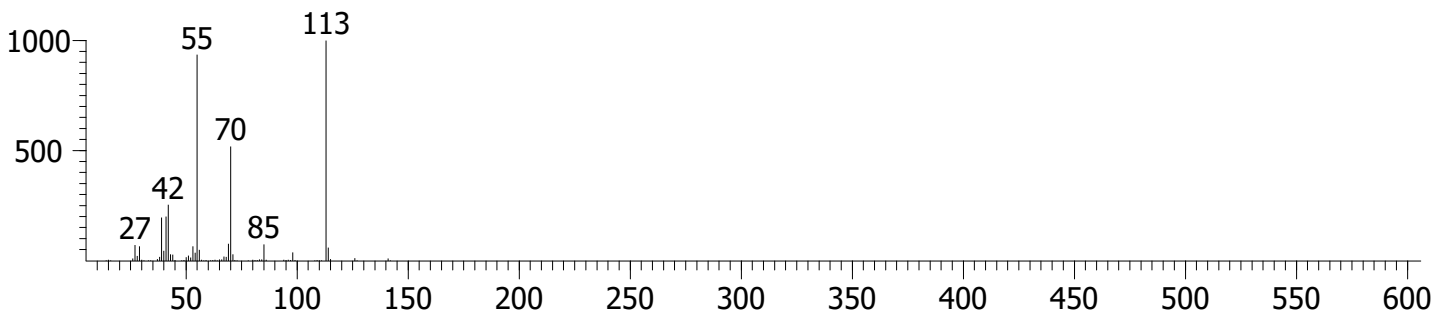

| Hit | Name                                           | Similarity | Probability | CAS        | Library | Formula  | Weight |
|-----|------------------------------------------------|------------|-------------|------------|---------|----------|--------|
| 1   | Ethosuximide                                   | 826        | 7248        | 77-67-8    | mainlib | C7H11NO2 | 141    |
| 2   | 2,5-Pyrrolidinedione, 3-methyl-4-propyl-, cis- | 740        | 645         | 16493-22-4 | mainlib | C8H13NO2 | 155    |
| 3   | Pyrrolidine, 1-(3-methyl-1-oxohexadecyl)-      | 697        | 142         | 56630-57-0 | mainlib | C21H41NO | 323    |
| 4   | Pyrrolidine, 1-(3-methyl-1-oxoheptadecyl)-     | 694        | 125         | 0-00-0     | mainlib | C22H43NO | 337    |
| 5   | Octanoic acid, pyrrolidide                     | 688        | 98          | 0-00-0     | mainlib | C12H23NO | 197    |

# Ethanone, 1-(3,4-dimethylphenyl)-

1st Dimension R.T. = 962.724  
2nd Dimension R.T. = 1.762  
Quant Mass(es) = 133  
S/N = 347.53  
Area = 59255  
Height = 7253.2  
Similarity = 873

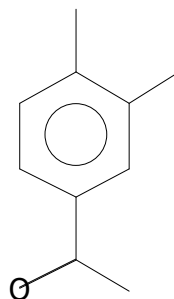

Peak Apex - sample "AerMBR A 092319 (20191119):1", peak 980, at 962.724 , 1.762 sec , sec (Spec # 73407 )

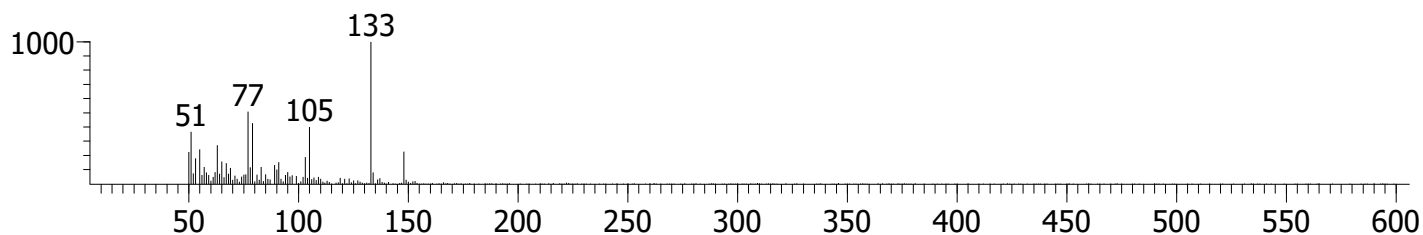

Peak True - sample "AerMBR A 092319 (20191119):1", peak 980, at 962.724 , 1.762 sec , sec (Spec # 73407)

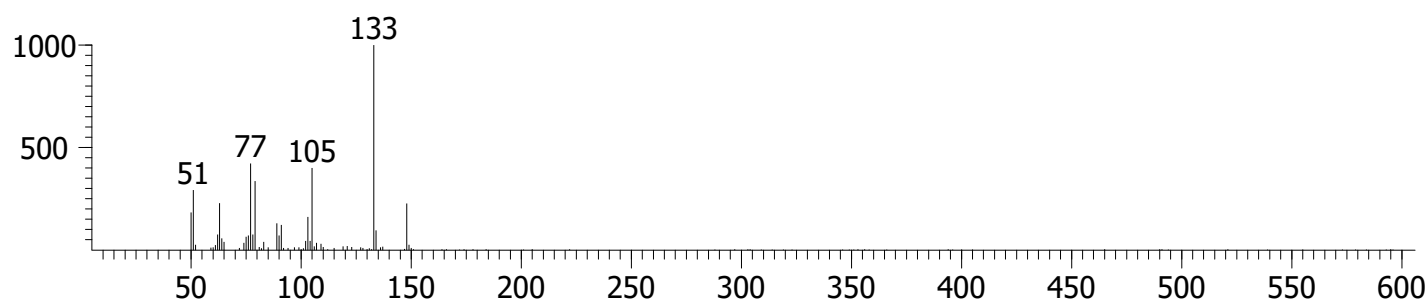

Library Hit - similarity 873, "Ethanone, 1-(3,4-dimethylphenyl)-"

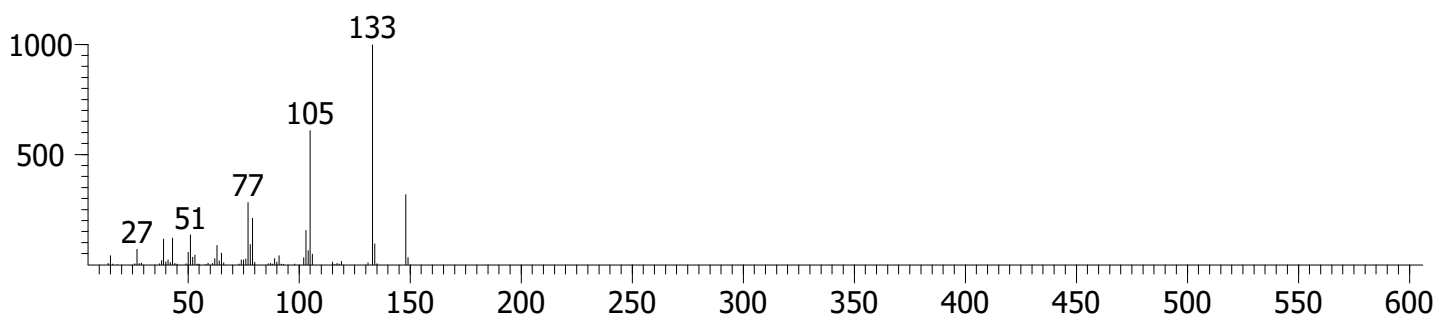

| Hit | Name                              | Similarity | Probability | CAS        | Library | Formula | Weight |
|-----|-----------------------------------|------------|-------------|------------|---------|---------|--------|
| 1   | Ethanone, 1-(3,4-dimethylphenyl)- | 873        | 2343        | 3637-01-2  | mainlib | C10H12O | 148    |
| 2   | m-Ethylacetophenone               | 861        | 1560        | 22699-70-3 | mainlib | C10H12O | 148    |
| 3   | Ethanone, 1-(4-ethylphenyl)-      | 858        | 1379        | 937-30-4   | mainlib | C10H12O | 148    |
| 4   | 4-Ethylbenzoyl chloride           | 849        | 1001        | 16331-45-6 | mainlib | C9H9ClO | 168    |
| 5   | Ethanone, 1-(2,5-dimethylphenyl)- | 834        | 606         | 2142-73-6  | mainlib | C10H12O | 148    |

D-Glucitol,  
1,4:3,6-dianhydro-2,5-di-O-methyl-

1st Dimension R.T. = 973.218  
2nd Dimension R.T. = 1.907  
Quant Mass(es) = 58  
S/N = 2676.5  
Area = 1167593  
Height = 132014  
Similarity = 868

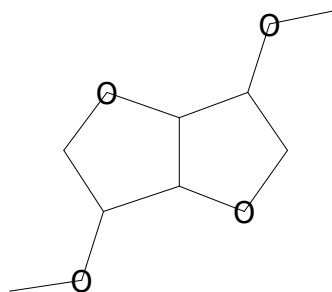

Peak Apex - sample "AerMBR A 092319 (20191119):1", peak 1005, at 973.218 , 1.907 sec , sec (Spec # 75019)

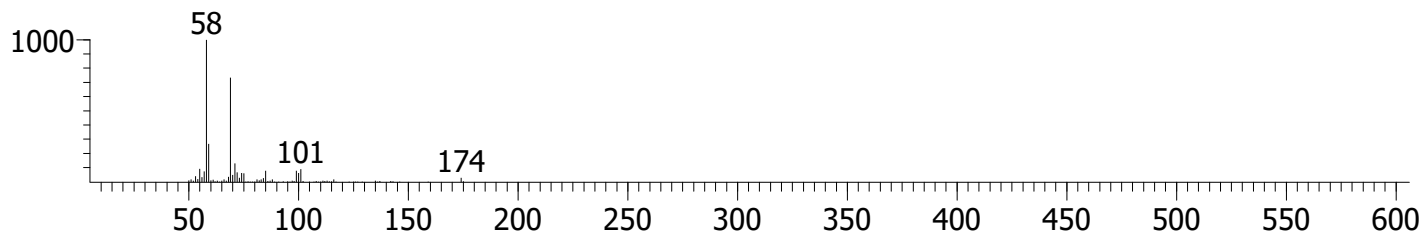

Peak True - sample "AerMBR A 092319 (20191119):1", peak 1005, at 973.218 , 1.907 sec , sec (Spec # 75019)

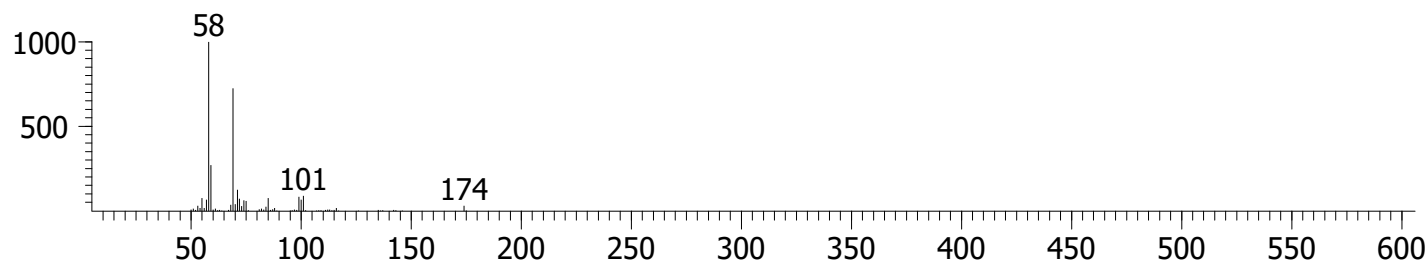

Library Hit - similarity 868, "D-Glucitol, 1,4:3,6-dianhydro-2,5-di-O-methyl-"

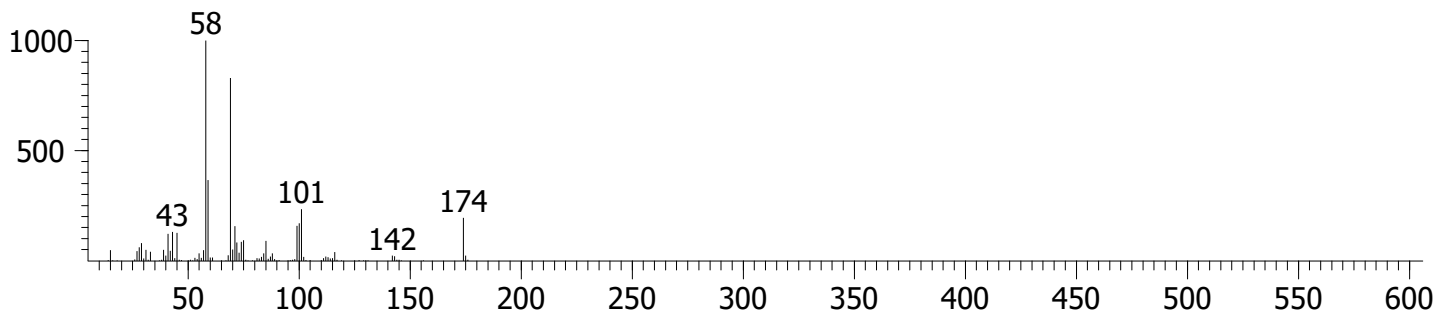

| Hit | Name                                                       | Similarity | Probability | CAS        | Library | Formula  | Weight |
|-----|------------------------------------------------------------|------------|-------------|------------|---------|----------|--------|
| 1   | D-Glucitol, 1,4:3,6-dianhydro-2,5-di-O-methyl-             | 868        | 9360        | 5306-85-4  | mainlib | C8H14O4  | 174    |
| 2   | 1,3:2,5-Dimethylene-4-methyl-d-rhamnitol                   | 700        | 213         | 7464-25-7  | mainlib | C9H16O5  | 204    |
| 3   | 2-Propenoic acid, 2-methyl-, 2-hydroxypropyl ester         | 683        | 116         | 923-26-2   | mainlib | C7H12O3  | 144    |
| 4   | Cyclopropanecarboxylic acid, 4-methoxy-2-methylbutyl ester | 676        | 89          | 0-00-0     | mainlib | C10H18O3 | 186    |
| 5   | 2-Pentanone, 5-methoxy-                                    | 649        | 26          | 17429-04-8 | mainlib | C6H12O2  | 116    |

# Heptadecane, 2,6,10,14-tetramethyl-

1st Dimension R.T. = 983.712

2nd Dimension R.T. = 1.122

Quant Mass(es) = 71

S/N = 657.71

Area = 177535

Height = 25048

Similarity = 927

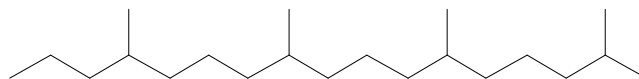

Peak Apex - sample "AerMBR A 092319 (20191119):1", peak 1021, at 983.712 , 1.122 sec , sec (Spec # 7649 0)

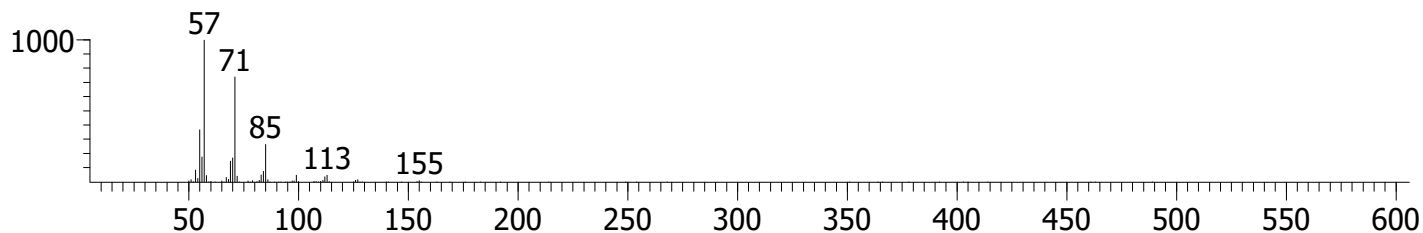

Peak True - sample "AerMBR A 092319 (20191119):1", peak 1021, at 983.712 , 1.122 sec , sec (Spec # 7649 0)

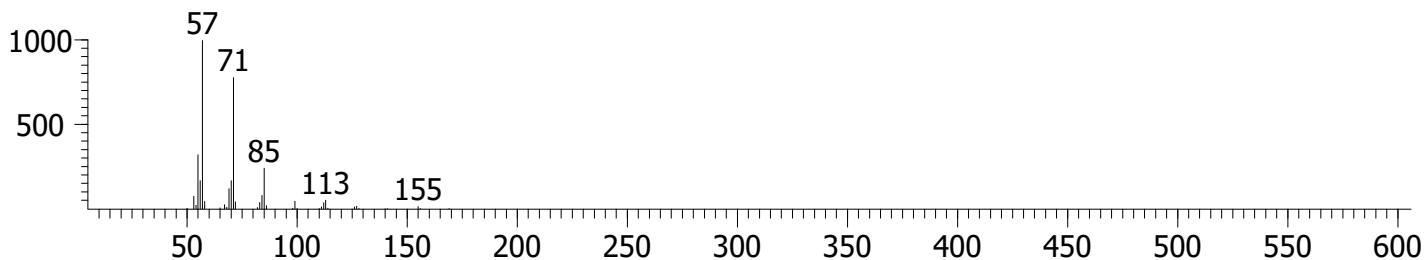

Library Hit - similarity 927, "Heptadecane, 2,6,10,14-tetramethyl-"

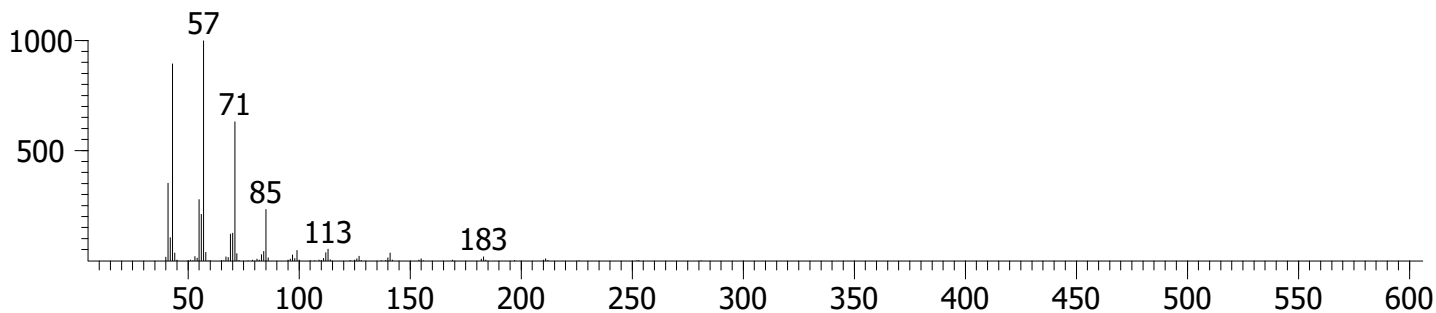

| Hit | Name                                | Similarity | Probability | CAS         | Library | Formula                         | Weight |
|-----|-------------------------------------|------------|-------------|-------------|---------|---------------------------------|--------|
| 1   | Heptadecane, 2,6,10,14-tetramethyl- | 927        | 1523        | 18344-37-1  | mainlib | C <sub>21</sub> H <sub>44</sub> | 296    |
| 2   | Heptadecane, 2,6-dimethyl-          | 921        | 1197        | 54105-67-8  | mainlib | C <sub>19</sub> H <sub>40</sub> | 268    |
| 3   | Dodecane, 4,6-dimethyl-             | 910        | 821         | 61141-72-8  | mainlib | C <sub>14</sub> H <sub>30</sub> | 198    |
| 4   | Decane, 2,3,5,8-tetramethyl-        | 905        | 662         | 192823-15-7 | mainlib | C <sub>14</sub> H <sub>30</sub> | 198    |
| 5   | 2,6,10-Trimethyltridecane           | 900        | 533         | 3891-99-4   | mainlib | C <sub>16</sub> H <sub>34</sub> | 226    |



# Tricyclo[5.2.1.0(2,6)]dec-3-en-10-one

1st Dimension R.T. = 990.708  
2nd Dimension R.T. = 1.934  
Quant Mass(es) = 148  
S/N = 234.19  
Area = 45422  
Height = 4464.7  
Similarity = 899

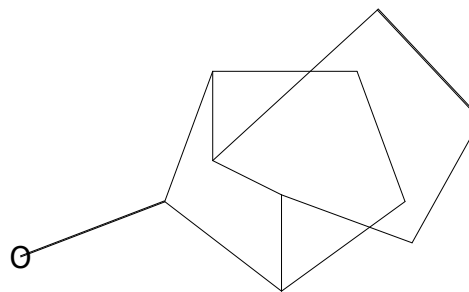

Peak Apex - sample "AerMBR A 092319 (20191119):1", peak 1037, at 990.708 , 1.934 sec , sec (Spec # 7767 3)

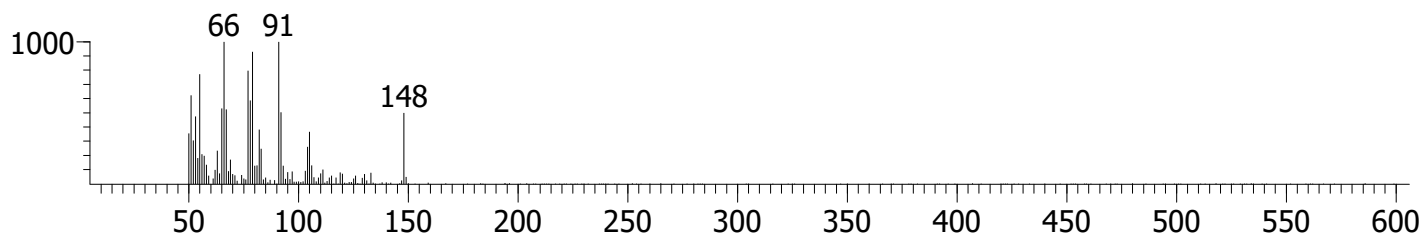

Peak True - sample "AerMBR A 092319 (20191119):1", peak 1037, at 990.708 , 1.934 sec , sec (Spec # 7767 3)

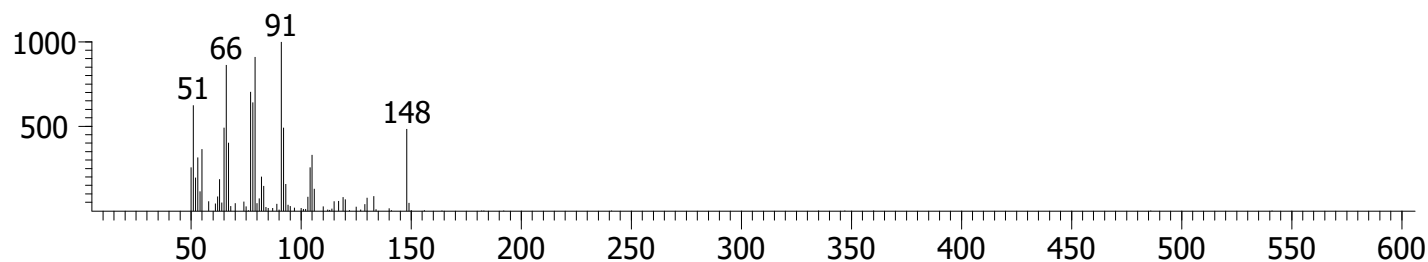

Library Hit - similarity 899, "Tricyclo[5.2.1.0(2,6)]dec-3-en-10-one"

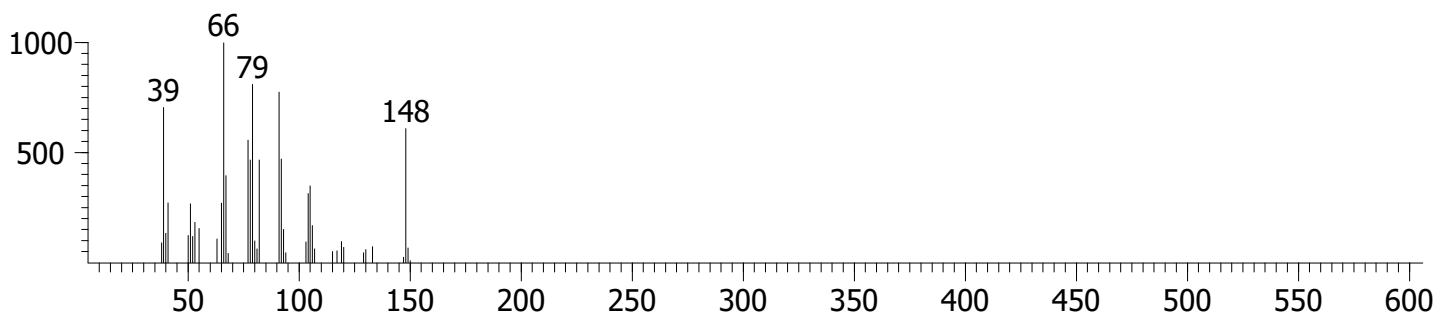

| Hit | Name                                                 | Similarity | Probability | CAS        | Library | Formula | Weight |
|-----|------------------------------------------------------|------------|-------------|------------|---------|---------|--------|
| 1   | Tricyclo[5.2.1.0(2,6)]dec-3-en-10-one                | 899        | 7653        | 0-00-0     | mainlib | C10H12O | 148    |
| 2   | 4,7-Methano-5H-inden-5-one, 3,3a,4,6,7,7a-hexahydro- | 840        | 1383        | 14888-58-5 | mainlib | C10H12O | 148    |
| 3   | Tricyclo[4.2.1.1(2,5)]dec-3-en-9-one                 | 799        | 315         | 67009-89-6 | mainlib | C10H12O | 148    |
| 4   | Tricyclo[5.2.1.0(2,6)]dec-4-en-8-one                 | 782        | 172         | 0-00-0     | mainlib | C10H12O | 148    |
| 5   | Tetracyclo[3.3.1.1(3,7).0(4,6)]decan-2-one           | 758        | 57          | 52750-53-5 | mainlib | C10H12O | 148    |

Acetic acid,  
2-(5-methyl-1,3,4-thiadiazol-2-ylthio)-

1st Dimension R.T. = 994.206  
2nd Dimension R.T. = 2.290  
Quant Mass(es) = 146  
S/N = 3557.3  
Area = 549248  
Height = 56680  
Similarity = 705

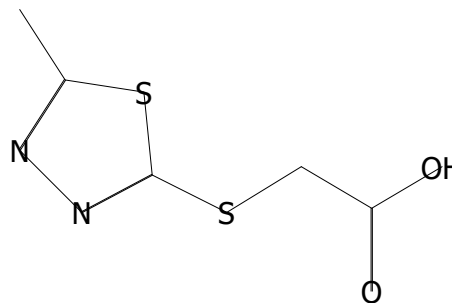

Peak Apex - sample "AerMBR A 092319 (20191119):1", peak 1049, at 994.206 , 2.290 sec , sec (Spec # 78257)

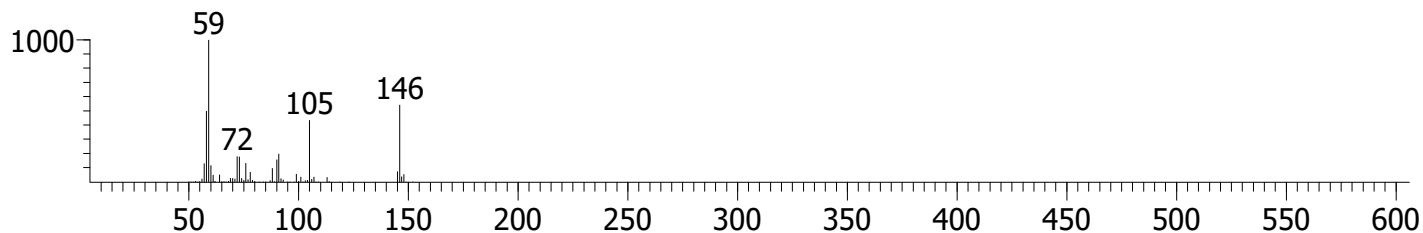

Peak True - sample "AerMBR A 092319 (20191119):1", peak 1049, at 994.206 , 2.290 sec , sec (Spec # 78257)

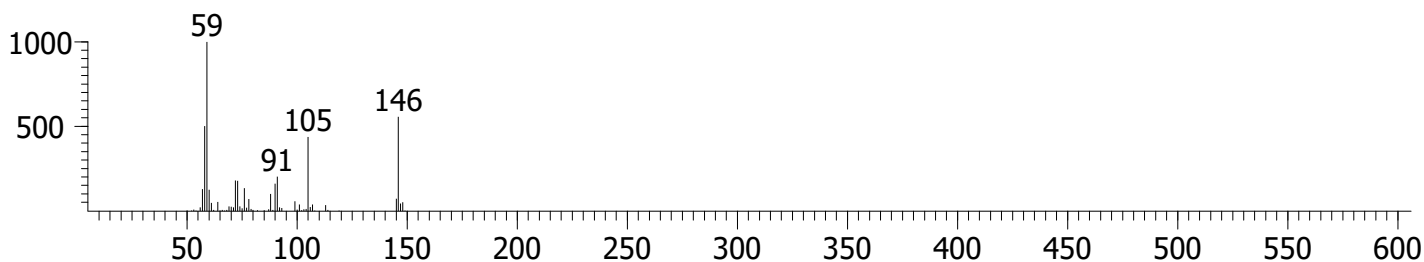

Library Hit - similarity 705, "Acetic acid, 2-(5-methyl-1,3,4-thiadiazol-2-ylthio)-"

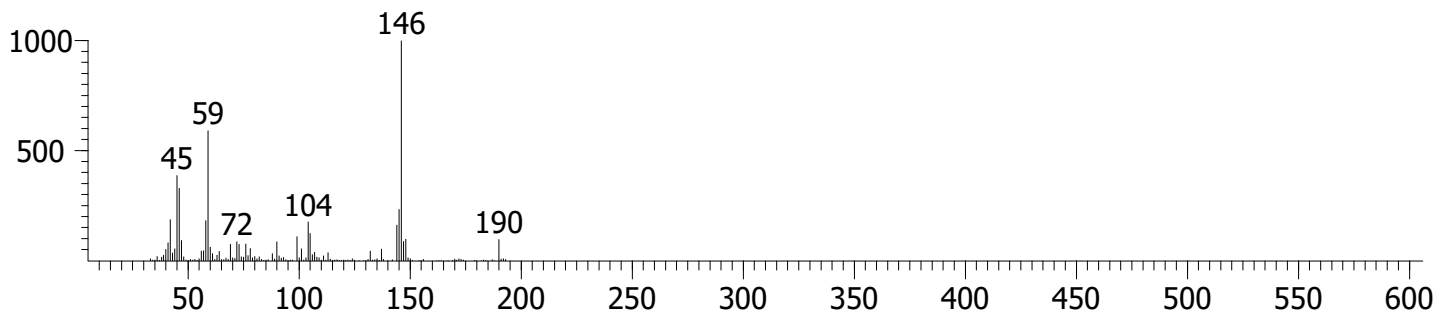

| Hit | Name                                                          | Similarity | Probability | CAS        | Library | Formula    | Weight |
|-----|---------------------------------------------------------------|------------|-------------|------------|---------|------------|--------|
| 1   | Acetic acid, 2-(5-methyl-1,3,4-thiadiazol-2-ylthio)-          | 705        | 4933        | 50918-26-8 | mainlib | C5H6N2O2S2 | 190    |
| 2   | 1,3,4-Thiadiazole-2(3H)-thione, 3,5-dimethyl-                 | 694        | 3384        | 7111-96-8  | mainlib | C4H6N2S2   | 146    |
| 3   | 5,6-Dimethyl-1,3,4-dithiapyridazine                           | 622        | 471         | 21423-60-9 | mainlib | C4H6N2S2   | 146    |
| 4   | L-Alanine, N-(2-methoxyethoxycarbonyl)-, hexyl ester          | 580        | 105         | 0-00-0     | mainlib | C13H25NO5  | 275    |
| 5   | L-Alanine, N-(2-methoxyethoxycarbonyl)-, 2-methoxyethyl ester | 579        | 101         | 0-00-0     | mainlib | C10H19NO6  | 249    |

## 2-Pentanamine, N-ethyl-4-methyl-

1st Dimension R.T. = 1008.2

2nd Dimension R.T. = 1.597

Quant Mass(es) = 72

S/N = 3518.5

Area = 770193

Height = 92548

Similarity = 831

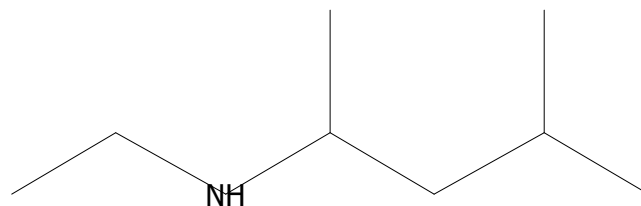

Peak Apex - sample "AerMBR A 092319 (20191119):1", peak 1073, at 1008.2 , 1.597 sec , sec (Spec # 80272 )

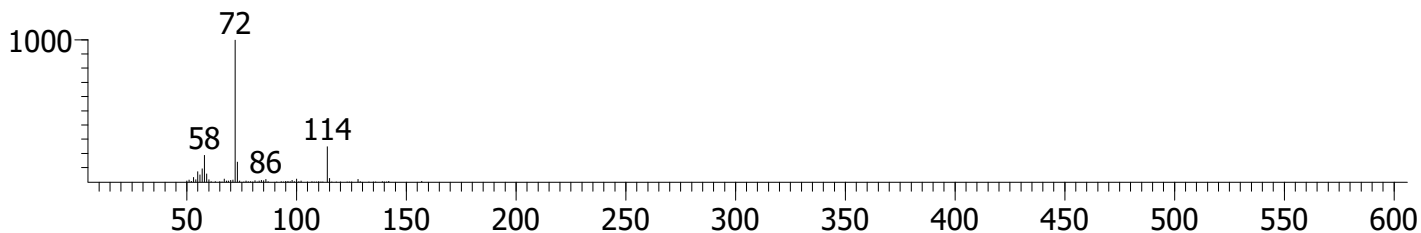

Peak True - sample "AerMBR A 092319 (20191119):1", peak 1073, at 1008.2 , 1.597 sec , sec (Spec # 80272)

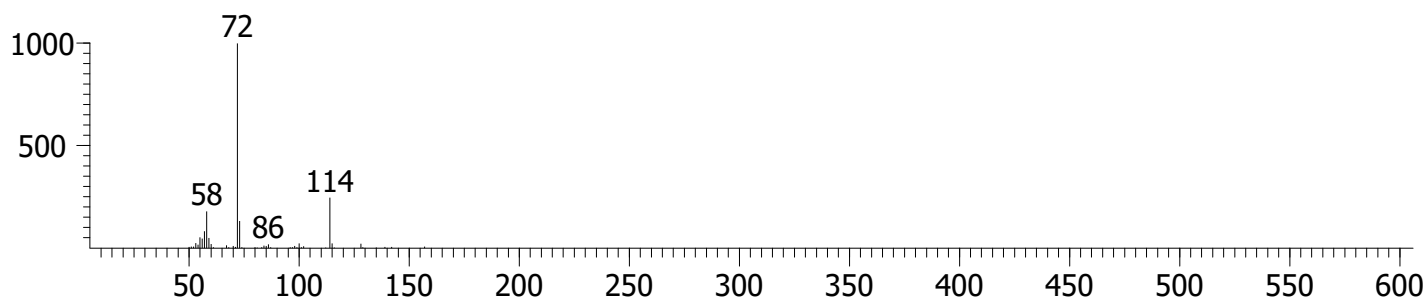

Library Hit - similarity 831, "2-Pentanamine, N-ethyl-4-methyl-"

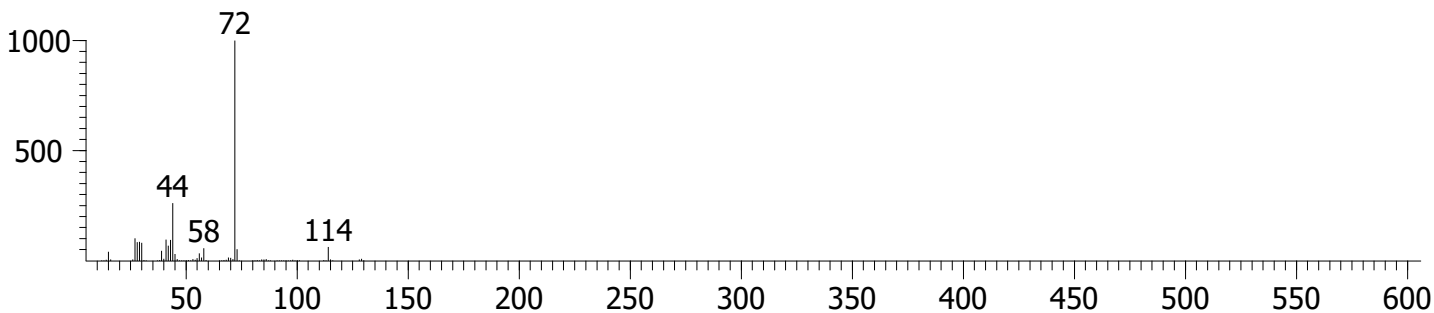

| Hit | Name                              | Similarity | Probability | CAS         | Library | Formula | Weight |
|-----|-----------------------------------|------------|-------------|-------------|---------|---------|--------|
| 1   | 2-Pentanamine, N-ethyl-4-methyl-  | 831        | 4100        | 42966-64-3  | mainlib | C8H19N  | 129    |
| 2   | Formamide, N,N-dibutyl-           | 830        | 3941        | 761-65-9    | mainlib | C9H19NO | 157    |
| 3   | Propylneopentylamine              | 788        | 884         | 131229-65-7 | mainlib | C8H19N  | 129    |
| 4   | 1-Hexanamine, N-propyl-           | 776        | 589         | 20193-23-1  | mainlib | C9H21N  | 143    |
| 5   | Ethylamine, N-methyl-N-hexadecyl- | 750        | 176         | 66997-40-8  | mainlib | C19H41N | 283    |

## Benzocycloheptatriene

1st Dimension R.T. = 1011.7  
2nd Dimension R.T. = 1.815  
Quant Mass(es) = 142  
S/N = 1627.9  
Area = 119932  
Height = 16181  
Similarity = 922

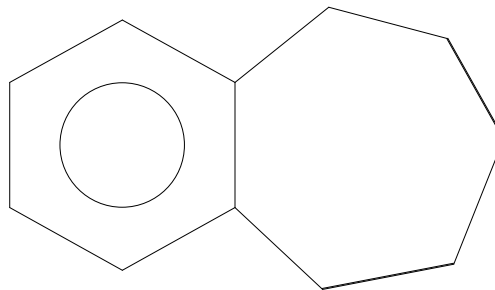

Peak Apex - sample "AerMBR A 092319 (20191119):1", peak 1088, at 1011.7 , 1.815 sec , sec (Spec # 80835 )

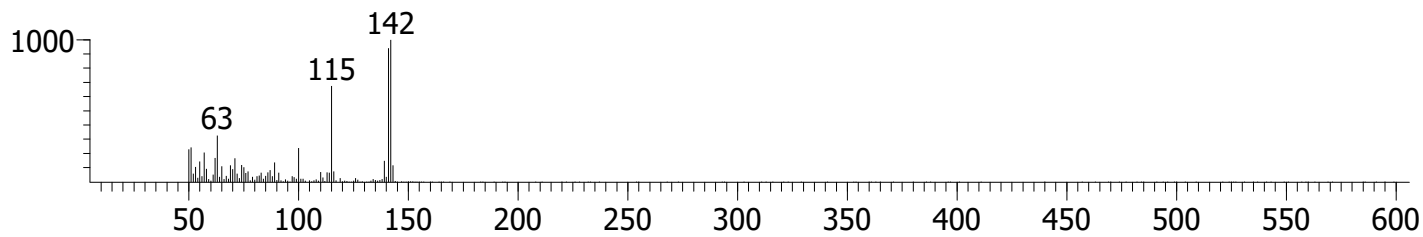

Peak True - sample "AerMBR A 092319 (20191119):1", peak 1088, at 1011.7 , 1.815 sec , sec (Spec # 80835)

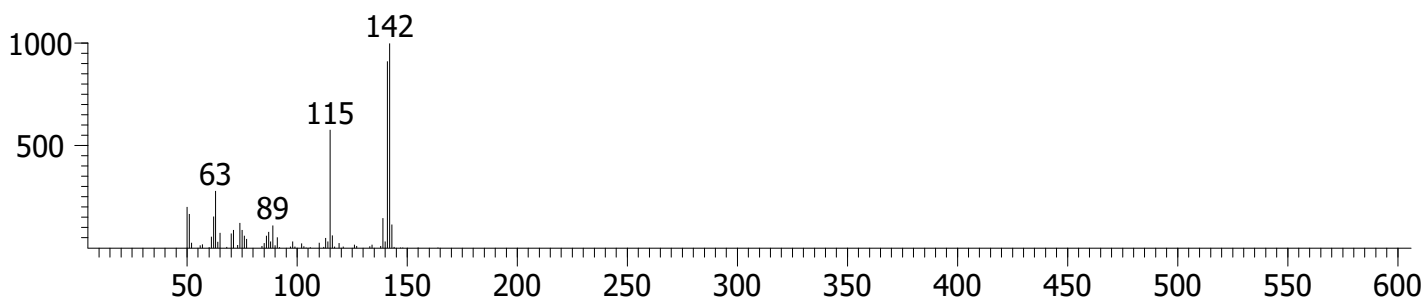

Library Hit - similarity 922, "Benzocycloheptatriene"

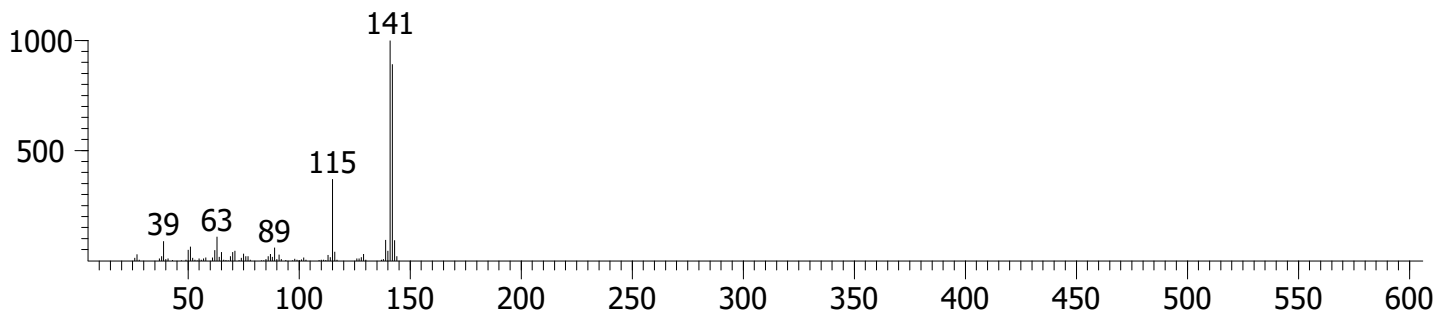

| Hit | Name                                    | Similarity | Probability | CAS       | Library | Formula | Weight |
|-----|-----------------------------------------|------------|-------------|-----------|---------|---------|--------|
| 1   | Benzocycloheptatriene                   | 922        | 3541        | 264-09-5  | mainlib | C11H10  | 142    |
| 2   | Bicyclo[4.4.1]undeca-1,3,5,7,9-pentaene | 920        | 3266        | 2443-46-1 | mainlib | C11H10  | 142    |
| 3   | Naphthalene, 1-methyl-                  | 895        | 996         | 90-12-0   | mainlib | C11H10  | 142    |
| 4   | Naphthalene, 2-methyl-                  | 893        | 919         | 91-57-6   | mainlib | C11H10  | 142    |
| 5   | 1H-Indene, 1-ethylidene-                | 892        | 883         | 2471-83-2 | mainlib | C11H10  | 142    |

## 2-Methoxy-4-vinylphenol

1st Dimension R.T. = 1029.19  
2nd Dimension R.T. = 1.835  
Quant Mass(es) = 150  
S/N = 802.48  
Area = 117540  
Height = 14559  
Similarity = 947

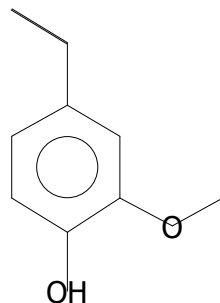

Peak Apex - sample "AerMBR A 092319 (20191119):1", peak 1138, at 1029.19 , 1.835 sec , sec (Spec # 8348 8)

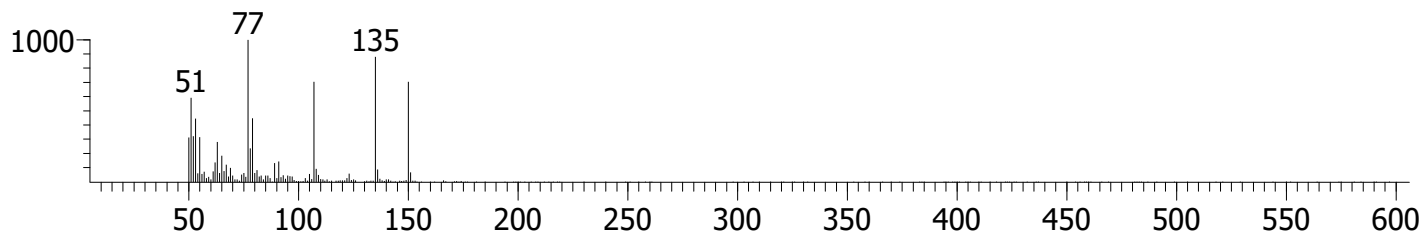

Peak True - sample "AerMBR A 092319 (20191119):1", peak 1138, at 1029.19 , 1.835 sec , sec (Spec # 8348 8)

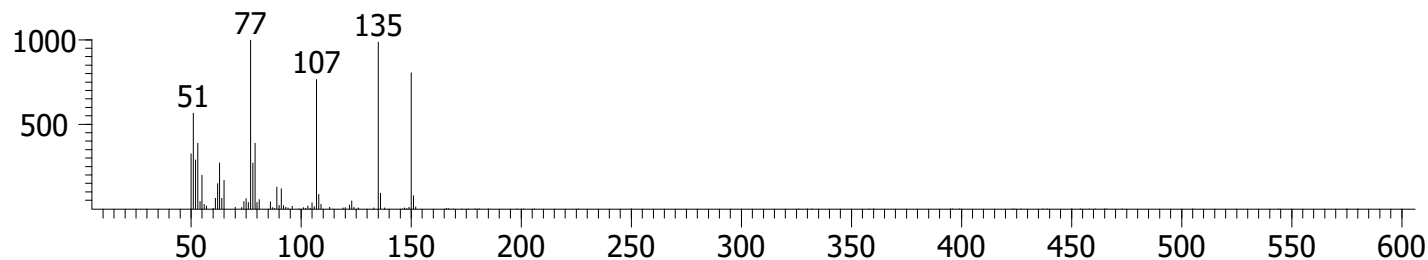

Library Hit - similarity 947, "2-Methoxy-4-vinylphenol"

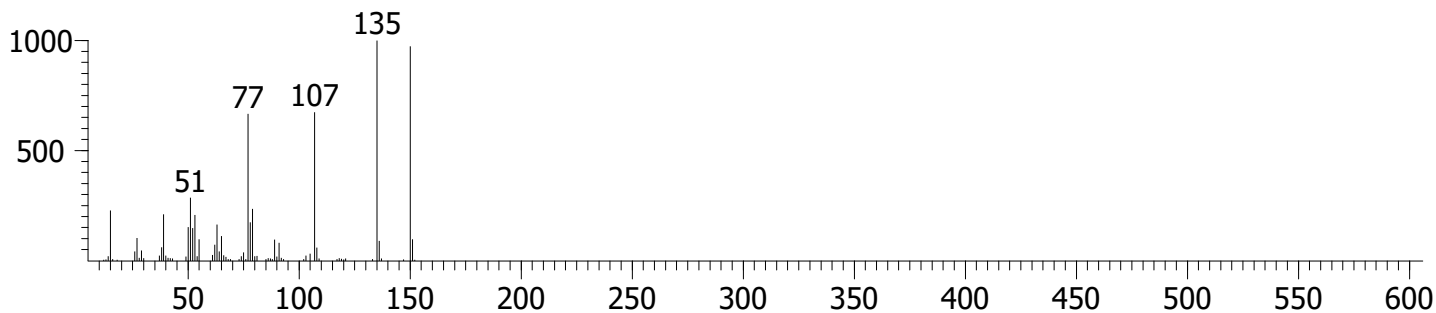

| Hit | Name                                    | Similarity | Probability | CAS       | Library | Formula                                       | Weight |
|-----|-----------------------------------------|------------|-------------|-----------|---------|-----------------------------------------------|--------|
| 1   | 2-Methoxy-4-vinylphenol                 | 947        | 8586        | 7786-61-0 | mainlib | C <sub>9</sub> H <sub>10</sub> O <sub>2</sub> | 150    |
| 2   | Phenol, 5-ethenyl-2-methoxy-            | 859        | 749         | 621-58-9  | mainlib | C <sub>9</sub> H <sub>10</sub> O <sub>2</sub> | 150    |
| 3   | 4-Hydroxy-2-methylacetophenone          | 826        | 196         | 875-59-2  | mainlib | C <sub>9</sub> H <sub>10</sub> O <sub>2</sub> | 150    |
| 4   | Ethanone, 1-(2-hydroxy-5-methylphenyl)- | 823        | 173         | 1450-72-2 | mainlib | C <sub>9</sub> H <sub>10</sub> O <sub>2</sub> | 150    |
| 5   | 4-Hydroxy-3-methylacetophenone          | 815        | 129         | 876-02-8  | mainlib | C <sub>9</sub> H <sub>10</sub> O <sub>2</sub> | 150    |

## Triacetin

1st Dimension R.T. = 1057.17

2nd Dimension R.T. = 1.775

Quant Mass(es) = 103

S/N = 3649.7

Area = 677014

Height = 76930

Similarity = 958

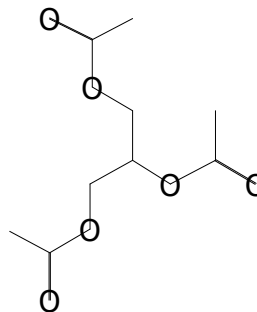

Peak Apex - sample "AerMBR A 092319 (20191119):1", peak 1198, at 1057.17 , 1.775 sec , sec (Spec # 87719)

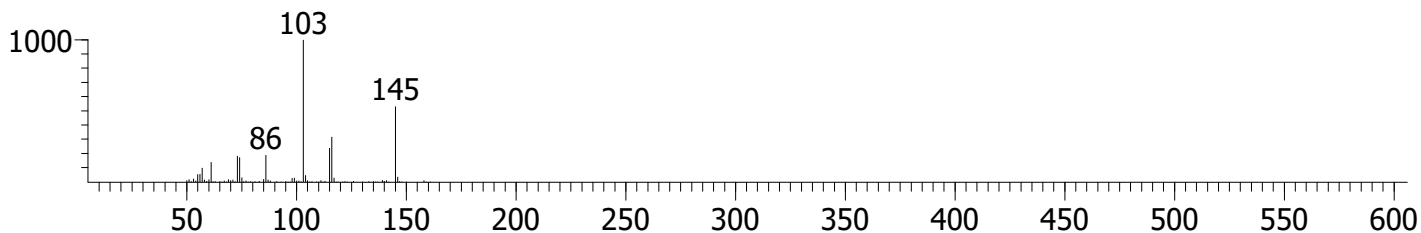

Peak True - sample "AerMBR A 092319 (20191119):1", peak 1198, at 1057.17 , 1.775 sec , sec (Spec # 87719)

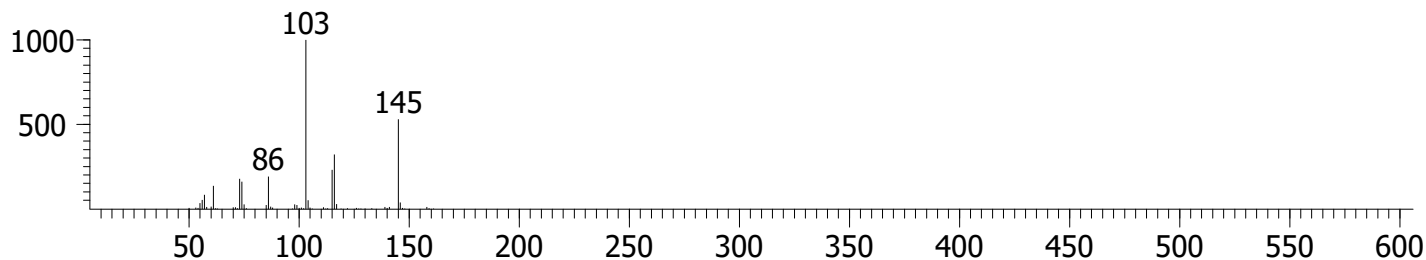

Library Hit - similarity 958, "Triacetin"

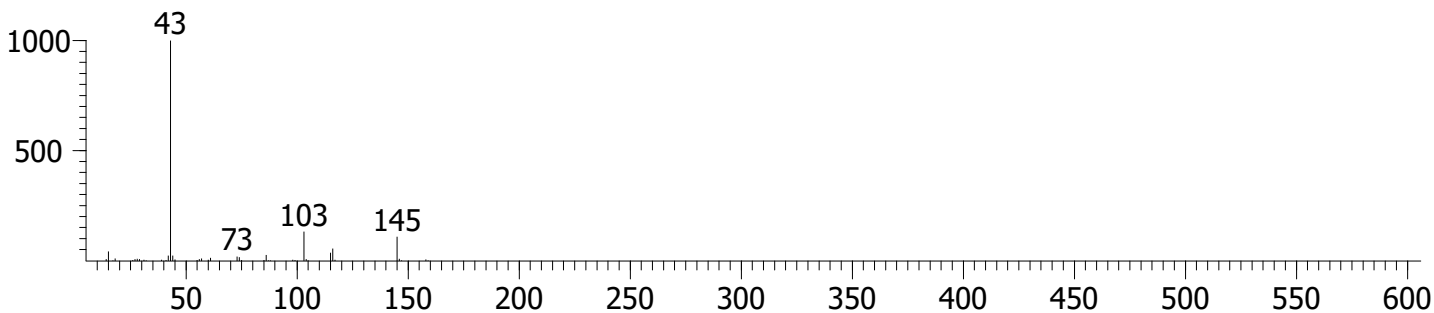

| Hit | Name                                               | Similarity | Probability | CAS        | Library | Formula   | Weight |
|-----|----------------------------------------------------|------------|-------------|------------|---------|-----------|--------|
| 1   | Triacetin                                          | 958        | 4950        | 102-76-1   | mainlib | C9H14O6   | 218    |
| 2   | Glycerol 1,2-diacetate                             | 953        | 3989        | 102-62-5   | mainlib | C7H12O5   | 176    |
| 3   | 1,3-Diacetin                                       | 918        | 1001        | 0-00-0     | mainlib | C7H12O5   | 176    |
| 4   | ̑-D-Glucopyranose, 2-deoxy-2-fluoro-, tetraacetate | 747        | 21          | 31077-89-1 | mainlib | C14H19FO9 | 350    |
| 5   | 1,2,3,4-butanetetrol, tetraacetate                 | 741        | 17          | 73977-54-5 | mainlib | C12H18O8  | 290    |

# n-Decanoic acid

1st Dimension R.T. = 1081.66

2nd Dimension R.T. = 1.419

Quant Mass(es) = 60

S/N = 1378.9

Area = 360398

Height = 53518

Similarity = 866

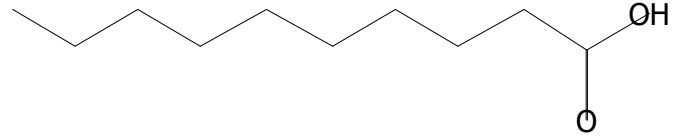

Peak Apex - sample "AerMBR A 092319 (20191119):1", peak 1242, at 1081.66 , 1.419 sec , sec (Spec # 9137 5)

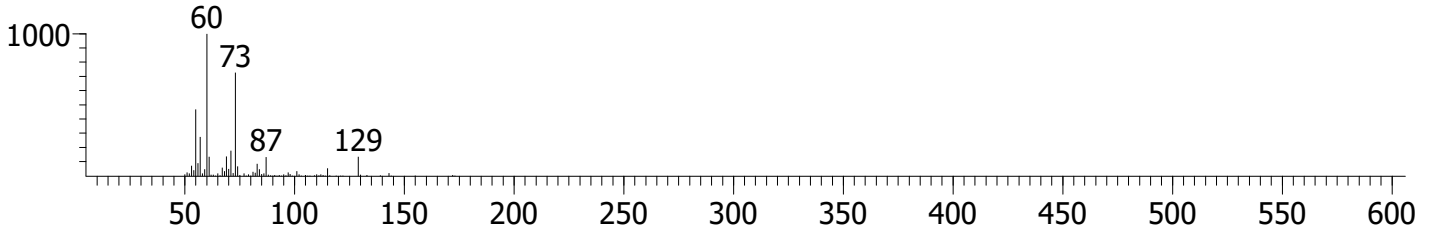

Peak True - sample "AerMBR A 092319 (20191119):1", peak 1242, at 1081.66 , 1.419 sec , sec (Spec # 9137 5)

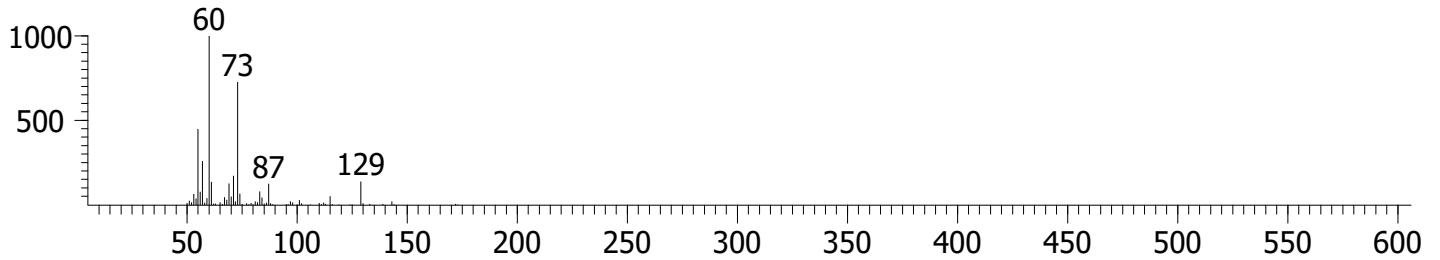

Library Hit - similarity 866, "n-Decanoic acid"

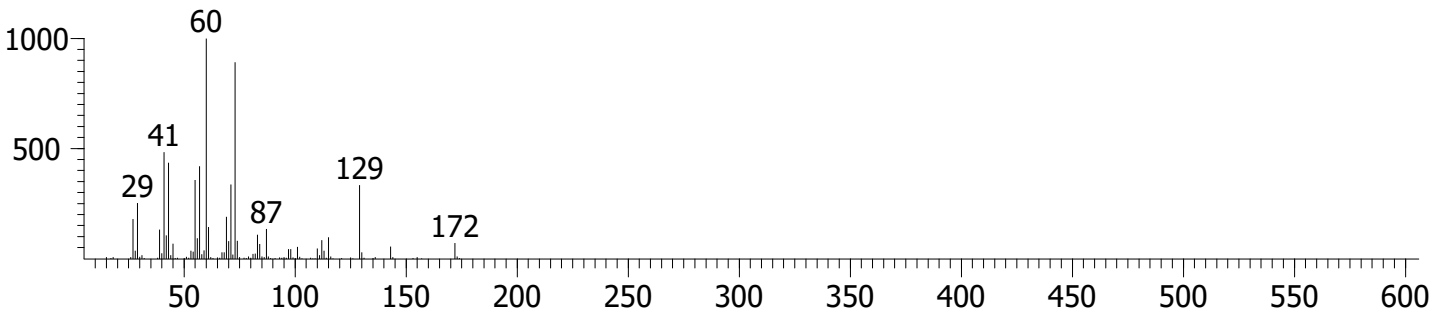

| Hit | Name                  | Similarity | Probability | CAS       | Library | Formula  | Weight |
|-----|-----------------------|------------|-------------|-----------|---------|----------|--------|
| 1   | n-Decanoic acid       | 866        | 6563        | 334-48-5  | mainlib | C10H20O2 | 172    |
| 2   | Nonanoic acid         | 813        | 1298        | 112-05-0  | mainlib | C9H18O2  | 158    |
| 3   | Heptanoic acid        | 780        | 339         | 111-14-8  | mainlib | C7H14O2  | 130    |
| 4   | n-Hexadecanoic acid   | 780        | 339         | 57-10-3   | mainlib | C16H32O2 | 256    |
| 5   | 8-Methylnonanoic acid | 776        | 287         | 5963-14-4 | mainlib | C10H20O2 | 172    |

## 1(3H)-Isobenzofuranone

1st Dimension R.T. = 1088.65

2nd Dimension R.T. = 2.376

Quant Mass(es) = 105

S/N = 244.19

Area = 72519

Height = 7545.4

Similarity = 871

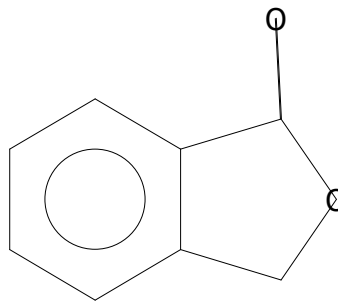

Peak Apex - sample "AerMBR A 092319 (20191119):1", peak 1270, at 1088.65 , 2.376 sec , sec (Spec # 92580)

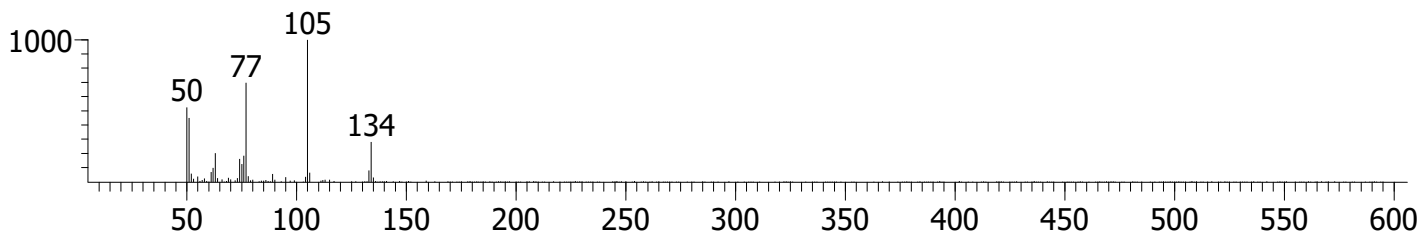

Peak True - sample "AerMBR A 092319 (20191119):1", peak 1270, at 1088.65 , 2.376 sec , sec (Spec # 92580)

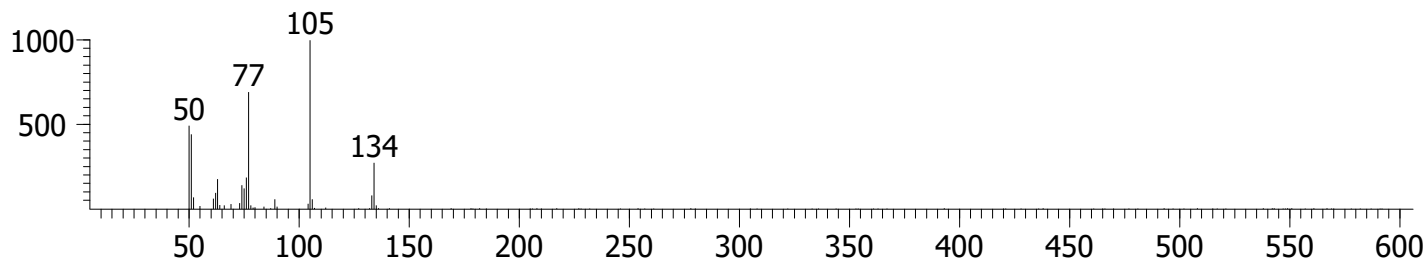

Library Hit - similarity 871, "1(3H)-Isobenzofuranone"

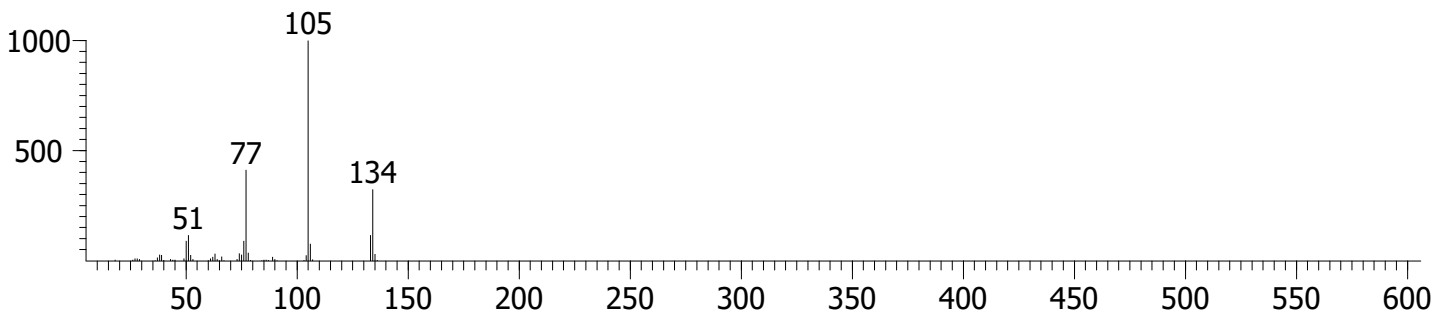

| Hit | Name                                           | Similarity | Probability | CAS        | Library | Formula    | Weight |
|-----|------------------------------------------------|------------|-------------|------------|---------|------------|--------|
| 1   | 1(3H)-Isobenzofuranone                         | 871        | 3931        | 87-41-2    | mainlib | C8H6O2     | 134    |
| 2   | Benzoic acid, 2-(hydroxymethyl)-               | 868        | 3473        | 612-20-4   | mainlib | C8H8O3     | 152    |
| 3   | N-[5-(p-Tolyl)-1,3,4-thiadiazol-2-yl]benzamide | 789        | 395         | 19948-85-7 | mainlib | C16H13N3OS | 295    |
| 4   | 1,2,3-Benzotriazole-1-benzoate                 | 782        | 303         | 54769-36-7 | mainlib | C13H9N3O2  | 239    |
| 5   | Benzofurazan-5-carbohydrazide, N2-benzoyl-     | 759        | 110         | 0-00-0     | mainlib | C14H10N4O3 | 282    |



## Benzaldehyde, 4-hydroxy-

1st Dimension R.T. = 1109.64

2nd Dimension R.T. = 2.046

Quant Mass(es) = 122

S/N = 217.85

Area = 86409

Height = 9665.6

Similarity = 860

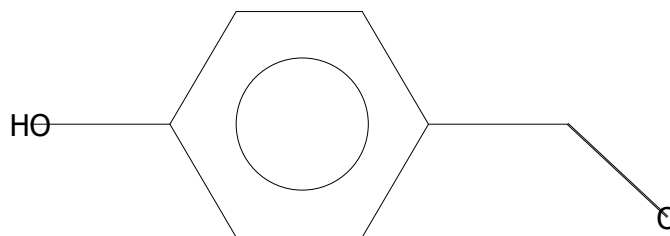

Peak Apex - sample "AerMBR A 092319 (20191119):1", peak 1309, at 1109.64 , 2.046 sec , sec (Spec # 95710)

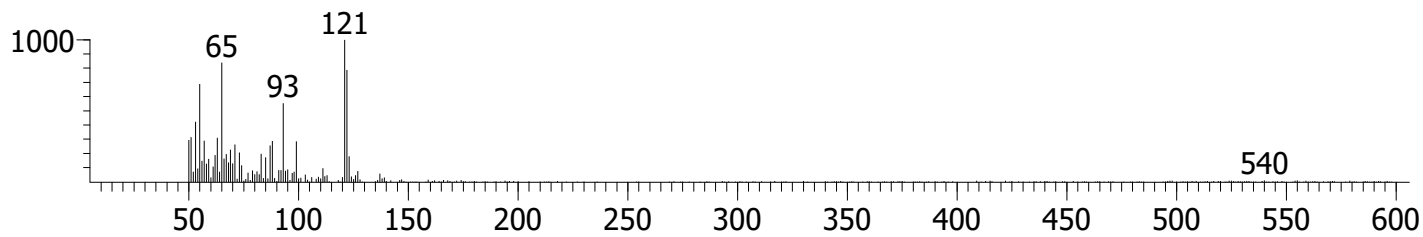

Peak True - sample "AerMBR A 092319 (20191119):1", peak 1309, at 1109.64 , 2.046 sec , sec (Spec # 95710)

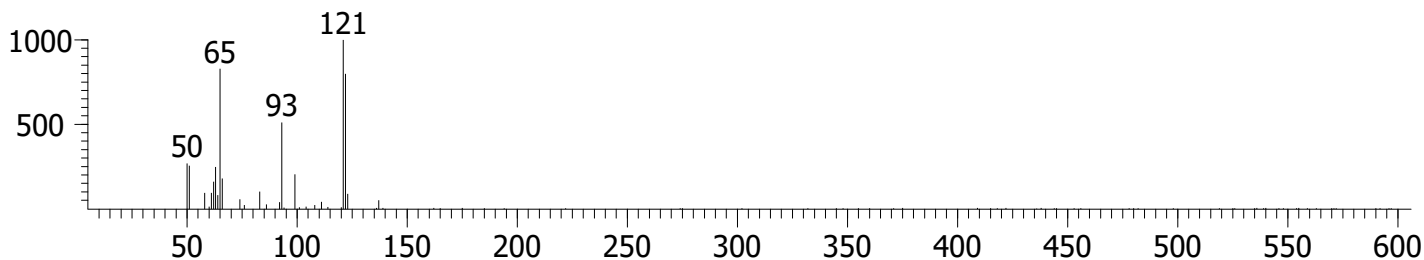

Library Hit - similarity 860, "Benzaldehyde, 4-hydroxy-"

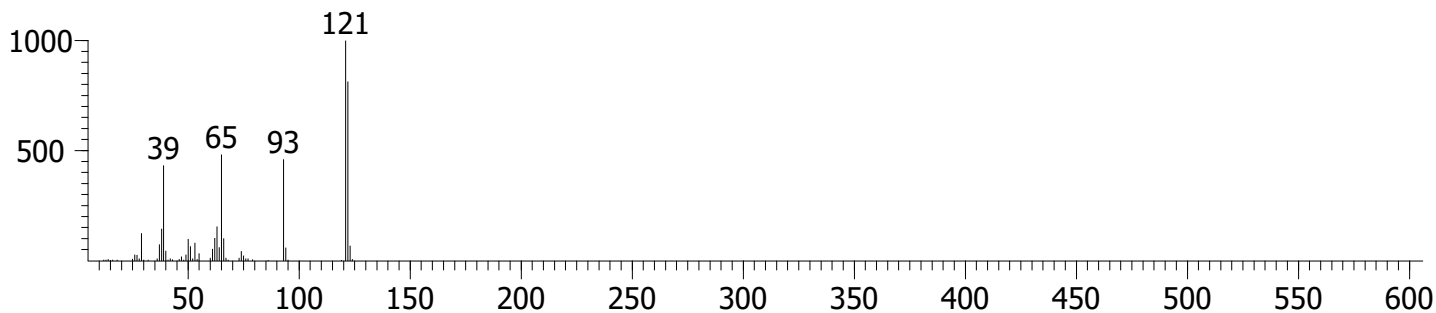

| Hit | Name                                            | Similarity | Probability | CAS        | Library | Formula   | Weight |
|-----|-------------------------------------------------|------------|-------------|------------|---------|-----------|--------|
| 1   | Benzaldehyde, 4-hydroxy-                        | 860        | 6081        | 123-08-0   | mainlib | C7H6O2    | 122    |
| 2   | Propanoic acid, 3-chloro-, 4-formylphenyl ester | 832        | 1756        | 0-00-0     | mainlib | C10H9ClO3 | 212    |
| 3   | Benzaldehyde, 3-hydroxy-                        | 825        | 1345        | 100-83-4   | mainlib | C7H6O2    | 122    |
| 4   | 4-Acetoxybenzaldehyde                           | 791        | 344         | 878-00-2   | mainlib | C9H8O3    | 164    |
| 5   | 3-Acetoxybenzaldehyde                           | 772        | 167         | 34231-78-2 | mainlib | C9H8O3    | 164    |

### 3-Tetradecene, (E)-

1st Dimension R.T. = 1116.64

2nd Dimension R.T. = 1.188

Quant Mass(es) = 70

S/N = 124.02

Area = 18148

Height = 2577.3

Similarity = 918

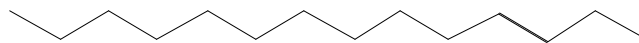

Peak Apex - sample "AerMBR A 092319 (20191119):1", peak 1318, at 1116.64 , 1.188 sec , sec (Spec # 9664 0)

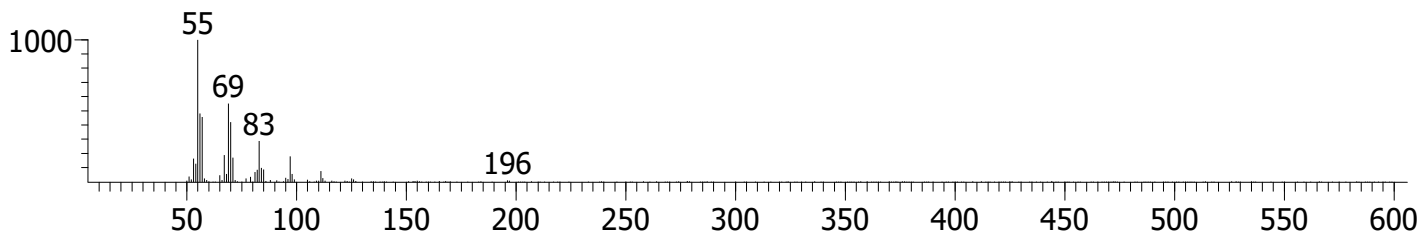

Peak True - sample "AerMBR A 092319 (20191119):1", peak 1318, at 1116.64 , 1.188 sec , sec (Spec # 9664 0)

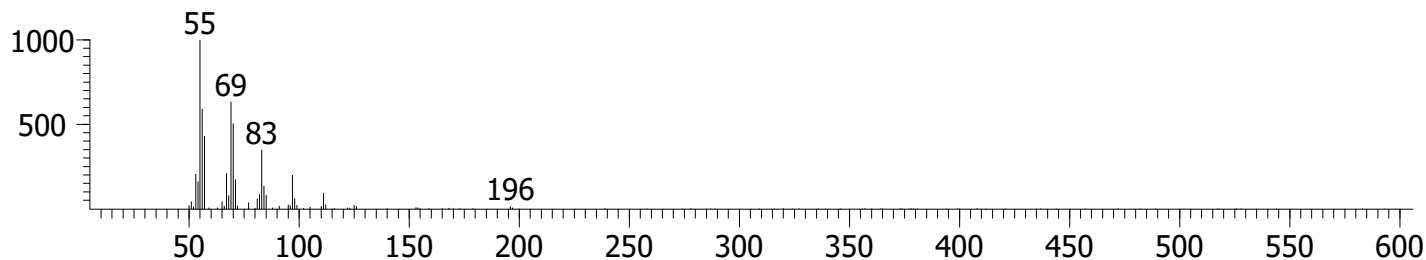

Library Hit - similarity 918, "3-Tetradecene, (E)-"

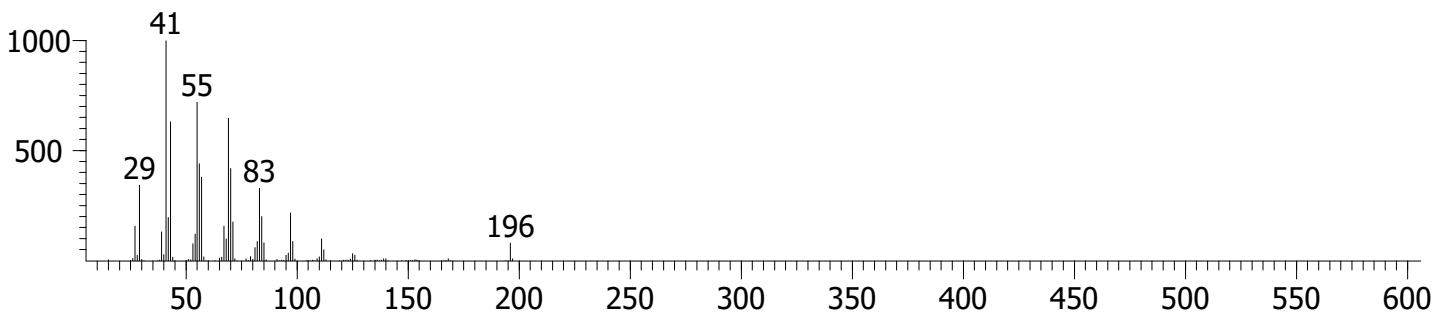

| Hit | Name                | Similarity | Probability | CAS        | Library | Formula | Weight |
|-----|---------------------|------------|-------------|------------|---------|---------|--------|
| 1   | 3-Tetradecene, (E)- | 918        | 481         | 41446-68-8 | mainlib | C14H28  | 196    |
| 2   | 7-Hexadecene, (Z)-  | 912        | 378         | 35507-09-6 | mainlib | C16H32  | 224    |
| 3   | 5-Tetradecene, (E)- | 910        | 348         | 41446-66-6 | mainlib | C14H28  | 196    |
| 4   | 3-Tridecene, (E)-   | 909        | 335         | 41446-57-5 | mainlib | C13H26  | 182    |
| 5   | 3-Tetradecene, (Z)- | 909        | 335         | 41446-67-7 | mainlib | C14H28  | 196    |

## 4-(2-Methoxyethyl)phenol

1st Dimension R.T. = 1123.63  
2nd Dimension R.T. = 1.914  
Quant Mass(es) = 107  
S/N = 189.25  
Area = 36157  
Height = 4201.8  
Similarity = 797

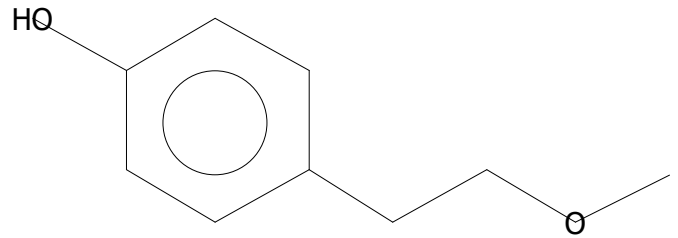

Peak Apex - sample "AerMBR A 092319 (20191119):1", peak 1345, at 1123.63 , 1.914 sec , sec (Spec # 97810)

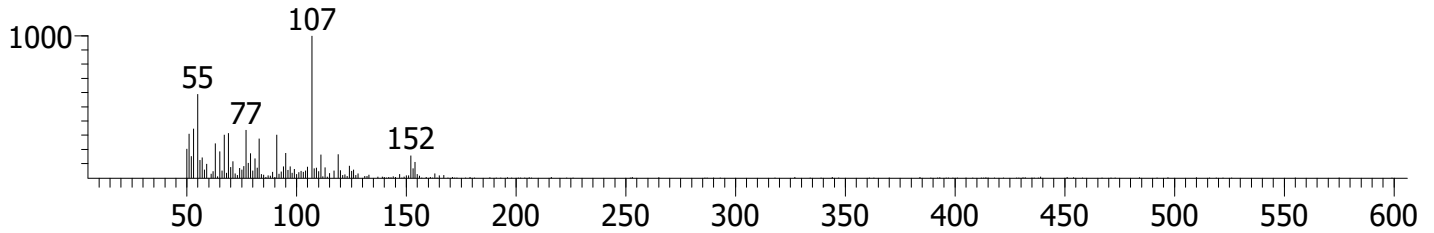

Peak True - sample "AerMBR A 092319 (20191119):1", peak 1345, at 1123.63 , 1.914 sec , sec (Spec # 97810)

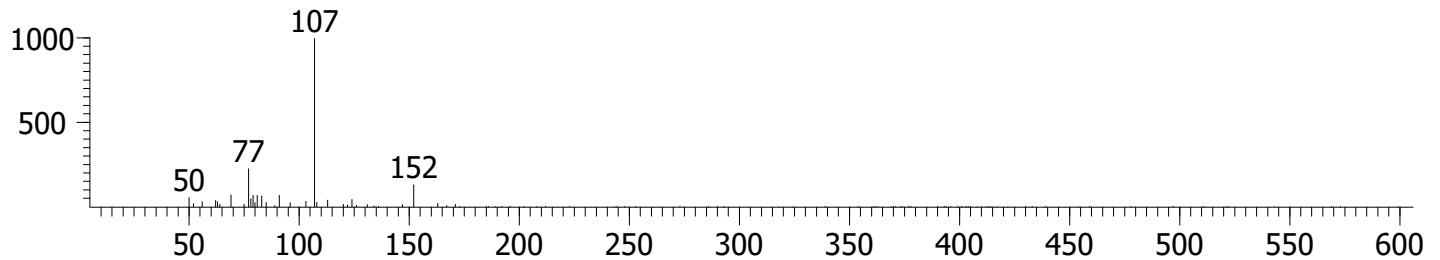

Library Hit - similarity 797, "4-(2-Methoxyethyl)phenol"

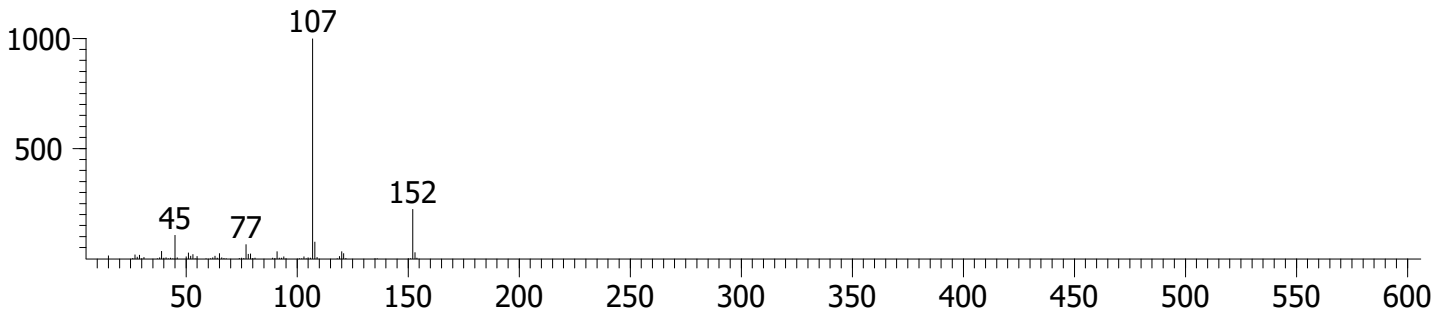

| Hit | Name                                                             | Similarity | Probability | CAS         | Library | Formula   | Weight |
|-----|------------------------------------------------------------------|------------|-------------|-------------|---------|-----------|--------|
| 1   | 4-(2-Methoxyethyl)phenol                                         | 797        | 5646        | 56718-71-9  | mainlib | C9H12O2   | 152    |
| 2   | 2-Amino-3-(4-hydroxyphenyl)-propanoic acid                       | 758        | 1331        | 556-03-6    | mainlib | C9H11NO3  | 181    |
| 3   | Benzeneacetic acid, 4-hydroxy-                                   | 751        | 1019        | 156-38-7    | mainlib | C8H8O3    | 152    |
| 4   | Pentanoic acid, 5-(4-methylphenylamino)-5-oxo-, 2-propynyl ester | 720        | 278         | 300726-47-0 | mainlib | C15H17NO3 | 259    |
| 5   | d-Tyrosine                                                       | 716        | 234         | 556-02-5    | mainlib | C9H11NO3  | 181    |

## Chloroxylenol

1st Dimension R.T. = 1127.13  
2nd Dimension R.T. = 1.828  
Quant Mass(es) = 156  
S/N = 315.47  
Area = 42301  
Height = 5367.4  
Similarity = 949

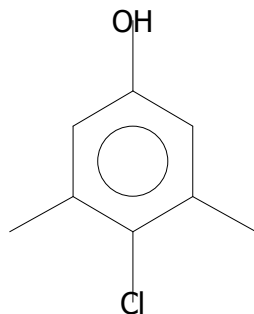

Peak Apex - sample "AerMBR A 092319 (20191119):1", peak 1350, at 1127.13 , 1.828 sec , sec (Spec # 98327)

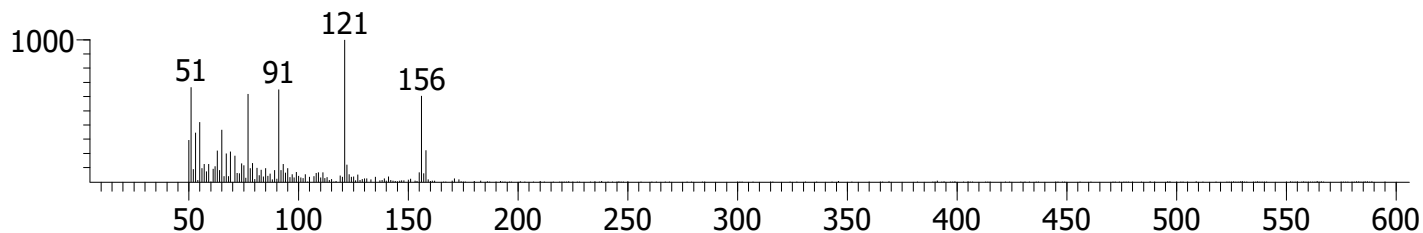

Peak True - sample "AerMBR A 092319 (20191119):1", peak 1350, at 1127.13 , 1.828 sec , sec (Spec # 98327)

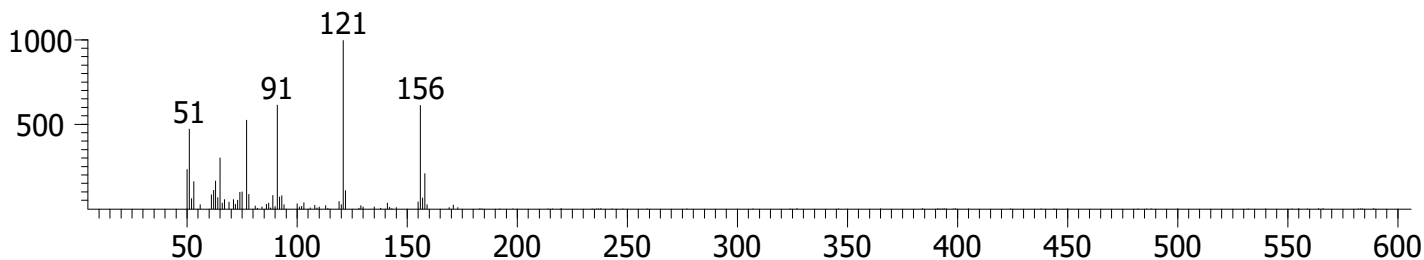

Library Hit - similarity 949, "Chloroxylenol"

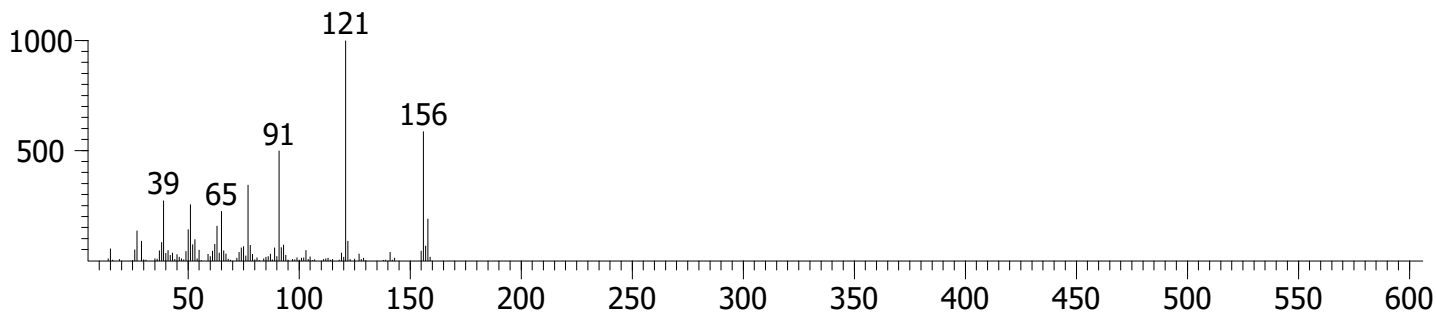

| Hit | Name                                 | Similarity | Probability | CAS       | Library | Formula | Weight |
|-----|--------------------------------------|------------|-------------|-----------|---------|---------|--------|
| 1   | Chloroxylenol                        | 949        | 8017        | 88-04-0   | mainlib | C8H9ClO | 156    |
| 2   | 4-Chloro-2,6-dimethylphenol          | 888        | 1396        | 1123-63-3 | mainlib | C8H9ClO | 156    |
| 3   | Benzene, 1-(chloromethyl)-2-methoxy- | 857        | 380         | 7035-02-1 | mainlib | C8H9ClO | 156    |
| 4   | 2-Chloro-4,5-dimethylphenol          | 819        | 91          | 1124-04-5 | mainlib | C8H9ClO | 156    |
| 5   | Benzene, 1-(chloromethyl)-3-methoxy- | 807        | 60          | 824-98-6  | mainlib | C8H9ClO | 156    |

## 1H-Indole, 2-methyl-

1st Dimension R.T. = 1134.13  
2nd Dimension R.T. = 2.152  
Quant Mass(es) = 130  
S/N = 277.07  
Area = 35253  
Height = 4133.9  
Similarity = 862

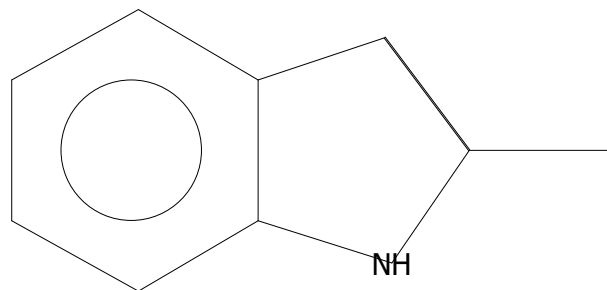

Peak Apex - sample "AerMBR A 092319 (20191119):1", peak 1369, at 1134.13 , 2.152 sec , sec (Spec # 9943 6)

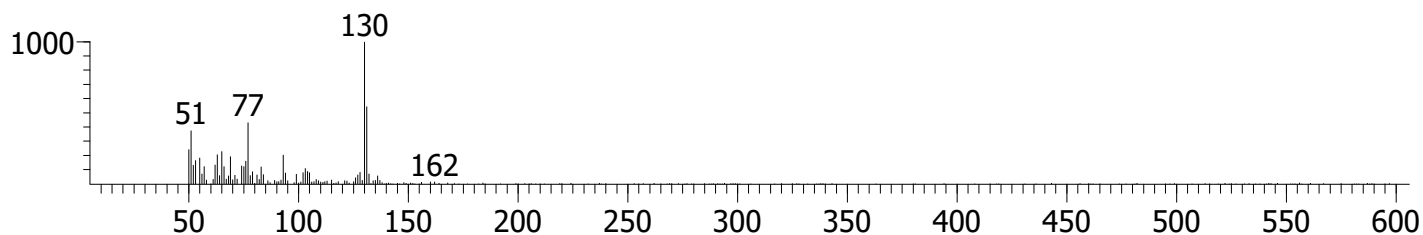

Peak True - sample "AerMBR A 092319 (20191119):1", peak 1369, at 1134.13 , 2.152 sec , sec (Spec # 9943 6)

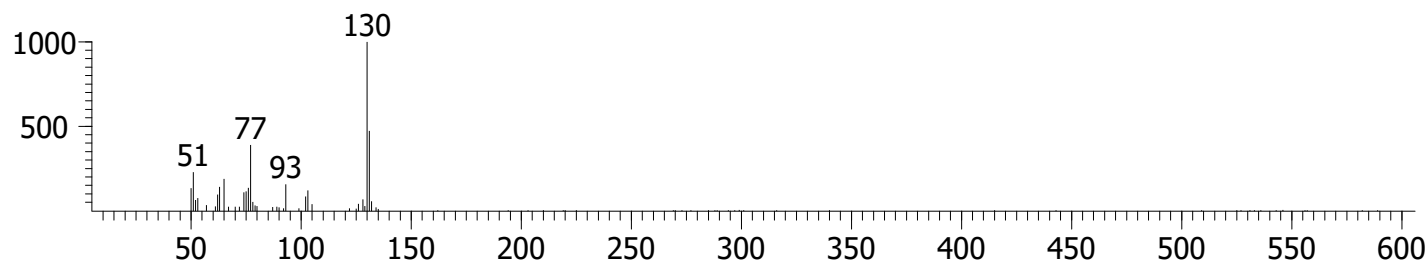

Library Hit - similarity 862, "1H-Indole, 2-methyl-"

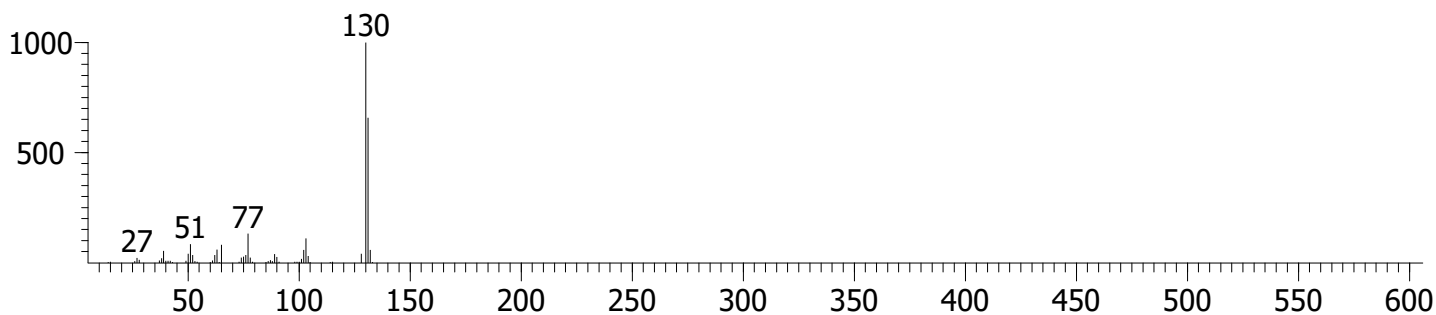

| Hit | Name                                          | Similarity | Probability | CAS      | Library | Formula  | Weight |
|-----|-----------------------------------------------|------------|-------------|----------|---------|----------|--------|
| 1   | 1H-Indole, 2-methyl-                          | 862        | 3008        | 95-20-5  | mainlib | C9H9N    | 131    |
| 2   | Indole, 3-methyl-                             | 839        | 1098        | 83-34-1  | mainlib | C9H9N    | 131    |
| 3   | Indole, 3-(2-aminopropyl)-, monohydrochloride | 838        | 1056        | 879-36-7 | mainlib | C11H14N2 | 174    |
| 4   | 1H-Indole-3-ethanamine, à-methyl-             | 824        | 661         | 299-26-3 | mainlib | C11H14N2 | 174    |
| 5   | 1H-Indole, 7-methyl-                          | 810        | 413         | 933-67-5 | mainlib | C9H9N    | 131    |

# Phenol, 4-(1,1-dimethylpropyl)-

1st Dimension R.T. = 1137.62  
2nd Dimension R.T. = 1.723  
Quant Mass(es) = 135  
S/N = 5818.9  
Area = 1115458  
Height = 141369  
Similarity = 881

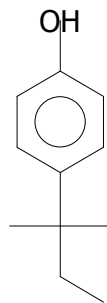

Peak Apex - sample "AerMBR A 092319 (20191119):1", peak 1372, at 1137.62 , 1.723 sec , sec (Spec # 9990 1)

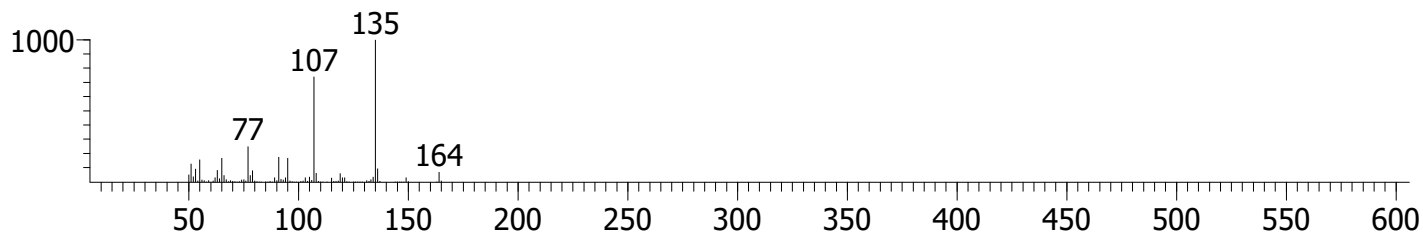

Peak True - sample "AerMBR A 092319 (20191119):1", peak 1372, at 1137.62 , 1.723 sec , sec (Spec # 9990 1)

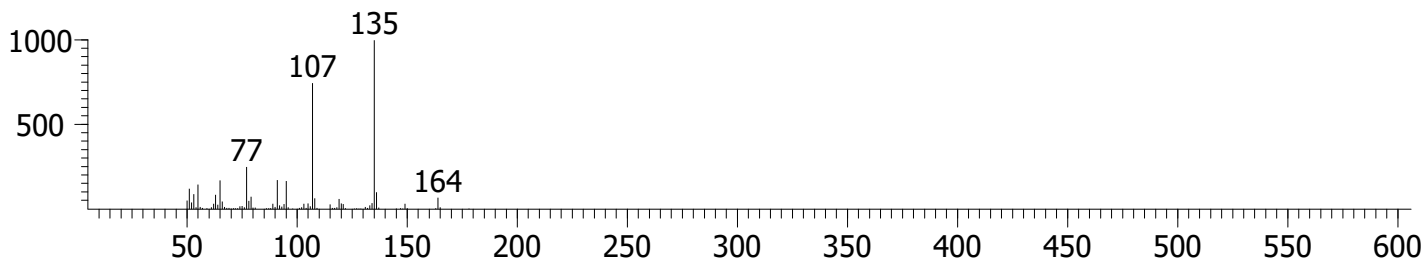

Library Hit - similarity 881, "Phenol, 4-(1,1-dimethylpropyl)-"

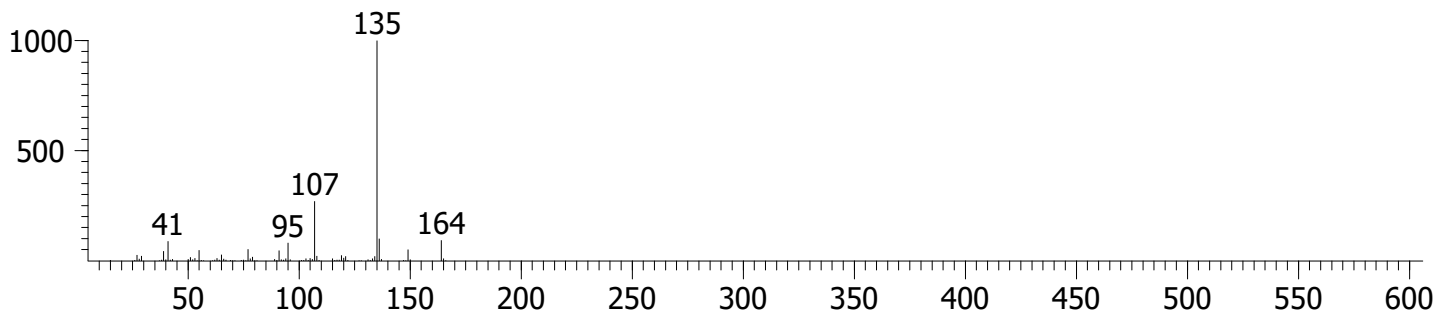

| Hit | Name                                 | Similarity | Probability | CAS     | Library | Formula                                                       | Weight |
|-----|--------------------------------------|------------|-------------|---------|---------|---------------------------------------------------------------|--------|
| 1   | Phenol, 4-(1,1-dimethylpropyl)-      | 881        | 5921        | 80-46-6 | mainlib | C <sub>11</sub> H <sub>16</sub> O                             | 164    |
| 2   | Phenol, p-tert-butyl-                | 810        | 843         | 98-54-4 | mainlib | C <sub>10</sub> H <sub>14</sub> O                             | 150    |
| 3   | Hexestrol, O-trifluoroacetyl-        | 809        | 810         | 0-00-0  | mainlib | C <sub>20</sub> H <sub>21</sub> F <sub>3</sub> O <sub>3</sub> | 366    |
| 4   | 4-(1,1-Dimethylpropyl)phenyl acetate | 806        | 716         | 0-00-0  | mainlib | C <sub>13</sub> H <sub>18</sub> O <sub>2</sub>                | 206    |
| 5   | Hexestrol, O-acetyl-                 | 767        | 168         | 0-00-0  | mainlib | C <sub>20</sub> H <sub>24</sub> O <sub>3</sub>                | 312    |

# Ethanone, 1-(3-hydroxyphenyl)-

1st Dimension R.T. = 1148.12  
2nd Dimension R.T. = 2.046  
Quant Mass(es) = 121  
S/N = 138.45  
Area = 42410  
Height = 4877.8  
Similarity = 910

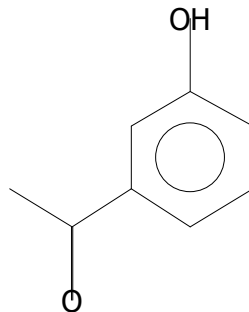

Peak Apex - sample "AerMBR A 092319 (20191119):1", peak 1393, at 1148.12 , 2.046 sec , sec (Spec # 1015 40)

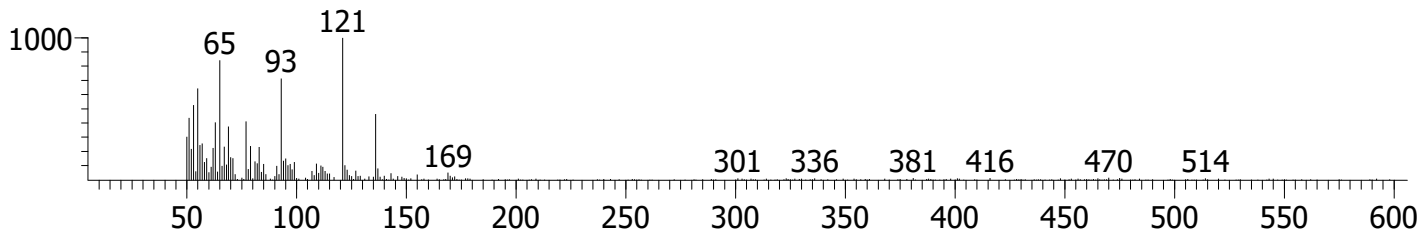

Peak True - sample "AerMBR A 092319 (20191119):1", peak 1393, at 1148.12 , 2.046 sec , sec (Spec # 1015 40)

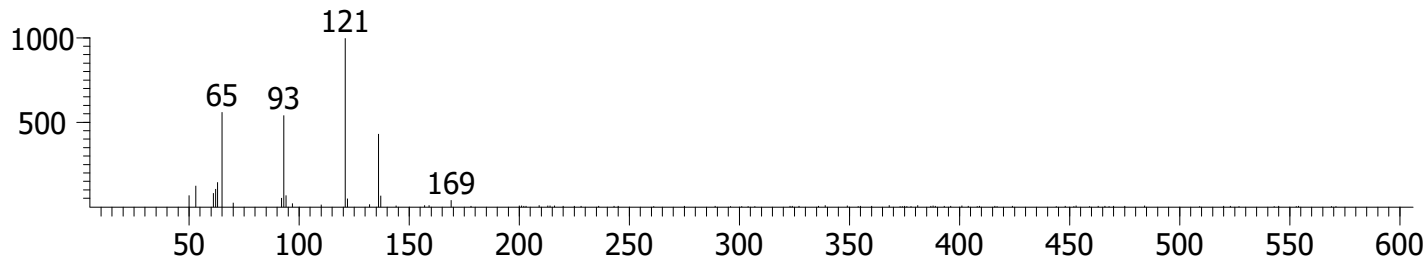

Library Hit - similarity 910, "Ethanone, 1-(3-hydroxyphenyl)-"

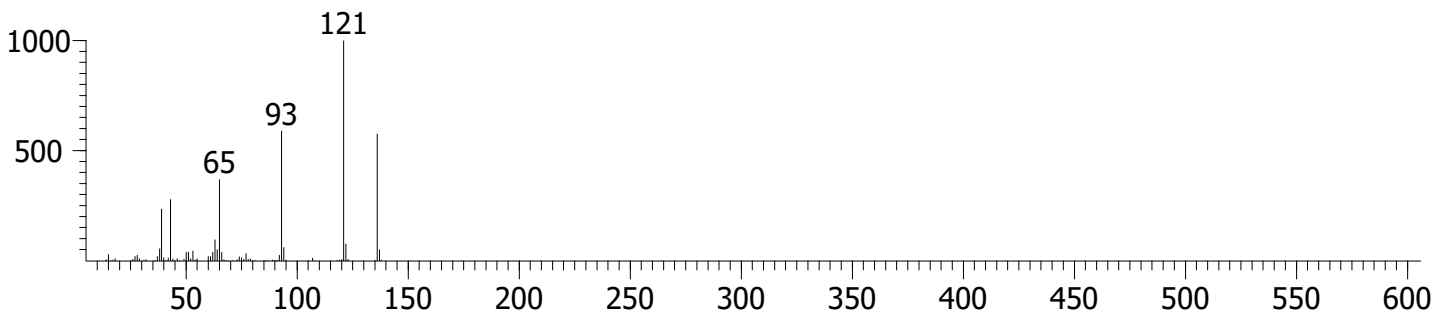

| Hit | Name                                      | Similarity | Probability | CAS        | Library | Formula                                          | Weight |
|-----|-------------------------------------------|------------|-------------|------------|---------|--------------------------------------------------|--------|
| 1   | Ethanone, 1-(3-hydroxyphenyl)-            | 910        | 6614        | 121-71-1   | mainlib | C <sub>8</sub> H <sub>8</sub> O <sub>2</sub>     | 136    |
| 2   | Ethanone, 1-(2-hydroxyphenyl)-            | 870        | 1534        | 118-93-4   | mainlib | C <sub>8</sub> H <sub>8</sub> O <sub>2</sub>     | 136    |
| 3   | Acetophenone, 4'-hydroxy-                 | 845        | 468         | 99-93-4    | mainlib | C <sub>8</sub> H <sub>8</sub> O <sub>2</sub>     | 136    |
| 4   | 1-Butanone, 4-chloro-1-(4-hydroxyphenyl)- | 838        | 358         | 7150-55-2  | mainlib | C <sub>10</sub> H <sub>11</sub> ClO <sub>2</sub> | 198    |
| 5   | Methanol, (4-carboxymethoxy)benzoyl-      | 824        | 224         | 80099-44-1 | mainlib | C <sub>10</sub> H <sub>10</sub> O <sub>5</sub>   | 210    |

## 1,1'-Biphenyl, 4-methyl-

1st Dimension R.T. = 1186.6

2nd Dimension R.T. = 1.921

Quant Mass(es) = 167

S/N = 643.69

Area = 50383

Height = 6363.9

Similarity = 828

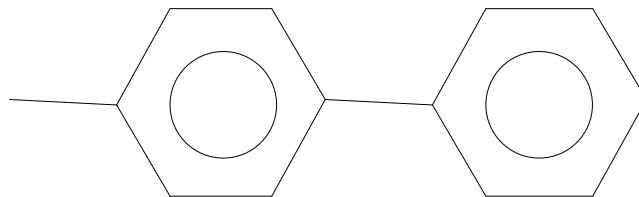

Peak Apex - sample "AerMBR A 092319 (20191119):1", peak 1471, at 1186.6 , 1.921 sec , sec (Spec # 10735 1)

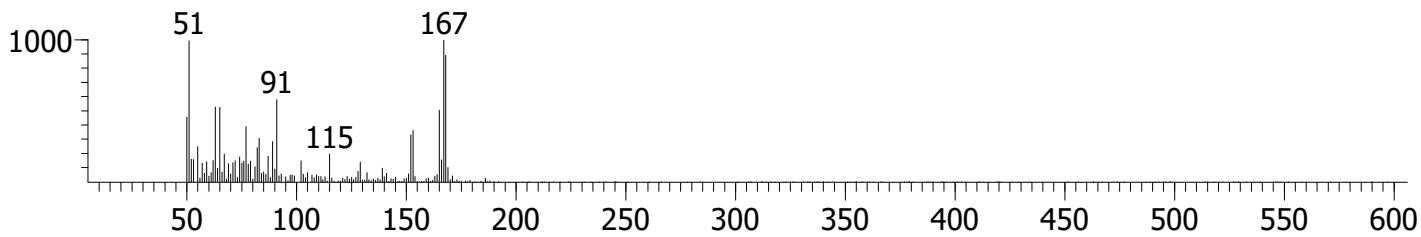

Peak True - sample "AerMBR A 092319 (20191119):1", peak 1471, at 1186.6 , 1.921 sec , sec (Spec # 10735 1)

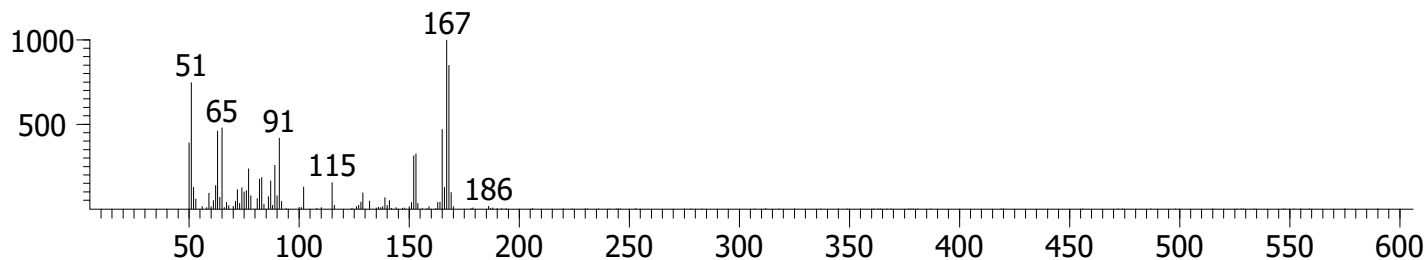

Library Hit - similarity 828, "1,1'-Biphenyl, 4-methyl-"

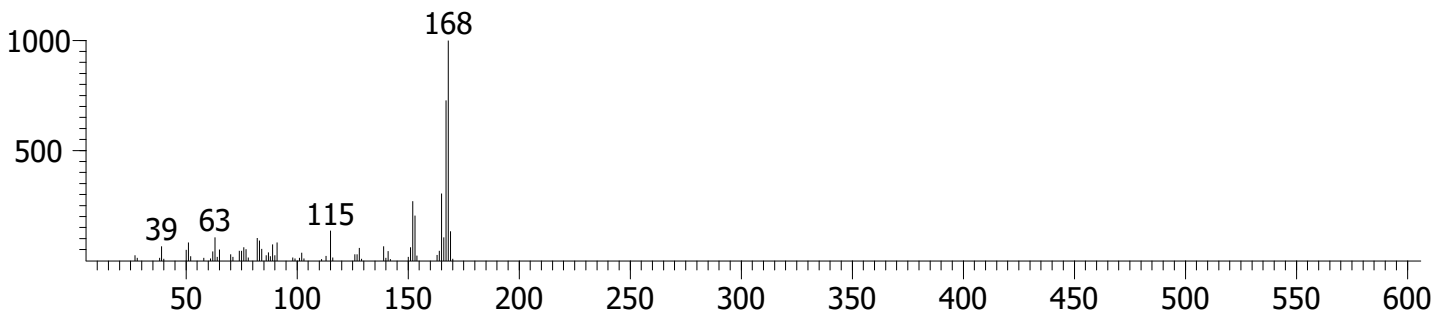

| Hit | Name                         | Similarity | Probability | CAS       | Library | Formula | Weight |
|-----|------------------------------|------------|-------------|-----------|---------|---------|--------|
| 1   | 1,1'-Biphenyl, 4-methyl-     | 828        | 3000        | 644-08-6  | mainlib | C13H12  | 168    |
| 2   | 1,1'-Biphenyl, 2-methyl-     | 821        | 2298        | 643-58-3  | mainlib | C13H12  | 168    |
| 3   | Diphenylmethane              | 812        | 1668        | 101-81-5  | mainlib | C13H12  | 168    |
| 4   | 2-Allylnaphthalene           | 781        | 454         | 2489-87-4 | mainlib | C13H12  | 168    |
| 5   | Naphthalene, 1-(2-propenyl)- | 780        | 437         | 2489-86-3 | mainlib | C13H12  | 168    |



2-Propenoic acid, 3-(2-hydroxyphenyl)-,  
(E)-

1st Dimension R.T. = 1204.09  
 2nd Dimension R.T. = 2.363  
 Quant Mass(es) = 118  
 S/N = 62.148  
 Area = 12600  
 Height = 1203.2  
 Similarity = 761

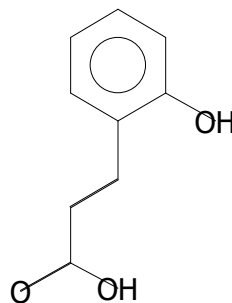

Peak Apex - sample "AerMBR A 092319 (20191119):1", peak 1506, at 1204.09 , 2.363 sec , sec (Spec # 1100 68)

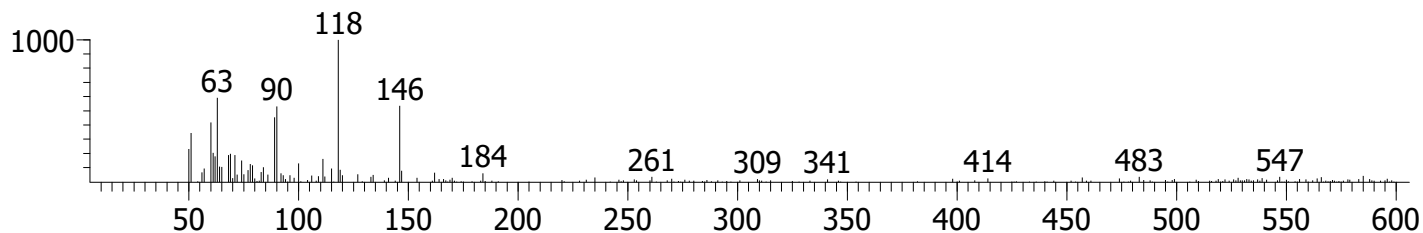

Peak True - sample "AerMBR A 092319 (20191119):1", peak 1506, at 1204.09 , 2.363 sec , sec (Spec # 1100 68)

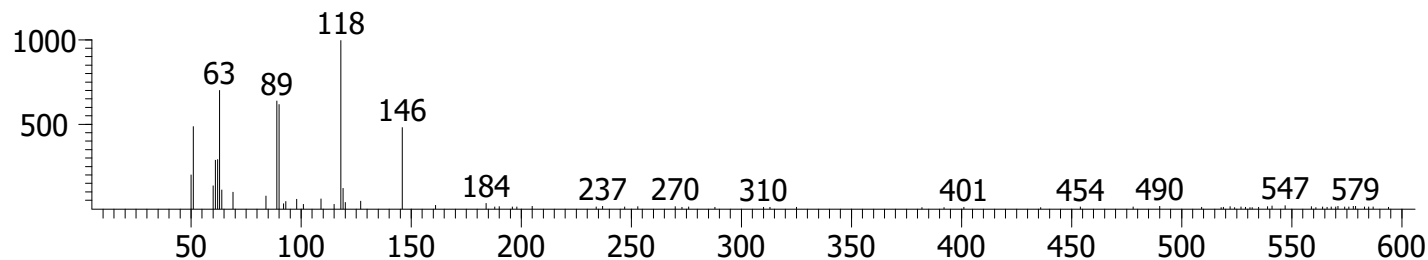

Library Hit - similarity 761, "2-Propenoic acid, 3-(2-hydroxyphenyl)-, (E)-"

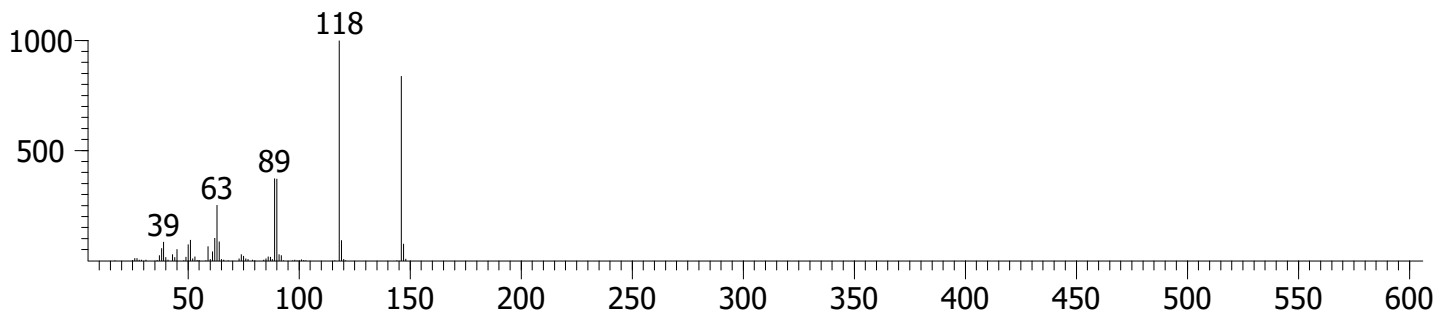

| Hit | Name                                         | Similarity | Probability | CAS        | Library | Formula   | Weight |
|-----|----------------------------------------------|------------|-------------|------------|---------|-----------|--------|
| 1   | 2-Propenoic acid, 3-(2-hydroxyphenyl)-, (E)- | 761        | 2829        | 614-60-8   | mainlib | C9H8O3    | 164    |
| 2   | 2H-1-Benzopyran-3-carboxaldehyde, 2-oxo-     | 752        | 2053        | 95306-75-5 | mainlib | C10H6O3   | 174    |
| 3   | 2-Aminoethyl 2-oxo-2H-chromene-3-carboxylate | 749        | 1814        | 0-00-0     | mainlib | C12H11NO4 | 233    |
| 4   | 2-Propenoic acid, 3-(2-hydroxyphenyl)-       | 743        | 1426        | 583-17-5   | mainlib | C9H8O3    | 164    |
| 5   | 1(2H)-Naphthalenone, 3,4-dihydro-            | 704        | 336         | 529-34-0   | mainlib | C10H10O   | 146    |

## Naphthalene, 2-methoxy-

1st Dimension R.T. = 1214.58  
2nd Dimension R.T. = 2.006  
Quant Mass(es) = 158  
S/N = 419.74  
Area = 35917  
Height = 4111.0  
Similarity = 891

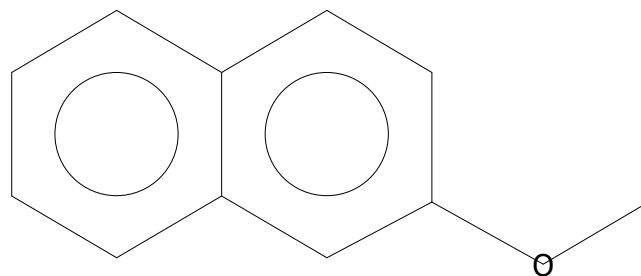

Peak Apex - sample "AerMBR A 092319 (20191119):1", peak 1533, at 1214.58 , 2.006 sec , sec (Spec # 1116 04)

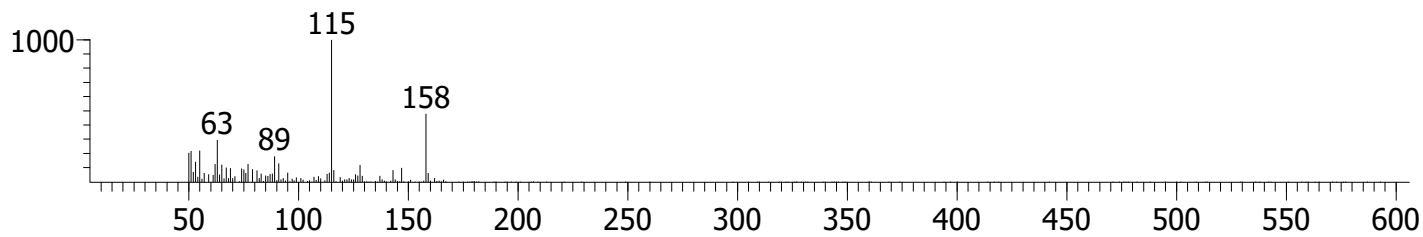

Peak True - sample "AerMBR A 092319 (20191119):1", peak 1533, at 1214.58 , 2.006 sec , sec (Spec # 1116 04)

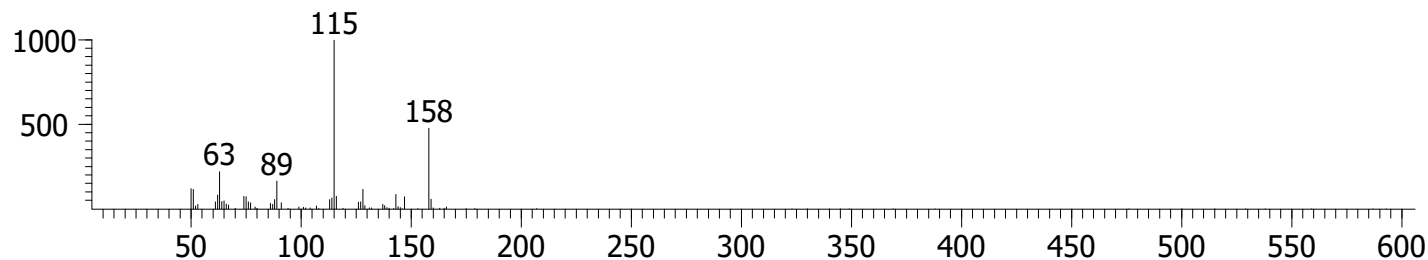

Library Hit - similarity 891, "Naphthalene, 2-methoxy-"

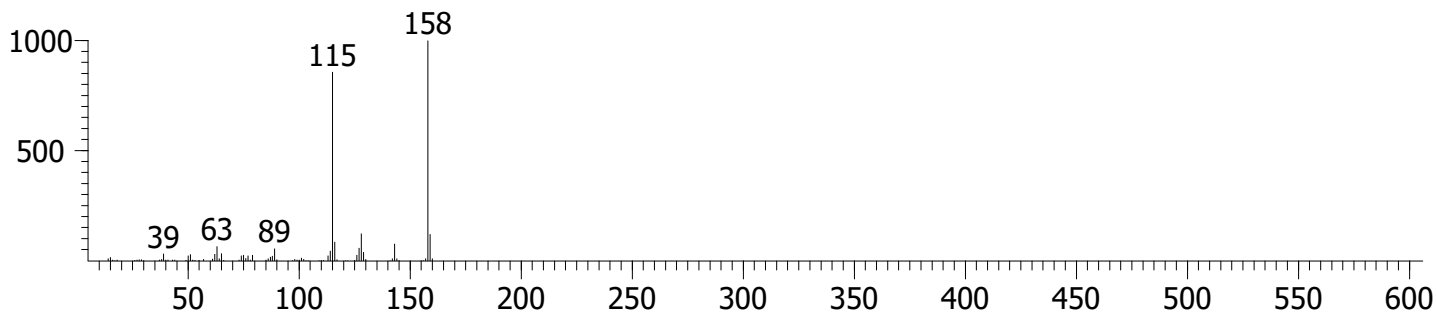

| Hit | Name                                           | Similarity | Probability | CAS       | Library | Formula  | Weight |
|-----|------------------------------------------------|------------|-------------|-----------|---------|----------|--------|
| 1   | Naphthalene, 2-methoxy-                        | 891        | 7944        | 93-04-9   | mainlib | C11H10O  | 158    |
| 2   | Naphthalene, 1-methoxy-                        | 840        | 1601        | 2216-69-5 | mainlib | C11H10O  | 158    |
| 3   | (1-Benzyl-3-phenyl-prop-2-ynyl)-dimethyl-amine | 727        | 98          | 0-00-0    | mainlib | C18H19N  | 249    |
| 4   | Cinnoline, 3,4-dimethyl-                       | 724        | 87          | 3929-83-7 | mainlib | C10H10N2 | 158    |
| 5   | Hydrazine, 2-naphthalenyl-                     | 723        | 83          | 2243-57-4 | mainlib | C10H10N2 | 158    |

# Butylated Hydroxytoluene

1st Dimension R.T. = 1277.54  
 2nd Dimension R.T. = 1.564  
 Quant Mass(es) = 205  
 S/N = 2933.7  
 Area = 229761  
 Height = 31611  
 Similarity = 883

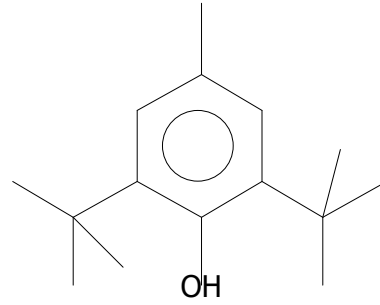

Peak Apex - sample "AerMBR A 092319 (20191119):1", peak 1688, at 1277.54 , 1.564 sec , sec (Spec # 1210 77)

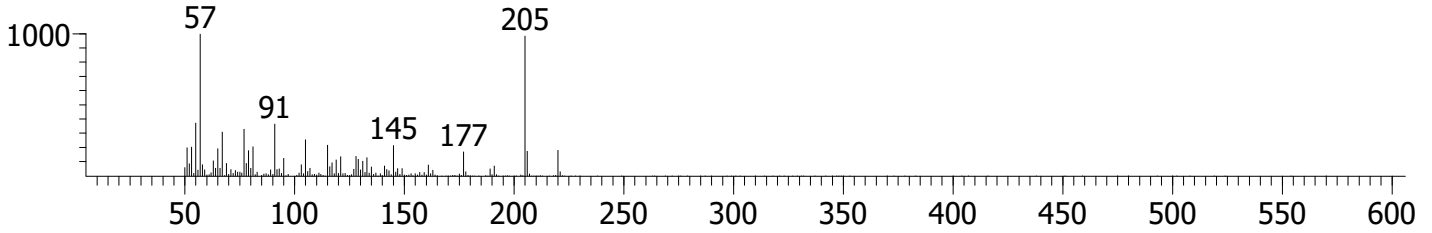

Peak True - sample "AerMBR A 092319 (20191119):1", peak 1688, at 1277.54 , 1.564 sec , sec (Spec # 1210 77)

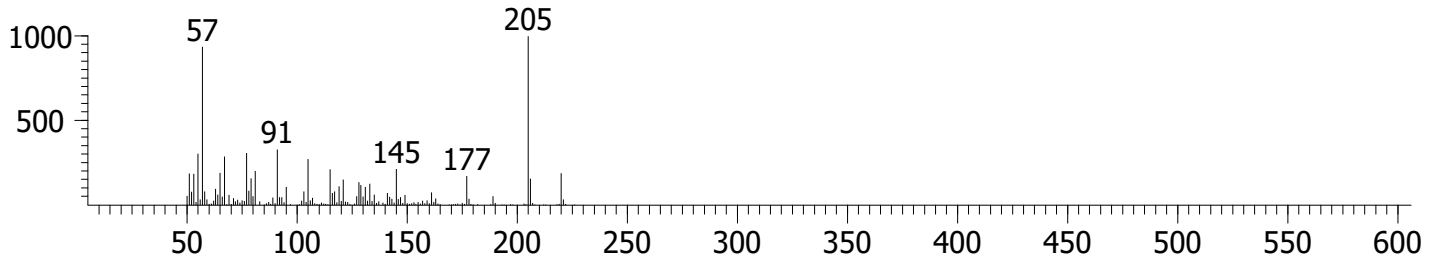

Library Hit - similarity 883, "Butylated Hydroxytoluene"

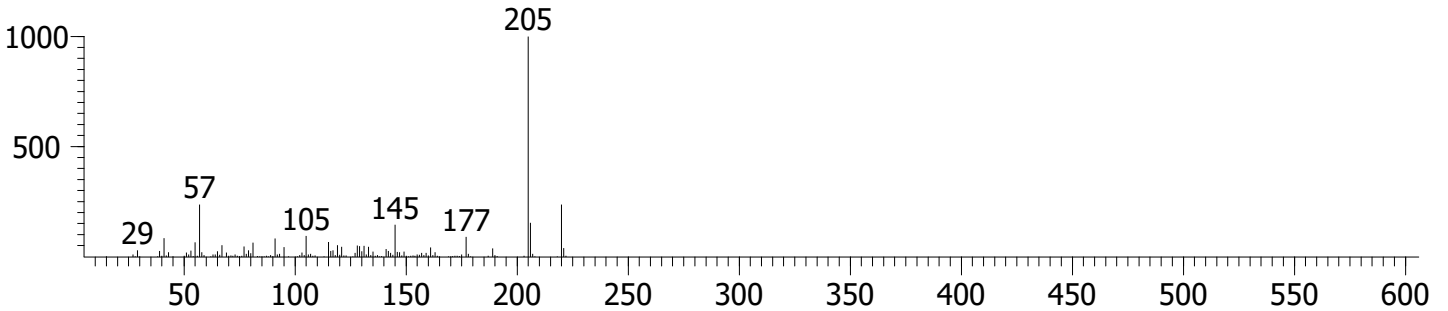

| Hit | Name                                                                           | Similarity | Probability | CAS         | Library | Formula  | Weight |
|-----|--------------------------------------------------------------------------------|------------|-------------|-------------|---------|----------|--------|
| 1   | Butylated Hydroxytoluene                                                       | 883        | 8390        | 128-37-0    | mainlib | C15H24O  | 220    |
| 2   | Phenol, 4,6-di(1,1-dimethylethyl)-2-methyl-                                    | 795        | 732         | 616-55-7    | mainlib | C15H24O  | 220    |
| 3   | 4,6-di-tert-Butyl-m-cresol                                                     | 780        | 443         | 497-39-2    | mainlib | C15H24O  | 220    |
| 4   | Ethanone, 1-(5,6,7,8-tetrahydro-2,8,8-trimethyl-4H-cyclohepta[b]furan-5-yl)-   | 750        | 123         | 71596-88-8  | mainlib | C14H20O2 | 220    |
| 5   | Cyclopropanecarboxylic acid, 1-hydroxy-, (2,6-di-t-butyl-4-methylphenyl) ester | 749        | 118         | 108546-75-4 | mainlib | C19H28O3 | 304    |

1-Penten-3-one,  
1-(2,6,6-trimethyl-2-cyclohexen-1-yl)-

1st Dimension R.T. = 1288.04  
 2nd Dimension R.T. = 1.551  
 Quant Mass(es) = 121  
 S/N = 549.56  
 Area = 87067  
 Height = 11107  
 Similarity = 894

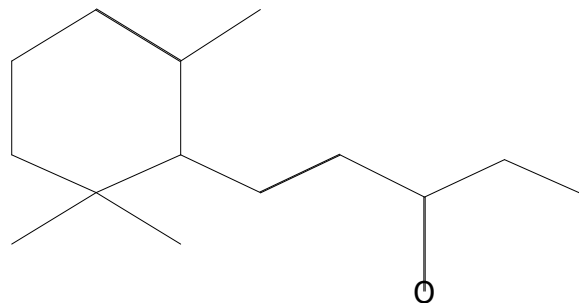

Peak Apex - sample "AerMBR A 092319 (20191119):1", peak 1703, at 1288.04 , 1.551 sec , sec (Spec # 1226 65)

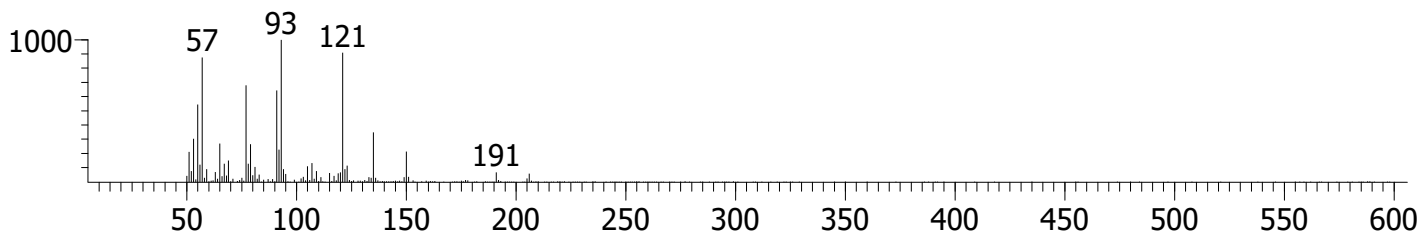

Peak True - sample "AerMBR A 092319 (20191119):1", peak 1703, at 1288.04 , 1.551 sec , sec (Spec # 1226 65)

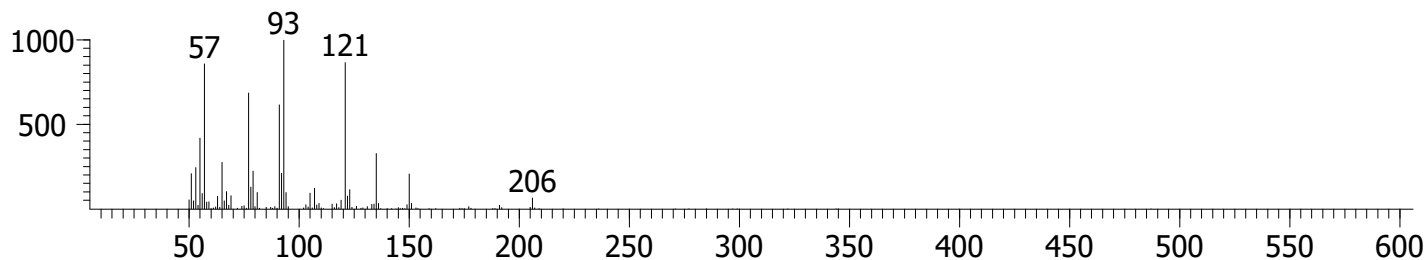

Library Hit - similarity 894, "1-Penten-3-one, 1-(2,6,6-trimethyl-2-cyclohexen-1-yl)-"

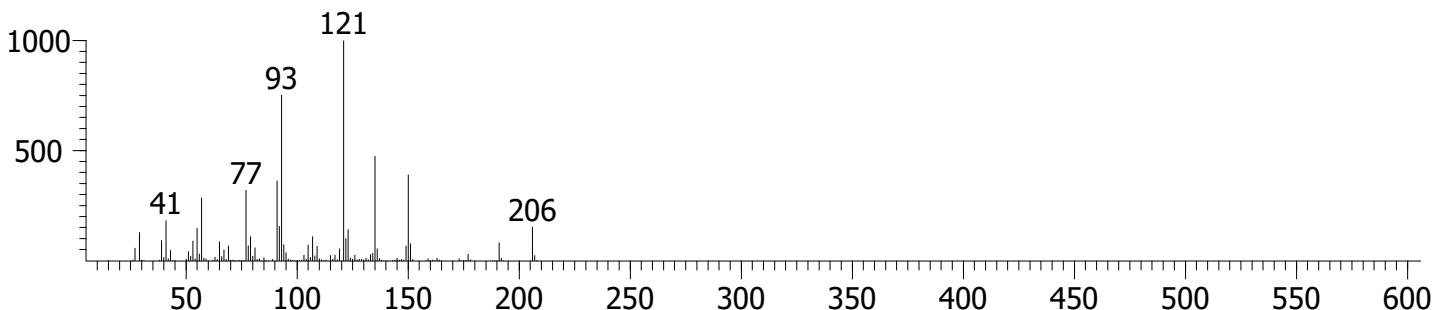

| Hit | Name                                                         | Similarity | Probability | CAS        | Library | Formula | Weight |
|-----|--------------------------------------------------------------|------------|-------------|------------|---------|---------|--------|
| 1   | 1-Penten-3-one, 1-(2,6,6-trimethyl-2-cyclohexen-1-yl)-       | 894        | 7714        | 7779-30-8  | mainlib | C14H22O | 206    |
| 2   | 1-Penten-3-one, 1-(2,6,6-trimethyl-2-cyclohexen-1-yl)-, (E)- | 830        | 1267        | 93302-56-8 | mainlib | C14H22O | 206    |
| 3   | 2-Isopropylidene-3-methylhexa-3,5-dienal                     | 734        | 101         | 0-00-0     | mainlib | C10H14O | 150    |
| 4   | 3-Nonen-5-yne, 4-ethyl-, (E)-                                | 729        | 81          | 74744-60-8 | mainlib | C11H18  | 150    |
| 5   | 3-Nonen-5-yne, 4-ethyl-, (Z)-                                | 721        | 60          | 74744-26-6 | mainlib | C11H18  | 150    |

# Benzoic acid, 4-ethoxy-, ethyl ester

1st Dimension R.T. = 1291.54  
2nd Dimension R.T. = 1.795  
Quant Mass(es) = 121  
S/N = 18939  
Area = 3152268  
Height = 373733  
Similarity = 921

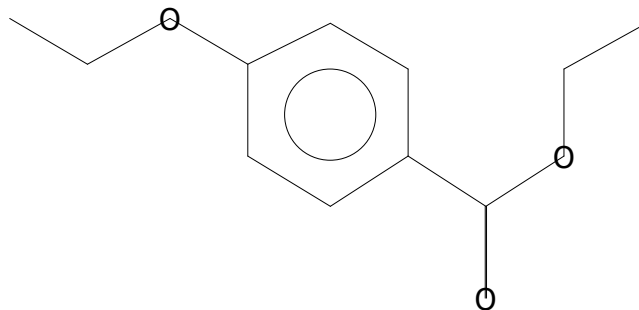

Peak Apex - sample "AerMBR A 092319 (20191119):1", peak 1713, at 1291.54 , 1.795 sec , sec (Spec # 1232 32)

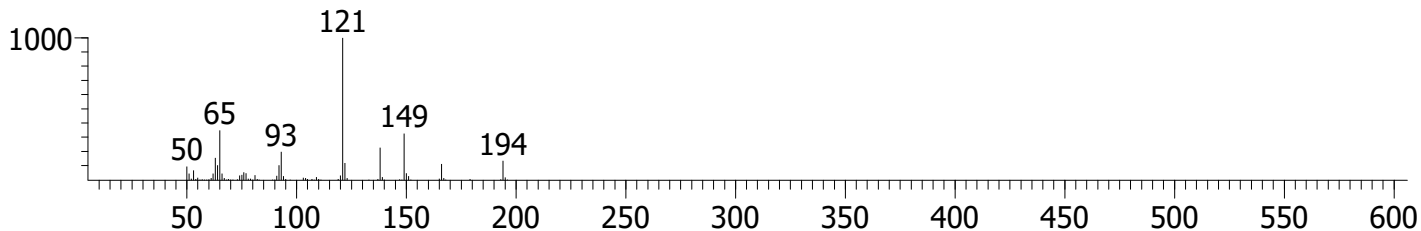

Peak True - sample "AerMBR A 092319 (20191119):1", peak 1713, at 1291.54 , 1.795 sec , sec (Spec # 1232 32)

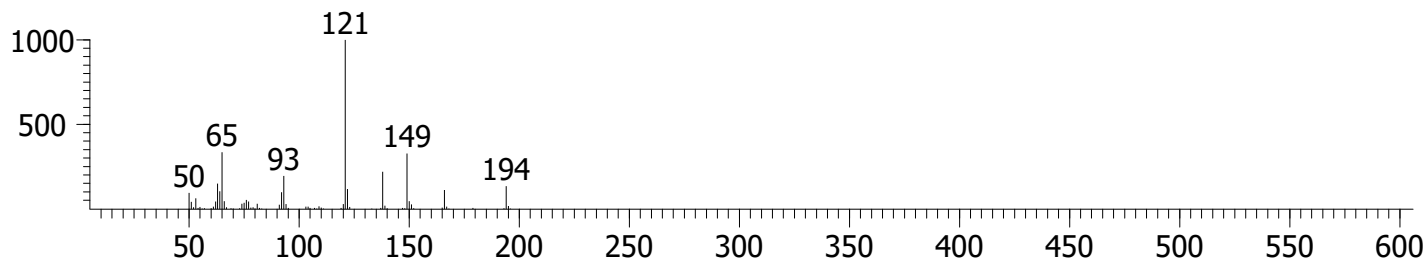

Library Hit - similarity 921, "Benzoic acid, 4-ethoxy-, ethyl ester"

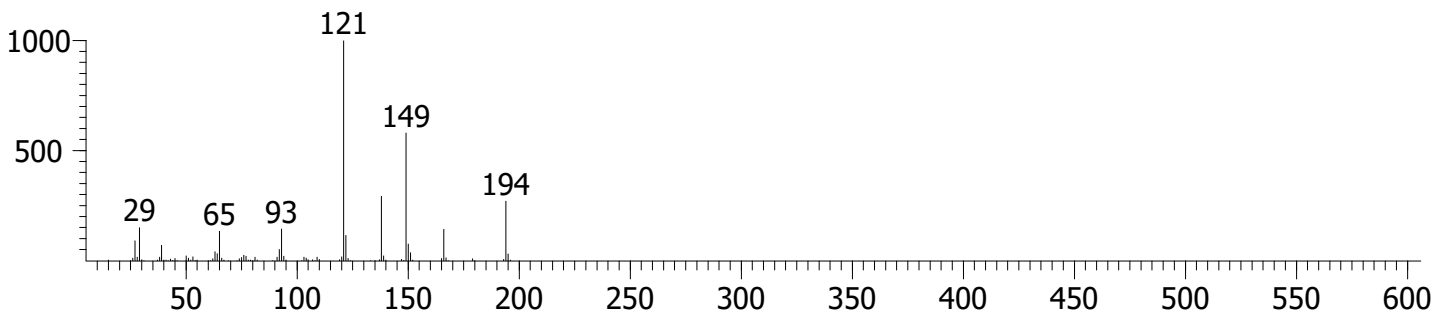

| Hit | Name                                   | Similarity | Probability | CAS        | Library | Formula   | Weight |
|-----|----------------------------------------|------------|-------------|------------|---------|-----------|--------|
| 1   | Benzoic acid, 4-ethoxy-, ethyl ester   | 921        | 8866        | 23676-09-7 | mainlib | C11H14O3  | 194    |
| 2   | Benzoic acid, 3-ethoxy-, ethyl ester   | 791        | 367         | 0-00-0     | mainlib | C11H14O3  | 194    |
| 3   | 2-Ethoxybenzhydrazide                  | 773        | 189         | 21018-13-3 | mainlib | C9H12N2O2 | 180    |
| 4   | 4-Ethoxybenzoyl chloride               | 754        | 92          | 16331-46-7 | mainlib | C9H9ClO2  | 184    |
| 5   | 3-(4-Ethoxyphenyl)-3-oxopropanenitrile | 754        | 92          | 54605-62-8 | mainlib | C11H11NO2 | 189    |

## 2-Naphthalenol

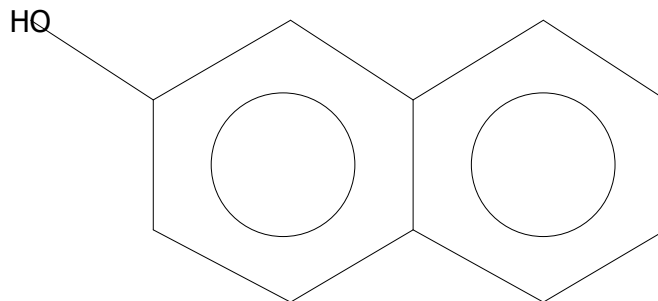

1st Dimension R.T. = 1291.54

2nd Dimension R.T. = 2.191

Quant Mass(es) = 144

S/N = 590.07

Area = 87577

Height = 9980.4

Similarity = 874

Peak Apex - sample "AerMBR A 092319 (20191119):1", peak 1715, at 1291.54 , 2.191 sec , sec (Spec # 1232 92)

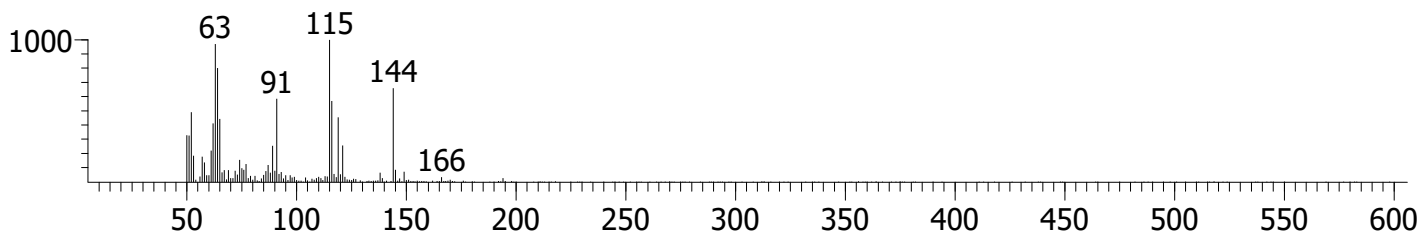

Peak True - sample "AerMBR A 092319 (20191119):1", peak 1715, at 1291.54 , 2.191 sec , sec (Spec # 1232 92)

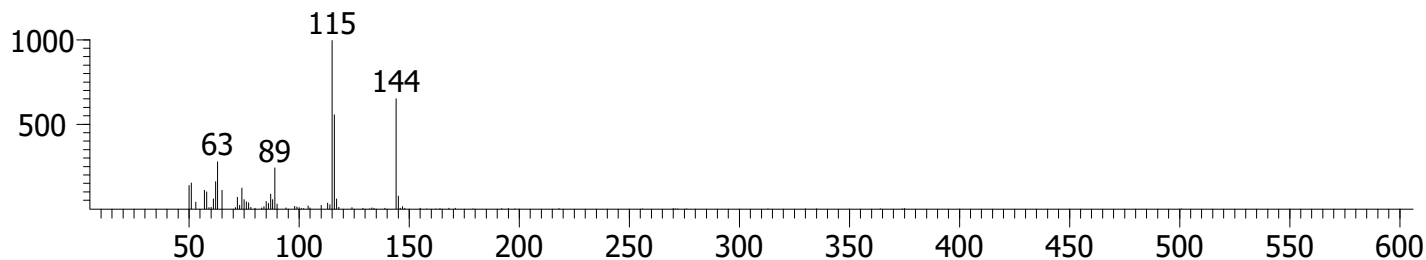

Library Hit - similarity 874, "2-Naphthalenol"

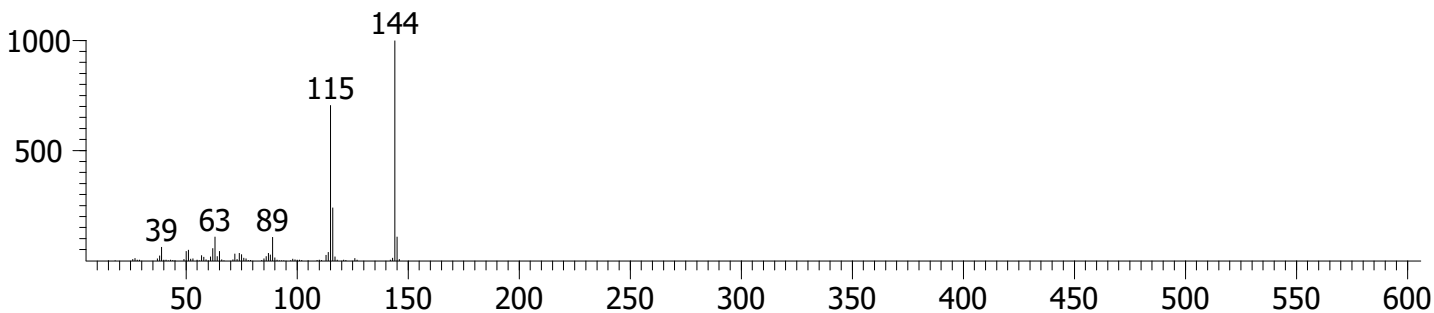

| Hit | Name                         | Similarity | Probability | CAS        | Library | Formula   | Weight |
|-----|------------------------------|------------|-------------|------------|---------|-----------|--------|
| 1   | 2-Naphthalenol               | 874        | 4457        | 135-19-3   | mainlib | C10H8O    | 144    |
| 2   | 1-Naphthyl n-propylcarbamate | 856        | 2298        | 25216-27-7 | mainlib | C14H15NO2 | 229    |
| 3   | 1-Naphthalenol               | 842        | 1439        | 90-15-3    | mainlib | C10H8O    | 144    |
| 4   | Cinnoline, 3-methyl-         | 790        | 287         | 17372-78-0 | mainlib | C9H8N2    | 144    |
| 5   | Furan, 3-phenyl-             | 780        | 202         | 13679-41-9 | mainlib | C10H8O    | 144    |

# o-Hydroxybiphenyl

1st Dimension R.T. = 1295.03  
2nd Dimension R.T. = 2.072  
Quant Mass(es) = 170  
S/N = 2296.9  
Area = 258373  
Height = 28663  
Similarity = 892

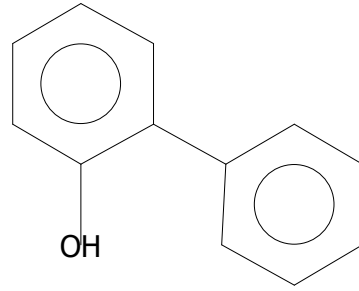

Peak Apex - sample "AerMBR A 092319 (20191119):1", peak 1723, at 1295.03 , 2.072 sec , sec (Spec # 1238 04)

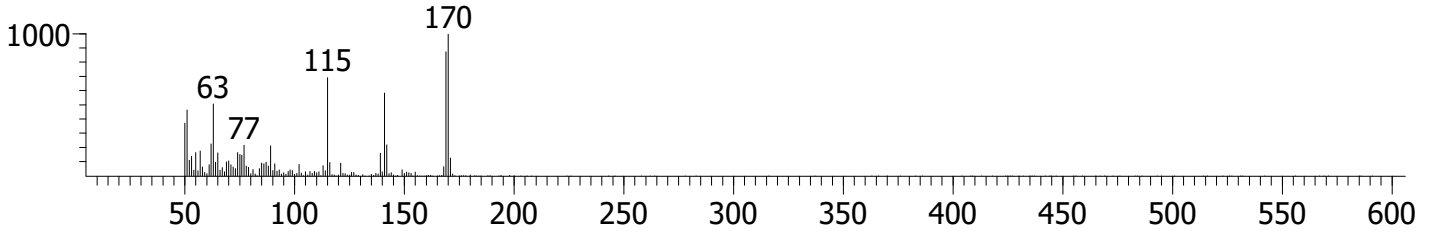

Peak True - sample "AerMBR A 092319 (20191119):1", peak 1723, at 1295.03 , 2.072 sec , sec (Spec # 1238 04)

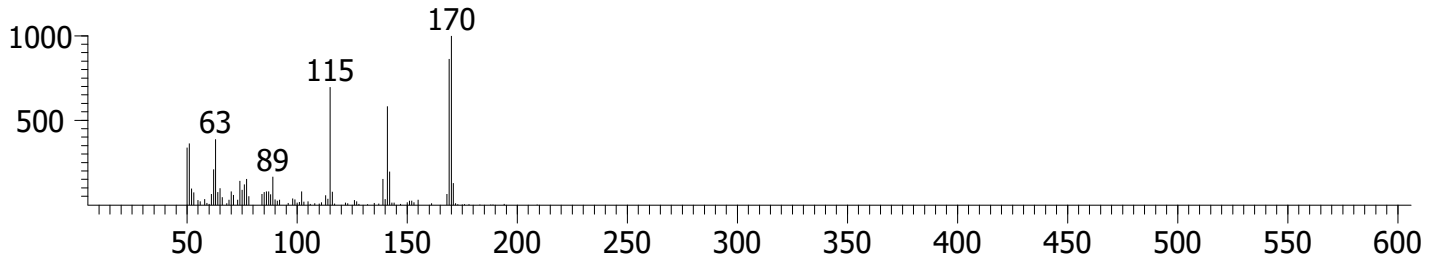

Library Hit - similarity 892, "o-Hydroxybiphenyl"

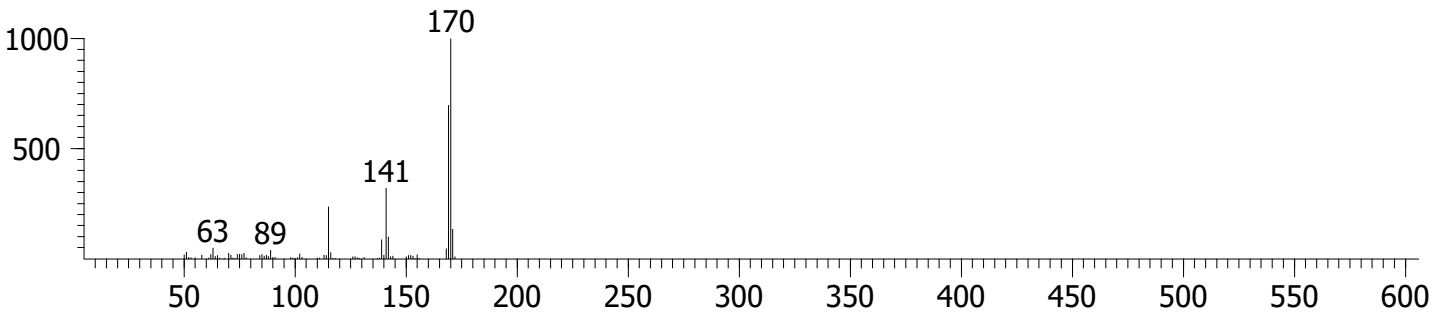

| Hit | Name                                            | Similarity | Probability | CAS        | Library | Formula | Weight |
|-----|-------------------------------------------------|------------|-------------|------------|---------|---------|--------|
| 1   | o-Hydroxybiphenyl                               | 892        | 6881        | 90-43-7    | mainlib | C12H10O | 170    |
| 2   | 1-Naphthalenecarboxaldehyde, 4-methyl-          | 863        | 1950        | 33738-48-6 | mainlib | C12H10O | 170    |
| 3   | Spiro[cyclopropane-1,1'(4'H)-naphthalen]-4'-one | 825        | 467         | 33498-24-7 | mainlib | C12H10O | 170    |
| 4   | 1,1'-Biphenyl, 2-butoxy-                        | 789        | 115         | 55059-22-8 | mainlib | C16H18O | 226    |
| 5   | 1H,3H-Naphtho[1,8-cd]pyran                      | 787        | 106         | 203-84-9   | mainlib | C12H10O | 170    |

## Pyrazine, trimethyl-

1st Dimension R.T. = 1358  
2nd Dimension R.T. = 2.330  
Quant Mass(es) = 122  
S/N = 75.602  
Area = 14006  
Height = 1387.9  
Similarity = 518

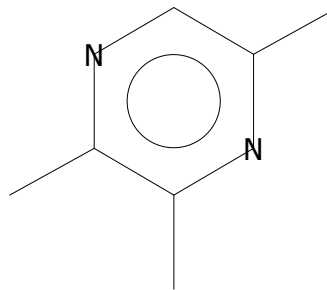

Peak Apex - sample "AerMBR A 092319 (20191119):1", peak 1856, at 1358 , 2.330 sec , sec (Spec # 133383)

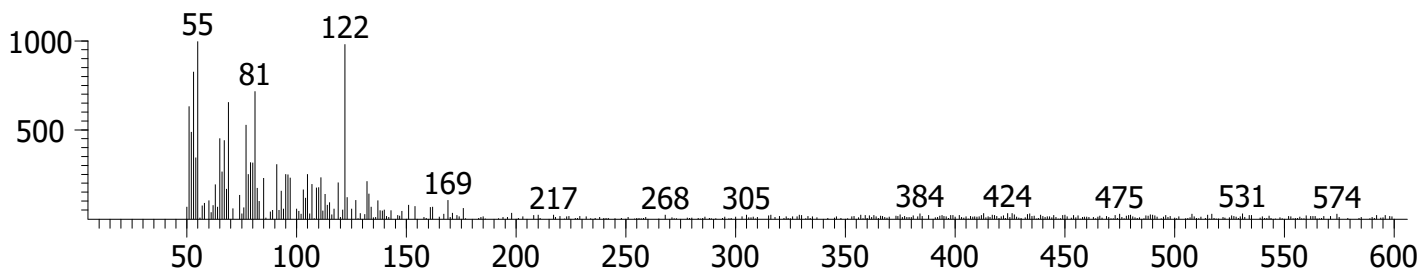

Peak True - sample "AerMBR A 092319 (20191119):1", peak 1856, at 1358 , 2.330 sec , sec (Spec # 133383)

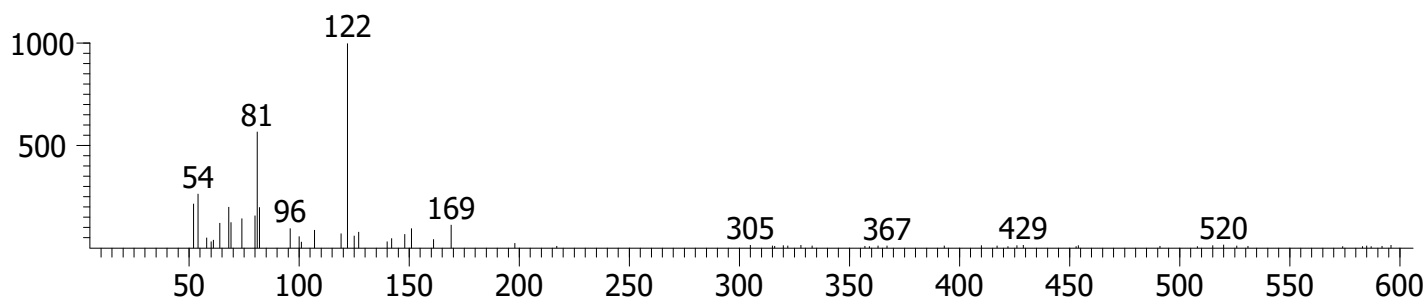

Library Hit - similarity 518, "Pyrazine, trimethyl-"

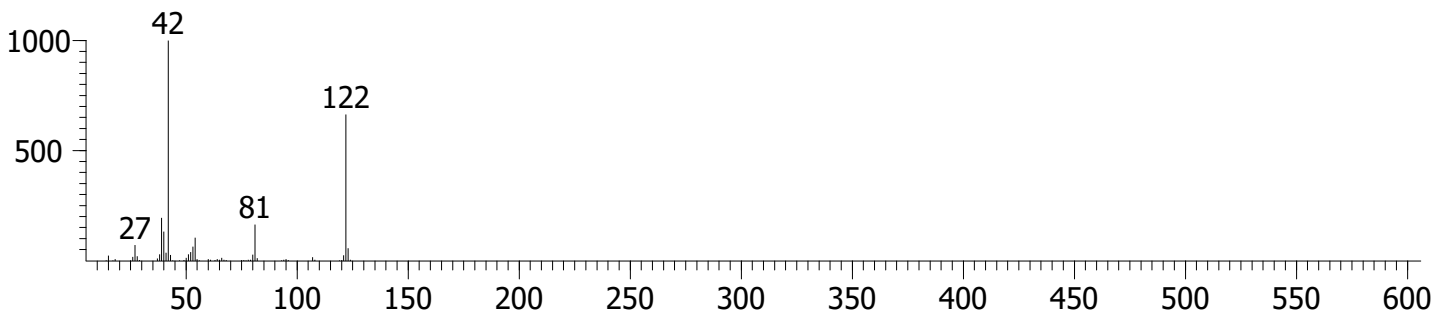

| Hit | Name                                                      | Similarity | Probability | CAS        | Library | Formula  | Weight |
|-----|-----------------------------------------------------------|------------|-------------|------------|---------|----------|--------|
| 1   | Pyrazine, trimethyl-                                      | 518        | 1494        | 14667-55-1 | mainlib | C7H10N2  | 122    |
| 2   | Bicyclo[3.3.1]nonan-3-ol, exo-                            | 516        | 1378        | 10036-08-5 | mainlib | C9H16O   | 140    |
| 3   | (5-Methyl-2H-[1,2,4]triazolo-3-yl)acetonitrile            | 511        | 1111        | 0-00-0     | mainlib | C5H6N4   | 122    |
| 4   | Cyclohexanecarboxylic acid, 2-(2-propenyl)-, methyl ester | 507        | 938         | 84694-72-4 | mainlib | C11H18O2 | 182    |
| 5   | Bicyclo[3.3.1]nonan-9-ol                                  | 502        | 756         | 15598-80-8 | mainlib | C9H16O   | 140    |



## Gabapentin

1st Dimension R.T. = 1368.49  
2nd Dimension R.T. = 2.330  
Quant Mass(es) = 153  
S/N = 693.63  
Area = 149504  
Height = 13545  
Similarity = 914

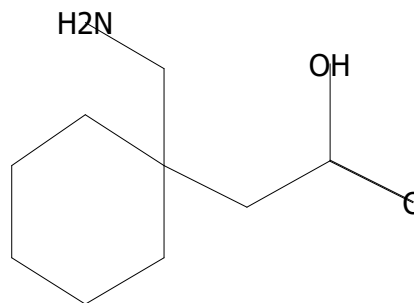

Peak Apex - sample "AerMBR A 092319 (20191119):1", peak 1879, at 1368.49 , 2.330 sec , sec (Spec # 1349 73)

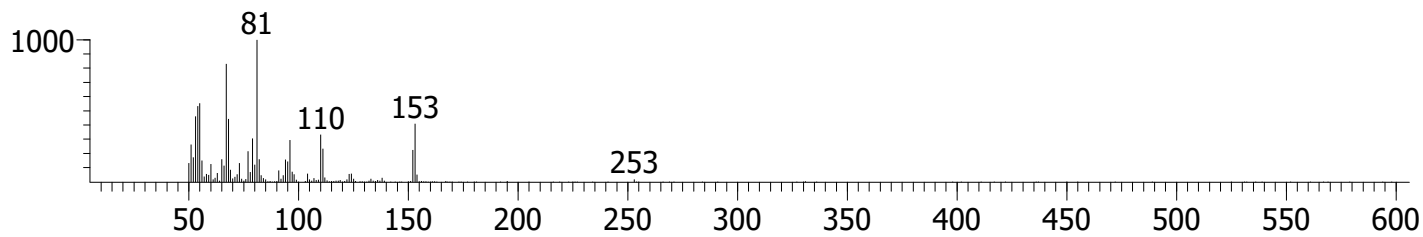

Peak True - sample "AerMBR A 092319 (20191119):1", peak 1879, at 1368.49 , 2.330 sec , sec (Spec # 1349 73)

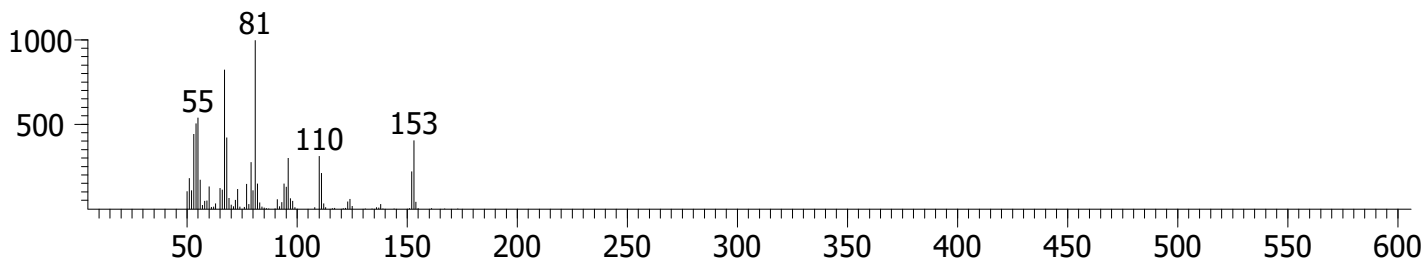

Library Hit - similarity 914, "Gabapentin"

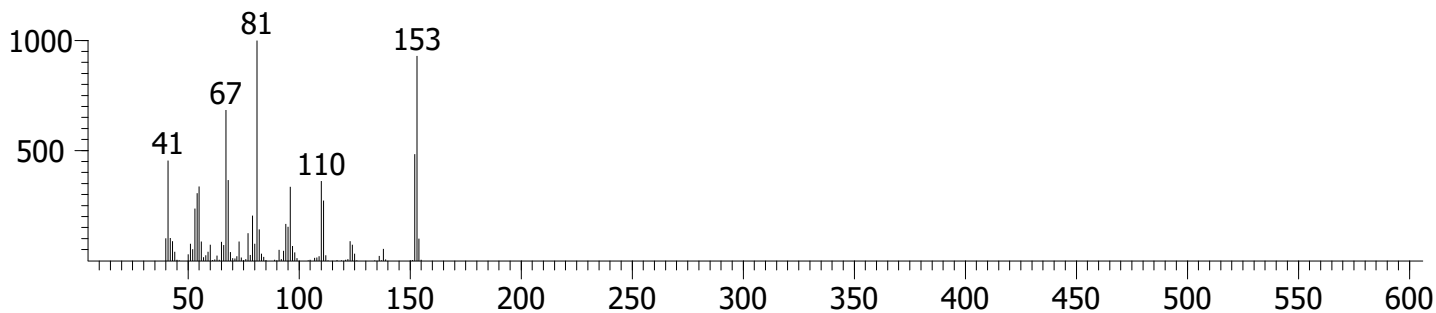

| Hit | Name                        | Similarity | Probability | CAS        | Library | Formula  | Weight |
|-----|-----------------------------|------------|-------------|------------|---------|----------|--------|
| 1   | Gabapentin                  | 914        | 5335        | 60142-96-3 | mainlib | C9H17NO2 | 171    |
| 2   | Gabapentin lactam           | 906        | 3980        | 64744-50-9 | mainlib | C9H15NO  | 153    |
| 3   | 5-Decen-1-ol, acetate, (E)- | 725        | 70          | 38421-90-8 | mainlib | C12H22O2 | 198    |
| 4   | Spiro[3.5]nonan-1-one       | 705        | 31          | 29800-45-1 | mainlib | C9H14O   | 138    |
| 5   | 1,3-Octadiene               | 699        | 25          | 1002-33-1  | mainlib | C8H14    | 110    |

## 1H-Benzotriazole, 4-methyl-

1st Dimension R.T. = 1368.49  
2nd Dimension R.T. = 2.356  
Quant Mass(es) = 104  
S/N = 257.20  
Area = 91829  
Height = 9482.0  
Similarity = 853

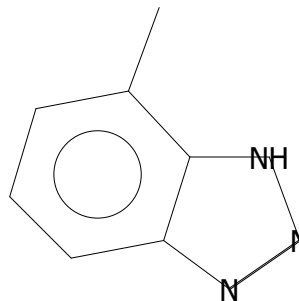

Peak Apex - sample "AerMBR A 092319 (20191119):1", peak 1880, at 1368.49 , 2.356 sec , sec (Spec # 1349 77)

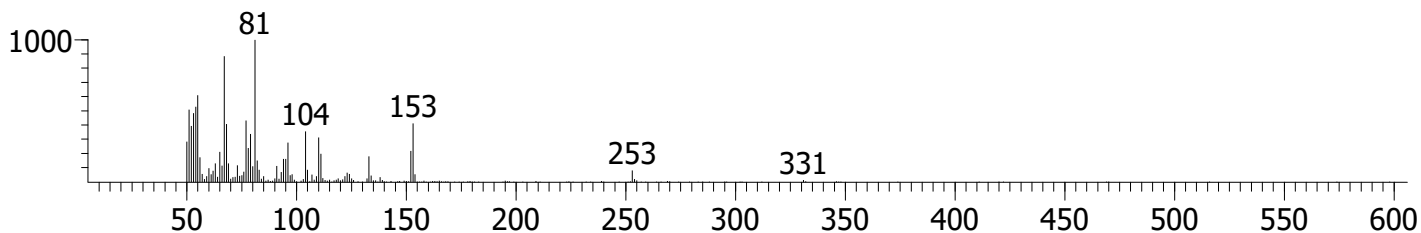

Peak True - sample "AerMBR A 092319 (20191119):1", peak 1880, at 1368.49 , 2.356 sec , sec (Spec # 1349 77)

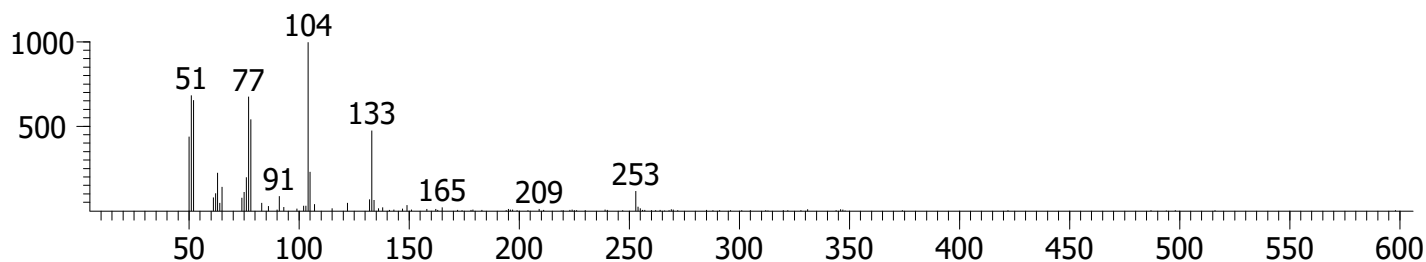

Library Hit - similarity 853, "1H-Benzotriazole, 4-methyl-"

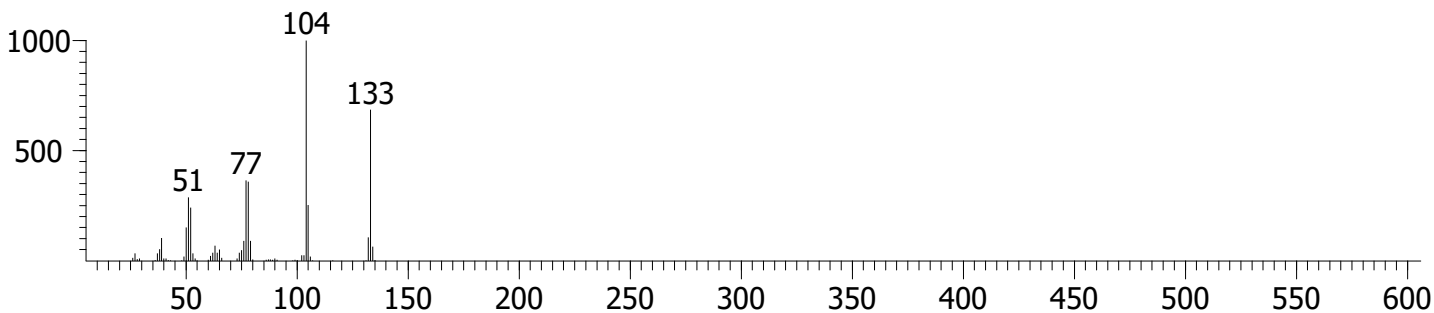

| Hit | Name                         | Similarity | Probability | CAS        | Library | Formula | Weight |
|-----|------------------------------|------------|-------------|------------|---------|---------|--------|
| 1   | 1H-Benzotriazole, 4-methyl-  | 853        | 5417        | 29878-31-7 | mainlib | C7H7N3  | 133    |
| 2   | 1H-Benzotriazole, 5-methyl-  | 799        | 1061        | 136-85-6   | mainlib | C7H7N3  | 133    |
| 3   | 1-Benzofuran-7-amine         | 790        | 770         | 67830-55-1 | mainlib | C8H7NO  | 133    |
| 4   | 2H-Indol-2-one, 1,3-dihydro- | 785        | 621         | 59-48-3    | mainlib | C8H7NO  | 133    |
| 5   | Benzene, (azidomethyl)-      | 767        | 320         | 622-79-7   | mainlib | C7H7N3  | 133    |

## Diethyl Phthalate

1st Dimension R.T. = 1375.49  
2nd Dimension R.T. = 2.020  
Quant Mass(es) = 149  
S/N = 1568.4  
Area = 344554  
Height = 34991  
Similarity = 927

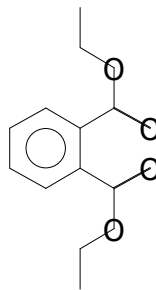

Peak Apex - sample "AerMBR A 092319 (20191119):1", peak 1898, at 1375.49 , 2.020 sec , sec (Spec # 1359 86)

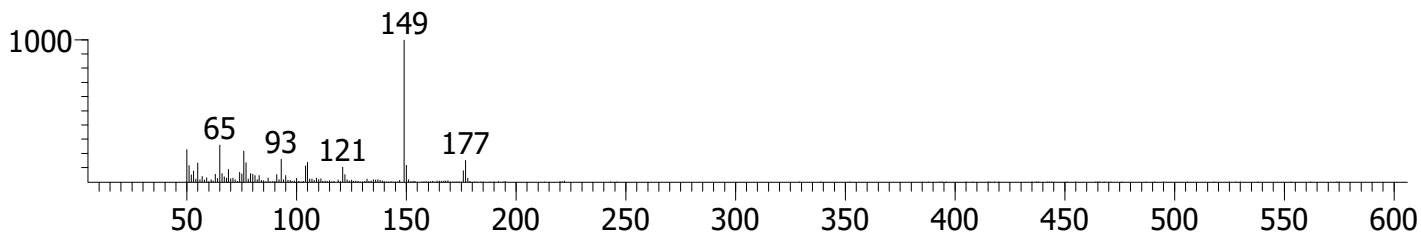

Peak True - sample "AerMBR A 092319 (20191119):1", peak 1898, at 1375.49 , 2.020 sec , sec (Spec # 1359 86)

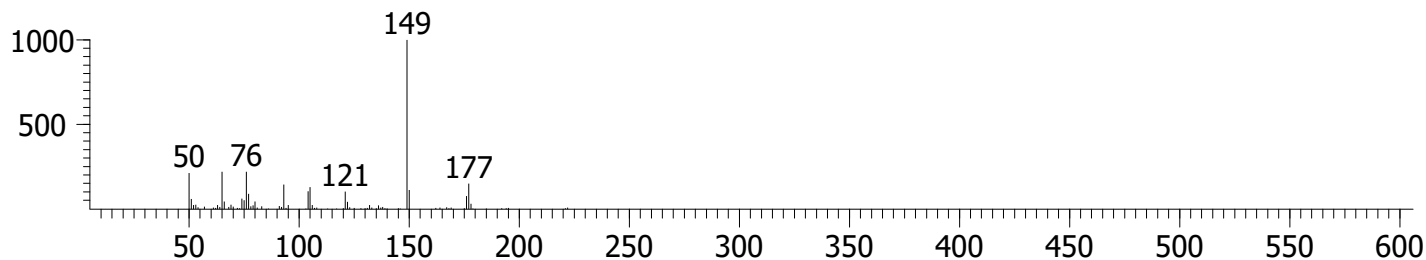

Library Hit - similarity 927, "Diethyl Phthalate"

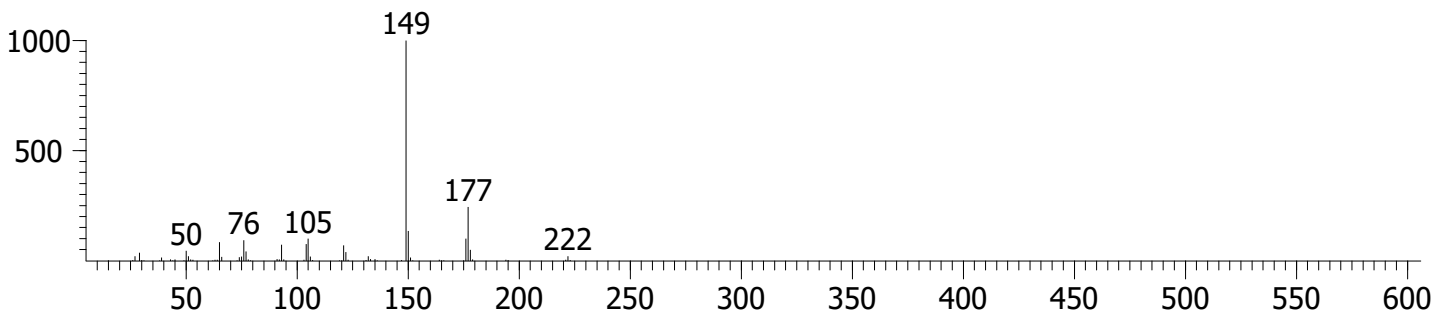

| Hit | Name                                   | Similarity | Probability | CAS       | Library | Formula  | Weight |
|-----|----------------------------------------|------------|-------------|-----------|---------|----------|--------|
| 1   | Diethyl Phthalate                      | 927        | 6960        | 84-66-2   | mainlib | C12H14O4 | 222    |
| 2   | Benzoic acid, 2-(1-oxopropyl)-         | 847        | 765         | 2360-45-4 | mainlib | C10H10O3 | 178    |
| 3   | 2-Acetylbenzoic acid                   | 830        | 417         | 577-56-0  | mainlib | C9H8O3   | 164    |
| 4   | Phthalic acid, di-(1-hexen-5-yl) ester | 819        | 286         | 0-00-0    | mainlib | C20H26O4 | 330    |
| 5   | Phthalic acid, monoethyl ester         | 804        | 173         | 2306-33-4 | mainlib | C10H10O4 | 194    |

## Benzophenone

1st Dimension R.T. = 1424.46

2nd Dimension R.T. = 2.185

Quant Mass(es) = 105

S/N = 5030.3

Area = 1969521

Height = 196516

Similarity = 888

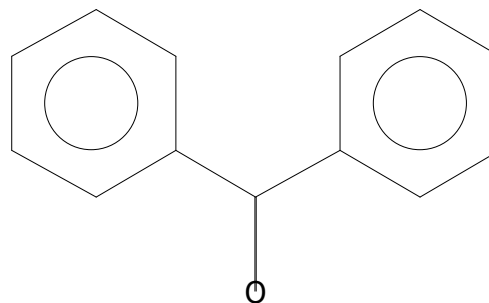

Peak Apex - sample "AerMBR A 092319 (20191119):1", peak 1996, at 1424.46 , 2.185 sec , sec (Spec # 1434 31)

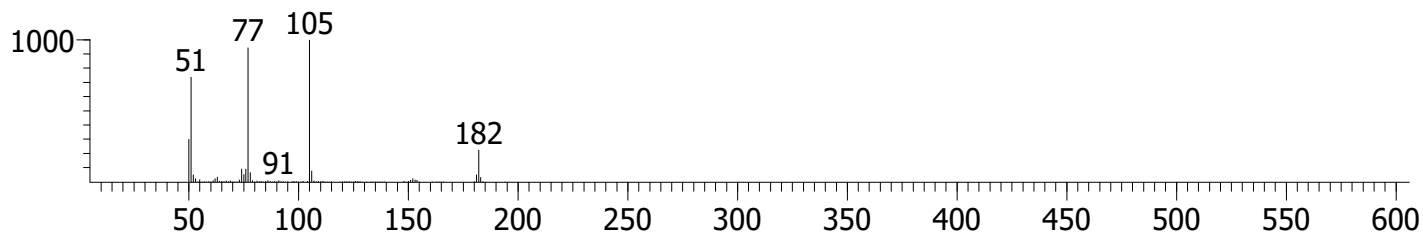

Peak True - sample "AerMBR A 092319 (20191119):1", peak 1996, at 1424.46 , 2.185 sec , sec (Spec # 1434 31)

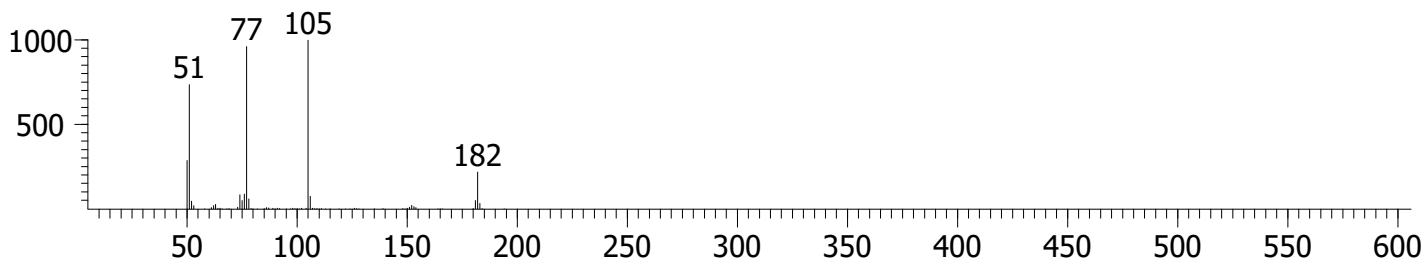

Library Hit - similarity 888, "Benzophenone"

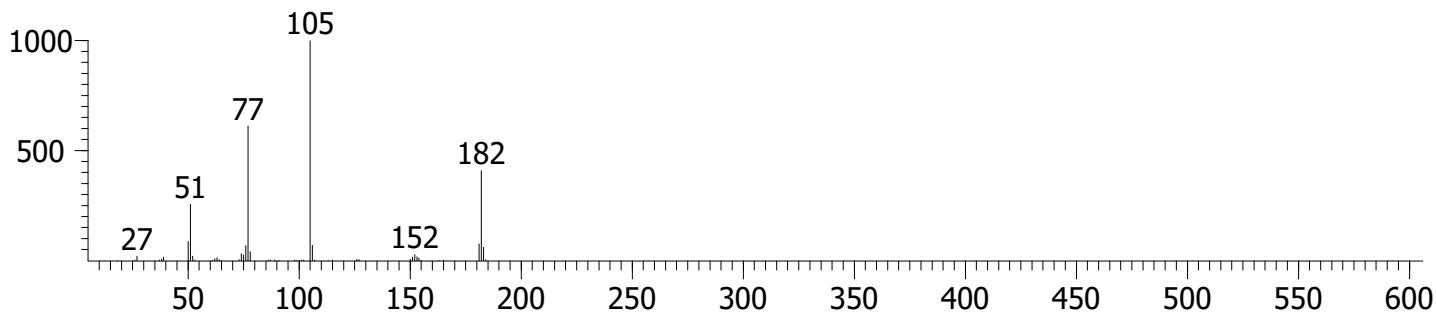

| Hit | Name                                     | Similarity | Probability | CAS        | Library | Formula   | Weight |
|-----|------------------------------------------|------------|-------------|------------|---------|-----------|--------|
| 1   | Benzophenone                             | 888        | 981         | 119-61-9   | mainlib | C13H10O   | 182    |
| 2   | 2(5H)-Thiazolone, 4-(benzoyloxy)-        | 884        | 829         | 0-00-0     | mainlib | C10H7NO3S | 221    |
| 3   | Benzeneacetic acid, à-oxo-, methyl ester | 877        | 635         | 15206-55-0 | mainlib | C9H8O3    | 164    |
| 4   | N-(1H-Tetrazol-5-yl)benzamide            | 872        | 512         | 4847-62-5  | mainlib | C8H7N5O   | 189    |
| 5   | Benzoylformic acid                       | 870        | 472         | 611-73-4   | mainlib | C8H6O3    | 150    |

## Benzenesulfonamide, 2-methyl-

1st Dimension R.T. = 1431.46  
2nd Dimension R.T. = 2.666  
Quant Mass(es) = 90  
S/N = 296.37  
Area = 62089  
Height = 5949.8  
Similarity = 800

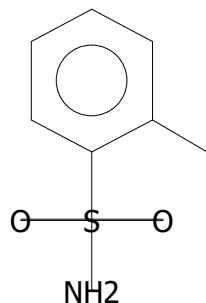

Peak Apex - sample "AerMBR A 092319 (20191119):1", peak 2013, at 1431.46 , 2.666 sec , sec (Spec # 1445 64)

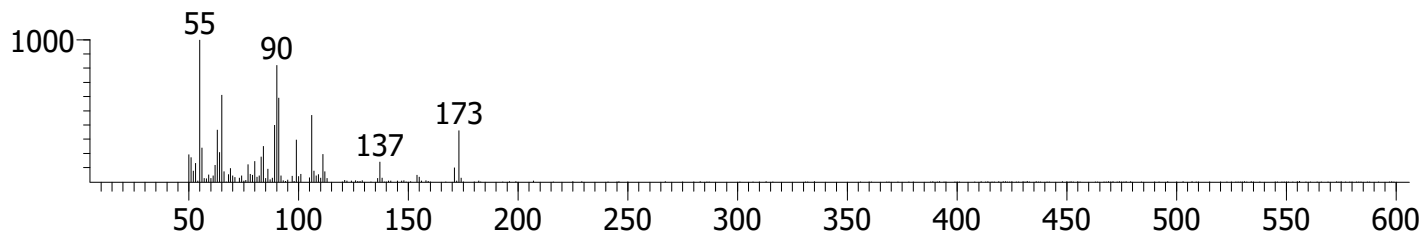

Peak True - sample "AerMBR A 092319 (20191119):1", peak 2013, at 1431.46 , 2.666 sec , sec (Spec # 1445 64)

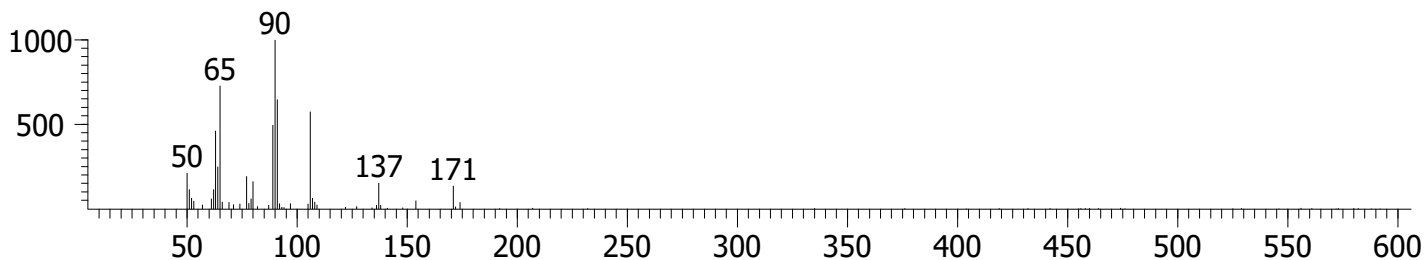

Library Hit - similarity 800, "Benzenesulfonamide, 2-methyl-"

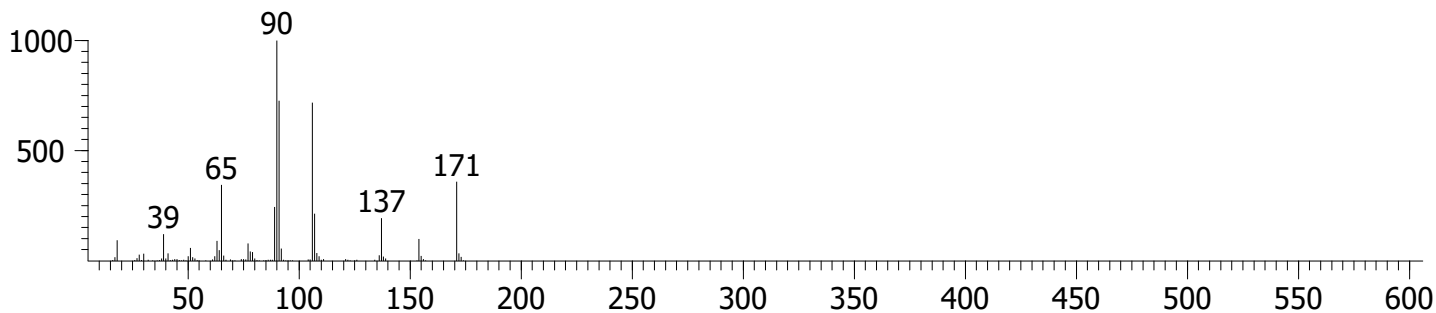

| Hit | Name                                            | Similarity | Probability | CAS        | Library | Formula                                                        | Weight |
|-----|-------------------------------------------------|------------|-------------|------------|---------|----------------------------------------------------------------|--------|
| 1   | Benzenesulfonamide, 2-methyl-                   | 800        | 7005        | 88-19-7    | mainlib | C <sub>7</sub> H <sub>9</sub> NO <sub>2</sub> S                | 171    |
| 2   | 4-(2-Aminoethyl)benzenesulfonamide              | 721        | 798         | 35303-76-5 | mainlib | C <sub>8</sub> H <sub>12</sub> N <sub>2</sub> O <sub>2</sub> S | 200    |
| 3   | 2-Iodoamphetamine                               | 716        | 643         | 22080-10-0 | mainlib | C <sub>9</sub> H <sub>12</sub> I <sub>2</sub> N                | 261    |
| 4   | Phenethylamine, 4-iodo-à-methyl-, hydrochloride | 709        | 493         | 21894-58-6 | mainlib | C <sub>9</sub> H <sub>12</sub> I <sub>2</sub> N                | 261    |
| 5   | Phenethylamine, 3-iodo-à-methyl-, hydrochloride | 707        | 454         | 20110-28-5 | mainlib | C <sub>9</sub> H <sub>12</sub> I <sub>2</sub> N                | 261    |

## Triethyl citrate

1st Dimension R.T. = 1438.45  
2nd Dimension R.T. = 1.835  
Quant Mass(es) = 157  
S/N = 11171  
Area = 1108966  
Height = 124590  
Similarity = 907

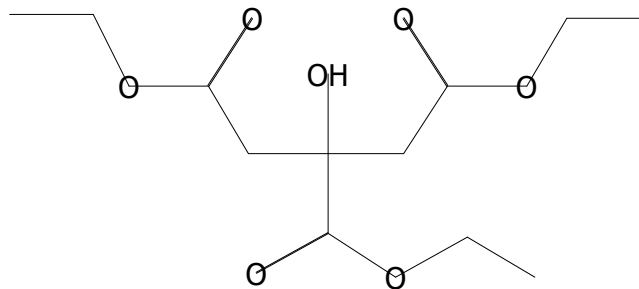

Peak Apex - sample "AerMBR A 092319 (20191119):1", peak 2029, at 1438.45 , 1.835 sec , sec (Spec # 1454 98)

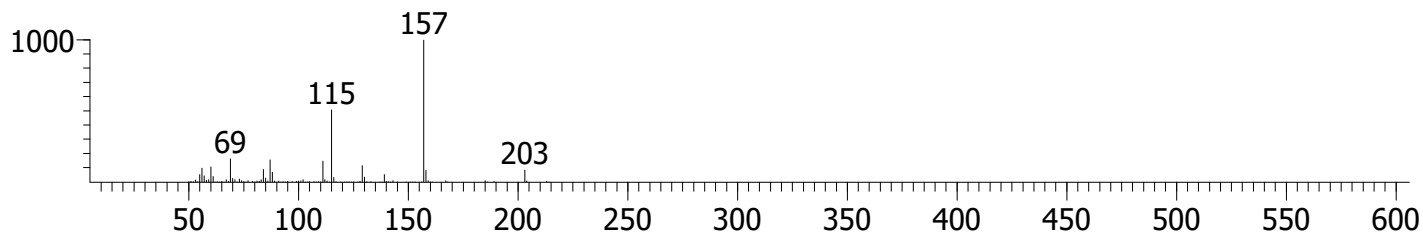

Peak True - sample "AerMBR A 092319 (20191119):1", peak 2029, at 1438.45 , 1.835 sec , sec (Spec # 1454 98)

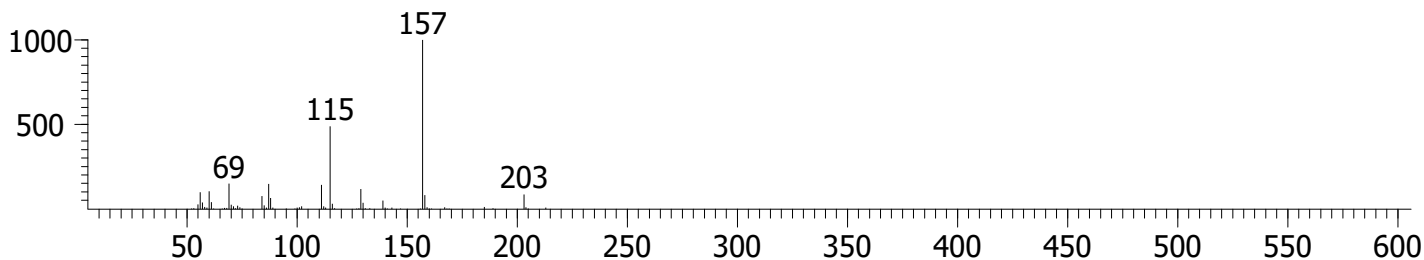

Library Hit - similarity 907, "Triethyl citrate"

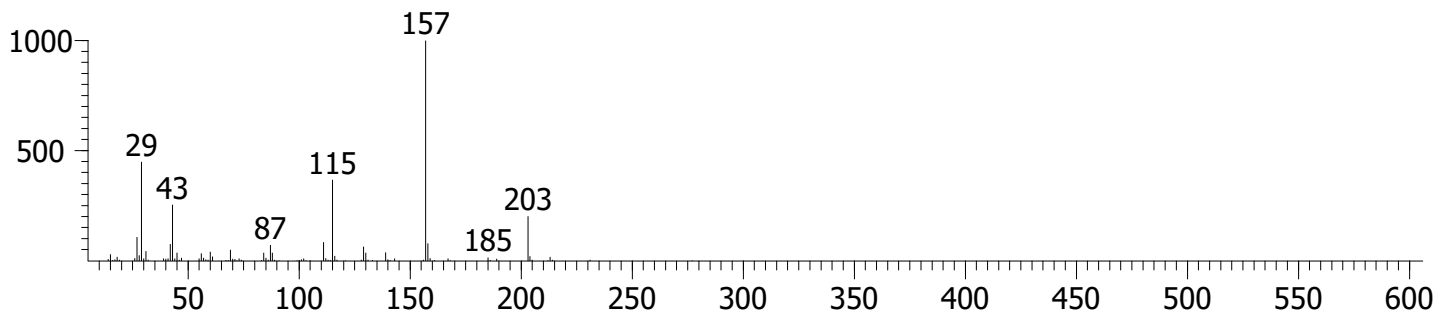

| Hit | Name                                          | Similarity | Probability | CAS        | Library | Formula  | Weight |
|-----|-----------------------------------------------|------------|-------------|------------|---------|----------|--------|
| 1   | Triethyl citrate                              | 907        | 9558        | 77-93-0    | mainlib | C12H20O7 | 276    |
| 2   | à-l-Mannopyranose, 6-deoxy-, tetraacetate     | 743        | 231         | 27821-11-0 | mainlib | C14H20O9 | 332    |
| 3   | Glutaric acid, 2-methylpent-3-yl propyl ester | 713        | 64          | 0-00-0     | mainlib | C14H26O4 | 258    |
| 4   | Glutaric acid, 4-heptyl propyl ester          | 708        | 51          | 0-00-0     | mainlib | C15H28O4 | 272    |
| 5   | Glutaric acid, 2-octyl propyl ester           | 673        | 13          | 0-00-0     | mainlib | C16H30O4 | 286    |

## Benzenesulfonamide, N-ethyl-2-methyl-

1st Dimension R.T. = 1455.94  
2nd Dimension R.T. = 2.376  
Quant Mass(es) = 91  
S/N = 816.60  
Area = 340473  
Height = 31371  
Similarity = 800

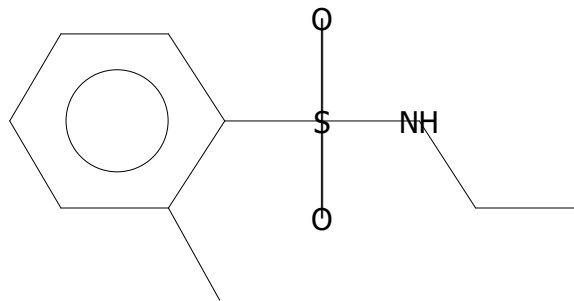

Peak Apex - sample "AerMBR A 092319 (20191119):1", peak 2065, at 1455.94 , 2.376 sec , sec (Spec # 1482 30)

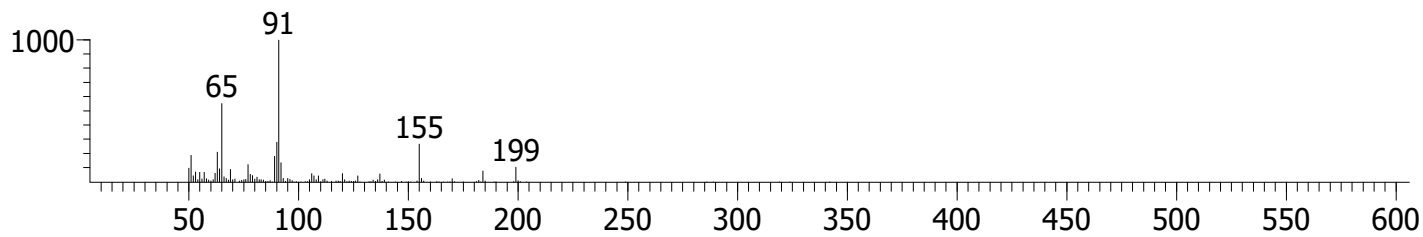

Peak True - sample "AerMBR A 092319 (20191119):1", peak 2065, at 1455.94 , 2.376 sec , sec (Spec # 1482 30)

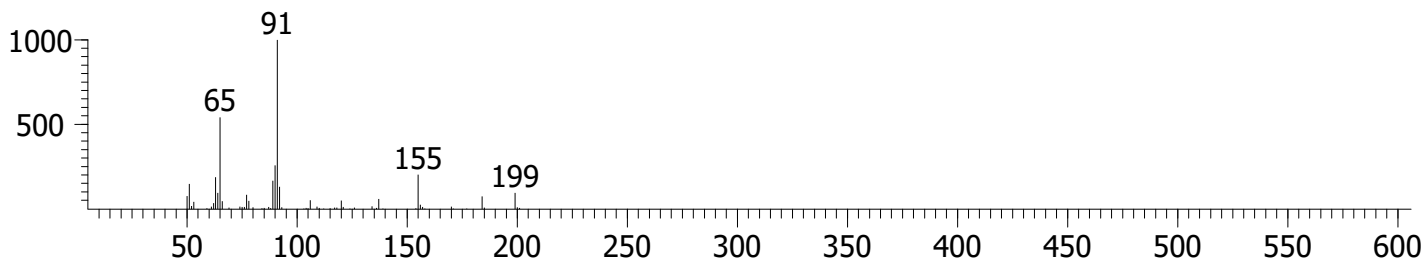

Library Hit - similarity 800, "Benzenesulfonamide, N-ethyl-2-methyl-"

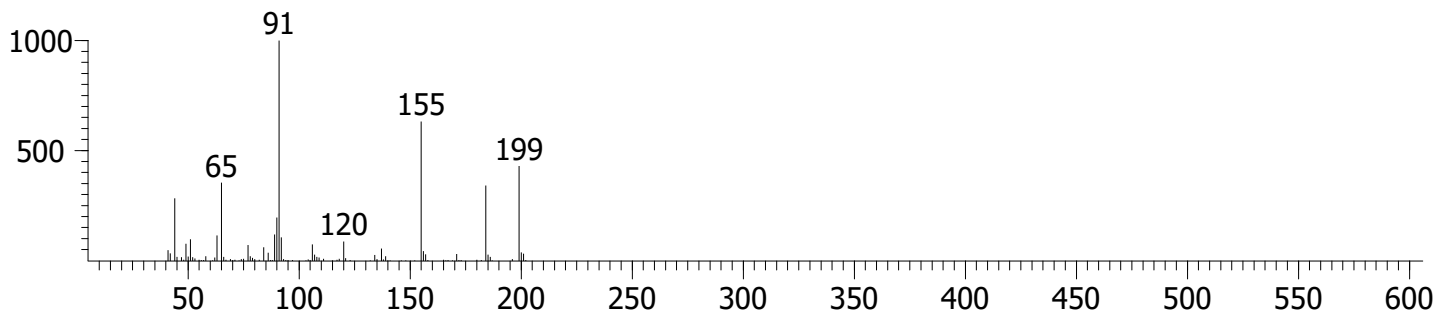

| Hit | Name                                                                  | Similarity | Probability | CAS       | Library | Formula     | Weight |
|-----|-----------------------------------------------------------------------|------------|-------------|-----------|---------|-------------|--------|
| 1   | Benzenesulfonamide, N-ethyl-2-methyl-                                 | 800        | 2512        | 1077-56-1 | mainlib | C9H13NO2S   | 199    |
| 2   | p-Toluenesulfonylacetonitrile                                         | 787        | 1622        | 5697-44-9 | mainlib | C9H9NO2S    | 195    |
| 3   | 2-(Toluene-4-sulfonyloxy)propionic acid                               | 773        | 1015        | 0-00-0    | mainlib | C10H12O5S   | 244    |
| 4   | Benzenesulfonyl chloride, 2-methyl-                                   | 756        | 554         | 133-59-5  | mainlib | C7H7ClO2S   | 190    |
| 5   | 4-Methyl-N-[2-(3-nitro-[1,2,4]triazol-1-yl)-ethyl]-benzenesulfonamide | 745        | 380         | 0-00-0    | mainlib | C11H13N5O4S | 311    |

## 2,7(1H,3H)-Naphthalenedione, hexahydro-

1st Dimension R.T. = 1462.94  
2nd Dimension R.T. = 1.874  
Quant Mass(es) = 166  
S/N = 617.91  
Area = 83103  
Height = 9824.8  
Similarity = 762

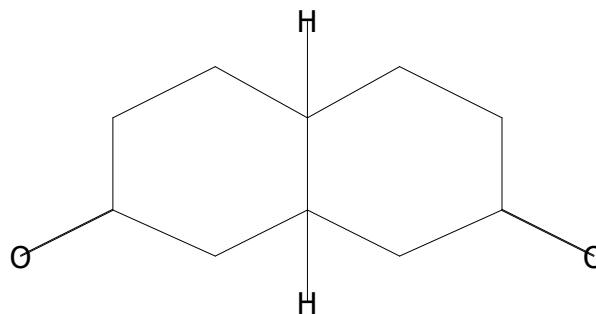

Peak Apex - sample "AerMBR A 092319 (20191119):1", peak 2078, at 1462.94 , 1.874 sec , sec (Spec # 1492 14)

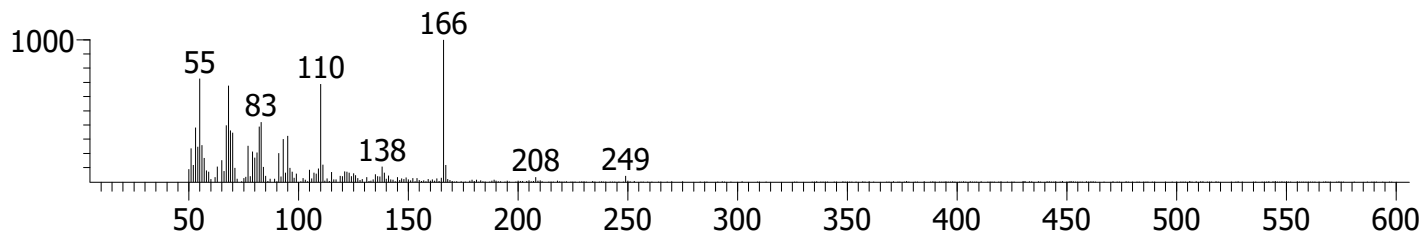

Peak True - sample "AerMBR A 092319 (20191119):1", peak 2078, at 1462.94 , 1.874 sec , sec (Spec # 1492 14)

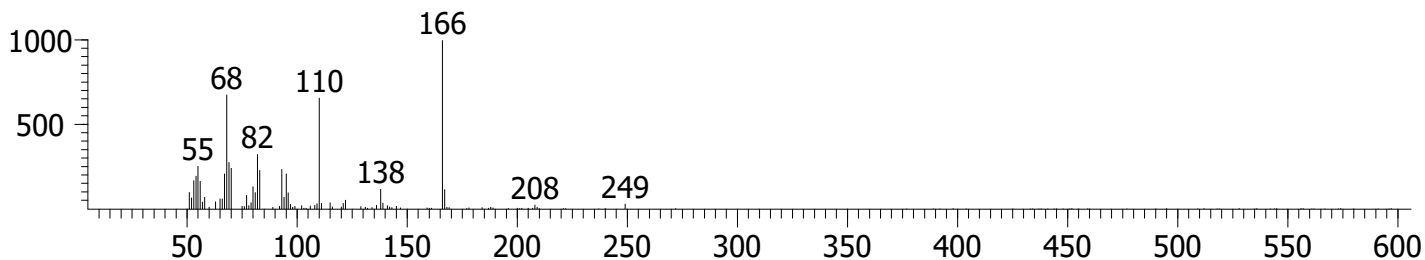

Library Hit - similarity 762, "2,7(1H,3H)-Naphthalenedione, hexahydro-"

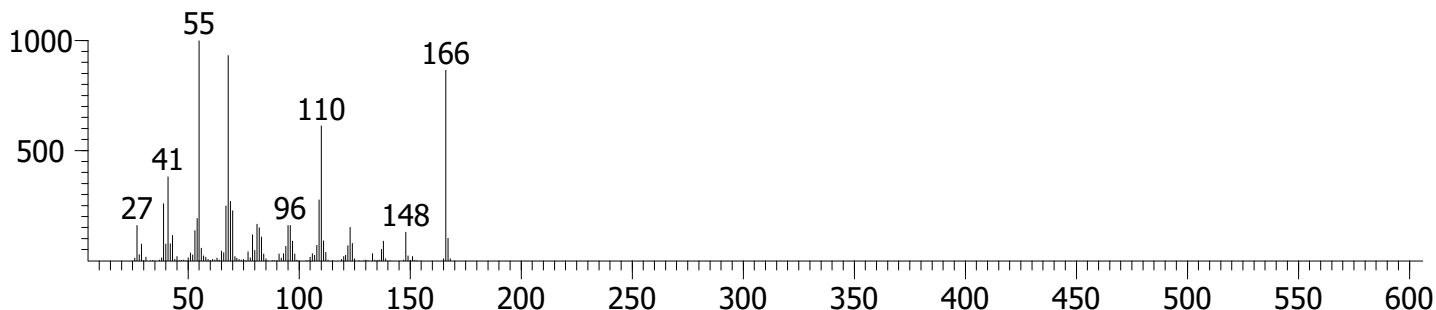

| Hit | Name                                                           | Similarity | Probability | CAS         | Library | Formula  | Weight |
|-----|----------------------------------------------------------------|------------|-------------|-------------|---------|----------|--------|
| 1   | 2,7(1H,3H)-Naphthalenedione, hexahydro-                        | 762        | 3941        | 46048-64-0  | mainlib | C10H14O2 | 166    |
| 2   | 3,6-Diazahomoadamantan-9-one                                   | 715        | 824         | 126126-45-2 | mainlib | C9H14N2O | 166    |
| 3   | 11-Oxadispiro[4.0.4.1]undecan-1-one                            | 698        | 450         | 36803-49-3  | mainlib | C10H14O2 | 166    |
| 4   | 3,5-Dibutylhexahydro-1H-pyrrolizine                            | 695        | 397         | 150044-83-0 | mainlib | C15H29N  | 223    |
| 5   | (1R,4R,9aS)-1-Ethyl-4-(pent-4-en-1-yl)octahydro-1H-quinolizine | 684        | 272         | 957792-07-3 | mainlib | C16H29N  | 235    |



## Benzenesulfonamide, 4-methyl-

1st Dimension R.T. = 1476.93  
2nd Dimension R.T. = 2.633  
Quant Mass(es) = 171  
S/N = 213.15  
Area = 43637  
Height = 3786.4  
Similarity = 848

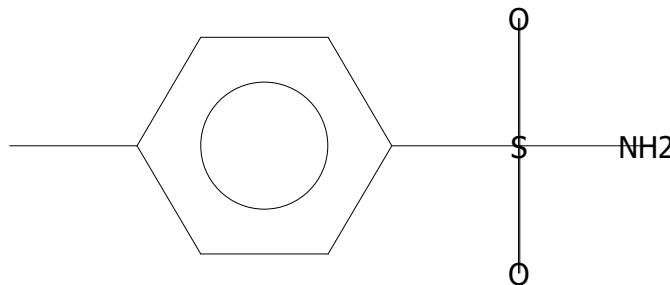

Peak Apex - sample "AerMBR A 092319 (20191119):1", peak 2120, at 1476.93 , 2.633 sec , sec (Spec # 1514 49)

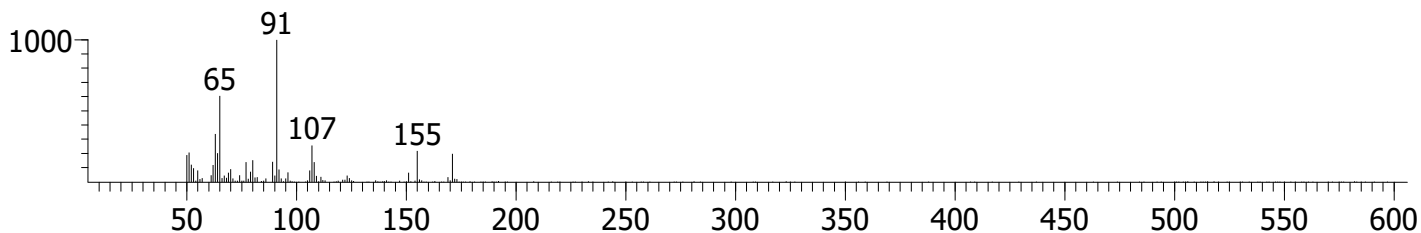

Peak True - sample "AerMBR A 092319 (20191119):1", peak 2120, at 1476.93 , 2.633 sec , sec (Spec # 1514 49)

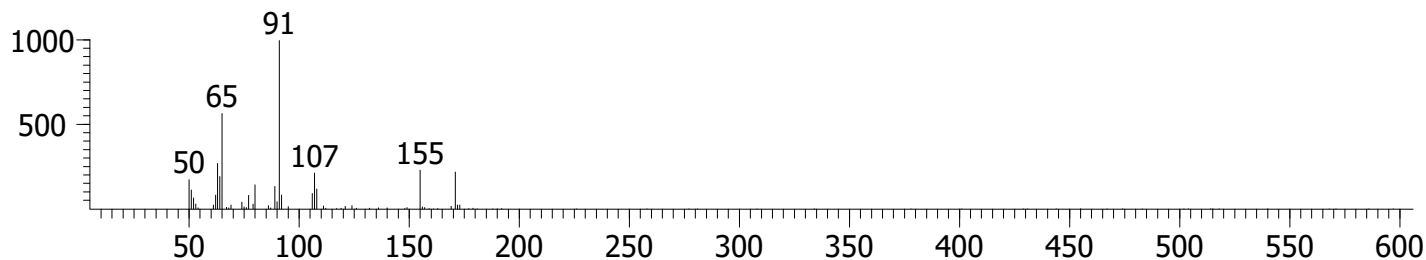

Library Hit - similarity 848, "Benzenesulfonamide, 4-methyl-"

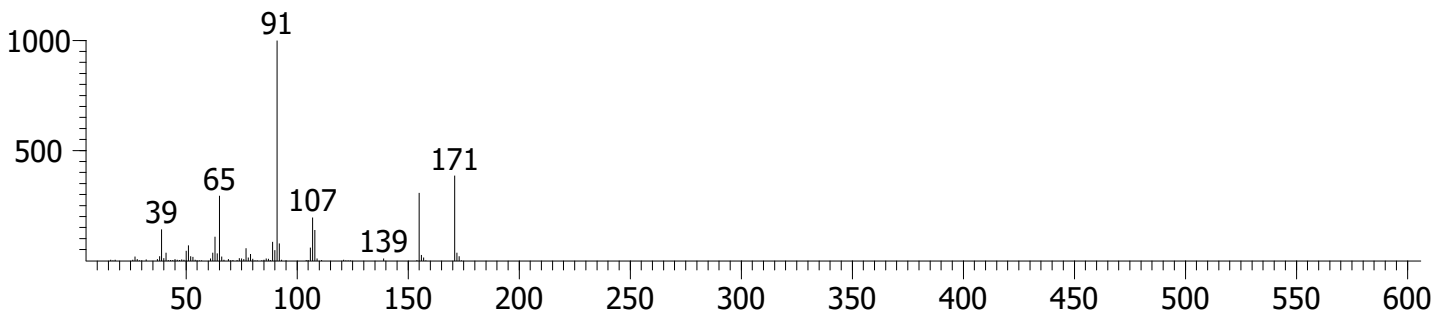

| Hit | Name                                                                               | Similarity | Probability | CAS     | Library | Formula      | Weight |
|-----|------------------------------------------------------------------------------------|------------|-------------|---------|---------|--------------|--------|
| 1   | O-p-toluenesulfonyl-N-acetylserine, methyl ester                                   | 888        | 5431        | 0-00-0  | mainlib | C13H17NO6S   | 315    |
| 2   | N-p-toluenesulfonyl-L-threonine, benzyl ester                                      | 866        | 2147        | 0-00-0  | mainlib | C18H21NO5S   | 363    |
| 3   | Benzenesulfonamide, 4-methyl-                                                      | 848        | 1107        | 70-55-3 | mainlib | C7H9NO2S     | 171    |
| 4   | Thiosulfuric acid, S-[2-[3-(4-methylbenzenesulfonamido)propionamidino]ethyl] ester | 844        | 935         | 0-00-0  | mainlib | C12H19N3O5S3 | 381    |
| 5   | N3, Nà-bis*(ptoluenesulfonyl)histidineamide                                        | 799        | 199         | 0-00-0  | mainlib | C20H22N4O5S2 | 462    |

## Tri(2-chloroethyl) phosphate

1st Dimension R.T. = 1560.88

2nd Dimension R.T. = 2.237

Quant Mass(es) = 63

S/N = 2556.4

Area = 863582

Height = 71990

Similarity = 907

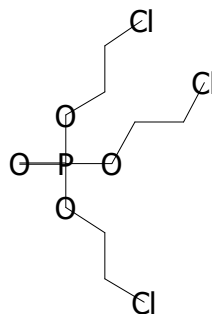

Peak Apex - sample "AerMBR A 092319 (20191119):1", peak 2310, at 1560.88 , 2.237 sec , sec (Spec # 1641 09)

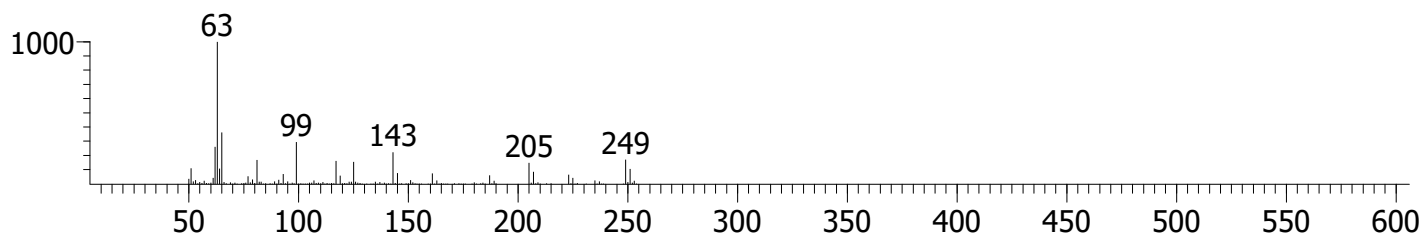

Peak True - sample "AerMBR A 092319 (20191119):1", peak 2310, at 1560.88 , 2.237 sec , sec (Spec # 1641 09)

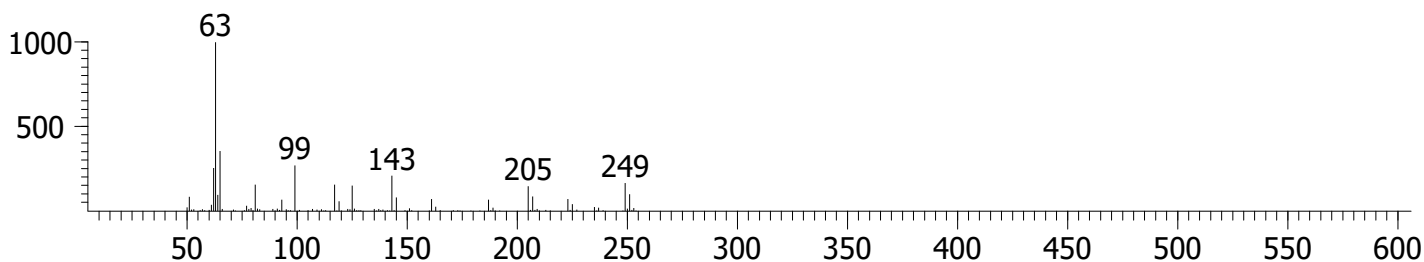

Library Hit - similarity 907, "Tri(2-chloroethyl) phosphate"

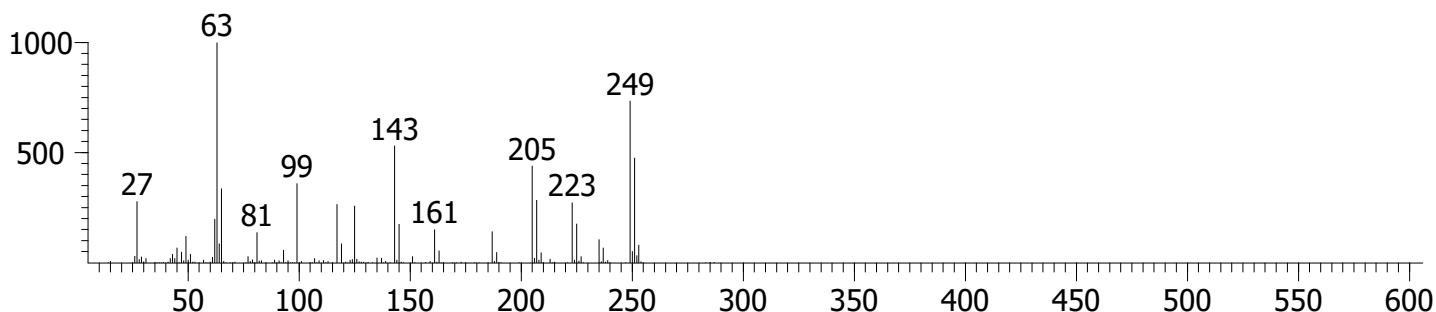

| Hit | Name                                                          | Similarity | Probability | CAS         | Library | Formula       | Weight |
|-----|---------------------------------------------------------------|------------|-------------|-------------|---------|---------------|--------|
| 1   | Tri(2-chloroethyl) phosphate                                  | 907        | 9880        | 115-96-8    | mainlib | C6H12Cl3O4P   | 284    |
| 2   | Phosphoric acid, 1,2-ethanediyl tetrakis(2-chloroethyl) ester | 666        | 98          | 33125-86-9  | mainlib | C10H20Cl4O8P2 | 470    |
| 3   | 2-(2-Chloroethoxy)ethyl bis(2-chloroethyl) phosphate          | 602        | 16          | 137888-36-9 | mainlib | C8H16Cl3O5P   | 328    |
| 4   | 1-Chloroethyl sulfone                                         | 525        | 1           | 10038-07-0  | mainlib | C4H8Cl2O2S    | 190    |
| 5   | 4-Bromo-3-chloroacetanilide                                   | 463        | 0           | 22459-81-0  | mainlib | C8H7BrClNO    | 247    |

## 3,5-di-tert-Butyl-4-hydroxybenzaldehyde

1st Dimension R.T. = 1567.88  
2nd Dimension R.T. = 1.789  
Quant Mass(es) = 219  
S/N = 1732.2  
Area = 116008  
Height = 13254  
Similarity = 876

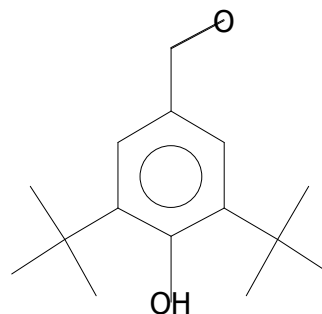

Peak Apex - sample "AerMBR A 092319 (20191119):1", peak 2321, at 1567.88 , 1.789 sec , sec (Spec # 1651 01)

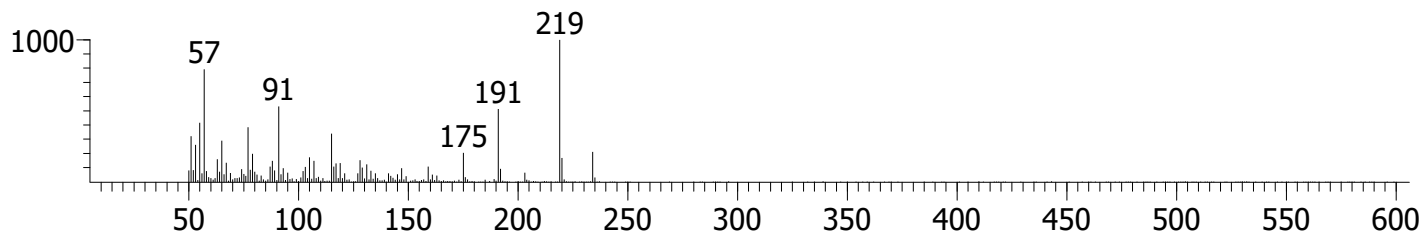

Peak True - sample "AerMBR A 092319 (20191119):1", peak 2321, at 1567.88 , 1.789 sec , sec (Spec # 1651 01)

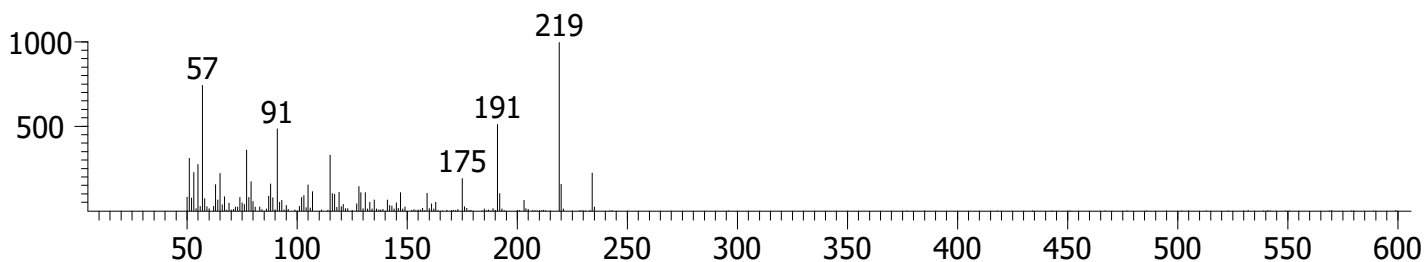

Library Hit - similarity 876, "3,5-di-tert-Butyl-4-hydroxybenzaldehyde"

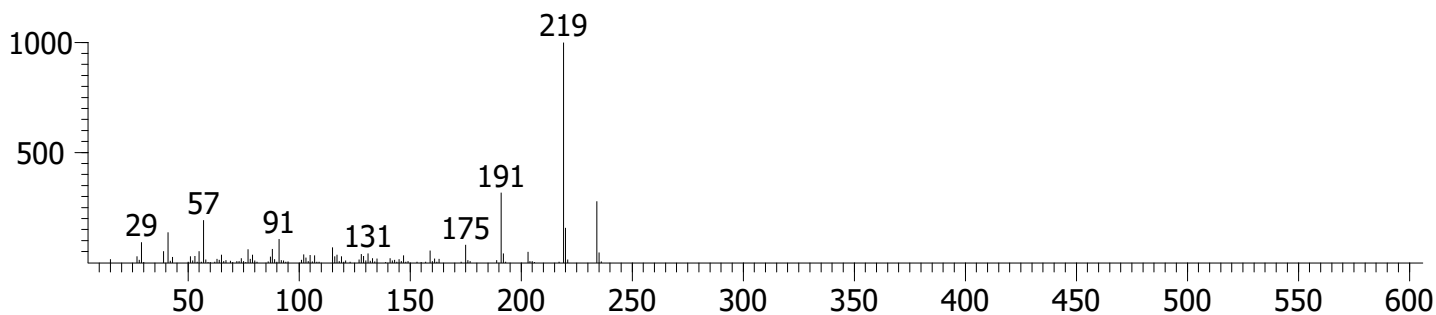

| Hit | Name                                                                  | Similarity | Probability | CAS         | Library | Formula  | Weight |
|-----|-----------------------------------------------------------------------|------------|-------------|-------------|---------|----------|--------|
| 1   | 3,5-di-tert-Butyl-4-hydroxybenzaldehyde                               | 876        | 7274        | 1620-98-0   | mainlib | C15H22O2 | 234    |
| 2   | 2,3,5,6-Detetrahydrocyclohexanone, 2,6-di-t-butyl-4-hydroxymethylene- | 850        | 2179        | 101100-38-3 | mainlib | C15H22O2 | 234    |
| 3   | Phenol, 2,6-bis(1,1-dimethylethyl)-4-ethyl-                           | 789        | 379         | 4130-42-1   | mainlib | C16H26O  | 234    |
| 4   | 3,5-Di-tert-butylbenzoic acid                                         | 764        | 115         | 16225-26-6  | mainlib | C15H22O2 | 234    |
| 5   | 3,5-Di-tert-butyl-2-hydroxybenzaldehyde                               | 707        | 21          | 37942-07-7  | mainlib | C15H22O2 | 234    |

## Benzyl Benzoate

1st Dimension R.T. = 1571.38

2nd Dimension R.T. = 2.119

Quant Mass(es) = 105

S/N = 252.15

Area = 87748

Height = 7129.9

Similarity = 849

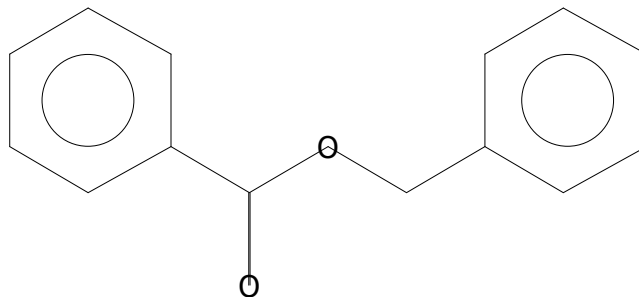

Peak Apex - sample "AerMBR A 092319 (20191119):1", peak 2331, at 1571.38 , 2.119 sec , sec (Spec # 1656 81)

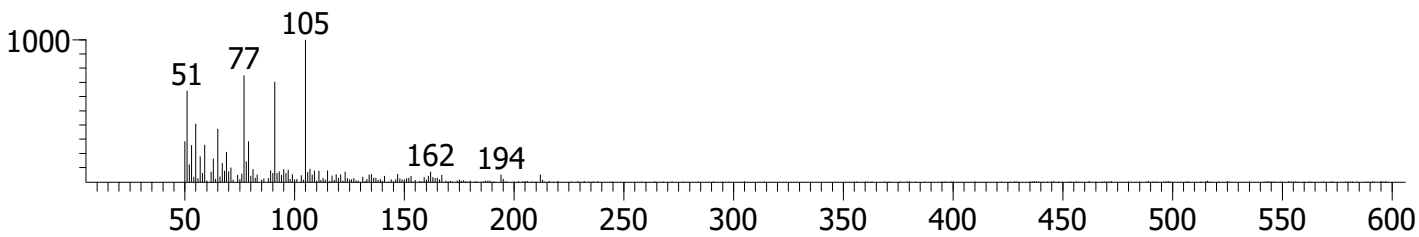

Peak True - sample "AerMBR A 092319 (20191119):1", peak 2331, at 1571.38 , 2.119 sec , sec (Spec # 1656 81)

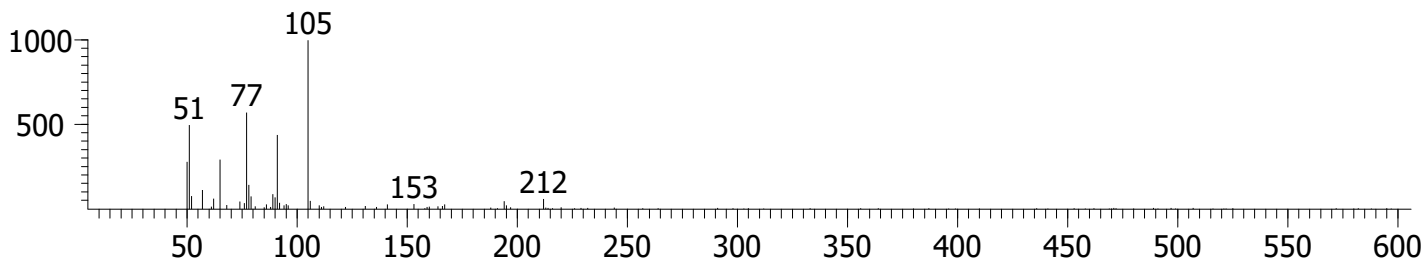

Library Hit - similarity 849, "Benzyl Benzoate"

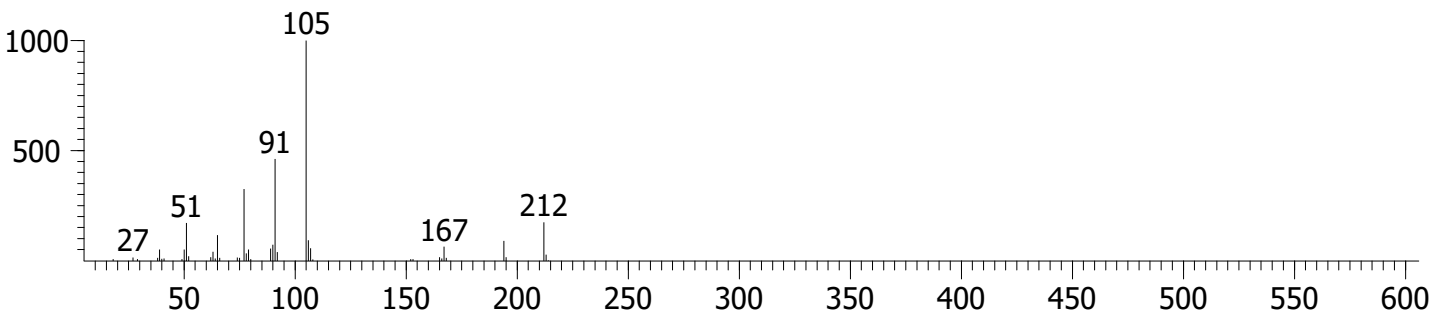

| Hit | Name                                                   | Similarity | Probability | CAS        | Library | Formula   | Weight |
|-----|--------------------------------------------------------|------------|-------------|------------|---------|-----------|--------|
| 1   | Benzyl Benzoate                                        | 849        | 4021        | 120-51-4   | mainlib | C14H12O2  | 212    |
| 2   | Ethanone, 1-phenyl-2-(4H-1,2,4-triazol-3-ylthio)-      | 777        | 560         | 32189-00-7 | mainlib | C10H9N3OS | 219    |
| 3   | Acetic acid, 2-benzoylthio-, 2-oxo-2-phenylethyl ester | 773        | 473         | 0-00-0     | mainlib | C17H14O4S | 314    |
| 4   | Ethanone, 2-bromo-1-phenyl-                            | 772        | 454         | 70-11-1    | mainlib | C8H7BrO   | 198    |
| 5   | 7-Benzoyloxybicyclo[2.2.1]hepta-2,5-diene              | 765        | 348         | 4796-68-3  | mainlib | C14H12O2  | 212    |

## 2-Propanol, 1-chloro-, phosphate (3:1)

1st Dimension R.T. = 1599.36

2nd Dimension R.T. = 1.947

Quant Mass(es) = 99

S/N = 5564.6

Area = 1289369

Height = 120801

Similarity = 779

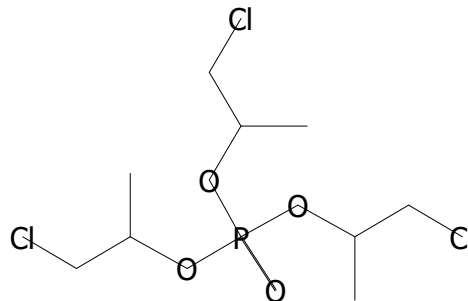

Peak Apex - sample "AerMBR A 092319 (20191119):1", peak 2390, at 1599.36 , 1.947 sec , sec (Spec # 1698 95)

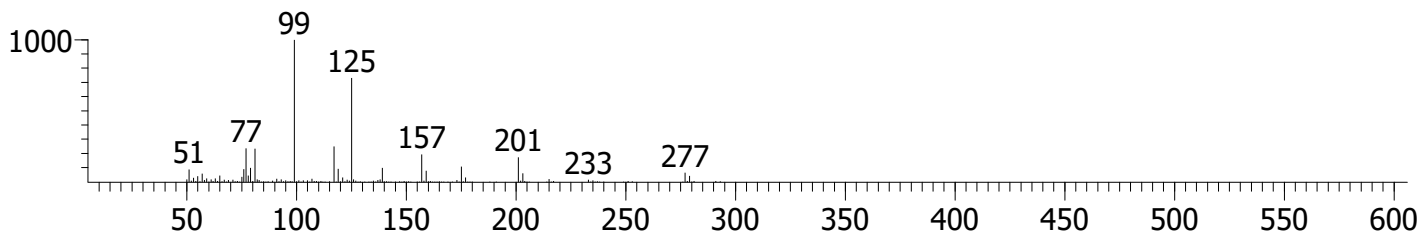

Peak True - sample "AerMBR A 092319 (20191119):1", peak 2390, at 1599.36 , 1.947 sec , sec (Spec # 1698 95)

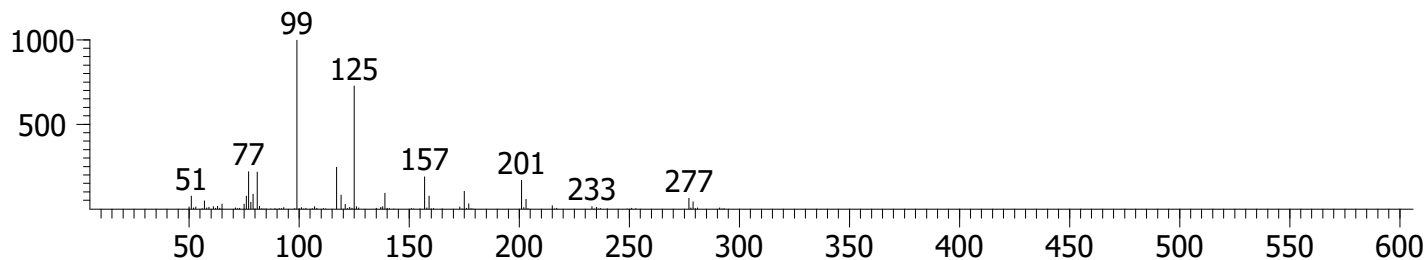

Library Hit - similarity 779, "2-Propanol, 1-chloro-, phosphate (3:1)"

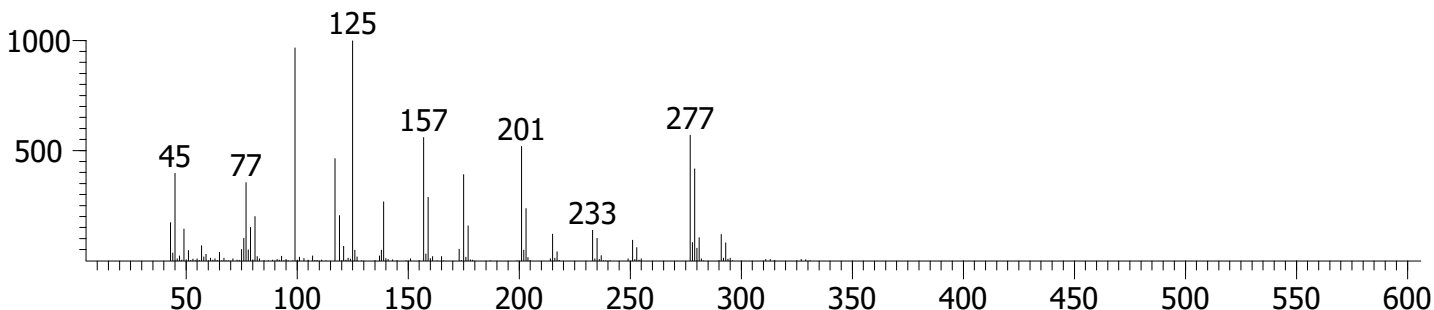

| Hit | Name                                               | Similarity | Probability | CAS         | Library | Formula     | Weight |
|-----|----------------------------------------------------|------------|-------------|-------------|---------|-------------|--------|
| 1   | 2-Propanol, 1-chloro-, phosphate (3:1)             | 779        | 4654        | 13674-84-5  | mainlib | C9H18Cl3O4P | 326    |
| 2   | Bis(1-chloro-2-propyl)(3-chloro-1-propyl)phosphate | 776        | 4112        | 137909-40-1 | mainlib | C9H18Cl3O4P | 326    |
| 3   | Bis(3-chloro-1-propyl)(1-chloro-2-propyl)phosphate | 718        | 757         | 137888-35-8 | mainlib | C9H18Cl3O4P | 326    |
| 4   | Tris(3-chloropropyl) phosphate                     | 702        | 436         | 1067-98-7   | mainlib | C9H18Cl3O4P | 326    |
| 5   | 2-Butyl methylphosphonofluoridate                  | 589        | 26          | 352-52-3    | mainlib | C5H12FO2P   | 154    |

# Phenanthrene

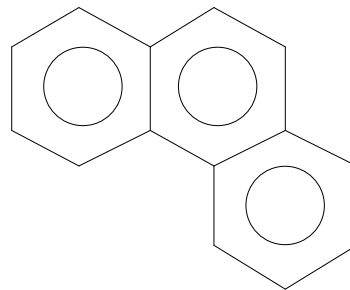

1st Dimension R.T. = 1599.36

2nd Dimension R.T. = 2.284

Quant Mass(es) = 178

S/N = 1514.5

Area = 231887

Height = 21763

Similarity = 952

Peak Apex - sample "AerMBR A 092319 (20191119):1", peak 2394, at 1599.36 , 2.284 sec , sec (Spec # 1699 46)

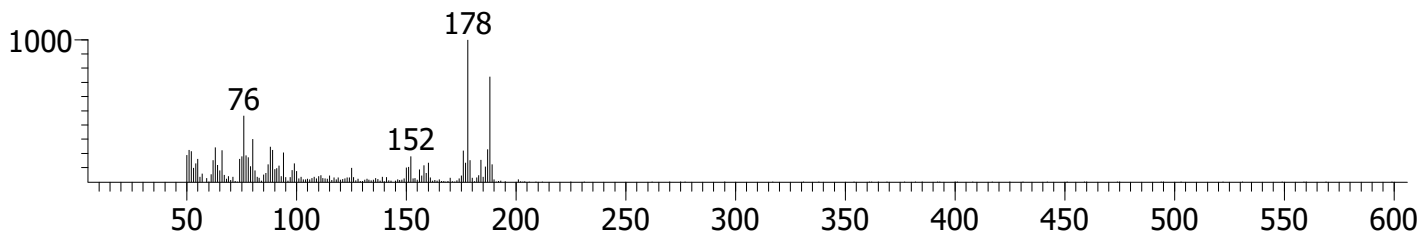

Peak True - sample "AerMBR A 092319 (20191119):1", peak 2394, at 1599.36 , 2.284 sec , sec (Spec # 1699 46)

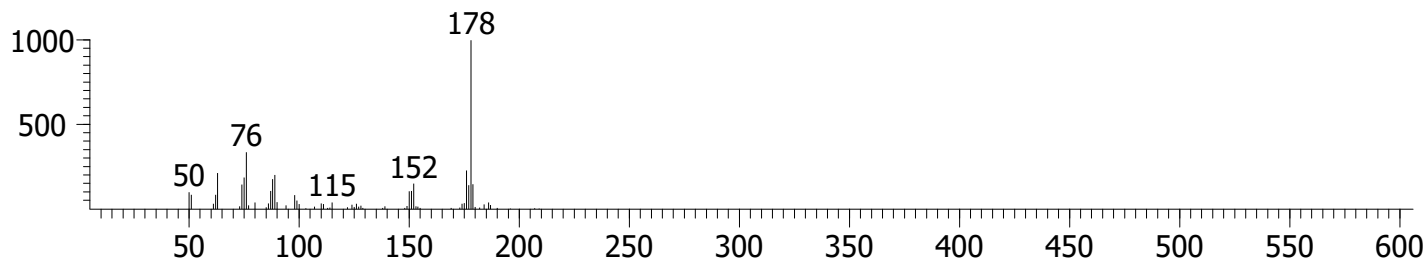

Library Hit - similarity 952, "Phenanthrene"

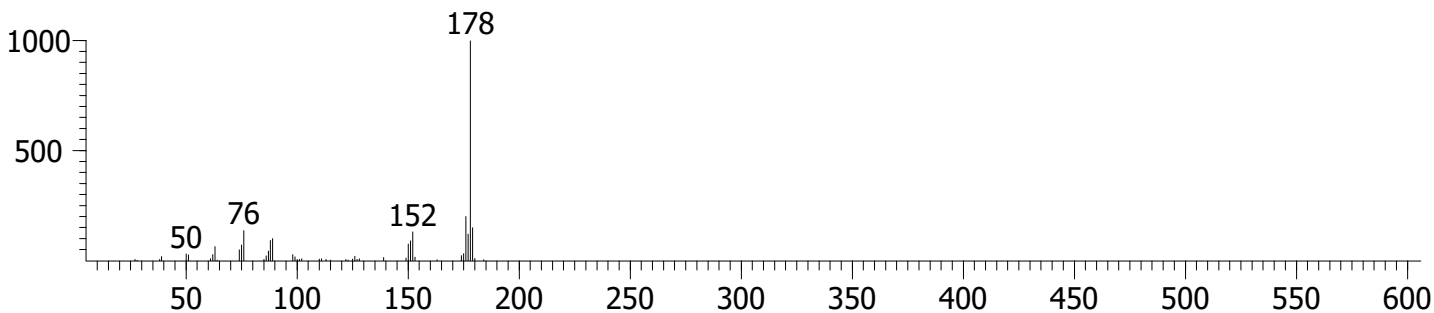

| Hit | Name                                        | Similarity | Probability | CAS        | Library | Formula | Weight |
|-----|---------------------------------------------|------------|-------------|------------|---------|---------|--------|
| 1   | Phenanthrene                                | 952        | 5659        | 85-01-8    | mainlib | C14H10  | 178    |
| 2   | 9H-Fluorene, 9-methylene-                   | 915        | 1377        | 4425-82-5  | mainlib | C14H10  | 178    |
| 3   | 2-Biphenylacetylene                         | 904        | 944         | 52889-62-0 | mainlib | C14H10  | 178    |
| 4   | Anthracene                                  | 880        | 316         | 120-12-7   | mainlib | C14H10  | 178    |
| 5   | 7,8-Diphenylbicyclo[4.2.1]nona-2,4,7-triene | 877        | 279         | 54049-09-1 | mainlib | C21H18  | 270    |

Carbamic acid,  
(3-chloro-4-hydroxyphenyl)-, 1-methylethyl

1st Dimension R.T. = 1606.36  
2nd Dimension R.T. = 2.033  
Quant Mass(es) = 143  
S/N = 111.77  
Area = 21691  
Height = 2016.0  
Similarity = 613

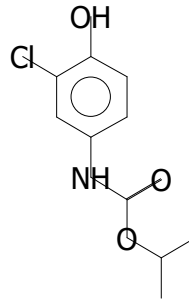

Peak Apex - sample "AerMBR A 092319 (20191119):1", peak 2407, at 1606.36 , 2.033 sec , sec (Spec # 1709 68)

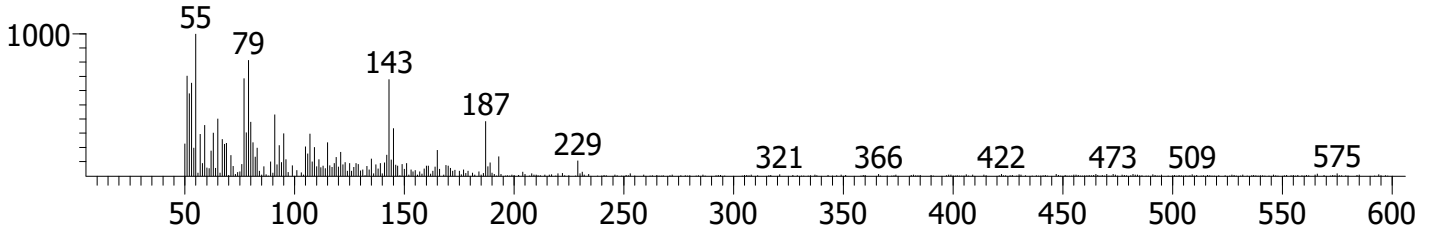

Peak True - sample "AerMBR A 092319 (20191119):1", peak 2407, at 1606.36 , 2.033 sec , sec (Spec # 1709 68)

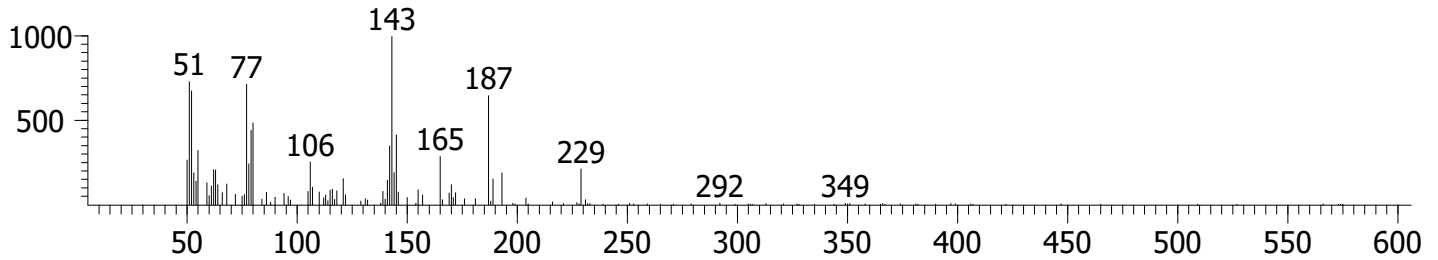

Library Hit - similarity 613, "Carbamic acid, (3-chloro-4-hydroxyphenyl)-, 1-methylethyl ester"

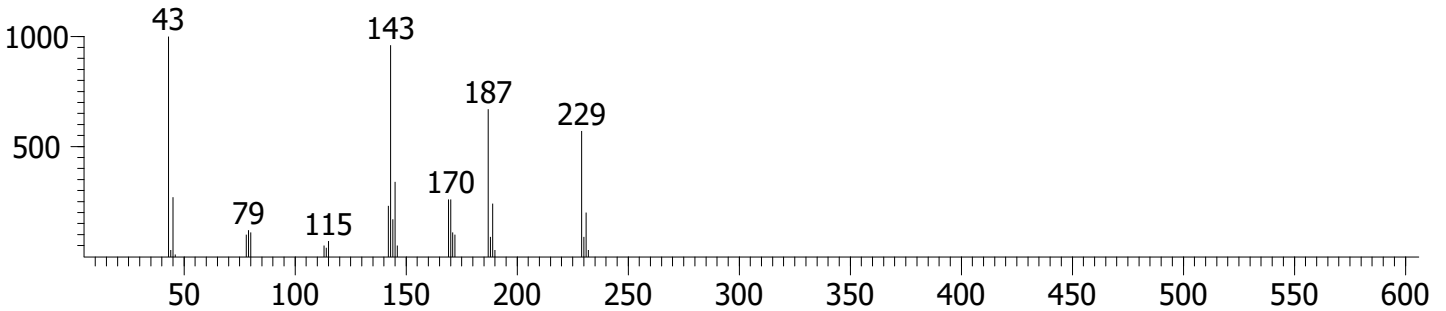

| Hit | Name                                                                    | Similarity | Probability | CAS        | Library | Formula     | Weight |
|-----|-------------------------------------------------------------------------|------------|-------------|------------|---------|-------------|--------|
| 1   | Carbamic acid, (3-chloro-4-hydroxyphenyl)-, 1-methylethyl ester         | 613        | 3761        | 28705-96-6 | mainlib | C10H12ClNO3 | 229    |
| 2   | Cyclohex-3-en-2-one-1-carboxylic acid, 3-chloro-1-methyl-, methyl ester | 601        | 2505        | 0-00-0     | mainlib | C9H11ClO3   | 202    |
| 3   | Carbamic acid, (5-chloro-2-hydroxyphenyl)-, 1-methylethyl ester         | 548        | 495         | 27898-06-2 | mainlib | C10H12ClNO3 | 229    |
| 4   | Carbamic acid, (3-chloro-5-hydroxyphenyl)-, 1-methylethyl ester         | 537        | 339         | 34061-87-5 | mainlib | C10H12ClNO3 | 229    |
| 5   | acetamide, N-(3-chloro-4-hydroxyphenyl)-                                | 534        | 300         | 0-00-0     | mainlib | C8H8ClNO2   | 185    |

# Benzene, 1,1'-[1,2-ethanediylbis(oxy)]bis-

1st Dimension R.T. = 1606.36  
2nd Dimension R.T. = 2.079  
Quant Mass(es) = 214  
S/N = 63.990  
Area = 2233.7  
Height = 259.51  
Similarity = 718

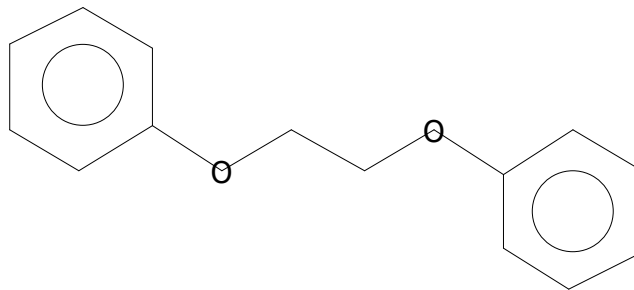

Peak Apex - sample "AerMBR A 092319 (20191119):1", peak 2408, at 1606.36 , 2.079 sec , sec (Spec # 1709 75)

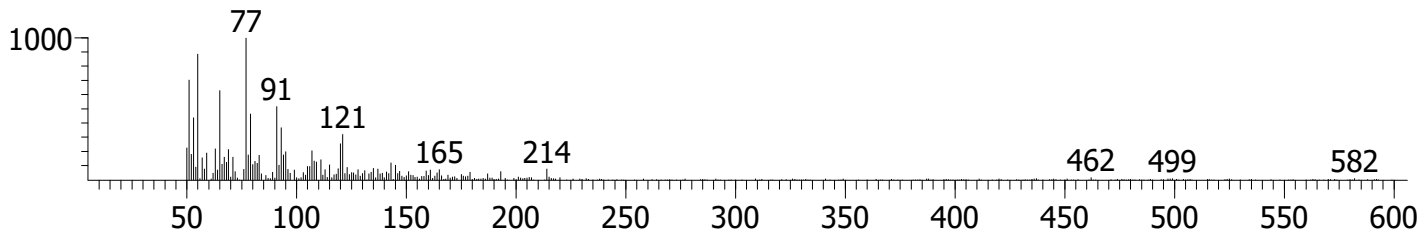

Peak True - sample "AerMBR A 092319 (20191119):1", peak 2408, at 1606.36 , 2.079 sec , sec (Spec # 1709 75)

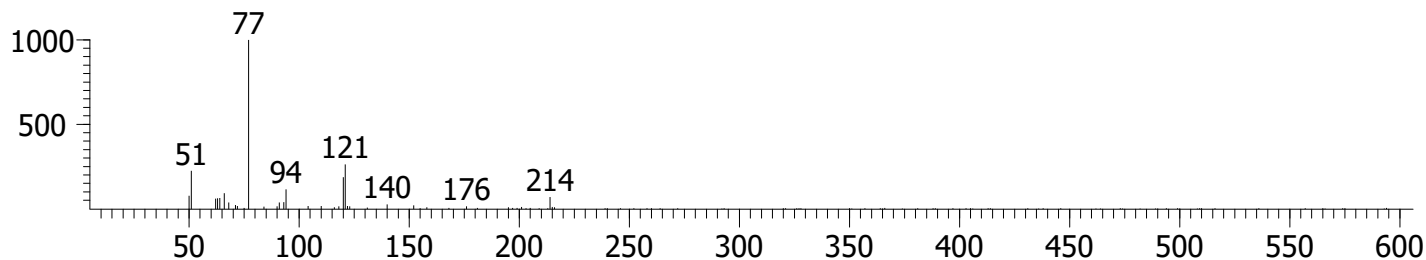

Library Hit - similarity 718, "Benzene, 1,1'-[1,2-ethanediylbis(oxy)]bis-"

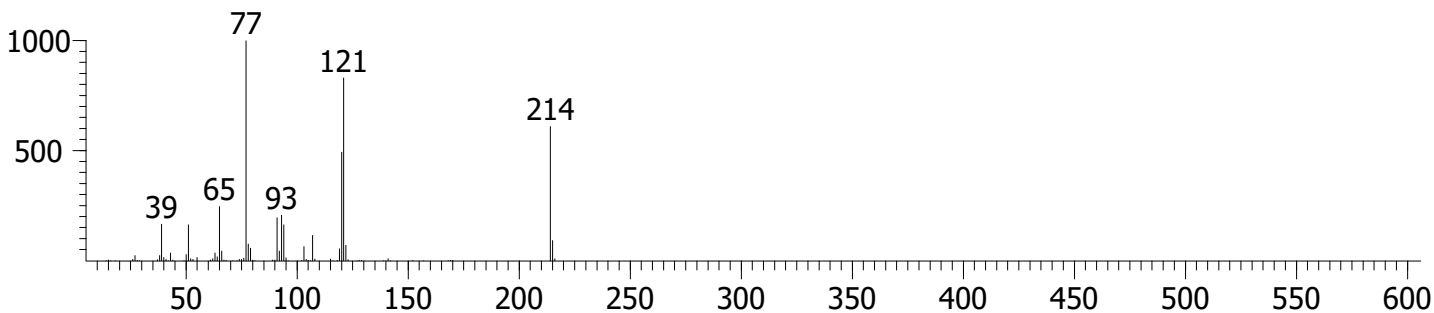

| Hit | Name                                                            | Similarity | Probability | CAS         | Library | Formula                                          | Weight |
|-----|-----------------------------------------------------------------|------------|-------------|-------------|---------|--------------------------------------------------|--------|
| 1   | Benzene, 1,1'-[1,2-ethanediylbis(oxy)]bis-                      | 718        | 6204        | 104-66-5    | mainlib | C <sub>14</sub> H <sub>14</sub> O <sub>2</sub>   | 214    |
| 2   | Propanoyl chloride, 2-phenoxy-                                  | 679        | 1462        | 122-35-0    | mainlib | C <sub>9</sub> H <sub>9</sub> ClO <sub>2</sub>   | 184    |
| 3   | 6-(Dimethylamino)fulvene                                        | 659        | 666         | 696-68-4    | mainlib | C <sub>8</sub> H <sub>11</sub> N                 | 121    |
| 4   | Chloroacetic acid, 4-methoxybenzyl ester                        | 645        | 417         | 164011-15-8 | mainlib | C <sub>10</sub> H <sub>11</sub> ClO <sub>3</sub> | 214    |
| 5   | Benzene, 1,1'-[oxybis(2,1-ethanediyloxy-2,1-ethanediyloxy)]bis- | 637        | 311         | 20768-77-8  | mainlib | C <sub>20</sub> H <sub>26</sub> O <sub>5</sub>   | 346    |



## Benzene, (1-butylonyl)-

1st Dimension R.T. = 1623.85  
2nd Dimension R.T. = 1.386  
Quant Mass(es) = 91  
S/N = 210.50  
Area = 66469  
Height = 8641.0  
Similarity = 895

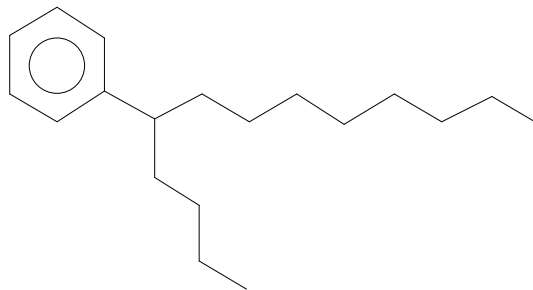

Peak Apex - sample "AerMBR A 092319 (20191119):1", peak 2439, at 1623.85 , 1.386 sec , sec (Spec # 1735 20)

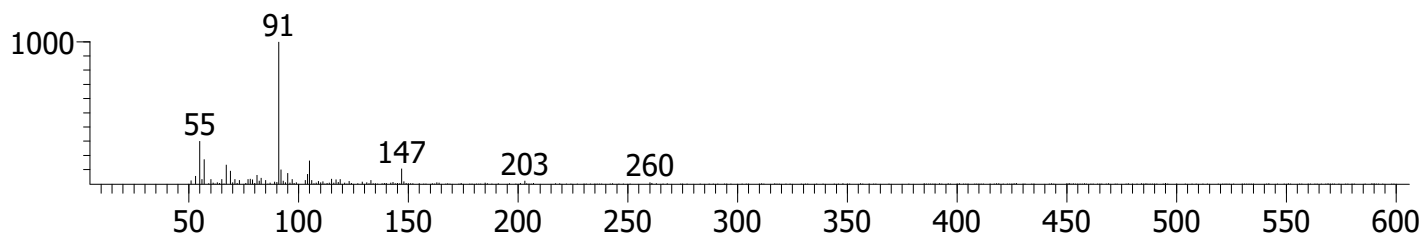

Peak True - sample "AerMBR A 092319 (20191119):1", peak 2439, at 1623.85 , 1.386 sec , sec (Spec # 1735 20)

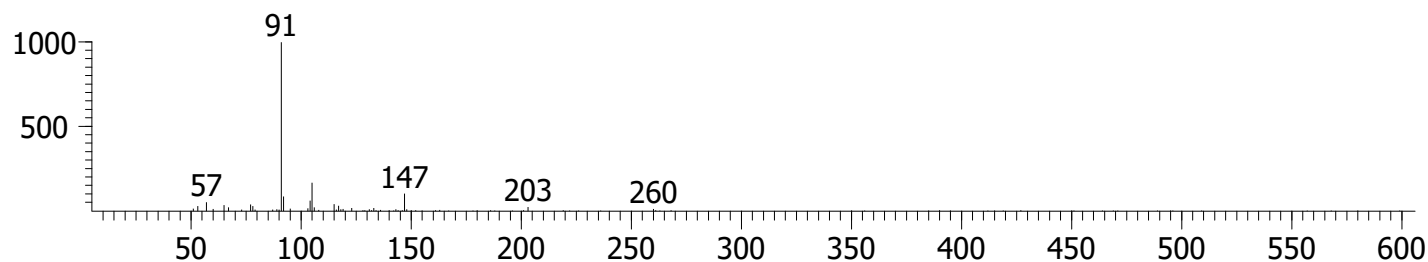

Library Hit - similarity 895, "Benzene, (1-butylonyl)-"

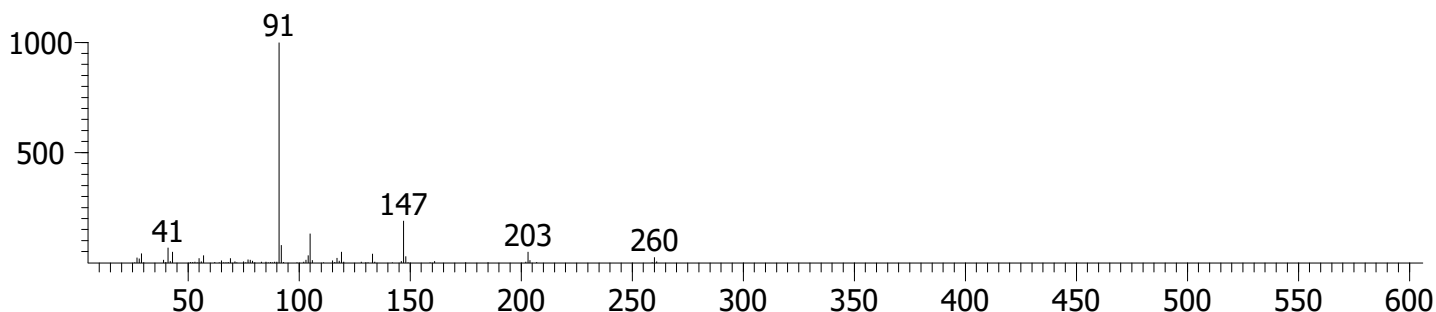

| Hit | Name                                                                           | Similarity | Probability | CAS        | Library | Formula   | Weight |
|-----|--------------------------------------------------------------------------------|------------|-------------|------------|---------|-----------|--------|
| 1   | Benzene, (1-butylonyl)-                                                        | 895        | 4619        | 4534-50-3  | mainlib | C19H32    | 260    |
| 2   | Benzene, (1-butylheptyl)-                                                      | 884        | 3168        | 4537-15-9  | mainlib | C17H28    | 232    |
| 3   | 3-Benzoyl-8-oxo-6-azabicyclo[3.2.1]octan-6,7-dicarboxylic acid, dibenzyl ester | 847        | 771         | 0-00-0     | mainlib | C30H27NO6 | 497    |
| 4   | Benzene, (3-iodo-2,2-dimethylpropyl)-                                          | 812        | 193         | 40548-64-9 | mainlib | C11H15I   | 274    |
| 5   | Hexanal benzyl hexyl acetal                                                    | 810        | 178         | 0-00-0     | mainlib | C19H32O2  | 292    |

## Acridine

1st Dimension R.T. = 1623.85  
2nd Dimension R.T. = 2.376  
Quant Mass(es) = 179  
S/N = 664.38  
Area = 96327  
Height = 8713.4  
Similarity = 918

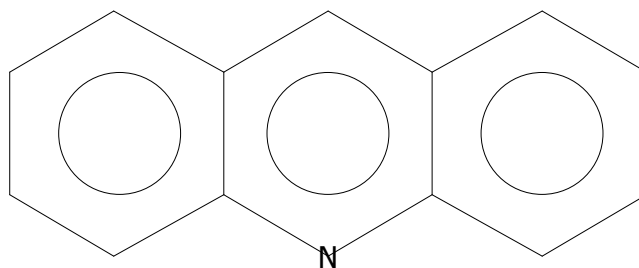

Peak Apex - sample "AerMBR A 092319 (20191119):1", peak 2443, at 1623.85 , 2.376 sec , sec (Spec # 1736 70)

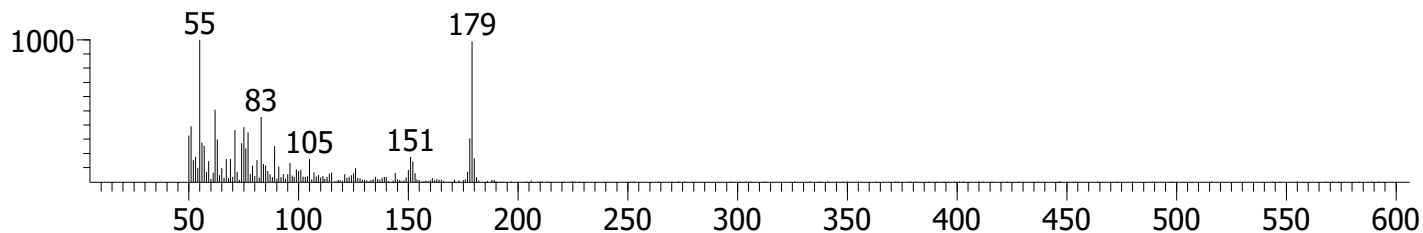

Peak True - sample "AerMBR A 092319 (20191119):1", peak 2443, at 1623.85 , 2.376 sec , sec (Spec # 1736 70)

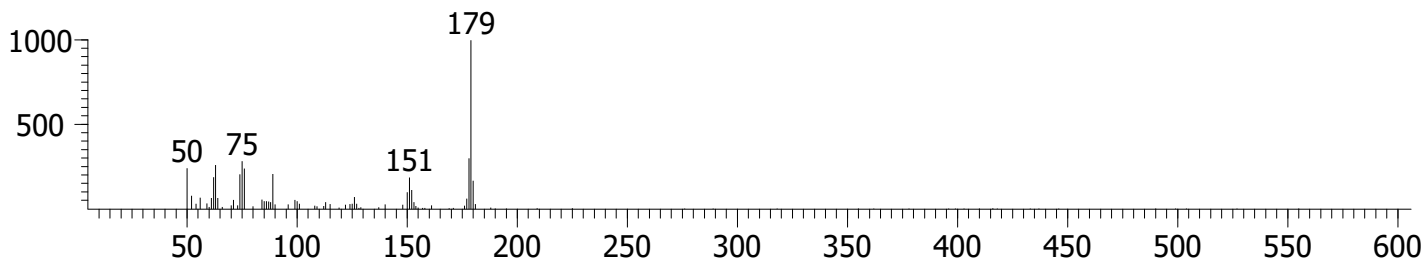

Library Hit - similarity 918, "Acridine"

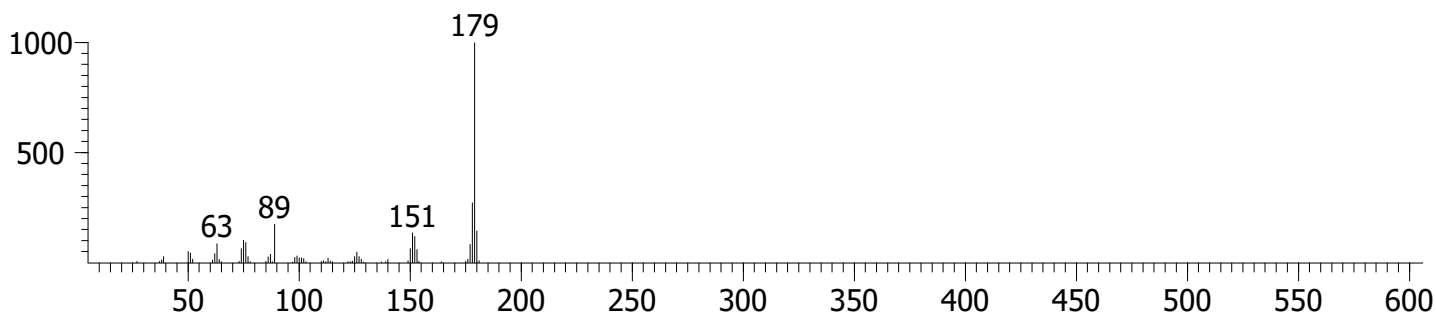

| Hit | Name               | Similarity | Probability | CAS       | Library | Formula | Weight |
|-----|--------------------|------------|-------------|-----------|---------|---------|--------|
| 1   | Acridine           | 918        | 6103        | 260-94-6  | mainlib | C13H9N  | 179    |
| 2   | Benzo[f]quinoline  | 891        | 1795        | 85-02-9   | mainlib | C13H9N  | 179    |
| 3   | Phenanthridine     | 868        | 655         | 229-87-8  | mainlib | C13H9N  | 179    |
| 4   | p-Phenylbenzotrile | 849        | 318         | 2920-38-9 | mainlib | C13H9N  | 179    |
| 5   | Benzo[h]quinoline  | 844        | 256         | 230-27-3  | mainlib | C13H9N  | 179    |

# Indole-5-aldehyde

1st Dimension R.T. = 1634.34  
2nd Dimension R.T. = 2.891  
Quant Mass(es) = 144  
S/N = 144.63  
Area = 13349  
Height = 1202.0  
Similarity = 866

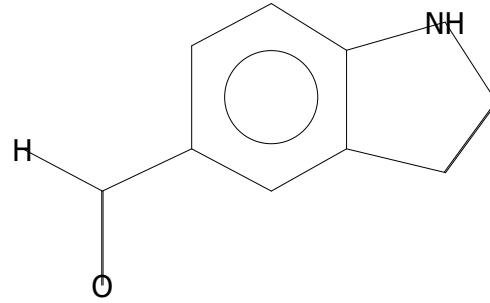

Peak Apex - sample "AerMBR A 092319 (20191119):1", peak 2463, at 1634.34 , 2.891 sec , sec (Spec # 1753 38)

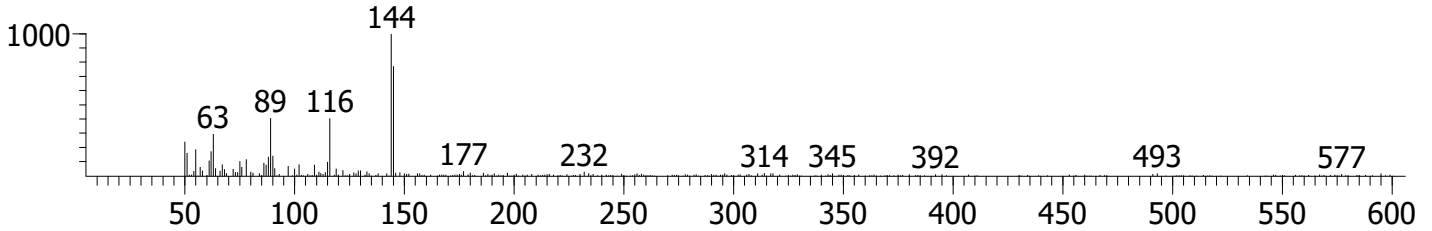

Peak True - sample "AerMBR A 092319 (20191119):1", peak 2463, at 1634.34 , 2.891 sec , sec (Spec # 1753 38)

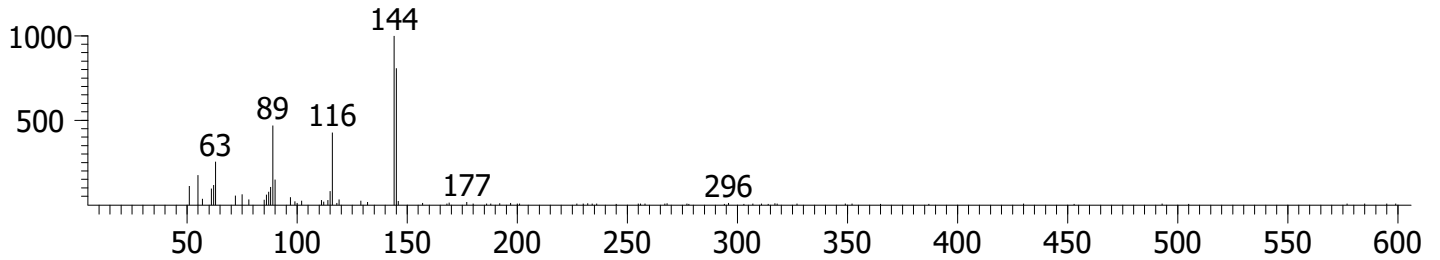

Library Hit - similarity 866, "Indole-5-aldehyde"

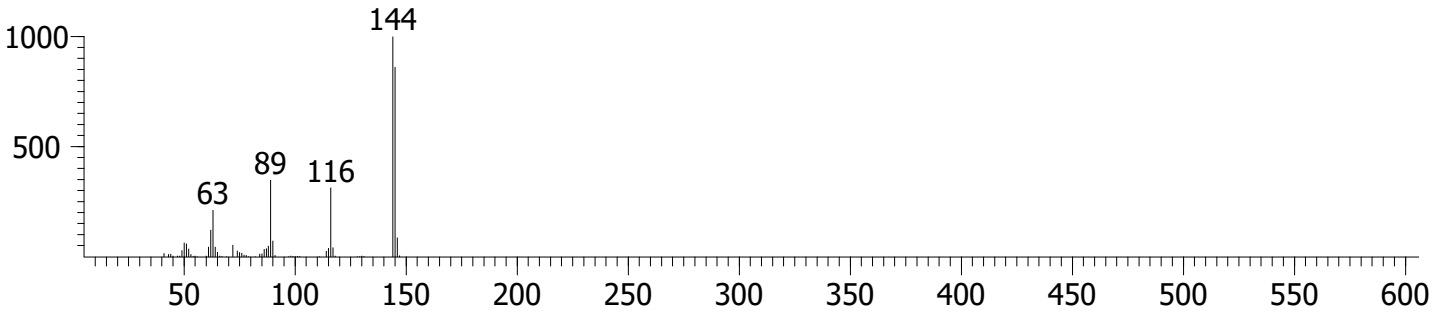

| Hit | Name                       | Similarity | Probability | CAS       | Library | Formula | Weight |
|-----|----------------------------|------------|-------------|-----------|---------|---------|--------|
| 1   | Indole-5-aldehyde          | 866        | 3757        | 1196-69-6 | mainlib | C9H7NO  | 145    |
| 2   | Indole-6-carboxaldehyde    | 854        | 2502        | 1196-70-9 | mainlib | C9H7NO  | 145    |
| 3   | 1H-Indole-3-carboxaldehyde | 851        | 2211        | 487-89-8  | mainlib | C9H7NO  | 145    |
| 4   | Indole-7-carboxaldehyde    | 823        | 638         | 1074-88-0 | mainlib | C9H7NO  | 145    |
| 5   | 1H-Indole-4-carboxaldehyde | 807        | 367         | 1074-86-8 | mainlib | C9H7NO  | 145    |

Cyclopenta[g]-2-benzopyran,  
3,4,6,7,8-hexahydro-4,6,6,7,8,8-hexamethyl

1st Dimension R.T. = 1658.83  
2nd Dimension R.T. = 1.789  
Quant Mass(es) = 243  
S/N = 297.47  
Area = 26691  
Height = 3199.3  
Similarity = 813

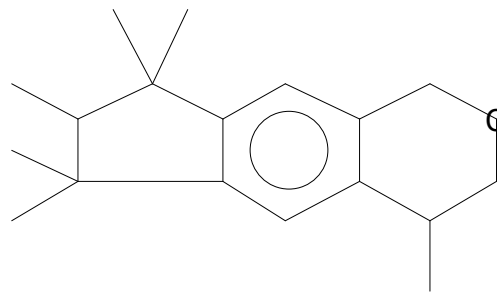

Peak Apex - sample "AerMBR A 092319 (20191119):1", peak 2500, at 1658.83 , 1.789 sec , sec (Spec # 1788 81)

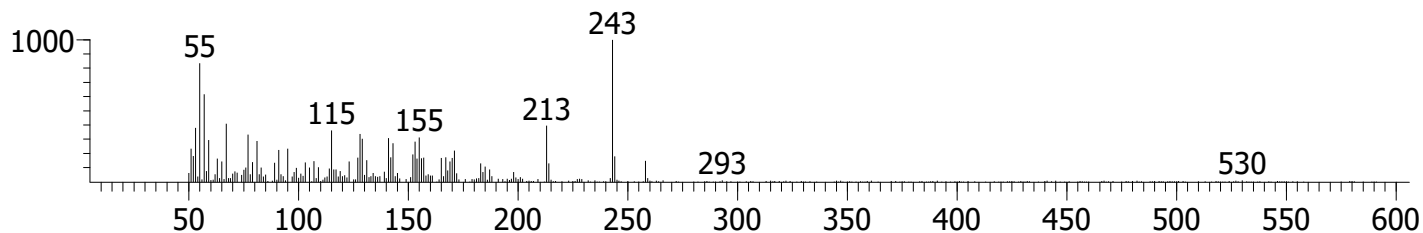

Peak True - sample "AerMBR A 092319 (20191119):1", peak 2500, at 1658.83 , 1.789 sec , sec (Spec # 1788 81)

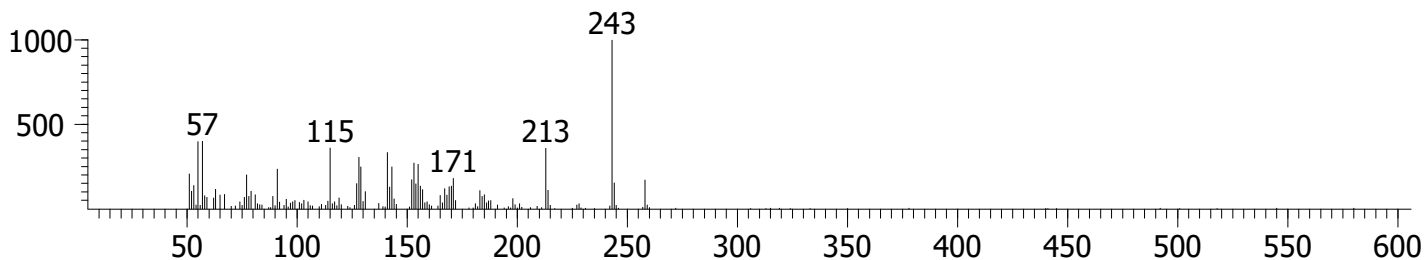

Library Hit - similarity 813, "Cyclopenta[g]-2-benzopyran, 1,3,4,6,7,8-hexahydro-4,6,6,7,8,8-hexamethyl-"

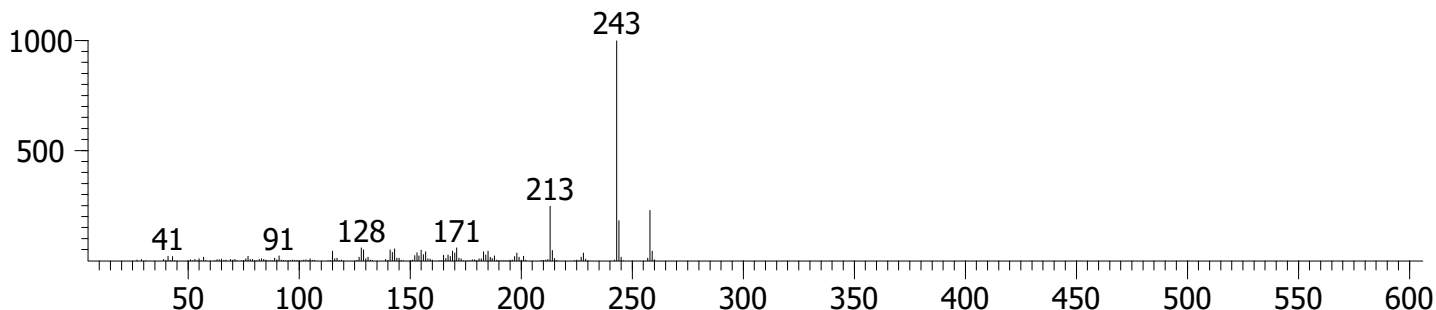

| Hit | Name                                                                                             | Similarity | Probability | CAS        | Library | Formula    | Weight |
|-----|--------------------------------------------------------------------------------------------------|------------|-------------|------------|---------|------------|--------|
| 1   | Cyclopenta[g]-2-benzopyran, 1,3,4,6,7,8-hexahydro-4,6,6,7,8,8-hexamethyl-                        | 813        | 8535        | 1222-05-5  | mainlib | C18H26O    | 258    |
| 2   | 1-Phenanthrenecarboxylic acid, 1,2,3,4,4a,9,10,10a-octahydro-1,4a-dimethyl-, [1S-(1à,4aà,10aà)]- | 694        | 460         | 57345-30-9 | mainlib | C17H22O2   | 258    |
| 3   | Pyrazole, 1,3-dimethyl-4-[2-(4-nitrophenyl)ethenyl]-                                             | 675        | 223         | 84547-52-4 | mainlib | C13H13N3O2 | 243    |
| 4   | 7-Acetyl-6-ethyl-1,1,4,4-tetramethyltetralin                                                     | 661        | 140         | 88-29-9    | mainlib | C18H26O    | 258    |
| 5   | 5,8,11-Heptadecatriynoic acid, methyl ester                                                      | 660        | 134         | 56554-57-5 | mainlib | C18H24O2   | 272    |

## Tonalid

1st Dimension R.T. = 1669.32  
 2nd Dimension R.T. = 1.742  
 Quant Mass(es) = 243  
 S/N = 195.33  
 Area = 15685  
 Height = 1833.3  
 Similarity = 756

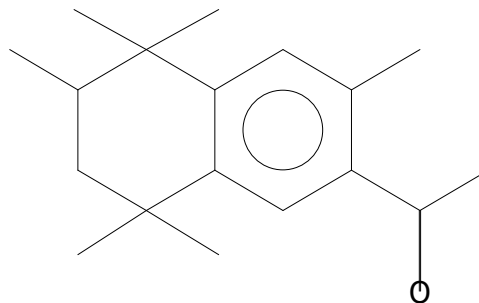

Peak Apex - sample "AerMBR A 092319 (20191119):1", peak 2521, at 1669.32 , 1.742 sec , sec (Spec # 1804 64)

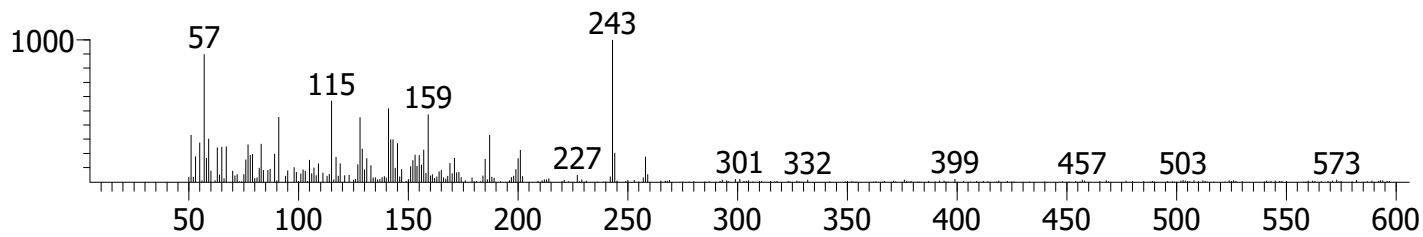

Peak True - sample "AerMBR A 092319 (20191119):1", peak 2521, at 1669.32 , 1.742 sec , sec (Spec # 1804 64)

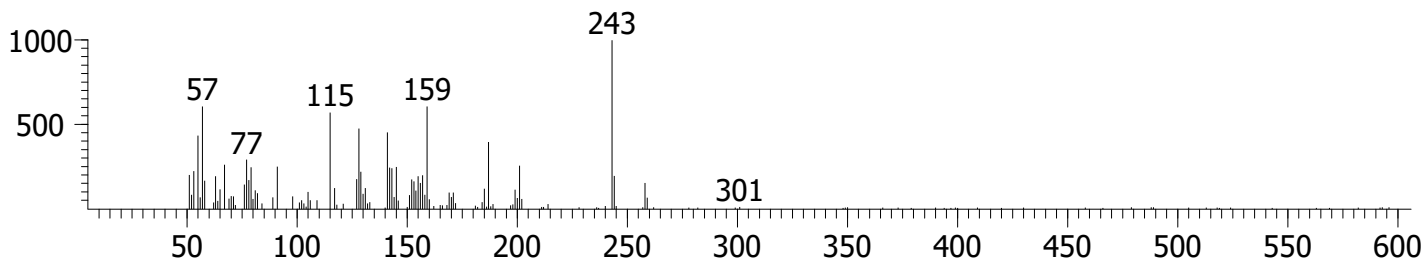

Library Hit - similarity 756, "Tonalid"

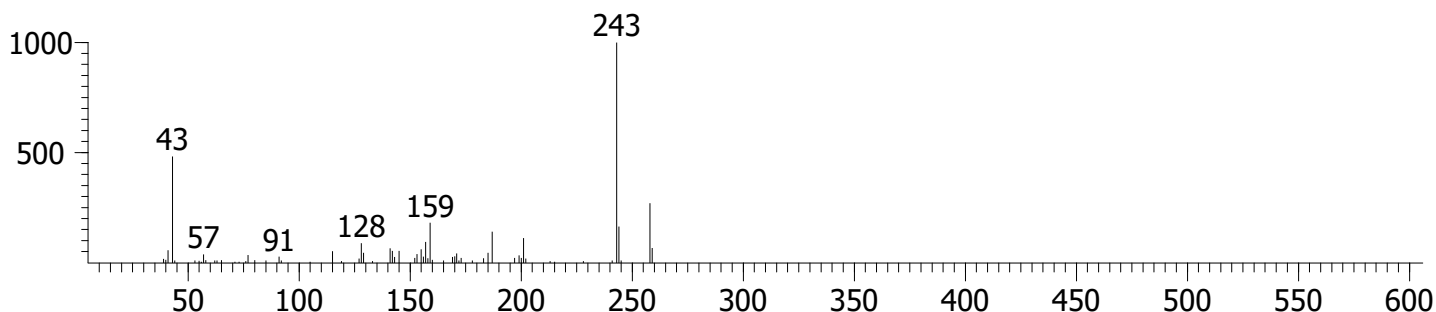

| Hit | Name                                                                      | Similarity | Probability | CAS         | Library | Formula  | Weight |
|-----|---------------------------------------------------------------------------|------------|-------------|-------------|---------|----------|--------|
| 1   | Tonalid                                                                   | 756        | 7086        | 21145-77-7  | mainlib | C18H26O  | 258    |
| 2   | 7-Acetyl-6-ethyl-1,1,4,4-tetramethyltetralin                              | 720        | 1751        | 88-29-9     | mainlib | C18H26O  | 258    |
| 3   | Cyclopenta[g]-2-benzopyran, 1,3,4,6,7,8-hexahydro-4,6,6,7,8,8-hexamethyl- | 667        | 346         | 1222-05-5   | mainlib | C18H26O  | 258    |
| 4   | 5,8,11-Eicosatriynoic acid, methyl ester                                  | 641        | 103         | 0-00-0      | mainlib | C21H30O2 | 314    |
| 5   | Furo[2,3-H]coumarine, 2-(1-hydroxyethyl)-1,6-dimethyl-                    | 635        | 81          | 350682-01-8 | mainlib | C15H14O4 | 258    |

## 2-Propenenitrile, 3,3-diphenyl-

1st Dimension R.T. = 1683.31  
2nd Dimension R.T. = 2.356  
Quant Mass(es) = 204  
S/N = 696.06  
Area = 69511  
Height = 6224.9  
Similarity = 892

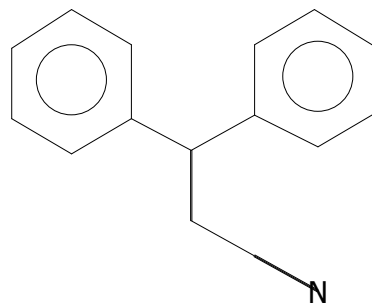

Peak Apex - sample "AerMBR A 092319 (20191119):1", peak 2547, at 1683.31 , 2.356 sec , sec (Spec # 1826 77)

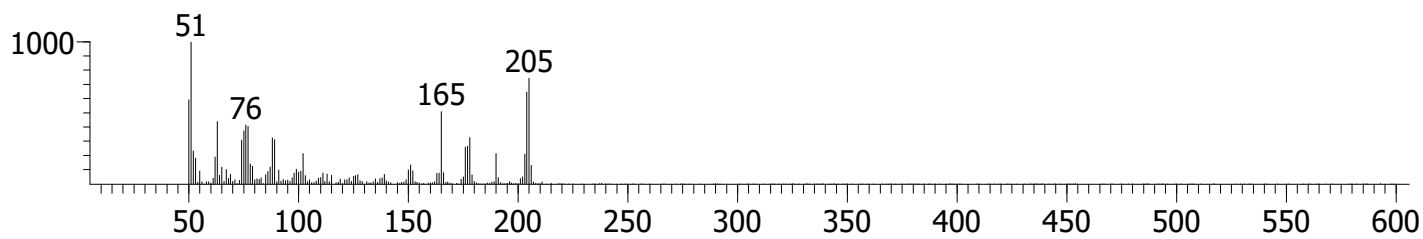

Peak True - sample "AerMBR A 092319 (20191119):1", peak 2547, at 1683.31 , 2.356 sec , sec (Spec # 1826 77)

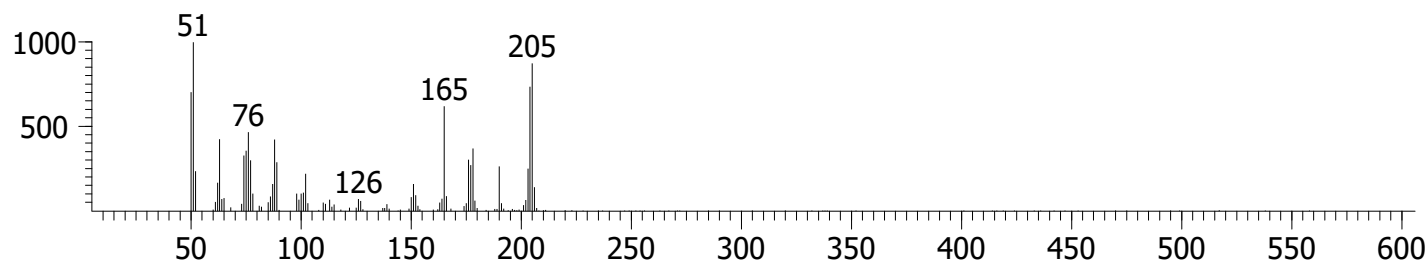

Library Hit - similarity 892, "2-Propenenitrile, 3,3-diphenyl-"

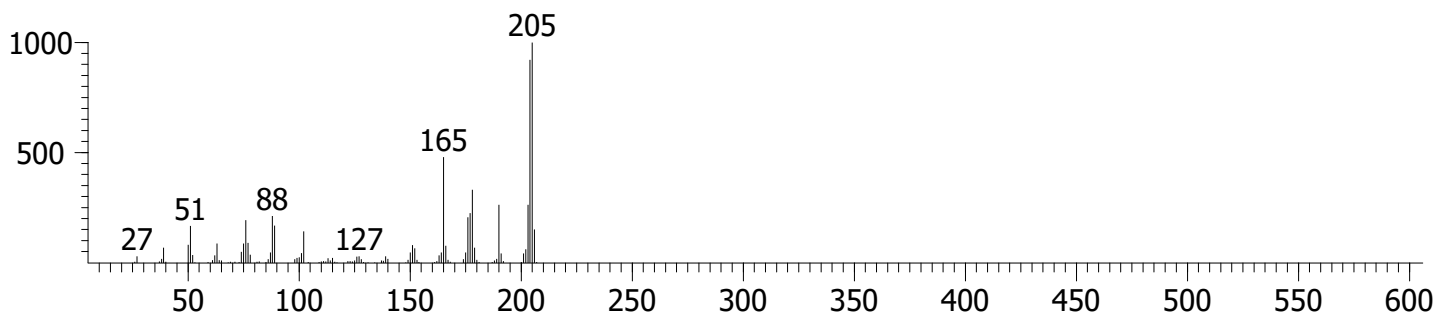

| Hit | Name                                                | Similarity | Probability | CAS        | Library | Formula | Weight |
|-----|-----------------------------------------------------|------------|-------------|------------|---------|---------|--------|
| 1   | 2-Propenenitrile, 3,3-diphenyl-                     | 892        | 7254        | 3531-24-6  | mainlib | C15H11N | 205    |
| 2   | Benzeneacetonitrile, à-(phenylmethylene)-           | 839        | 1435        | 2510-95-4  | mainlib | C15H11N | 205    |
| 3   | Benzonitrile, 4-(2-phenylethenyl)-                  | 809        | 398         | 1552-58-5  | mainlib | C15H11N | 205    |
| 4   | Benzene, 1,1'-(1-isocyano-1,2-ethenediyl)bis-, (Z)- | 802        | 305         | 56701-14-5 | mainlib | C15H11N | 205    |
| 5   | Benzonitrile, 3-(2-phenylethenyl)-, (E)-            | 791        | 209         | 14064-35-8 | mainlib | C15H11N | 205    |

# Benzene, (trimethoxymethyl)-

1st Dimension R.T. = 1690.31  
2nd Dimension R.T. = 2.251  
Quant Mass(es) = 151  
S/N = 414.03  
Area = 63480  
Height = 5464.1  
Similarity = 858

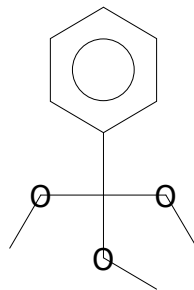

Peak Apex - sample "AerMBR A 092319 (20191119):1", peak 2565, at 1690.31 , 2.251 sec , sec (Spec # 1837 21)

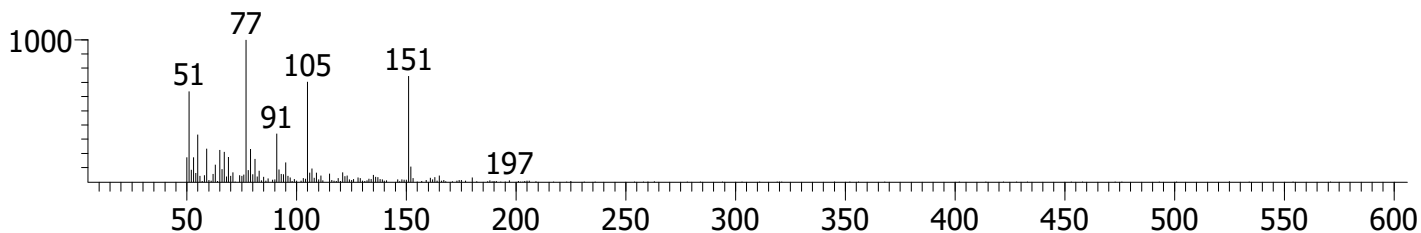

Peak True - sample "AerMBR A 092319 (20191119):1", peak 2565, at 1690.31 , 2.251 sec , sec (Spec # 1837 21)

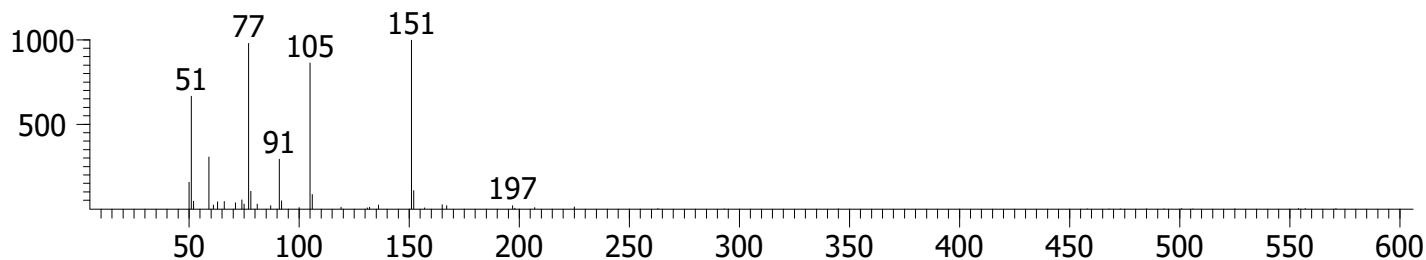

Library Hit - similarity 858, "Benzene, (trimethoxymethyl)-"

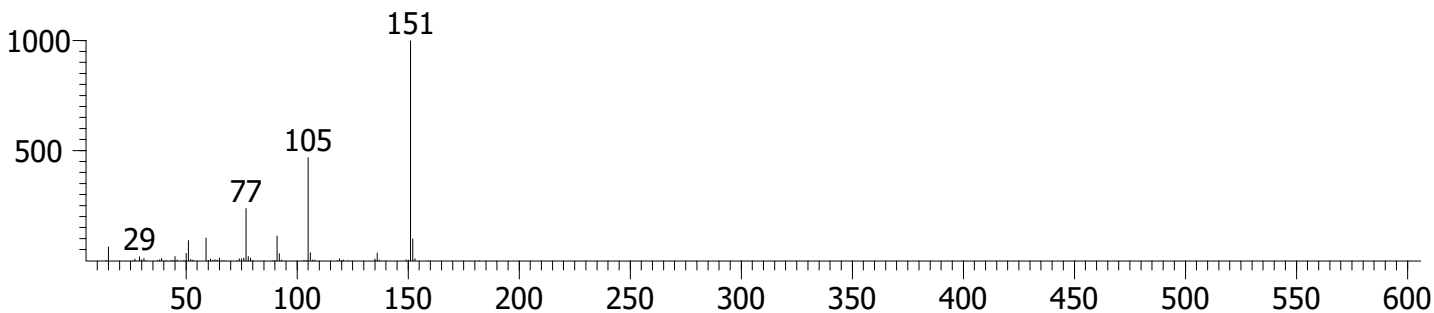

| Hit | Name                                        | Similarity | Probability | CAS        | Library | Formula    | Weight |
|-----|---------------------------------------------|------------|-------------|------------|---------|------------|--------|
| 1   | Benzene, (trimethoxymethyl)-                | 858        | 5568        | 707-07-3   | mainlib | C10H14O3   | 182    |
| 2   | Ethanone, 2,2-dimethoxy-1,2-diphenyl-       | 844        | 3485        | 24650-42-8 | mainlib | C16H16O3   | 256    |
| 3   | 5-Nitro-m-xylene                            | 744        | 259         | 99-12-7    | mainlib | C8H9NO2    | 151    |
| 4   | 2-Amino-1-(o-hydroxyphenyl)propane          | 734        | 183         | 73470-00-5 | mainlib | C9H13NO    | 151    |
| 5   | Benzoic acid, 1-cyanoquinuclidin-1-yl ester | 724        | 129         | 0-00-0     | mainlib | C15H16N2O2 | 256    |

Benzoic acid,  
3,5-bis(1,1-dimethylethyl)-4-hydroxy-

1st Dimension R.T. = 1697.3  
 2nd Dimension R.T. = 1.934  
 Quant Mass(es) = 235  
 S/N = 1703.0  
 Area = 260734  
 Height = 27941  
 Similarity = 888

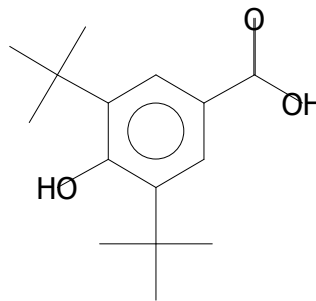

Peak Apex - sample "AerMBR A 092319 (20191119):1", peak 2577, at 1697.3 , 1.934 sec , sec (Spec # 18473 3)

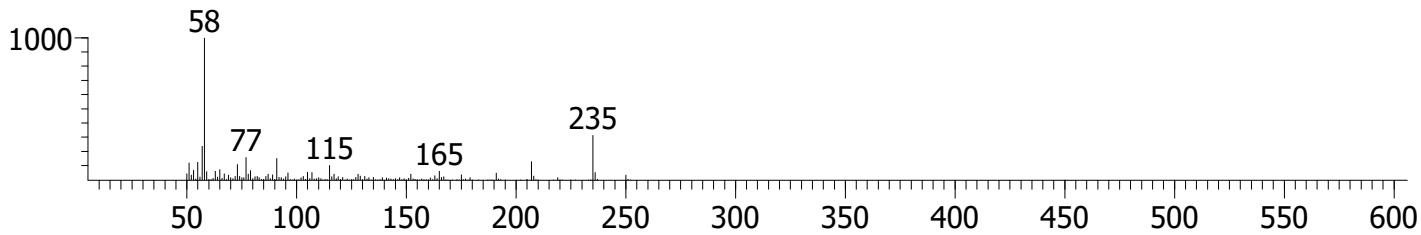

Peak True - sample "AerMBR A 092319 (20191119):1", peak 2577, at 1697.3 , 1.934 sec , sec (Spec # 18473 3)

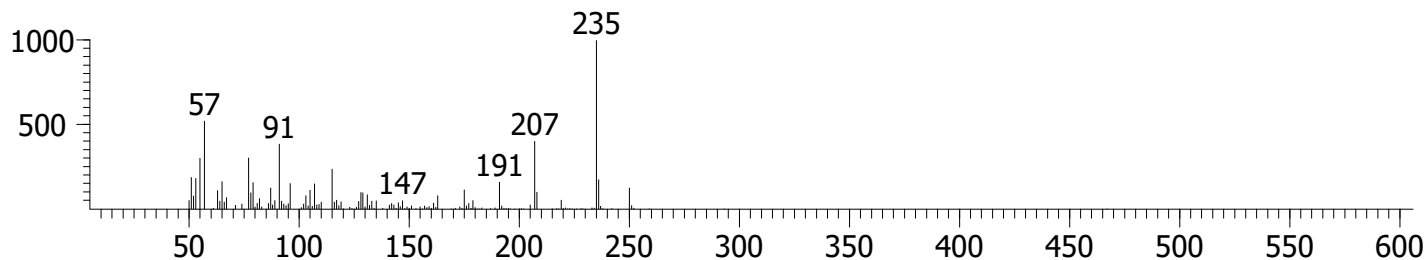

Library Hit - similarity 888, "Benzoic acid, 3,5-bis(1,1-dimethylethyl)-4-hydroxy-"

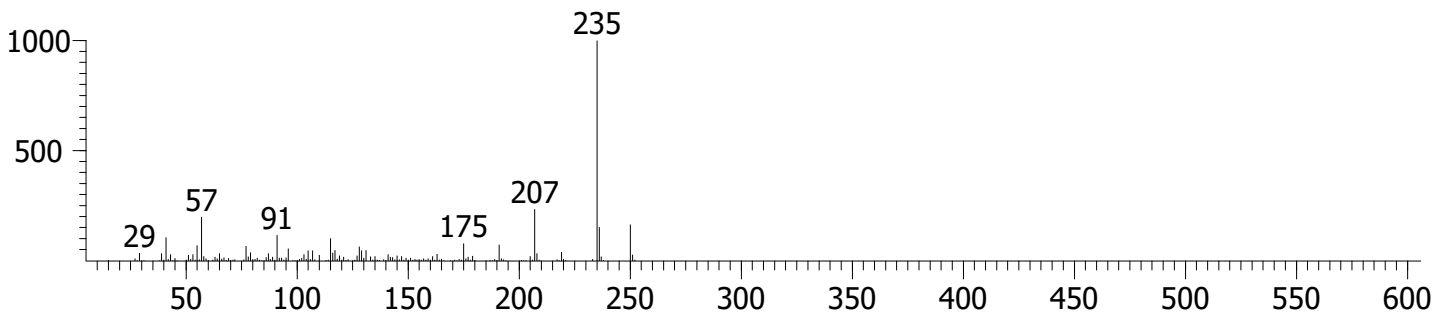

| Hit | Name                                                                             | Similarity | Probability | CAS        | Library | Formula   | Weight |
|-----|----------------------------------------------------------------------------------|------------|-------------|------------|---------|-----------|--------|
| 1   | Benzoic acid, 3,5-bis(1,1-dimethylethyl)-4-hydroxy-                              | 888        | 9664        | 1421-49-4  | mainlib | C15H22O3  | 250    |
| 2   | 1,3-Benzenedicarboxylic acid, 5-(1,1-dimethylethyl)-, dimethyl ester             | 678        | 96          | 16308-65-9 | mainlib | C14H18O4  | 250    |
| 3   | Phenol, 2,6-bis(1,1-dimethylethyl)-4-(methoxymethyl)-                            | 660        | 49          | 87-97-8    | mainlib | C16H26O2  | 250    |
| 4   | 2-tert-Butyl-4-ethylphenol, trimethylsilyl ether                                 | 659        | 47          | 0-00-0     | mainlib | C15H26OSi | 250    |
| 5   | 3-Cyclohexen-1-one, 2,2,4-trimethyl-3-[2-(2-methyl-1,3-dioxolan-2-yl)-1-ethenyl] | 644        | 29          | 0-00-0     | mainlib | C15H22O3  | 250    |



# Bayer 28,589

1st Dimension R.T. = 1711.3  
2nd Dimension R.T. = 1.802  
Quant Mass(es) = 236  
S/N = 112.42  
Area = 9032.0  
Height = 1101.2  
Similarity = 678

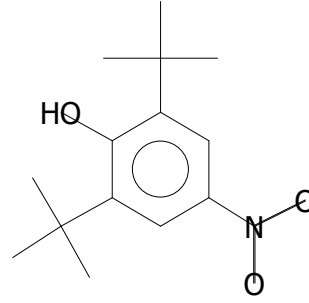

Peak Apex - sample "AerMBR A 092319 (20191119):1", peak 2596, at 1711.3 , 1.802 sec , sec (Spec # 18683 3)

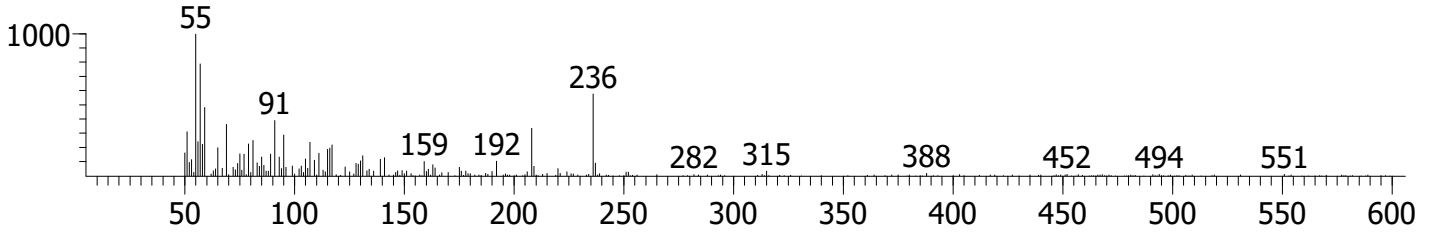

Peak True - sample "AerMBR A 092319 (20191119):1", peak 2596, at 1711.3 , 1.802 sec , sec (Spec # 18683 3)

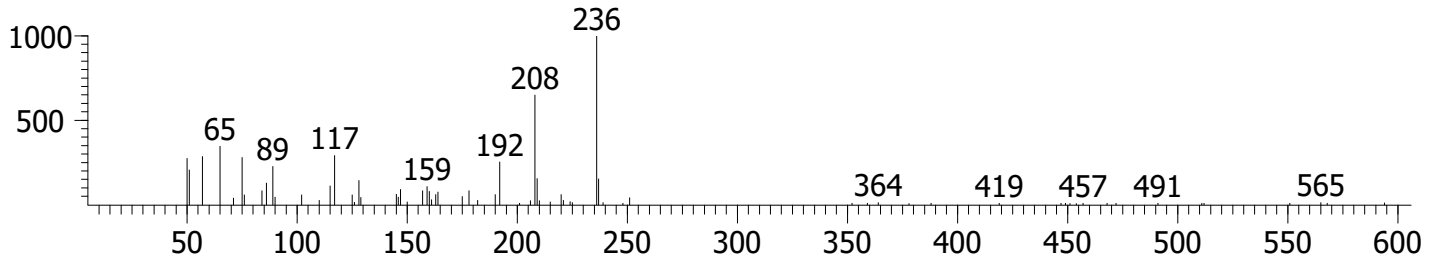

Library Hit - similarity 678, "Bayer 28,589"

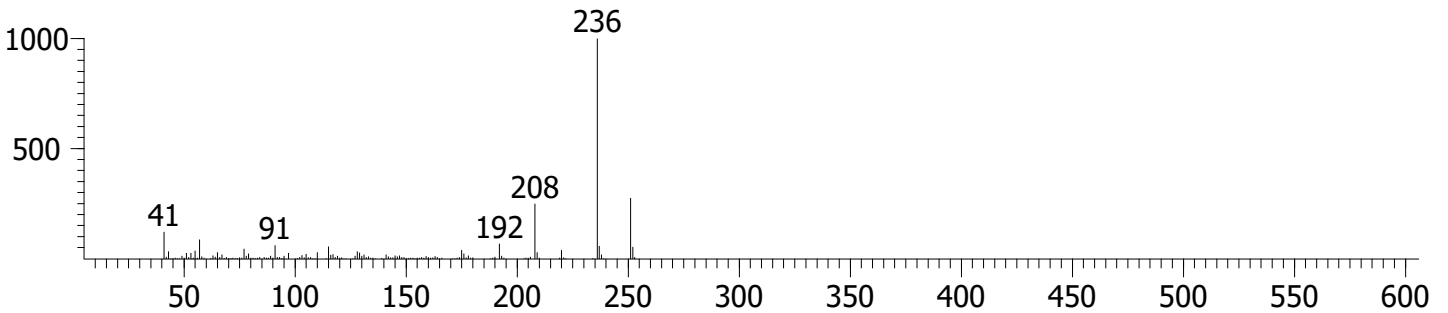

| Hit | Name                                      | Similarity | Probability | CAS        | Library | Formula     | Weight |
|-----|-------------------------------------------|------------|-------------|------------|---------|-------------|--------|
| 1   | Bayer 28,589                              | 678        | 5824        | 728-40-5   | mainlib | C14H21NO3   | 251    |
| 2   | 6H,12H-Indazolo[2,1-a]indazole-6,12-dione | 597        | 617         | 18428-89-2 | mainlib | C14H8N2O2   | 236    |
| 3   | 2-Tetrazaboroline, 5-methyl-1,4-diphenyl- | 597        | 617         | 20534-05-8 | mainlib | C13H13BN4   | 236    |
| 4   | 4-(3-Pyridyl)-4-oxo-butyrac acid tbdms    | 581        | 355         | 0-00-0     | mainlib | C15H23NO3Si | 293    |
| 5   | Dendroban-12-one, 10-hydroxy-             | 576        | 286         | 29414-86-6 | mainlib | C16H25NO3   | 279    |

# -tert-butyl-1-oxaspiro(4,5)deca-6,9-diene-2,8

1st Dimension R.T. = 1718.29  
2nd Dimension R.T. = 1.855  
Quant Mass(es) = 205  
S/N = 2606.4  
Area = 234238  
Height = 27302  
Similarity = 871

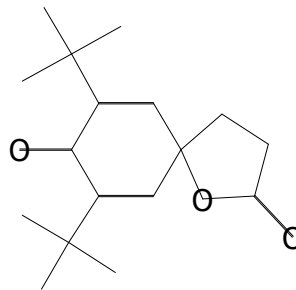

Peak Apex - sample "AerMBR A 092319 (20191119):1", peak 2608, at 1718.29 , 1.855 sec , sec (Spec # 1879 01)

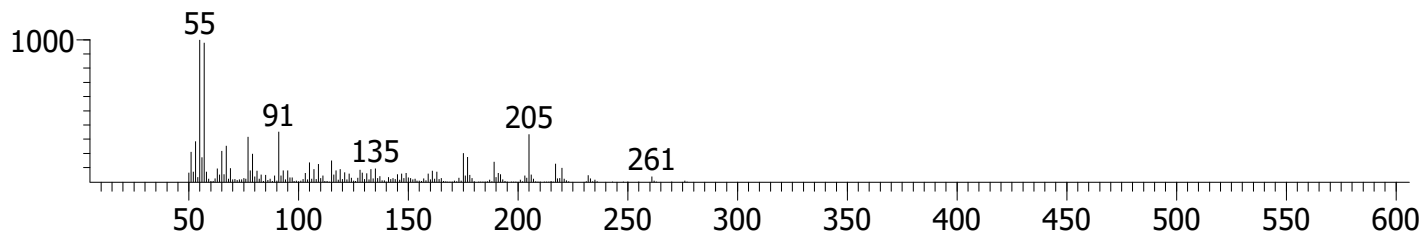

Peak True - sample "AerMBR A 092319 (20191119):1", peak 2608, at 1718.29 , 1.855 sec , sec (Spec # 1879 01)

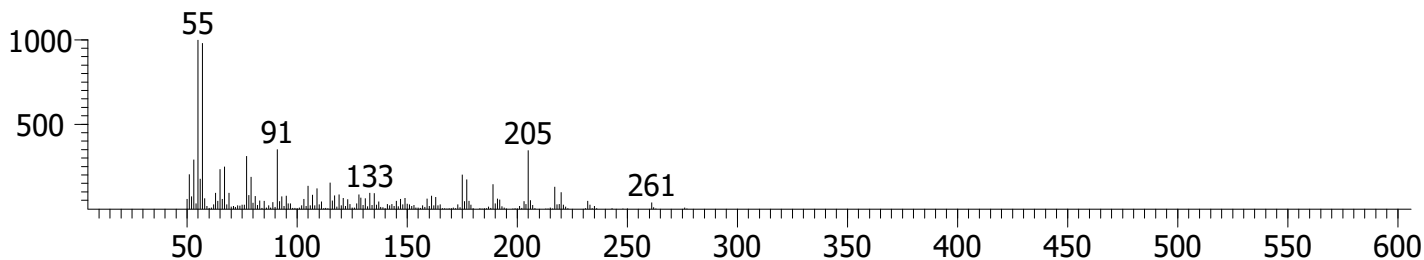

Library Hit - similarity 871, "7,9-Di-tert-butyl-1-oxaspiro(4,5)deca-6,9-diene-2,8-dione"

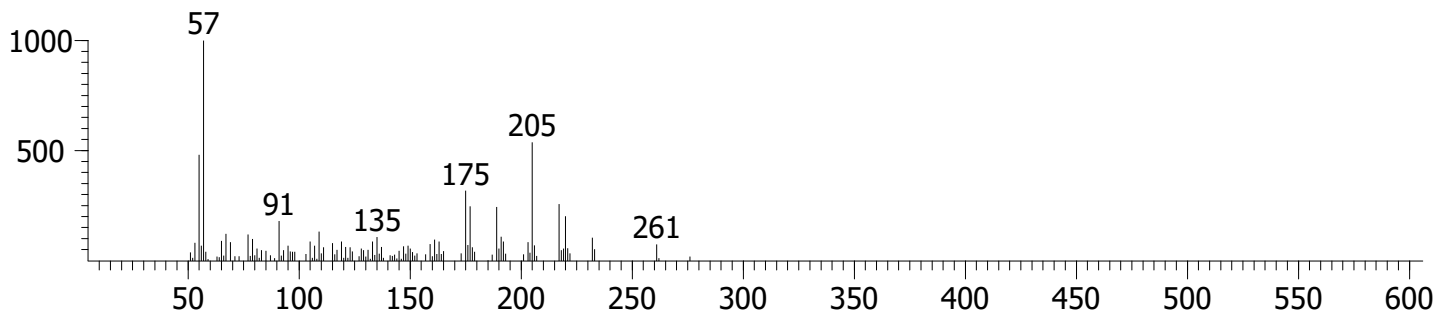

| Hit | Name                                                                                                                                                                                          | Similarity | Probability | CAS        | Library | Formula  | Weight |
|-----|-----------------------------------------------------------------------------------------------------------------------------------------------------------------------------------------------|------------|-------------|------------|---------|----------|--------|
| 1   | 7,9-Di-tert-butyl-1-oxaspiro(4,5)deca-6,9-diene-2,8-dione                                                                                                                                     | 871        | 8696        | 82304-66-3 | mainlib | C17H24O3 | 276    |
| 2   | Trichothec-9-en-8-one, 12,13-epoxy-3,4,7,15-tetrahydroxy-, (3à,4á,7à)-                                                                                                                        | 718        | 233         | 23282-20-4 | mainlib | C15H20O7 | 312    |
| 3   | 9-Isopropyl-1-methyl-2-methylene-5-oxatricyclo[5.4.0.0(3,8)]undecane                                                                                                                          | 704        | 145         | 0-00-0     | mainlib | C15H24O  | 220    |
| 4   | 11,14-Octadecadiynoic acid, methyl ester                                                                                                                                                      | 699        | 117         | 56554-58-6 | mainlib | C19H30O2 | 290    |
| 5   | 1H-2,8a-Methanocyclopenta[a]cyclopropa[e]cyclodecen-11-one, 1a,2,5,5a,6,9,10,10a-octahydro-5,5a,6-trihydroxy-1,4-bis(hydroxymethyl)-1,7,9-trimethyl-, [1S-(1à,1aà,2à,5á,5aá,6á,8aà,9à,10aà)]- | 694        | 94          | 52557-29-6 | mainlib | C20H28O6 | 364    |

Acetamide,  
N-[4-hydroxy-3-(methylthio)phenyl]-

1st Dimension R.T. = 1721.79  
2nd Dimension R.T. = 2.620  
Quant Mass(es) = 140  
S/N = 218.97  
Area = 46926  
Height = 4017.7  
Similarity = 773

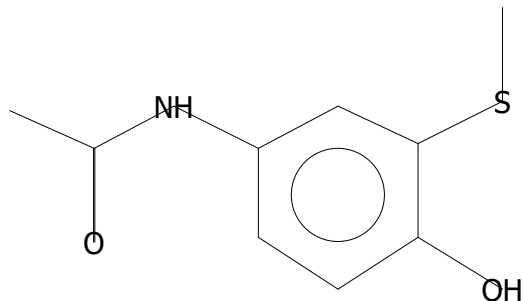

Peak Apex - sample "AerMBR A 092319 (20191119):1", peak 2622, at 1721.79 , 2.620 sec , sec (Spec # 1885 47)

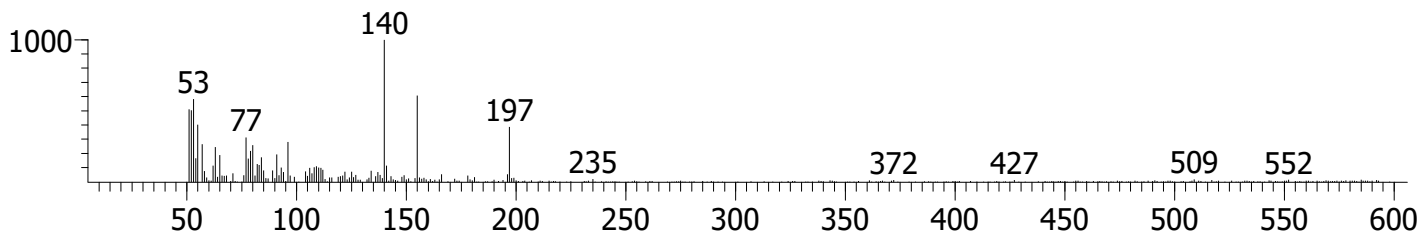

Peak True - sample "AerMBR A 092319 (20191119):1", peak 2622, at 1721.79 , 2.620 sec , sec (Spec # 1885 47)

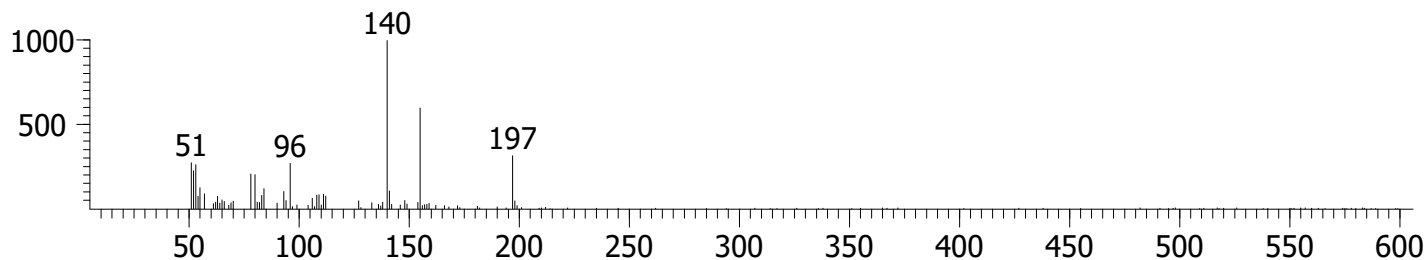

Library Hit - similarity 773, "Acetamide, N-[4-hydroxy-3-(methylthio)phenyl]-"

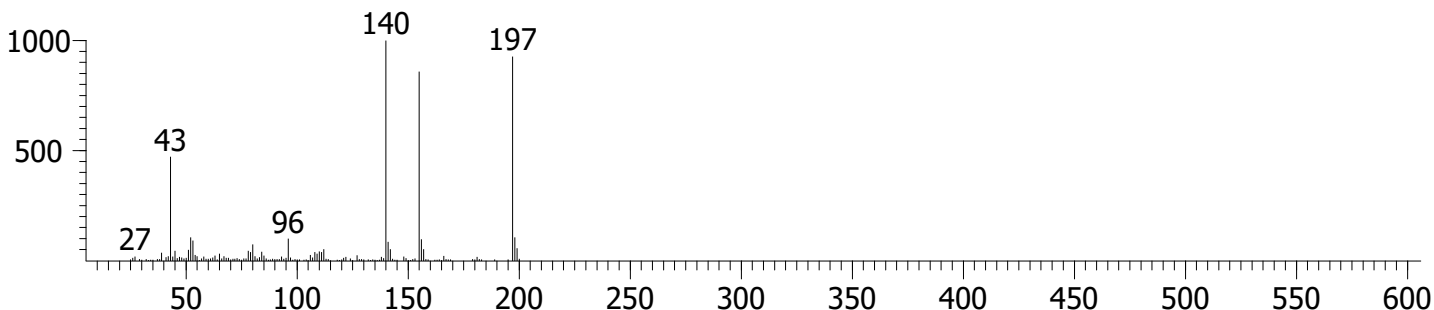

| Hit | Name                                                                              | Similarity | Probability | CAS         | Library | Formula    | Weight |
|-----|-----------------------------------------------------------------------------------|------------|-------------|-------------|---------|------------|--------|
| 1   | Acetamide, N-[4-hydroxy-3-(methylthio)phenyl]-                                    | 773        | 9171        | 37398-23-5  | mainlib | C9H11NO2S  | 197    |
| 2   | Pent-1-en-3-one, 4,4-dimethyl-1-(4-morpholino)-                                   | 615        | 232         | 0-00-0      | mainlib | C11H19NO2  | 197    |
| 3   | 5-Ethyl-6-imino-5-(1-methyl-butyl)-dihydro-pyrimidine-2,4-dione                   | 582        | 60          | 0-00-0      | mainlib | C11H19N3O2 | 225    |
| 4   | 3-Butanone, 2-(2,6-dioxo-3-piperidyl)-2-methyl-                                   | 569        | 39          | 198283-36-2 | mainlib | C10H15NO3  | 197    |
| 5   | 5a-Methoxy-9a-methyl-3,4,5a,6,7,8,9a,10-octahydropyrano [4,3-b]chromene-1,9-dione | 567        | 36          | 0-00-0      | mainlib | C14H18O5   | 266    |

Benzenepropanoic acid,  
3,5-bis(1,1-dimethylethyl)-4-hydroxy-,

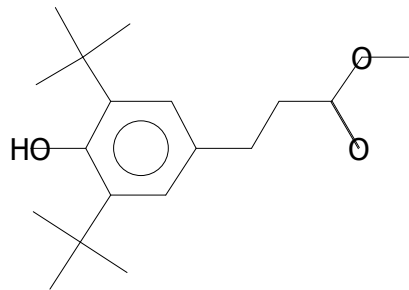

1st Dimension R.T. = 1735.78  
 2nd Dimension R.T. = 1.775  
 Quant Mass(es) = 277  
 S/N = 1306.9  
 Area = 70121  
 Height = 7786.1  
 Similarity = 816

Peak Apex - sample "AerMBR A 092319 (20191119):1", peak 2647, at 1735.78 , 1.775 sec , sec (Spec # 1905 39)

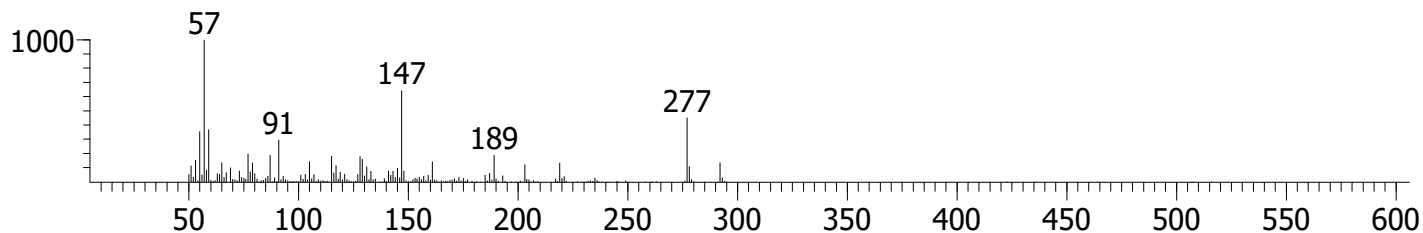

Peak True - sample "AerMBR A 092319 (20191119):1", peak 2647, at 1735.78 , 1.775 sec , sec (Spec # 1905 39)

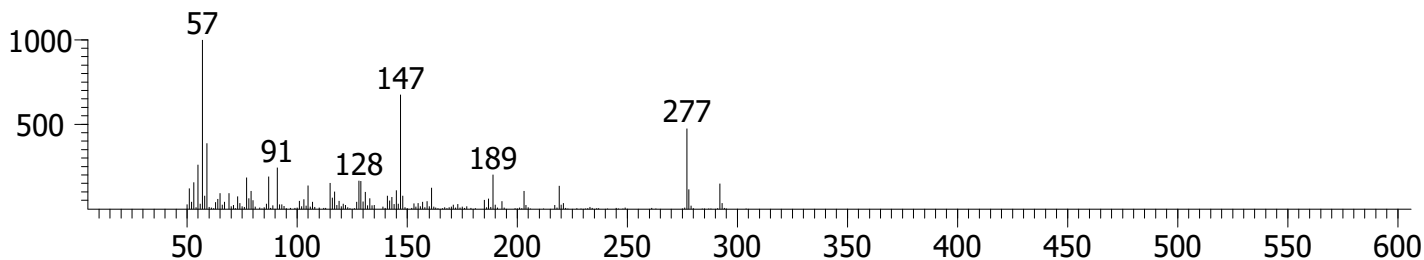

Library Hit - similarity 816, "Benzenepropanoic acid, 3,5-bis(1,1-dimethylethyl)-4-hydroxy-, methyl ester"

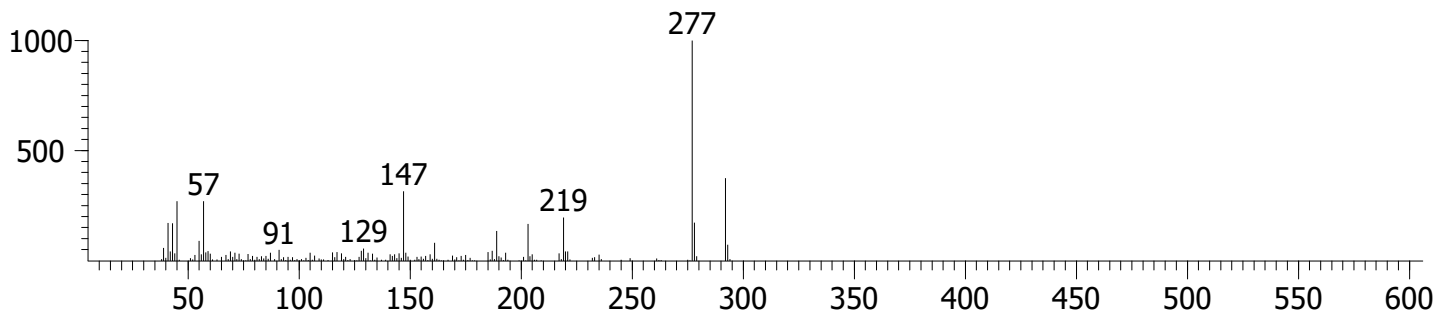

| Hit | Name                                                                       | Similarity | Probability | CAS        | Library | Formula     | Weight |
|-----|----------------------------------------------------------------------------|------------|-------------|------------|---------|-------------|--------|
| 1   | Benzenepropanoic acid, 3,5-bis(1,1-dimethylethyl)-4-hydroxy-, methyl ester | 816        | 9562        | 6386-38-5  | mainlib | C18H28O3    | 292    |
| 2   | Butylated Hydroxytoluene, TMS derivative                                   | 629        | 149         | 18510-49-1 | mainlib | C18H32OSi   | 292    |
| 3   | Propanamide, 3-[3,5-di(tert-butyl)-4-hydroxyphenyl]-N-(2-hydroxyethyl)-    | 591        | 35          | 0-00-0     | mainlib | C19H31NO3   | 321    |
| 4   | 9-Heptadecene-4,6-diyne-8-ol, (Z)-                                         | 583        | 26          | 32768-90-4 | mainlib | C17H26O     | 246    |
| 5   | 2,6-Dimethyl-N-[3-(trimethylsilyl)-1,3-thiazinan-2-ylidene]aniline         | 573        | 18          | 0-00-0     | mainlib | C15H24N2SSi | 292    |

# Propanediamide, 2-ethyl-2-phenyl-

1st Dimension R.T. = 1739.28  
2nd Dimension R.T. = 2.818  
Quant Mass(es) = 148  
S/N = 370.85  
Area = 67046  
Height = 5535.6  
Similarity = 823

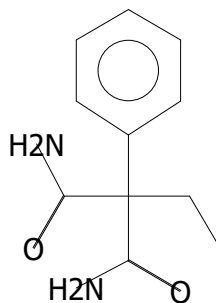

Peak Apex - sample "AerMBR A 092319 (20191119):1", peak 2660, at 1739.28 , 2.818 sec , sec (Spec # 1912 27)

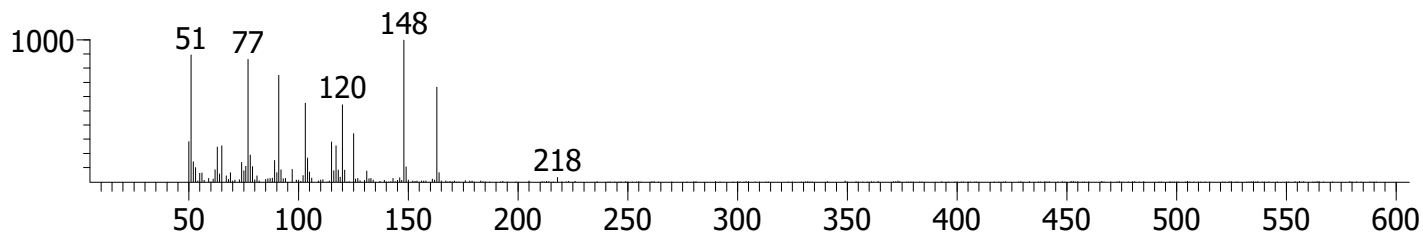

Peak True - sample "AerMBR A 092319 (20191119):1", peak 2660, at 1739.28 , 2.818 sec , sec (Spec # 1912 27)

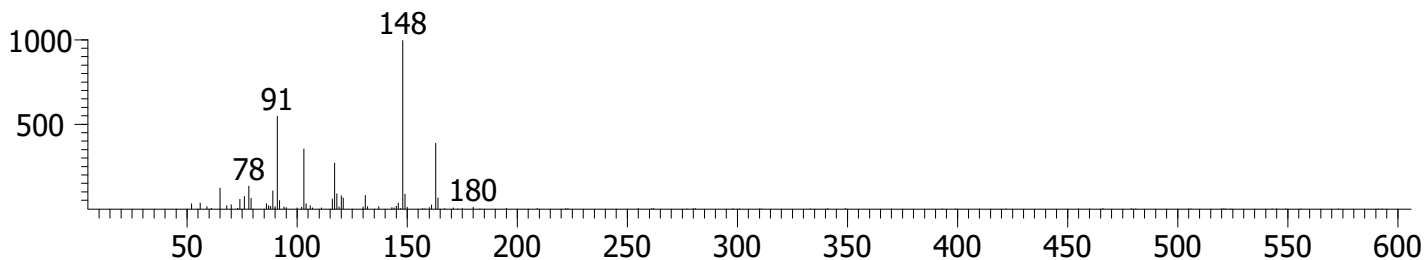

Library Hit - similarity 823, "Propanediamide, 2-ethyl-2-phenyl-"

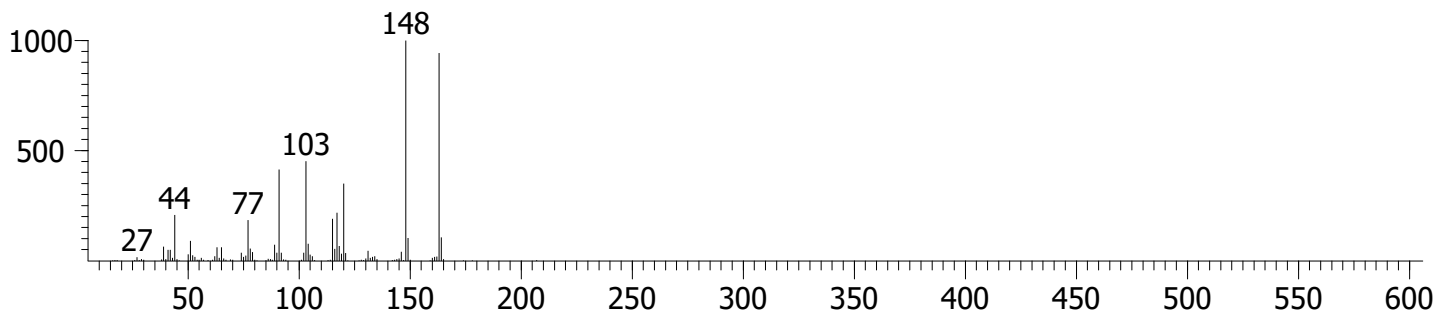

| Hit | Name                               | Similarity | Probability | CAS         | Library | Formula    | Weight |
|-----|------------------------------------|------------|-------------|-------------|---------|------------|--------|
| 1   | Propanediamide, 2-ethyl-2-phenyl-  | 823        | 7690        | 7206-76-0   | mainlib | C11H14N2O2 | 206    |
| 2   | Benzene, 1-acetyl-2-amino-3-ethyl- | 717        | 516         | 108562-67-0 | mainlib | C10H13NO   | 163    |
| 3   | Benzenamine, N,N-diethyl-2-methyl- | 705        | 344         | 606-46-2    | mainlib | C11H17N    | 163    |
| 4   | 2-tert-Butyl-6-methylaniline       | 705        | 344         | 13117-94-7  | mainlib | C11H17N    | 163    |
| 5   | Benzenamine, N,N-diethyl-4-methyl- | 695        | 242         | 613-48-9    | mainlib | C11H17N    | 163    |

1H-Indene-4-acetic acid,  
-(1,1-dimethylethyl)-2,3-dihydro-1,1-dimethyl

1st Dimension R.T. = 1742.78  
 2nd Dimension R.T. = 1.940  
 Quant Mass(es) = 245  
 S/N = 900.27  
 Area = 52502  
 Height = 5213.6  
 Similarity = 679

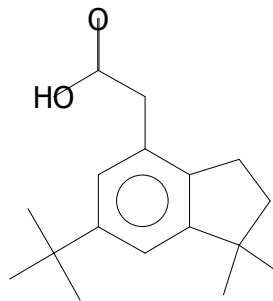

Peak Apex - sample "AerMBR A 092319 (20191119):1", peak 2664, at 1742.78 , 1.940 sec , sec (Spec # 1916 24)

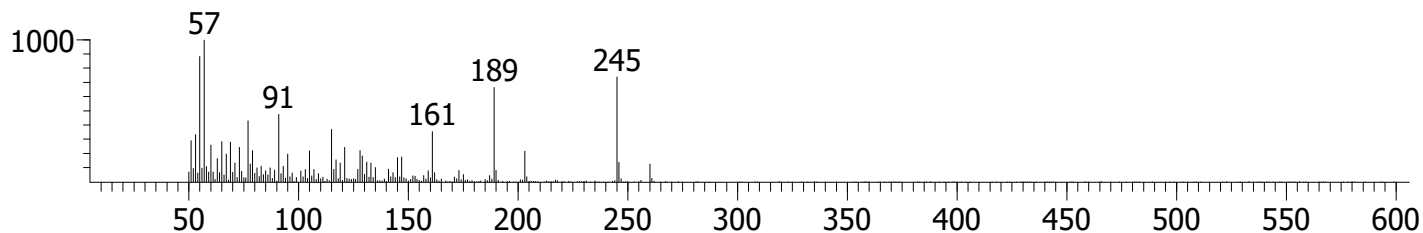

Peak True - sample "AerMBR A 092319 (20191119):1", peak 2664, at 1742.78 , 1.940 sec , sec (Spec # 1916 24)

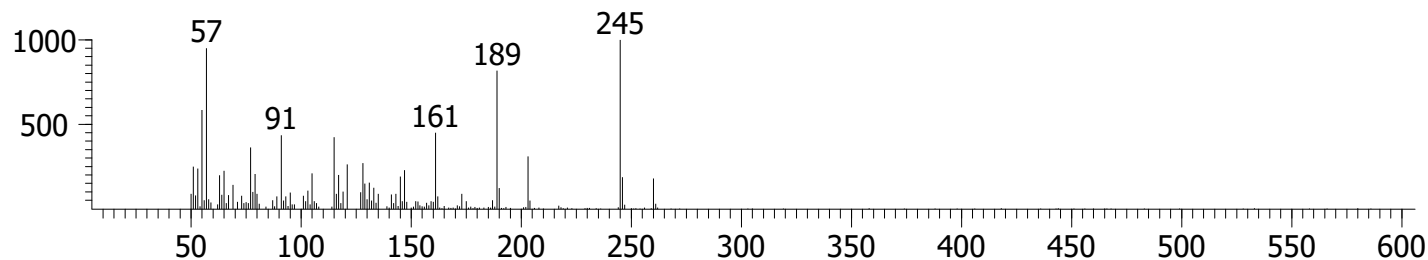

Library Hit - similarity 679, "1H-Indene-4-acetic acid, 6-(1,1-dimethylethyl)-2,3-dihydro-1,1-dimethyl-"

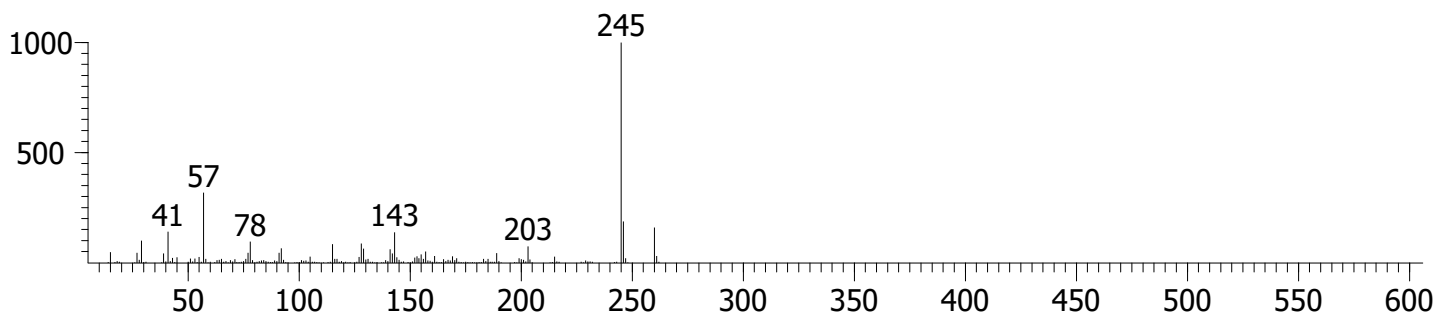

| Hit | Name                                                                         | Similarity | Probability | CAS        | Library | Formula  | Weight |
|-----|------------------------------------------------------------------------------|------------|-------------|------------|---------|----------|--------|
| 1   | 1H-Indene-4-acetic acid, 6-(1,1-dimethylethyl)-2,3-dihydro-1,1-dimethyl-     | 679        | 3492        | 55591-05-4 | mainlib | C17H24O2 | 260    |
| 2   | Acetate, (2-cyclohexenyl-3-[1-methyl-3-oxo-1-butenyl]-2,4,4-trimethyl) ester | 637        | 783         | 0-00-0     | mainlib | C16H24O3 | 264    |
| 3   | Bis[3-(3,5-di-tert-butyl-4-hydroxyphenyl)propyl] maleate                     | 621        | 451         | 0-00-0     | mainlib | C38H56O6 | 608    |
| 4   | 9-Heptadecene-4,6-diy-8-ol, (Z)-                                             | 606        | 273         | 32768-90-4 | mainlib | C17H26O  | 246    |
| 5   | Naphthalene, 2,3,4,4a,5,6-hexahydro-1,4a-dimethyl-7-(1-methylethyl)-         | 604        | 252         | 473-14-3   | mainlib | C15H24   | 204    |

# Benzoic acid, 2-benzoyl-, methyl ester

1st Dimension R.T. = 1746.28  
2nd Dimension R.T. = 2.521  
Quant Mass(es) = 163  
S/N = 1119.8  
Area = 173443  
Height = 14318  
Similarity = 825

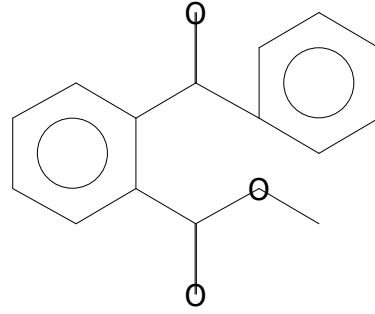

Peak Apex - sample "AerMBR A 092319 (20191119):1", peak 2673, at 1746.28 , 2.521 sec , sec (Spec # 1922 42)

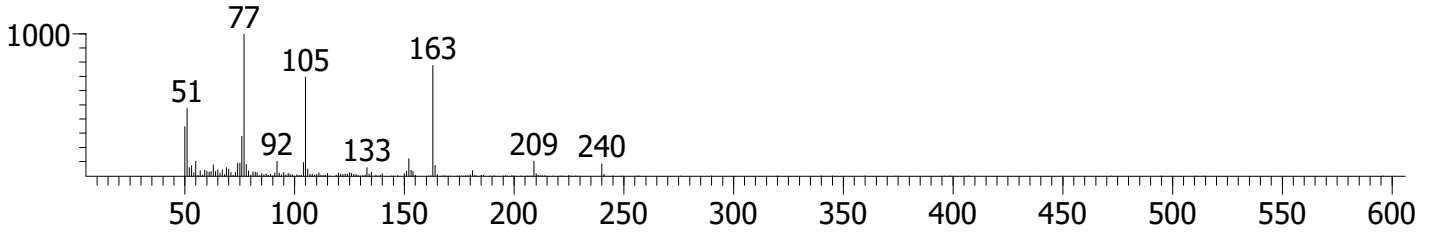

Peak True - sample "AerMBR A 092319 (20191119):1", peak 2673, at 1746.28 , 2.521 sec , sec (Spec # 1922 42)

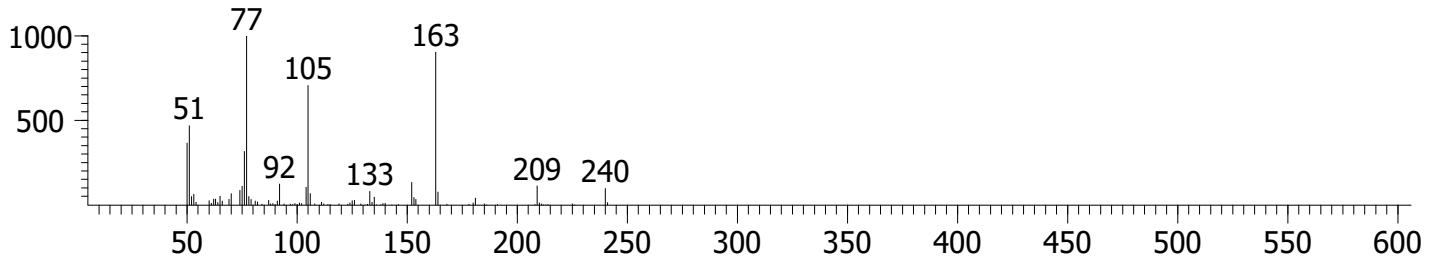

Library Hit - similarity 825, "Benzoic acid, 2-benzoyl-, methyl ester"

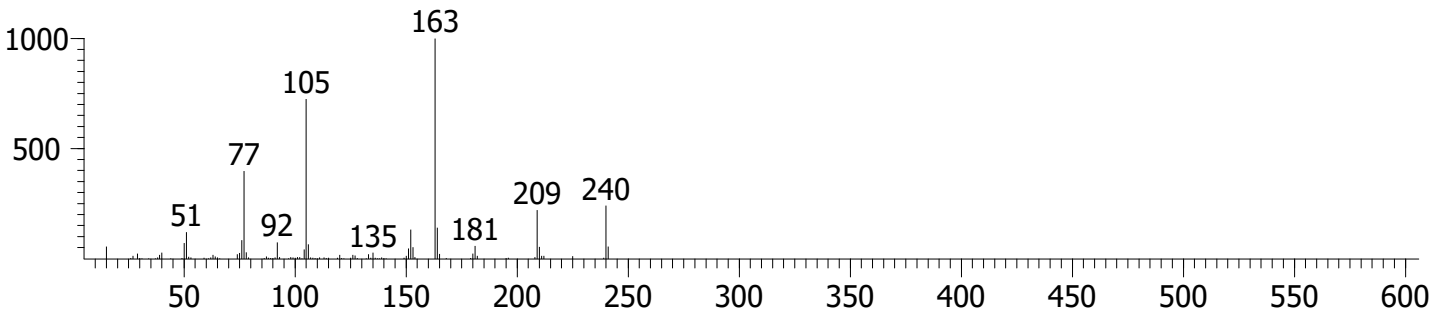

| Hit | Name                                         | Similarity | Probability | CAS        | Library | Formula  | Weight |
|-----|----------------------------------------------|------------|-------------|------------|---------|----------|--------|
| 1   | Benzoic acid, 2-benzoyl-, methyl ester       | 825        | 8290        | 606-28-0   | mainlib | C15H12O3 | 240    |
| 2   | Benzoic acid, 2-(1-oxopropyl)-, methyl ester | 730        | 671         | 32025-37-9 | mainlib | C11H12O3 | 192    |
| 3   | Benzoic acid, 4-benzoyl-, methyl ester       | 723        | 514         | 6158-54-9  | mainlib | C15H12O3 | 240    |
| 4   | 1,3-Dioxolane, 2,4-dimethyl-2-phenyl-        | 689        | 131         | 4359-30-2  | mainlib | C11H14O2 | 178    |
| 5   | Ethanone, 2-(2-methylpropoxy)-1,2-diphenyl-  | 676        | 85          | 22499-12-3 | mainlib | C18H20O2 | 268    |

## 2,4(1H,3H)-Pteridinedione, 1,3-dimethyl-

1st Dimension R.T. = 1760.27

2nd Dimension R.T. = 2.792

Quant Mass(es) = 85

S/N = 589.46

Area = 2395.9

Height = 502.47

Similarity = 743

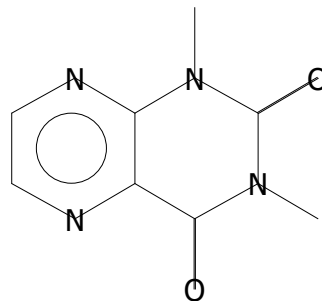

Peak Apex - sample "AerMBR A 092319 (20191119):1", peak 2702, at 1760.27 , 2.792 sec , sec (Spec # 1944 03)

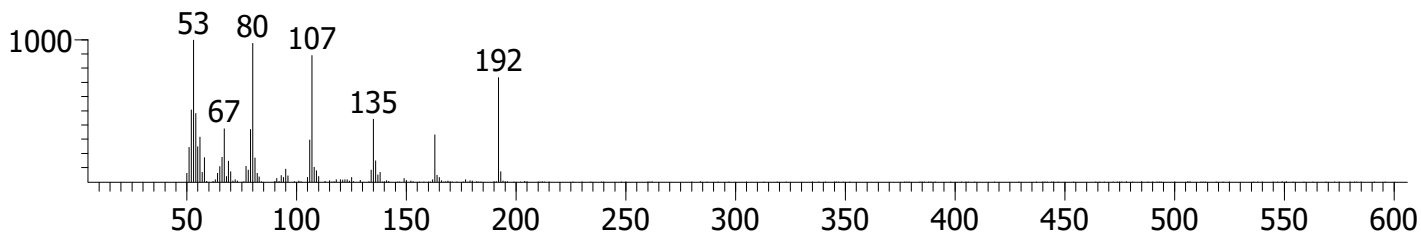

Peak True - sample "AerMBR A 092319 (20191119):1", peak 2702, at 1760.27 , 2.792 sec , sec (Spec # 1944 03)

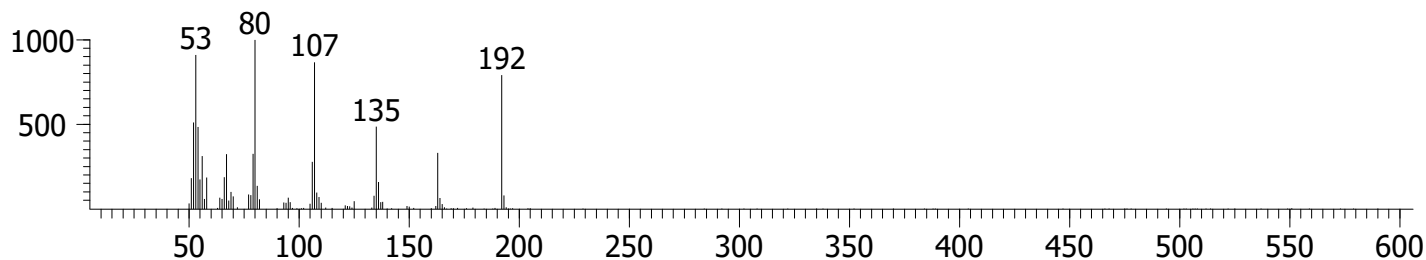

Library Hit - similarity 743, "2,4(1H,3H)-Pteridinedione, 1,3-dimethyl-"

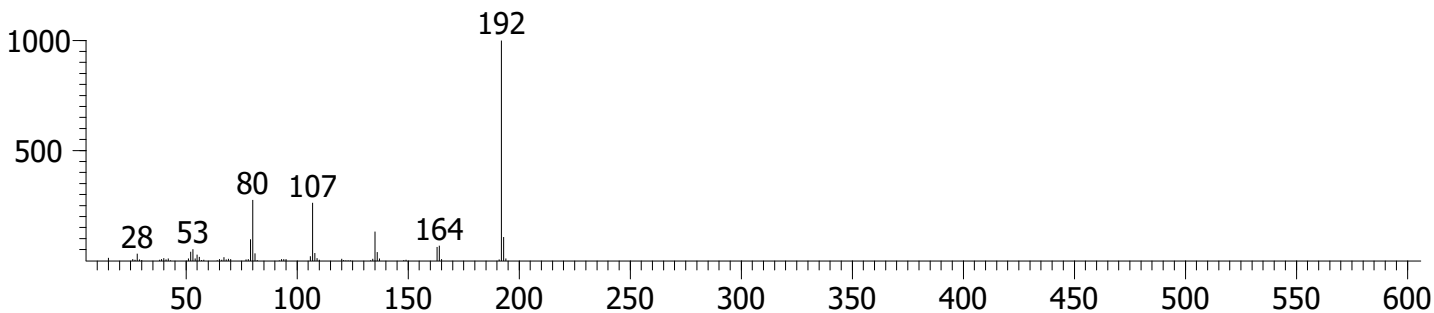

| Hit | Name                                                               | Similarity | Probability | CAS        | Library | Formula  | Weight |
|-----|--------------------------------------------------------------------|------------|-------------|------------|---------|----------|--------|
| 1   | 2,4(1H,3H)-Pteridinedione, 1,3-dimethyl-                           | 743        | 6964        | 13401-18-8 | mainlib | C8H8N4O2 | 192    |
| 2   | 4(3H)-Pteridinone, 3-methoxy-6-methyl-                             | 681        | 1190        | 24898-65-5 | mainlib | C8H8N4O2 | 192    |
| 3   | 4(3H)-Pteridinone, 3-hydroxy-6,7-dimethyl-                         | 638        | 262         | 18106-61-1 | mainlib | C8H8N4O2 | 192    |
| 4   | 6-Methoxy-2,4-dihydroxy-1,5-naphthyridine                          | 633        | 211         | 0-00-0     | mainlib | C9H8N2O3 | 192    |
| 5   | 5-Amino-1-(4-amino-furazan-3-yl)-1H-[1,2,3]triazole-4-carbonitrile | 618        | 128         | 0-00-0     | mainlib | C5H4N8O  | 192    |



### 3,5-di-tert-Butyl-4-hydroxyphenylpropionic acid

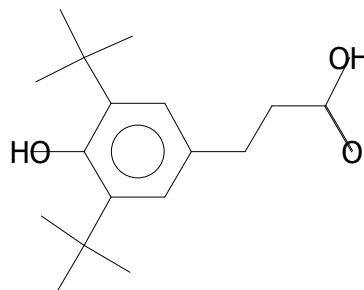

1st Dimension R.T. = 1784.75

2nd Dimension R.T. = 1.881

Quant Mass(es) = 263

S/N = 2991.9

Area = 397001

Height = 41175

Similarity = 798

Peak Apex - sample "AerMBR A 092319 (20191119):1", peak 2741, at 1784.75 , 1.881 sec , sec (Spec # 1979 75)

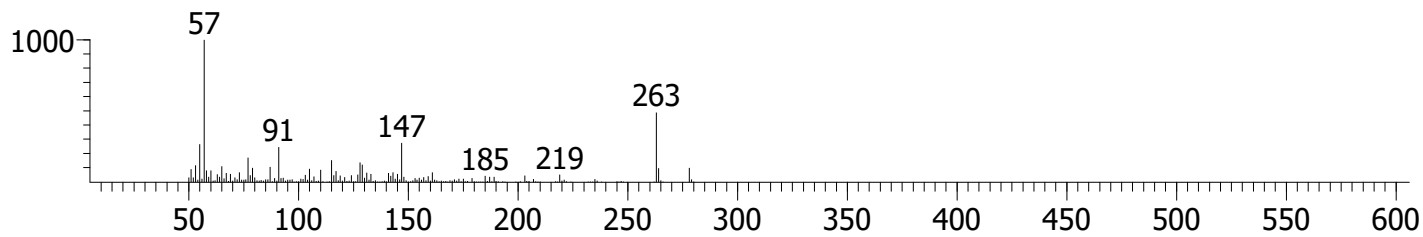

Peak True - sample "AerMBR A 092319 (20191119):1", peak 2741, at 1784.75 , 1.881 sec , sec (Spec # 1979 75)

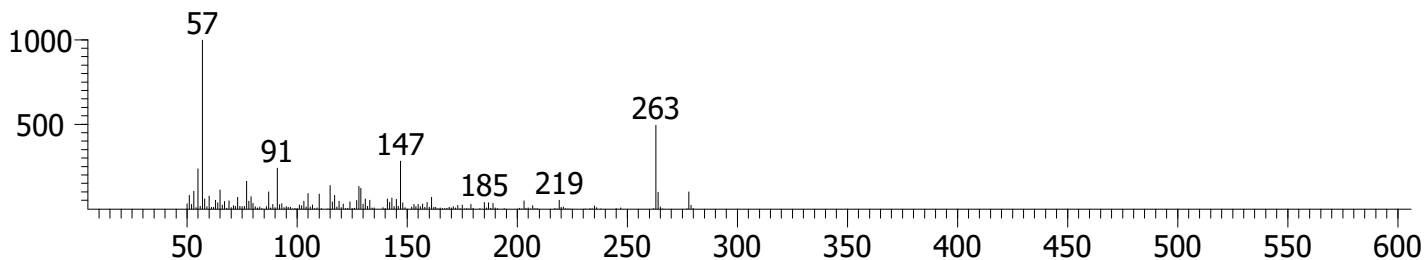

Library Hit - similarity 798, "3,5-di-tert-Butyl-4-hydroxyphenylpropionic acid"

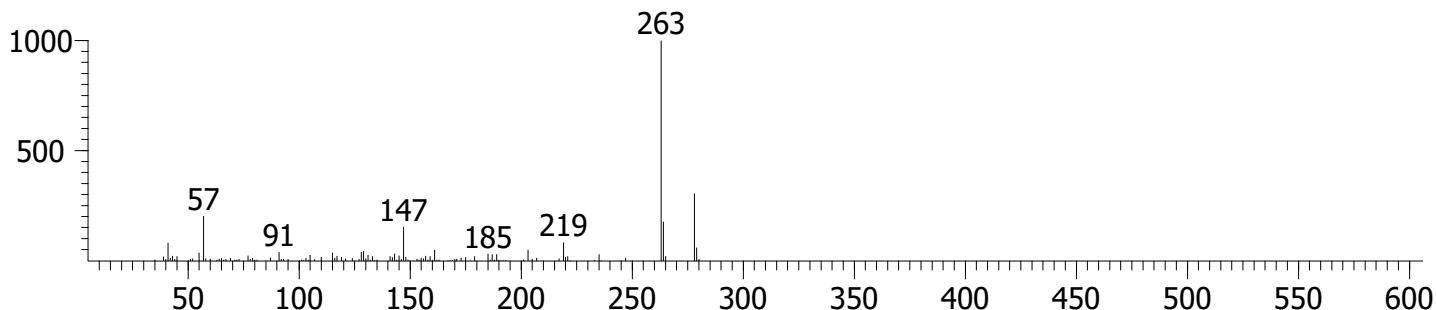

| Hit | Name                                                             | Similarity | Probability | CAS        | Library | Formula  | Weight |
|-----|------------------------------------------------------------------|------------|-------------|------------|---------|----------|--------|
| 1   | 3,5-di-tert-Butyl-4-hydroxyphenylpropionic acid                  | 798        | 9043        | 20170-32-5 | mainlib | C17H26O3 | 278    |
| 2   | Benzoic acid, 3,5-bis(1,1-dimethylethyl)-4-hydroxy-, ethyl ester | 692        | 607         | 1620-64-0  | mainlib | C17H26O3 | 278    |
| 3   | 1,4-Dihydrophenacetic acid, 3,5-di-t-butyl-, ethyl ester         | 665        | 178         | 0-00-0     | mainlib | C18H30O2 | 278    |
| 4   | 2,4,6-Tri-t-butylbenzenethiol                                    | 629        | 44          | 961-39-7   | mainlib | C18H30S  | 278    |
| 5   | Panaxydol                                                        | 610        | 21          | 72800-72-7 | mainlib | C17H24O2 | 260    |

## 1,2-Benzenediacetonitrile

1st Dimension R.T. = 1788.25  
2nd Dimension R.T. = 2.732  
Quant Mass(es) = 129  
S/N = 738.88  
Area = 144650  
Height = 10559  
Similarity = 801

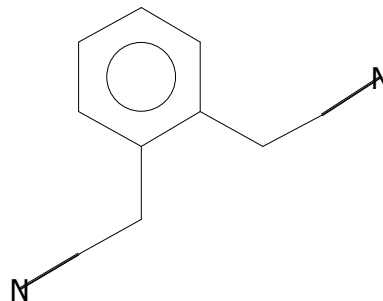

Peak Apex - sample "AerMBR A 092319 (20191119):1", peak 2753, at 1788.25 , 2.732 sec , sec (Spec # 1986 34)

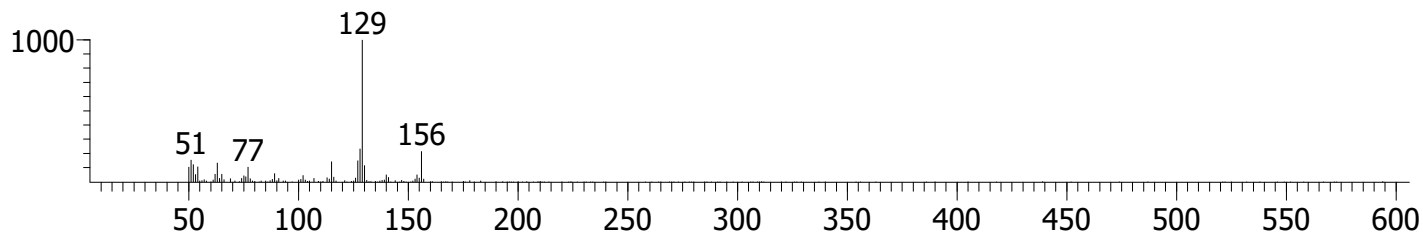

Peak True - sample "AerMBR A 092319 (20191119):1", peak 2753, at 1788.25 , 2.732 sec , sec (Spec # 1986 34)

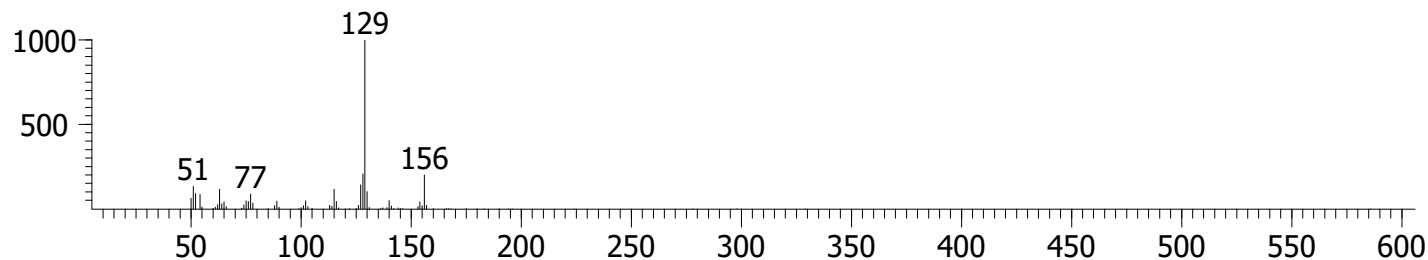

Library Hit - similarity 801, "1,2-Benzenediacetonitrile"

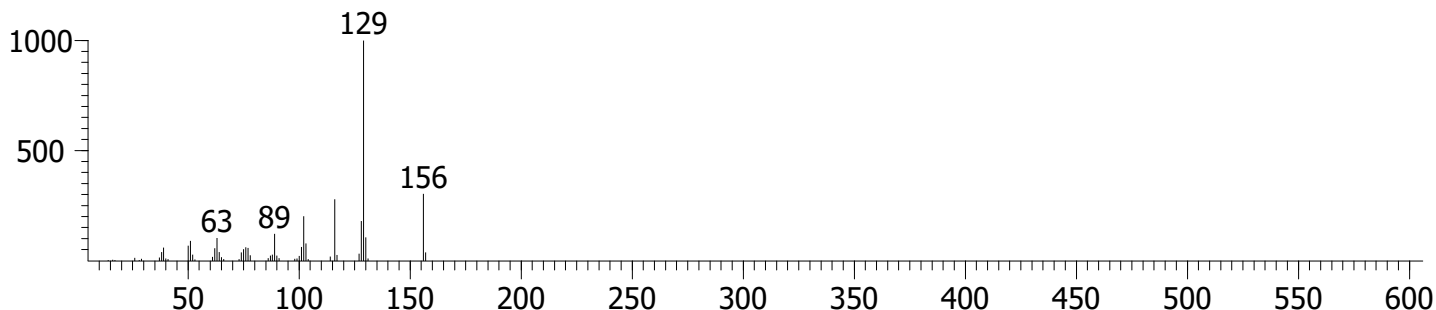

| Hit | Name                                                     | Similarity | Probability | CAS        | Library | Formula  | Weight |
|-----|----------------------------------------------------------|------------|-------------|------------|---------|----------|--------|
| 1   | 1,2-Benzenediacetonitrile                                | 801        | 1770        | 613-73-0   | mainlib | C10H8N2  | 156    |
| 2   | 2-Phenyl-2-(prop-2-en-1-yl)pent-4-enenitrile             | 799        | 1632        | 28049-67-4 | mainlib | C14H15N  | 197    |
| 3   | Cyclopropene, 2,3-dimethyl-3-phenyl-                     | 782        | 891         | 0-00-0     | mainlib | C11H12   | 144    |
| 4   | 2-[1-(4-Cyano-1,2,3,4-tetrahydronaphthyl)]propanenitrile | 779        | 787         | 57964-39-3 | mainlib | C14H14N2 | 210    |
| 5   | 3-[1-(4-Cyano-1,2,3,4-tetrahydronaphthyl)]propanenitrile | 771        | 587         | 57964-40-6 | mainlib | C14H14N2 | 210    |

## 6-Ethoxy-1,2,3,4-tetrahydro-2,2,4-trimethylquinoline

1st Dimension R.T. = 1837.22

2nd Dimension R.T. = 1.881

Quant Mass(es) = 204

S/N = 452.33

Area = 35340

Height = 3755.8

Similarity = 704

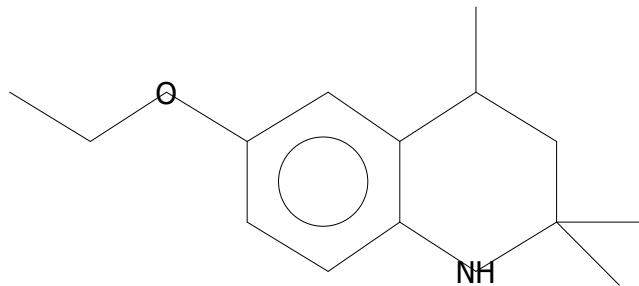

Peak Apex - sample "AerMBR A 092319 (20191119):1", peak 2818, at 1837.22 , 1.881 sec , sec (Spec # 2059 25)

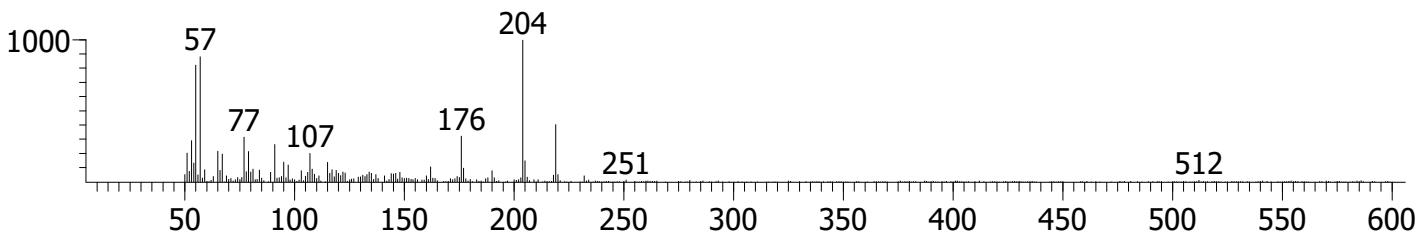

Peak True - sample "AerMBR A 092319 (20191119):1", peak 2818, at 1837.22 , 1.881 sec , sec (Spec # 2059 25)

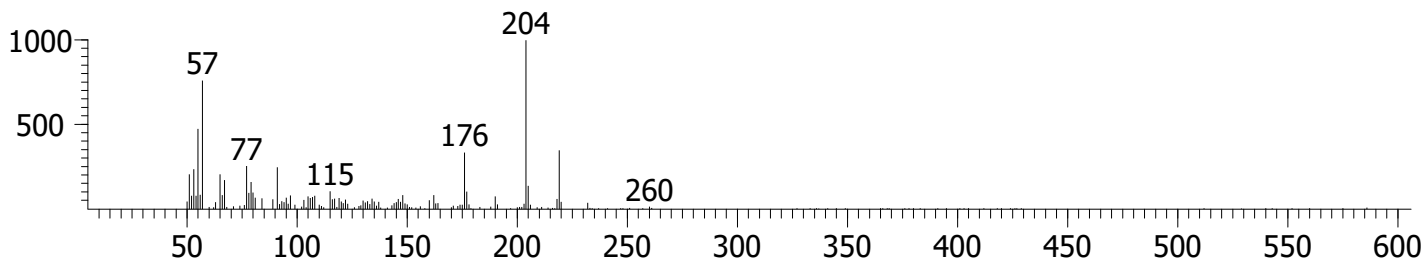

Library Hit - similarity 704, "6-Ethoxy-1,2,3,4-tetrahydro-2,2,4-trimethylquinoline"

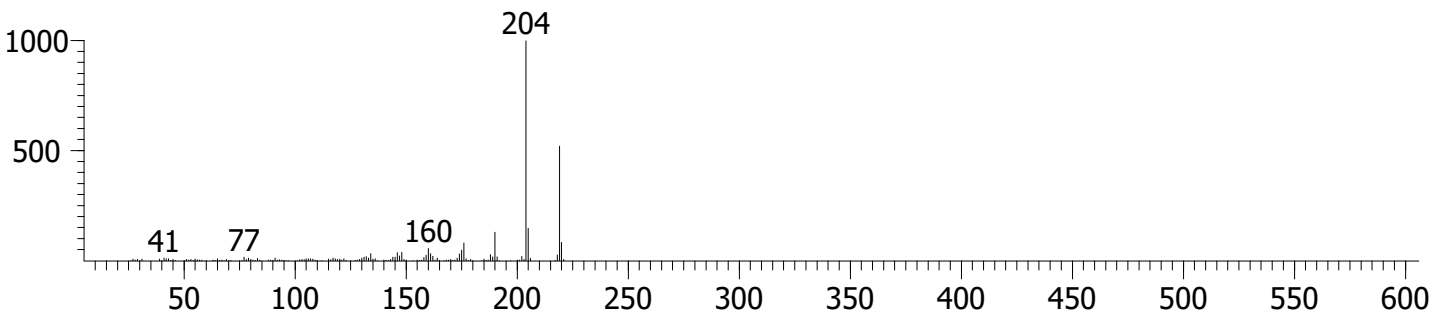

| Hit | Name                                                         | Similarity | Probability | CAS         | Library | Formula   | Weight |
|-----|--------------------------------------------------------------|------------|-------------|-------------|---------|-----------|--------|
| 1   | 6-Ethoxy-1,2,3,4-tetrahydro-2,2,4-trimethylquinoline         | 704        | 3467        | 16489-90-0  | mainlib | C14H21NO  | 219    |
| 2   | 6,7-Dimethoxy-3,3-dimethyl-4H-isoquinoline                   | 680        | 1161        | 148319-42-0 | mainlib | C13H17NO2 | 219    |
| 3   | Pyrrole-3-carbonitrile, 2-amino-1-butyl-(1,1-dimethylethyl)- | 676        | 981         | 340180-56-5 | mainlib | C13H21N3  | 219    |
| 4   | 1-Ethyl-1,2,3,4-tetrahydro-6,7-methylenedioxy-4-oxoquinoline | 664        | 653         | 132767-88-5 | mainlib | C12H13NO3 | 219    |
| 5   | 2(1H)-Quinolinone, 5,8-dimethoxy-4-methyl-                   | 649        | 396         | 0-00-0      | mainlib | C12H13NO3 | 219    |

## Oxybenzone

1st Dimension R.T. = 1837.22  
 2nd Dimension R.T. = 2.303  
 Quant Mass(es) = 227  
 S/N = 621.42  
 Area = 45986  
 Height = 4486.6  
 Similarity = 879

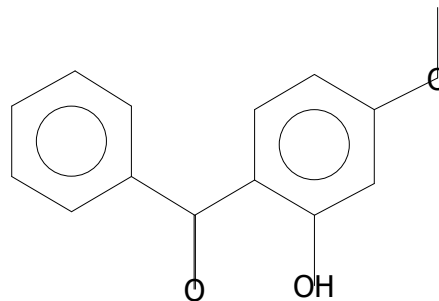

Peak Apex - sample "AerMBR A 092319 (20191119):1", peak 2819, at 1837.22 , 2.303 sec , sec (Spec # 2059 89)

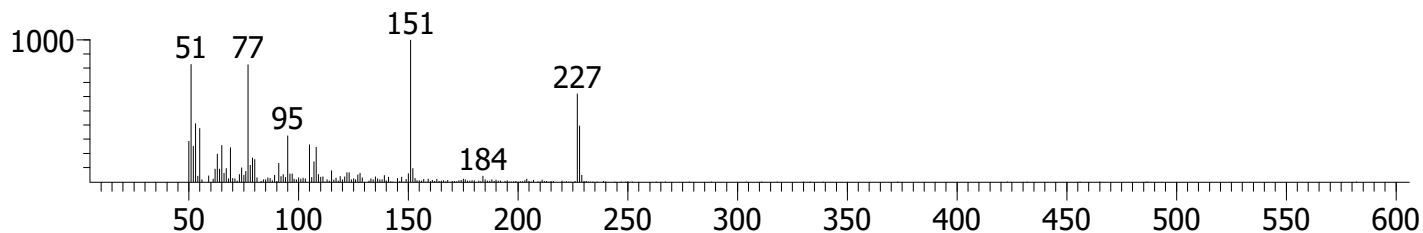

Peak True - sample "AerMBR A 092319 (20191119):1", peak 2819, at 1837.22 , 2.303 sec , sec (Spec # 2059 89)

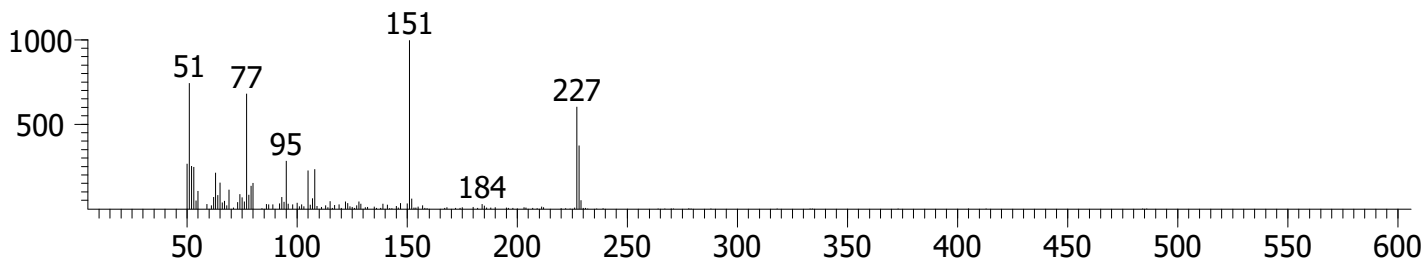

Library Hit - similarity 879, "Oxybenzone"

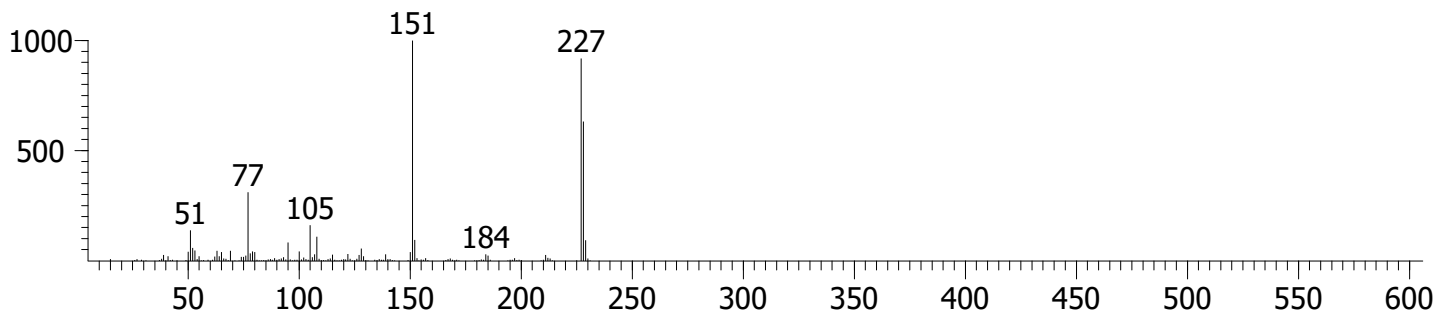

| Hit | Name                                               | Similarity | Probability | CAS        | Library | Formula     | Weight |
|-----|----------------------------------------------------|------------|-------------|------------|---------|-------------|--------|
| 1   | Oxybenzone                                         | 879        | 9745        | 131-57-7   | mainlib | C14H12O3    | 228    |
| 2   | Benzophenone, 2'-hydroxy-5'-methoxy-               | 697        | 167         | 14770-96-8 | mainlib | C14H12O3    | 228    |
| 3   | Sulisobenzone                                      | 653        | 36          | 4065-45-6  | mainlib | C14H12O6S   | 308    |
| 4   | Benzoic acid, 1-cyanoquinuclidin-1-yl ester        | 600        | 7           | 0-00-0     | mainlib | C15H16N2O2  | 256    |
| 5   | Thiourea, 1-(3-hydroxyphenyl)-3-(4-phenoxyphenyl)- | 590        | 5           | 0-00-0     | mainlib | C19H16N2O2S | 336    |

## Acridine-9-carbaldehyde

1st Dimension R.T. = 1879.2  
2nd Dimension R.T. = 2.607  
Quant Mass(es) = 179  
S/N = 3366.6  
Area = 878318  
Height = 74132  
Similarity = 763

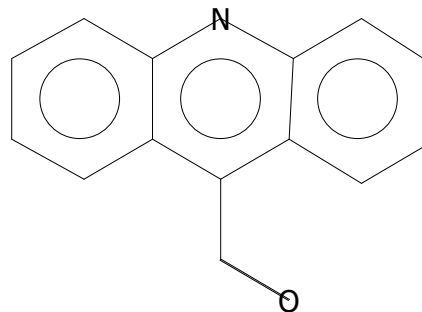

Peak Apex - sample "AerMBR A 092319 (20191119):1", peak 2876, at 1879.2 , 2.607 sec , sec (Spec # 21239 5)

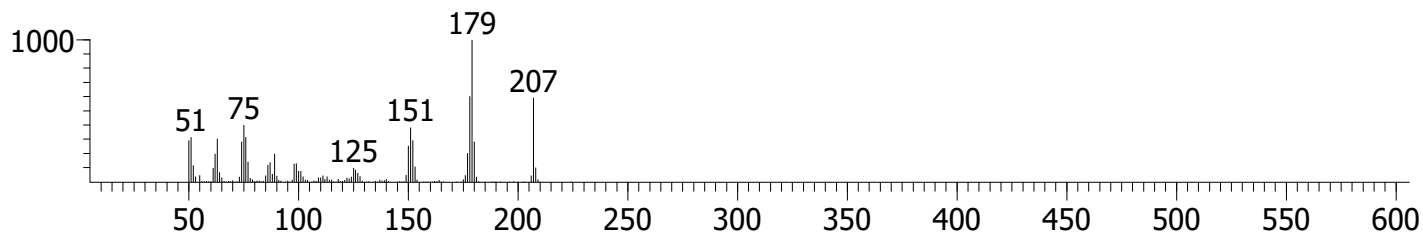

Peak True - sample "AerMBR A 092319 (20191119):1", peak 2876, at 1879.2 , 2.607 sec , sec (Spec # 21239 5)

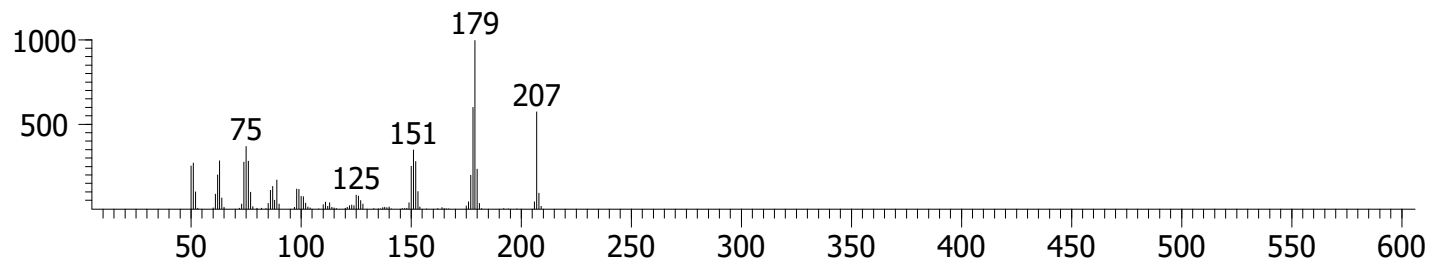

Library Hit - similarity 763, "Acridine-9-carbaldehyde"

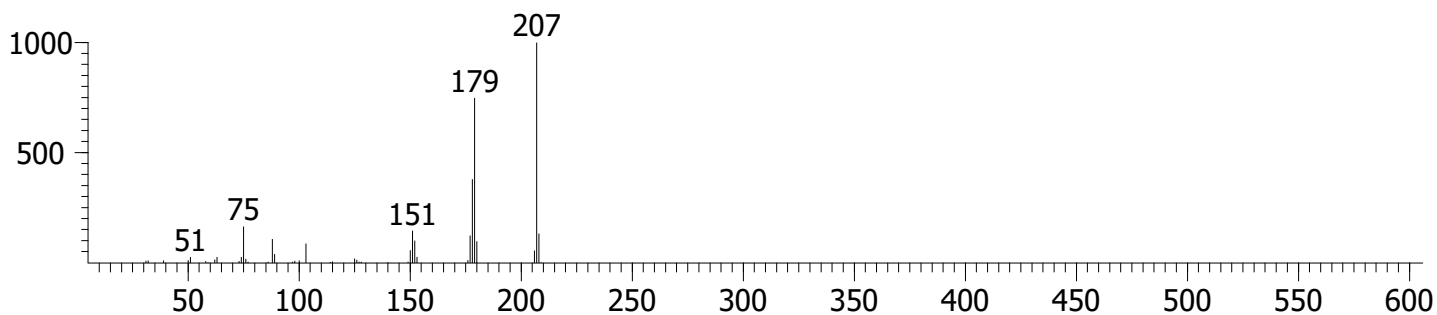

| Hit | Name                    | Similarity | Probability | CAS       | Library | Formula | Weight |
|-----|-------------------------|------------|-------------|-----------|---------|---------|--------|
| 1   | Acridine                | 807        | 3584        | 260-94-6  | mainlib | C13H9N  | 179    |
| 2   | Phenanthridine          | 801        | 2817        | 229-87-8  | mainlib | C13H9N  | 179    |
| 3   | Benzo[f]quinoline       | 775        | 844         | 85-02-9   | mainlib | C13H9N  | 179    |
| 4   | Acridine-9-carbaldehyde | 763        | 562         | 0-00-0    | mainlib | C14H9NO | 207    |
| 5   | p-Phenylbenzotrile      | 752        | 385         | 2920-38-9 | mainlib | C13H9N  | 179    |

# Triclosan

1st Dimension R.T. = 1910.68  
 2nd Dimension R.T. = 2.125  
 Quant Mass(es) = 218  
 S/N = 928.03  
 Area = 104651  
 Height = 10772  
 Similarity = 847

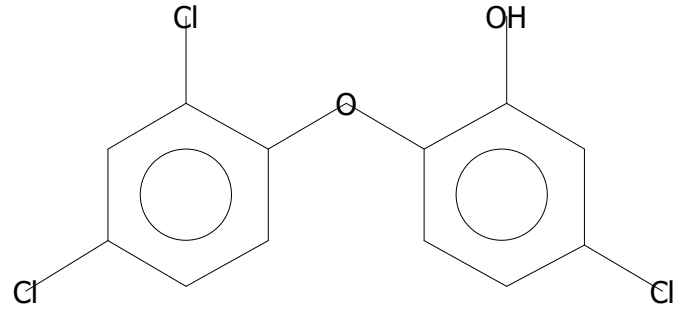

Peak Apex - sample "AerMBR A 092319 (20191119):1", peak 2911, at 1910.68 , 2.125 sec , sec (Spec # 2170 92)

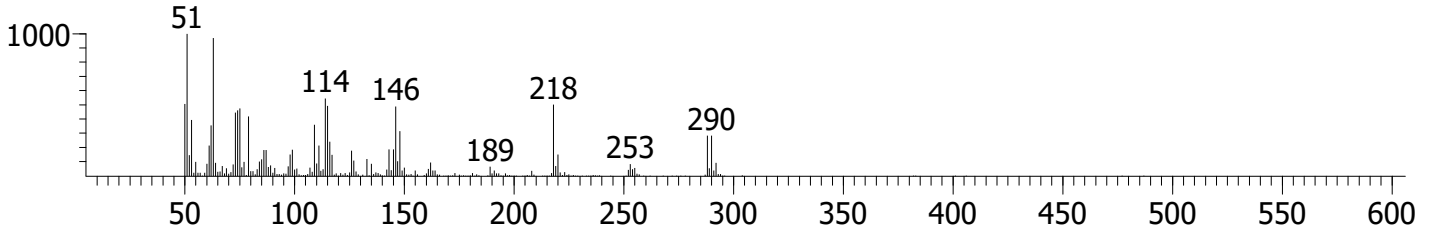

Peak True - sample "AerMBR A 092319 (20191119):1", peak 2911, at 1910.68 , 2.125 sec , sec (Spec # 2170 92)

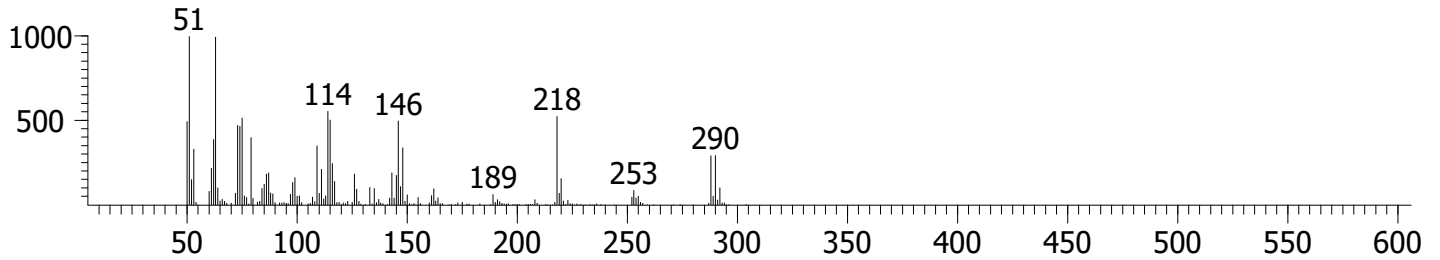

Library Hit - similarity 847, "Triclosan"

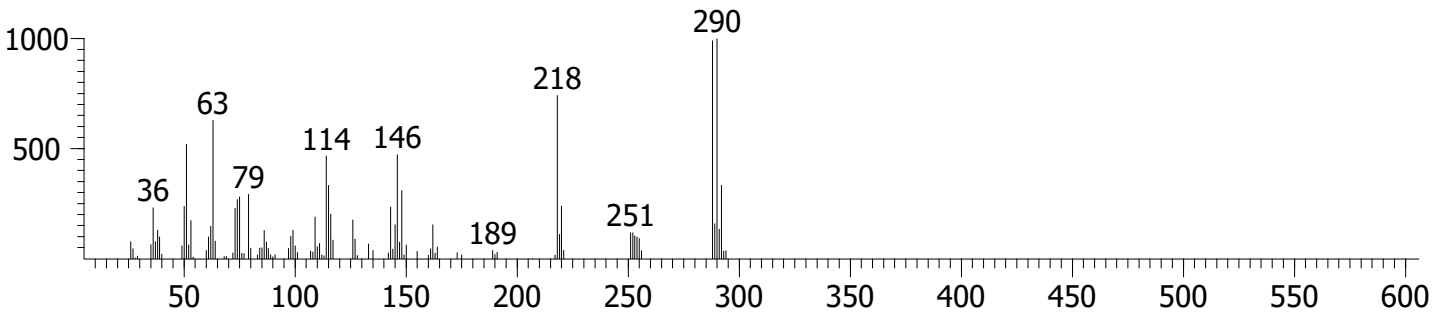

| Hit | Name                                               | Similarity | Probability | CAS        | Library | Formula                                                        | Weight |
|-----|----------------------------------------------------|------------|-------------|------------|---------|----------------------------------------------------------------|--------|
| 1   | Triclosan                                          | 847        | 9845        | 3380-34-5  | mainlib | C <sub>12</sub> H <sub>7</sub> Cl <sub>3</sub> O <sub>2</sub>  | 288    |
| 2   | Phenol, 5-chloro-2-(2,4-dichlorophenoxy)-, acetate | 643        | 98          | 4623-99-8  | mainlib | C <sub>14</sub> H <sub>9</sub> Cl <sub>3</sub> O <sub>3</sub>  | 330    |
| 3   | 6-Chloro-N-(2-chlorophenyl)quinolin-4-amine        | 620        | 35          | 0-00-0     | mainlib | C <sub>15</sub> H <sub>10</sub> Cl <sub>2</sub> N <sub>2</sub> | 288    |
| 4   | 6-Chloro-N-(3-chlorophenyl)quinolin-4-amine        | 588        | 9           | 0-00-0     | mainlib | C <sub>15</sub> H <sub>10</sub> Cl <sub>2</sub> N <sub>2</sub> | 288    |
| 5   | 1,1'-Biphenyl, 2,3,3',4,4',5-hexachloro-           | 498        | 0           | 38380-08-4 | mainlib | C <sub>12</sub> H <sub>4</sub> Cl <sub>6</sub>                 | 358    |

## Benzene.

### 4-chloro-1-(2,4-dichlorophenoxy)-2-methoxy-

1st Dimension R.T. = 1921.18

2nd Dimension R.T. = 2.178

Quant Mass(es) = 252

S/N = 1389.9

Area = 93740

Height = 9329.4

Similarity = 855

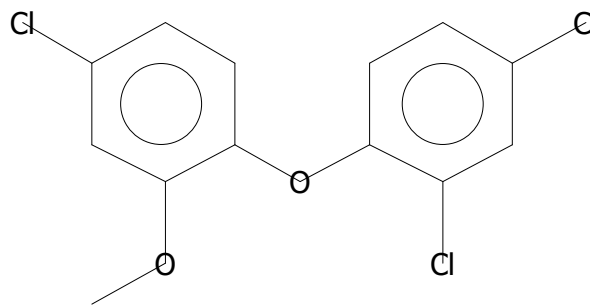

Peak Apex - sample "AerMBR A 092319 (20191119):1", peak 2926, at 1921.18 , 2.178 sec , sec (Spec # 2186 90)

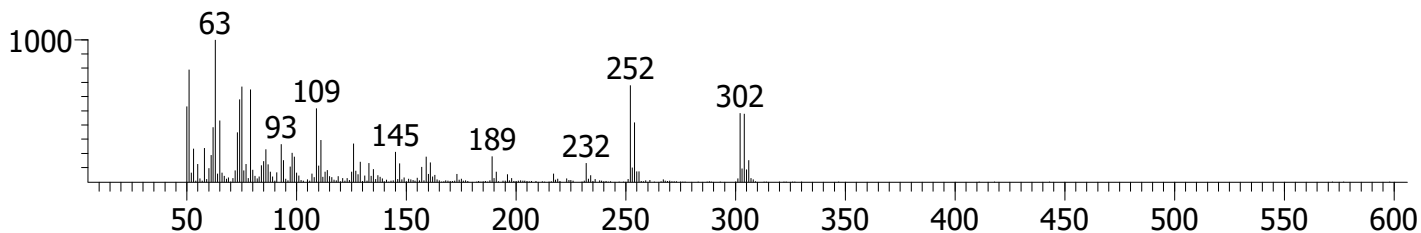

Peak True - sample "AerMBR A 092319 (20191119):1", peak 2926, at 1921.18 , 2.178 sec , sec (Spec # 2186 90)

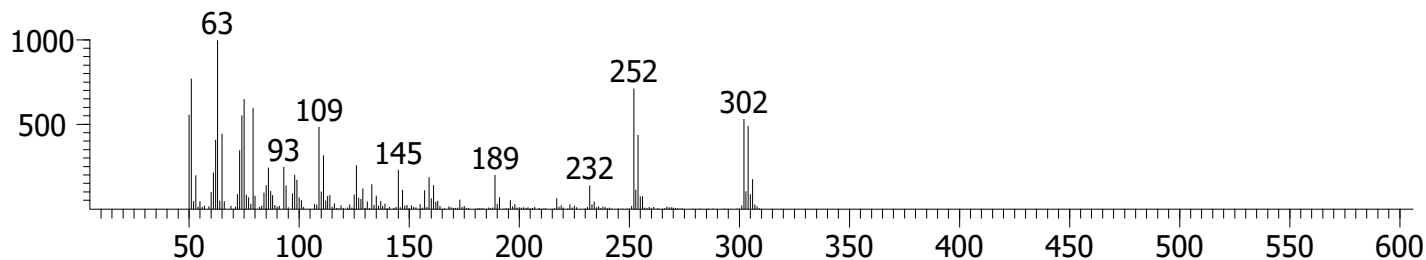

Library Hit - similarity 855, "Benzene, 4-chloro-1-(2,4-dichlorophenoxy)-2-methoxy-"

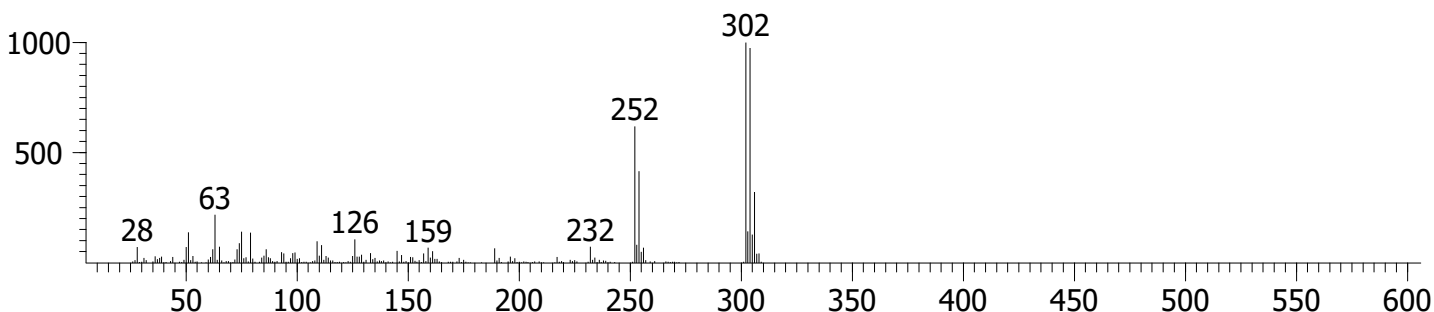

| Hit | Name                                                               | Similarity | Probability | CAS         | Library | Formula     | Weight |
|-----|--------------------------------------------------------------------|------------|-------------|-------------|---------|-------------|--------|
| 1   | Benzene, 4-chloro-1-(2,4-dichlorophenoxy)-2-methoxy-               | 855        | 9773        | 4640-01-1   | mainlib | C13H9Cl3O2  | 302    |
| 2   | Dibenzo[b,e][1,4]dioxin, 2,3-dichloro-                             | 559        | 97          | 29446-15-9  | mainlib | C12H6Cl2O2  | 252    |
| 3   | 1,6-Methano-1H-indene, 2,3,4,5,7-pentachloro-3a,6,7,7a-tetrahydro- | 517        | 21          | 69743-79-9  | mainlib | C10H7Cl5    | 302    |
| 4   | 5-Bromo-2,2,3,3-tetrafluoro-2,3-dihydrobenzo[b]thiophen-1-oxide    | 506        | 15          | 146431-26-7 | mainlib | C8H3BrF4OS  | 302    |
| 5   | 4-Chloro-2-methoxyphenol, pentafluoropropionate                    | 500        | 11          | 0-00-0      | mainlib | C10H6ClF5O3 | 304    |

# Pyridine, 4-(diphenylmethyl)-

1st Dimension R.T. = 1921.18  
2nd Dimension R.T. = 2.402  
Quant Mass(es) = 167  
S/N = 229.97  
Area = 36379  
Height = 2862.6  
Similarity = 716

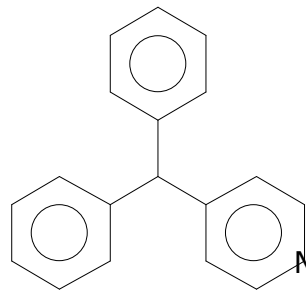

Peak Apex - sample "AerMBR A 092319 (20191119):1", peak 2929, at 1921.18 , 2.402 sec , sec (Spec # 2187 24)

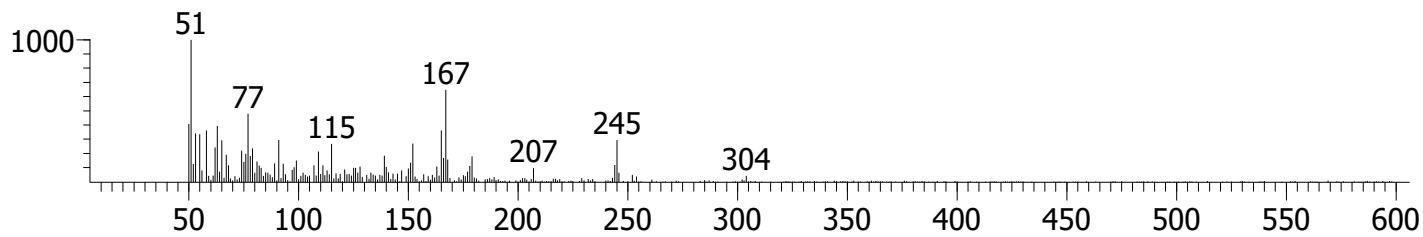

Peak True - sample "AerMBR A 092319 (20191119):1", peak 2929, at 1921.18 , 2.402 sec , sec (Spec # 2187 24)

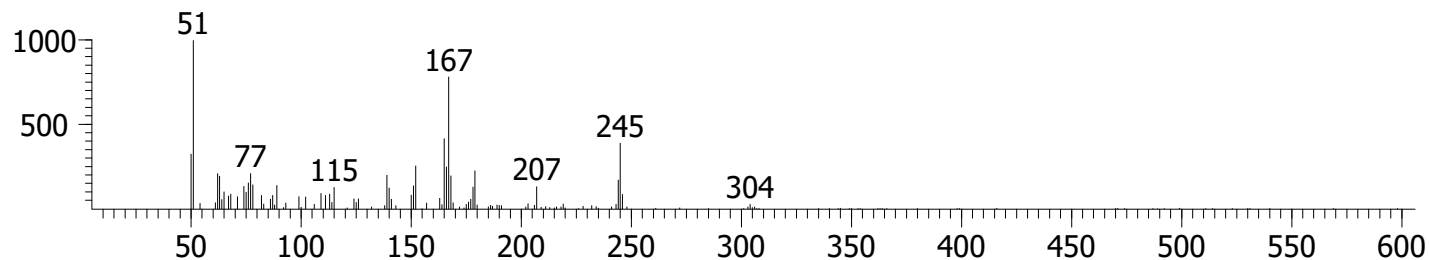

Library Hit - similarity 716, "Pyridine, 4-(diphenylmethyl)-"

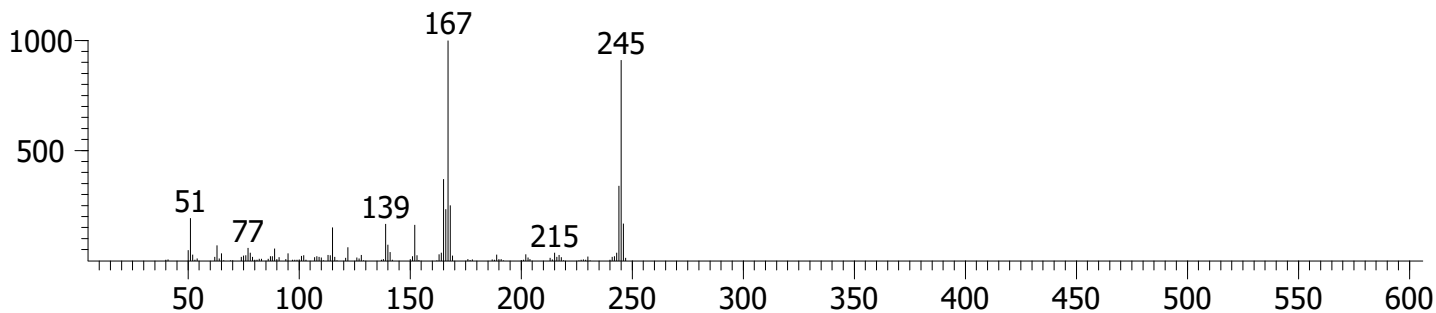

| Hit | Name                                       | Similarity | Probability | CAS         | Library | Formula   | Weight |
|-----|--------------------------------------------|------------|-------------|-------------|---------|-----------|--------|
| 1   | Pyridine, 4-(diphenylmethyl)-              | 716        | 3605        | 3678-72-6   | mainlib | C18H15N   | 245    |
| 2   | Pyridine, 3-(diphenylmethyl)-              | 700        | 2076        | 3678-71-5   | mainlib | C18H15N   | 245    |
| 3   | Pyridine, 2-(diphenylmethyl)-              | 698        | 1915        | 3678-70-4   | mainlib | C18H15N   | 245    |
| 4   | Benzene, 1,1'-(2,2-dichloroethylidene)bis- | 680        | 987         | 2387-16-8   | mainlib | C14H12Cl2 | 250    |
| 5   | 4-Benzylphenylacetonitrile                 | 655        | 301         | 101096-72-4 | mainlib | C15H13N   | 207    |



## Fluconazole

1st Dimension R.T. = 1938.67  
 2nd Dimension R.T. = 2.442  
 Quant Mass(es) = 224  
 S/N = 3820.1  
 Area = 378309  
 Height = 32993  
 Similarity = 908

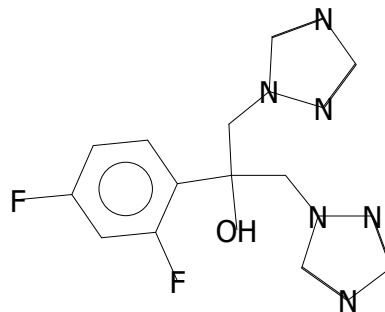

Peak Apex - sample "AerMBR A 092319 (20191119):1", peak 2959, at 1938.67 , 2.442 sec , sec (Spec # 2213 80)

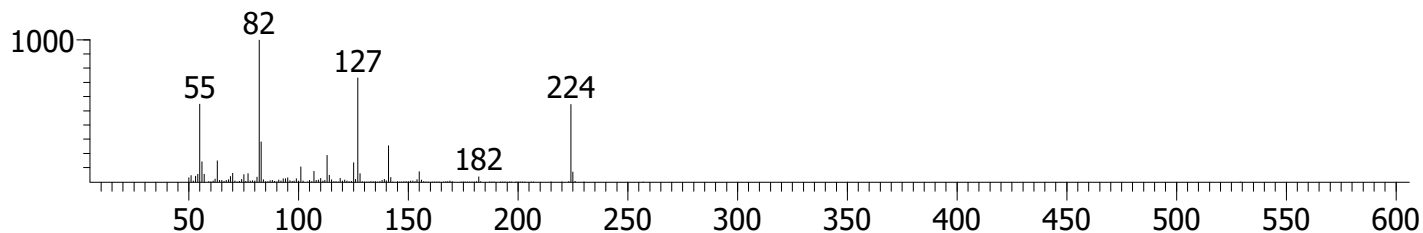

Peak True - sample "AerMBR A 092319 (20191119):1", peak 2959, at 1938.67 , 2.442 sec , sec (Spec # 2213 80)

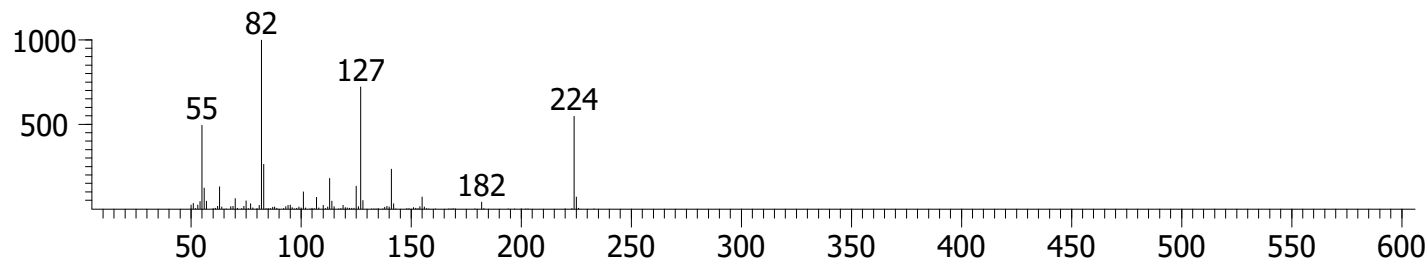

Library Hit - similarity 908, "Fluconazole"

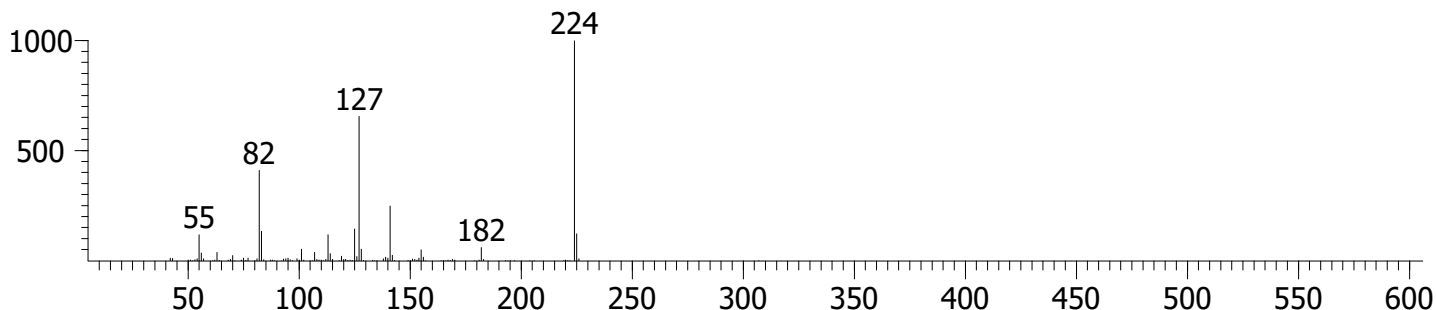

| Hit | Name                                                          | Similarity | Probability | CAS         | Library | Formula                                                         | Weight |
|-----|---------------------------------------------------------------|------------|-------------|-------------|---------|-----------------------------------------------------------------|--------|
| 1   | Fluconazole                                                   | 908        | 9347        | 86386-73-4  | mainlib | C <sub>13</sub> H <sub>12</sub> F <sub>2</sub> N <sub>6</sub> O | 306    |
| 2   | 3-Naphthalen-2-yl-3-piperidin-1-yl-propan-1-ol                | 524        | 93          | 0-00-0      | mainlib | C <sub>18</sub> H <sub>23</sub> NO                              | 269    |
| 3   | Voriconazole                                                  | 509        | 56          | 137234-62-9 | mainlib | C <sub>16</sub> H <sub>14</sub> F <sub>3</sub> N <sub>5</sub> O | 349    |
| 4   | 1,3,2-Dioxaborolane, 2-(cyclohexyloxy)-                       | 505        | 47          | 55089-04-8  | mainlib | C <sub>8</sub> H <sub>15</sub> BO <sub>3</sub>                  | 170    |
| 5   | 1-[2-(2,4-Difluoro-phenyl)-oxiranylmethyl]-1H-[1,2,4]triazole | 503        | 44          | 0-00-0      | mainlib | C <sub>11</sub> H <sub>9</sub> F <sub>2</sub> N <sub>3</sub> O  | 237    |

# 4-(2-(4-Formylphenyl)ethenyl)pyridine

1st Dimension R.T. = 1970.15  
2nd Dimension R.T. = 2.805  
Quant Mass(es) = 209  
S/N = 305.85  
Area = 44343  
Height = 3399.4  
Similarity = 816

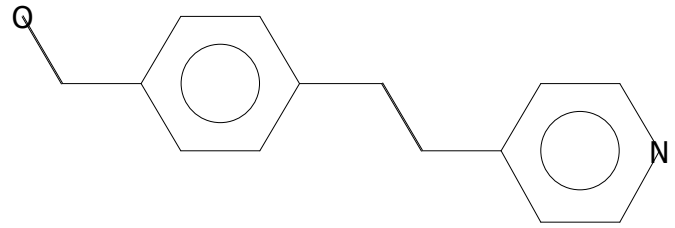

Peak Apex - sample "AerMBR A 092319 (20191119):1", peak 3005, at 1970.15 , 2.805 sec , sec (Spec # 2262 05)

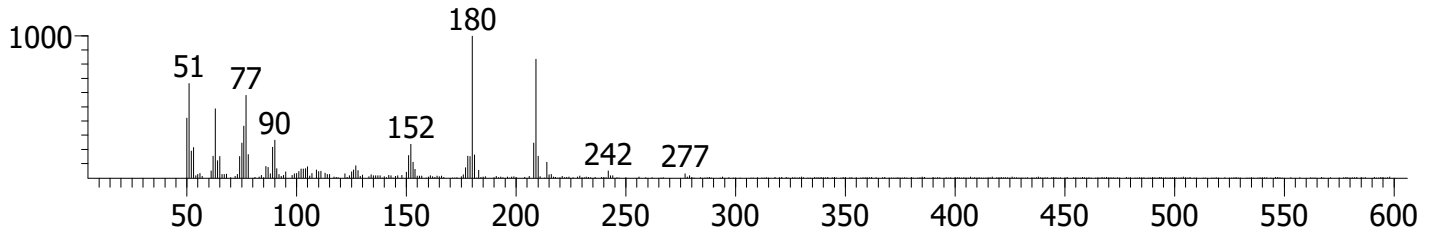

Peak True - sample "AerMBR A 092319 (20191119):1", peak 3005, at 1970.15 , 2.805 sec , sec (Spec # 2262 05)

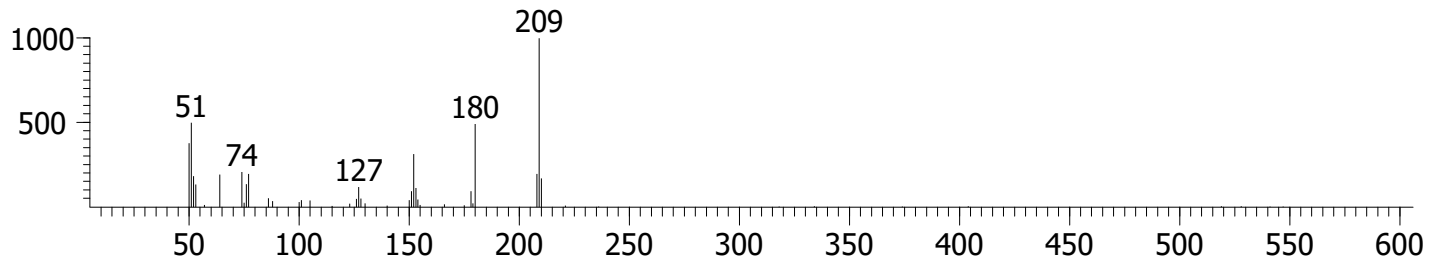

Library Hit - similarity 816, "4-(2-(4-Formylphenyl)ethenyl)pyridine"

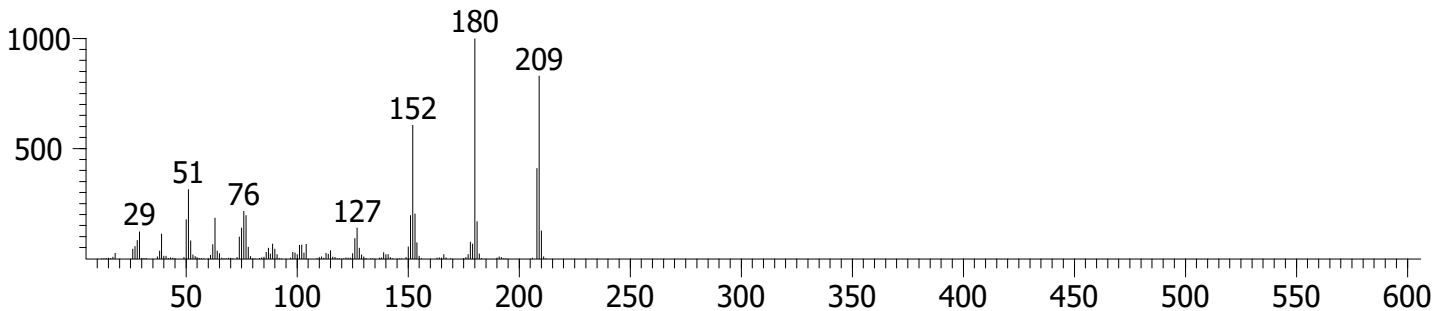

| Hit | Name                                       | Similarity | Probability | CAS        | Library | Formula  | Weight |
|-----|--------------------------------------------|------------|-------------|------------|---------|----------|--------|
| 1   | 4-(2-(4-Formylphenyl)ethenyl)pyridine      | 816        | 2704        | 74401-03-9 | mainlib | C14H11NO | 209    |
| 2   | 5-Benzofuranamine, 2-phenyl-               | 805        | 1855        | 0-00-0     | mainlib | C14H11NO | 209    |
| 3   | 4-Methyl-acridone                          | 804        | 1783        | 68506-36-5 | mainlib | C14H11NO | 209    |
| 4   | 5,11-Dihydro-10H-dibenzo[b,f]azepin-10-one | 795        | 1294        | 21737-58-6 | mainlib | C14H11NO | 209    |
| 5   | Benzo[f]quinolin-1-ol, 3-methyl-           | 772        | 472         | 1210-03-3  | mainlib | C14H11NO | 209    |

## 1,3,7,9-Tetramethyluric acid

1st Dimension R.T. = 2036.61  
2nd Dimension R.T. = 3.010  
Quant Mass(es) = 224  
S/N = 163.87  
Area = 21481  
Height = 1768.8  
Similarity = 807

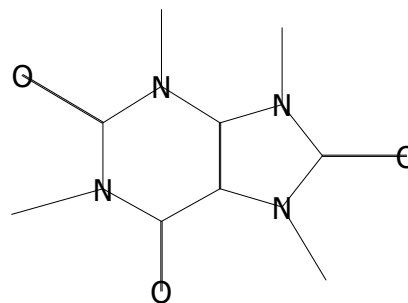

Peak Apex - sample "AerMBR A 092319 (20191119):1", peak 3079, at 2036.61 , 3.010 sec , sec (Spec # 2363 06)

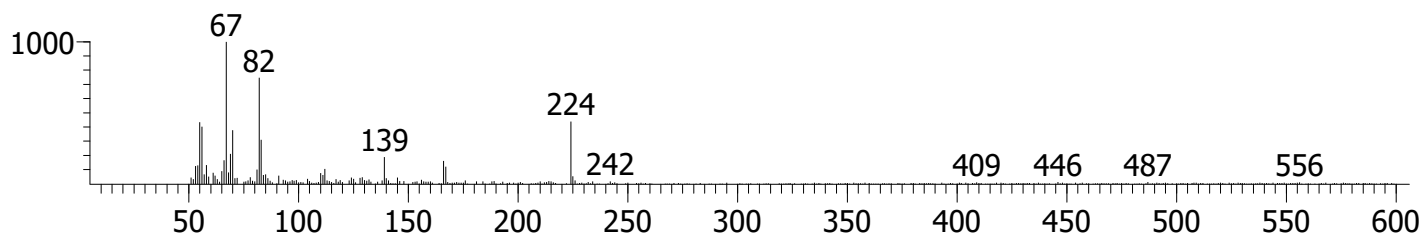

Peak True - sample "AerMBR A 092319 (20191119):1", peak 3079, at 2036.61 , 3.010 sec , sec (Spec # 2363 06)

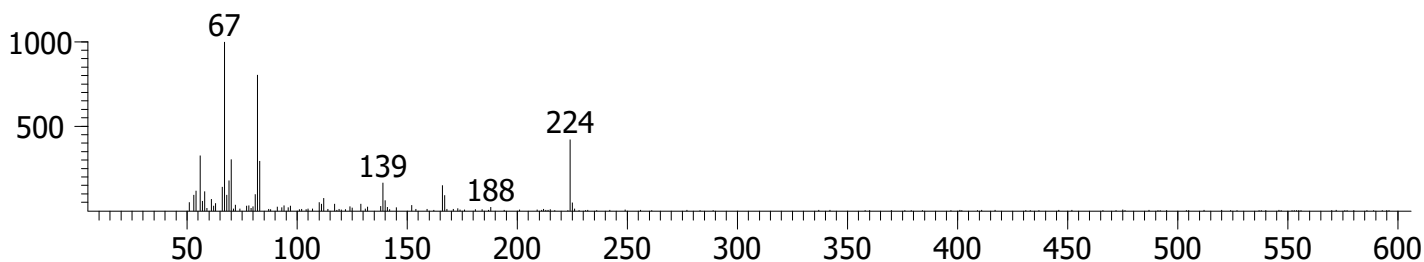

Library Hit - similarity 807, "1,3,7,9-Tetramethyluric acid"

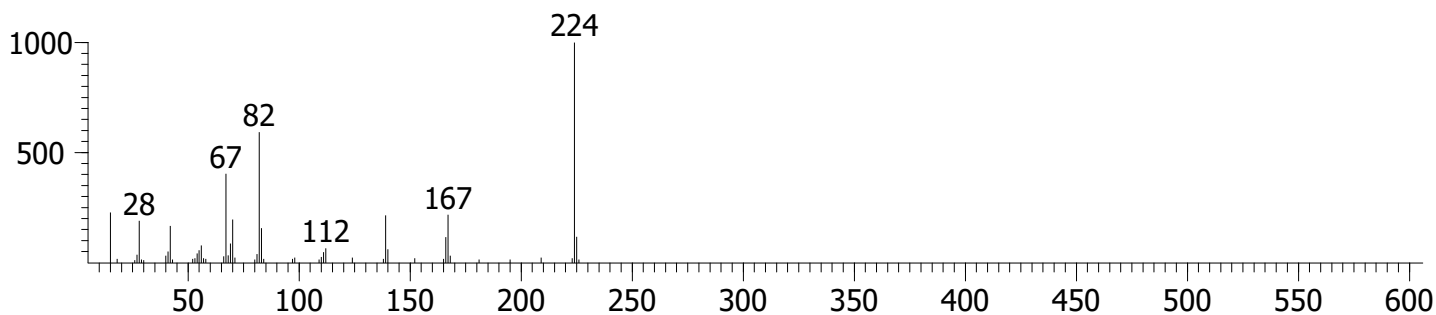

| Hit | Name                                                                                          | Similarity | Probability | CAS       | Library | Formula   | Weight |
|-----|-----------------------------------------------------------------------------------------------|------------|-------------|-----------|---------|-----------|--------|
| 1   | 1,3,7,9-Tetramethyluric acid                                                                  | 807        | 9390        | 2309-49-1 | mainlib | C9H12N4O3 | 224    |
| 2   | 1H-Purine-2,6-dione, 3,7-dihydro-8-(hydroxymethyl)-1,3,7-trimethyl-                           | 633        | 191         | 4921-51-1 | mainlib | C9H12N4O3 | 224    |
| 3   | Acetic acid, trifluoro-, cyclohexyl ester                                                     | 559        | 25          | 1549-45-7 | mainlib | C8H11F3O2 | 196    |
| 4   | 1H-1,2,3-Triazole-5-carboxylic acid, 1-(4-amino-1,2,5-oxadiazol-3-yl)-4-methyl-, methyl ester | 559        | 25          | 0-00-0    | mainlib | C7H8N6O3  | 224    |
| 5   | Cyclohexanol, 2-(aminomethyl)-, trans-                                                        | 544        | 15          | 5691-09-8 | mainlib | C7H15NO   | 129    |

1,2-Benzenedicarboxylic acid,  
2-butoxyethyl butyl ester

1st Dimension R.T. = 2064.59

2nd Dimension R.T. = 2.066

Quant Mass(es) = 149

S/N = 502.35

Area = 68186

Height = 6414.7

Similarity = 893

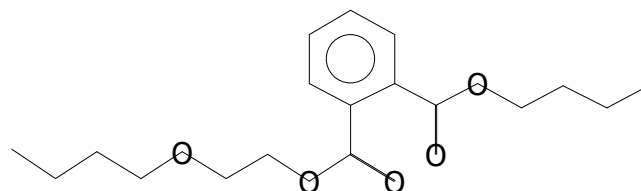

Peak Apex - sample "AerMBR A 092319 (20191119):1", peak 3109, at 2064.59 , 2.066 sec , sec (Spec # 2404 03)

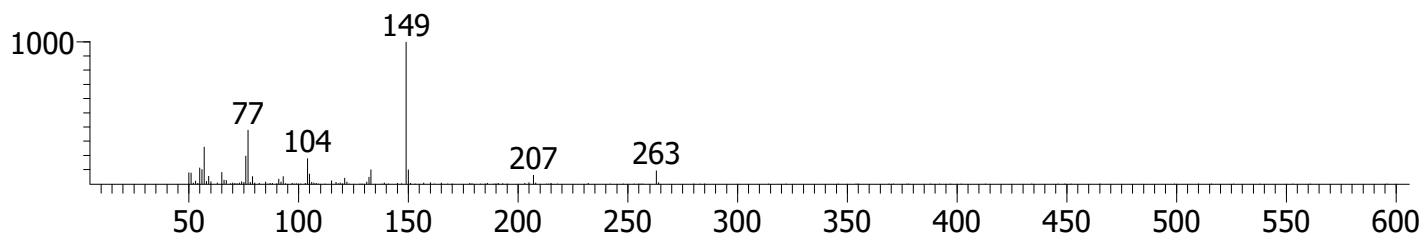

Peak True - sample "AerMBR A 092319 (20191119):1", peak 3109, at 2064.59 , 2.066 sec , sec (Spec # 2404 03)

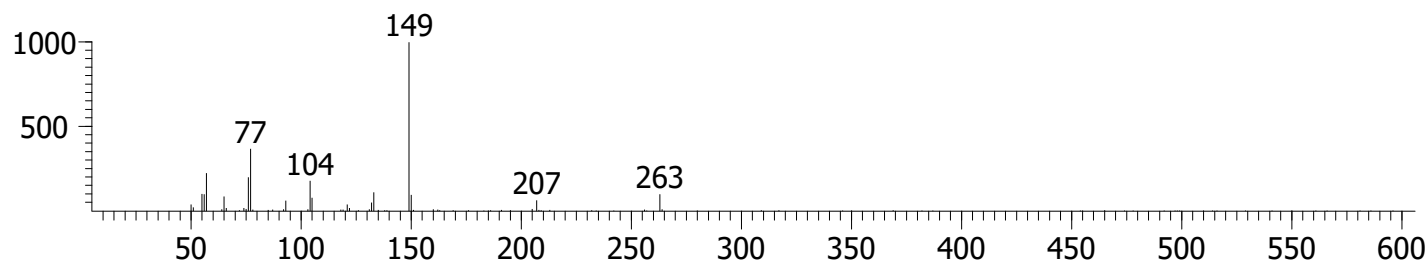

Library Hit - similarity 893, "1,2-Benzenedicarboxylic acid, 2-butoxyethyl butyl ester"

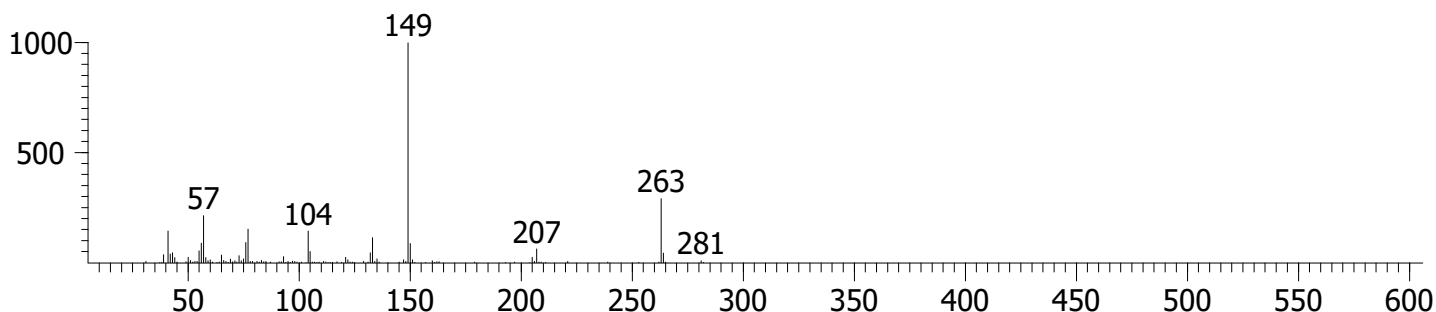

| Hit | Name                                                    | Similarity | Probability | CAS        | Library | Formula    | Weight |
|-----|---------------------------------------------------------|------------|-------------|------------|---------|------------|--------|
| 1   | 1,2-Benzenedicarboxylic acid, 2-butoxyethyl butyl ester | 893        | 8095        | 33374-28-6 | mainlib | C18H26O5   | 322    |
| 2   | Phthalic acid, butyl ester, ester with butyl glycolate  | 808        | 728         | 85-70-1    | mainlib | C18H24O6   | 336    |
| 3   | Phthalic acid, heptyl pentyl ester                      | 740        | 110         | 0-00-0     | mainlib | C20H30O4   | 334    |
| 4   | Phthalic acid, 2-chloropropyl isobutyl ester            | 739        | 106         | 0-00-0     | mainlib | C15H19ClO4 | 298    |
| 5   | Phthalic acid, isobutyl octyl ester                     | 731        | 79          | 0-00-0     | mainlib | C20H30O4   | 334    |

## Primidone

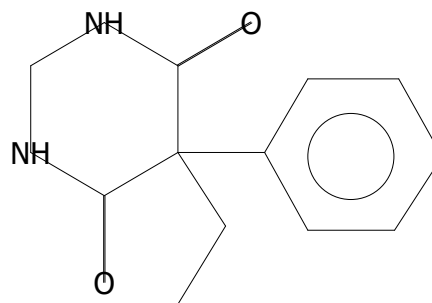

1st Dimension R.T. = 2064.59

2nd Dimension R.T. = 3.485

Quant Mass(es) = 146

S/N = 625.69

Area = 132903

Height = 9054.8

Similarity = 833

Peak Apex - sample "AerMBR A 092319 (20191119):1", peak 3110, at 2064.59 , 3.485 sec , sec (Spec # 2406 18)

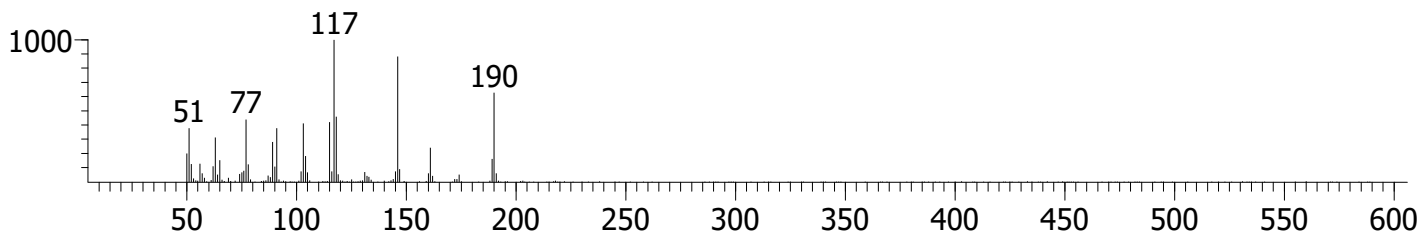

Peak True - sample "AerMBR A 092319 (20191119):1", peak 3110, at 2064.59 , 3.485 sec , sec (Spec # 2406 18)

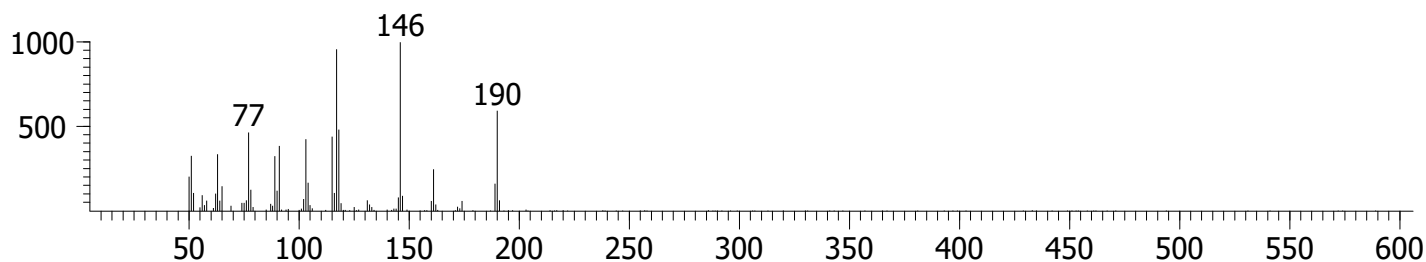

Library Hit - similarity 833, "Primidone"

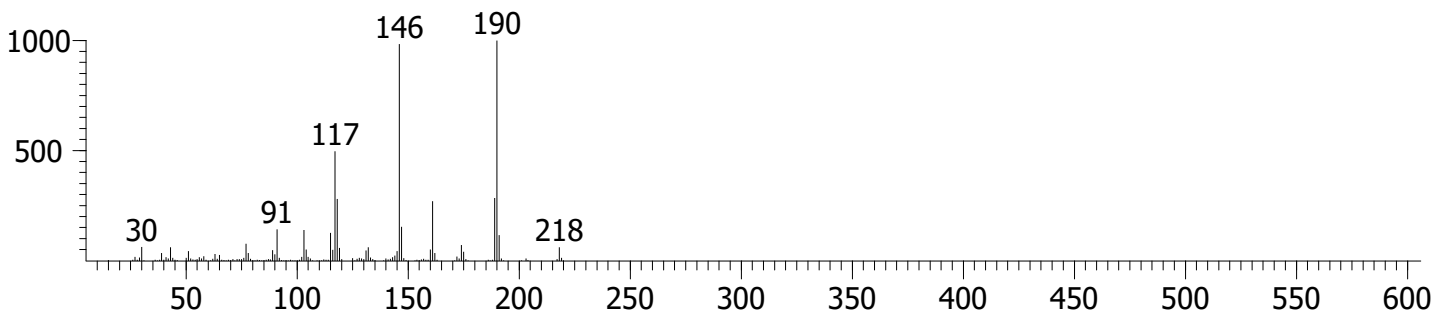

| Hit | Name                                        | Similarity | Probability | CAS        | Library | Formula    | Weight |
|-----|---------------------------------------------|------------|-------------|------------|---------|------------|--------|
| 1   | Primidone                                   | 833        | 7730        | 125-33-7   | mainlib | C12H14N2O2 | 218    |
| 2   | 2,4-Azetidinedione, 3-ethyl-3-phenyl-       | 726        | 513         | 42282-82-6 | mainlib | C11H11NO2  | 189    |
| 3   | Primidone, N,N'-diacetyl-                   | 715        | 352         | 0-00-0     | mainlib | C16H18N2O4 | 302    |
| 4   | 7-Methylindan-1-one                         | 710        | 283         | 39627-61-7 | mainlib | C10H10O    | 146    |
| 5   | 3-Ethyl-3-phenyl-1-methylazetidin-2,4-dione | 690        | 129         | 0-00-0     | mainlib | C12H13NO2  | 203    |

# 1-Propanol, 2,3-dichloro-, phosphate (3:1)

1st Dimension R.T. = 2092.58  
2nd Dimension R.T. = 2.178  
Quant Mass(es) = 75  
S/N = 618.56  
Area = 190283  
Height = 16470  
Similarity = 884

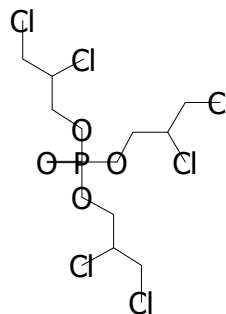

Peak Apex - sample "AerMBR A 092319 (20191119):1", peak 3141, at 2092.58 , 2.178 sec , sec (Spec # 2446 60)

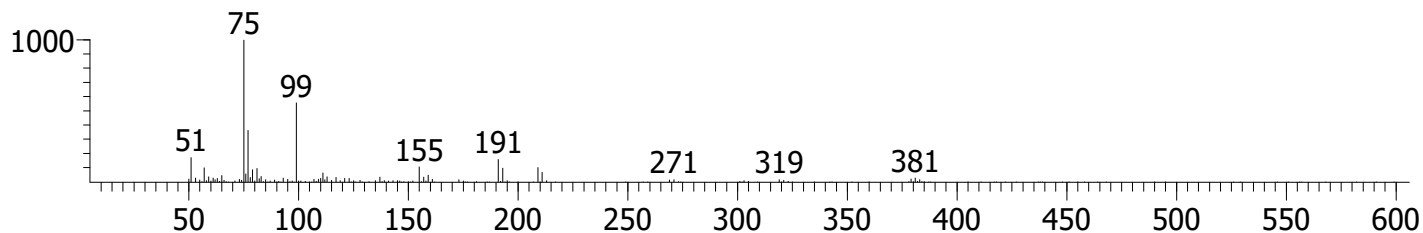

Peak True - sample "AerMBR A 092319 (20191119):1", peak 3141, at 2092.58 , 2.178 sec , sec (Spec # 2446 60)

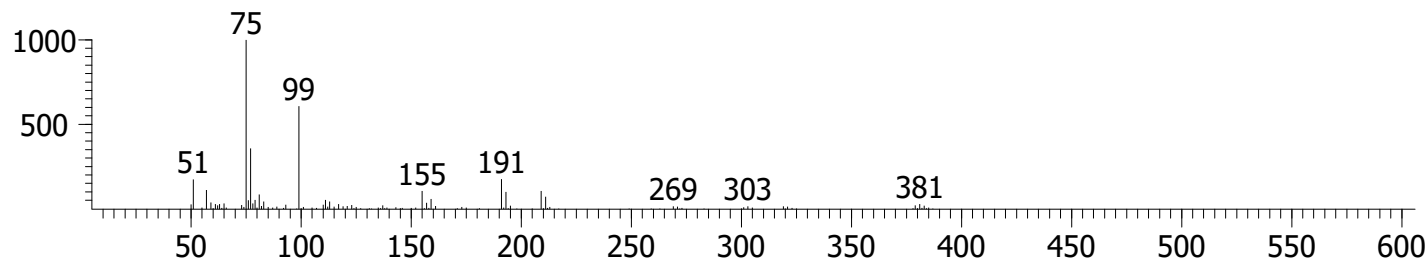

Library Hit - similarity 884, "1-Propanol, 2,3-dichloro-, phosphate (3:1)"

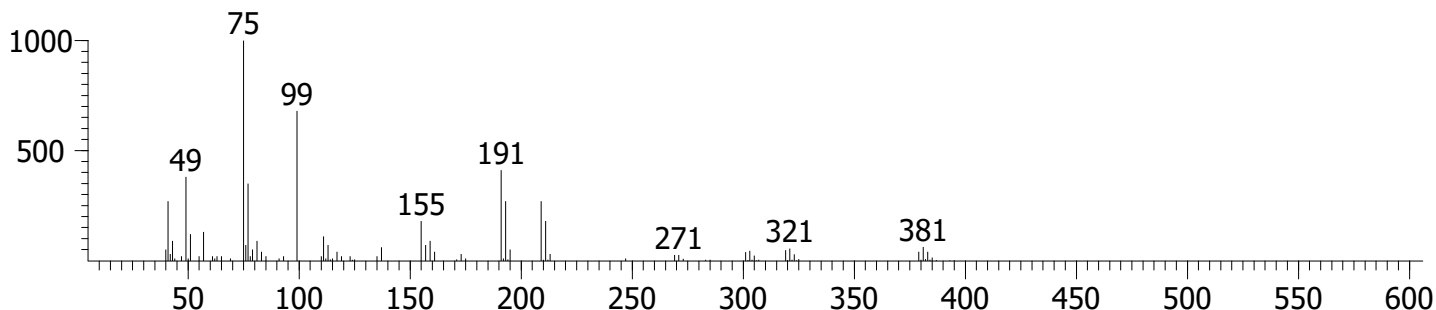

| Hit | Name                                                                          | Similarity | Probability | CAS        | Library | Formula     | Weight |
|-----|-------------------------------------------------------------------------------|------------|-------------|------------|---------|-------------|--------|
| 1   | 1-Propanol, 2,3-dichloro-, phosphate (3:1)                                    | 884        | 9573        | 78-43-3    | mainlib | C9H15Cl6O4P | 428    |
| 2   | Tris(1,3-dichloroisopropyl)phosphate                                          | 756        | 410         | 13674-87-8 | mainlib | C9H15Cl6O4P | 428    |
| 3   | Phosphoric acid, bis[2-chloro-1-(chloromethyl)ethyl] 2,3-dichloropropyl ester | 614        | 13          | 68460-03-7 | mainlib | C9H15Cl6O4P | 428    |
| 4   | Propane, 2,2'-oxybis[1,3-dichloro-                                            | 527        | 1           | 59440-89-0 | mainlib | C6H10Cl4O   | 238    |
| 5   | Propane, 1,2-dichloro-3-[2-chloro-1-(chloromethyl)ethoxy]-                    | 521        | 0           | 59440-90-3 | mainlib | C6H10Cl4O   | 238    |

## Methyl dehydroabietate

1st Dimension R.T. = 2103.07  
 2nd Dimension R.T. = 2.059  
 Quant Mass(es) = 239  
 S/N = 78.094  
 Area = 5732.3  
 Height = 514.60  
 Similarity = 805

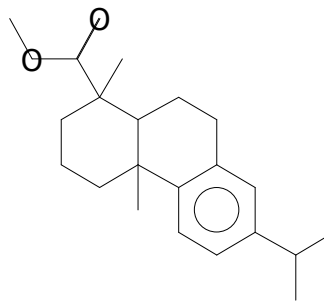

Peak Apex - sample "AerMBR A 092319 (20191119):1", peak 3153, at 2103.07 , 2.059 sec , sec (Spec # 2462 32)

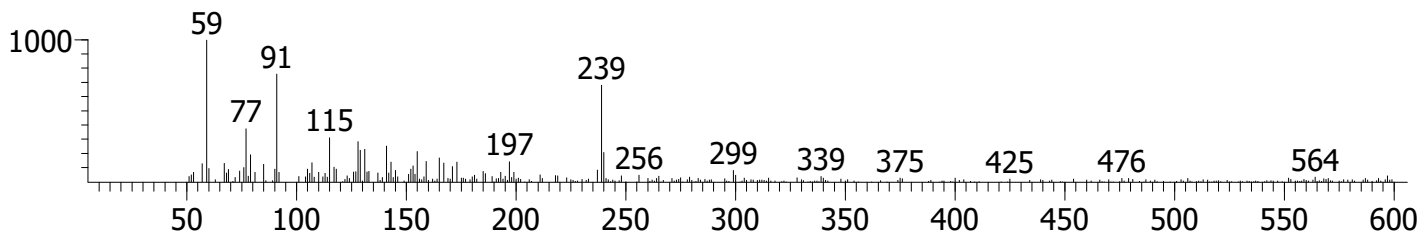

Peak True - sample "AerMBR A 092319 (20191119):1", peak 3153, at 2103.07 , 2.059 sec , sec (Spec # 2462 32)

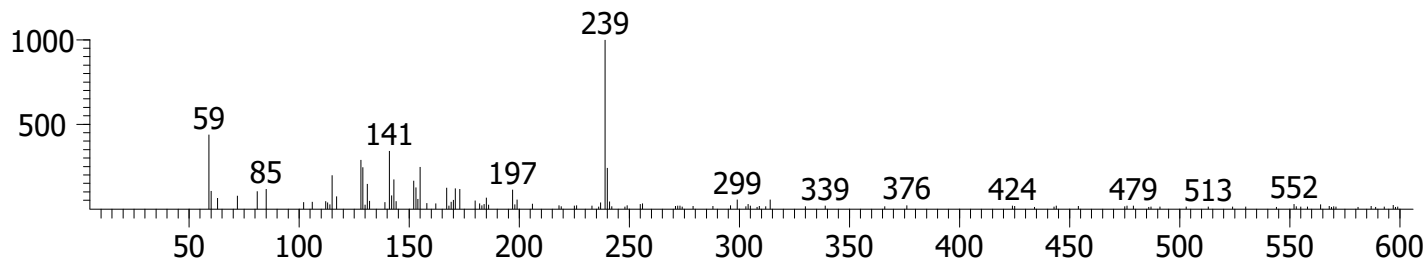

Library Hit - similarity 805, "Methyl dehydroabietate"

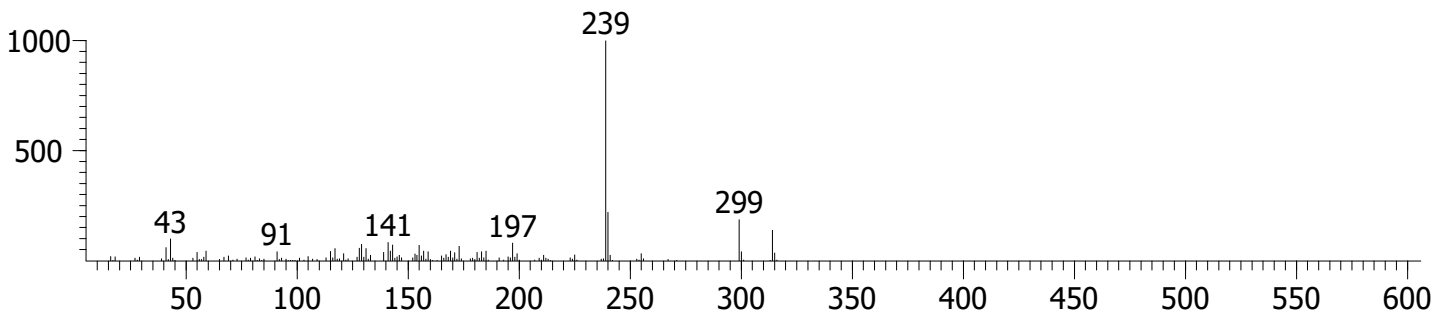

| Hit | Name                                                                                                                             | Similarity | Probability | CAS        | Library | Formula      | Weight |
|-----|----------------------------------------------------------------------------------------------------------------------------------|------------|-------------|------------|---------|--------------|--------|
| 1   | Methyl dehydroabietate                                                                                                           | 805        | 9407        | 1235-74-1  | mainlib | C21H30O2     | 314    |
| 2   | Isobutyl dehydroabietate                                                                                                         | 672        | 370         | 0-00-0     | mainlib | C24H36O2     | 356    |
| 3   | 1-Phenanthrenecarboxylic acid, 1,2,3,4,4a,9,10,10a-octahydro-1,4a-dimethyl-7-(1-methylethyl)-, methyl ester, [1S-(1à,4aà,10aà)]- | 620        | 74          | 24035-60-7 | mainlib | C21H30O2     | 314    |
| 4   | Noroxycodone, N,O-bis(heptafluorobutyl)-                                                                                         | 593        | 21          | 0-00-0     | mainlib | C25H17F14NO6 | 693    |
| 5   | 1H,9H-Pyrrolo[3,2-H]quinolin-6-one, 1,2,3,8-tetramethyl-                                                                         | 583        | 15          | 0-00-0     | mainlib | C15H16N2O    | 240    |

# 2,6-diphenyl-4-methyl-1,4-dihydropyridine-3,5-dicarbonitrile

1st Dimension R.T. = 2106.57  
2nd Dimension R.T. = 2.772  
Quant Mass(es) = 282  
S/N = 443.62  
Area = 48243  
Height = 3732.7  
Similarity = 717

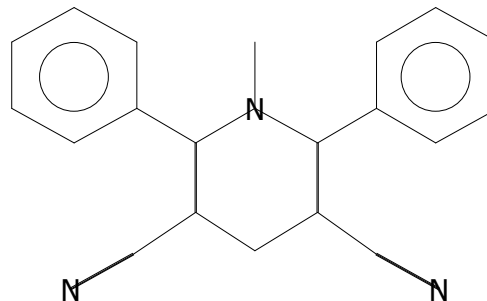

Peak Apex - sample "AerMBR A 092319 (20191119):1", peak 3157, at 2106.57 , 2.772 sec , sec (Spec # 2468 70)

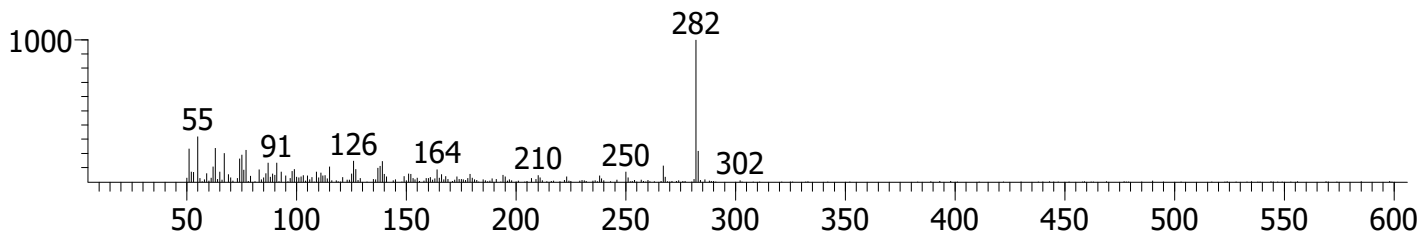

Peak True - sample "AerMBR A 092319 (20191119):1", peak 3157, at 2106.57 , 2.772 sec , sec (Spec # 2468 70)

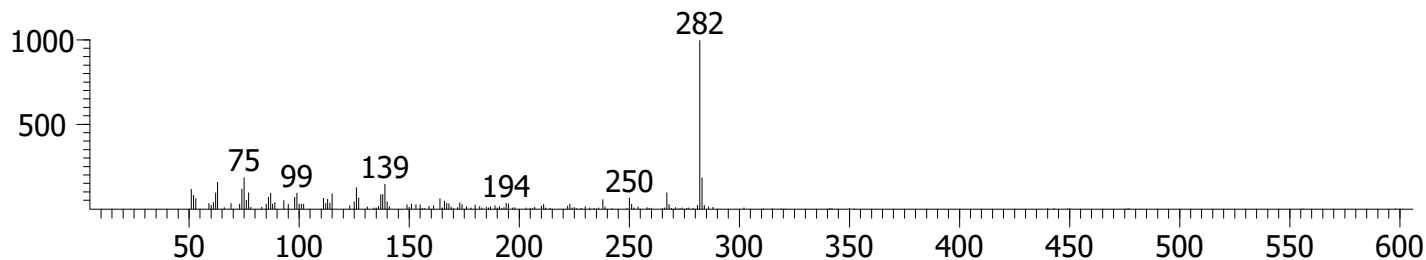

Library Hit - similarity 717, "2,6-Diphenyl-4-methyl-1,4-dihydropyridine-3,5-dicarbonitrile"

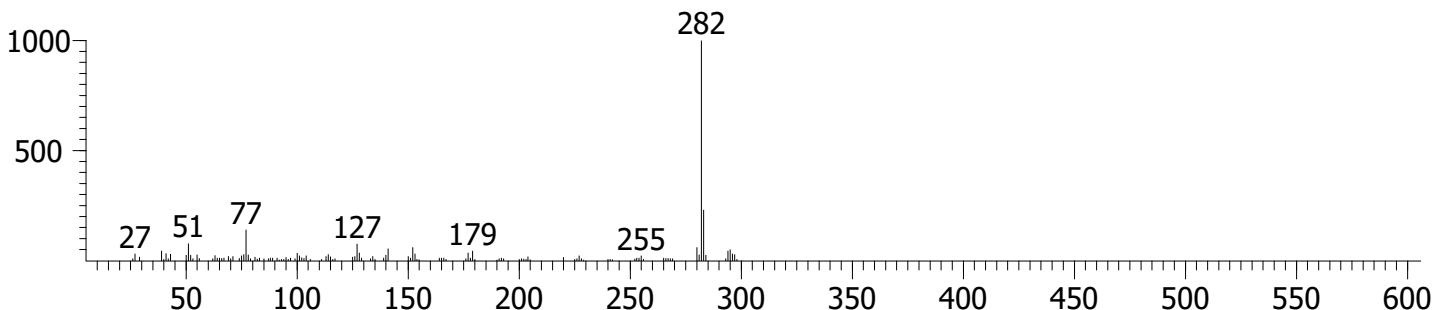

| Hit | Name                                                                                                      | Similarity | Probability | CAS         | Library | Formula    | Weight |
|-----|-----------------------------------------------------------------------------------------------------------|------------|-------------|-------------|---------|------------|--------|
| 1   | 2,6-Diphenyl-4-methyl-1,4-dihydropyridine-3,5-dicarbonitrile                                              | 717        | 3626        | 15521-04-7  | mainlib | C20H15N3   | 297    |
| 2   | 1,3,6-Trimethyl-5-[3-(2-acetylamino-2-methoxycarbonylethyl)-1H-indol-2-yl]-1,3-dihydropyrimidin-2,4-dione | 689        | 1047        | 123760-39-4 | mainlib | C21H24N4O5 | 412    |
| 3   | Carbamic acid, N-[10,11-dihydro-5-(2-methylamino-1-oxoethyl)-3-5H-dibenzo[b,f]azepinyl]-, ethyl ester     | 682        | 802         | 102821-92-1 | mainlib | C20H23N3O3 | 353    |
| 4   | 4-Methoxy-6-[2-(4-methoxyphenyl)ethynyl]-2H-1,3-benzodioxole                                              | 677        | 646         | 0-00-0      | mainlib | C17H14O4   | 282    |
| 5   | 2-Methoxyethylamine, N,N-dinonyl-                                                                         | 670        | 495         | 0-00-0      | mainlib | C21H45NO   | 327    |



## Hexanedioic acid, bis(2-ethylhexyl) ester

1st Dimension R.T. = 2120.56

2nd Dimension R.T. = 1.518

Quant Mass(es) = 129

S/N = 487.27

Area = 63962

Height = 8176.0

Similarity = 904

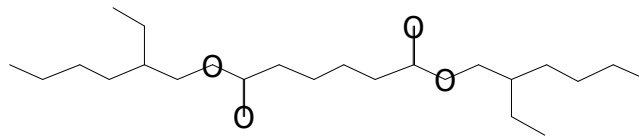

Peak Apex - sample "AerMBR A 092319 (20191119):1", peak 3175, at 2120.56 , 1.518 sec , sec (Spec # 2488 00)

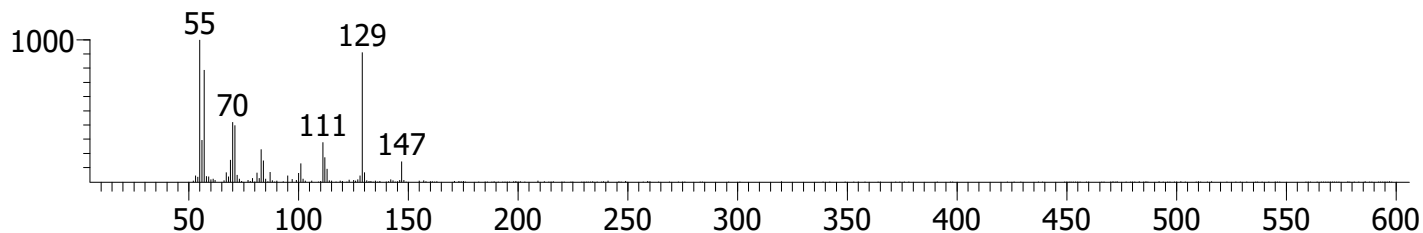

Peak True - sample "AerMBR A 092319 (20191119):1", peak 3175, at 2120.56 , 1.518 sec , sec (Spec # 2488 00)

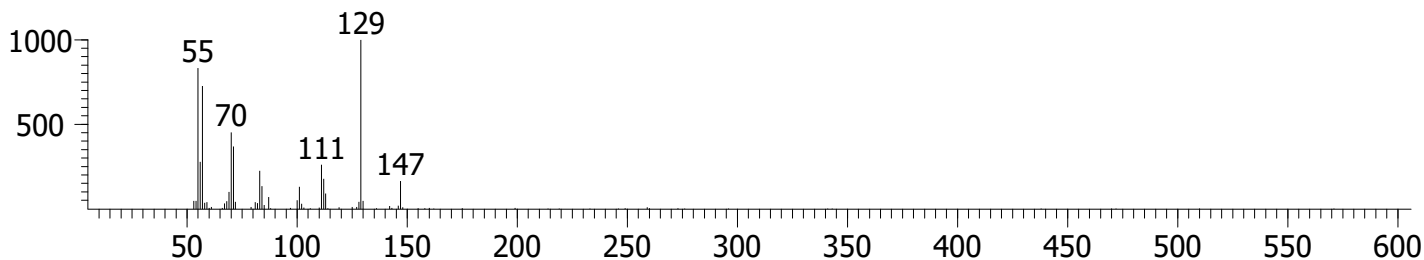

Library Hit - similarity 904, "Hexanedioic acid, bis(2-ethylhexyl) ester"

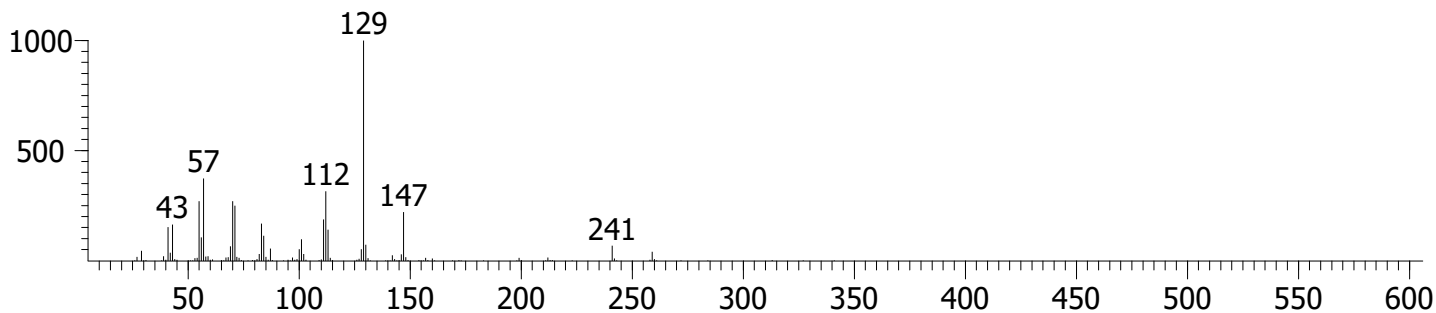

| Hit | Name                                       | Similarity | Probability | CAS       | Library | Formula  | Weight |
|-----|--------------------------------------------|------------|-------------|-----------|---------|----------|--------|
| 1   | Hexanedioic acid, bis(2-ethylhexyl) ester  | 904        | 4597        | 103-23-1  | mainlib | C22H42O4 | 370    |
| 2   | Diisooctyl adipate                         | 888        | 2647        | 1330-86-5 | mainlib | C22H42O4 | 370    |
| 3   | Hexanedioic acid, mono(2-ethylhexyl)ester  | 832        | 504         | 4337-65-9 | mainlib | C14H26O4 | 258    |
| 4   | Hexanedioic acid, dioctyl ester            | 825        | 386         | 123-79-5  | mainlib | C22H42O4 | 370    |
| 5   | Adipic acid, 2-ethylhexyl pentadecyl ester | 820        | 311         | 0-00-0    | mainlib | C29H56O4 | 468    |

# Ethanol, 2-butoxy-, phosphate (3:1)

1st Dimension R.T. = 2134.55  
2nd Dimension R.T. = 1.795  
Quant Mass(es) = 125  
S/N = 359.71  
Area = 33313  
Height = 3782.3  
Similarity = 850

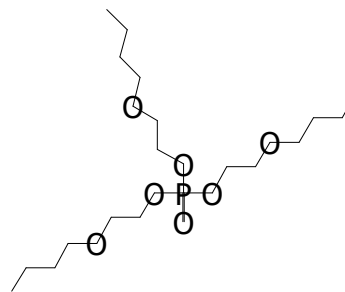

Peak Apex - sample "AerMBR A 092319 (20191119):1", peak 3191, at 2134.55 , 1.795 sec , sec (Spec # 2509 62)

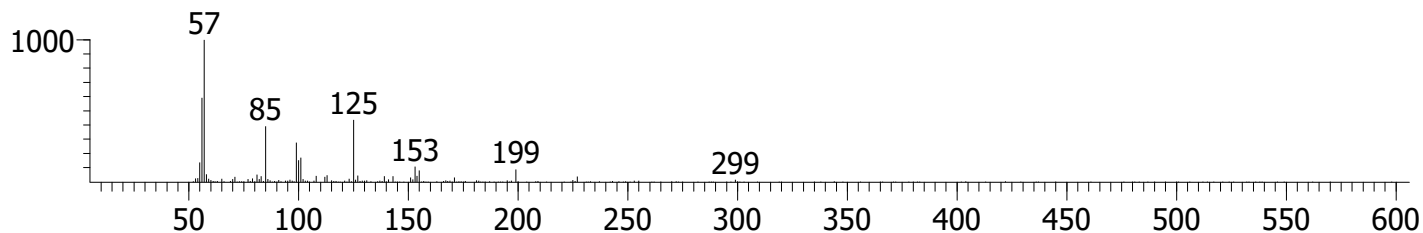

Peak True - sample "AerMBR A 092319 (20191119):1", peak 3191, at 2134.55 , 1.795 sec , sec (Spec # 2509 62)

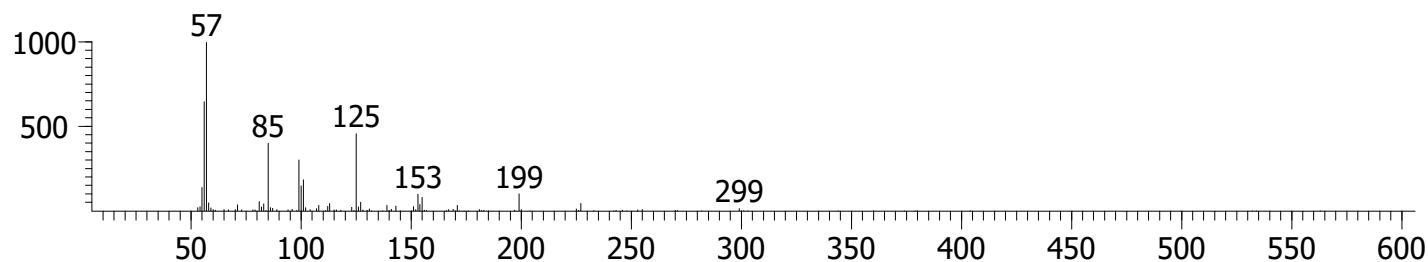

Library Hit - similarity 850, "Ethanol, 2-butoxy-, phosphate (3:1)"

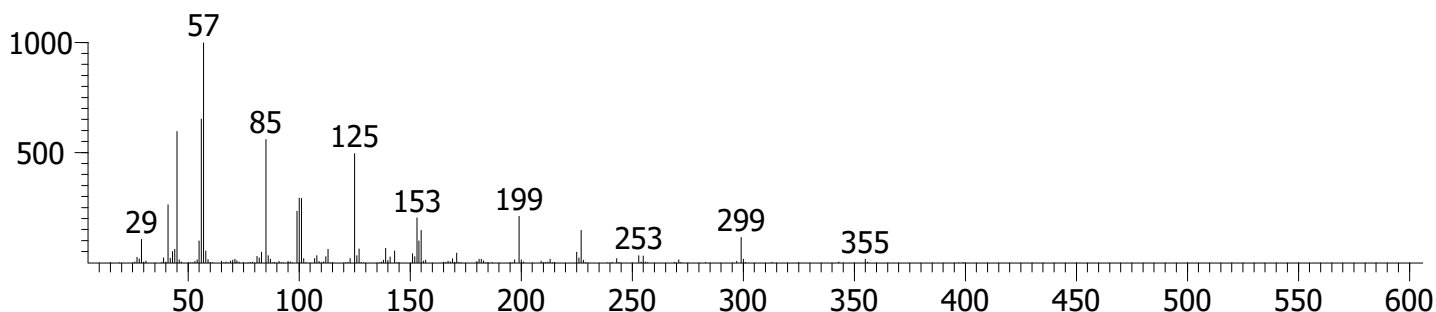

| Hit | Name                                | Similarity | Probability | CAS        | Library | Formula   | Weight |
|-----|-------------------------------------|------------|-------------|------------|---------|-----------|--------|
| 1   | Ethanol, 2-butoxy-, phosphate (3:1) | 850        | 9332        | 78-51-3    | mainlib | C18H39O7P | 398    |
| 2   | 2,2,7,7-Tetramethyloctane           | 592        | 93          | 1071-31-4  | mainlib | C12H26    | 170    |
| 3   | Butyl lactate                       | 591        | 89          | 138-22-7   | mainlib | C7H14O3   | 146    |
| 4   | Heptane, 2,2,4,6,6-pentamethyl-     | 590        | 86          | 13475-82-6 | mainlib | C12H26    | 170    |
| 5   | Hexane, 2-methyl-                   | 583        | 66          | 591-76-4   | mainlib | C7H16     | 100    |

## Carbamazepine

1st Dimension R.T. = 2134.55  
2nd Dimension R.T. = 3.247  
Quant Mass(es) = 193  
S/N = 210.33  
Area = 53165  
Height = 3873.5  
Similarity = 881

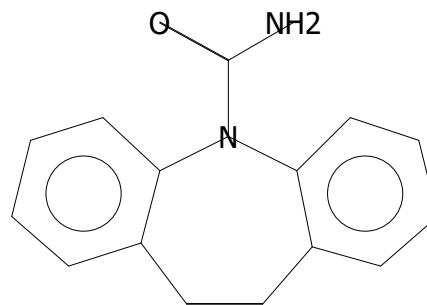

Peak Apex - sample "AerMBR A 092319 (20191119):1", peak 3193, at 2134.55 , 3.247 sec , sec (Spec # 251182)

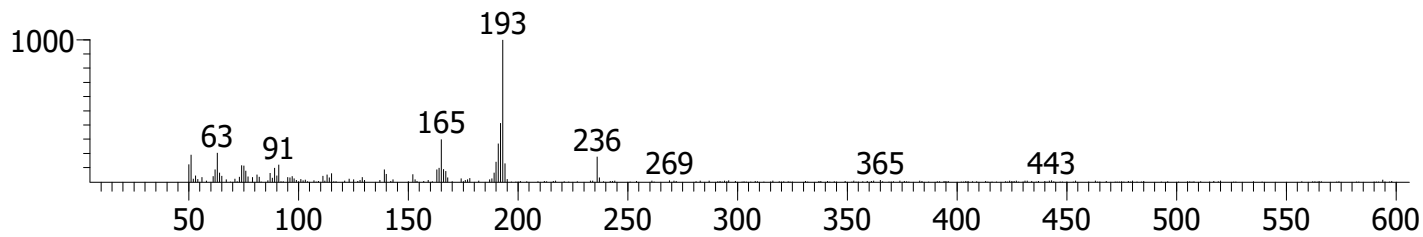

Peak True - sample "AerMBR A 092319 (20191119):1", peak 3193, at 2134.55 , 3.247 sec , sec (Spec # 251182)

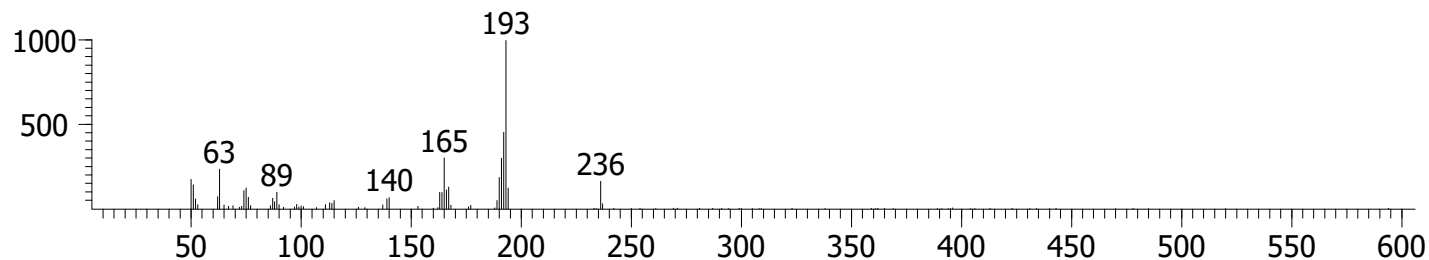

Library Hit - similarity 881, "Carbamazepine"

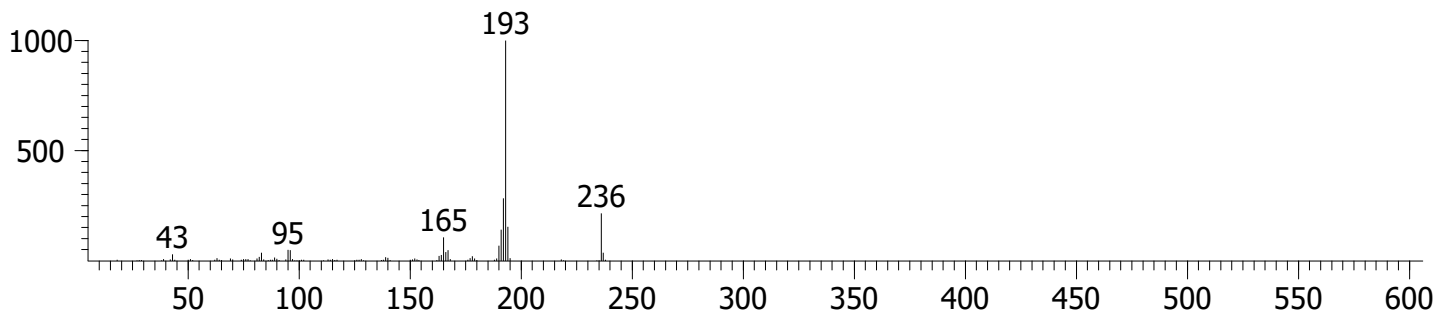

| Hit | Name                           | Similarity | Probability | CAS        | Library | Formula   | Weight |
|-----|--------------------------------|------------|-------------|------------|---------|-----------|--------|
| 1   | Carbamazepine                  | 881        | 4728        | 298-46-4   | mainlib | C15H12N2O | 236    |
| 2   | 5-Acetyl-5H-dibenz[b,f]azepine | 853        | 1365        | 19209-60-0 | mainlib | C16H13NO  | 235    |
| 3   | 3-Methyl-acridine              | 844        | 991         | 4740-12-9  | mainlib | C14H11N   | 193    |
| 4   | 2-Phenylindolizine             | 837        | 759         | 25379-20-8 | mainlib | C14H11N   | 193    |
| 5   | Iminostilbene                  | 827        | 536         | 256-96-2   | mainlib | C14H11N   | 193    |

## Triphenyl phosphate

1st Dimension R.T. = 2148.55

2nd Dimension R.T. = 2.627

Quant Mass(es) = 326

S/N = 65.888

Area = 4181.2

Height = 373.64

Similarity = 662

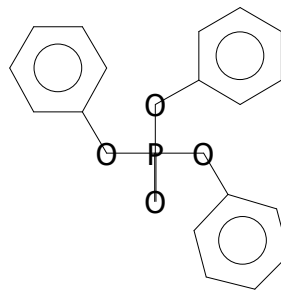

Peak Apex - sample "AerMBR A 092319 (20191119):1", peak 3209, at 2148.55 , 2.627 sec , sec (Spec # 2532 08)

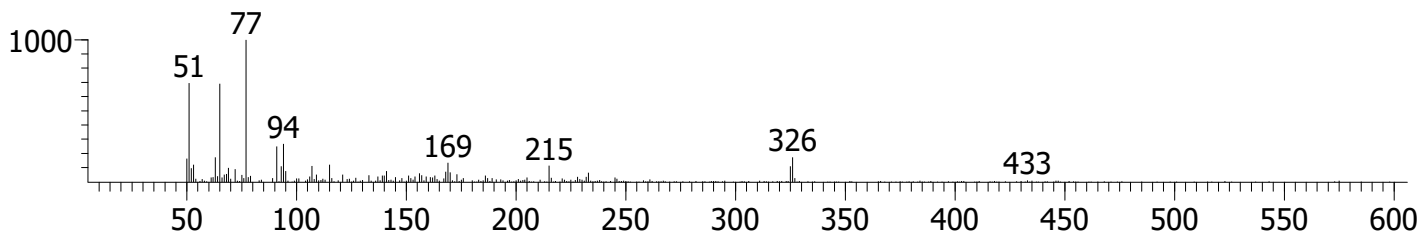

Peak True - sample "AerMBR A 092319 (20191119):1", peak 3209, at 2148.55 , 2.627 sec , sec (Spec # 2532 08)

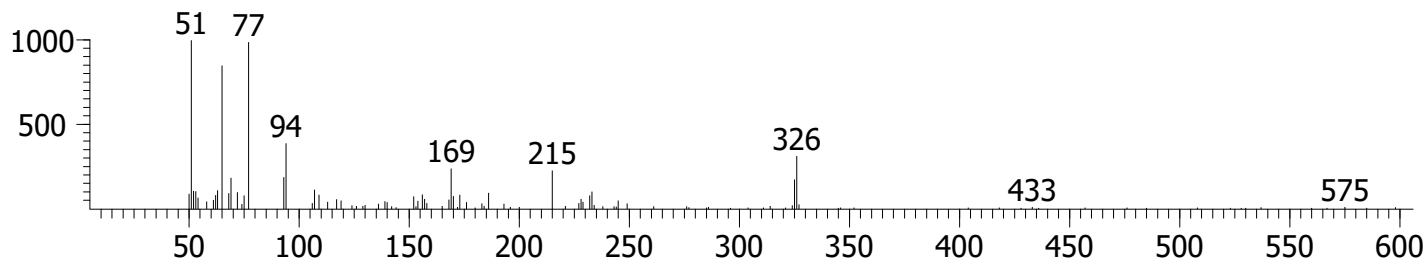

Library Hit - similarity 662, "Triphenyl phosphate"

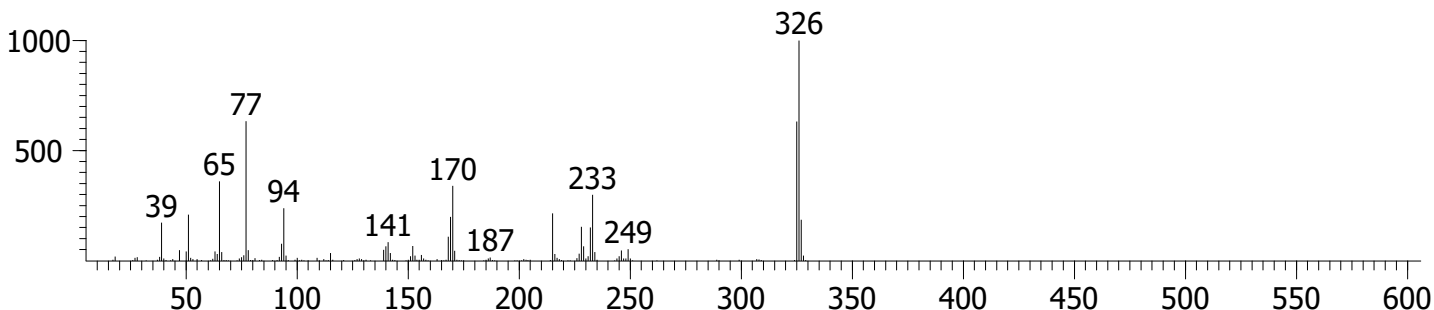

| Hit | Name                                                                   | Similarity | Probability | CAS         | Library | Formula      | Weight |
|-----|------------------------------------------------------------------------|------------|-------------|-------------|---------|--------------|--------|
| 1   | Triphenyl phosphate                                                    | 662        | 8754        | 115-86-6    | mainlib | C18H15O4P    | 326    |
| 2   | 2-[(4-Fluorophenyl)carbonyl]-5H,6H,7H,8H-thieno[2,3-b]quinolin-3-amine | 485        | 168         | 0-00-0      | mainlib | C18H15FN2OS  | 326    |
| 3   | Metaraminol                                                            | 484        | 161         | 54-49-9     | mainlib | C9H13NO2     | 167    |
| 4   | Pyridazine-3,4,5(2H)-trione, 6-(4-chlorophenyl)-, 5-phenylhydrazone    | 480        | 136         | 299921-97-4 | mainlib | C16H11ClN4O2 | 326    |
| 5   | Phosphinic acid, di(phenoxymethyl)-                                    | 472        | 101         | 21993-10-2  | mainlib | C14H15O4P    | 278    |

# Phenytoin

1st Dimension R.T. = 2148.55  
 2nd Dimension R.T. = 3.003  
 Quant Mass(es) = 180  
 S/N = 254.08  
 Area = 40958  
 Height = 2952.5  
 Similarity = 859

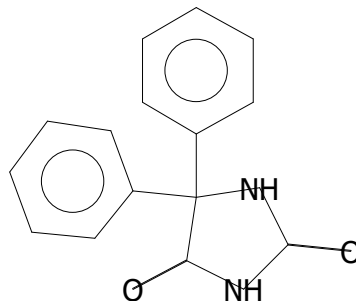

Peak Apex - sample "AerMBR A 092319 (20191119):1", peak 3210, at 2148.55 , 3.003 sec , sec (Spec # 2532 65)

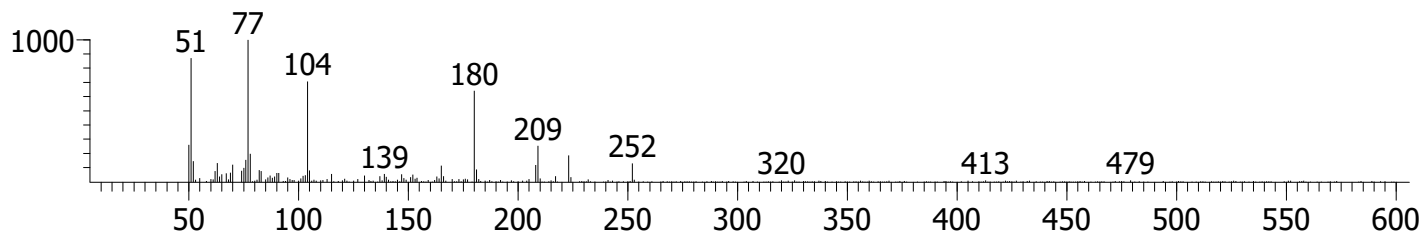

Peak True - sample "AerMBR A 092319 (20191119):1", peak 3210, at 2148.55 , 3.003 sec , sec (Spec # 2532 65)

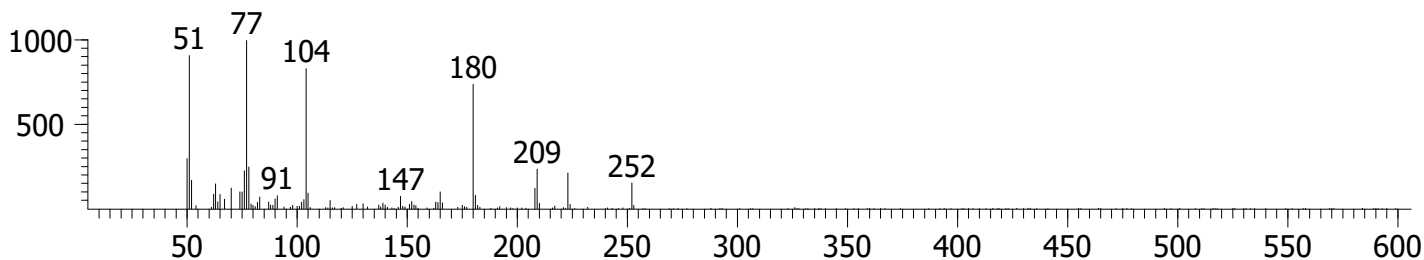

Library Hit - similarity 859, "Phenytoin"

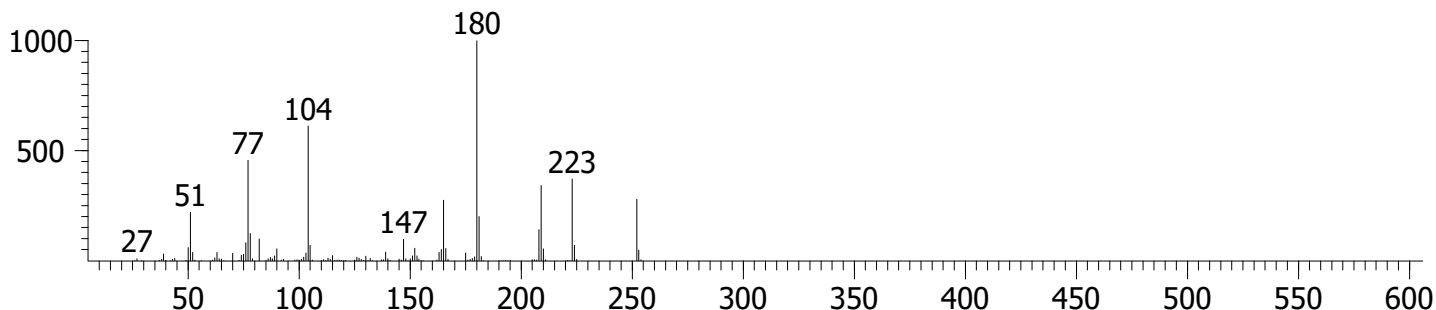

| Hit | Name                                                                                                                                            | Similarity | Probability | CAS        | Library | Formula      | Weight |
|-----|-------------------------------------------------------------------------------------------------------------------------------------------------|------------|-------------|------------|---------|--------------|--------|
| 1   | Phenytoin                                                                                                                                       | 859        | 9319        | 57-41-0    | mainlib | C15H12N2O2   | 252    |
| 2   | Methyl 8-((2-(N-(4-amino-2-methyl-5,6-dihydro-5-pyrimidinylmethyl)-N-formylamino)-1-(2-hydroxyethyl)-1-propenyl)dithio)-6-(acetylthio)octanoate | 734        | 419         | 0-00-0     | mainlib | C23H38N4O5S3 | 546    |
| 3   | Diphenylmethyleimine, N-acetyl-                                                                                                                 | 699        | 105         | 22800-71-1 | mainlib | C15H13NO     | 223    |
| 4   | 3-Benzyl-benzotriazin-4-one                                                                                                                     | 651        | 21          | 15561-72-5 | mainlib | C14H11N3O    | 237    |
| 5   | 5,5-Diphenylhydantoin, 3-trifluoroacetyl-                                                                                                       | 650        | 20          | 0-00-0     | mainlib | C17H11F3N2O3 | 348    |

# Triethylene glycol di(2-ethylhexoate)

1st Dimension R.T. = 2183.53

2nd Dimension R.T. = 1.657

Quant Mass(es) = 171

S/N = 79.629

Area = 5019.2

Height = 615.89

Similarity = 819

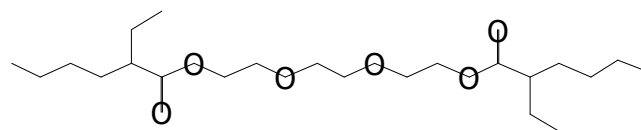

Peak Apex - sample "AerMBR A 092319 (20191119):1", peak 3255, at 2183.53 , 1.657 sec , sec (Spec # 2583 61)

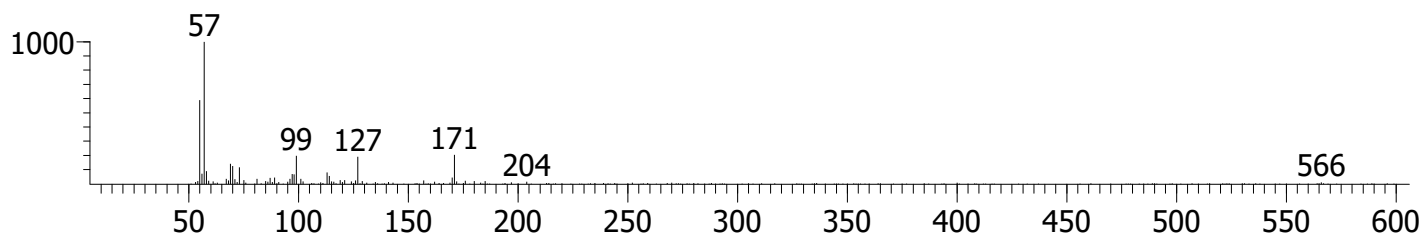

Peak True - sample "AerMBR A 092319 (20191119):1", peak 3255, at 2183.53 , 1.657 sec , sec (Spec # 2583 61)

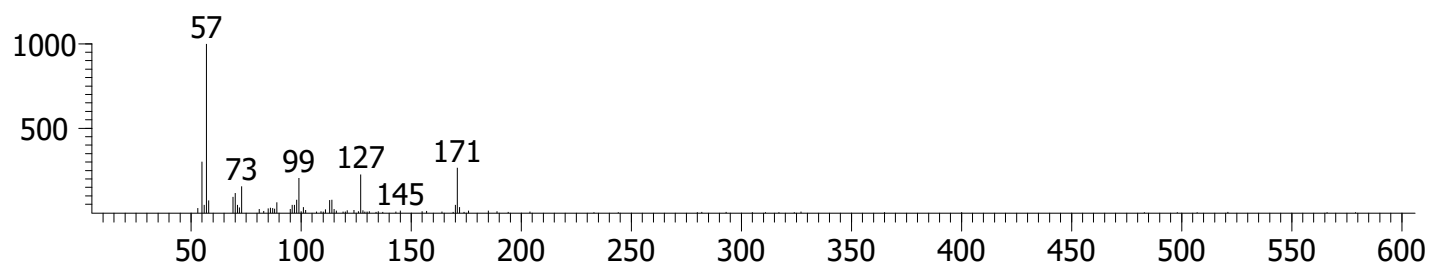

Library Hit - similarity 819, "Triethylene glycol di(2-ethylhexoate)"

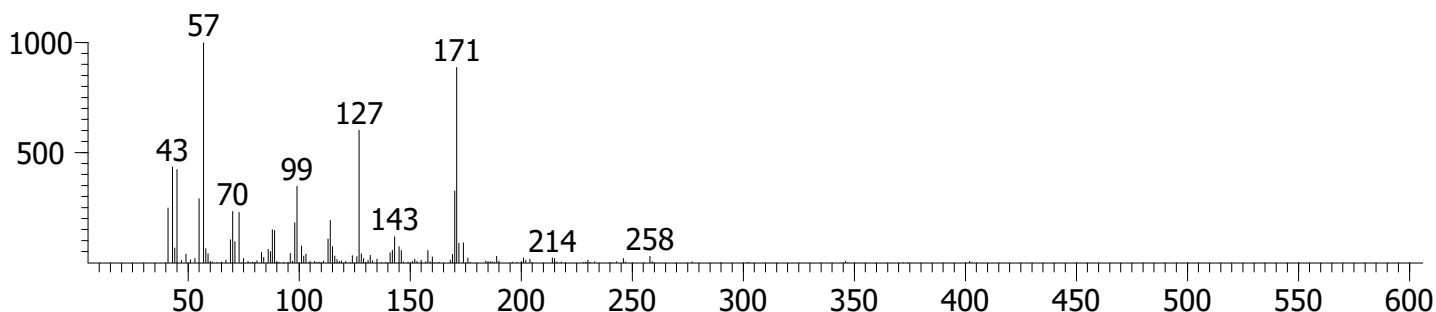

| Hit | Name                                                                   | Similarity | Probability | CAS        | Library | Formula  | Weight |
|-----|------------------------------------------------------------------------|------------|-------------|------------|---------|----------|--------|
| 1   | Triethylene glycol di(2-ethylhexoate)                                  | 819        | 8294        | 94-28-0    | mainlib | C22H42O6 | 402    |
| 2   | Hexanoic acid, 2-ethyl-, oxybis(2,1-ethanedioxy-2,1-ethanedioyl) ester | 746        | 1129        | 18268-70-7 | mainlib | C24H46O7 | 446    |
| 3   | 1-Hexanol, 2,2-dimethyl-                                               | 682        | 185         | 2370-13-0  | mainlib | C8H18O   | 130    |
| 4   | à-D-Glucopyranoside, methyl-2,3,4-tri-O-acetyl-6-O-heptyl-             | 653        | 52          | 0-00-0     | mainlib | C20H34O9 | 418    |
| 5   | 9,9-Dimethyl-1,4-dioxa-7-azaspiro[4.4]nonan-8-one                      | 651        | 48          | 0-00-0     | mainlib | C8H13NO3 | 171    |

## Tetrasulfide, dimethyl

1st Dimension R.T. = 906.756

2nd Dimension R.T. = 2.000

Quant Mass(es) = 158

S/N = 112.25

Area = 9846.2

Height = 1388.9

Similarity = 782

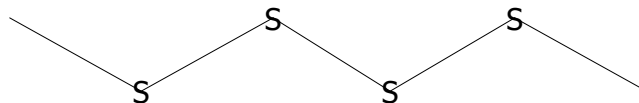

Peak Apex - sample "AerMBR B 091919 (20191119):1", peak 874, at 906.756 , 2.000 sec , sec (Spec # 64963 )

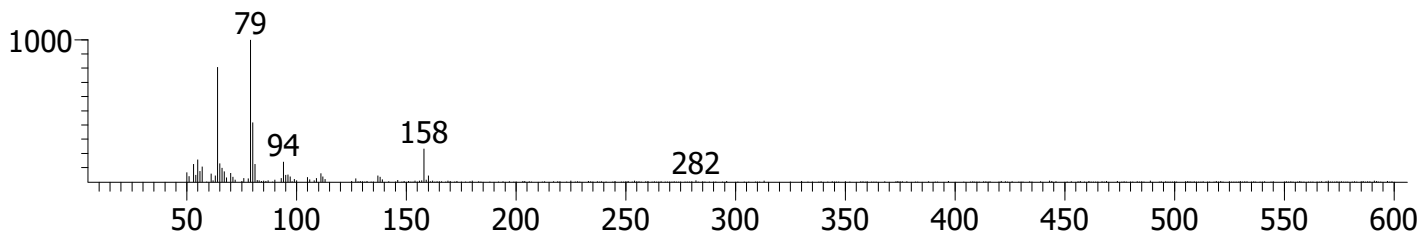

Peak True - sample "AerMBR B 091919 (20191119):1", peak 874, at 906.756 , 2.000 sec , sec (Spec # 64963)

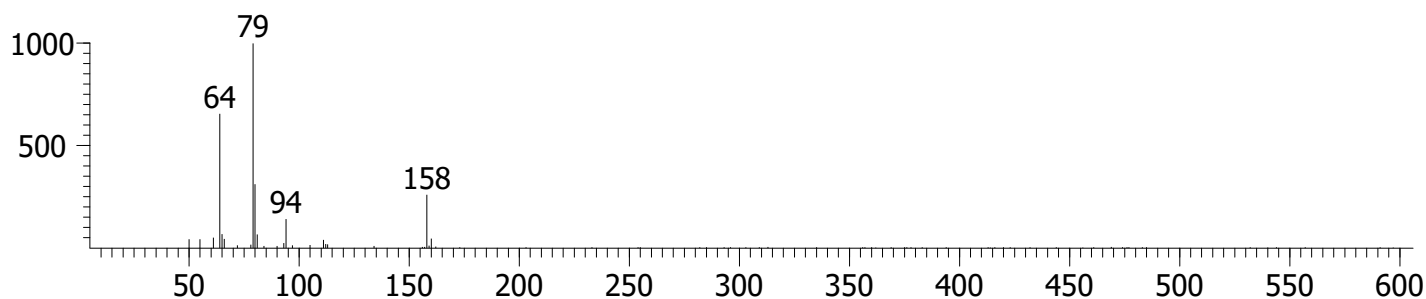

Library Hit - similarity 782, "Tetrasulfide, dimethyl"

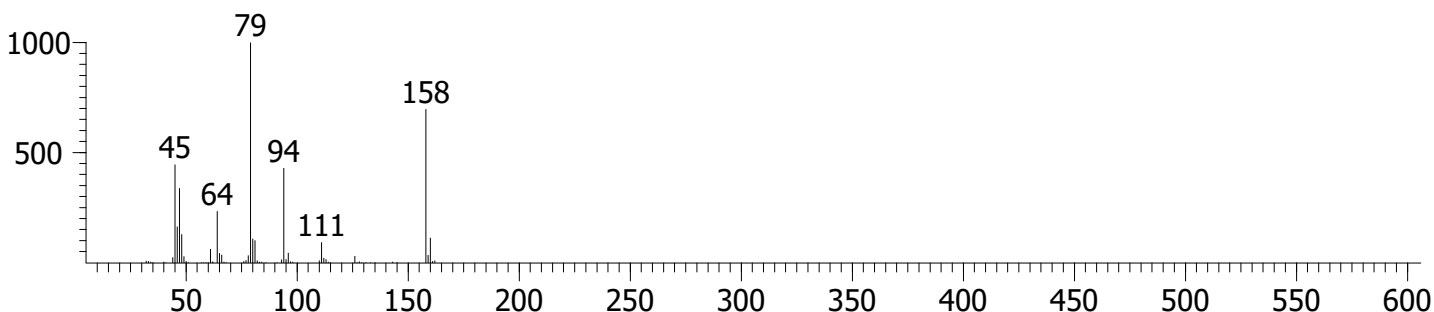

| Hit | Name                                          | Similarity | Probability | CAS        | Library | Formula                                                        | Weight |
|-----|-----------------------------------------------|------------|-------------|------------|---------|----------------------------------------------------------------|--------|
| 1   | Tetrasulfide, dimethyl                        | 782        | 8203        | 5756-24-1  | mainlib | C <sub>2</sub> H <sub>6</sub> S <sub>4</sub>                   | 158    |
| 2   | Pentasulfide, dimethyl                        | 731        | 1653        | 7330-31-6  | mainlib | C <sub>2</sub> H <sub>6</sub> S <sub>5</sub>                   | 190    |
| 3   | 1,2-Ethanediol dimethanesulphonate            | 583        | 47          | 4672-49-5  | mainlib | C <sub>4</sub> H <sub>10</sub> O <sub>6</sub> S <sub>2</sub>   | 218    |
| 4   | N-Chloro-N,O-bis(methylsulfonyl)hydroxylamine | 545        | 11          | 96733-44-7 | mainlib | C <sub>2</sub> H <sub>6</sub> ClNO <sub>5</sub> S <sub>2</sub> | 223    |
| 5   | N,O-Bis(methylsulfonyl)hydroxylamine          | 543        | 10          | 96088-56-1 | mainlib | C <sub>2</sub> H <sub>7</sub> NO <sub>5</sub> S <sub>2</sub>   | 189    |

## t-Butylhydroquinone

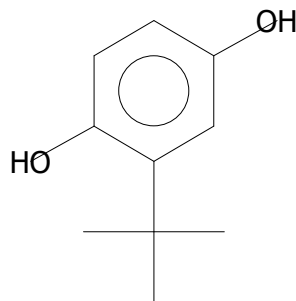

1st Dimension R.T. = 1333.51

2nd Dimension R.T. = 1.987

Quant Mass(es) = 151

S/N = 915.27

Area = 151016

Height = 15806

Similarity = 867

Peak Apex - sample "AerMBR B 091919 (20191119):1", peak 2024, at 1333.51 , 1.987 sec , sec (Spec # 1296 21)

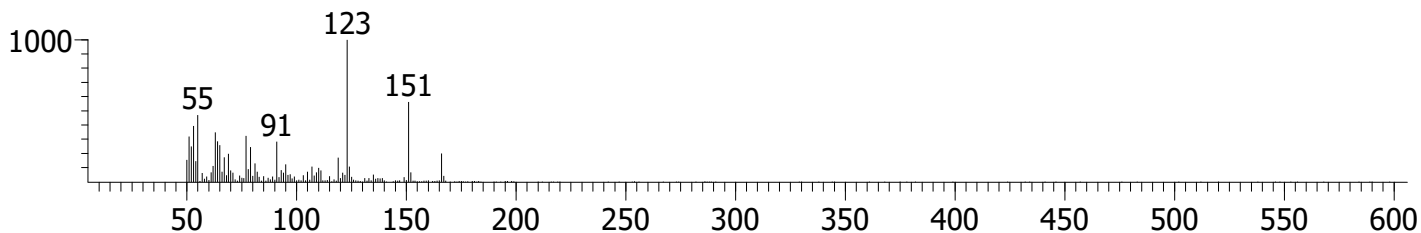

Peak True - sample "AerMBR B 091919 (20191119):1", peak 2024, at 1333.51 , 1.987 sec , sec (Spec # 1296 21)

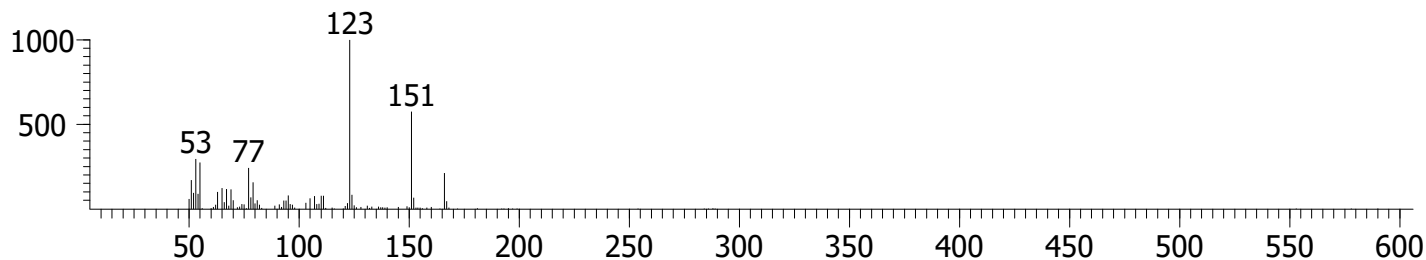

Library Hit - similarity 867, "t-Butylhydroquinone"

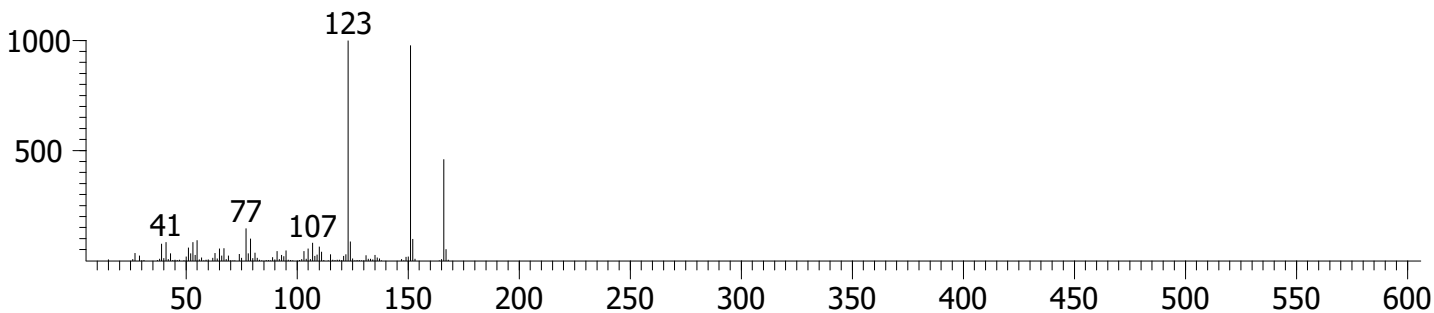

| Hit | Name                                             | Similarity | Probability | CAS        | Library | Formula  | Weight |
|-----|--------------------------------------------------|------------|-------------|------------|---------|----------|--------|
| 1   | t-Butylhydroquinone                              | 867        | 8115        | 1948-33-0  | mainlib | C10H14O2 | 166    |
| 2   | Ethanone, 1-(2,6,6-trimethyl-1-cyclohexen-1-yl)- | 759        | 532         | 1197-92-8  | mainlib | C11H18O  | 166    |
| 3   | 5-Hepten-3-yn-2-ol, 6-methyl-5-(1-methylethyl)-  | 739        | 242         | 63922-41-8 | mainlib | C11H18O  | 166    |
| 4   | 7a-Methyl-3-methylenehexahydrobenzofuran-2-one   | 729        | 171         | 67498-53-7 | mainlib | C10H14O2 | 166    |
| 5   | p-tert.-Butylcatechol                            | 723        | 134         | 98-29-3    | mainlib | C10H14O2 | 166    |



# Phenol, 2,4,6-tribromo-

1st Dimension R.T. = 1445.45  
2nd Dimension R.T. = 2.125  
Quant Mass(es) = 332  
S/N = 66.712  
Area = 5788.8  
Height = 694.87  
Similarity = 668

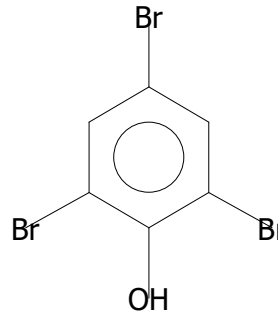

Peak Apex - sample "AerMBR B 091919 (20191119):1", peak 2347, at 1445.45 , 2.125 sec , sec (Spec # 1466 02)

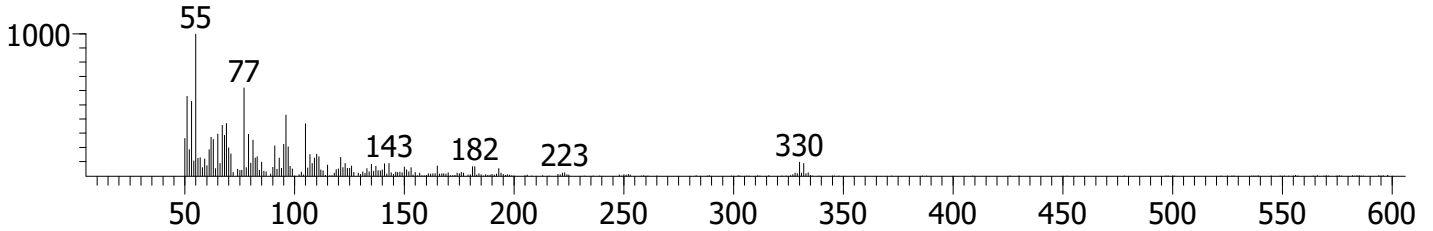

Peak True - sample "AerMBR B 091919 (20191119):1", peak 2347, at 1445.45 , 2.125 sec , sec (Spec # 1466 02)

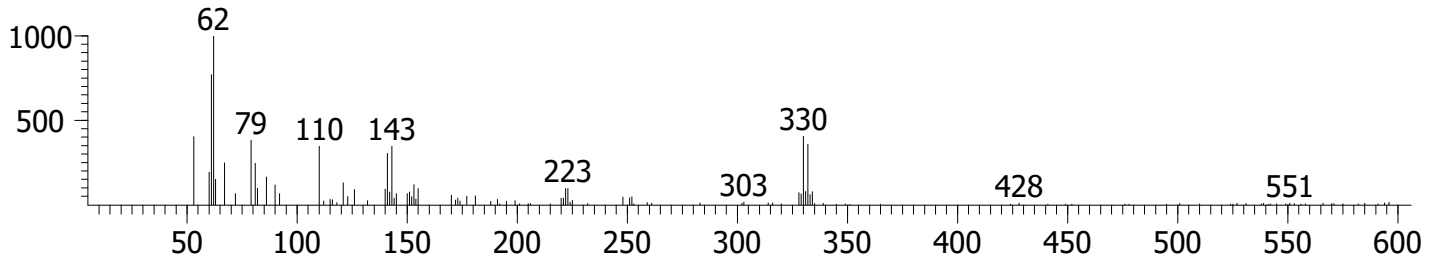

Library Hit - similarity 668, "Phenol, 2,4,6-tribromo-"

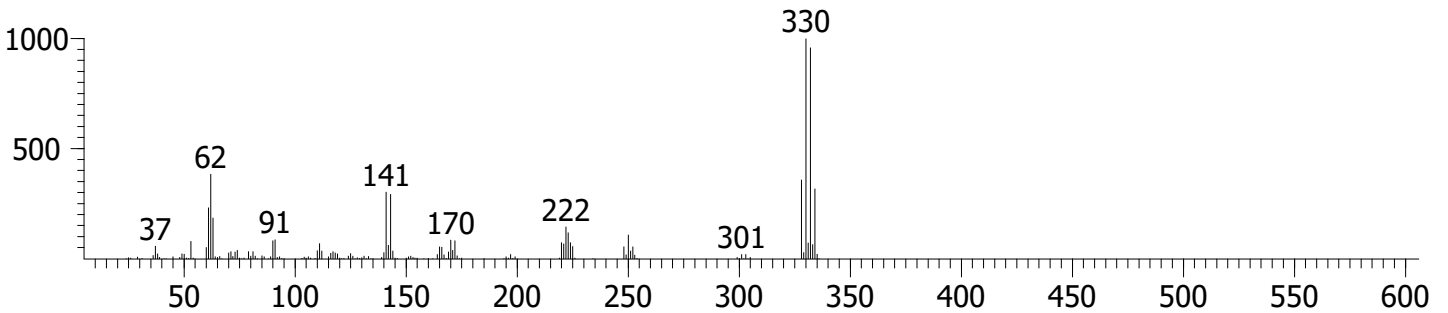

| Hit | Name                          | Similarity | Probability | CAS         | Library | Formula   | Weight |
|-----|-------------------------------|------------|-------------|-------------|---------|-----------|--------|
| 1   | Phenol, 2,4,6-tribromo-       | 668        | 3601        | 118-79-6    | mainlib | C6H3Br3O  | 328    |
| 2   | 2,4,5-Tribromophenol, acetate | 645        | 1315        | 0-00-0      | mainlib | C8H5Br3O2 | 370    |
| 3   | 2,3,4-Tribromophenol, acetate | 641        | 1111        | 0-00-0      | mainlib | C8H5Br3O2 | 370    |
| 4   | 2,4,5-Tribromophenol          | 635        | 873         | 14401-61-7  | mainlib | C6H3Br3O  | 328    |
| 5   | 2,3,4-Tribromophenol          | 625        | 616         | 138507-65-0 | mainlib | C6H3Br3O  | 328    |

## Theobromine

1st Dimension R.T. = 1690.31  
 2nd Dimension R.T. = 2.812  
 Quant Mass(es) = 180  
 S/N = 51.210  
 Area = 5017.4  
 Height = 402.48  
 Similarity = 596

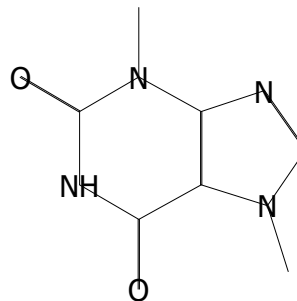

Peak Apex - sample "AerMBR B 091919 (20191119):1", peak 3096, at 1690.31 , 2.812 sec , sec (Spec # 1838 06)

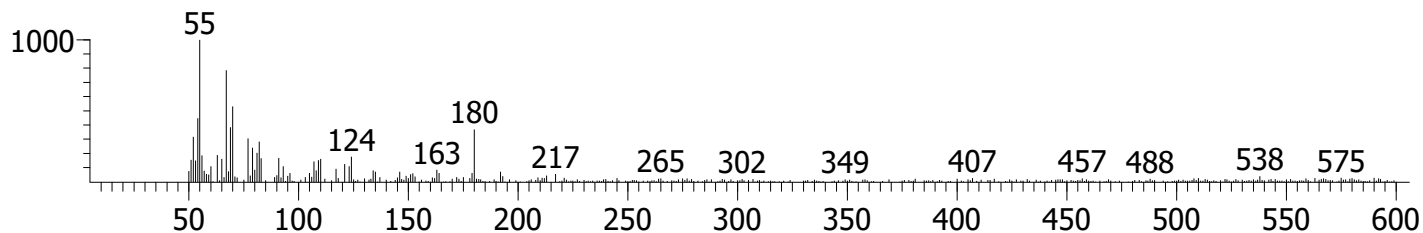

Peak True - sample "AerMBR B 091919 (20191119):1", peak 3096, at 1690.31 , 2.812 sec , sec (Spec # 1838 06)

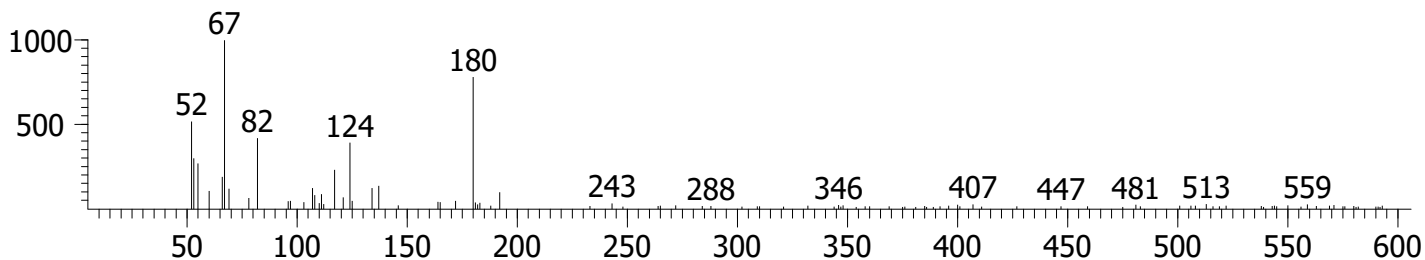

Library Hit - similarity 596, "Theobromine"

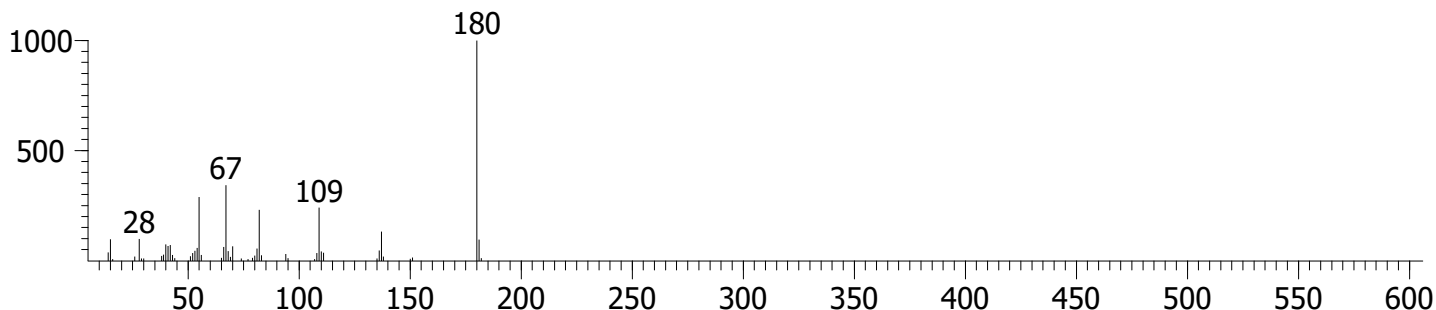

| Hit | Name                                                           | Similarity | Probability | CAS        | Library | Formula     | Weight |
|-----|----------------------------------------------------------------|------------|-------------|------------|---------|-------------|--------|
| 1   | Theobromine                                                    | 596        | 3827        | 83-67-0    | mainlib | C7H8N4O2    | 180    |
| 2   | Purine-2,6(1H,3H)-dione, 1-(2-ethenylxyethyl)-3,7-dimethyl-    | 533        | 641         | 0-00-0     | mainlib | C11H14N4O3  | 250    |
| 3   | 2-Piperidinecarboxylic acid, 1-(trifluoroacetyl)-, butyl ester | 528        | 517         | 54965-28-5 | mainlib | C12H18F3NO3 | 281    |
| 4   | Diethylboryl-ε-capryllactam                                    | 526        | 476         | 0-00-0     | mainlib | C12H24BNO   | 209    |
| 5   | (2S,4aS,5R,8aR)-2,5-Dipropyldecahydroquinoline                 | 521        | 384         | 68365-90-2 | mainlib | C15H29N     | 223    |

# Benzene, 1-(2-butenyl)-2,3-dimethyl-

1st Dimension R.T. = 1704.3  
2nd Dimension R.T. = 1.597  
Quant Mass(es) = 145  
S/N = 297.62  
Area = 76849  
Height = 7063.5  
Similarity = 726

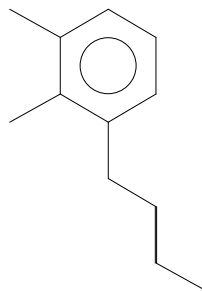

Peak Apex - sample "AerMBR B 091919 (20191119):1", peak 3133, at 1704.3 , 1.597 sec , sec (Spec # 18574 2)

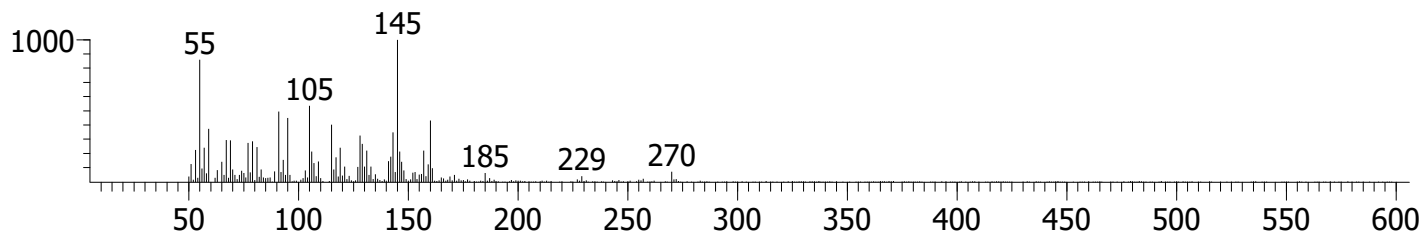

Peak True - sample "AerMBR B 091919 (20191119):1", peak 3133, at 1704.3 , 1.597 sec , sec (Spec # 18574 2)

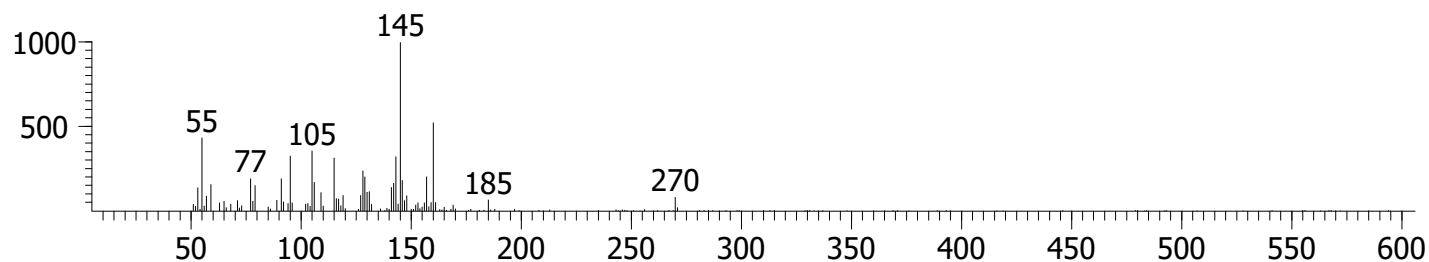

Library Hit - similarity 726, "Benzene, 1-(2-butenyl)-2,3-dimethyl-"

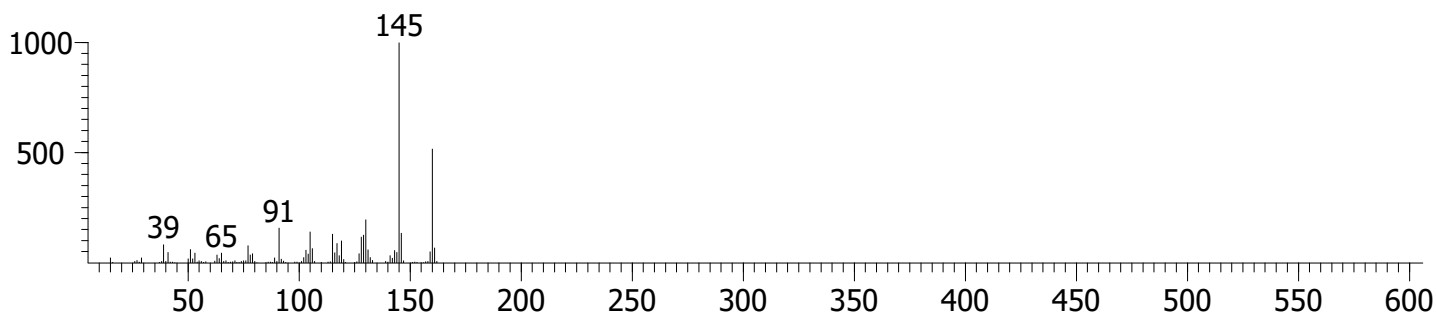

| Hit | Name                                          | Similarity | Probability | CAS        | Library | Formula | Weight |
|-----|-----------------------------------------------|------------|-------------|------------|---------|---------|--------|
| 1   | Benzene, 1-(2-butenyl)-2,3-dimethyl-          | 726        | 1925        | 54340-85-1 | mainlib | C12H16  | 160    |
| 2   | Benzene, 4-(2-butenyl)-1,2-dimethyl-, (E)-    | 717        | 1397        | 54340-86-2 | mainlib | C12H16  | 160    |
| 3   | Naphthalene, 1,2,3,4-tetrahydro-6,7-dimethyl- | 708        | 1014        | 1076-61-5  | mainlib | C12H16  | 160    |
| 4   | Benzene, 1,2,4-trimethyl-5-(1-methylethenyl)- | 696        | 675         | 54340-84-0 | mainlib | C12H16  | 160    |
| 5   | Benzene, 1,3,5-trimethyl-2-(1-methylethenyl)- | 694        | 623         | 14679-13-1 | mainlib | C12H16  | 160    |

## 10,18-Bisnorabieta-8,11,13-triene

1st Dimension R.T. = 1753.27  
2nd Dimension R.T. = 1.676  
Quant Mass(es) = 227  
S/N = 126.60  
Area = 7234.0  
Height = 817.73  
Similarity = 684

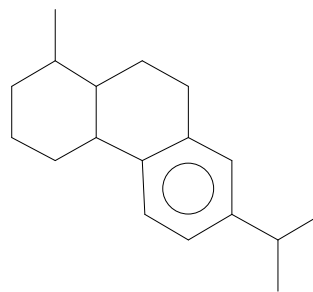

Peak Apex - sample "AerMBR B 091919 (20191119):1", peak 3308, at 1753.27 , 1.676 sec , sec (Spec # 193174)

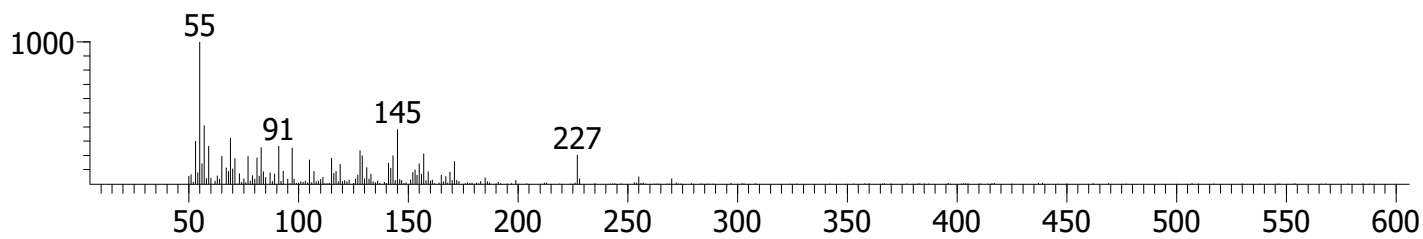

Peak True - sample "AerMBR B 091919 (20191119):1", peak 3308, at 1753.27 , 1.676 sec , sec (Spec # 193174)

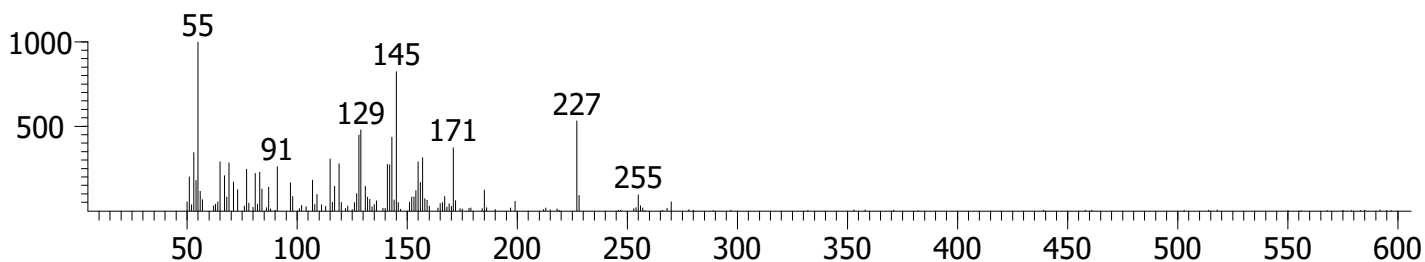

Library Hit - similarity 684, "10,18-Bisnorabieta-8,11,13-triene"

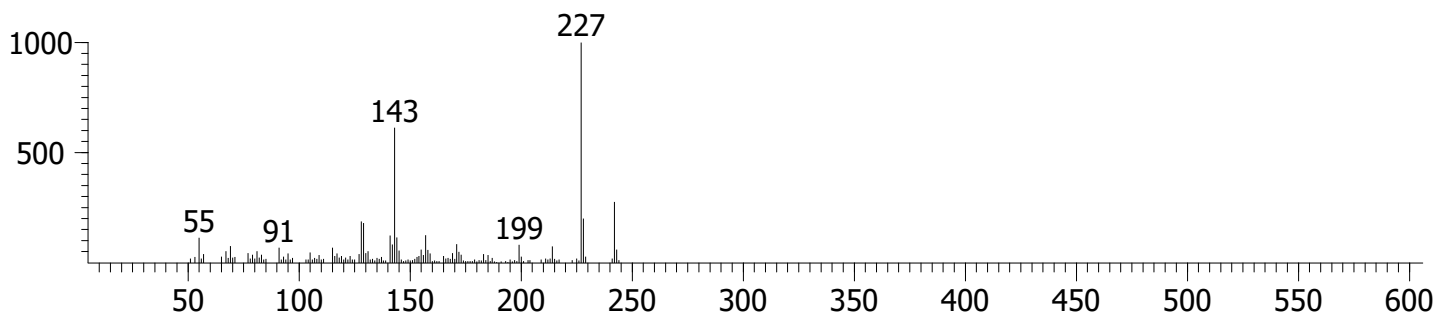

| Hit | Name                                           | Similarity | Probability | CAS        | Library | Formula  | Weight |
|-----|------------------------------------------------|------------|-------------|------------|---------|----------|--------|
| 1   | 10,18-Bisnorabieta-8,11,13-triene              | 684        | 4450        | 32624-67-2 | mainlib | C18H26   | 242    |
| 2   | Benzene, 1,3,5-tris(3-methyl-3-butenyl)-       | 657        | 1309        | 55124-94-2 | mainlib | C21H30   | 282    |
| 3   | 5,8,11-Eicosatriynoic acid, methyl ester       | 645        | 872         | 0-00-0     | mainlib | C21H30O2 | 314    |
| 4   | 5-Pentyl-2-phenylcyclohex-1-ene-1-carbaldehyde | 634        | 598         | 0-00-0     | mainlib | C18H24O  | 256    |
| 5   | 5,8,11-Heptadecatriynoic acid, methyl ester    | 617        | 326         | 56554-57-5 | mainlib | C18H24O2 | 272    |

## Benzyl chloride

1st Dimension R.T. = 612.924

2nd Dimension R.T. = 1.637

Quant Mass(es) = 91

S/N = 1939.3

Area = 644388

Height = 94739

Similarity = 839

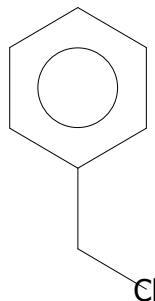

Peak Apex - sample "AnBxr B (20191121):1", peak 360, at 612.924 , 1.637 sec , sec (Spec # 20388)

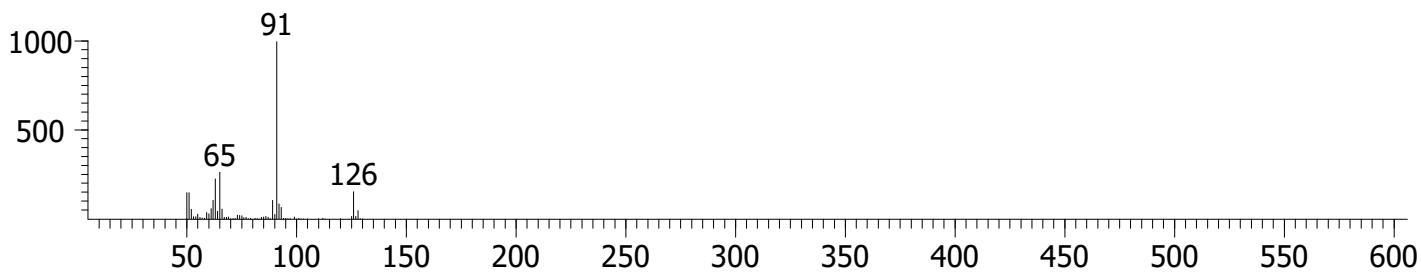

Peak True - sample "AnBxr B (20191121):1", peak 360, at 612.924 , 1.637 sec , sec (Spec # 20388)

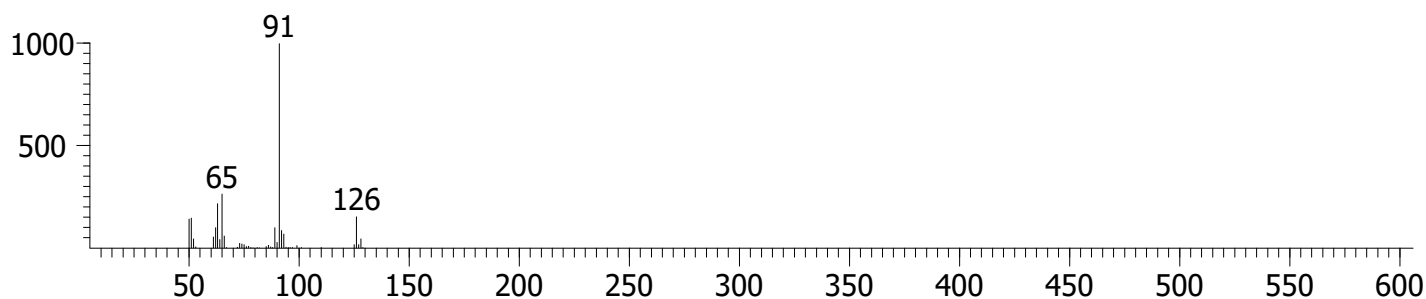

Library Hit - similarity 839, "Benzyl chloride"

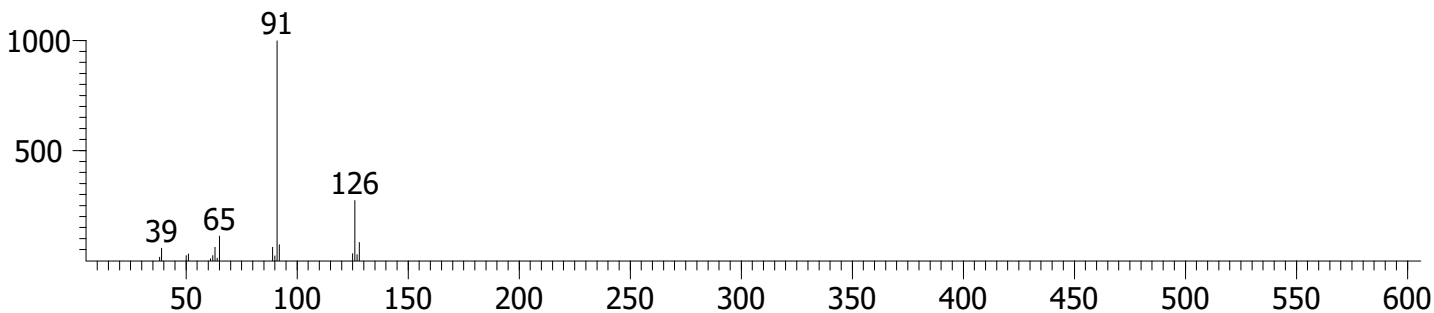

| Hit | Name                        | Similarity | Probability | CAS       | Library | Formula | Weight |
|-----|-----------------------------|------------|-------------|-----------|---------|---------|--------|
| 1   | Benzyl chloride             | 839        | 4023        | 100-44-7  | replib  | C7H7Cl  | 126    |
| 2   | Benzene, 1-chloro-3-methyl- | 798        | 918         | 108-41-8  | replib  | C7H7Cl  | 126    |
| 3   | 1,6-Heptadien-3-yne         | 794        | 809         | 5150-80-1 | mainlib | C7H8    | 92     |
| 4   | 1,6-Heptadien-3-yne         | 792        | 721         | 5150-80-1 | replib  | C7H8    | 92     |
| 5   | Benzyl chloride             | 789        | 4023        | 100-44-7  | replib  | C7H7Cl  | 126    |

## 1,2-Cyclopentanedione, 3-methyl-

1st Dimension R.T. = 630.414  
2nd Dimension R.T. = 1.729  
Quant Mass(es) = 112  
S/N = 2976.8  
Area = 417177  
Height = 55107  
Similarity = 963

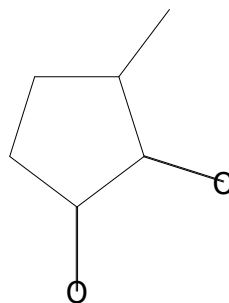

Peak Apex - sample "AnBxr B (20191121):1", peak 423, at 630.414 , 1.729 sec , sec (Spec # 23052)

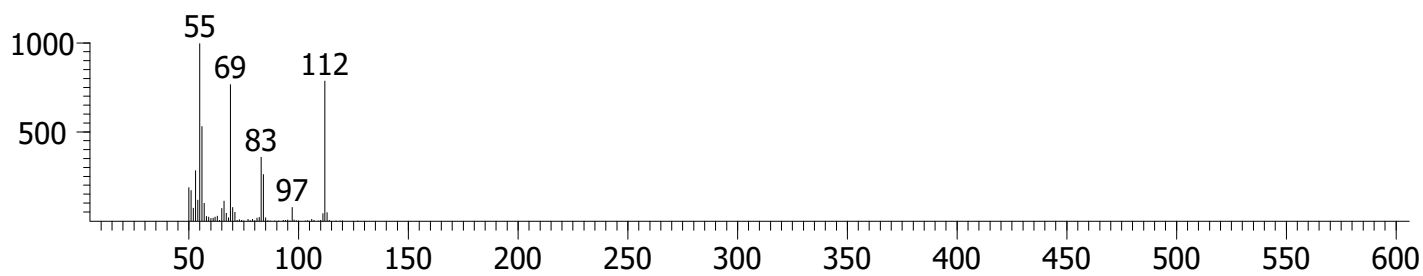

Peak True - sample "AnBxr B (20191121):1", peak 423, at 630.414 , 1.729 sec , sec (Spec # 23052)

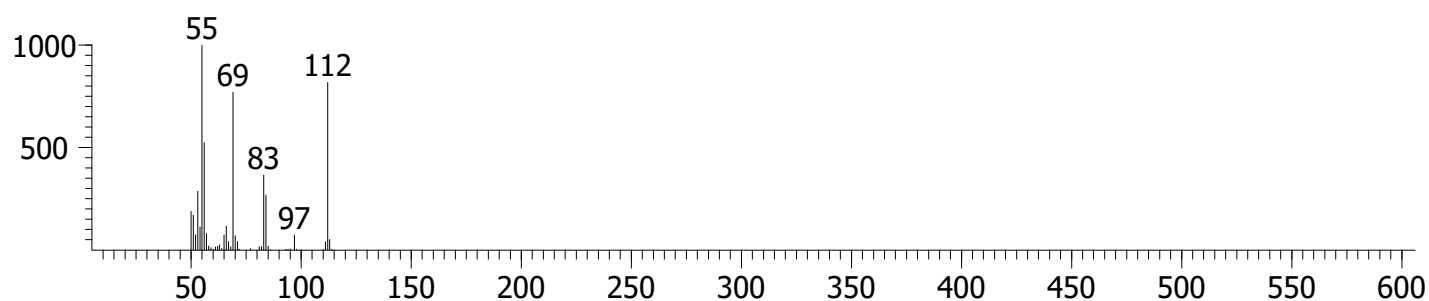

Library Hit - similarity 963, "1,2-Cyclopentanedione, 3-methyl-"

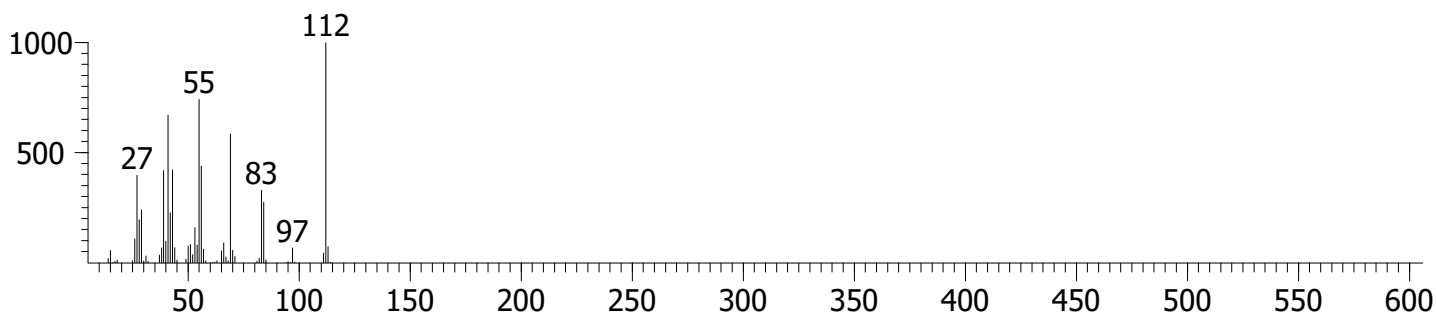

| Hit | Name                                     | Similarity | Probability | CAS      | Library | Formula | Weight |
|-----|------------------------------------------|------------|-------------|----------|---------|---------|--------|
| 1   | 1,2-Cyclopentanedione, 3-methyl-         | 963        | 8108        | 765-70-8 | mainlib | C6H8O2  | 112    |
| 2   | 1,2-Cyclopentanedione, 3-methyl-         | 959        | 7117        | 765-70-8 | replib  | C6H8O2  | 112    |
| 3   | 1,2-Cyclopentanedione, 3-methyl-         | 939        | 7117        | 765-70-8 | replib  | C6H8O2  | 112    |
| 4   | 2-Cyclopenten-1-one, 2-hydroxy-3-methyl- | 936        | 2599        | 80-71-7  | replib  | C6H8O2  | 112    |
| 5   | 1,2-Cyclopentanedione, 3-methyl-         | 911        | 7117        | 765-70-8 | replib  | C6H8O2  | 112    |

## 4-Amino-6-hydroxypyrimidine

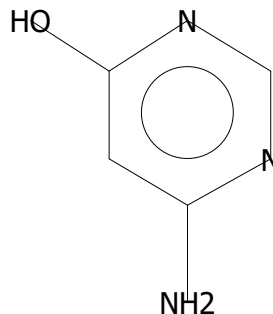

1st Dimension R.T. = 693.378

2nd Dimension R.T. = 1.921

Quant Mass(es) = 111

S/N = 854.72

Area = 212790

Height = 27570

Similarity = 736

Peak Apex - sample "AnBxr B (20191121):1", peak 599, at 693.378 , 1.921 sec , sec (Spec # 32621)

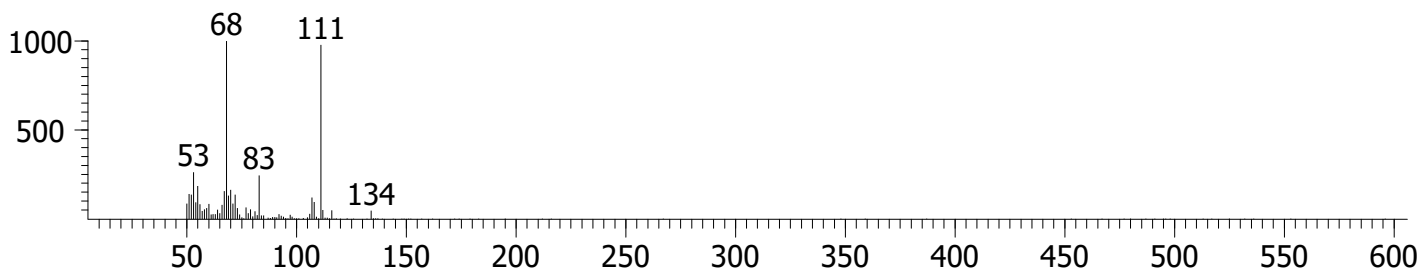

Peak True - sample "AnBxr B (20191121):1", peak 599, at 693.378 , 1.921 sec , sec (Spec # 32621)

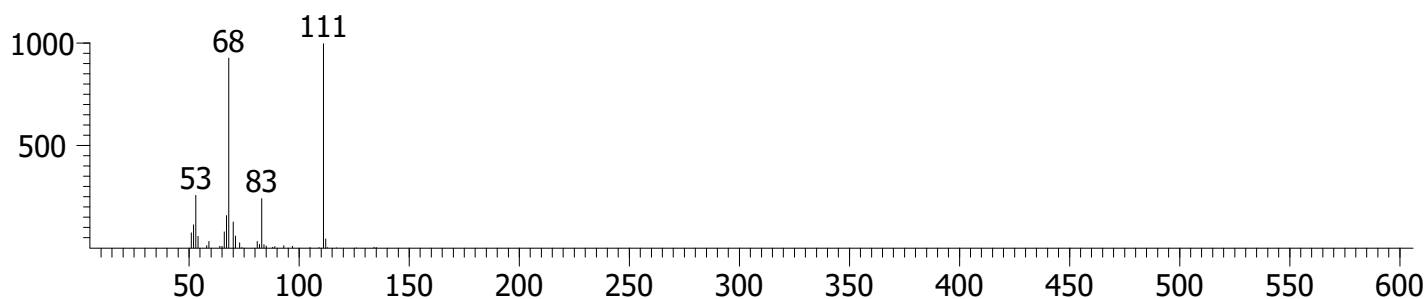

Library Hit - similarity 736, "4-Amino-6-hydroxypyrimidine"

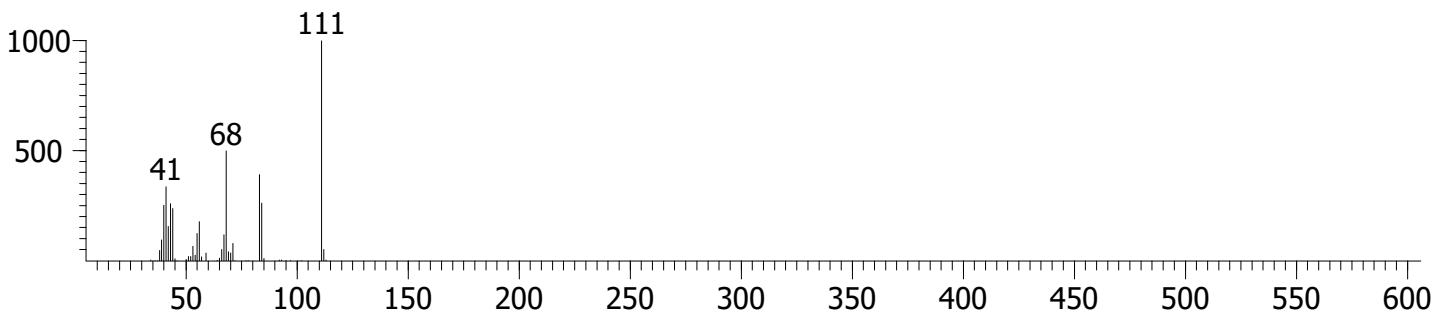

| Hit | Name                         | Similarity | Probability | CAS       | Library | Formula | Weight |
|-----|------------------------------|------------|-------------|-----------|---------|---------|--------|
| 1   | 4-Amino-6-hydroxypyrimidine  | 736        | 4293        | 1193-22-2 | replib  | C4H5N3O | 111    |
| 2   | 2(1H)-Pyridinone, 6-hydroxy- | 730        | 3375        | 626-06-2  | replib  | C5H5NO2 | 111    |
| 3   | Isocytosine                  | 723        | 4297        | 108-53-2  | mainlib | C4H5N3O | 111    |
| 4   | 4-Amino-6-hydroxypyrimidine  | 708        | 4293        | 1193-22-2 | replib  | C4H5N3O | 111    |
| 5   | 4-Amino-6-hydroxypyrimidine  | 700        | 1569        | 1193-22-2 | mainlib | C4H5N3O | 111    |

# Benzenemethanol, à,à-dimethyl-

1st Dimension R.T. = 710.868  
2nd Dimension R.T. = 1.663  
Quant Mass(es) = 121  
S/N = 6207.4  
Area = 1156130  
Height = 156902  
Similarity = 867

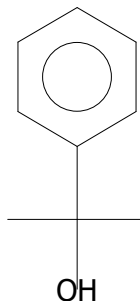

Peak Apex - sample "AnBxr B (20191121):1", peak 666, at 710.868 , 1.663 sec , sec (Spec # 35232)

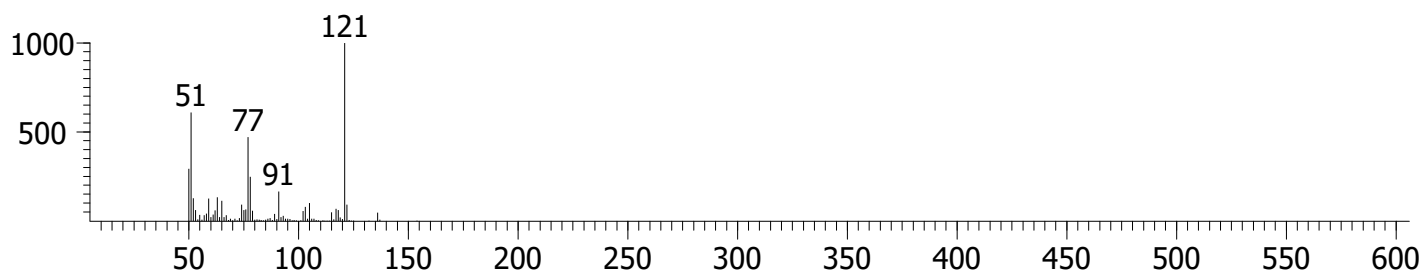

Peak True - sample "AnBxr B (20191121):1", peak 666, at 710.868 , 1.663 sec , sec (Spec # 35232)

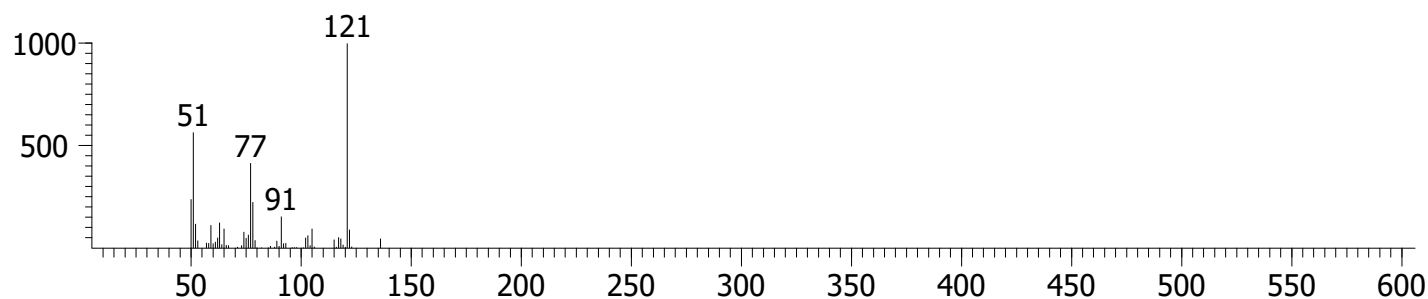

Library Hit - similarity 867, "Benzenemethanol, à,à-dimethyl-"

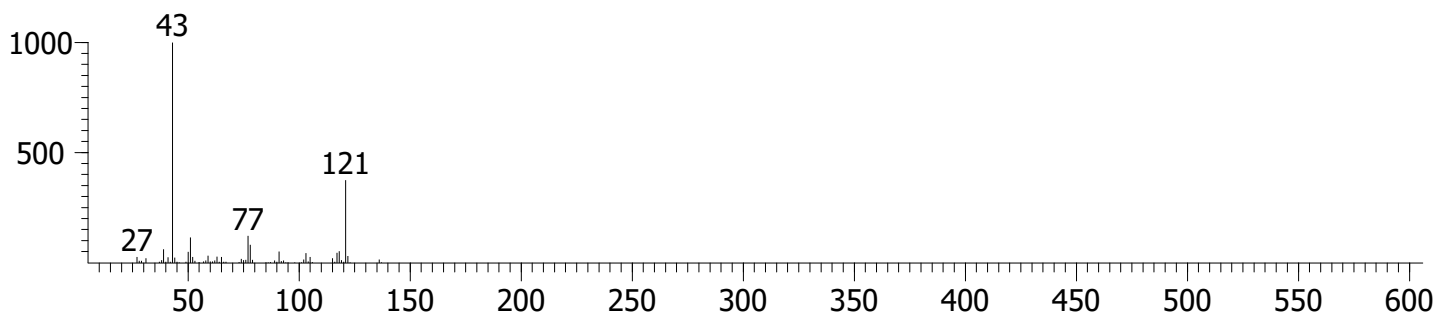

| Hit | Name                                                  | Similarity | Probability | CAS        | Library | Formula  | Weight |
|-----|-------------------------------------------------------|------------|-------------|------------|---------|----------|--------|
| 1   | Benzenemethanol, à,à-dimethyl-                        | 867        | 5475        | 617-94-7   | replib  | C9H12O   | 136    |
| 2   | Benzene, (1-methoxyethyl)-                            | 831        | 2021        | 4013-34-7  | mainlib | C9H12O   | 136    |
| 3   | Benzeneacetic acid, à-hydroxy-à-methyl-, methyl ester | 824        | 1548        | 20731-95-7 | mainlib | C10H12O3 | 180    |
| 4   | à-Ethyl-à-methylbenzyl alcohol                        | 821        | 1368        | 1565-75-9  | mainlib | C10H14O  | 150    |
| 5   | Atrolactic acid                                       | 820        | 1145        | 515-30-0   | replib  | C9H10O3  | 166    |



## 2-Acetyl-5-methylthiophene

1st Dimension R.T. = 882.27  
2nd Dimension R.T. = 1.921  
Quant Mass(es) = 125  
S/N = 784.78  
Area = 124920  
Height = 14811  
Similarity = 925

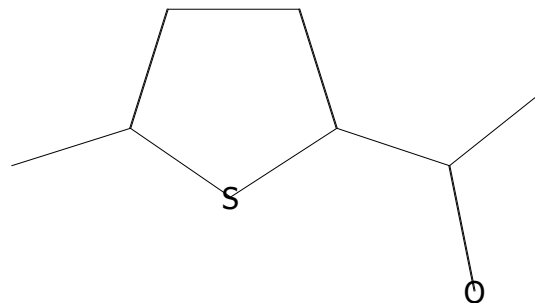

Peak Apex - sample "AnBxr B (20191121):1", peak 1393, at 882.27 , 1.921 sec , sec (Spec # 61241)

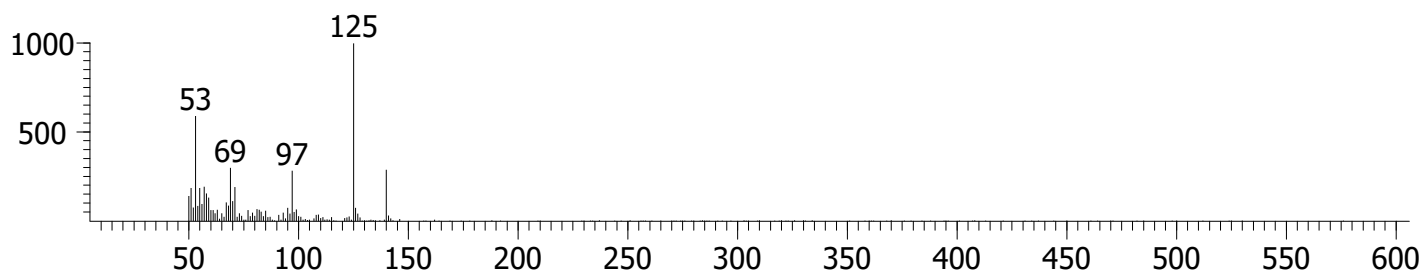

Peak True - sample "AnBxr B (20191121):1", peak 1393, at 882.27 , 1.921 sec , sec (Spec # 61241)

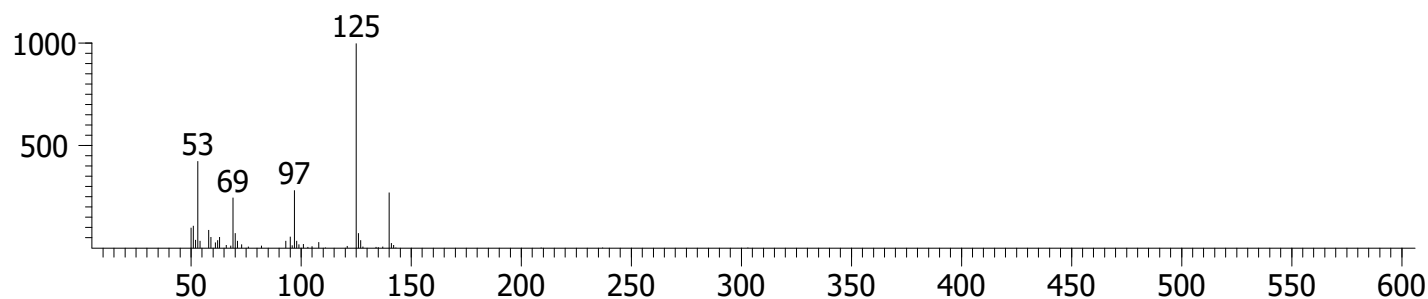

Library Hit - similarity 925, "2-Acetyl-5-methylthiophene"

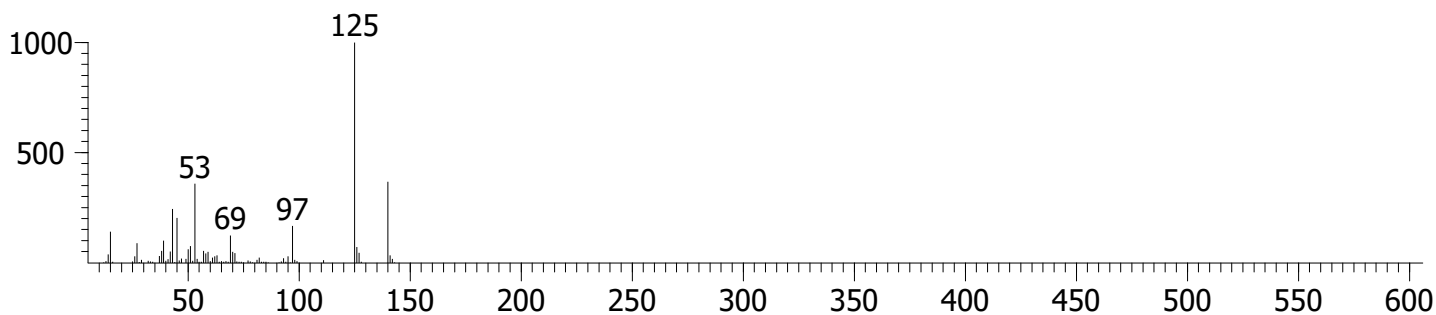

| Hit | Name                              | Similarity | Probability | CAS        | Library | Formula | Weight |
|-----|-----------------------------------|------------|-------------|------------|---------|---------|--------|
| 1   | 2-Acetyl-5-methylthiophene        | 925        | 6770        | 13679-74-8 | mainlib | C7H8OS  | 140    |
| 2   | Ethanone, 1-(4-methyl-2-thienyl)- | 890        | 1699        | 13679-73-7 | mainlib | C7H8OS  | 140    |
| 3   | 2-Acetyl-3-methylthiophene        | 889        | 6543        | 13679-72-6 | replib  | C7H8OS  | 140    |
| 4   | 2-Acetyl-3-methylthiophene        | 877        | 1097        | 13679-72-6 | mainlib | C7H8OS  | 140    |
| 5   | 2-Acetyl-5-methylthiophene        | 867        | 2586        | 13679-74-8 | replib  | C7H8OS  | 140    |

## Isoquinoline

1st Dimension R.T. = 934.74  
2nd Dimension R.T. = 2.079  
Quant Mass(es) = 129  
S/N = 547.95  
Area = 150067  
Height = 15869  
Similarity = 825

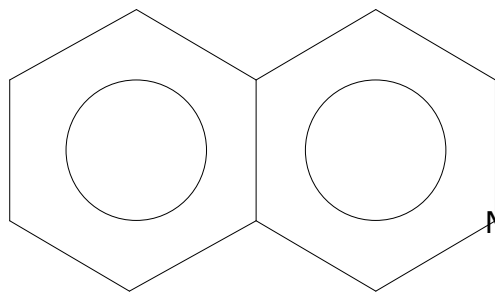

Peak Apex - sample "AnBxr B (20191121):1", peak 1691, at 934.74 , 2.079 sec , sec (Spec # 69215)

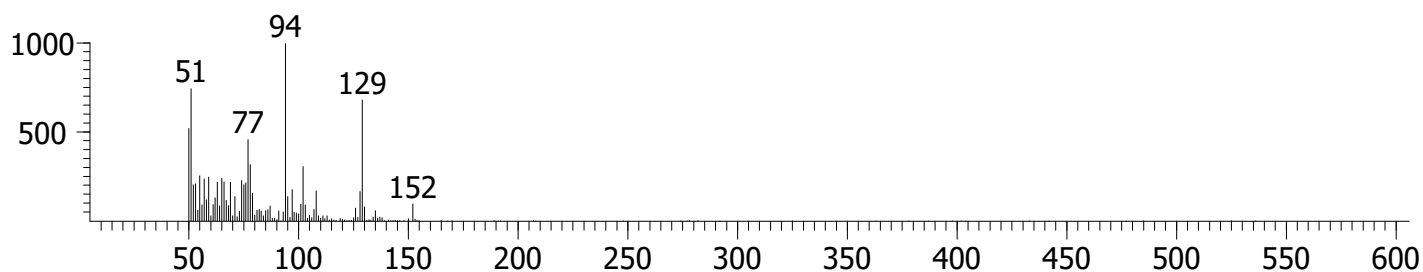

Peak True - sample "AnBxr B (20191121):1", peak 1691, at 934.74 , 2.079 sec , sec (Spec # 69215)

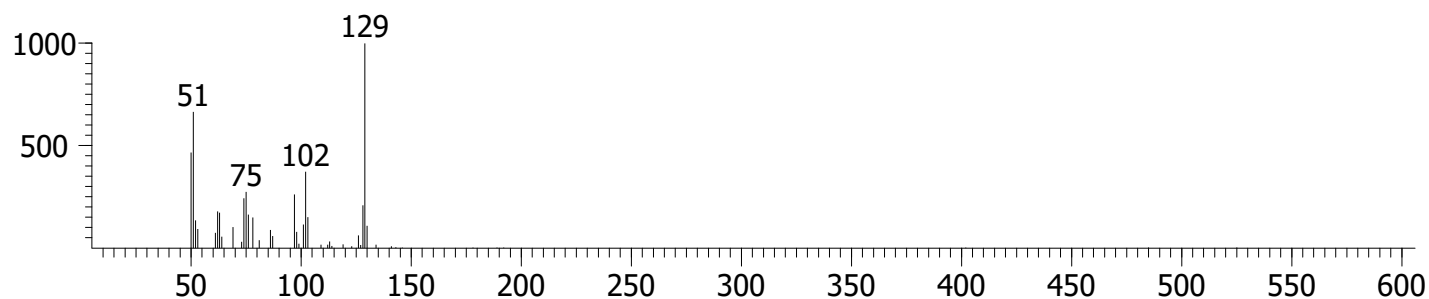

Library Hit - similarity 825, "Isoquinoline"

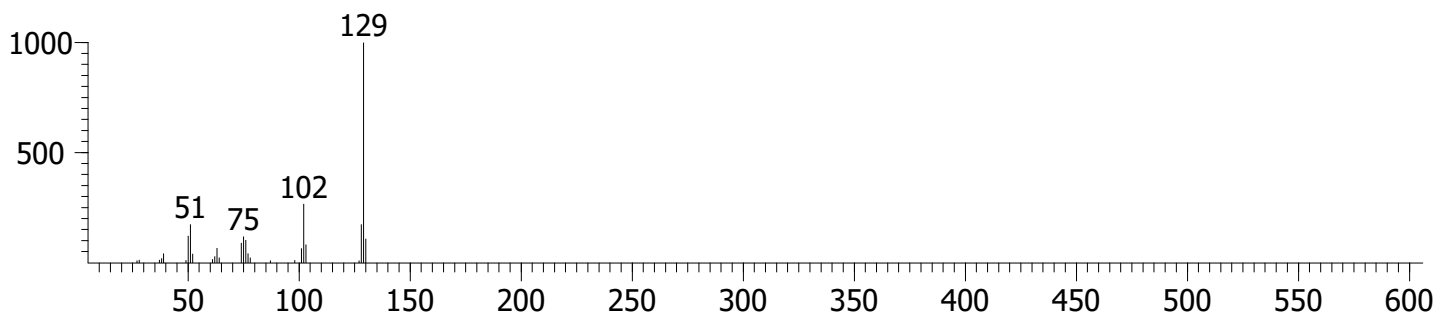

| Hit | Name                              | Similarity | Probability | CAS       | Library | Formula | Weight |
|-----|-----------------------------------|------------|-------------|-----------|---------|---------|--------|
| 1   | Isoquinoline                      | 825        | 4016        | 119-65-3  | replib  | C9H7N   | 129    |
| 2   | Isoquinoline                      | 821        | 4016        | 119-65-3  | replib  | C9H7N   | 129    |
| 3   | Quinoline                         | 817        | 2996        | 91-22-5   | replib  | C9H7N   | 129    |
| 4   | 2-Propenenitrile, 3-phenyl-, (E)- | 812        | 2415        | 1885-38-7 | replib  | C9H7N   | 129    |
| 5   | Isoquinoline                      | 776        | 4016        | 119-65-3  | replib  | C9H7N   | 129    |

# 1H-Pyrrole-2,5-dione, 3-ethenyl-4-methyl-

1st Dimension R.T. = 952.23  
2nd Dimension R.T. = 1.987  
Quant Mass(es) = 66  
S/N = 1814.6  
Area = 967416  
Height = 113150  
Similarity = 890

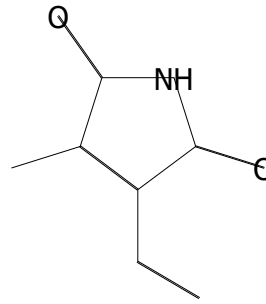

Peak Apex - sample "AnBxr B (20191121):1", peak 1770, at 952.23 , 1.987 sec , sec (Spec # 71851)

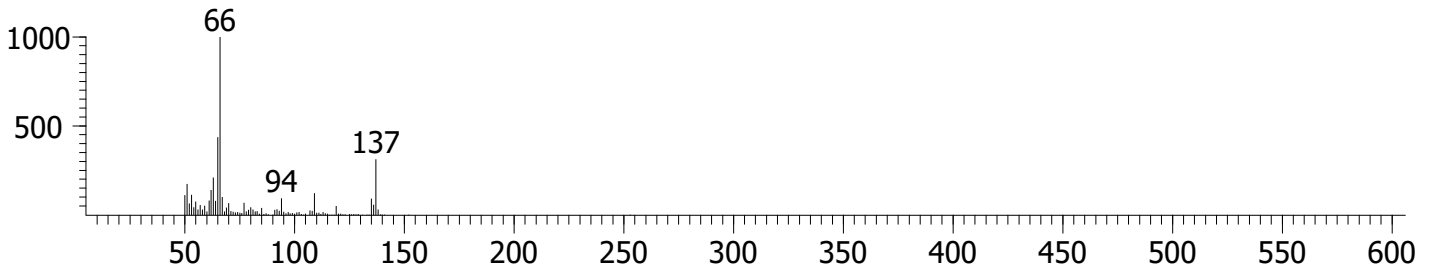

Peak True - sample "AnBxr B (20191121):1", peak 1770, at 952.23 , 1.987 sec , sec (Spec # 71851)

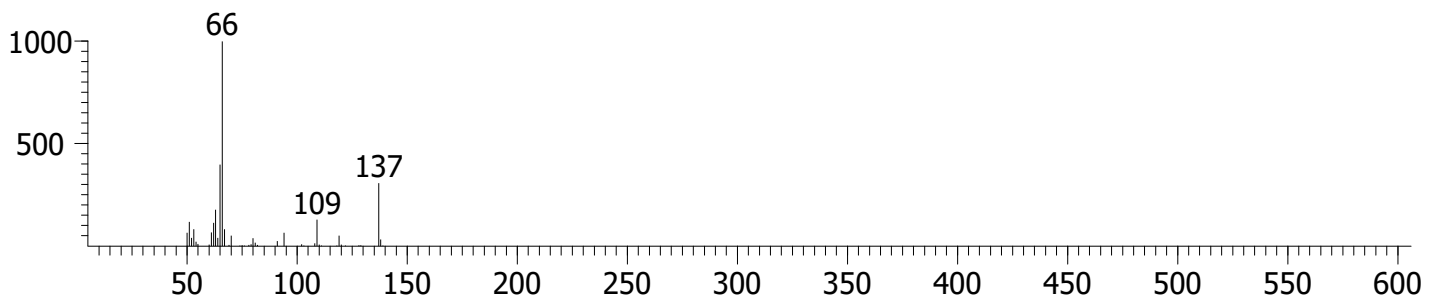

Library Hit - similarity 890, "1H-Pyrrole-2,5-dione, 3-ethenyl-4-methyl-"

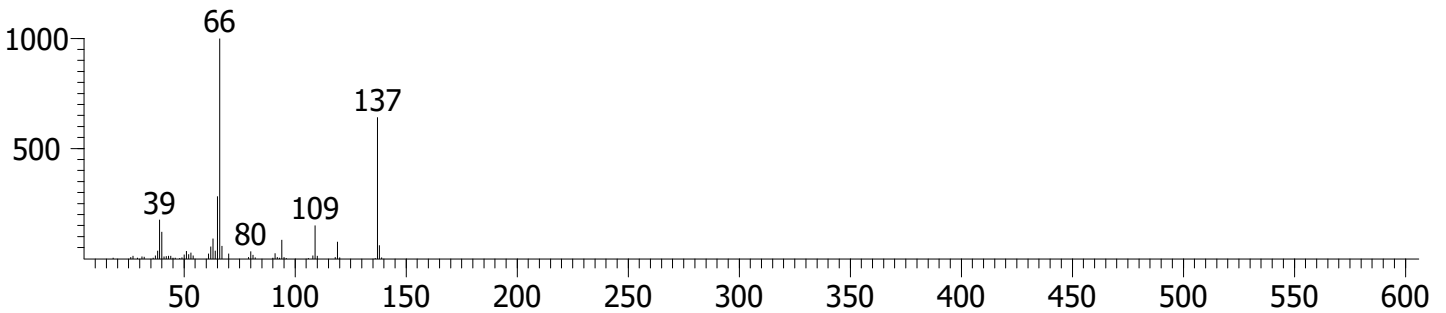

| Hit | Name                                      | Similarity | Probability | CAS        | Library | Formula | Weight |
|-----|-------------------------------------------|------------|-------------|------------|---------|---------|--------|
| 1   | 1H-Pyrrole-2,5-dione, 3-ethenyl-4-methyl- | 890        | 9277        | 21494-57-5 | replib  | C7H7NO2 | 137    |
| 2   | 1-Penten-3-yne                            | 762        | 3604        | 646-05-9   | mainlib | C5H6    | 66     |
| 3   | 1-Buten-3-yne, 2-methyl-                  | 746        | 285         | 78-80-8    | replib  | C5H6    | 66     |
| 4   | 1H-Pyrrole-2,5-dione, 3-ethenyl-4-methyl- | 745        | 1967        | 21494-57-5 | mainlib | C7H7NO2 | 137    |
| 5   | 3-Penten-1-yne, (E)-                      | 743        | 252         | 2004-69-5  | replib  | C5H6    | 66     |

## 2-Methoxy-6-methylaniline

1st Dimension R.T. = 1050.17  
2nd Dimension R.T. = 2.020  
Quant Mass(es) = 137  
S/N = 2045.5  
Area = 574155  
Height = 64791  
Similarity = 755

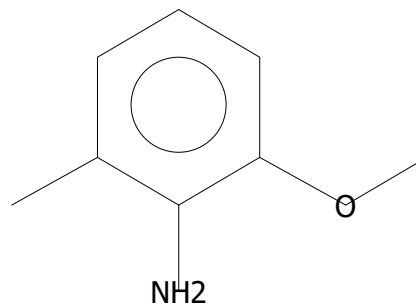

Peak Apex - sample "AnBxr B (20191121):1", peak 2329, at 1050.17 , 2.020 sec , sec (Spec # 86696)

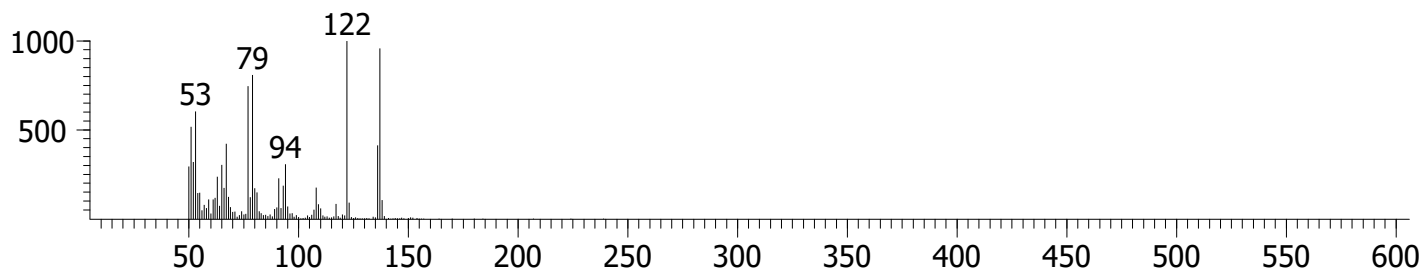

Peak True - sample "AnBxr B (20191121):1", peak 2329, at 1050.17 , 2.020 sec , sec (Spec # 86696)

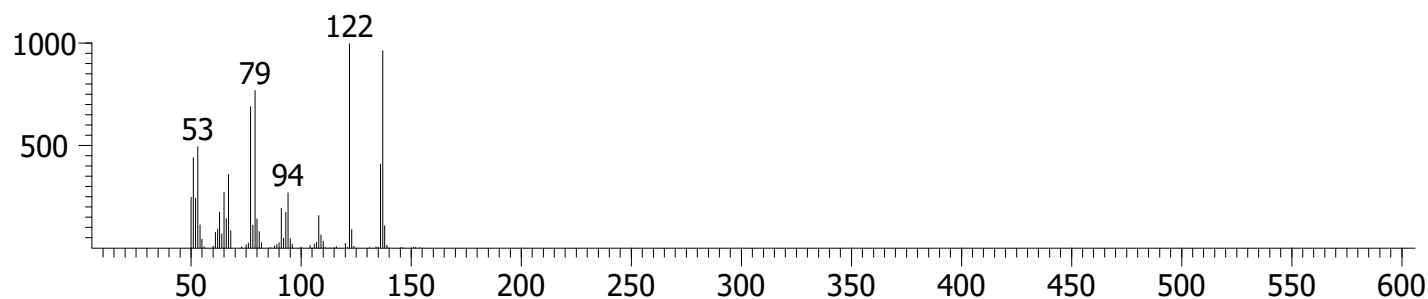

Library Hit - similarity 755, "2-Methoxy-6-methylaniline"

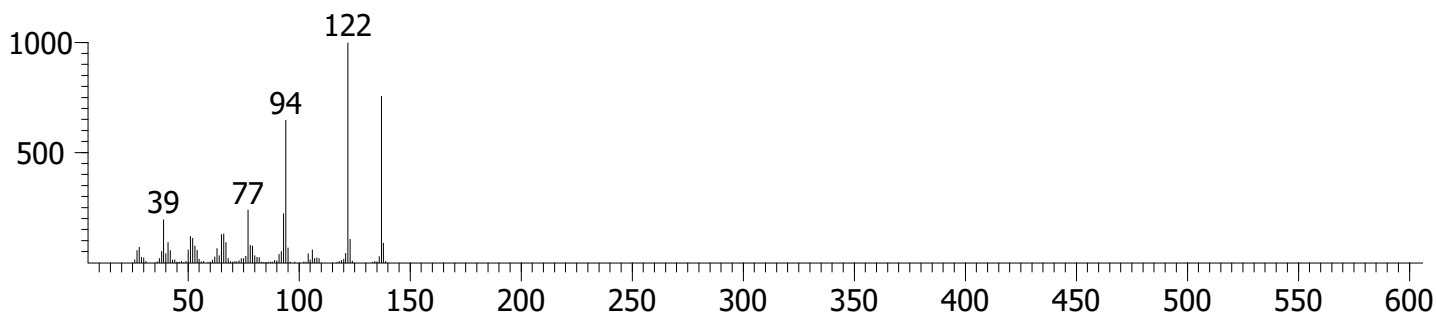

| Hit | Name                             | Similarity | Probability | CAS         | Library | Formula | Weight |
|-----|----------------------------------|------------|-------------|-------------|---------|---------|--------|
| 1   | 2-Methoxy-6-methylaniline        | 755        | 5468        | 50868-73-0  | replib  | C8H11NO | 137    |
| 2   | Phenol, 4-(ethylamino)-          | 738        | 1427        | 659-34-7    | mainlib | C8H11NO | 137    |
| 3   | Phenol, 2-(ethylamino)-          | 733        | 1150        | 614-70-0    | mainlib | C8H11NO | 137    |
| 4   | Benzeneamine, 3-ethyl-4-hydroxy- | 733        | 1150        | 178698-88-9 | mainlib | C8H11NO | 137    |
| 5   | m-Ethylaminophenol               | 728        | 1608        | 621-31-8    | replib  | C8H11NO | 137    |

## 2,3-Dichlorobenzonitrile

1st Dimension R.T. = 1060.67  
2nd Dimension R.T. = 2.066  
Quant Mass(es) = 171  
S/N = 2306.7  
Area = 264302  
Height = 30569  
Similarity = 867

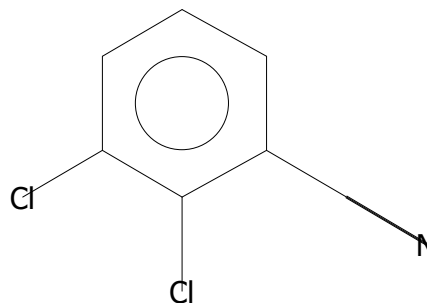

Peak Apex - sample "AnBxr B (20191121):1", peak 2395, at 1060.67 , 2.066 sec , sec (Spec # 88293)

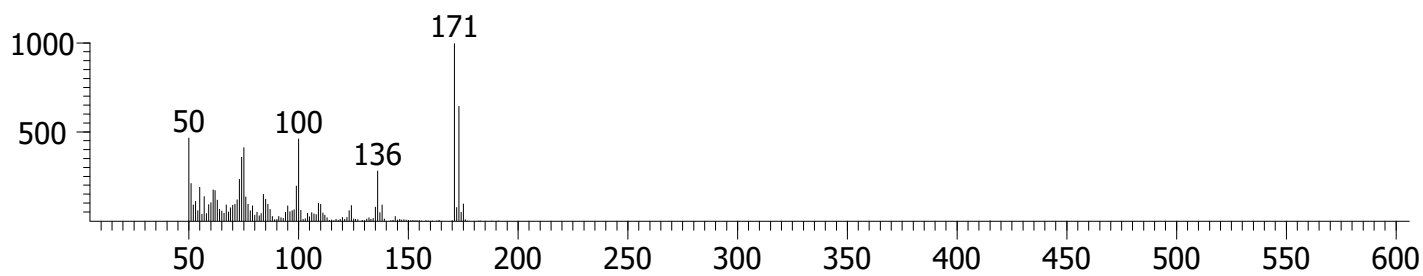

Peak True - sample "AnBxr B (20191121):1", peak 2395, at 1060.67 , 2.066 sec , sec (Spec # 88293)

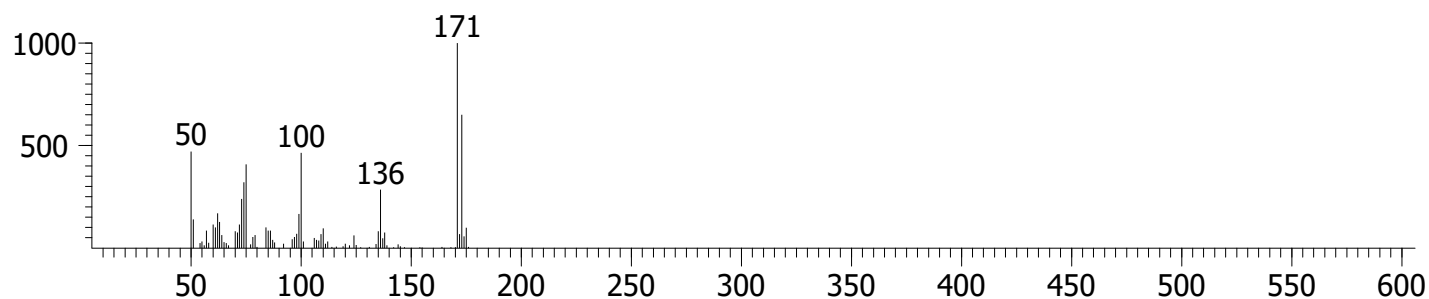

Library Hit - similarity 867, "2,3-Dichlorobenzonitrile"

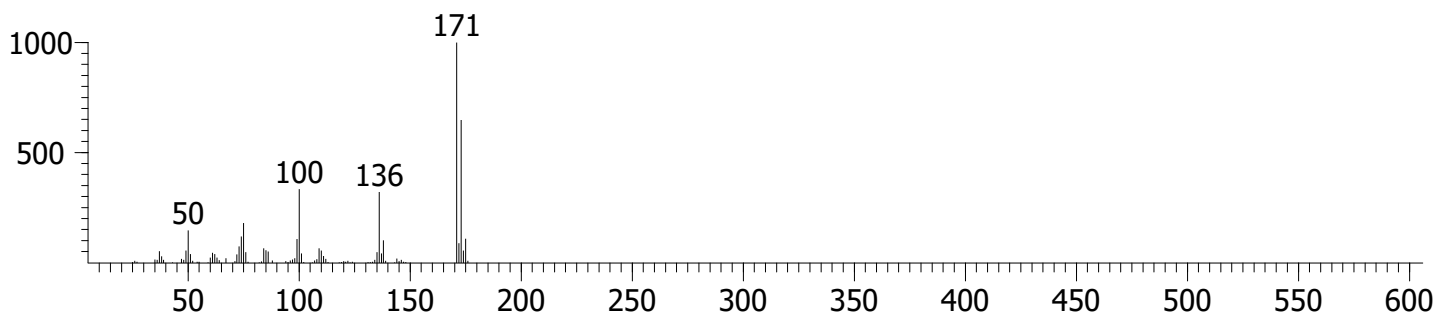

| Hit | Name                        | Similarity | Probability | CAS        | Library | Formula  | Weight |
|-----|-----------------------------|------------|-------------|------------|---------|----------|--------|
| 1   | 2,3-Dichlorobenzonitrile    | 867        | 3214        | 6574-97-6  | mainlib | C7H3Cl2N | 171    |
| 2   | 2,5-Dichlorobenzonitrile    | 864        | 2840        | 21663-61-6 | mainlib | C7H3Cl2N | 171    |
| 3   | 3,5-Dichlorobenzonitrile    | 855        | 5128        | 6575-00-4  | replib  | C7H3Cl2N | 171    |
| 4   | Benzonitrile, 2,6-dichloro- | 853        | 4730        | 1194-65-6  | replib  | C7H3Cl2N | 171    |
| 5   | Benzonitrile, 2,6-dichloro- | 850        | 4730        | 1194-65-6  | replib  | C7H3Cl2N | 171    |

# Naphthalene, 1,2,3,4-tetrahydro-5-methyl-

1st Dimension R.T. = 1081.66  
2nd Dimension R.T. = 1.630  
Quant Mass(es) = 105  
S/N = 701.39  
Area = 440534  
Height = 45378  
Similarity = 742

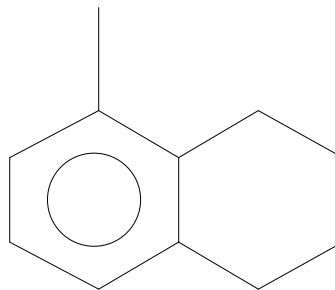

Peak Apex - sample "AnBxr B (20191121):1", peak 2488, at 1081.66 , 1.630 sec , sec (Spec # 91407)

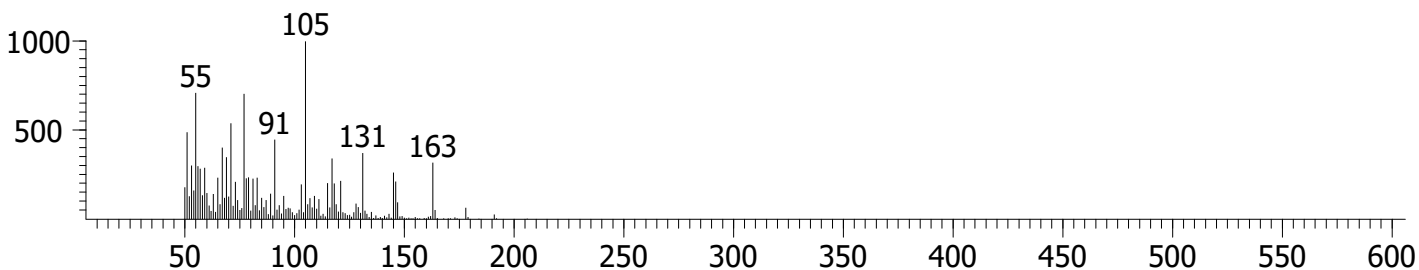

Peak True - sample "AnBxr B (20191121):1", peak 2488, at 1081.66 , 1.630 sec , sec (Spec # 91407)

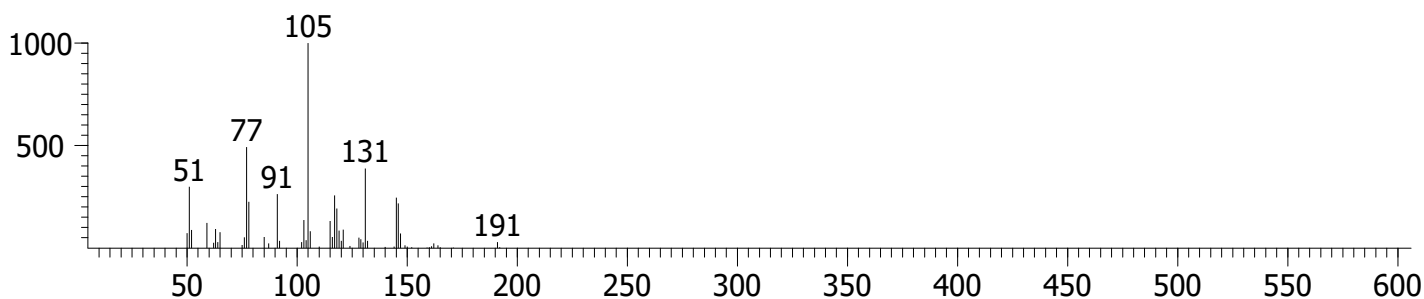

Library Hit - similarity 742, "Naphthalene, 1,2,3,4-tetrahydro-5-methyl-"

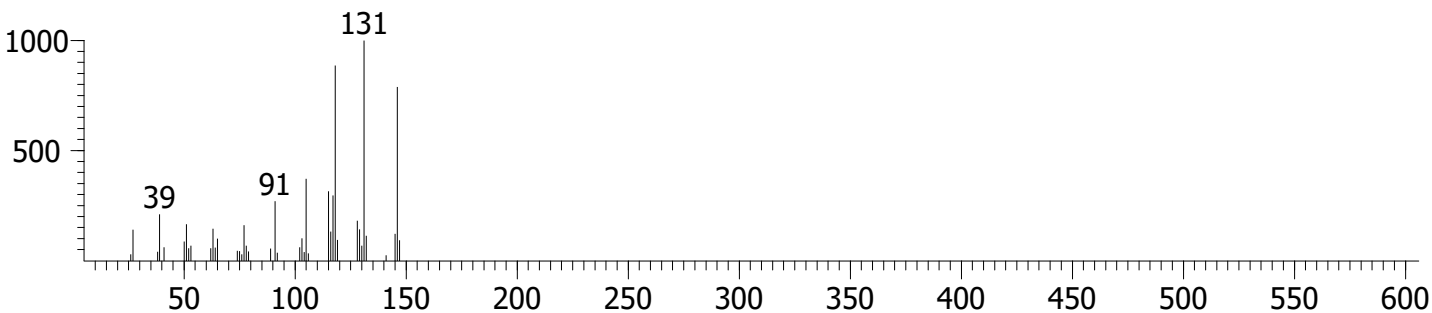

| Hit | Name                                      | Similarity | Probability | CAS       | Library | Formula | Weight |
|-----|-------------------------------------------|------------|-------------|-----------|---------|---------|--------|
| 1   | Naphthalene, 1,2,3,4-tetrahydro-5-methyl- | 742        | 3342        | 2809-64-5 | replib  | C11H14  | 146    |
| 2   | Naphthalene, 1,2,3,4-tetrahydro-6-methyl- | 733        | 2426        | 1680-51-9 | replib  | C11H14  | 146    |
| 3   | Naphthalene, 1,2,3,4-tetrahydro-6-methyl- | 733        | 1578        | 1680-51-9 | mainlib | C11H14  | 146    |
| 4   | Naphthalene, 1,2,3,4-tetrahydro-6-methyl- | 732        | 2426        | 1680-51-9 | replib  | C11H14  | 146    |
| 5   | Naphthalene, 1,2,3,4-tetrahydro-5-methyl- | 731        | 1456        | 2809-64-5 | mainlib | C11H14  | 146    |

# Propofol

1st Dimension R.T. = 1085.15  
2nd Dimension R.T. = 1.657  
Quant Mass(es) = 163  
S/N = 11918  
Area = 1967761  
Height = 272241  
Similarity = 908

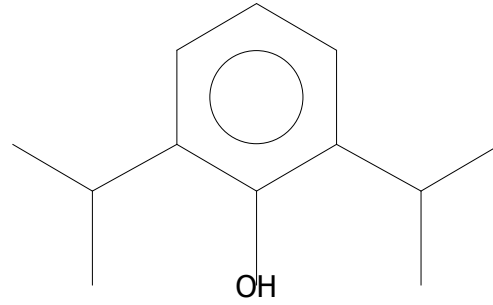

Peak Apex - sample "AnBxr B (20191121):1", peak 2510, at 1085.15 , 1.657 sec , sec (Spec # 91941)

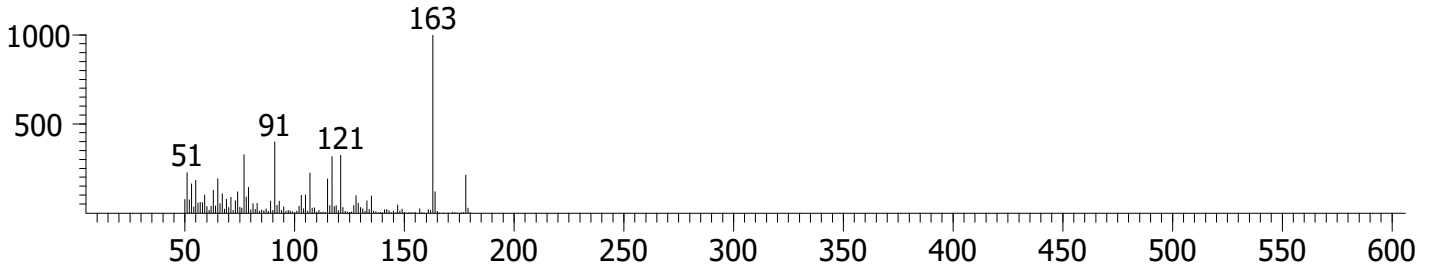

Peak True - sample "AnBxr B (20191121):1", peak 2510, at 1085.15 , 1.657 sec , sec (Spec # 91941)

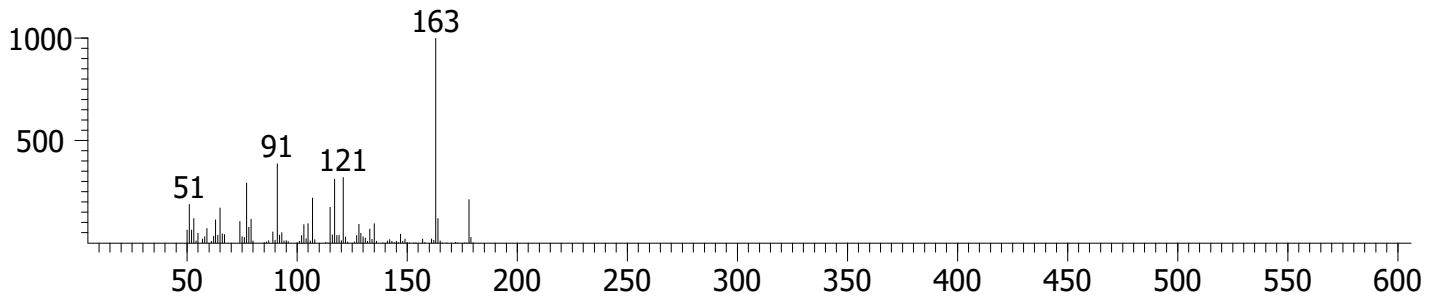

Library Hit - similarity 908, "Propofol"

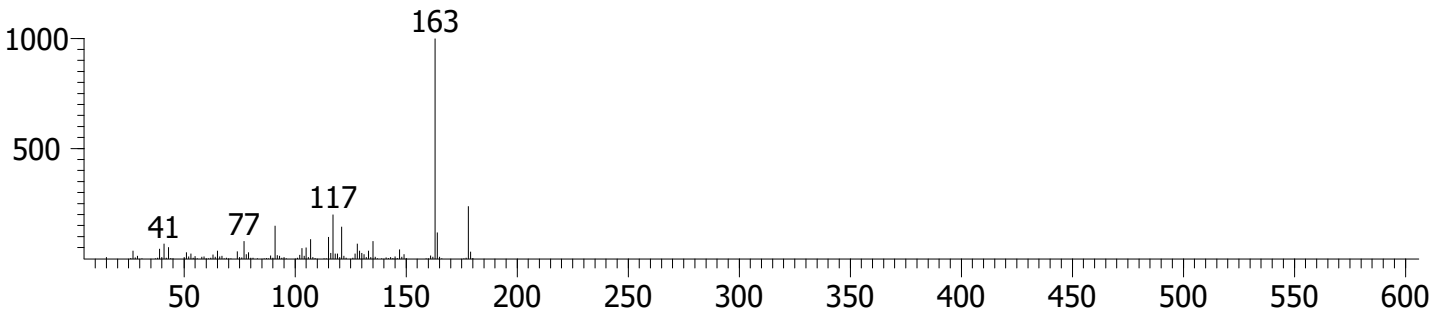

| Hit | Name                            | Similarity | Probability | CAS        | Library | Formula | Weight |
|-----|---------------------------------|------------|-------------|------------|---------|---------|--------|
| 1   | Propofol                        | 908        | 8989        | 2078-54-8  | replib  | C12H18O | 178    |
| 2   | Propofol                        | 889        | 8989        | 2078-54-8  | replib  | C12H18O | 178    |
| 3   | Propofol                        | 885        | 8989        | 2078-54-8  | replib  | C12H18O | 178    |
| 4   | Phenol, 2,5-bis(1-methylethyl)- | 874        | 4227        | 35946-91-9 | mainlib | C12H18O | 178    |
| 5   | Propofol                        | 873        | 4063        | 2078-54-8  | mainlib | C12H18O | 178    |

# Phenol, 2,4,6-trichloro-

1st Dimension R.T. = 1088.65  
2nd Dimension R.T. = 1.795  
Quant Mass(es) = 196  
S/N = 631.83  
Area = 57536  
Height = 7495.2  
Similarity = 861

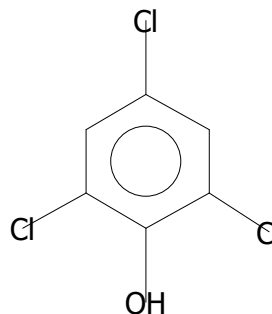

Peak Apex - sample "AnBxr B (20191121):1", peak 2533, at 1088.65 , 1.795 sec , sec (Spec # 92492)

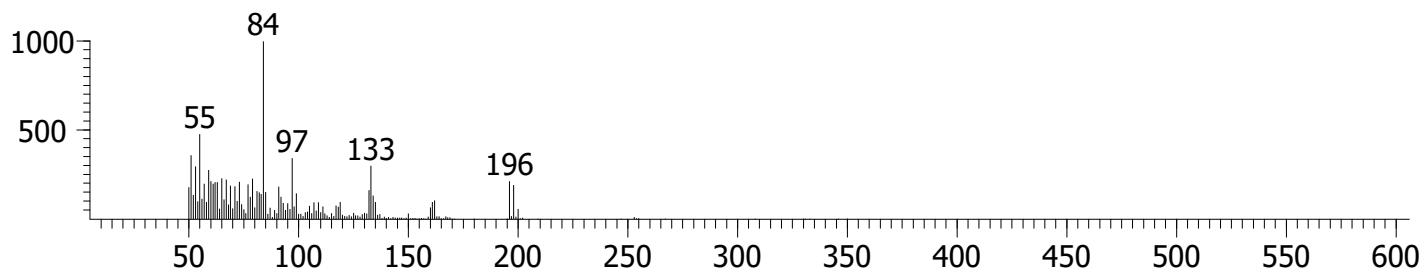

Peak True - sample "AnBxr B (20191121):1", peak 2533, at 1088.65 , 1.795 sec , sec (Spec # 92492)

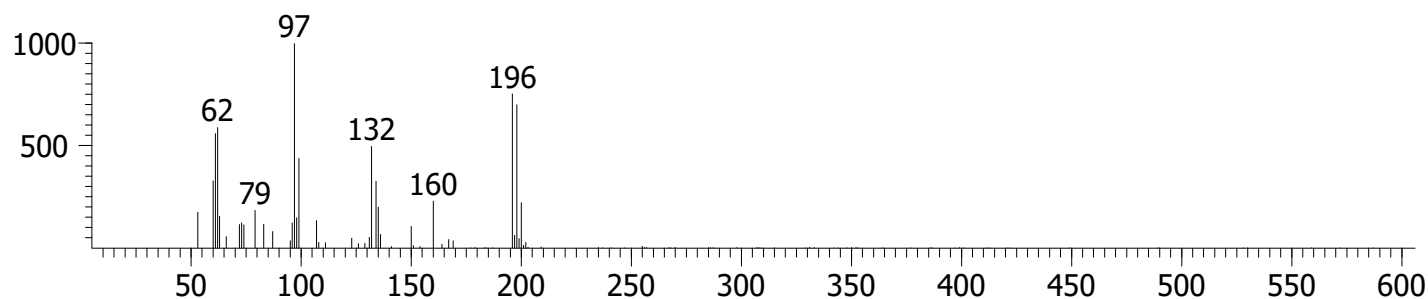

Library Hit - similarity 861, "Phenol, 2,4,6-trichloro-"

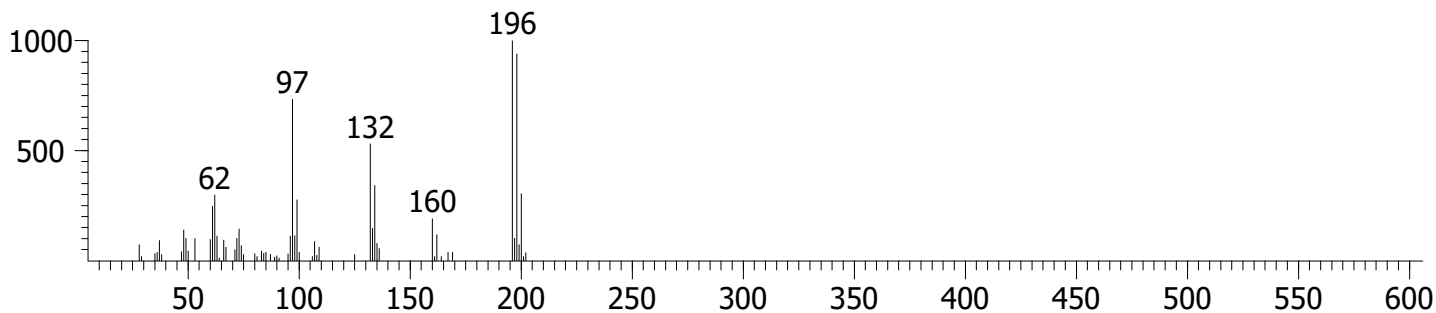

| Hit | Name                     | Similarity | Probability | CAS      | Library | Formula  | Weight |
|-----|--------------------------|------------|-------------|----------|---------|----------|--------|
| 1   | Phenol, 2,4,6-trichloro- | 861        | 2778        | 88-06-2  | replib  | C6H3Cl3O | 196    |
| 2   | Phenol, 2,3,6-trichloro- | 861        | 2778        | 933-75-5 | replib  | C6H3Cl3O | 196    |
| 3   | Phenol, 2,4,6-trichloro- | 856        | 2778        | 88-06-2  | replib  | C6H3Cl3O | 196    |
| 4   | Phenol, 2,3,5-trichloro- | 852        | 2017        | 933-78-8 | replib  | C6H3Cl3O | 196    |
| 5   | Phenol, 2,4,5-trichloro- | 847        | 1625        | 95-95-4  | replib  | C6H3Cl3O | 196    |



# 1,2-Benzenedicarboxaldehyde

1st Dimension R.T. = 1148.12  
2nd Dimension R.T. = 2.336  
Quant Mass(es) = 105  
S/N = 585.72  
Area = 284621  
Height = 30147  
Similarity = 883

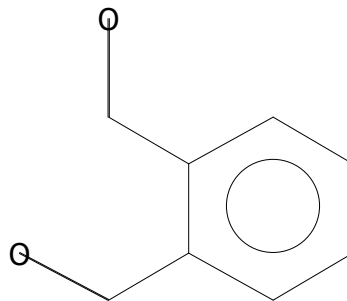

Peak Apex - sample "AnBxr B (20191121):1", peak 2894, at 1148.12 , 2.336 sec , sec (Spec # 101584)

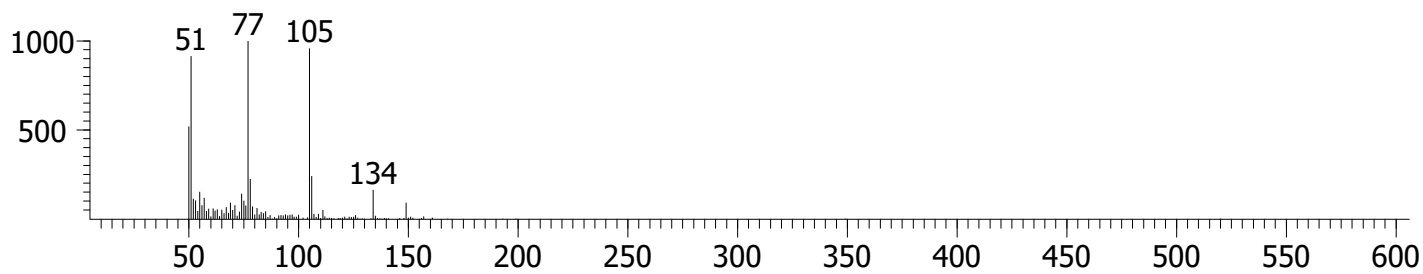

Peak True - sample "AnBxr B (20191121):1", peak 2894, at 1148.12 , 2.336 sec , sec (Spec # 101584)

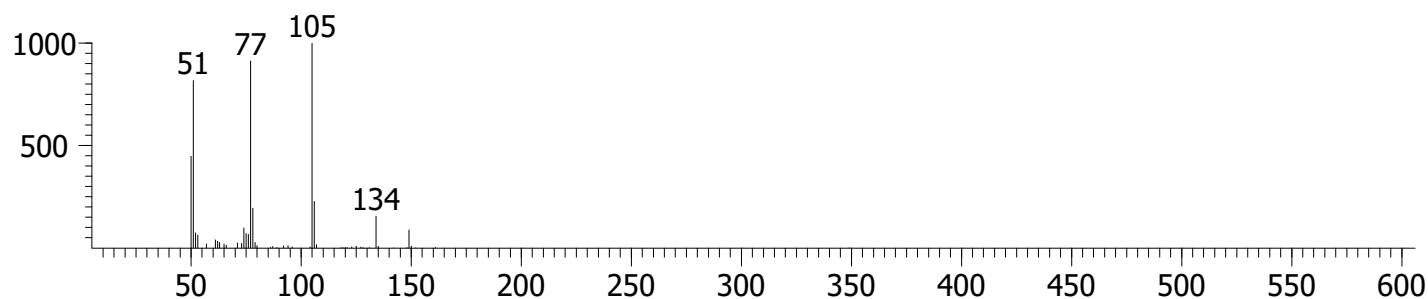

Library Hit - similarity 883, "1,2-Benzenedicarboxaldehyde"

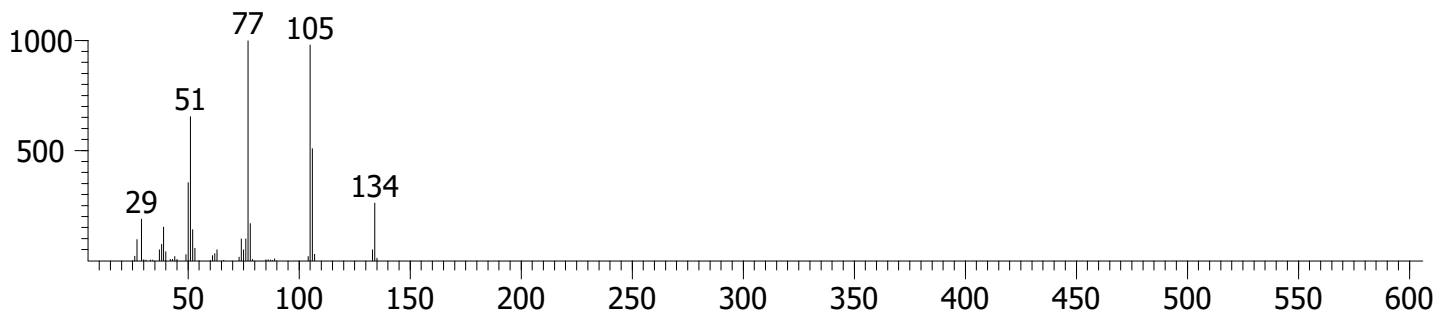

| Hit | Name                                      | Similarity | Probability | CAS      | Library | Formula   | Weight |
|-----|-------------------------------------------|------------|-------------|----------|---------|-----------|--------|
| 1   | 1,2-Benzenedicarboxaldehyde               | 883        | 5589        | 643-79-8 | replib  | C8H6O2    | 134    |
| 2   | ethanone, 2-chloro-2,2-difluoro-1-phenyl- | 871        | 3247        | 0-00-0   | mainlib | C8H5ClF2O | 190    |
| 3   | 1,2-Benzenedicarboxaldehyde               | 865        | 5589        | 643-79-8 | replib  | C8H6O2    | 134    |
| 4   | 1,2-Benzenedicarboxaldehyde               | 852        | 1577        | 643-79-8 | mainlib | C8H6O2    | 134    |
| 5   | 1,2-Benzenedicarboxaldehyde               | 841        | 5589        | 643-79-8 | replib  | C8H6O2    | 134    |

## p-Chloromandelic acid

1st Dimension R.T. = 1165.61  
2nd Dimension R.T. = 2.039  
Quant Mass(es) = 141  
S/N = 360.30  
Area = 76169  
Height = 7800.6  
Similarity = 807

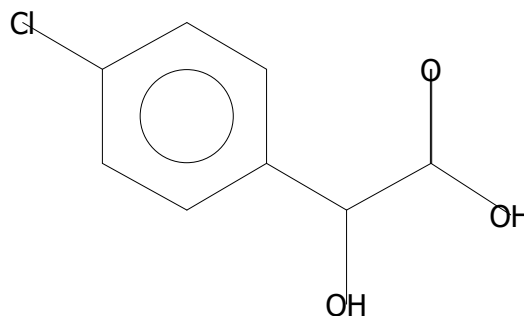

Peak Apex - sample "AnBxr B (20191121):1", peak 2991, at 1165.61 , 2.039 sec , sec (Spec # 104189)

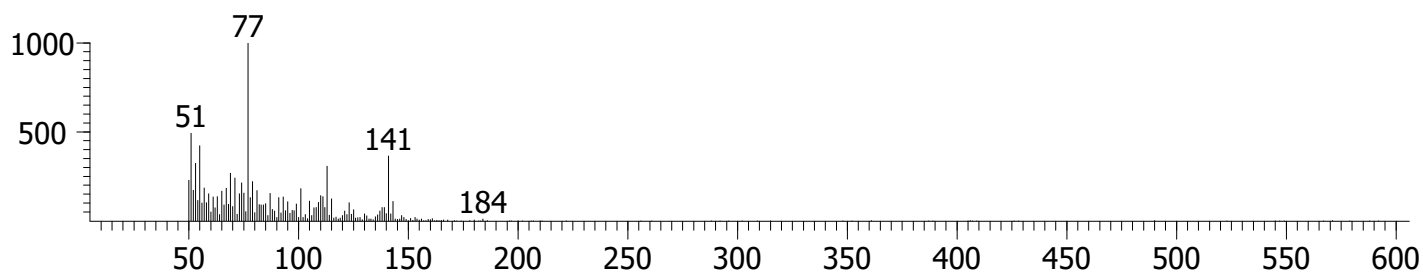

Peak True - sample "AnBxr B (20191121):1", peak 2991, at 1165.61 , 2.039 sec , sec (Spec # 104189)

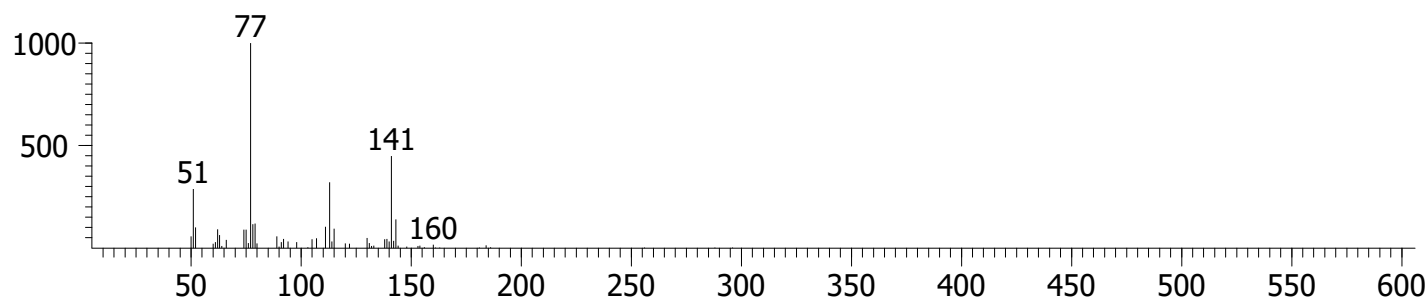

Library Hit - similarity 807, "p-Chloromandelic acid"

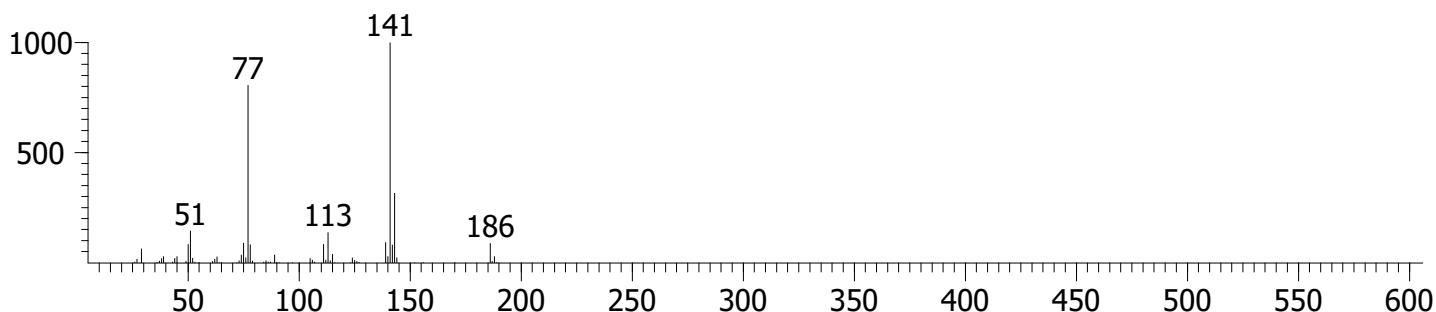

| Hit | Name                                                            | Similarity | Probability | CAS         | Library | Formula     | Weight |
|-----|-----------------------------------------------------------------|------------|-------------|-------------|---------|-------------|--------|
| 1   | p-Chloromandelic acid                                           | 807        | 4824        | 492-86-4    | mainlib | C8H7ClO3    | 186    |
| 2   | p-Chloromandelic acid                                           | 794        | 6999        | 492-86-4    | replib  | C8H7ClO3    | 186    |
| 3   | 1,2-Bis(4-chlorophenyl)ethane-1,2-diol                          | 793        | 3019        | 38152-44-2  | mainlib | C14H12Cl2O2 | 282    |
| 4   | p-Chloromandelic acid                                           | 787        | 6999        | 492-86-4    | replib  | C8H7ClO3    | 186    |
| 5   | Benzenemethanol, 4-chloro-à-(2-nitrocyclopentyl)-, [1à(R*),2à]- | 737        | 575         | 103130-03-6 | mainlib | C12H14ClNO3 | 255    |

# rt-butyl-4-hydroxy-4-methylcyclohexa-2,5-die

1st Dimension R.T. = 1221.58  
2nd Dimension R.T. = 1.498  
Quant Mass(es) = 165  
S/N = 4079.9  
Area = 694679  
Height = 89267  
Similarity = 869

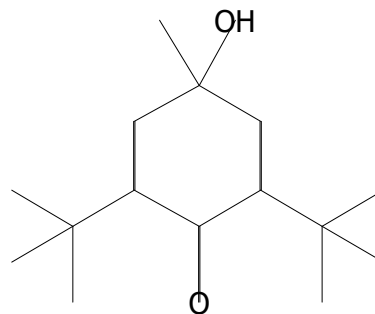

Peak Apex - sample "AnBxr B (20191121):1", peak 3300, at 1221.58 , 1.498 sec , sec (Spec # 112587)

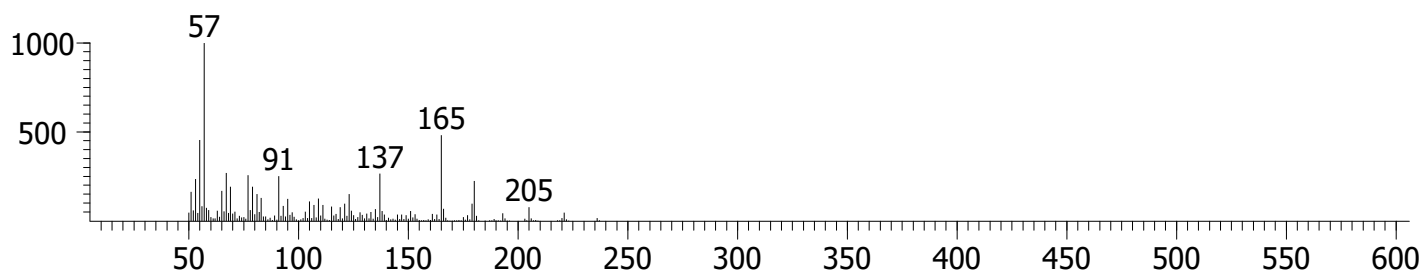

Peak True - sample "AnBxr B (20191121):1", peak 3300, at 1221.58 , 1.498 sec , sec (Spec # 112587)

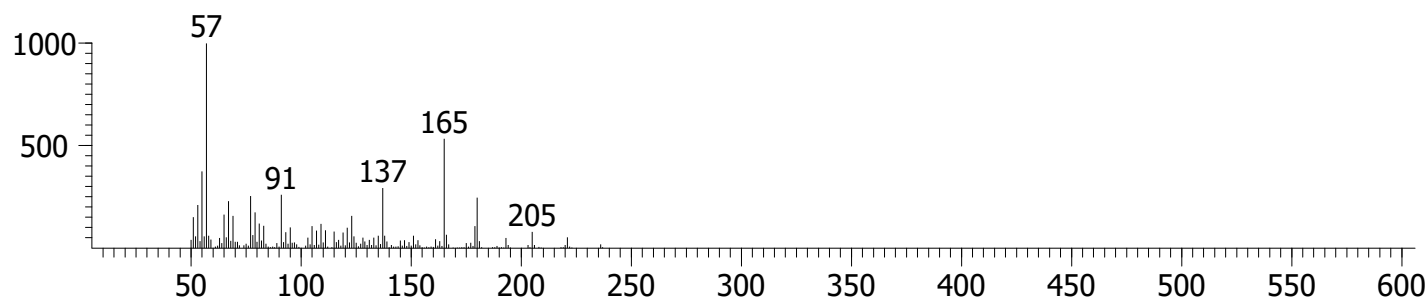

Library Hit - similarity 869, "2,6-Di-tert-butyl-4-hydroxy-4-methylcyclohexa-2,5-dien-1-one"

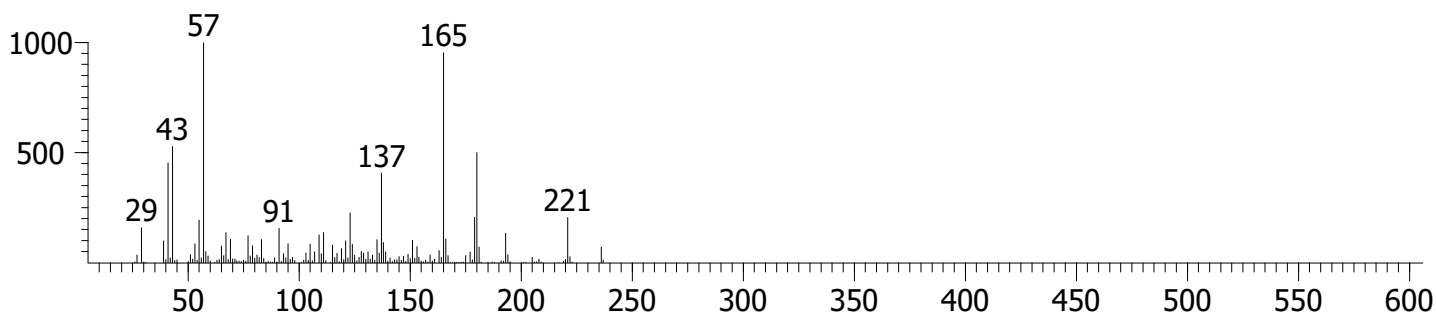

| Hit | Name                                                         | Similarity | Probability | CAS        | Library | Formula  | Weight |
|-----|--------------------------------------------------------------|------------|-------------|------------|---------|----------|--------|
| 1   | 2,6-Di-tert-butyl-4-hydroxy-4-methylcyclohexa-2,5-dien-1-one | 869        | 8150        | 10396-80-2 | mainlib | C15H24O2 | 236    |
| 2   | Menthol, 1'-(butyn-3-one-1-yl)-, (1S,2S,5R)-                 | 713        | 210         | 0-00-0     | mainlib | C14H22O2 | 222    |
| 3   | 1H-Inden-1-ol, 2,4,5,6,7,7a-hexahydro-4,4,7a-trimethyl-      | 711        | 193         | 43125-89-9 | mainlib | C12H20O  | 180    |
| 4   | Menthol, 1'-(butyn-3-one-1-yl)-, (1R,2S,5R)-                 | 707        | 163         | 0-00-0     | mainlib | C14H22O2 | 222    |
| 5   | 2(3H)-Naphthalenone, 4,4a,5,6,7,8-hexahydro-1-methoxy-       | 703        | 138         | 70703-08-1 | mainlib | C11H16O2 | 180    |

## 2H-Indol-2-one, 1,3-dihydro-

1st Dimension R.T. = 1246.06  
2nd Dimension R.T. = 2.488  
Quant Mass(es) = 104  
S/N = 1324.1  
Area = 3694117  
Height = 260299  
Similarity = 917

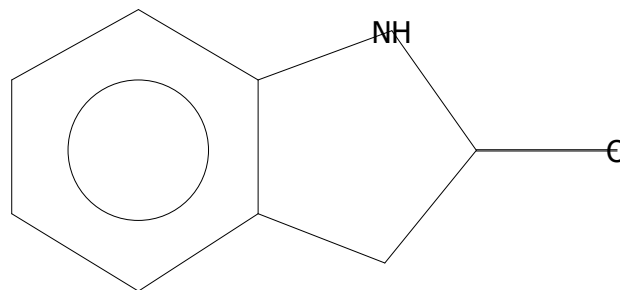

Peak Apex - sample "AnBxr B (20191121):1", peak 3476, at 1246.06 , 2.488 sec , sec (Spec # 116447)

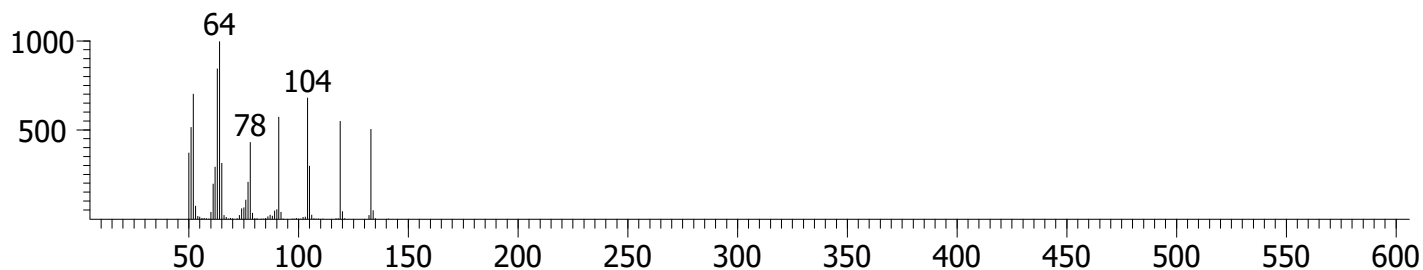

Peak True - sample "AnBxr B (20191121):1", peak 3476, at 1246.06 , 2.488 sec , sec (Spec # 116447)

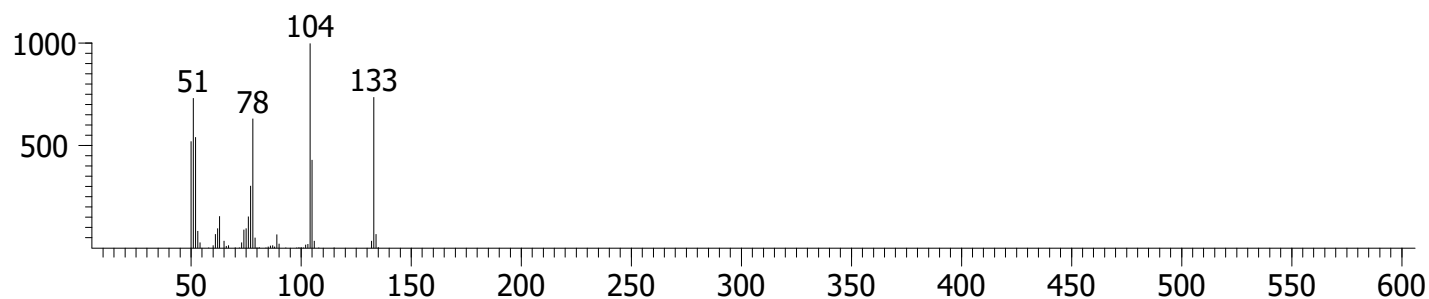

Library Hit - similarity 917, "2H-Indol-2-one, 1,3-dihydro-"

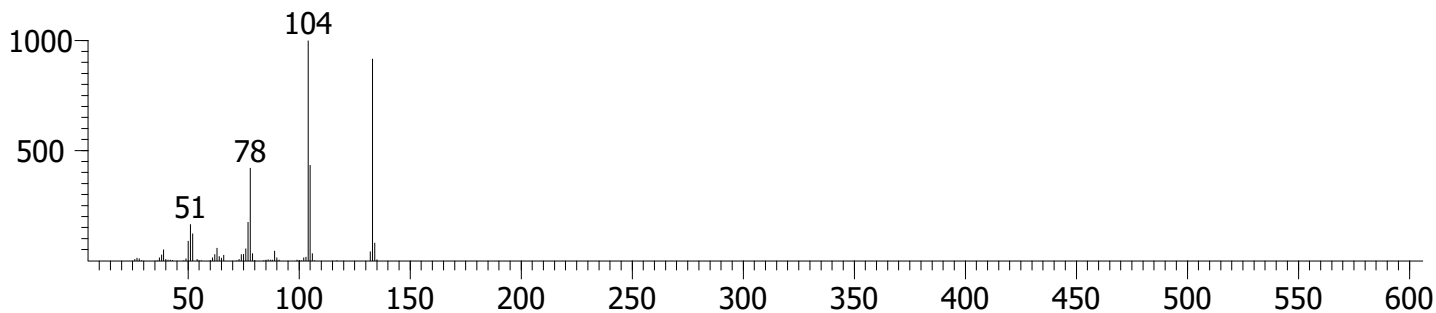

| Hit | Name                         | Similarity | Probability | CAS     | Library | Formula | Weight |
|-----|------------------------------|------------|-------------|---------|---------|---------|--------|
| 1   | 2H-Indol-2-one, 1,3-dihydro- | 917        | 7586        | 59-48-3 | replib  | C8H7NO  | 133    |
| 2   | 2H-Indol-2-one, 1,3-dihydro- | 914        | 7586        | 59-48-3 | replib  | C8H7NO  | 133    |
| 3   | 2H-Indol-2-one, 1,3-dihydro- | 910        | 7434        | 59-48-3 | mainlib | C8H7NO  | 133    |
| 4   | 2H-Indol-2-one, 1,3-dihydro- | 894        | 7586        | 59-48-3 | replib  | C8H7NO  | 133    |
| 5   | 2H-Indol-2-one, 1,3-dihydro- | 885        | 7586        | 59-48-3 | replib  | C8H7NO  | 133    |

## 2,4-Di-tert-butylphenol

1st Dimension R.T. = 1270.55  
2nd Dimension R.T. = 1.617  
Quant Mass(es) = 191  
S/N = 18072  
Area = 1964943  
Height = 257702  
Similarity = 899

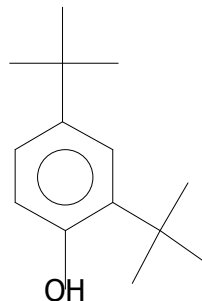

Peak Apex - sample "AnBxr B (20191121):1", peak 3617, at 1270.55 , 1.617 sec , sec (Spec # 120025)

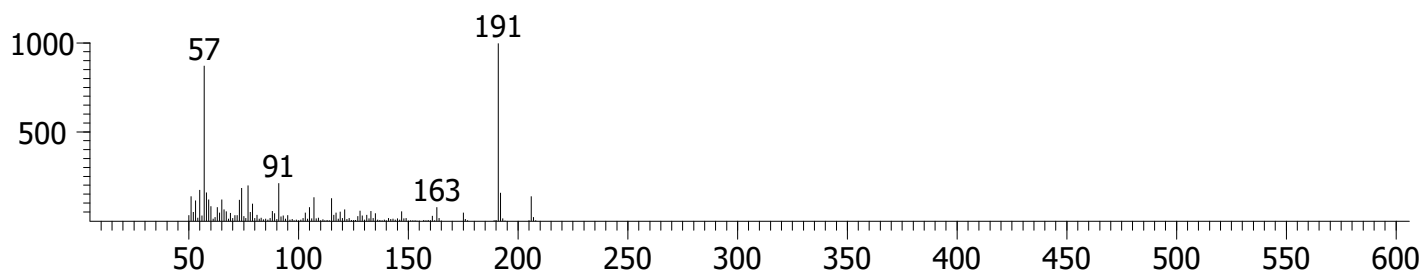

Peak True - sample "AnBxr B (20191121):1", peak 3617, at 1270.55 , 1.617 sec , sec (Spec # 120025)

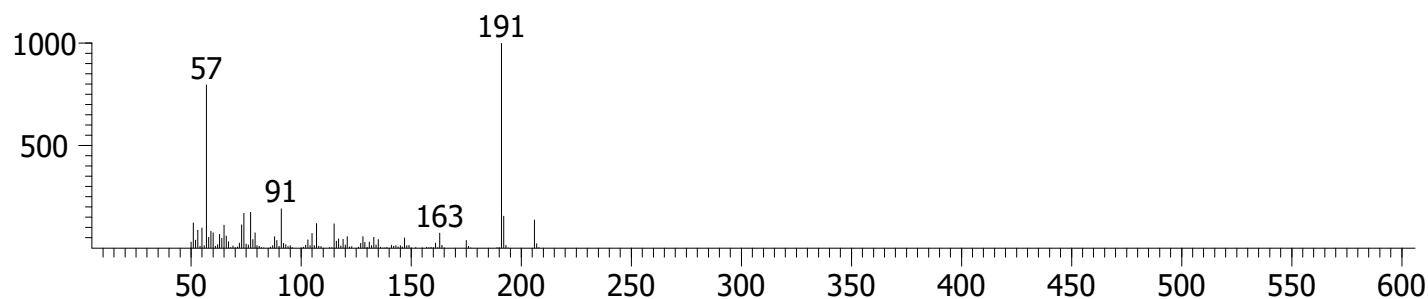

Library Hit - similarity 899, "2,4-Di-tert-butylphenol"

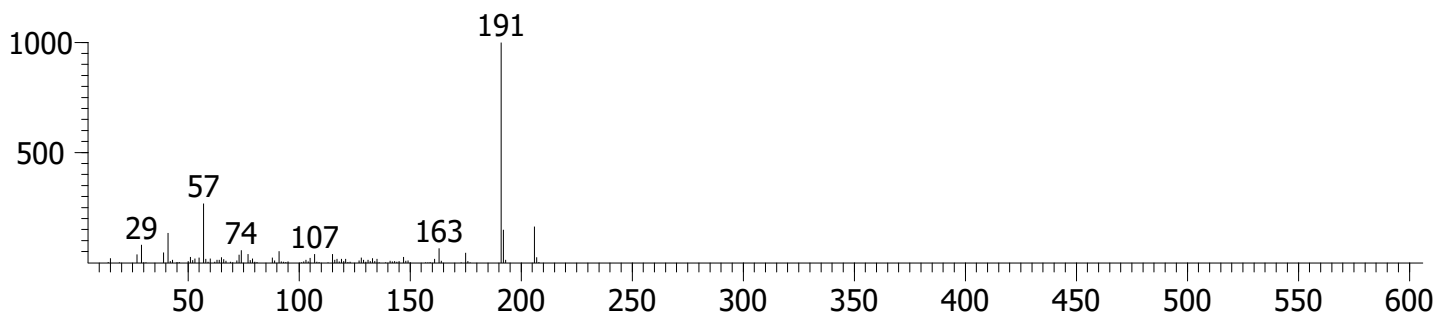

| Hit | Name                                | Similarity | Probability | CAS       | Library | Formula                           | Weight |
|-----|-------------------------------------|------------|-------------|-----------|---------|-----------------------------------|--------|
| 1   | 2,4-Di-tert-butylphenol             | 899        | 4829        | 96-76-4   | replib  | C <sub>14</sub> H <sub>22</sub> O | 206    |
| 2   | Phenol, 2,5-bis(1,1-dimethylethyl)- | 892        | 3699        | 5875-45-6 | replib  | C <sub>14</sub> H <sub>22</sub> O | 206    |
| 3   | 2,4-Di-tert-butylphenol             | 890        | 7557        | 96-76-4   | mainlib | C <sub>14</sub> H <sub>22</sub> O | 206    |
| 4   | 2,4-Di-tert-butylphenol             | 880        | 4829        | 96-76-4   | replib  | C <sub>14</sub> H <sub>22</sub> O | 206    |
| 5   | 2,4-Di-tert-butylphenol             | 877        | 4829        | 96-76-4   | replib  | C <sub>14</sub> H <sub>22</sub> O | 206    |

# Benzamide, 3-methyl-N-methyl-N-propyl-

1st Dimension R.T. = 1361.5  
2nd Dimension R.T. = 1.993  
Quant Mass(es) = 119  
S/N = 36621  
Area = 12419449  
Height = 946726  
Similarity = 930

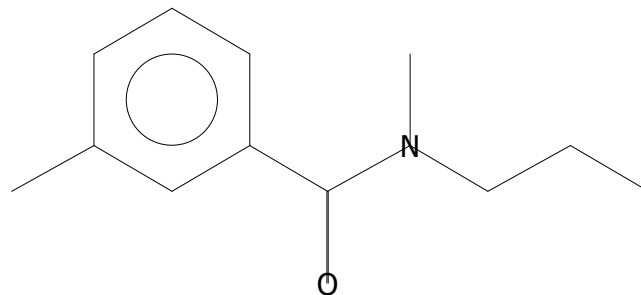

Peak Apex - sample "AnBxr B (20191121):1", peak 4204, at 1361.5 , 1.993 sec , sec (Spec # 133862)

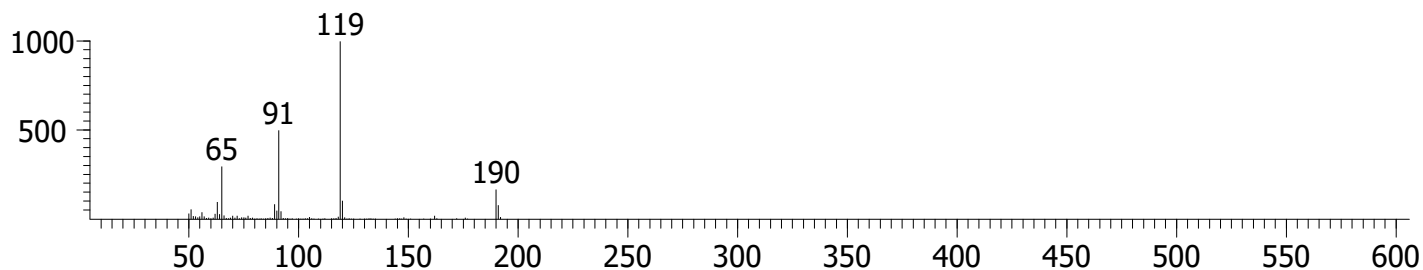

Peak True - sample "AnBxr B (20191121):1", peak 4204, at 1361.5 , 1.993 sec , sec (Spec # 133862)

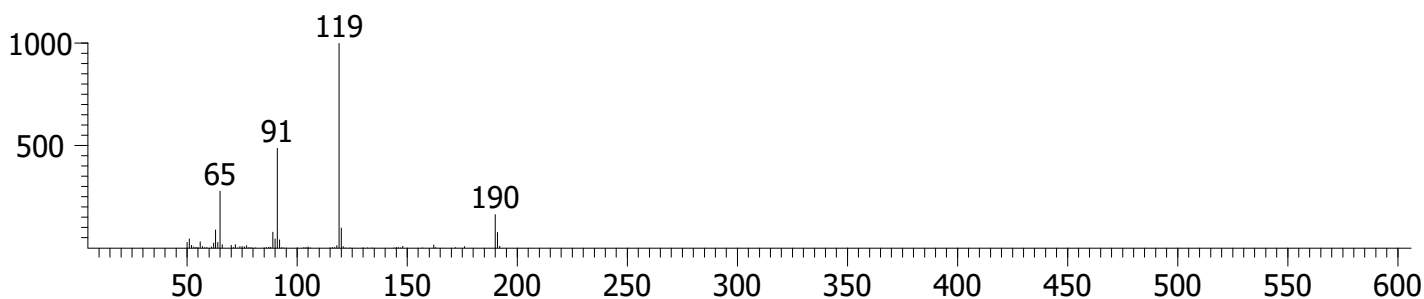

Library Hit - similarity 930, "Benzamide, 3-methyl-N-methyl-N-propyl-"

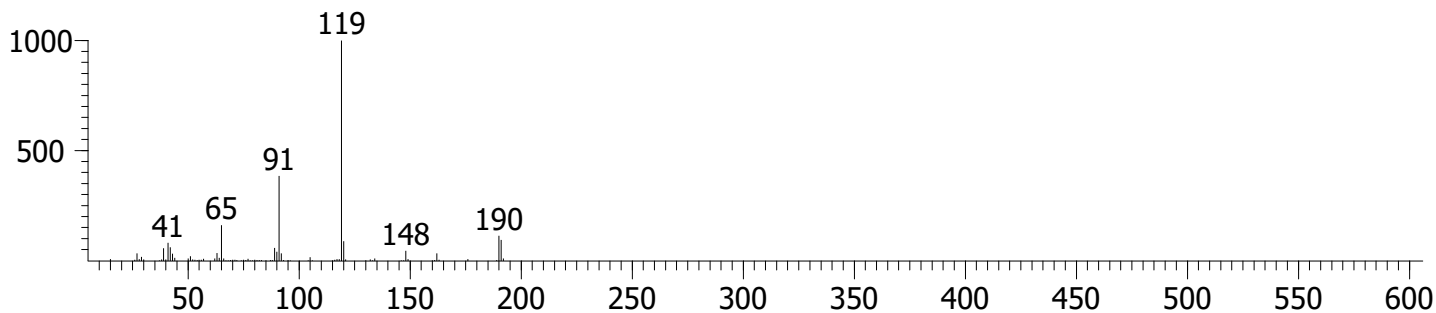

| Hit | Name                                   | Similarity | Probability | CAS      | Library | Formula                            | Weight |
|-----|----------------------------------------|------------|-------------|----------|---------|------------------------------------|--------|
| 1   | Benzamide, 3-methyl-N-methyl-N-propyl- | 930        | 2900        | 0-00-0   | mainlib | C <sub>12</sub> H <sub>17</sub> NO | 191    |
| 2   | Diethyltoluamide                       | 930        | 6970        | 134-62-3 | replib  | C <sub>12</sub> H <sub>17</sub> NO | 191    |
| 3   | Diethyltoluamide                       | 916        | 6970        | 134-62-3 | replib  | C <sub>12</sub> H <sub>17</sub> NO | 191    |
| 4   | Diethyltoluamide                       | 910        | 6970        | 134-62-3 | replib  | C <sub>12</sub> H <sub>17</sub> NO | 191    |
| 5   | Diethyltoluamide                       | 892        | 6970        | 134-62-3 | replib  | C <sub>12</sub> H <sub>17</sub> NO | 191    |

Cyclohexanecarboxamide,  
N-ethyl-5-methyl-2-(1-methylethyl)-

1st Dimension R.T. = 1378.99  
 2nd Dimension R.T. = 1.696  
 Quant Mass(es) = 100  
 S/N = 7867.3  
 Area = 1399039  
 Height = 134357  
 Similarity = 884

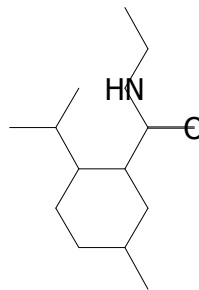

Peak Apex - sample "AnBxr B (20191121):1", peak 4328, at 1378.99 , 1.696 sec , sec (Spec # 136467)

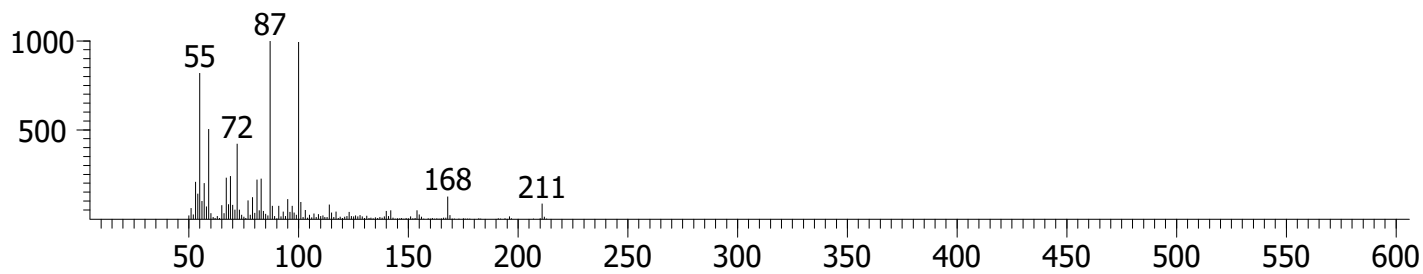

Peak True - sample "AnBxr B (20191121):1", peak 4328, at 1378.99 , 1.696 sec , sec (Spec # 136467)

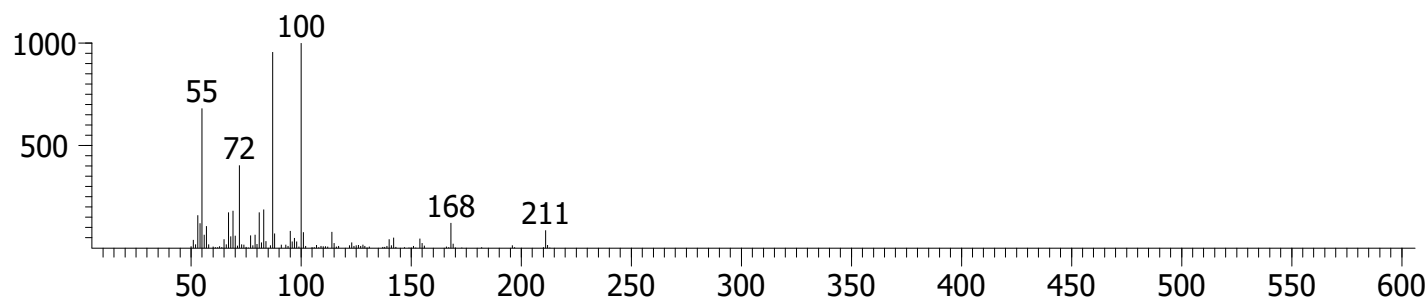

Library Hit - similarity 884, "Cyclohexanecarboxamide, N-ethyl-5-methyl-2-(1-methylethyl)-"

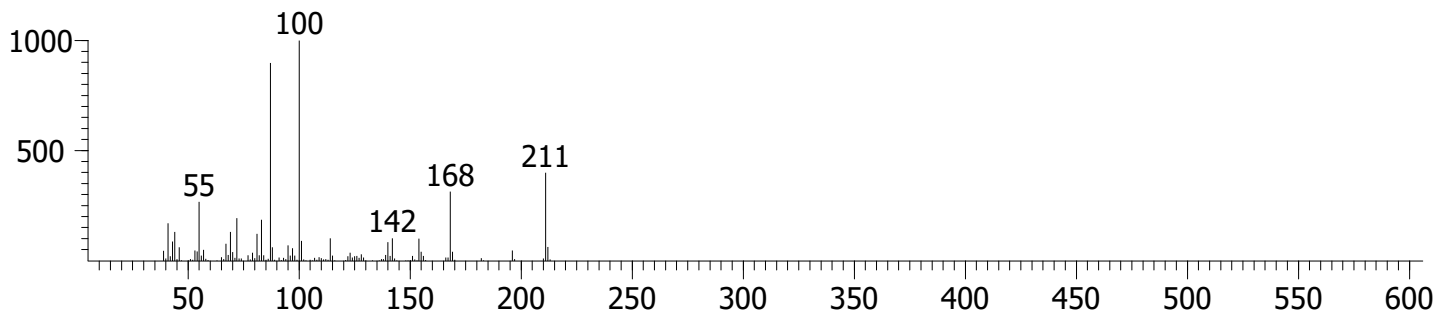

| Hit | Name                                                        | Similarity | Probability | CAS        | Library | Formula  | Weight |
|-----|-------------------------------------------------------------|------------|-------------|------------|---------|----------|--------|
| 1   | Cyclohexanecarboxamide, N-ethyl-5-methyl-2-(1-methylethyl)- | 884        | 9193        | 39711-79-0 | mainlib | C13H25NO | 211    |
| 2   | 2-Decanone, O-methyloxime                                   | 699        | 147         | 36382-61-3 | mainlib | C11H23NO | 185    |
| 3   | Propanamide, 3-cyclopentyl-N-ethyl-                         | 689        | 103         | 0-00-0     | mainlib | C10H19NO | 169    |
| 4   | Non-7-enoic acid, dimethylamide                             | 682        | 79          | 0-00-0     | mainlib | C11H21NO | 183    |
| 5   | 2-Nonanone, O-methyloxime                                   | 680        | 73          | 56292-72-9 | mainlib | C10H21NO | 171    |

## 2-(Methylmercapto)benzothiazole

1st Dimension R.T. = 1399.97  
2nd Dimension R.T. = 2.277  
Quant Mass(es) = 181  
S/N = 6676.1  
Area = 1218083  
Height = 122667  
Similarity = 961

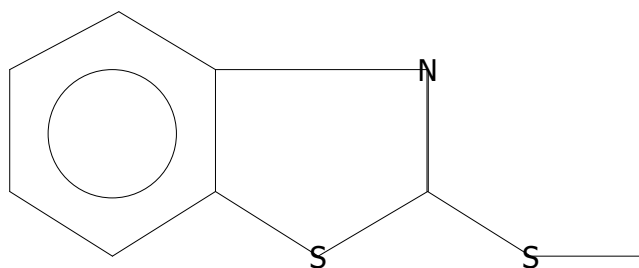

Peak Apex - sample "AnBxr B (20191121):1", peak 4485, at 1399.97 , 2.277 sec , sec (Spec # 139735)

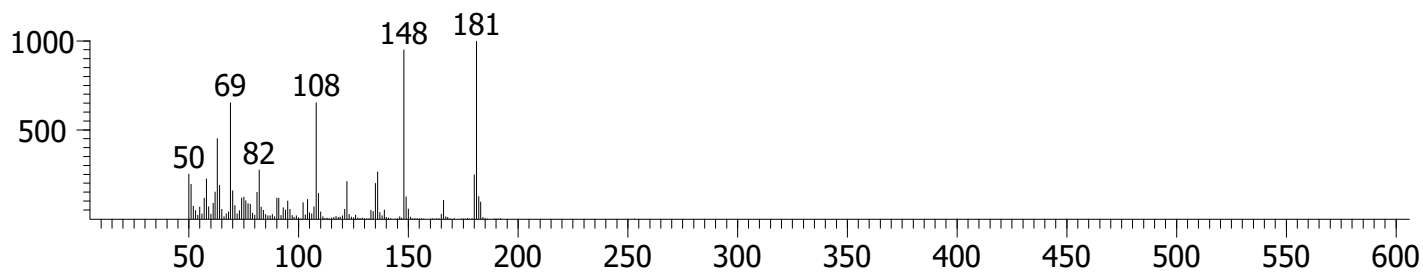

Peak True - sample "AnBxr B (20191121):1", peak 4485, at 1399.97 , 2.277 sec , sec (Spec # 139735)

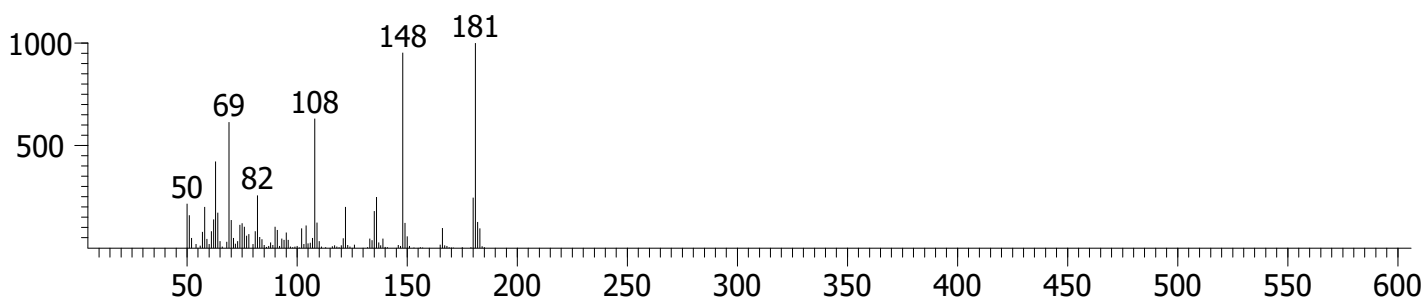

Library Hit - similarity 961, "2-(Methylmercapto)benzothiazole"

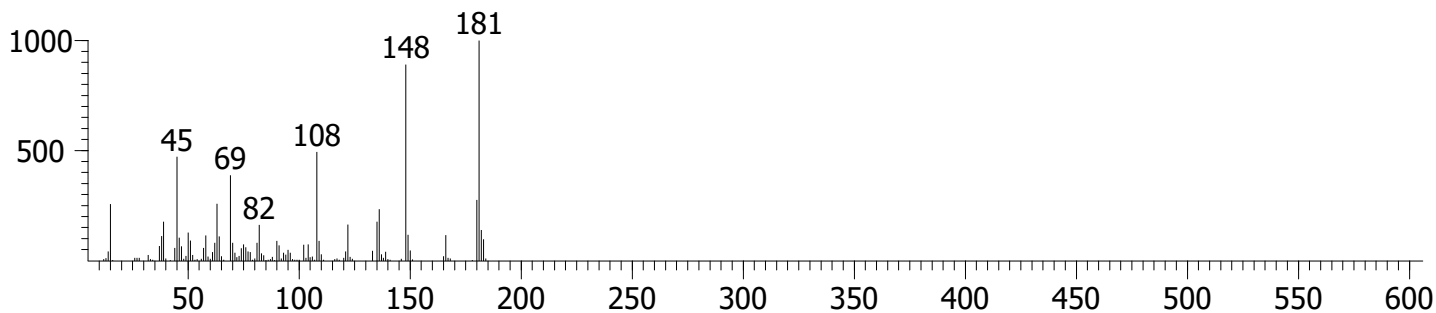

| Hit | Name                                | Similarity | Probability | CAS        | Library | Formula                                       | Weight |
|-----|-------------------------------------|------------|-------------|------------|---------|-----------------------------------------------|--------|
| 1   | 2-(Methylmercapto)benzothiazole     | 961        | 9614        | 615-22-5   | replib  | C <sub>8</sub> H <sub>7</sub> NS <sub>2</sub> | 181    |
| 2   | 2-(Methylmercapto)benzothiazole     | 926        | 9614        | 615-22-5   | replib  | C <sub>8</sub> H <sub>7</sub> NS <sub>2</sub> | 181    |
| 3   | 2-(Methylmercapto)benzothiazole     | 905        | 7110        | 615-22-5   | mainlib | C <sub>8</sub> H <sub>7</sub> NS <sub>2</sub> | 181    |
| 4   | 2-(Methylmercapto)benzothiazole     | 900        | 9614        | 615-22-5   | replib  | C <sub>8</sub> H <sub>7</sub> NS <sub>2</sub> | 181    |
| 5   | 2-(Methylthio)phenyl isothiocyanate | 870        | 1784        | 51333-75-6 | mainlib | C <sub>8</sub> H <sub>7</sub> NS <sub>2</sub> | 181    |



# Cinnamaldehyde, à-pentyl-

1st Dimension R.T. = 1434.95

2nd Dimension R.T. = 1.762

Quant Mass(es) = 129

S/N = 809.57

Area = 172502

Height = 15004

Similarity = 788

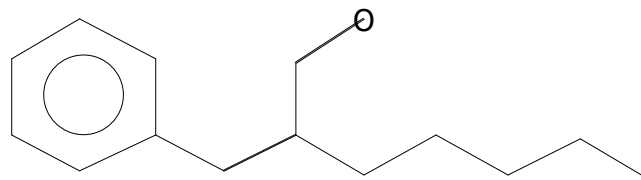

Peak Apex - sample "AnBxr B (20191121):1", peak 4727, at 1434.95 , 1.762 sec , sec (Spec # 144957)

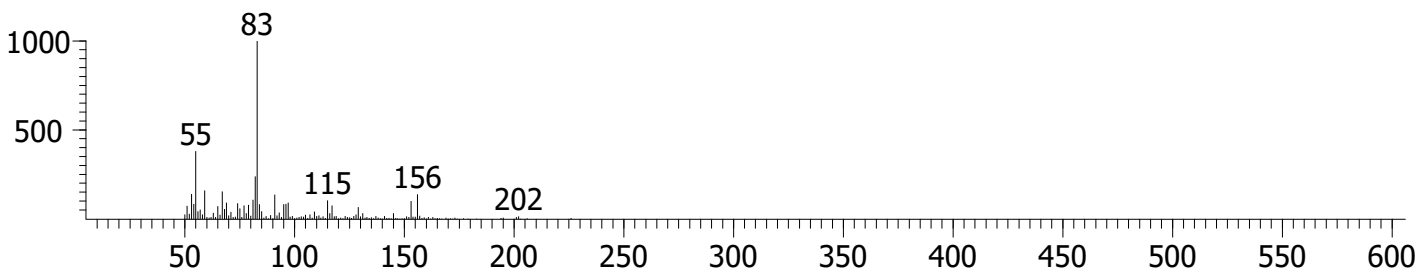

Peak True - sample "AnBxr B (20191121):1", peak 4727, at 1434.95 , 1.762 sec , sec (Spec # 144957)

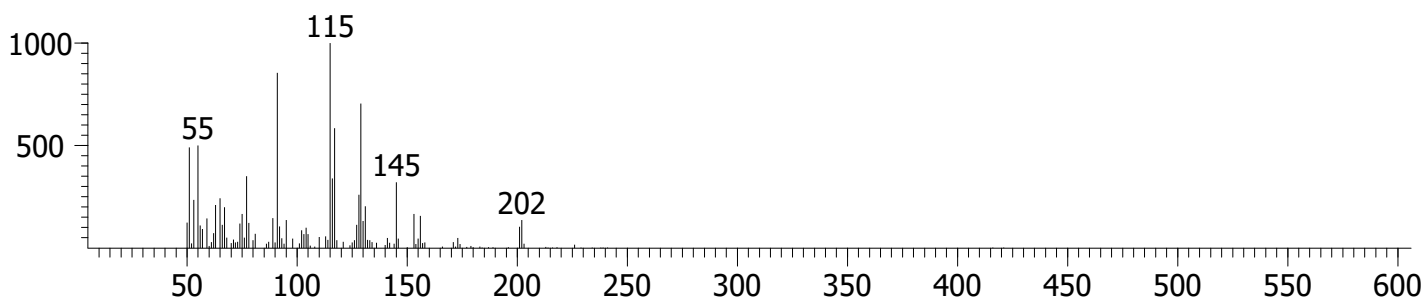

Library Hit - similarity 788, "Cinnamaldehyde, à-pentyl-"

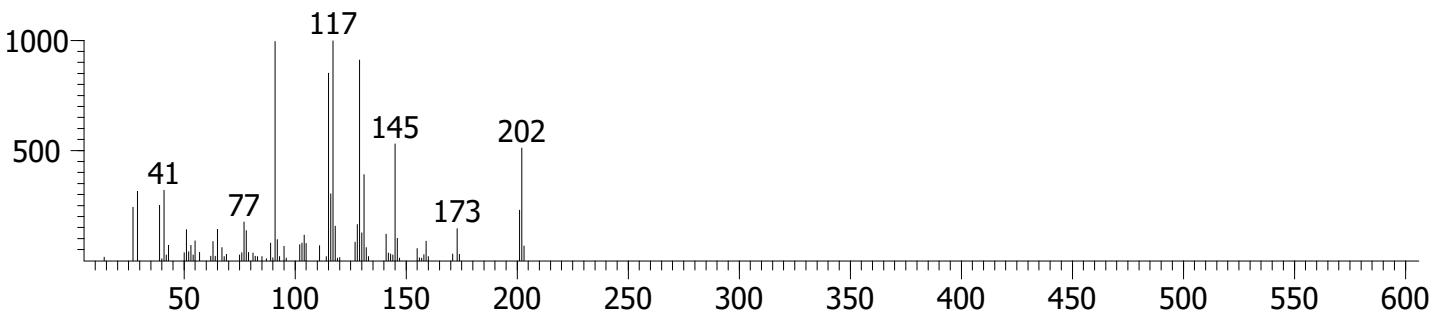

| Hit | Name                          | Similarity | Probability | CAS        | Library | Formula | Weight |
|-----|-------------------------------|------------|-------------|------------|---------|---------|--------|
| 1   | Cinnamaldehyde, à-pentyl-     | 788        | 6899        | 122-40-7   | replib  | C14H18O | 202    |
| 2   | Cinnamaldehyde, à-pentyl-     | 775        | 6899        | 122-40-7   | replib  | C14H18O | 202    |
| 3   | Cinnamaldehyde, à-pentyl-     | 771        | 6899        | 122-40-7   | replib  | C14H18O | 202    |
| 4   | Octanal, 2-(phenylmethylene)- | 735        | 1364        | 101-86-0   | replib  | C15H20O | 216    |
| 5   | 5-APDI                        | 729        | 1072        | 13396-94-6 | replib  | C12H17N | 175    |

### 3-Butylisobenzofuran-1(3H)-one

1st Dimension R.T. = 1452.44  
2nd Dimension R.T. = 2.039  
Quant Mass(es) = 133  
S/N = 1292.5  
Area = 559233  
Height = 51885  
Similarity = 887

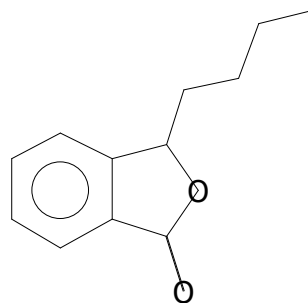

Peak Apex - sample "AnBxr B (20191121):1", peak 4839, at 1452.44 , 2.039 sec , sec (Spec # 147649)

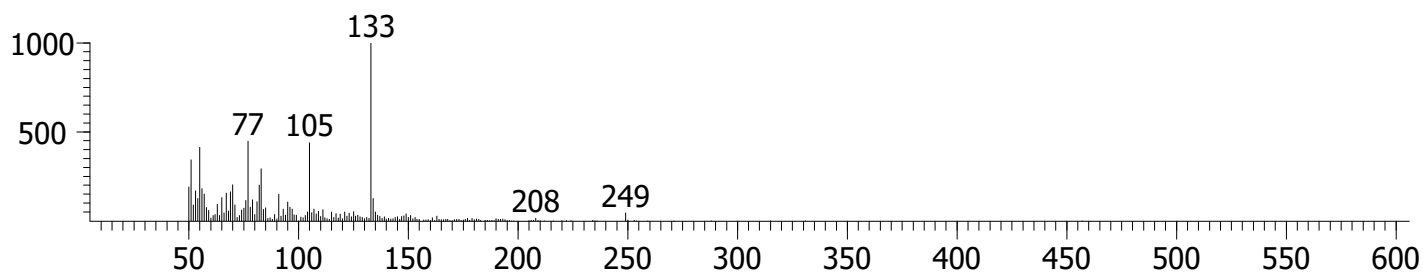

Peak True - sample "AnBxr B (20191121):1", peak 4839, at 1452.44 , 2.039 sec , sec (Spec # 147649)

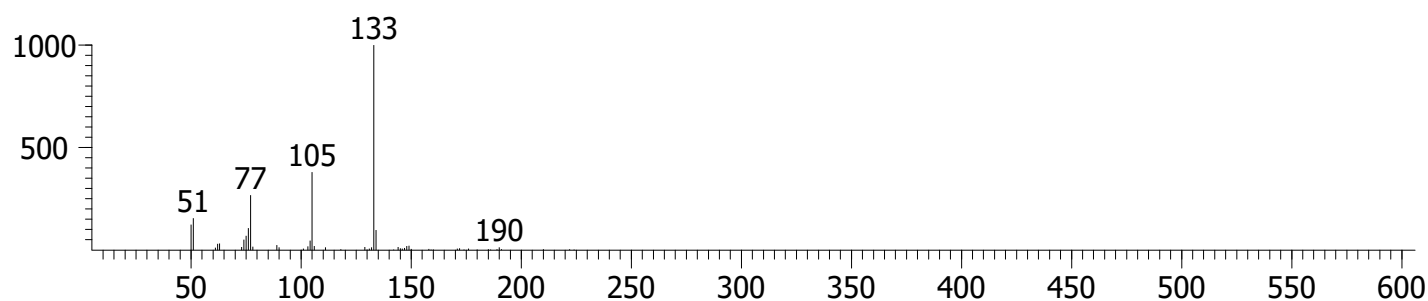

Library Hit - similarity 887, "3-Butylisobenzofuran-1(3H)-one"

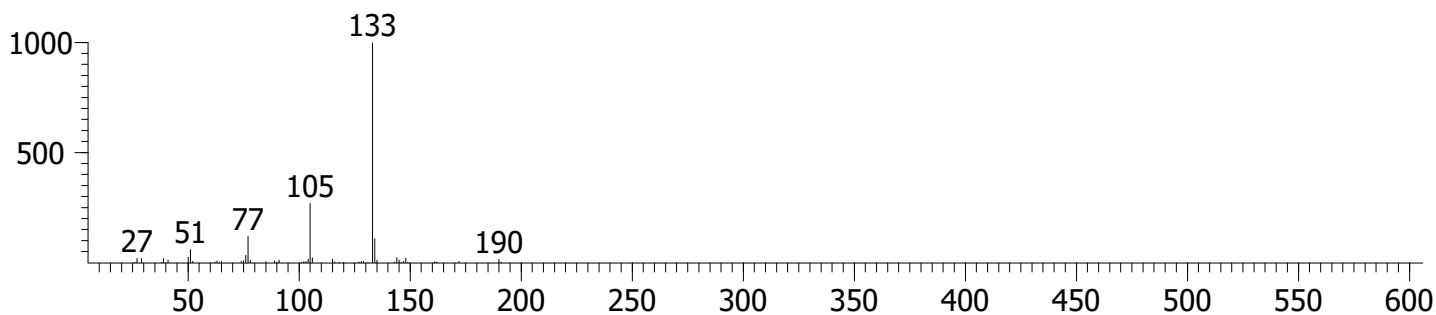

| Hit | Name                                                                         | Similarity | Probability | CAS         | Library   | Formula                                                       | Weight |
|-----|------------------------------------------------------------------------------|------------|-------------|-------------|-----------|---------------------------------------------------------------|--------|
| 1   | 3-Butylisobenzofuran-1(3H)-one                                               | 887        | 3660        | 6066-49-5   | mainlib   | C <sub>12</sub> H <sub>14</sub> O <sub>2</sub>                | 190    |
| 2   | 3-Butylisobenzofuran-1(3H)-one                                               | 884        | 7482        | 6066-49-5   | replib    | C <sub>12</sub> H <sub>14</sub> O <sub>2</sub>                | 190    |
| 3   | Benzoic acid, 4-formyl-, 4-nitrophenyl(ester)                                | 853        | 938         | 131266-90-5 | mainlib   | C <sub>14</sub> H <sub>9</sub> NO <sub>5</sub>                | 271    |
| 4   | Scopoletin                                                                   | 838        | 6425        | 92-61-5     | nist_msms | C <sub>10</sub> H <sub>8</sub> O <sub>4</sub>                 | 192    |
| 5   | Furazan-3-carboxylic acid, 4-amino-, 2-(2,5-dimethylphenyl)-2-oxoethyl ester | 836        | 512         | 296244-74-1 | mainlib   | C <sub>13</sub> H <sub>13</sub> N <sub>3</sub> O <sub>4</sub> | 275    |

## 2,3,6,7-Tetramethylquinoxaline

1st Dimension R.T. = 1473.43  
2nd Dimension R.T. = 1.993  
Quant Mass(es) = 186  
S/N = 983.37  
Area = 130189  
Height = 13241  
Similarity = 665

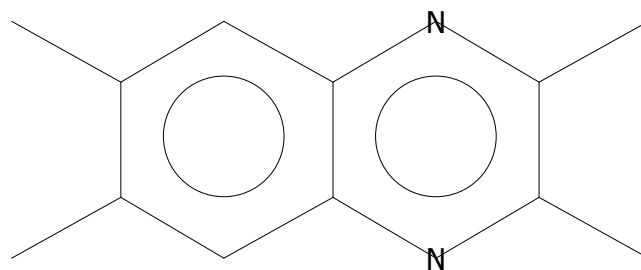

Peak Apex - sample "AnBxr B (20191121):1", peak 4967, at 1473.43 , 1.993 sec , sec (Spec # 150822)

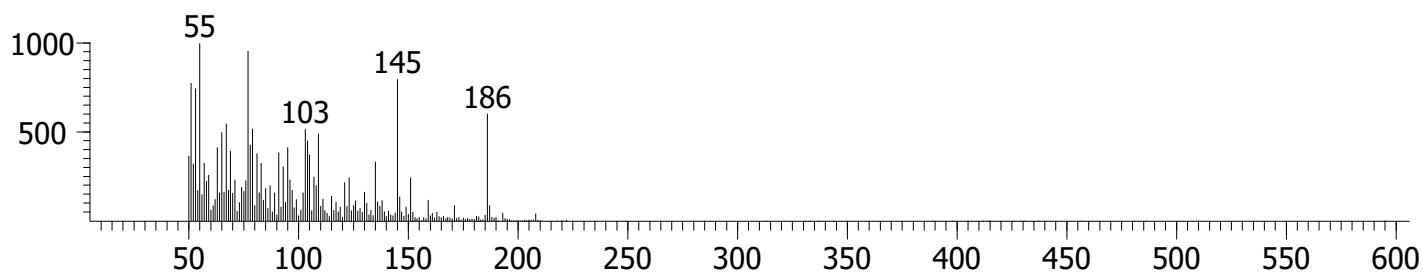

Peak True - sample "AnBxr B (20191121):1", peak 4967, at 1473.43 , 1.993 sec , sec (Spec # 150822)

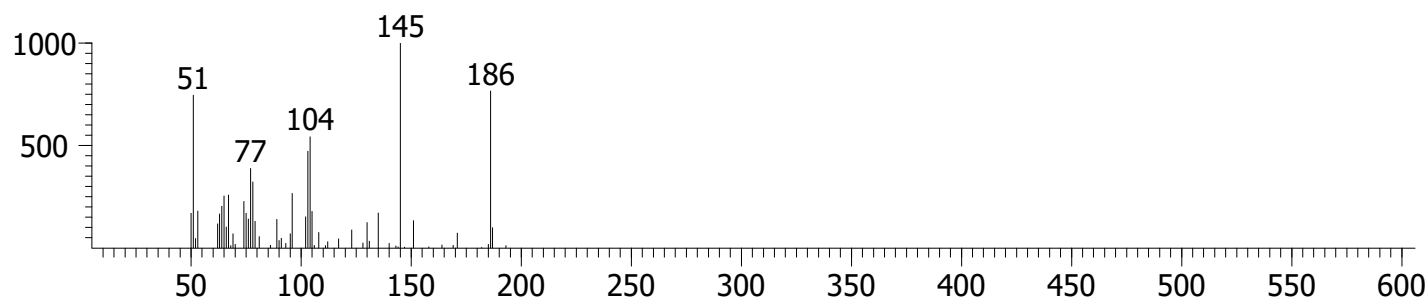

Library Hit - similarity 665, "2,3,6,7-Tetramethylquinoxaline"

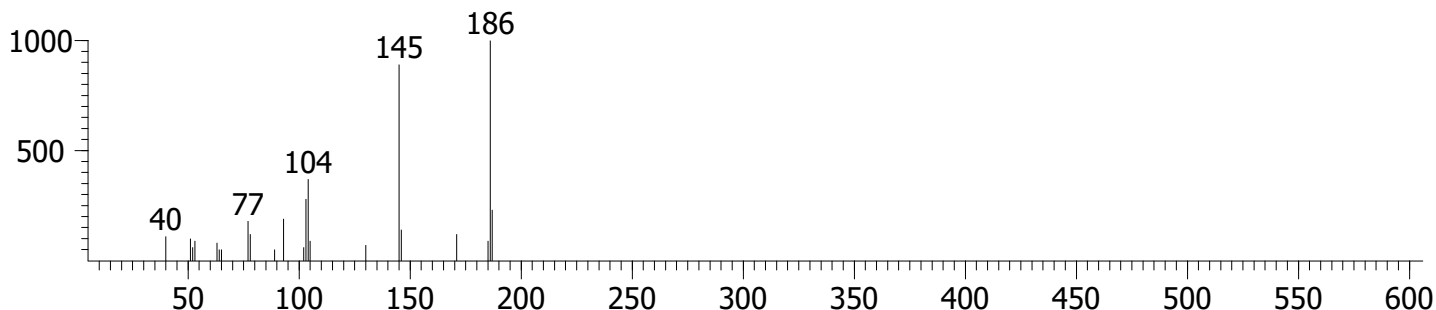

| Hit | Name                                                            | Similarity | Probability | CAS       | Library | Formula     | Weight |
|-----|-----------------------------------------------------------------|------------|-------------|-----------|---------|-------------|--------|
| 1   | 2,3,6,7-Tetramethylquinoxaline                                  | 665        | 5197        | 6957-19-3 | mainlib | C12H14N2    | 186    |
| 2   | Benzenesulfonic acid, 2,5-dimethyl-                             | 593        | 4179        | 609-54-1  | replib  | C8H10O3S    | 186    |
| 3   | Benzenesulfonic acid, 2,5-dimethyl-                             | 570        | 421         | 609-54-1  | mainlib | C8H10O3S    | 186    |
| 4   | Benzeneacetic acid, 4-(5-methyl-1H-1,2,3,4-tetrazol-1-yl)-      | 560        | 297         | 0-00-0    | mainlib | C10H10N4O2  | 218    |
| 5   | 1-Methyl-4-oxo-N-(1,3,4-thiadiazol-2-yl)quinoline-3-carboxamide | 560        | 297         | 0-00-0    | mainlib | C13H10N4O2S | 286    |

## Thymoquinone

1st Dimension R.T. = 1508.41  
2nd Dimension R.T. = 1.921  
Quant Mass(es) = 164  
S/N = 5184.8  
Area = 704966  
Height = 71115  
Similarity = 746

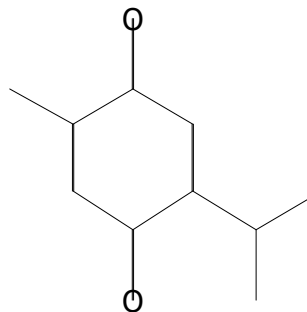

Peak Apex - sample "AnBxr B (20191121):1", peak 5208, at 1508.41 , 1.921 sec , sec (Spec # 156111)

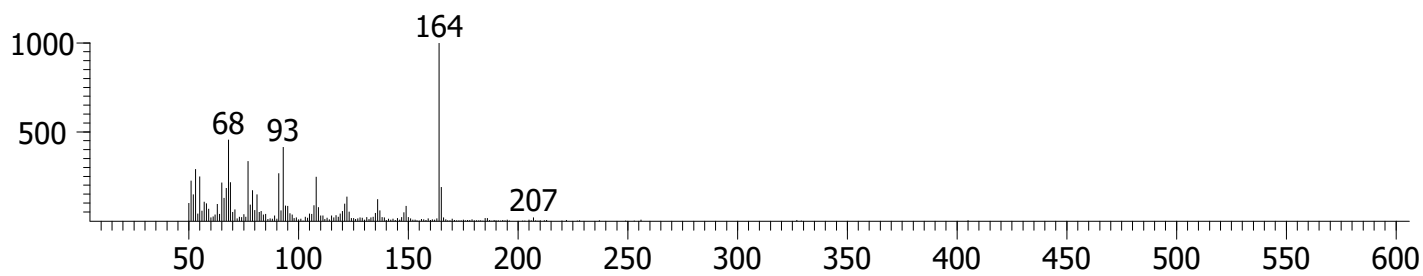

Peak True - sample "AnBxr B (20191121):1", peak 5208, at 1508.41 , 1.921 sec , sec (Spec # 156111)

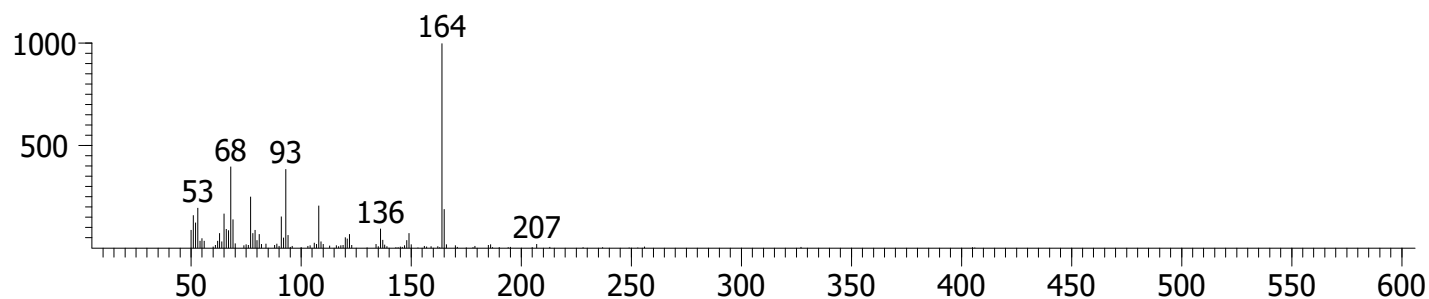

Library Hit - similarity 746, "Thymoquinone"

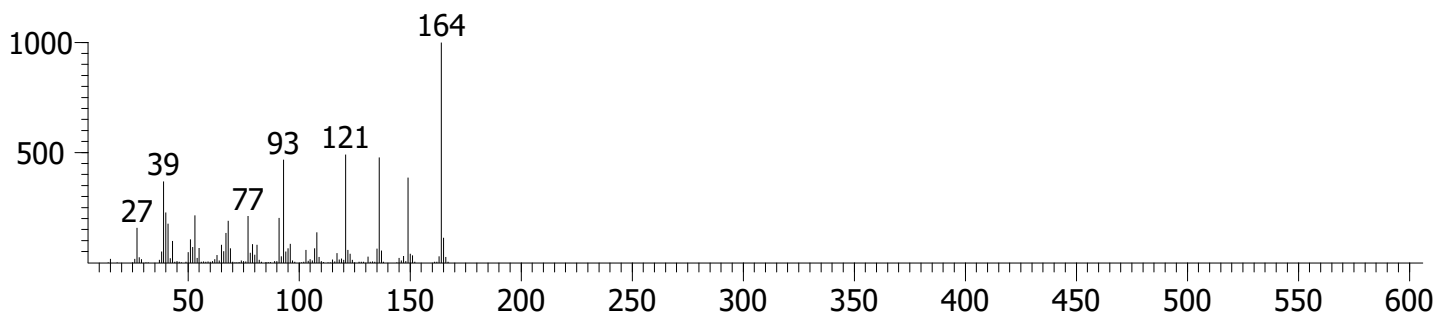

| Hit | Name                                               | Similarity | Probability | CAS        | Library | Formula  | Weight |
|-----|----------------------------------------------------|------------|-------------|------------|---------|----------|--------|
| 1   | Thymoquinone                                       | 746        | 3396        | 490-91-5   | mainlib | C10H12O2 | 164    |
| 2   | Thymoquinone                                       | 743        | 6465        | 490-91-5   | replib  | C10H12O2 | 164    |
| 3   | Thymoquinone                                       | 708        | 6465        | 490-91-5   | replib  | C10H12O2 | 164    |
| 4   | Inden-5(4H)-one, 2,6,7,7a-tetrahydro-4,4-dimethyl- | 697        | 697         | 18366-35-3 | mainlib | C11H16O  | 164    |
| 5   | Tricyclo[3.3.3.0]undecan-3-one                     | 687        | 492         | 83043-47-4 | mainlib | C11H16O  | 164    |

## Benzenepropanenitrile, á-hydroxy-

1st Dimension R.T. = 1529.4  
2nd Dimension R.T. = 2.079  
Quant Mass(es) = 107  
S/N = 123.80  
Area = 334846  
Height = 30950  
Similarity = 783

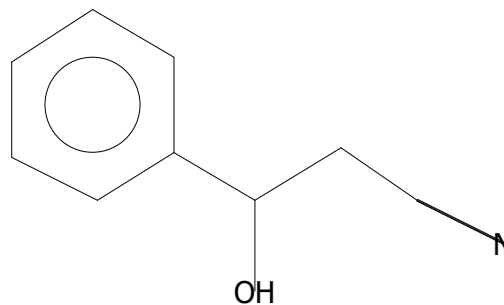

Peak Apex - sample "AnBxr B (20191121):1", peak 5364, at 1529.4 , 2.079 sec , sec (Spec # 159315)

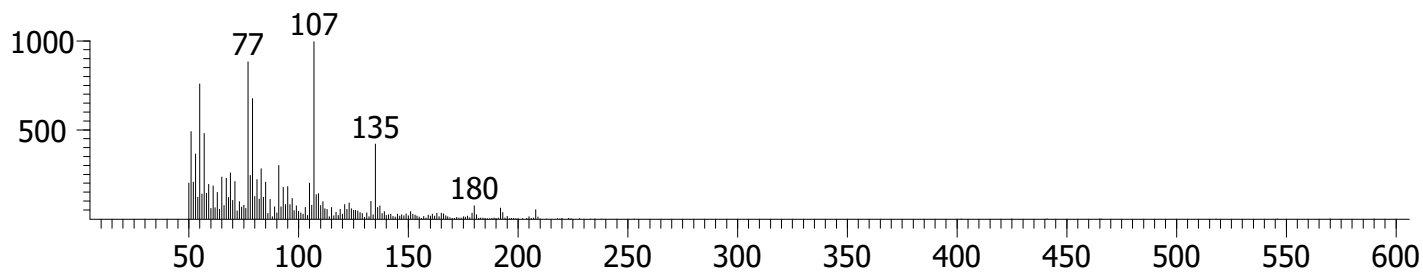

Peak True - sample "AnBxr B (20191121):1", peak 5364, at 1529.4 , 2.079 sec , sec (Spec # 159315)

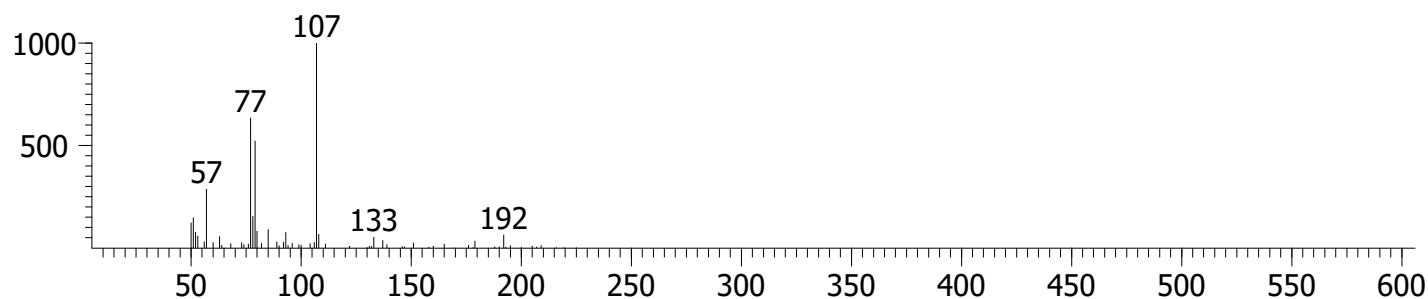

Library Hit - similarity 783, "Benzenepropanenitrile, á-hydroxy-"

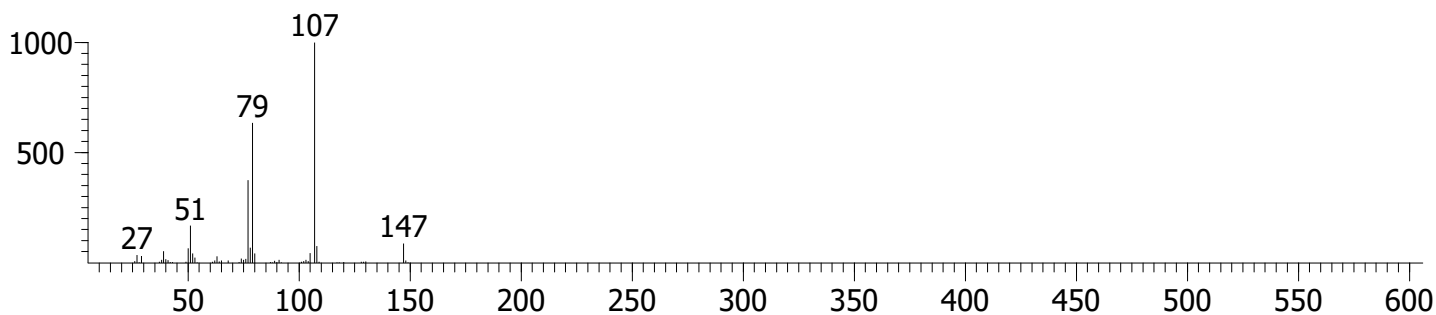

| Hit | Name                                         | Similarity | Probability | CAS        | Library | Formula | Weight |
|-----|----------------------------------------------|------------|-------------|------------|---------|---------|--------|
| 1   | Benzenepropanenitrile, á-hydroxy-            | 783        | 1506        | 17190-29-3 | mainlib | C9H9NO  | 147    |
| 2   | Benzenemethanol, à-(2,2-dimethylpropyl)-     | 780        | 1331        | 62338-03-8 | mainlib | C12H18O | 178    |
| 3   | Benzenemethanol, à-2-propenyl-               | 778        | 1643        | 936-58-3   | replib  | C10H12O | 148    |
| 4   | Mandelic acid                                | 767        | 1127        | 90-64-2    | replib  | C8H8O3  | 152    |
| 5   | Tricyclo[2.2.1.0(1,4)]heptan-2-one, 6-nitro- | 765        | 806         | 56666-50-3 | mainlib | C7H7NO3 | 153    |

## 6-Methylenebicyclo[3.2.0]hept-3-en-2-one

1st Dimension R.T. = 1543.39  
2nd Dimension R.T. = 2.198  
Quant Mass(es) = 120  
S/N = 779.85  
Area = 162959  
Height = 14685  
Similarity = 837

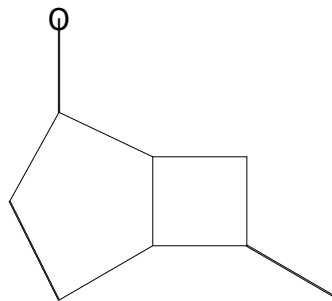

Peak Apex - sample "AnBxr B (20191121):1", peak 5457, at 1543.39 , 2.198 sec , sec (Spec # 161453)

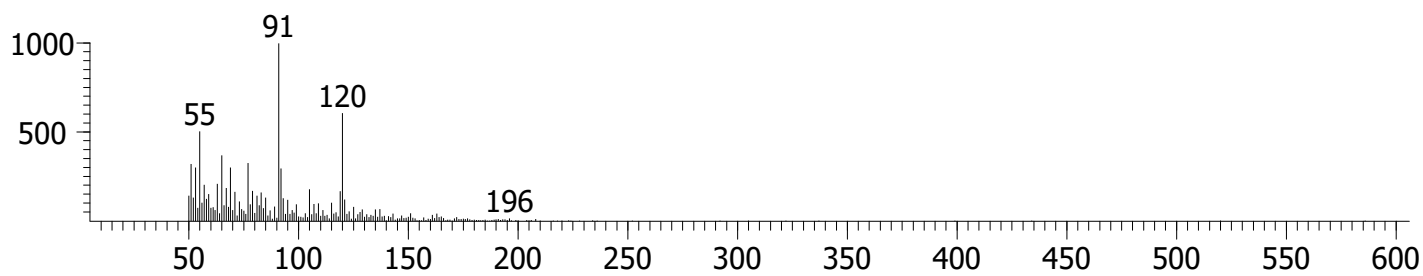

Peak True - sample "AnBxr B (20191121):1", peak 5457, at 1543.39 , 2.198 sec , sec (Spec # 161453)

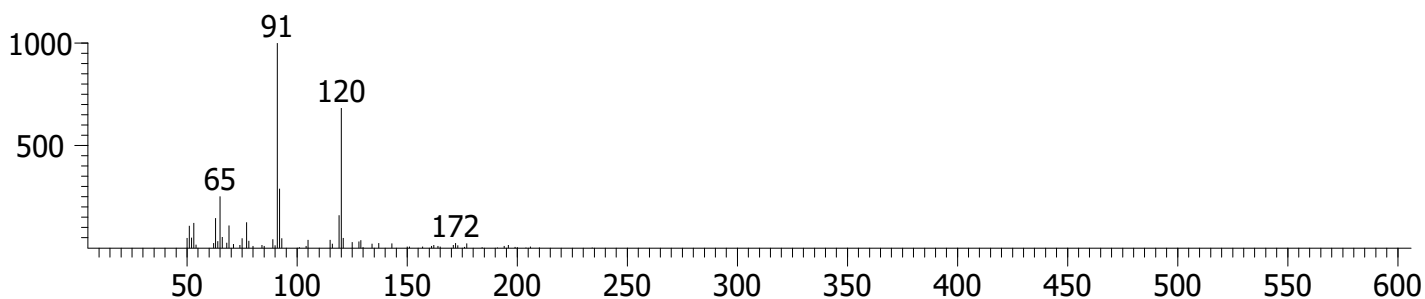

Library Hit - similarity 837, "6-Methylenebicyclo[3.2.0]hept-3-en-2-one"

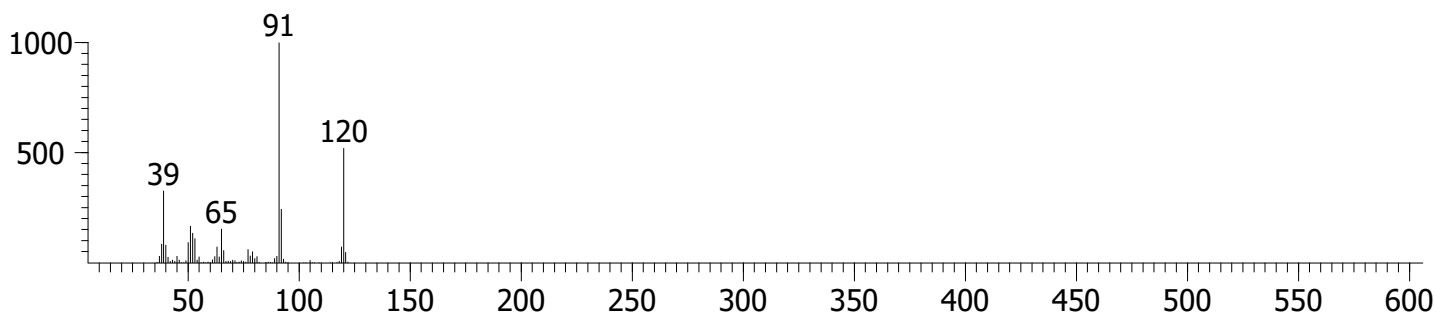

| Hit | Name                                     | Similarity | Probability | CAS      | Library | Formula | Weight |
|-----|------------------------------------------|------------|-------------|----------|---------|---------|--------|
| 1   | 6-Methylenebicyclo[3.2.0]hept-3-en-2-one | 837        | 5201        | 0-00-0   | mainlib | C8H8O   | 120    |
| 2   | 4,5-Dihydro-2(1H)-pentalenone            | 815        | 2056        | 0-00-0   | mainlib | C8H8O   | 120    |
| 3   | Benzeneacetaldehyde                      | 806        | 4696        | 122-78-1 | replib  | C8H8O   | 120    |
| 4   | Phthalan                                 | 768        | 1125        | 496-14-0 | replib  | C8H8O   | 120    |
| 5   | Benzeneacetaldehyde                      | 768        | 4696        | 122-78-1 | replib  | C8H8O   | 120    |

## 9H-Fluoren-9-ol

1st Dimension R.T. = 1557.38  
2nd Dimension R.T. = 2.317  
Quant Mass(es) = 181  
S/N = 779.98  
Area = 185039  
Height = 14618  
Similarity = 878

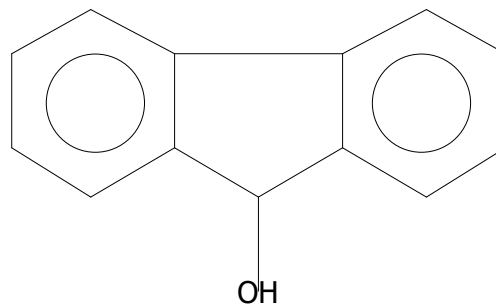

Peak Apex - sample "AnBxr B (20191121):1", peak 5565, at 1557.38 , 2.317 sec , sec (Spec # 163591)

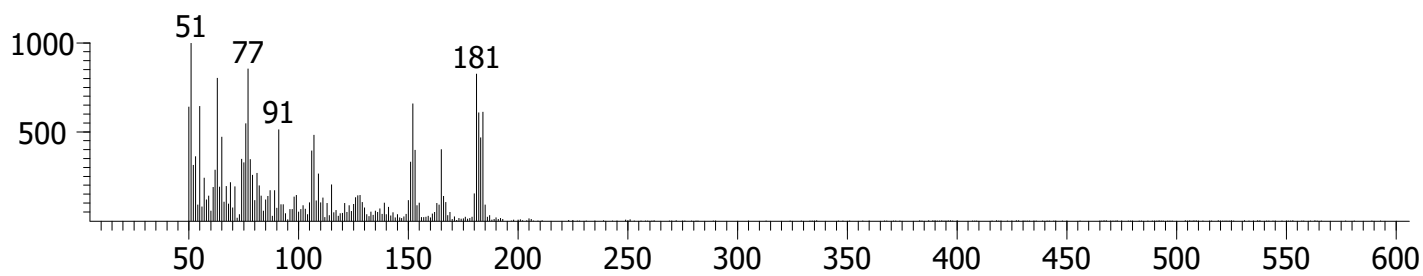

Peak True - sample "AnBxr B (20191121):1", peak 5565, at 1557.38 , 2.317 sec , sec (Spec # 163591)

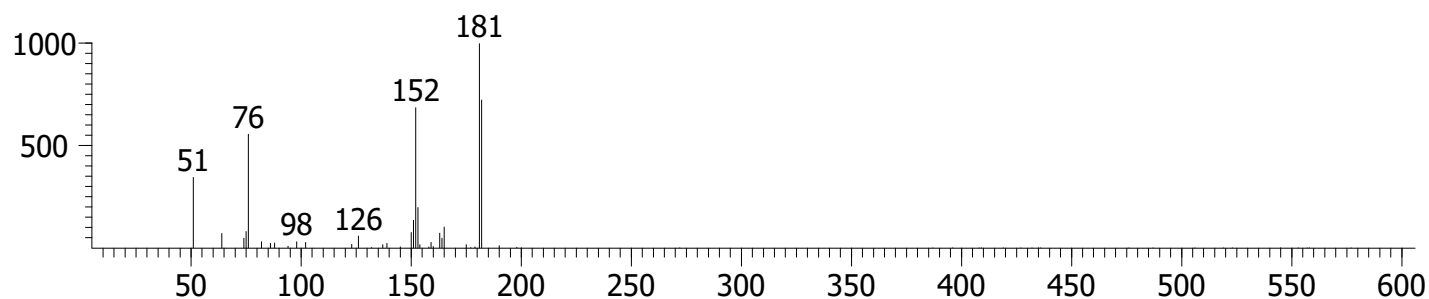

Library Hit - similarity 878, "9H-Fluoren-9-ol"

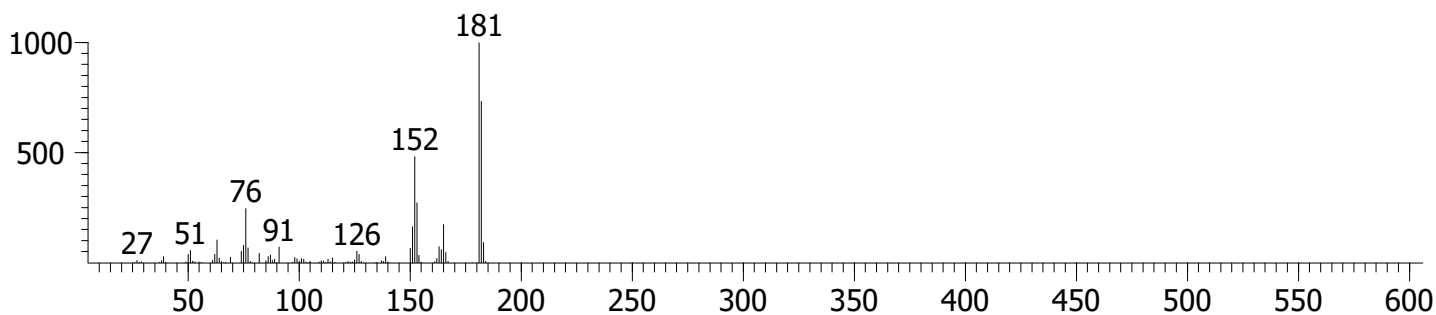

| Hit | Name                 | Similarity | Probability | CAS       | Library | Formula | Weight |
|-----|----------------------|------------|-------------|-----------|---------|---------|--------|
| 1   | 9H-Fluoren-9-ol      | 878        | 7633        | 1689-64-1 | replib  | C13H10O | 182    |
| 2   | 9H-Fluoren-9-ol      | 839        | 7633        | 1689-64-1 | replib  | C13H10O | 182    |
| 3   | 6H-Dibenzo[b,d]pyran | 819        | 3355        | 229-95-8  | mainlib | C13H10O | 182    |
| 4   | 9H-Fluoren-9-ol      | 808        | 7633        | 1689-64-1 | replib  | C13H10O | 182    |
| 5   | 9H-Xanthene          | 804        | 1016        | 92-83-1   | replib  | C13H10O | 182    |

# 4S,9aS)-4-Allyl-1-ethyloctahydro-1H-quinoli:

1st Dimension R.T. = 1578.37

2nd Dimension R.T. = 1.967

Quant Mass(es) = 166

S/N = 2407.2

Area = 416015

Height = 38020

Similarity = 759

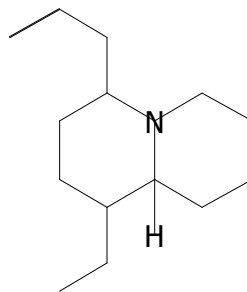

Peak Apex - sample "AnBxr B (20191121):1", peak 5695, at 1578.37 , 1.967 sec , sec (Spec # 166718)

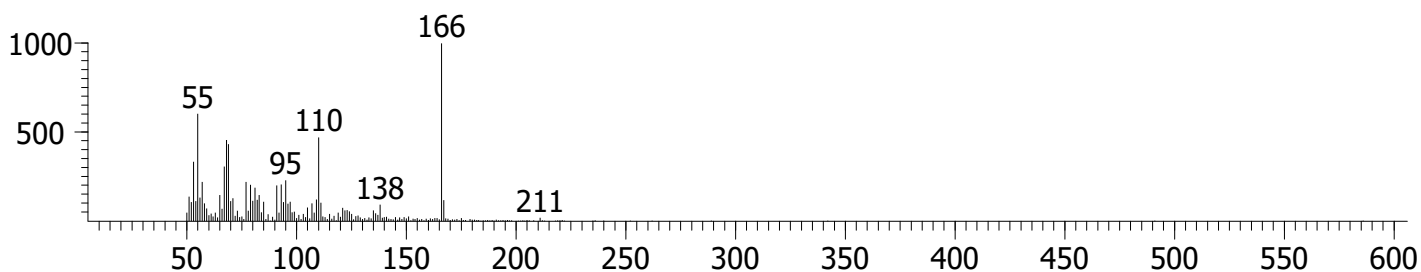

Peak True - sample "AnBxr B (20191121):1", peak 5695, at 1578.37 , 1.967 sec , sec (Spec # 166718)

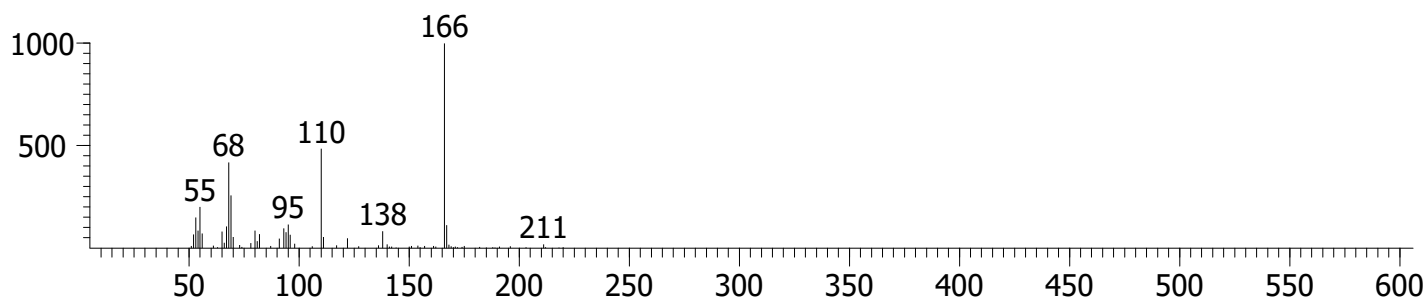

Library Hit - similarity 759, "(1S,4S,9aS)-4-Allyl-1-ethyloctahydro-1H-quinoline"

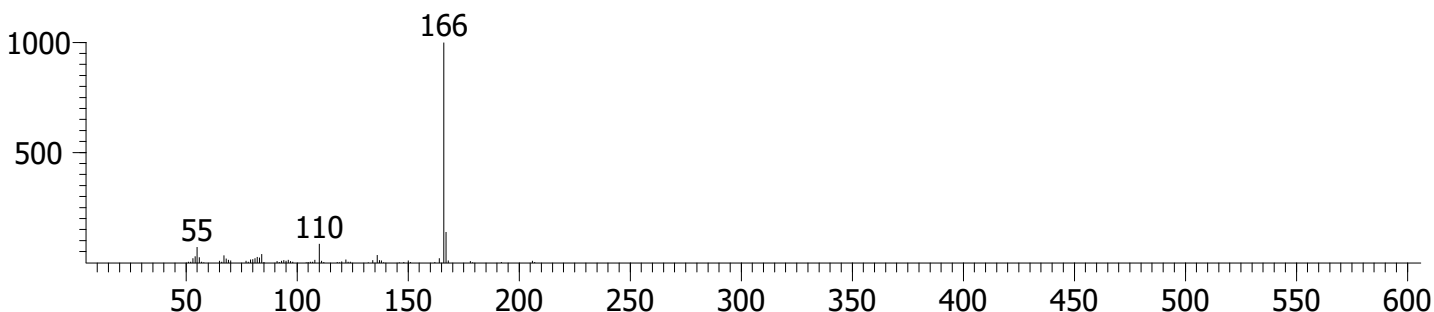

| Hit | Name                                                                          | Similarity | Probability | CAS         | Library | Formula   | Weight |
|-----|-------------------------------------------------------------------------------|------------|-------------|-------------|---------|-----------|--------|
| 1   | (1S,4S,9aS)-4-Allyl-1-ethyloctahydro-1H-quinoline                             | 759        | 1565        | 151805-12-8 | mainlib | C14H25N   | 207    |
| 2   | (1R,4R,9aS)-1-Ethyl-4-(pent-4-en-1-yl)octahydro-1H-quinoline                  | 758        | 1504        | 957792-07-3 | mainlib | C16H29N   | 235    |
| 3   | 2,7(1H,3H)-Naphthalenedione, hexahydro-                                       | 740        | 775         | 46048-64-0  | mainlib | C10H14O2  | 166    |
| 4   | Imidazo[4,5-e][1,4]diazepine-5,8-dione, 1,4,6,7-tetrahydro-                   | 738        | 715         | 119584-65-5 | mainlib | C6H6N4O2  | 166    |
| 5   | 1-Aminocyclopentanecarboxylic acid, n-propargyloxycarbonyl-, pentadecyl ester | 729        | 519         | 0-00-0      | mainlib | C25H43NO4 | 421    |



## Benzhydryl isothiocyanate

1st Dimension R.T. = 1655.33  
2nd Dimension R.T. = 2.435  
Quant Mass(es) = 167  
S/N = 5006.8  
Area = 1232115  
Height = 103275  
Similarity = 915

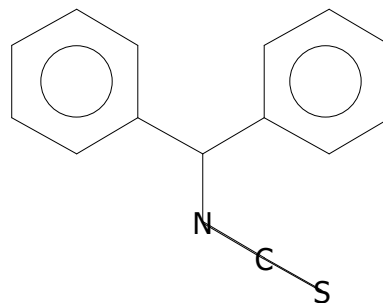

Peak Apex - sample "AnBxr B (20191121):1", peak 6182, at 1655.33 , 2.435 sec , sec (Spec # 178449)

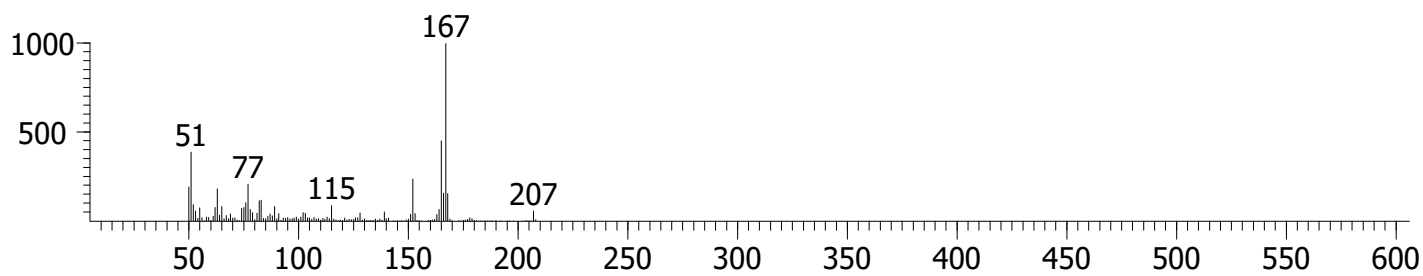

Peak True - sample "AnBxr B (20191121):1", peak 6182, at 1655.33 , 2.435 sec , sec (Spec # 178449)

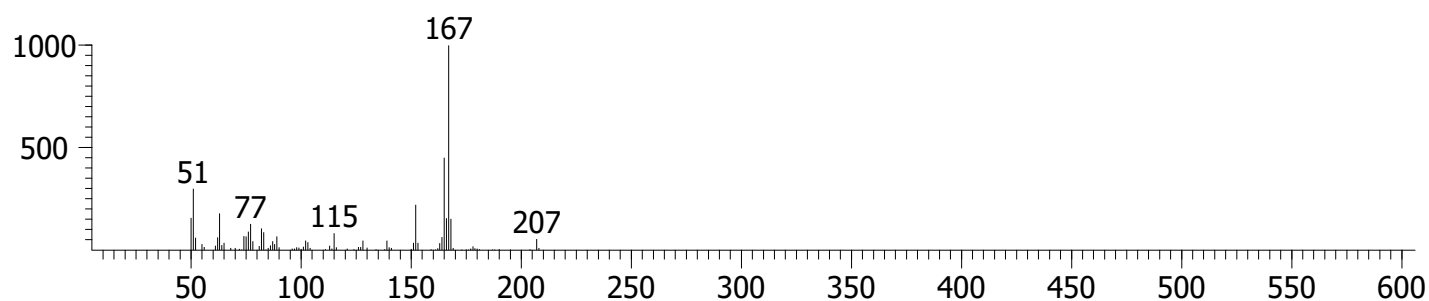

Library Hit - similarity 915, "Benzhydryl isothiocyanate"

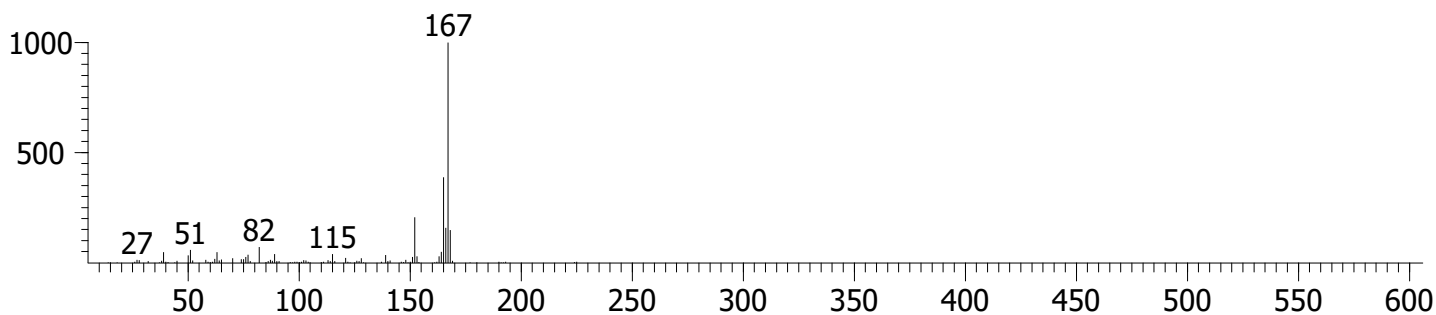

| Hit | Name                                      | Similarity | Probability | CAS        | Library | Formula  | Weight |
|-----|-------------------------------------------|------------|-------------|------------|---------|----------|--------|
| 1   | Benzhydryl isothiocyanate                 | 915        | 1787        | 3550-21-8  | mainlib | C14H11NS | 225    |
| 2   | Benzene, 1,1'-[(methylthio)methylene]bis- | 911        | 1510        | 15733-08-1 | mainlib | C14H14S  | 214    |
| 3   | 2-Propanone, 1,1-diphenyl-                | 907        | 1276        | 781-35-1   | mainlib | C15H14O  | 210    |
| 4   | Benzenepropanenitrile, $\alpha$ -phenyl-  | 903        | 1077        | 2286-54-6  | mainlib | C15H13N  | 207    |
| 5   | Benzenemethanethiol, $\alpha$ -phenyl-    | 902        | 1652        | 4237-48-3  | replib  | C13H12S  | 200    |

# Amodryl

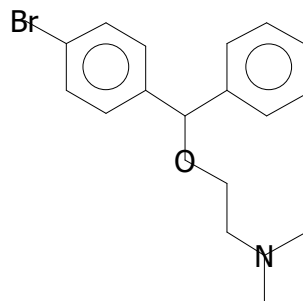

1st Dimension R.T. = 1700.8

2nd Dimension R.T. = 1.960

Quant Mass(es) = 58

S/N = 12379

Area = 14115498

Height = 1127996

Similarity = 938

Peak Apex - sample "AnBxr B (20191121):1", peak 6461, at 1700.8 , 1.960 sec , sec (Spec # 185267)

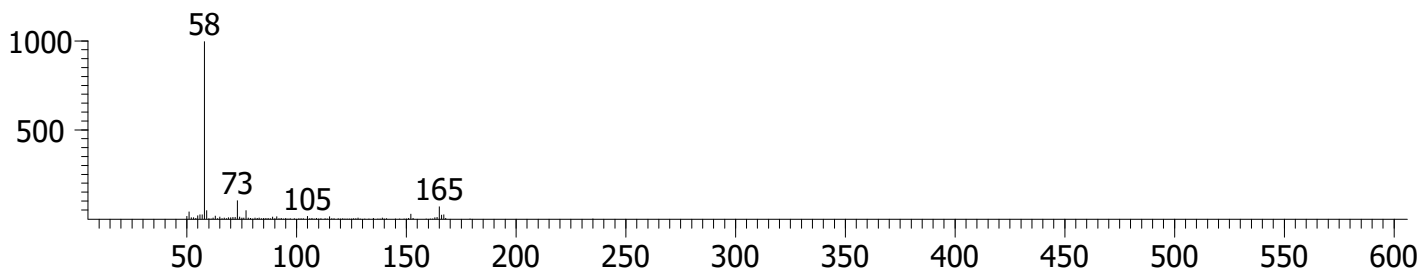

Peak True - sample "AnBxr B (20191121):1", peak 6461, at 1700.8 , 1.960 sec , sec (Spec # 185267)

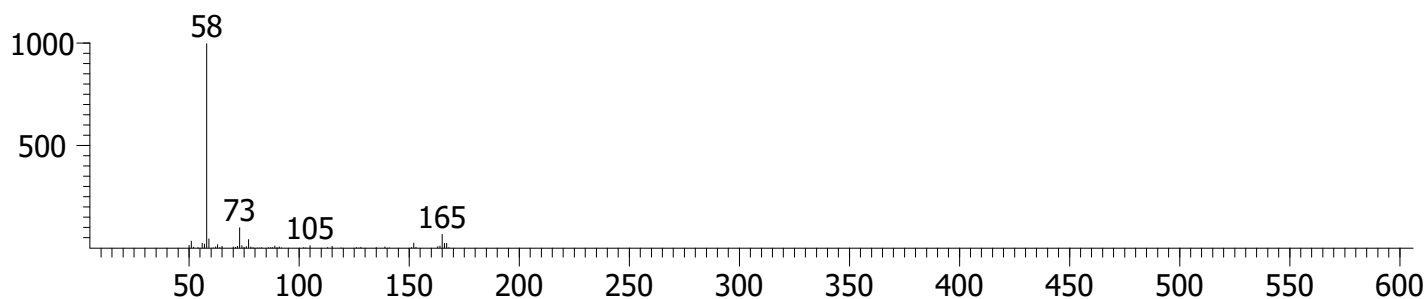

Library Hit - similarity 938, "Amodryl"

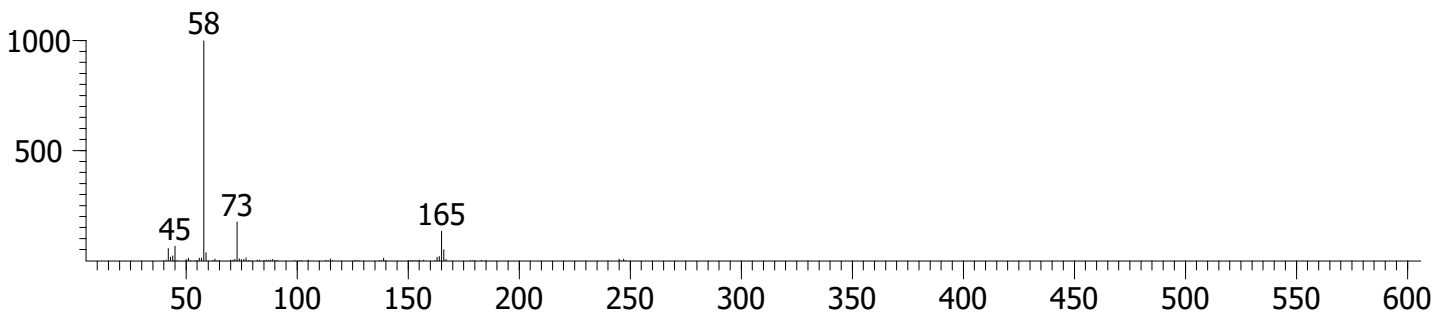

| Hit | Name                             | Similarity | Probability | CAS        | Library | Formula     | Weight |
|-----|----------------------------------|------------|-------------|------------|---------|-------------|--------|
| 1   | Amodryl                          | 938        | 3918        | 118-23-0   | mainlib | C17H20BrNO  | 333    |
| 2   | Orphenadrine                     | 914        | 3665        | 83-98-7    | replib  | C18H23NO    | 269    |
| 3   | Benadryl                         | 905        | 2661        | 58-73-1    | replib  | C17H21NO    | 255    |
| 4   | N,N-Dimethyl-2-phenoxyethylamine | 902        | 968         | 13468-02-5 | mainlib | C10H15NO    | 165    |
| 5   | Tramadol, O-trimethylsilyl-      | 901        | 931         | 0-00-0     | mainlib | C19H33NO2Si | 335    |

## Gemfibrozil

1st Dimension R.T. = 1732.28  
2nd Dimension R.T. = 1.874  
Quant Mass(es) = 122  
S/N = 4396.7  
Area = 1126899  
Height = 123546  
Similarity = 852

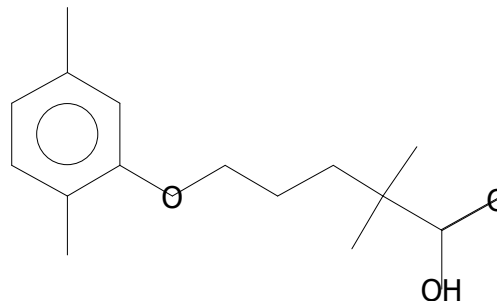

Peak Apex - sample "AnBxr B (20191121):1", peak 6657, at 1732.28 , 1.874 sec , sec (Spec # 190024)

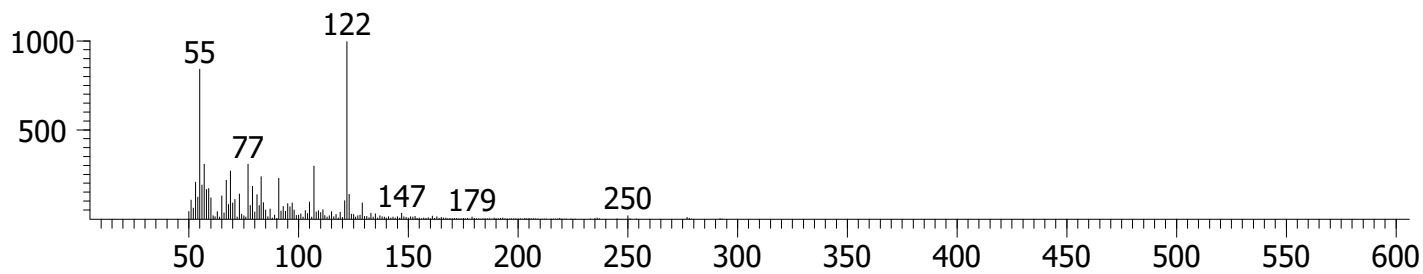

Peak True - sample "AnBxr B (20191121):1", peak 6657, at 1732.28 , 1.874 sec , sec (Spec # 190024)

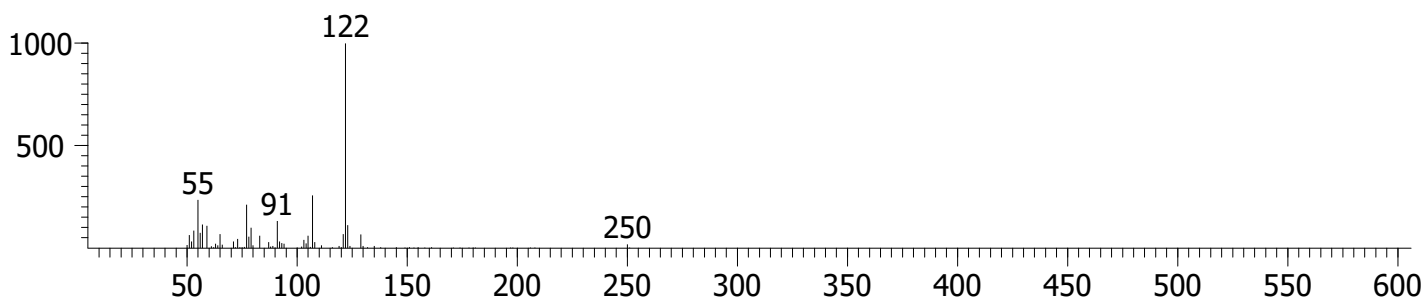

Library Hit - similarity 852, "Gemfibrozil"

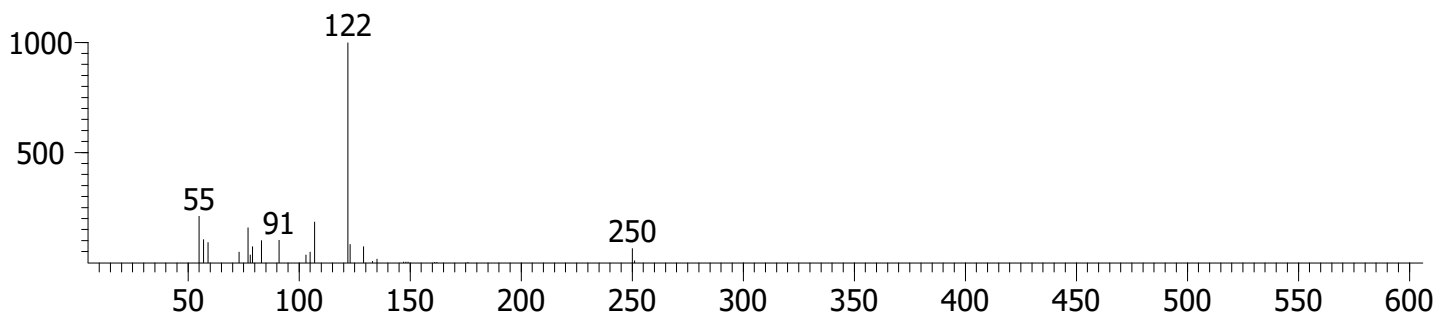

| Hit | Name                                             | Similarity | Probability | CAS        | Library | Formula                                        | Weight |
|-----|--------------------------------------------------|------------|-------------|------------|---------|------------------------------------------------|--------|
| 1   | Gemfibrozil                                      | 852        | 5453        | 25812-30-0 | replib  | C <sub>15</sub> H <sub>22</sub> O <sub>3</sub> | 250    |
| 2   | Gemfibrozil                                      | 829        | 1183        | 25812-30-0 | mainlib | C <sub>15</sub> H <sub>22</sub> O <sub>3</sub> | 250    |
| 3   | Carbonic acid, butyl 3,5-dimethylphenyl ester    | 824        | 953         | 0-00-0     | mainlib | C <sub>13</sub> H <sub>18</sub> O <sub>3</sub> | 222    |
| 4   | butanedioic acid, mono(3,4-dimethylphenyl) ester | 804        | 434         | 0-00-0     | mainlib | C <sub>12</sub> H <sub>14</sub> O <sub>4</sub> | 222    |
| 5   | Carbonic acid, isobutyl 3,5-dimethylphenyl ester | 801        | 383         | 0-00-0     | mainlib | C <sub>13</sub> H <sub>18</sub> O <sub>3</sub> | 222    |

2(5H)-Furanone,  
4-methyl-3,5,5-tris(2-methyl-2-propenyl)-

1st Dimension R.T. = 1739.28  
 2nd Dimension R.T. = 2.059  
 Quant Mass(es) = 205  
 S/N = 2282.2  
 Area = 438028  
 Height = 36577  
 Similarity = 767

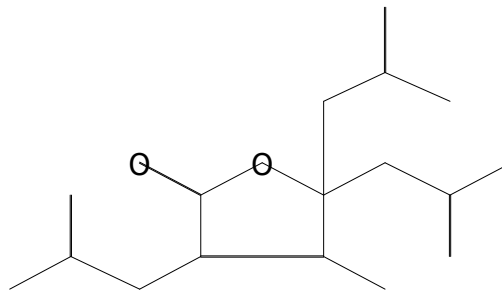

Peak Apex - sample "AnBxr B (20191121):1", peak 6700, at 1739.28 , 2.059 sec , sec (Spec # 191112)

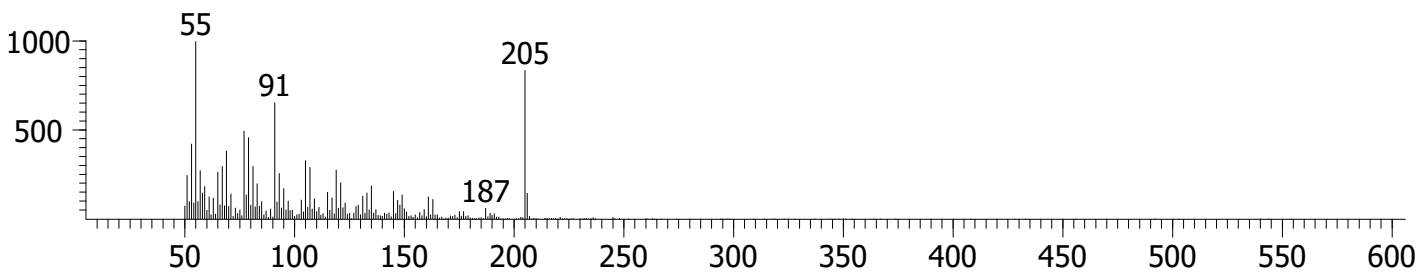

Peak True - sample "AnBxr B (20191121):1", peak 6700, at 1739.28 , 2.059 sec , sec (Spec # 191112)

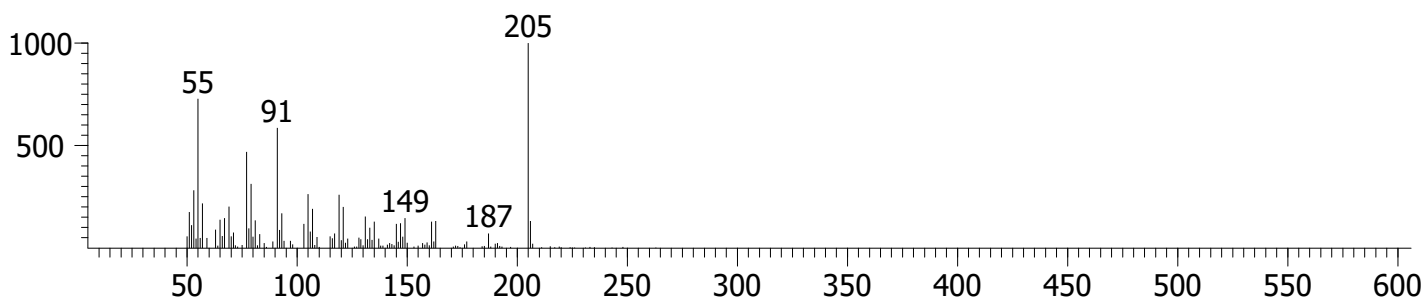

Library Hit - similarity 767, "2(5H)-Furanone, 4-methyl-3,5,5-tris(2-methyl-2-propenyl)-"

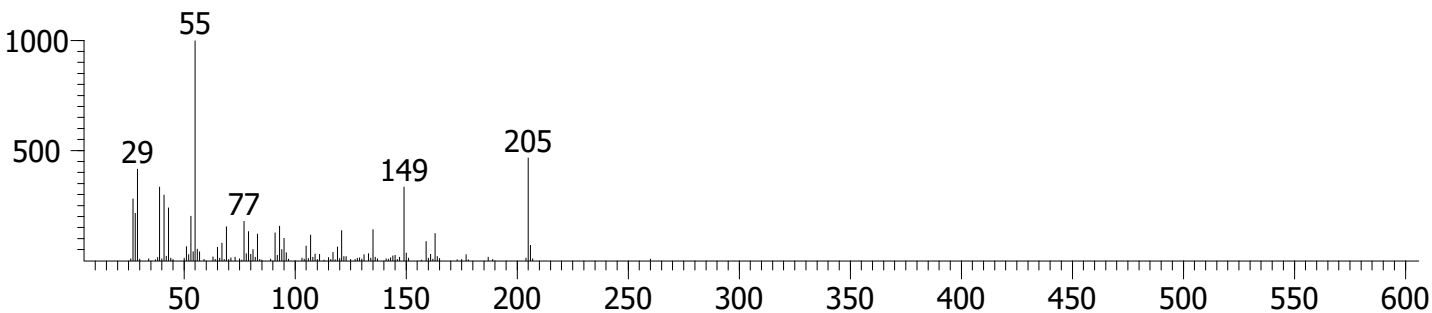

| Hit | Name                                                                                            | Similarity | Probability | CAS        | Library | Formula  | Weight |
|-----|-------------------------------------------------------------------------------------------------|------------|-------------|------------|---------|----------|--------|
| 1   | 2(5H)-Furanone, 4-methyl-3,5,5-tris(2-methyl-2-propenyl)-                                       | 767        | 4005        | 89902-28-3 | mainlib | C17H24O2 | 260    |
| 2   | 1H-Cycloprop[e]azulen-7-ol, decahydro-1,1,7-trimethyl-4-methylene-, [1ar-(1aà,4aà,7á,7aá,7bà)]- | 734        | 5437        | 6750-60-3  | replib  | C15H24O  | 220    |
| 3   | (1aR,3aR,4R,7R,8aS)-1a,4,9,9-Tetramethyloctahydro-3a,7-methanoazuleno[1,8a-b]oxirene            | 733        | 1027        | 25570-94-9 | mainlib | C15H24O  | 220    |
| 4   | Ethanone, 1-(5,6,7,8-tetrahydro-2,8,8-trimethyl-4H-cyclohepta[b]furan-5-yl)-                    | 728        | 827         | 71596-88-8 | mainlib | C14H20O2 | 220    |
| 5   | 11,14-Octadecadiynoic acid, methyl ester                                                        | 723        | 667         | 56554-58-6 | mainlib | C19H30O2 | 290    |

## Diphenyl sulfone

1st Dimension R.T. = 1742.78

2nd Dimension R.T. = 2.765

Quant Mass(es) = 125

S/N = 4199.4

Area = 1557283

Height = 118567

Similarity = 874

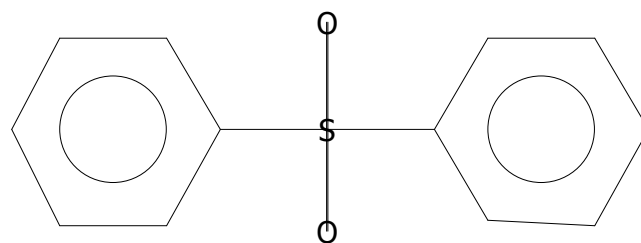

Peak Apex - sample "AnBxr B (20191121):1", peak 6729, at 1742.78 , 2.765 sec , sec (Spec # 191749)

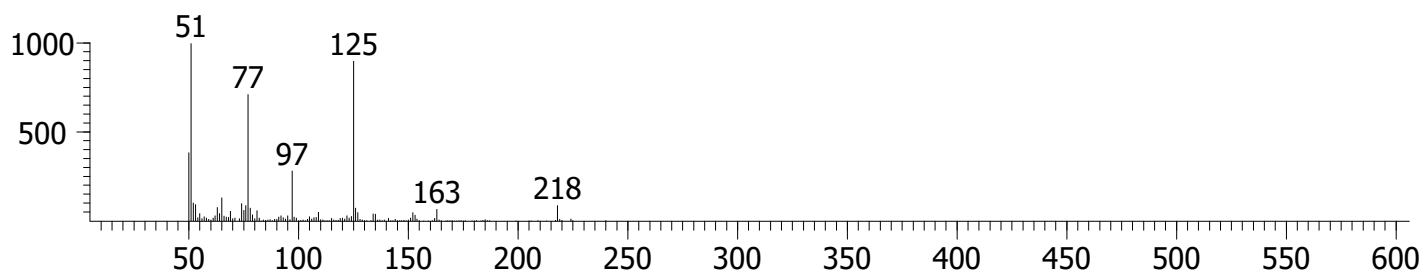

Peak True - sample "AnBxr B (20191121):1", peak 6729, at 1742.78 , 2.765 sec , sec (Spec # 191749)

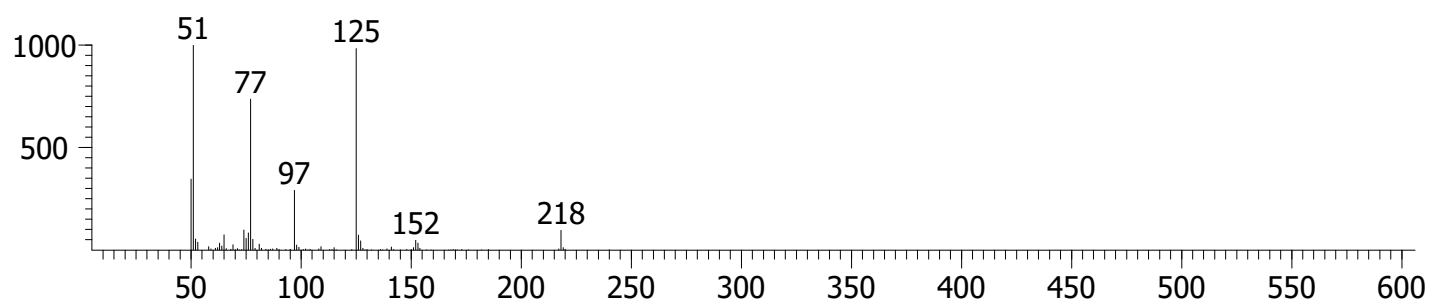

Library Hit - similarity 874, "Diphenyl sulfone"

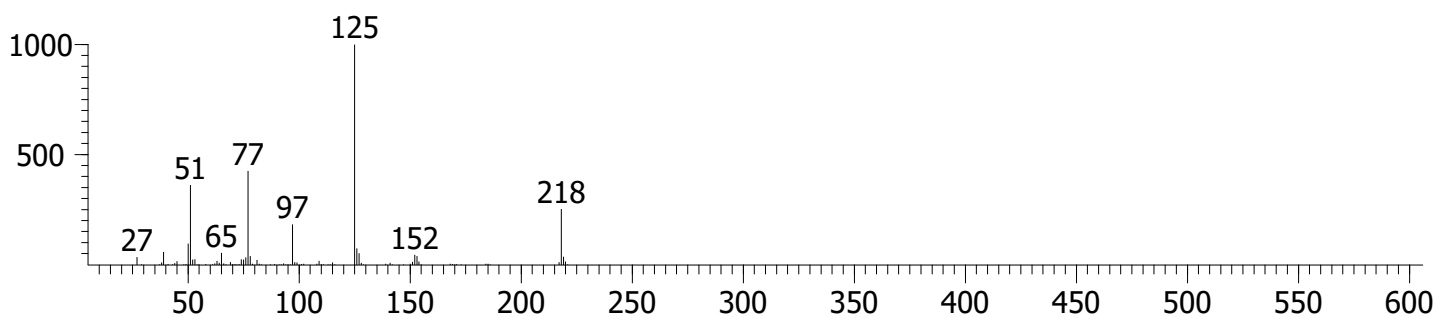

| Hit | Name                                                      | Similarity | Probability | CAS        | Library | Formula       | Weight |
|-----|-----------------------------------------------------------|------------|-------------|------------|---------|---------------|--------|
| 1   | Diphenyl sulfone                                          | 874        | 9078        | 127-63-9   | replib  | C12H10O2S     | 218    |
| 2   | Diphenyl sulfone                                          | 834        | 9078        | 127-63-9   | replib  | C12H10O2S     | 218    |
| 3   | Bis[phenylsulfonyl]-4-trichloromethylphenyl chloromethane | 824        | 5763        | 81269-12-7 | mainlib | C20H14Cl4O4S2 | 522    |
| 4   | 2-Propenenitrile, 3-(phenylsulfonyl)-                     | 803        | 2451        | 1424-51-7  | mainlib | C9H7NO2S      | 193    |
| 5   | 2-Propenenitrile, 3-(phenylsulfonyl)-                     | 787        | 800         | 1424-51-7  | replib  | C9H7NO2S      | 193    |

## Carbinoxamine

1st Dimension R.T. = 1756.77

2nd Dimension R.T. = 2.039

Quant Mass(es) = 58

S/N = 3419.9

Area = 2057163

Height = 196568

Similarity = 900

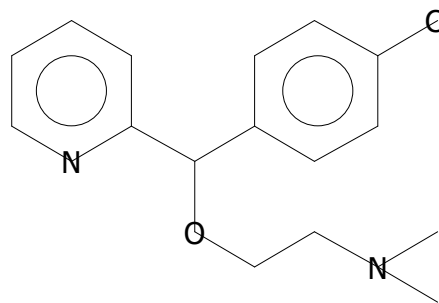

Peak Apex - sample "AnBxr B (20191121):1", peak 6807, at 1756.77 , 2.039 sec , sec (Spec # 193759)

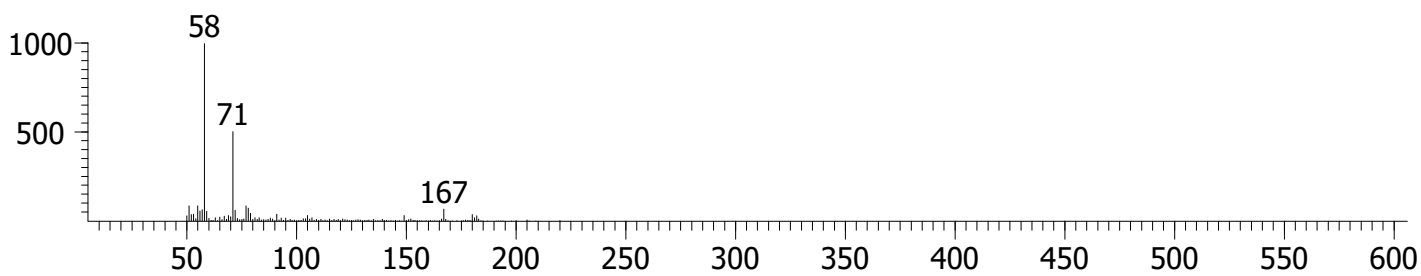

Peak True - sample "AnBxr B (20191121):1", peak 6807, at 1756.77 , 2.039 sec , sec (Spec # 193759)

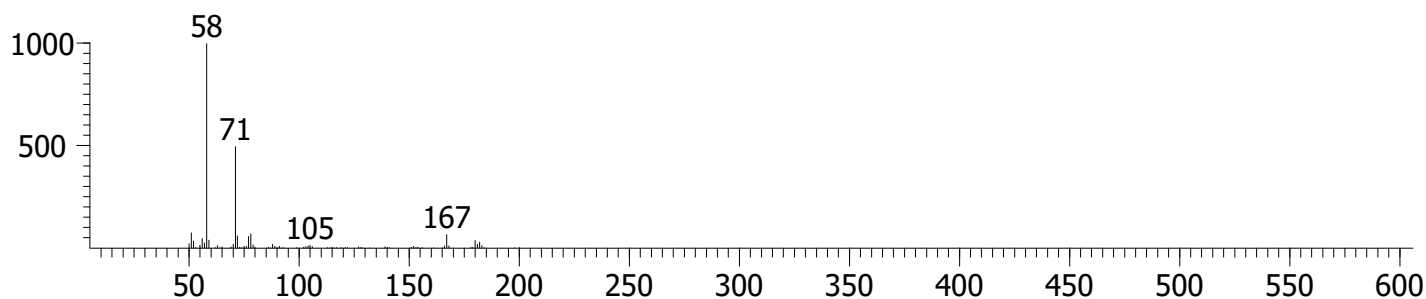

Library Hit - similarity 900, "Carbinoxamine"

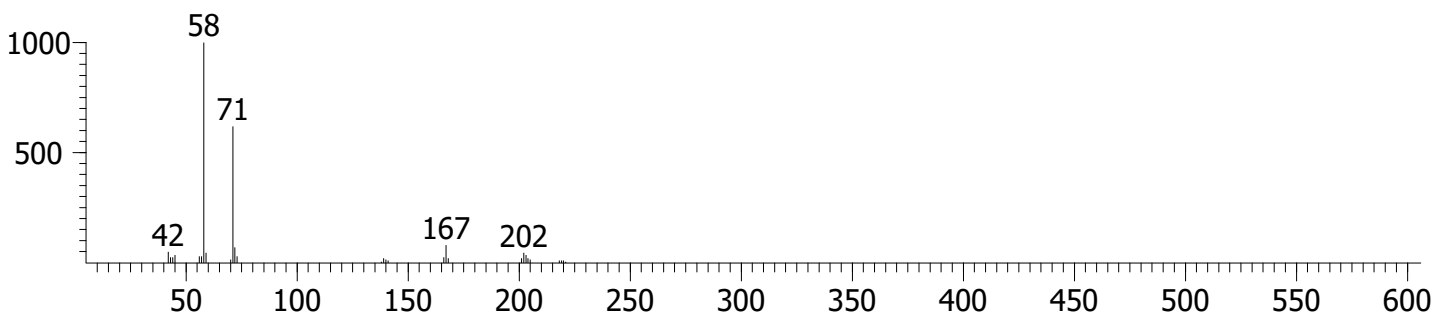

| Hit | Name                                                                                                                    | Similarity | Probability | CAS        | Library   | Formula     | Weight |
|-----|-------------------------------------------------------------------------------------------------------------------------|------------|-------------|------------|-----------|-------------|--------|
| 1   | Carbinoxamine                                                                                                           | 900        | 7896        | 486-16-8   | replib    | C16H19ClN2O | 290    |
| 2   | O-Ethyl S-2-dimethylaminoethyl ethylphosphonothiolate                                                                   | 856        | 3333        | 98543-25-0 | mainlib   | C8H20NO2PS  | 225    |
| 3   | O-Ethyl S-2-dimethylaminoethyl methylphosphonothiolate                                                                  | 840        | 1919        | 20820-80-8 | mainlib   | C7H18NO2PS  | 211    |
| 4   | Suberohydroxamic acid                                                                                                   | 835        | 8620        | 38937-66-5 | nist_msms | C8H16N2O4   | 204    |
| 5   | Acetic acid, (dodecahydro-7-hydroxy-1,4b,8,8-tetramethyl-10-oxo-2(1H)-phenanthrenylidene)-,2-(dimethylamino)ethyl ester | 830        | 1355        | 0-00-0     | mainlib   | C24H39NO4   | 405    |

## Norharmane, N-acetyl-

1st Dimension R.T. = 1823.23  
2nd Dimension R.T. = 2.330  
Quant Mass(es) = 168  
S/N = 827.11  
Area = 114224  
Height = 10206  
Similarity = 706

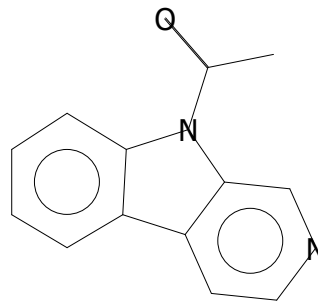

Peak Apex - sample "AnBxr B (20191121):1", peak 7153, at 1823.23 , 2.330 sec , sec (Spec # 203873)

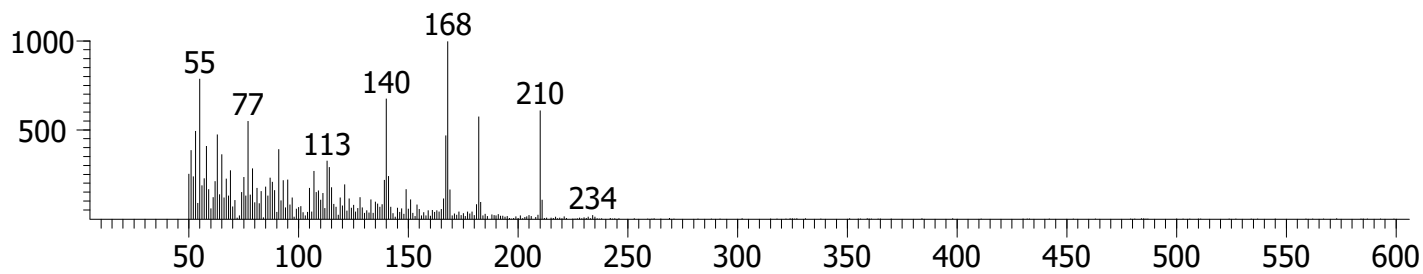

Peak True - sample "AnBxr B (20191121):1", peak 7153, at 1823.23 , 2.330 sec , sec (Spec # 203873)

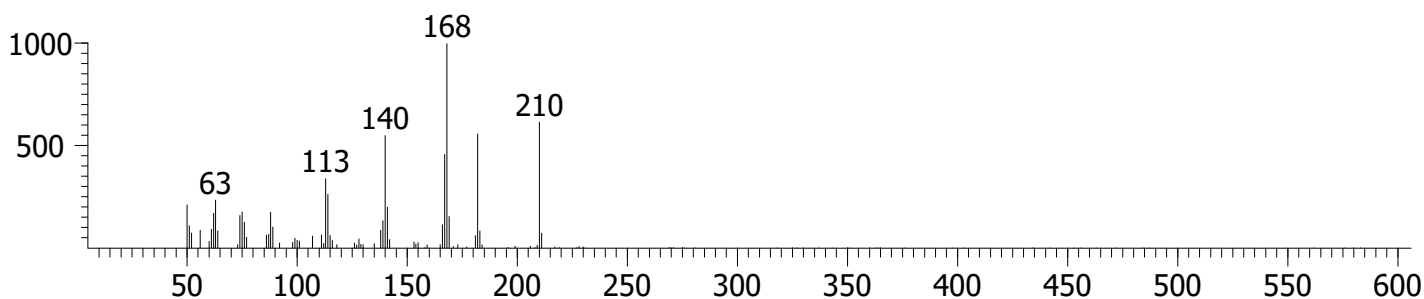

Library Hit - similarity 706, "Norharmane, N-acetyl-"

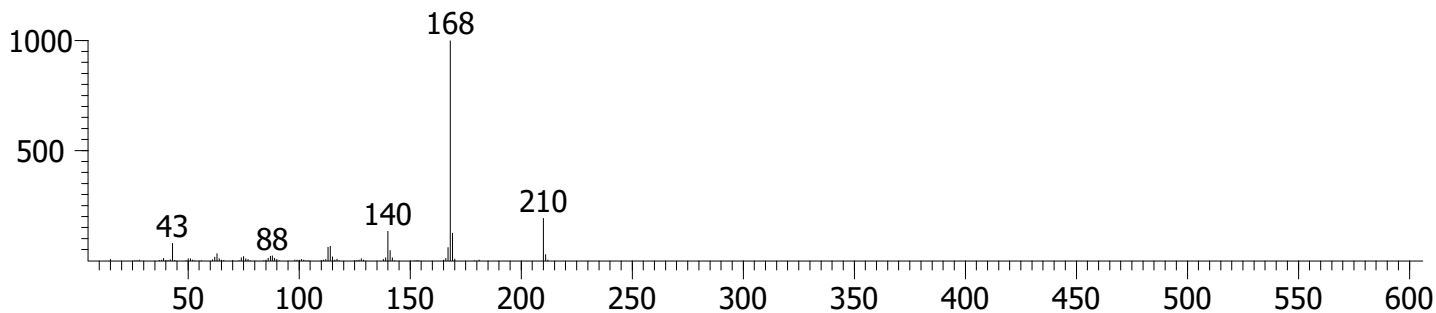

| Hit | Name                                       | Similarity | Probability | CAS        | Library | Formula                                                       | Weight |
|-----|--------------------------------------------|------------|-------------|------------|---------|---------------------------------------------------------------|--------|
| 1   | Norharmane, N-acetyl-                      | 706        | 3372        | 0-00-0     | mainlib | C <sub>13</sub> H <sub>10</sub> N <sub>2</sub> O              | 210    |
| 2   | 6-Methylquinoline-2-carbonitrile           | 687        | 1637        | 0-00-0     | mainlib | C <sub>11</sub> H <sub>8</sub> N <sub>2</sub>                 | 168    |
| 3   | á-Carboline-3-carboxylic acid propyl ester | 666        | 696         | 76808-18-9 | mainlib | C <sub>15</sub> H <sub>14</sub> N <sub>2</sub> O <sub>2</sub> | 254    |
| 4   | 9H-Pyrido[3,4-b]indole                     | 663        | 4471        | 244-63-3   | replib  | C <sub>11</sub> H <sub>8</sub> N <sub>2</sub>                 | 168    |
| 5   | 9H-Pyrido[3,4-b]indole                     | 662        | 4471        | 244-63-3   | replib  | C <sub>11</sub> H <sub>8</sub> N <sub>2</sub>                 | 168    |

1-Phenanthrenecarboxylic acid,  
2,3,4,4a,9,10,10a-octahydro-1,4a-dimethyl-

1st Dimension R.T. = 1973.65  
2nd Dimension R.T. = 2.211  
Quant Mass(es) = 257  
S/N = 1891.9  
Area = 256365  
Height = 19571  
Similarity = 697

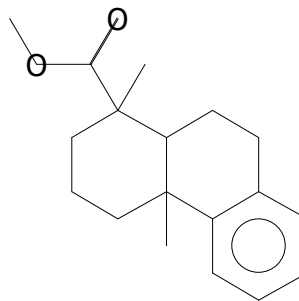

Peak Apex - sample "AnBxr B (20191121):1", peak 7716, at 1973.65 , 2.211 sec , sec (Spec # 226645)

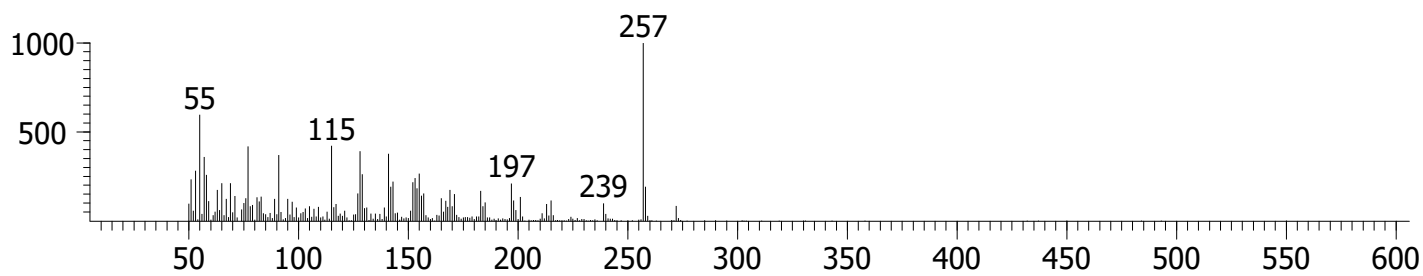

Peak True - sample "AnBxr B (20191121):1", peak 7716, at 1973.65 , 2.211 sec , sec (Spec # 226645)

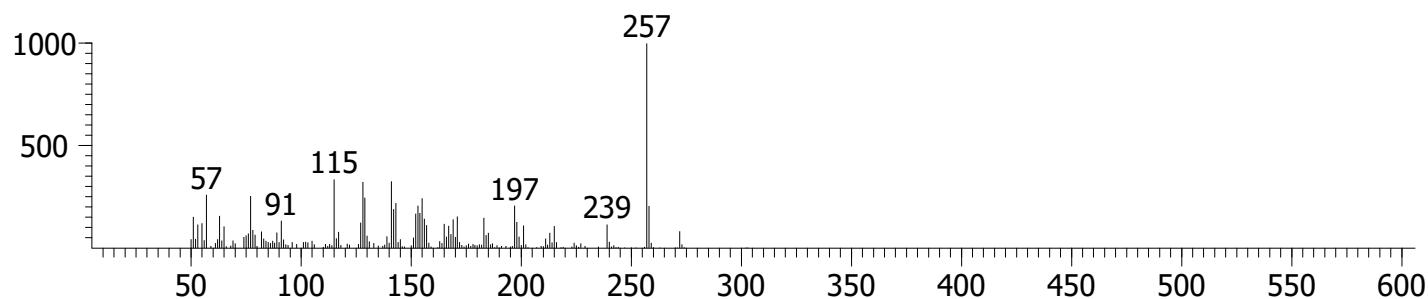

Library Hit - similarity 697, "1-Phenanthrenecarboxylic acid, 1,2,3,4,4a,9,10,10a-octahydro-1,4a-dimethyl-, methyl ester, [1S-(1à,4aà,10aá)]-"

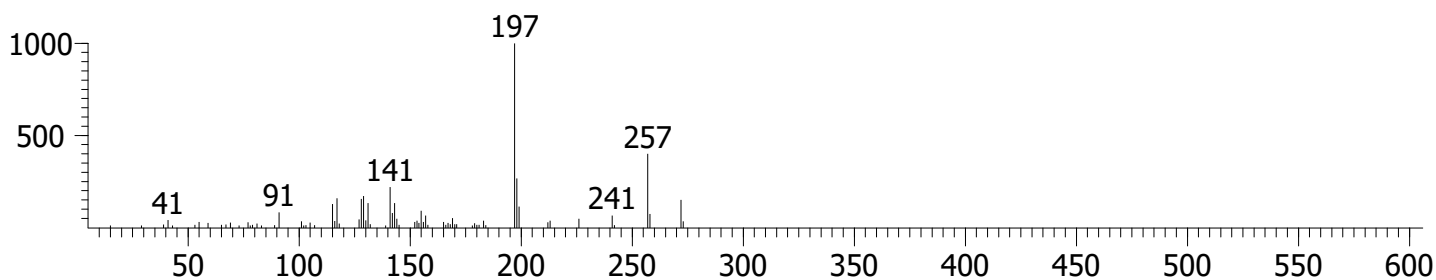

| Hit | Name                                                                                                           | Similarity | Probability | CAS         | Library | Formula  | Weight |
|-----|----------------------------------------------------------------------------------------------------------------|------------|-------------|-------------|---------|----------|--------|
| 1   | 1-Phenanthrenecarboxylic acid, 1,2,3,4,4a,9,10,10a-octahydro-1,4a-dimethyl-, methyl ester, [1S-(1à,4aà,10aá)]- | 697        | 3606        | 2651-34-5   | mainlib | C18H24O2 | 272    |
| 2   | 1-Phenanthrenecarboxylic acid, 1,2,3,4,4a,9,10,10a-octahydro-1,4a-dimethyl-, methyl ester                      | 667        | 1002        | 108395-86-4 | mainlib | C18H24O2 | 272    |
| 3   | 5,8,11-Heptadecatriynoic acid, methyl ester                                                                    | 662        | 808         | 56554-57-5  | mainlib | C18H24O2 | 272    |
| 4   | 5,8,11-Eicosatriynoic acid, methyl ester                                                                       | 658        | 682         | 0-00-0      | mainlib | C21H30O2 | 314    |
| 5   | 5à-Podocarpa-8,11,13-trien-16-oic acid, methyl ester                                                           | 657        | 656         | 3745-36-6   | mainlib | C18H24O2 | 272    |



# Phenol, 4,4'-(1-methylethylidene)bis-

1st Dimension R.T. = 1973.65

2nd Dimension R.T. = 2.633

Quant Mass(es) = 213

S/N = 7815.3

Area = 1788254

Height = 133294

Similarity = 881

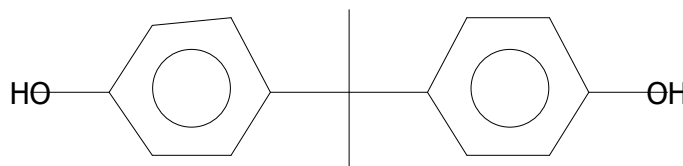

Peak Apex - sample "AnBxr B (20191121):1", peak 7719, at 1973.65 , 2.633 sec , sec (Spec # 226709)

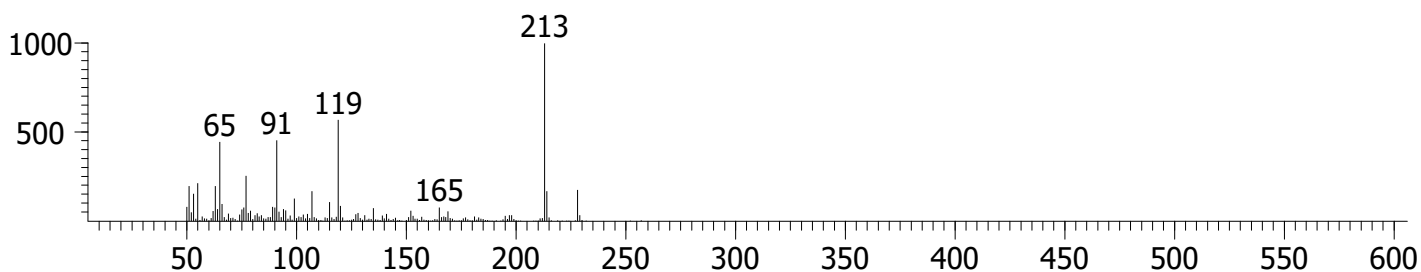

Peak True - sample "AnBxr B (20191121):1", peak 7719, at 1973.65 , 2.633 sec , sec (Spec # 226709)

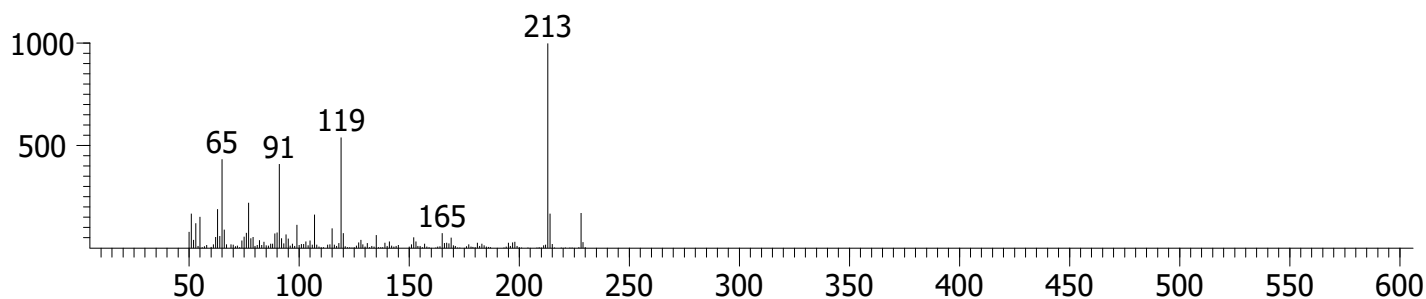

Library Hit - similarity 881, "Phenol, 4,4'-(1-methylethylidene)bis-"

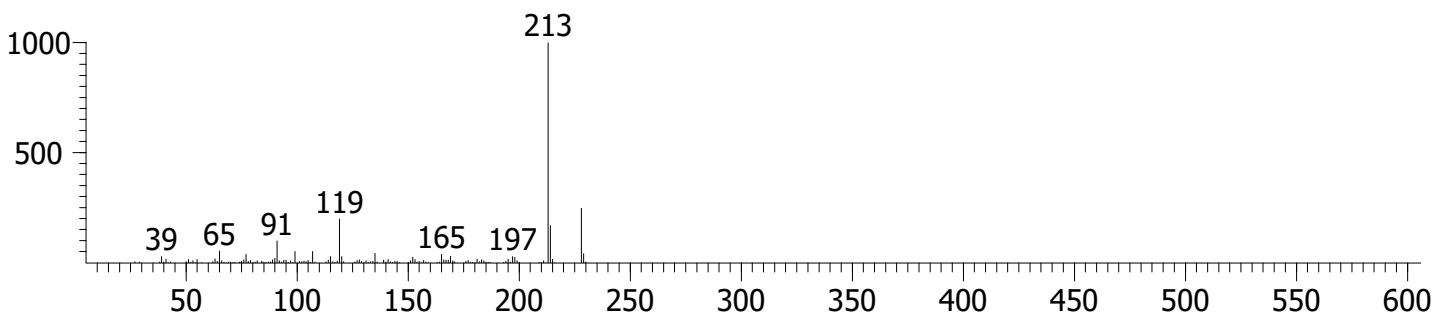

| Hit | Name                                  | Similarity | Probability | CAS        | Library | Formula  | Weight |
|-----|---------------------------------------|------------|-------------|------------|---------|----------|--------|
| 1   | Phenol, 4,4'-(1-methylethylidene)bis- | 881        | 8664        | 80-05-7    | replib  | C15H16O2 | 228    |
| 2   | 3,4'-Isopropylidenediphenol           | 871        | 7502        | 46765-25-7 | mainlib | C15H16O2 | 228    |
| 3   | Phenol, 4,4'-(1-methylethylidene)bis- | 821        | 1526        | 80-05-7    | mainlib | C15H16O2 | 228    |
| 4   | Phenol, 4,4'-(1-methylethylidene)bis- | 818        | 8664        | 80-05-7    | replib  | C15H16O2 | 228    |
| 5   | Phenol, 2,4'-isopropylidenedi-        | 794        | 449         | 837-08-1   | mainlib | C15H16O2 | 228    |

## Adipic acid, 2-decyl isobutyl ester

1st Dimension R.T. = 2194.02

2nd Dimension R.T. = 1.663

Quant Mass(es) = 185

S/N = 1180.1

Area = 110927

Height = 11658

Similarity = 694

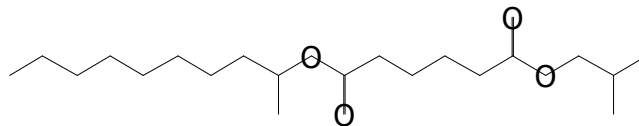

Peak Apex - sample "AnBxr B (20191121):1", peak 8358, at 2194.02 , 1.663 sec , sec (Spec # 259952)

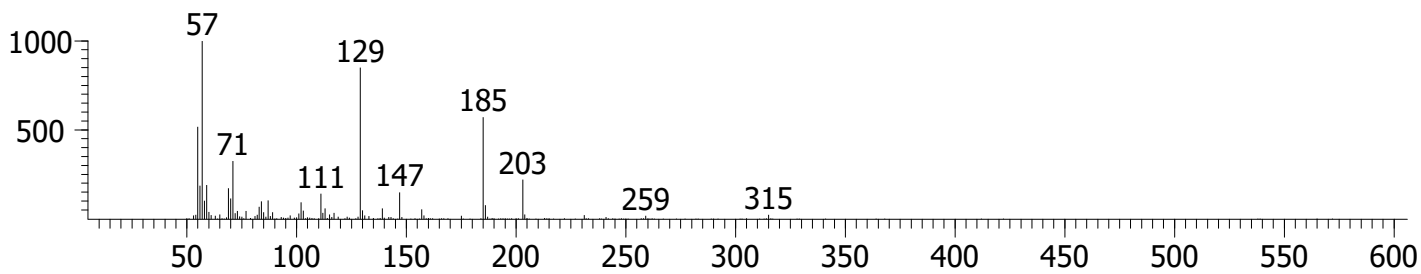

Peak True - sample "AnBxr B (20191121):1", peak 8358, at 2194.02 , 1.663 sec , sec (Spec # 259952)

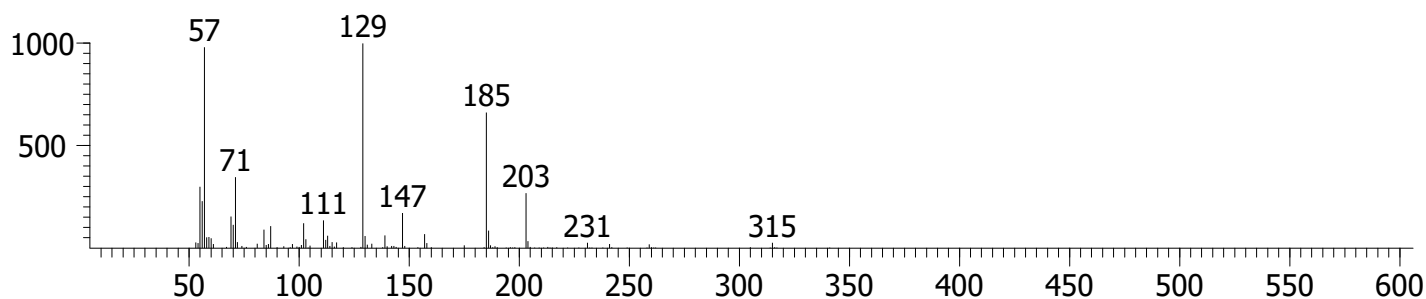

Library Hit - similarity 694, "Adipic acid, 2-decyl isobutyl ester"

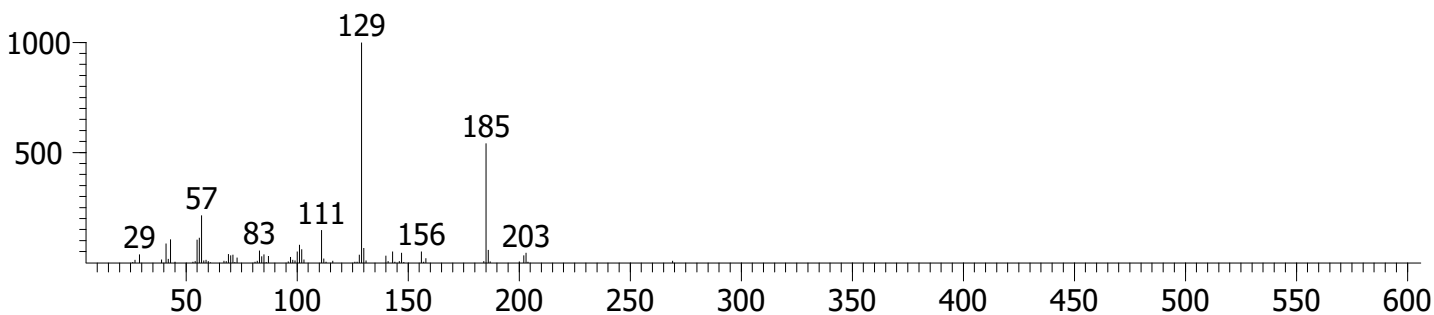

| Hit | Name                                     | Similarity | Probability | CAS     | Library | Formula  | Weight |
|-----|------------------------------------------|------------|-------------|---------|---------|----------|--------|
| 1   | Adipic acid, 2-decyl isobutyl ester      | 694        | 1072        | 0-00-0  | mainlib | C20H38O4 | 342    |
| 2   | Adipic acid, 2-ethylhexyl isobutyl ester | 693        | 1031        | 0-00-0  | mainlib | C18H34O4 | 314    |
| 3   | Butyl citrate                            | 691        | 5631        | 77-94-1 | replib  | C18H32O7 | 360    |
| 4   | Adipic acid, isobutyl octadecyl ester    | 688        | 830         | 0-00-0  | mainlib | C28H54O4 | 454    |
| 5   | Adipic acid, butyl 2-ethylhexyl ester    | 687        | 798         | 0-00-0  | mainlib | C18H34O4 | 314    |

1,3-Benzenedicarboxylic acid,  
bis(2-ethylhexyl) ester

1st Dimension R.T. = 2382.91  
2nd Dimension R.T. = 1.604  
Quant Mass(es) = 149  
S/N = 2433.0  
Area = 384542  
Height = 41692  
Similarity = 802

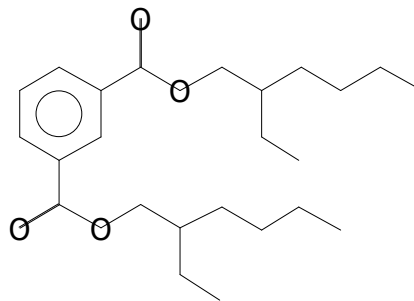

Peak Apex - sample "AnBxr B (20191121):1", peak 8736, at 2382.91 , 1.604 sec , sec (Spec # 288563)

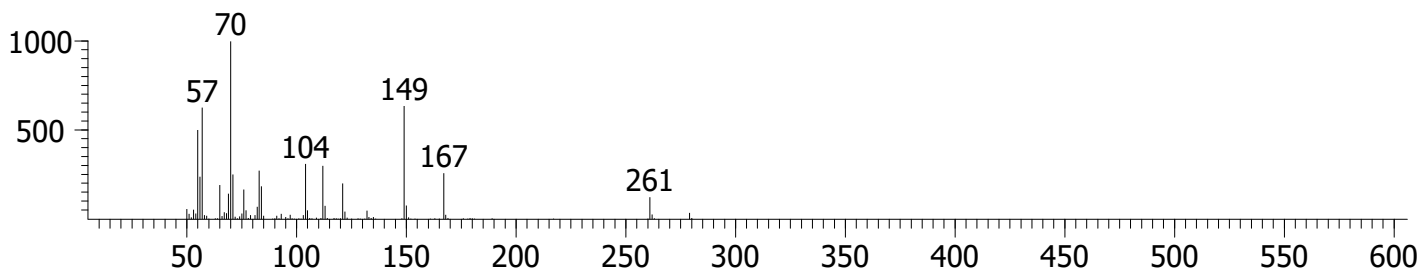

Peak True - sample "AnBxr B (20191121):1", peak 8736, at 2382.91 , 1.604 sec , sec (Spec # 288563)

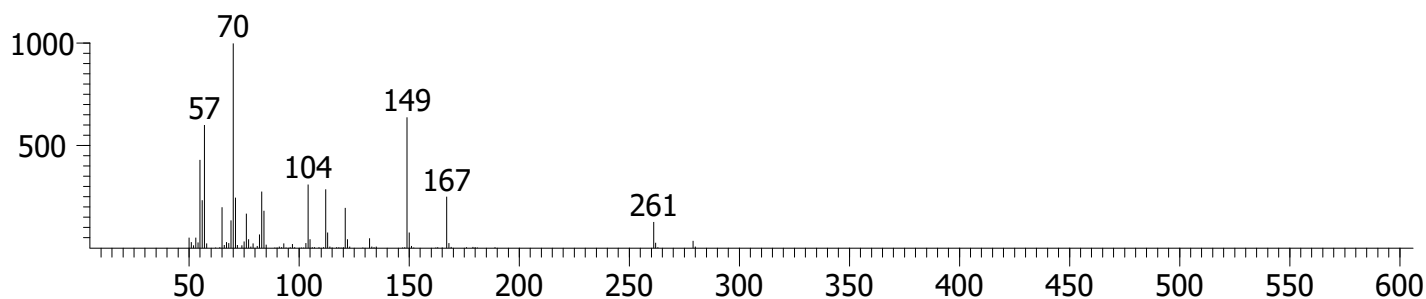

Library Hit - similarity 802, "1,3-Benzenedicarboxylic acid, bis(2-ethylhexyl) ester"

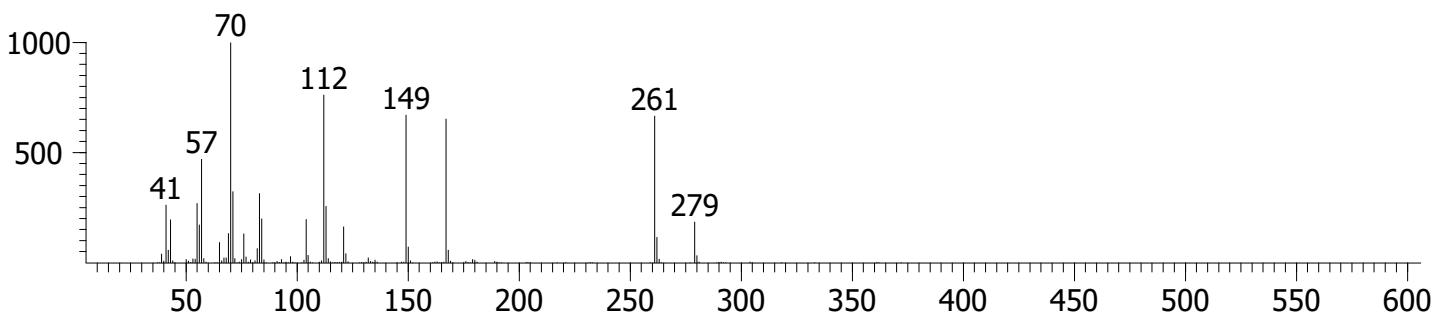

| Hit | Name                                                  | Similarity | Probability | CAS       | Library | Formula                                        | Weight |
|-----|-------------------------------------------------------|------------|-------------|-----------|---------|------------------------------------------------|--------|
| 1   | 1,3-Benzenedicarboxylic acid, bis(2-ethylhexyl) ester | 802        | 7442        | 137-89-3  | mainlib | C <sub>24</sub> H <sub>38</sub> O <sub>4</sub> | 390    |
| 2   | 1,3-Benzenedicarboxylic acid, bis(2-ethylhexyl) ester | 798        | 5082        | 137-89-3  | replib  | C <sub>24</sub> H <sub>38</sub> O <sub>4</sub> | 390    |
| 3   | 1,4-Benzenedicarboxylic acid, bis(2-ethylhexyl) ester | 788        | 3588        | 6422-86-2 | replib  | C <sub>24</sub> H <sub>38</sub> O <sub>4</sub> | 390    |
| 4   | 1,4-Benzenedicarboxylic acid, bis(2-ethylhexyl) ester | 763        | 3588        | 6422-86-2 | replib  | C <sub>24</sub> H <sub>38</sub> O <sub>4</sub> | 390    |
| 5   | Mono(2-ethylhexyl) phthalate                          | 760        | 1036        | 4376-20-9 | replib  | C <sub>16</sub> H <sub>22</sub> O <sub>4</sub> | 278    |

# Tris(2,4-di-tert-butylphenyl) phosphate

1st Dimension R.T. = 3358.85  
2nd Dimension R.T. = 1.914  
Quant Mass(es) = 57  
S/N = 883.54  
Area = 6128276  
Height = 181801  
Similarity = 649

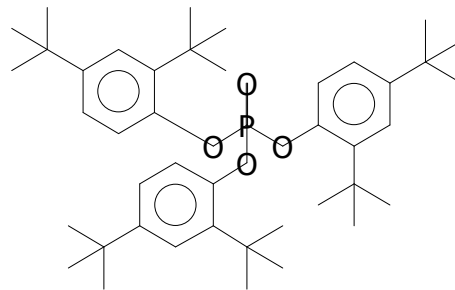

Peak Apex - sample "AnBxr B (20191121):1", peak 9729, at 3358.85 , 1.914 sec , sec (Spec # 436480)

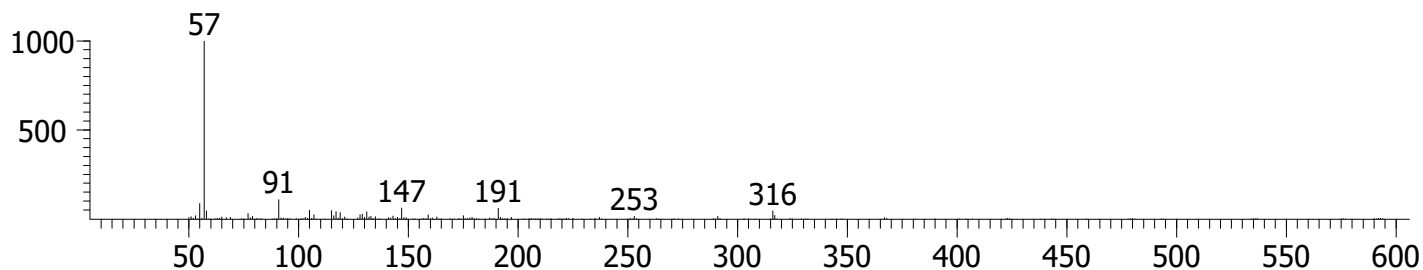

Peak True - sample "AnBxr B (20191121):1", peak 9729, at 3358.85 , 1.914 sec , sec (Spec # 436480)

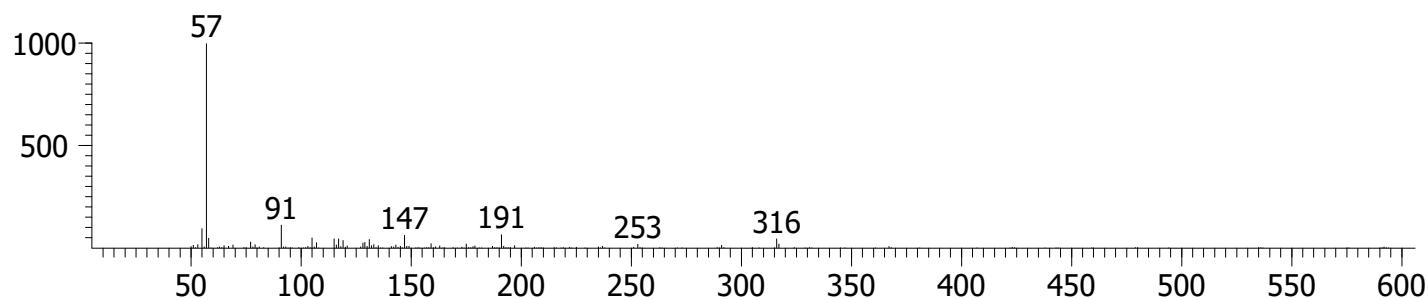

Library Hit - similarity 649, "Tris(2,4-di-tert-butylphenyl) phosphate"

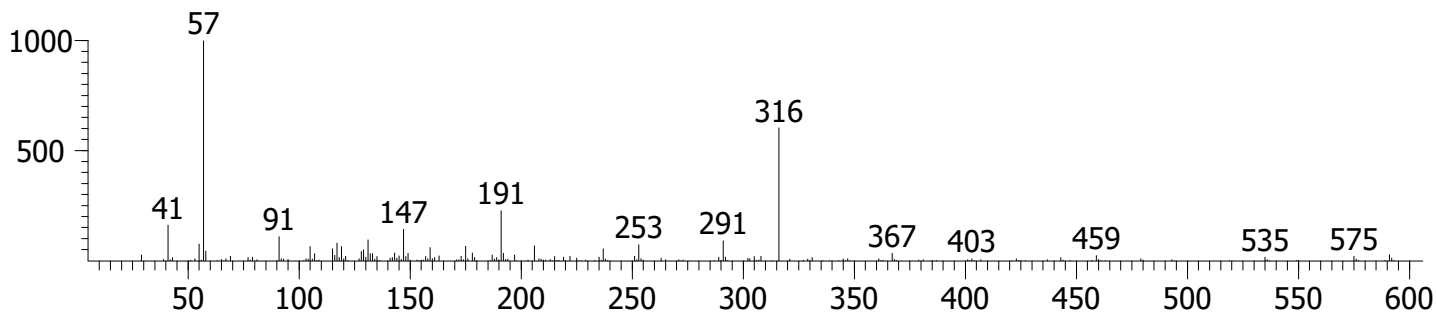

| Hit | Name                                    | Similarity | Probability | CAS        | Library   | Formula   | Weight |
|-----|-----------------------------------------|------------|-------------|------------|-----------|-----------|--------|
| 1   | Tris(2,4-di-tert-butylphenyl) phosphate | 649        | 1948        | 95906-11-9 | mainlib   | C42H63O4P | 662    |
| 2   | ̑-Hydroxybutyric acid                   | 647        | 915         | 20016-85-7 | nist_msms | C4H8O3    | 104    |
| 3   | 2-Decanol                               | 647        | 915         | 1120-06-5  | nist_msms | C10H22O   | 158    |
| 4   | Aziridine, 1-methyl-                    | 645        | 3017        | 1072-44-2  | replib    | C3H7N     | 57     |
| 5   | Butoxyacetic acid                       | 643        | 772         | 2516-93-0  | nist_msms | C6H12O3   | 132    |

## 5-Hepten-2-one, 6-methyl-

1st Dimension R.T. = 563.952

2nd Dimension R.T. = 1.432

Quant Mass(es) = 108

S/N = 593.58

Area = 101105

Height = 10009

Similarity = 894

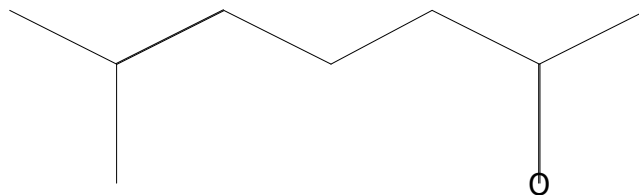

Peak Apex - sample "AnBxr C 091919 (20191122):1", peak 147, at 563.952 , 1.432 sec , sec (Spec # 12937)

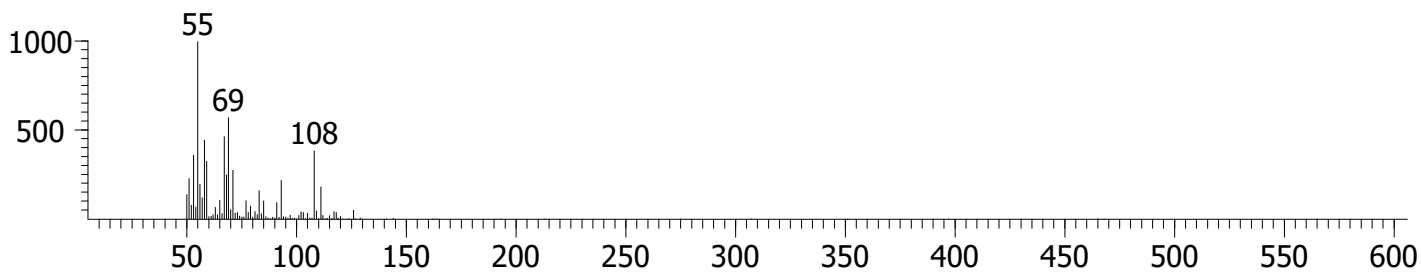

Peak True - sample "AnBxr C 091919 (20191122):1", peak 147, at 563.952 , 1.432 sec , sec (Spec # 12937)

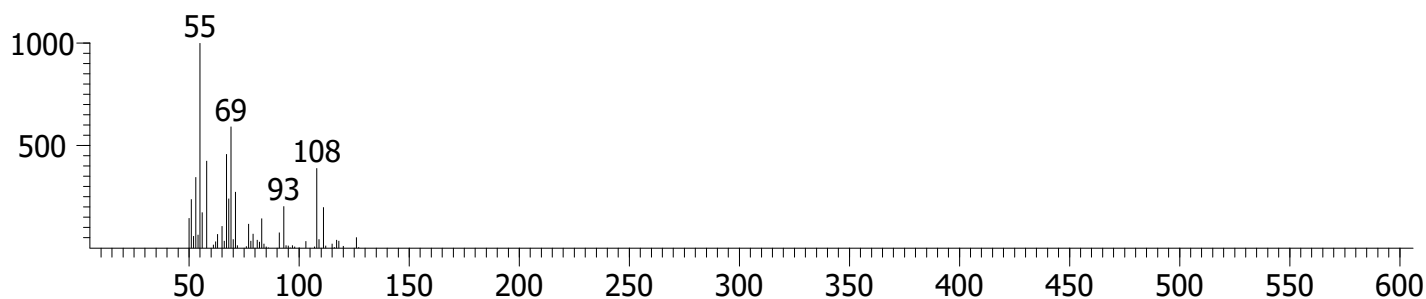

Library Hit - similarity 894, "5-Hepten-2-one, 6-methyl-"

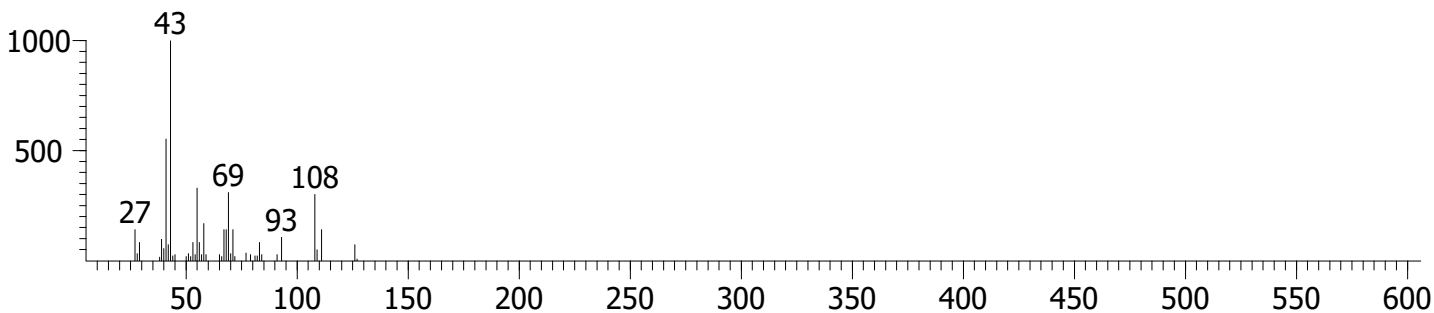

| Hit | Name                      | Similarity | Probability | CAS      | Library | Formula | Weight |
|-----|---------------------------|------------|-------------|----------|---------|---------|--------|
| 1   | 5-Hepten-2-one, 6-methyl- | 894        | 9556        | 110-93-0 | replib  | C8H14O  | 126    |
| 2   | 5-Hepten-2-one, 6-methyl- | 867        | 9556        | 110-93-0 | replib  | C8H14O  | 126    |
| 3   | 5-Hepten-2-one, 6-methyl- | 849        | 9556        | 110-93-0 | replib  | C8H14O  | 126    |
| 4   | 5-Hepten-2-one, 6-methyl- | 826        | 7341        | 110-93-0 | mainlib | C8H14O  | 126    |
| 5   | 5-Hepten-2-one, 6-methyl- | 817        | 9556        | 110-93-0 | replib  | C8H14O  | 126    |

## 2-Pentenoic acid, ethyl ester

1st Dimension R.T. = 1221.58

2nd Dimension R.T. = 2.092

Quant Mass(es) = 83

S/N = 571.11

Area = 346135

Height = 35414

Similarity = 759

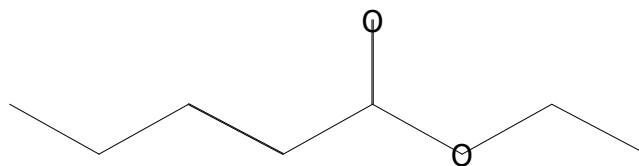

Peak Apex - sample "AnBxr C 091919 (20191122):1", peak 2598, at 1221.58 , 2.092 sec , sec (Spec # 112677)

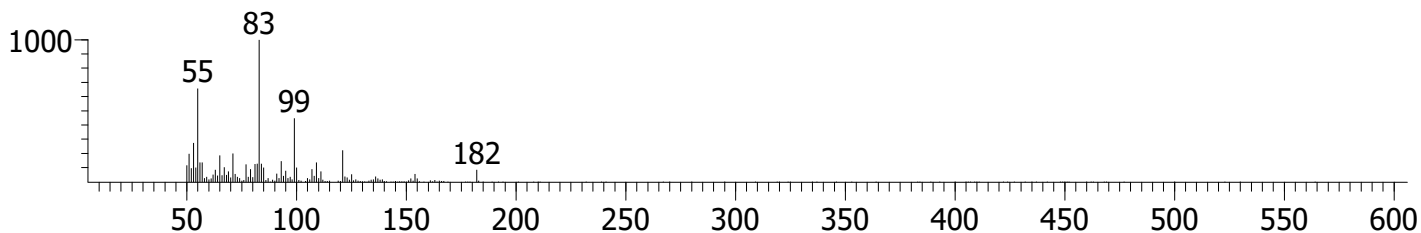

Peak True - sample "AnBxr C 091919 (20191122):1", peak 2598, at 1221.58 , 2.092 sec , sec (Spec # 112677)

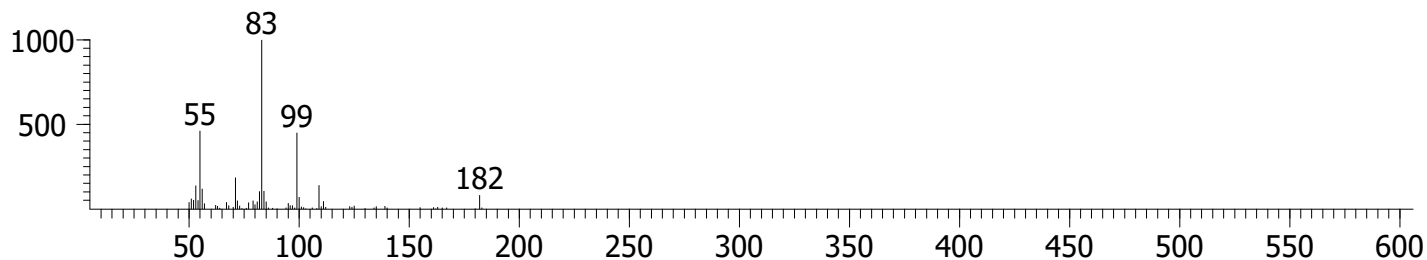

Library Hit - similarity 759, "2-Pentenoic acid, ethyl ester"

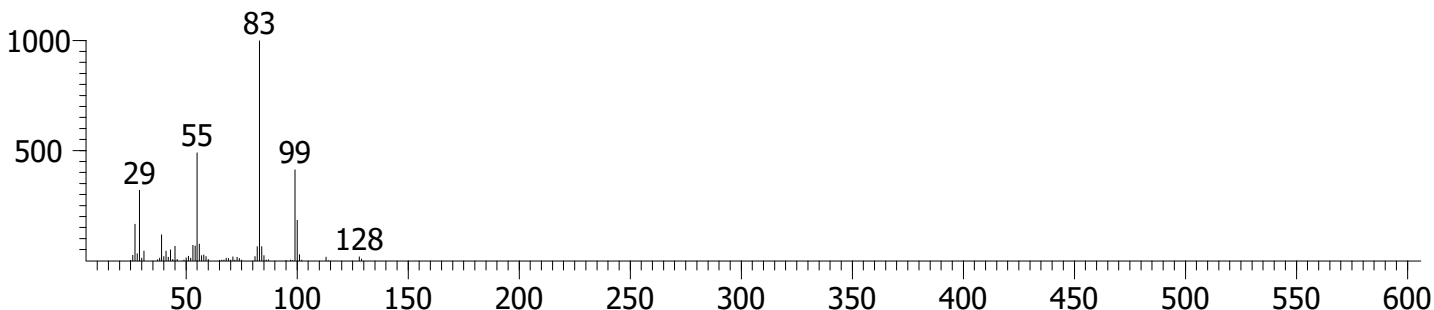

| Hit | Name                                                              | Similarity | Probability | CAS        | Library | Formula  | Weight |
|-----|-------------------------------------------------------------------|------------|-------------|------------|---------|----------|--------|
| 1   | 2-Pentenoic acid, ethyl ester                                     | 759        | 4155        | 2445-93-4  | mainlib | C7H12O2  | 128    |
| 2   | 2,2-Dimethyl-4-octenal                                            | 731        | 1200        | 30390-60-4 | mainlib | C10H18O  | 154    |
| 3   | Ethyl trans-2-pentenoate                                          | 730        | 1153        | 24410-84-2 | mainlib | C7H12O2  | 128    |
| 4   | 2-Butynoic acid, 4-[(tetrahydro-2H-pyran-2-yl)oxy]-, methyl ester | 728        | 1063        | 69511-49-5 | mainlib | C10H14O4 | 198    |
| 5   | 5-Octen-2-one, 3,6-dimethyl-                                      | 721        | 814         | 64165-21-5 | mainlib | C10H18O  | 154    |

# Benzene, 1-chloro-3-phenoxy-

1st Dimension R.T. = 1382.48

2nd Dimension R.T. = 1.934

Quant Mass(es) = 204

S/N = 739.11

Area = 56993

Height = 7130.3

Similarity = 796

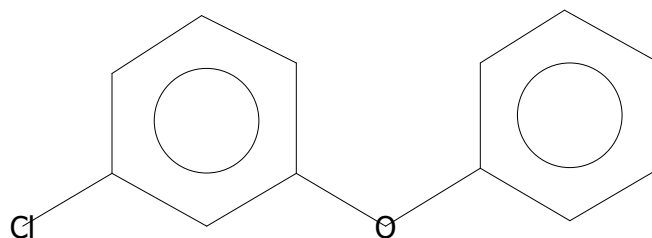

Peak Apex - sample "AnMbr B (20191120):1", peak 3448, at 1382.48 , 1.934 sec , sec (Spec # 137033)

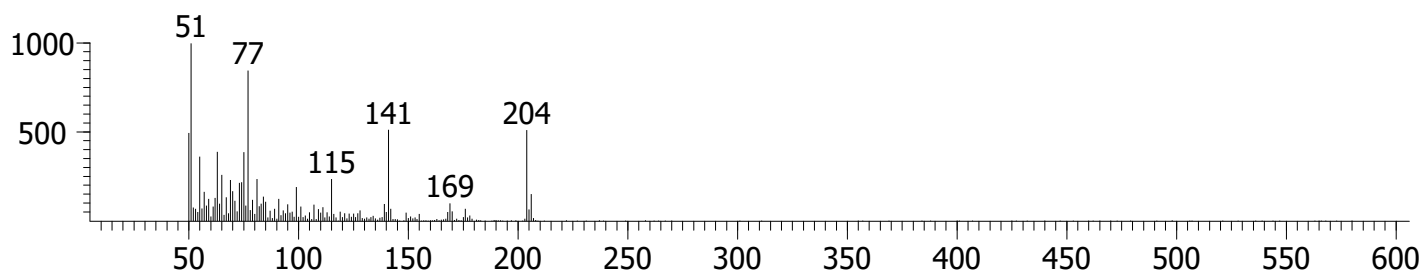

Peak True - sample "AnMbr B (20191120):1", peak 3448, at 1382.48 , 1.934 sec , sec (Spec # 137033)

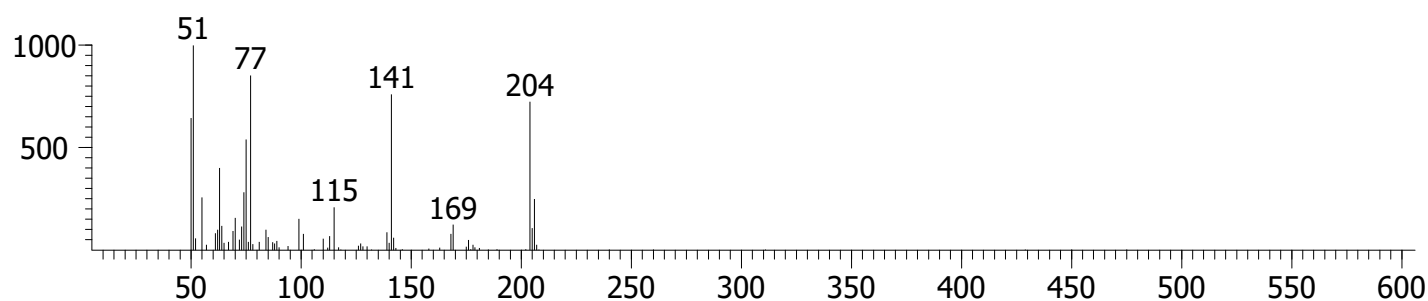

Library Hit - similarity 796, "Benzene, 1-chloro-3-phenoxy-"

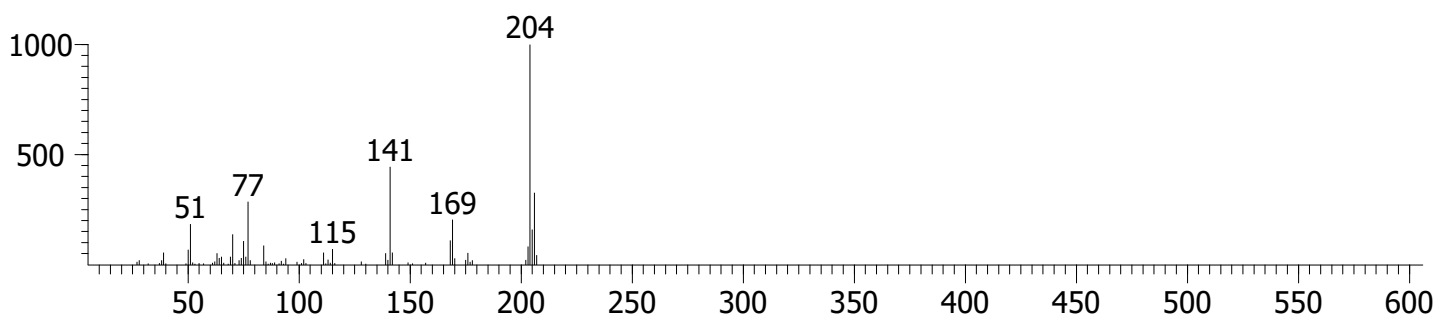

| Hit | Name                                | Similarity | Probability | CAS        | Library | Formula                                          | Weight |
|-----|-------------------------------------|------------|-------------|------------|---------|--------------------------------------------------|--------|
| 1   | Benzene, 1-chloro-3-phenoxy-        | 796        | 5789        | 6452-49-9  | mainlib | C <sub>12</sub> H <sub>9</sub> ClO               | 204    |
| 2   | Benzene, 1-chloro-4-phenoxy-        | 781        | 3508        | 7005-72-3  | mainlib | C <sub>12</sub> H <sub>9</sub> ClO               | 204    |
| 3   | [1,1'-Biphenyl-4-ol], 2-chloro-     | 678        | 247         | 23719-22-4 | mainlib | C <sub>12</sub> H <sub>9</sub> ClO               | 204    |
| 4   | [1,1'-Biphenyl]-4-ol, 4'-chloro-    | 646        | 66          | 28034-99-3 | mainlib | C <sub>12</sub> H <sub>9</sub> ClO               | 204    |
| 5   | 4-Hydroxy-2-chlorobiphenyl, acetate | 638        | 49          | 0-00-0     | mainlib | C <sub>14</sub> H <sub>11</sub> ClO <sub>2</sub> | 246    |

# Cyclohexanone, 3,3,5-trimethyl-

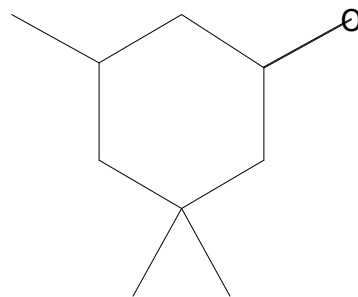

1st Dimension R.T. = 647.904

2nd Dimension R.T. = 1.465

Quant Mass(es) = 83

S/N = 5769.4

Area = 2230935

Height = 266284

Similarity = 854

Peak Apex - sample "AnMbr C (20191120):1", peak 413, at 647.904 , 1.465 sec , sec (Spec # 25662)

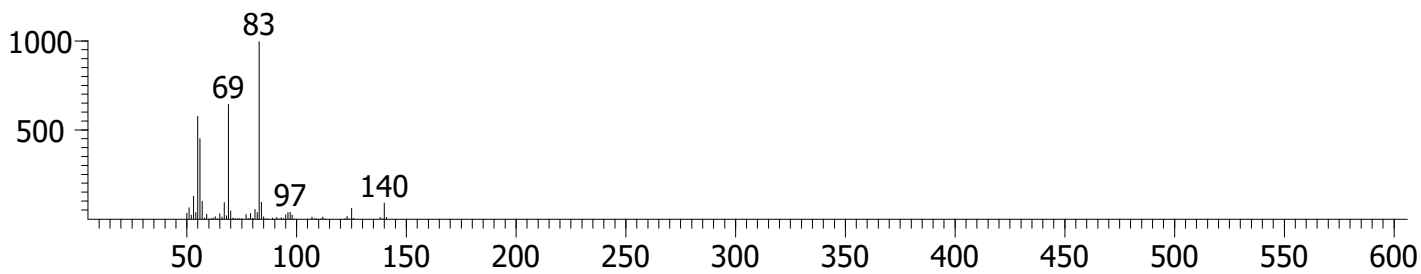

Peak True - sample "AnMbr C (20191120):1", peak 413, at 647.904 , 1.465 sec , sec (Spec # 25662)

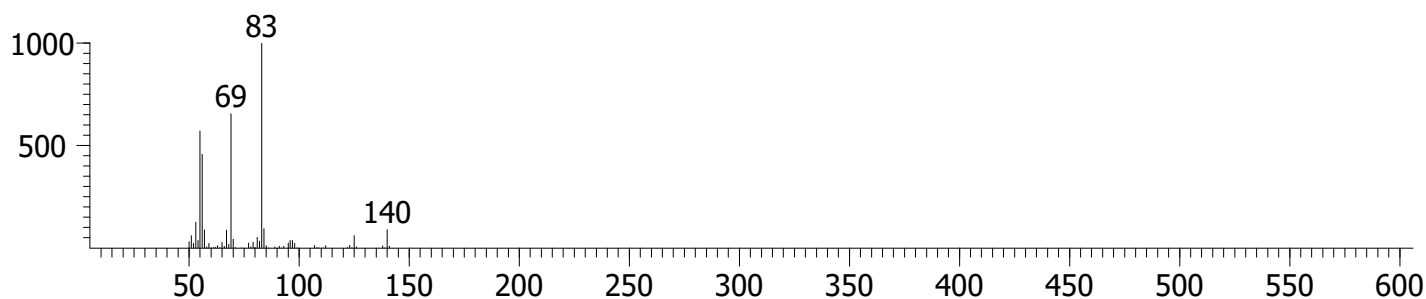

Library Hit - similarity 854, "Cyclohexanone, 3,3,5-trimethyl-"

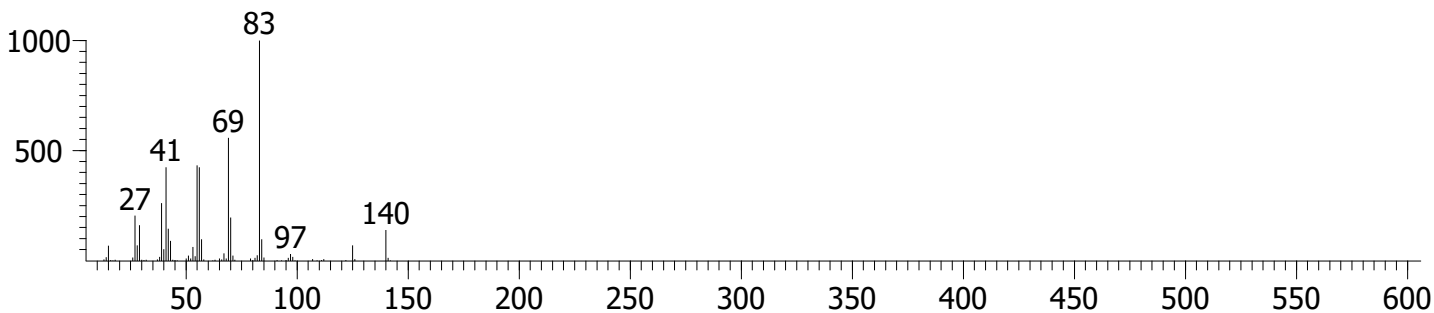

| Hit | Name                            | Similarity | Probability | CAS        | Library | Formula  | Weight |
|-----|---------------------------------|------------|-------------|------------|---------|----------|--------|
| 1   | Cyclohexanone, 3,3,5-trimethyl- | 854        | 6277        | 873-94-9   | mainlib | C9H16O   | 140    |
| 2   | 2,4,6-Trimethyl-3-heptene       | 807        | 1313        | 0-00-0     | mainlib | C10H20   | 140    |
| 3   | 2,4-Dimethylsulfolane           | 780        | 386         | 1003-78-7  | mainlib | C6H12O2S | 148    |
| 4   | 4-Pentenal                      | 759        | 164         | 2100-17-6  | mainlib | C5H8O    | 84     |
| 5   | 3-Octene, 2,2-dimethyl-         | 758        | 157         | 86869-76-3 | mainlib | C10H20   | 140    |



# Cyclohexanone, 4-(1,1-dimethylethyl)-

1st Dimension R.T. = 913.752  
2nd Dimension R.T. = 1.630  
Quant Mass(es) = 98  
S/N = 9906.0  
Area = 1533717  
Height = 184111  
Similarity = 935

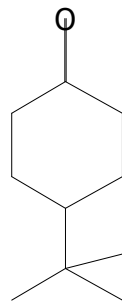

Peak Apex - sample "AnMbr C (20191120):1", peak 1355, at 913.752 , 1.630 sec , sec (Spec # 65967)

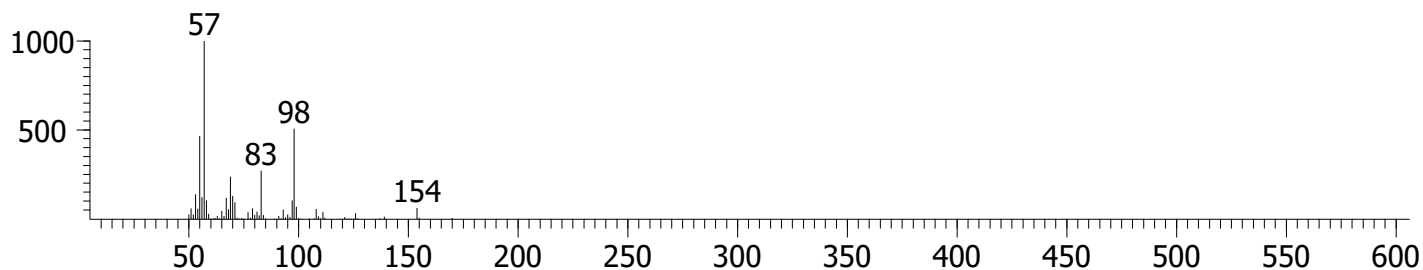

Peak True - sample "AnMbr C (20191120):1", peak 1355, at 913.752 , 1.630 sec , sec (Spec # 65967)

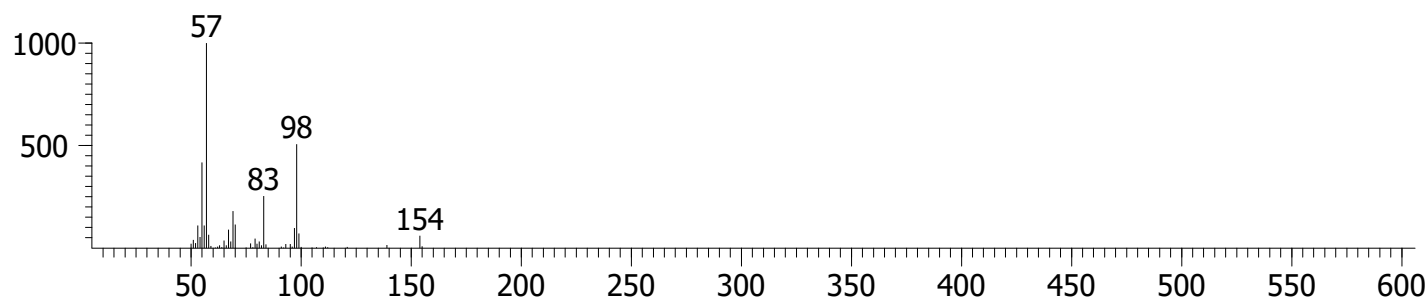

Library Hit - similarity 935, "Cyclohexanone, 4-(1,1-dimethylethyl)-"

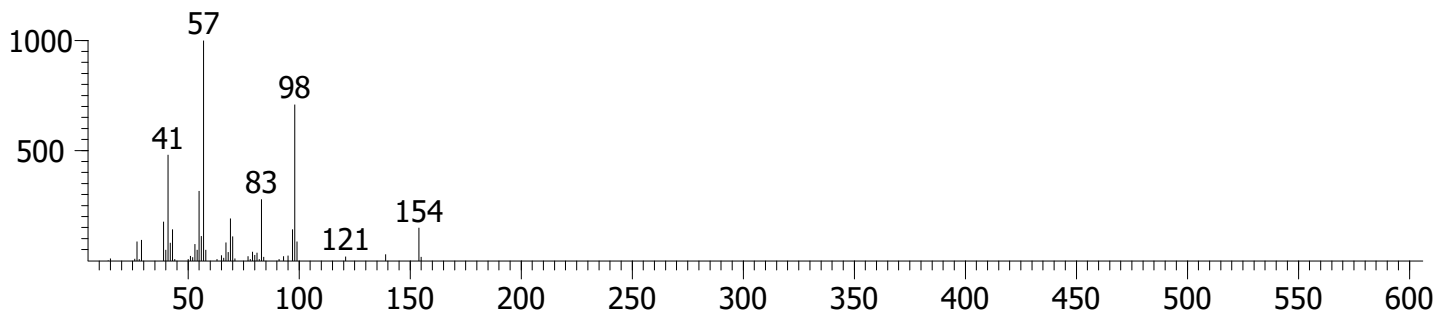

| Hit | Name                                       | Similarity | Probability | CAS        | Library | Formula | Weight |
|-----|--------------------------------------------|------------|-------------|------------|---------|---------|--------|
| 1   | Cyclohexanone, 4-(1,1-dimethylethyl)-      | 935        | 8262        | 98-53-3    | mainlib | C10H18O | 154    |
| 2   | 4-Octylcyclohexanone                       | 859        | 1041        | 0-00-0     | mainlib | C14H26O | 210    |
| 3   | 1,2-Cyclopentanediol, 3-methyl-            | 826        | 272         | 27583-37-5 | mainlib | C6H12O2 | 116    |
| 4   | Ether, tert-butyl isopropylidencyclopropyl | 795        | 74          | 24524-56-9 | mainlib | C10H18O | 154    |
| 5   | 1-Hexene, 2,4,4-triethyl-                  | 783        | 49          | 0-00-0     | mainlib | C12H24  | 168    |

## 3-Phenylpyrazin-2-ol

1st Dimension R.T. = 1676.32  
2nd Dimension R.T. = 2.812  
Quant Mass(es) = 172  
S/N = 1744.4  
Area = 560231  
Height = 46101  
Similarity = 880

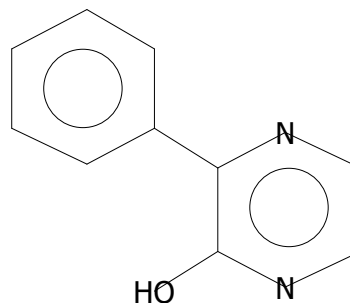

Peak Apex - sample "AnMbr C (20191120):1", peak 5598, at 1676.32 , 2.812 sec , sec (Spec # 181686)

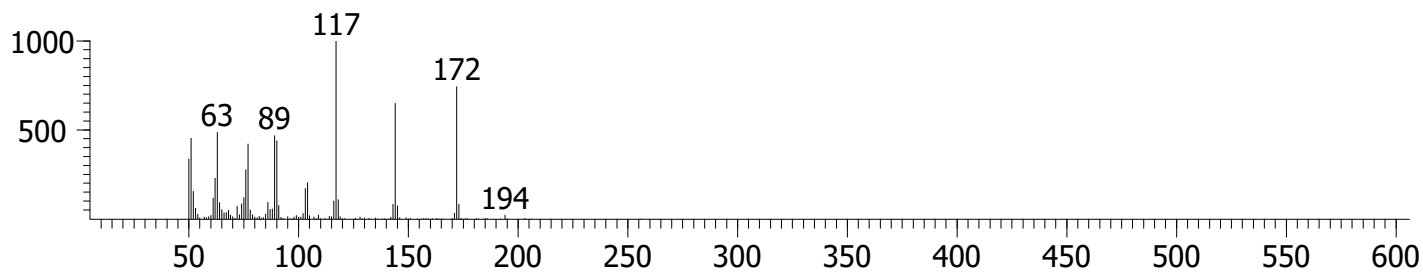

Peak True - sample "AnMbr C (20191120):1", peak 5598, at 1676.32 , 2.812 sec , sec (Spec # 181686)

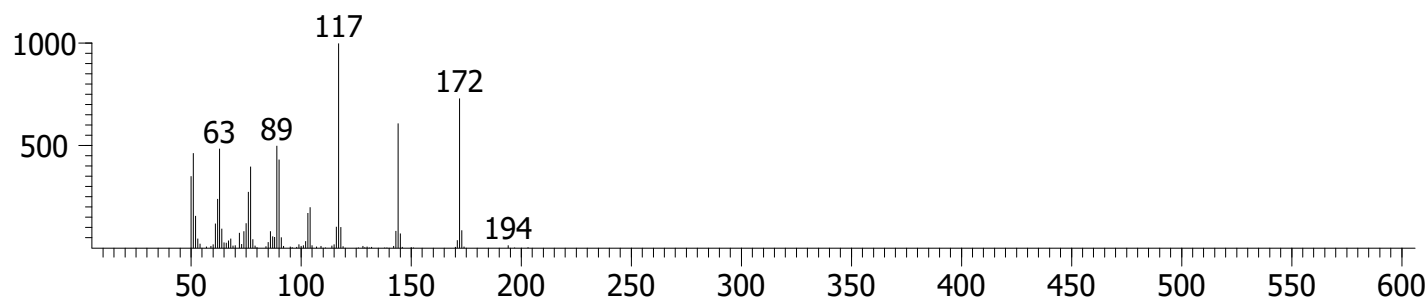

Library Hit - similarity 880, "3-Phenylpyrazin-2-ol"

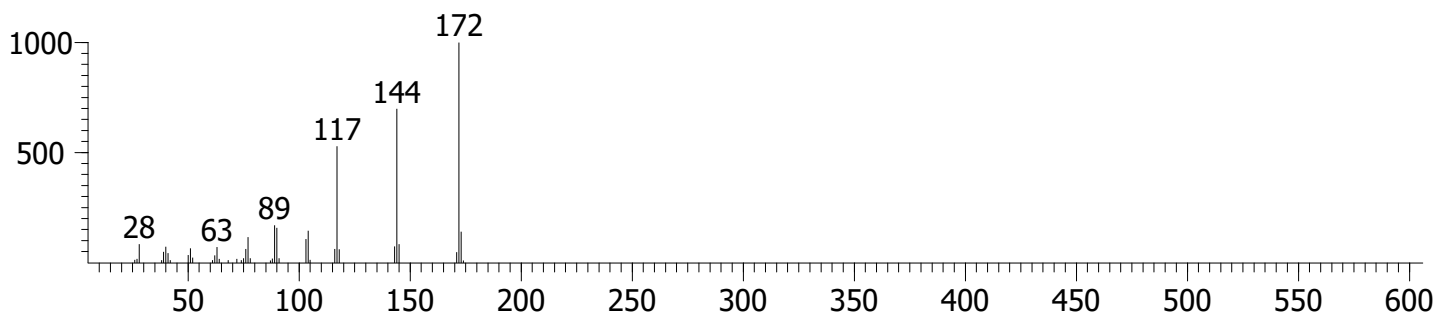

| Hit | Name                                   | Similarity | Probability | CAS         | Library | Formula   | Weight |
|-----|----------------------------------------|------------|-------------|-------------|---------|-----------|--------|
| 1   | 3-Phenylpyrazin-2-ol                   | 880        | 7872        | 73200-73-4  | mainlib | C10H8N2O  | 172    |
| 2   | Pyrazine, 2-hydroxy-5-phenyl-          | 820        | 1397        | 25844-72-8  | mainlib | C10H8N2O  | 172    |
| 3   | 1-Acetyl-2-phenylimidazole             | 768        | 279         | 182481-13-6 | mainlib | C11H10N2O | 186    |
| 4   | 1H-Imidazole, 1-phenyl-                | 738        | 77          | 7164-98-9   | mainlib | C9H8N2    | 144    |
| 5   | 1H-Imidazole-2-carbaldehyde, 1-phenyl- | 731        | 59          | 0-00-0      | mainlib | C10H8N2O  | 172    |

## 4-Hexen-2-one, 3-methyl-

1st Dimension R.T. = 595.434

2nd Dimension R.T. = 1.802

Quant Mass(es) = 114

S/N = 69.694

Area = 45939

Height = 5618.6

Similarity = 820

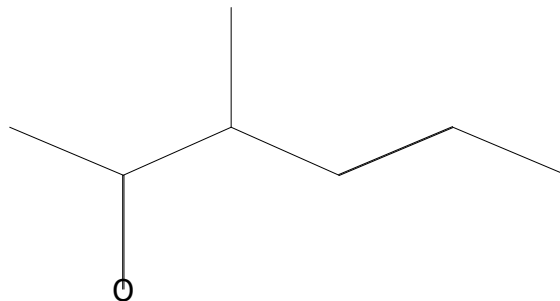

Peak Apex - sample "INF B Comp 091919 (20191122):1", peak 277, at 595.434 , 1.802 sec , sec (Spec # 17763)

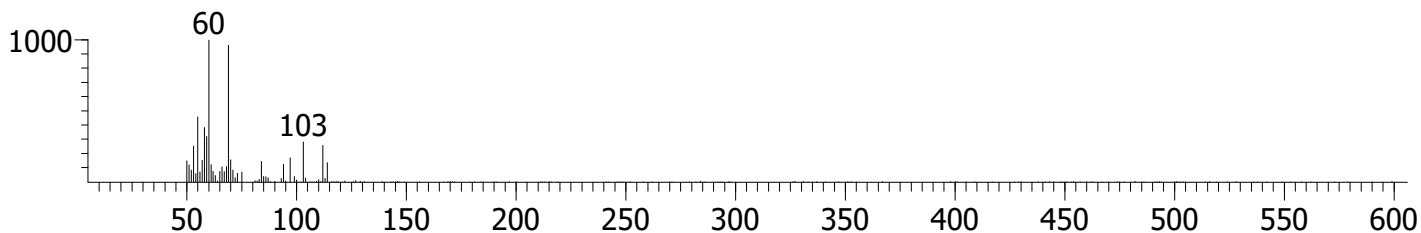

Peak True - sample "INF B Comp 091919 (20191122):1", peak 277, at 595.434 , 1.802 sec , sec (Spec # 17763)

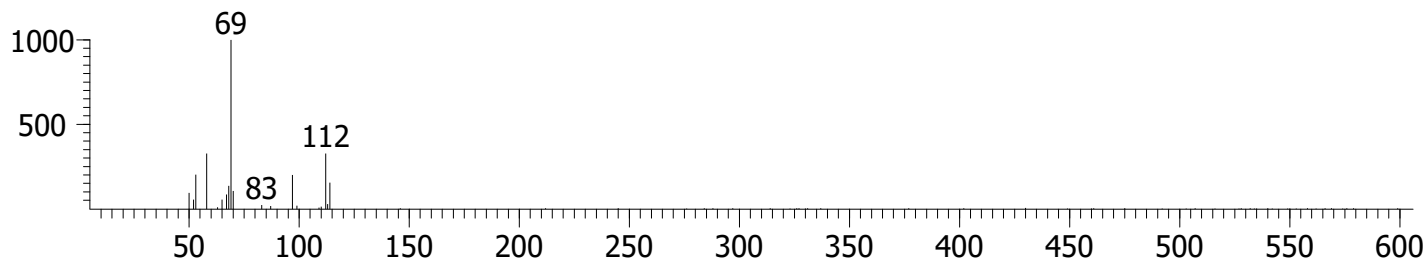

Library Hit - similarity 820, "4-Hexen-2-one, 3-methyl-"

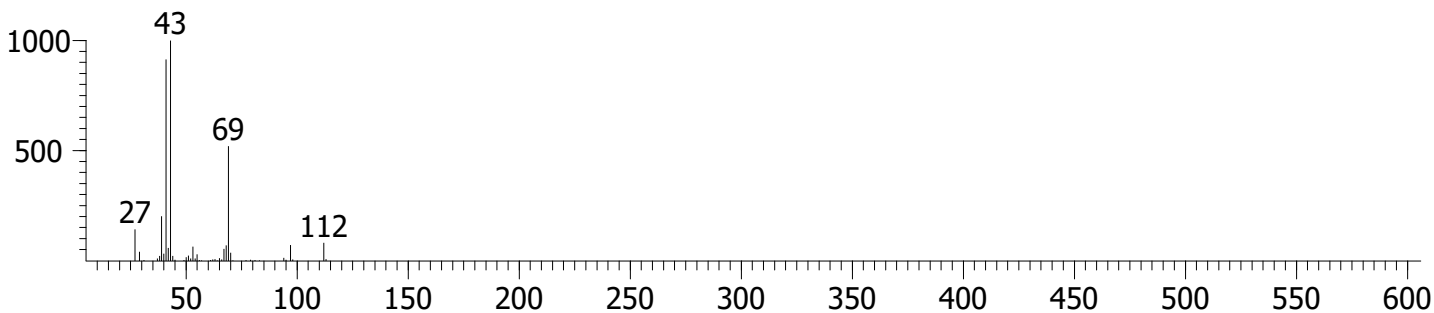

| Hit | Name                                 | Similarity | Probability | CAS        | Library | Formula | Weight |
|-----|--------------------------------------|------------|-------------|------------|---------|---------|--------|
| 1   | 4-Hexen-2-one, 3-methyl-             | 820        | 6670        | 72189-24-3 | mainlib | C7H12O  | 112    |
| 2   | 2-Furanone, 2,5-dihydro-3,5-dimethyl | 780        | 1547        | 0-00-0     | mainlib | C6H8O2  | 112    |
| 3   | 3-Penten-2-one, 3,4-dimethyl-        | 765        | 937         | 684-94-6   | mainlib | C7H12O  | 112    |
| 4   | 5-Hexen-2-one, 5-methyl-             | 718        | 196         | 3240-09-3  | mainlib | C7H12O  | 112    |
| 5   | 3-Hexen-2-one, 3-methyl-             | 716        | 180         | 1187-80-0  | mainlib | C7H12O  | 112    |

## 2-Decanone

1st Dimension R.T. = 707.37

2nd Dimension R.T. = 1.366

Quant Mass(es) = 58

S/N = 10416

Area = 3539591

Height = 524926

Similarity = 940

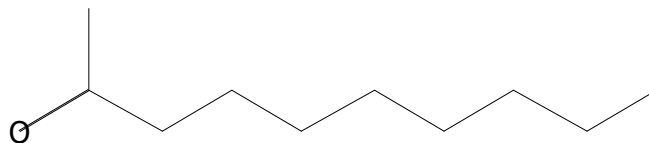

Peak Apex - sample "INF B Comp 091919 (20191122):1", peak 601, at 707.37 , 1.366 sec , sec (Spec # 34657)

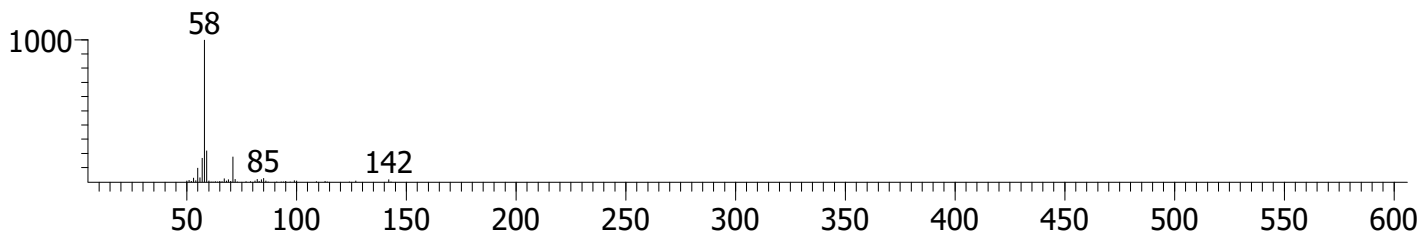

Peak True - sample "INF B Comp 091919 (20191122):1", peak 601, at 707.37 , 1.366 sec , sec (Spec # 34657)

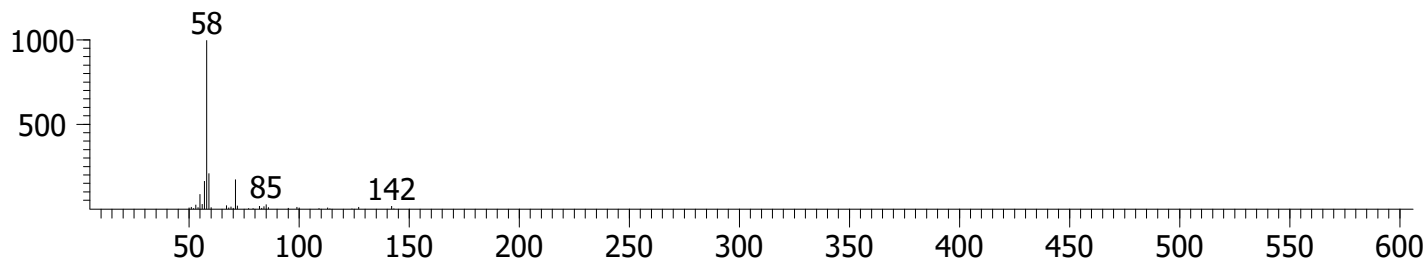

Library Hit - similarity 940, "2-Decanone"

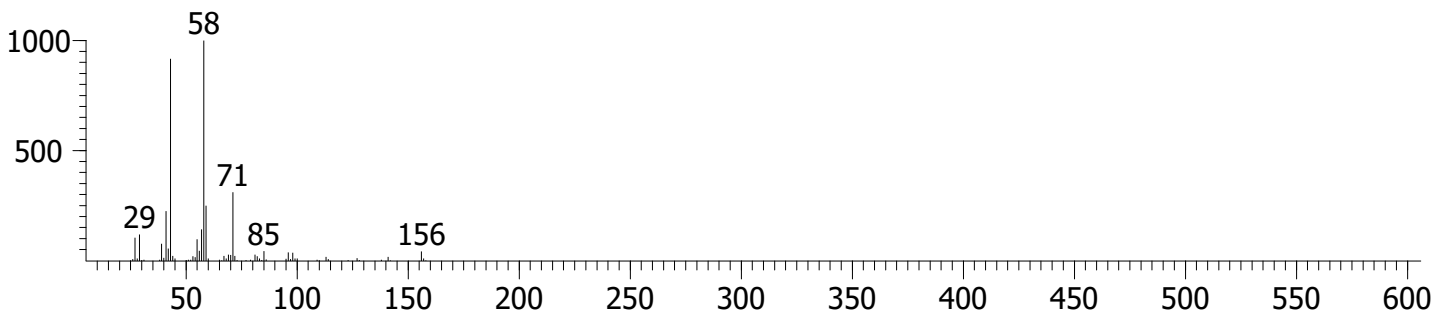

| Hit | Name                  | Similarity | Probability | CAS       | Library | Formula | Weight |
|-----|-----------------------|------------|-------------|-----------|---------|---------|--------|
| 1   | 2-Decanone            | 940        | 3625        | 693-54-9  | mainlib | C10H20O | 156    |
| 2   | 2-Hexanone, 5-methyl- | 922        | 1869        | 110-12-3  | mainlib | C7H14O  | 114    |
| 3   | 2-Dodecanone          | 911        | 1282        | 6175-49-1 | mainlib | C12H24O | 184    |
| 4   | 2-Octanone            | 896        | 777         | 111-13-7  | mainlib | C8H16O  | 128    |
| 5   | 2-Nonanone            | 896        | 777         | 821-55-6  | mainlib | C9H18O  | 142    |

# Linalool

1st Dimension R.T. = 721.362  
2nd Dimension R.T. = 1.386  
Quant Mass(es) = 71  
S/N = 24255  
Area = 13212837  
Height = 1660846  
Similarity = 931

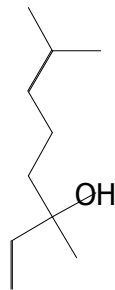

Peak Apex - sample "INF B Comp 091919 (20191122):1", peak 647, at 721.362 , 1.386 sec , sec (Spec # 36780)

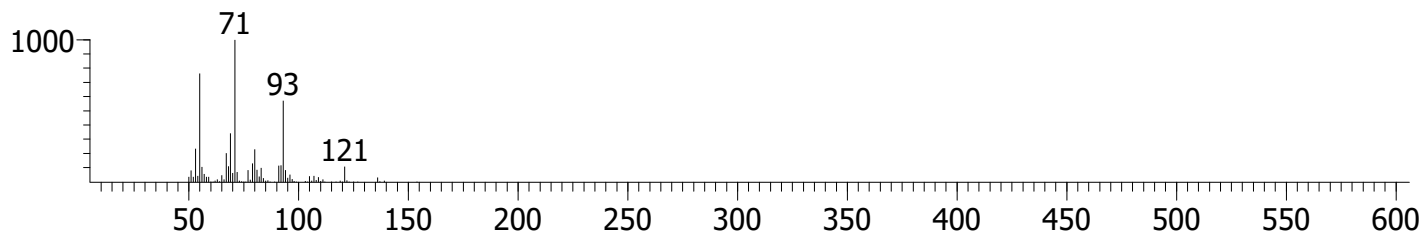

Peak True - sample "INF B Comp 091919 (20191122):1", peak 647, at 721.362 , 1.386 sec , sec (Spec # 36780)

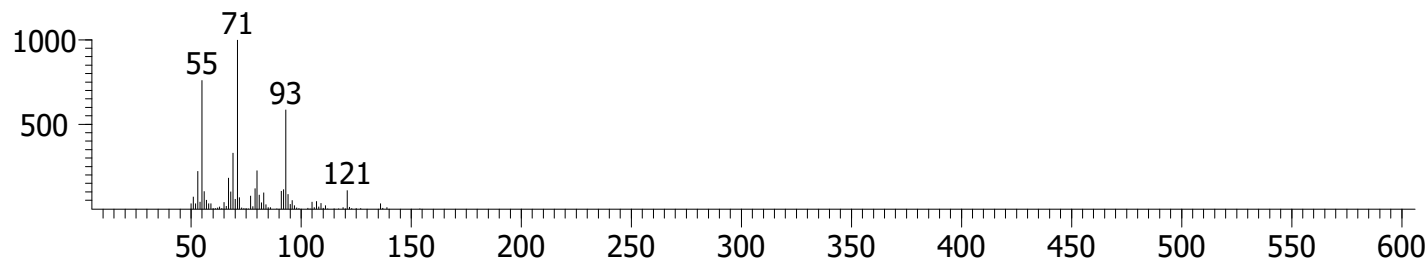

Library Hit - similarity 931, "Linalool"

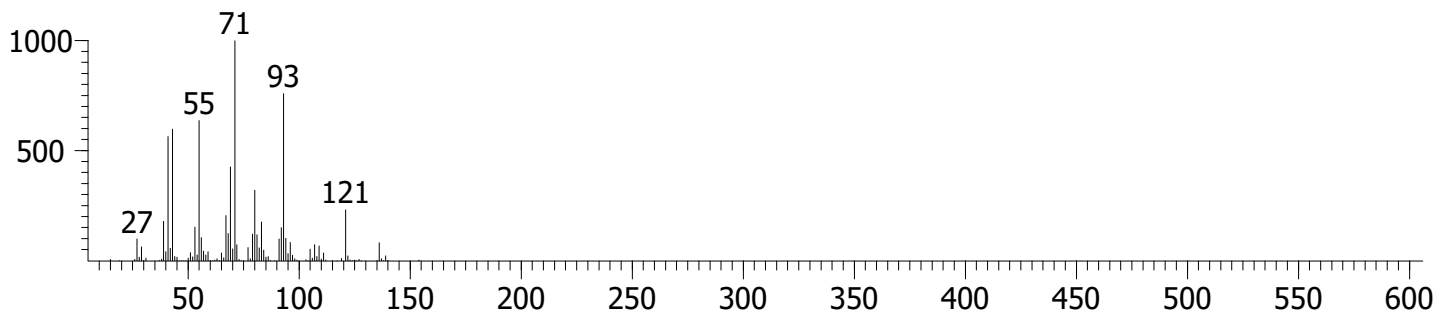

| Hit | Name                                      | Similarity | Probability | CAS      | Library | Formula  | Weight |
|-----|-------------------------------------------|------------|-------------|----------|---------|----------|--------|
| 1   | Linalool                                  | 931        | 8537        | 78-70-6  | mainlib | C10H18O  | 154    |
| 2   | (-)-Isopinocampheol, 2-methylpropionate   | 800        | 348         | 0-00-0   | mainlib | C14H24O2 | 224    |
| 3   | 1,6-Octadien-3-ol, 3,7-dimethyl-, formate | 794        | 273         | 115-99-1 | mainlib | C11H18O2 | 182    |
| 4   | Ethylinalool                              | 785        | 198         | 0-00-0   | mainlib | C11H20O  | 168    |
| 5   | Linalyl acetate                           | 775        | 140         | 115-95-7 | mainlib | C12H20O2 | 196    |

## 2(3H)-Furanone, 5-acetyldihydro-

1st Dimension R.T. = 770.334

2nd Dimension R.T. = 2.343

Quant Mass(es) = 85

S/N = 1249.4

Area = 548976

Height = 54850

Similarity = 937

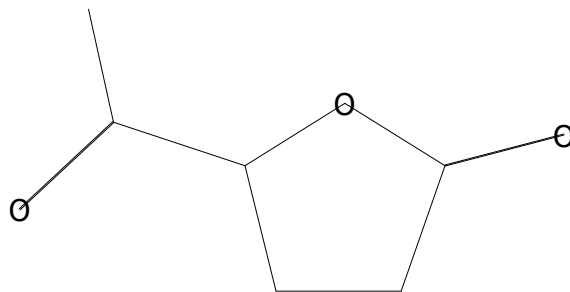

Peak Apex - sample "INF B Comp 091919 (20191122):1", peak 808, at 770.334 , 2.343 sec , sec (Spec # 443 45)

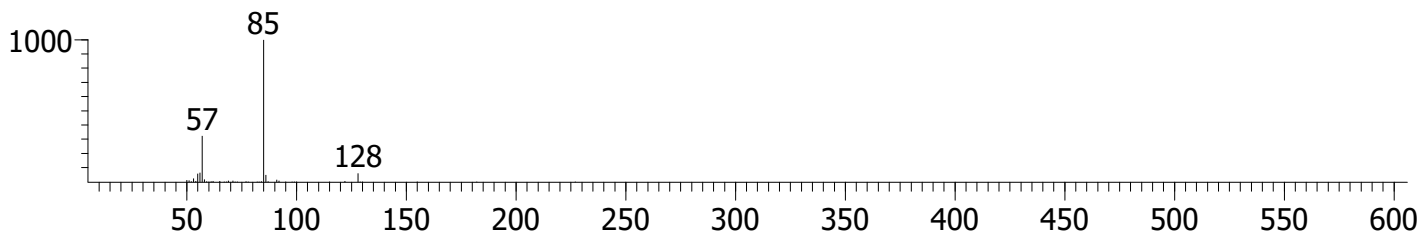

Peak True - sample "INF B Comp 091919 (20191122):1", peak 808, at 770.334 , 2.343 sec , sec (Spec # 4434 5)

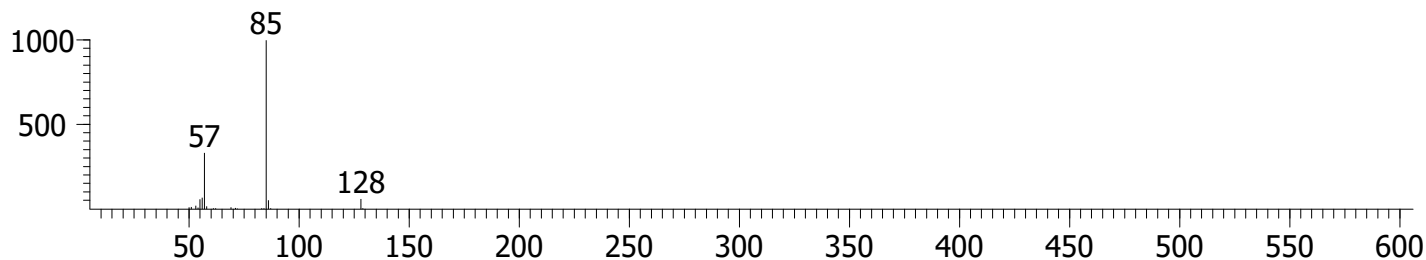

Library Hit - similarity 937, "2(3H)-Furanone, 5-acetyldihydro-"

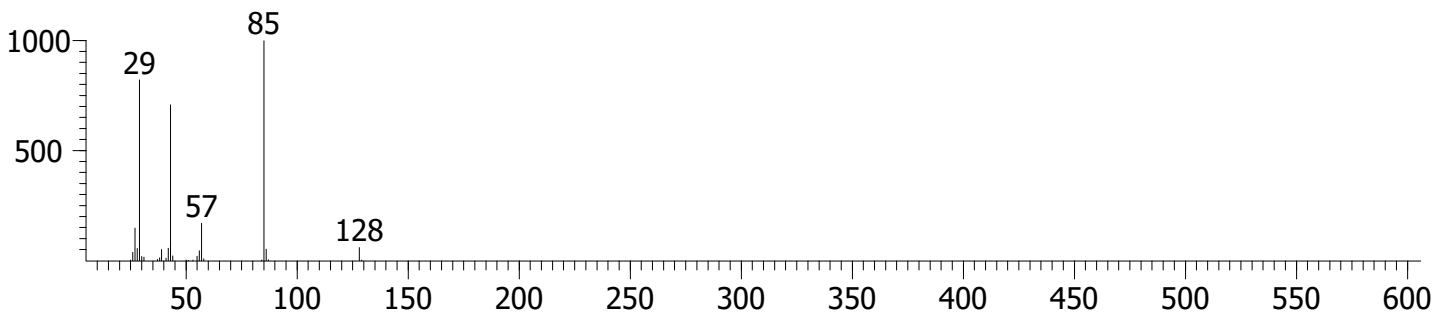

| Hit | Name                                          | Similarity | Probability | CAS        | Library | Formula                                        | Weight |
|-----|-----------------------------------------------|------------|-------------|------------|---------|------------------------------------------------|--------|
| 1   | 2(3H)-Furanone, 5-acetyldihydro-              | 937        | 5141        | 29393-32-6 | mainlib | C <sub>6</sub> H <sub>8</sub> O <sub>3</sub>   | 128    |
| 2   | Valeric anhydride                             | 890        | 1075        | 2082-59-9  | mainlib | C <sub>10</sub> H <sub>18</sub> O <sub>3</sub> | 186    |
| 3   | 2-Furanmethanol, tetrahydro-5-methyl-, trans- | 886        | 908         | 54774-28-6 | mainlib | C <sub>6</sub> H <sub>12</sub> O <sub>2</sub>  | 116    |
| 4   | Ethanone, 1-(3-methyloxiranyl)-               | 866        | 413         | 17257-79-3 | mainlib | C <sub>5</sub> H <sub>8</sub> O <sub>2</sub>   | 100    |
| 5   | Furfuryl alcohol, tetrahydro-5-methyl-, cis-  | 863        | 365         | 16015-08-0 | mainlib | C <sub>6</sub> H <sub>12</sub> O <sub>2</sub>  | 116    |

## Amyl cyclopentenone

1st Dimension R.T. = 1064.17

2nd Dimension R.T. = 1.861

Quant Mass(es) = 84

S/N = 1113.2

Area = 317416

Height = 36654

Similarity = 719

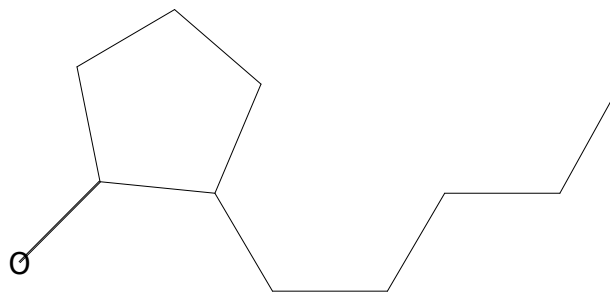

Peak Apex - sample "INF B Comp 091919 (20191122):1", peak 2120, at 1064.17 , 1.861 sec , sec (Spec # 88792)

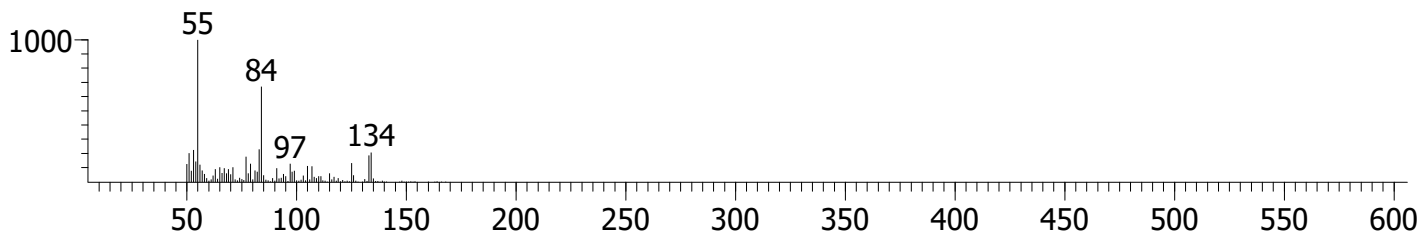

Peak True - sample "INF B Comp 091919 (20191122):1", peak 2120, at 1064.17 , 1.861 sec , sec (Spec # 88792)

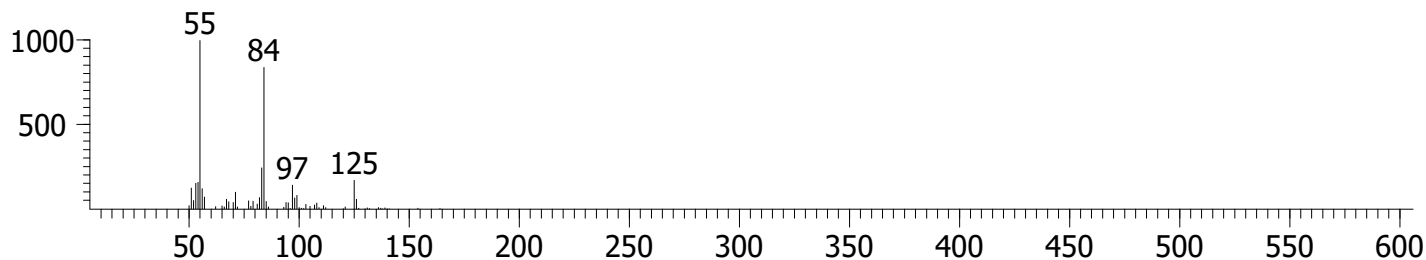

Library Hit - similarity 719, "Amyl cyclopentenone"

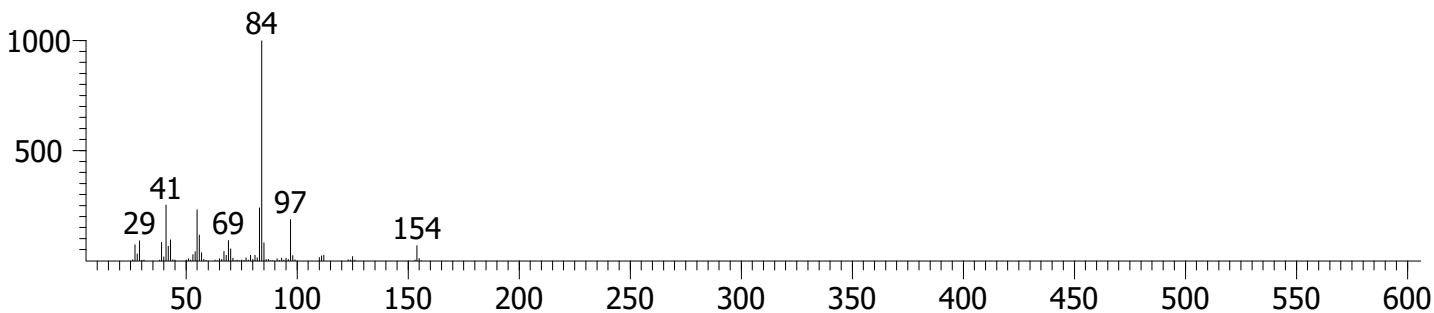

| Hit | Name                                                           | Similarity | Probability | CAS         | Library | Formula  | Weight |
|-----|----------------------------------------------------------------|------------|-------------|-------------|---------|----------|--------|
| 1   | Amyl cyclopentenone                                            | 719        | 963         | 4819-67-4   | mainlib | C10H18O  | 154    |
| 2   | 2,5-Heptadien-4-ol, 3,5-dimethyl-4-[2-(pyrrolidin-1-yl)ethyl]- | 701        | 496         | 178763-04-7 | mainlib | C15H27NO | 237    |
| 3   | cyclopentanone, 2-decyl-                                       | 700        | 477         | 0-00-0      | mainlib | C15H28O  | 224    |
| 4   | Furan, 2,3-dihydro-4-methyl-                                   | 695        | 384         | 34314-83-5  | mainlib | C5H8O    | 84     |
| 5   | 2-Butenal, 2-methyl-, (E)-                                     | 693        | 354         | 497-03-0    | mainlib | C5H8O    | 84     |

## Vanillin

1st Dimension R.T. = 1144.62  
2nd Dimension R.T. = 2.165  
Quant Mass(es) = 151  
S/N = 2875.5  
Area = 690292  
Height = 74211  
Similarity = 931

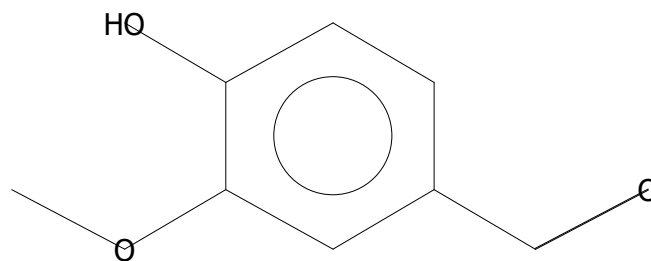

Peak Apex - sample "INF B Comp 091919 (20191122):1", peak 2536, at 1144.62 , 2.165 sec , sec (Spec # 101028)

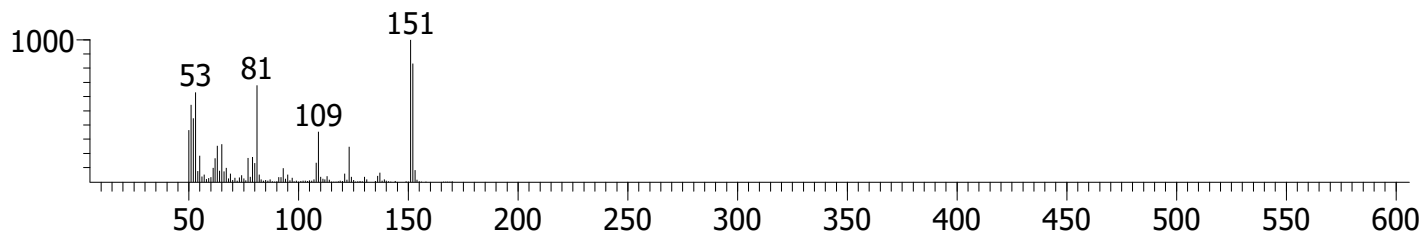

Peak True - sample "INF B Comp 091919 (20191122):1", peak 2536, at 1144.62 , 2.165 sec , sec (Spec # 101028)

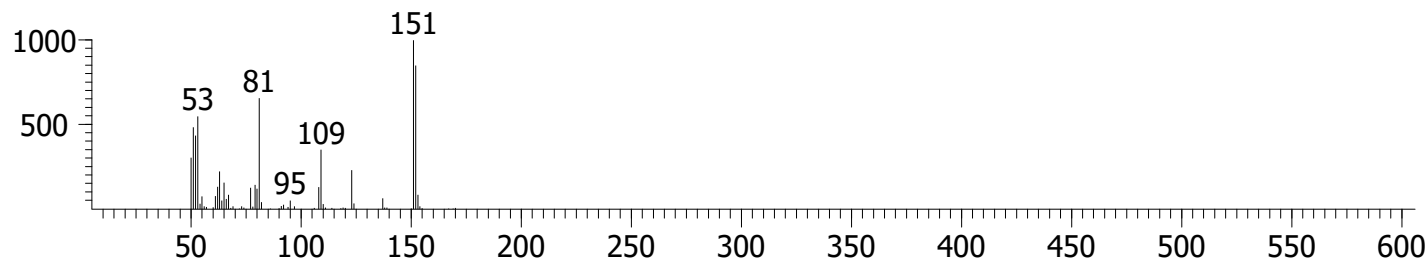

Library Hit - similarity 931, "Vanillin"

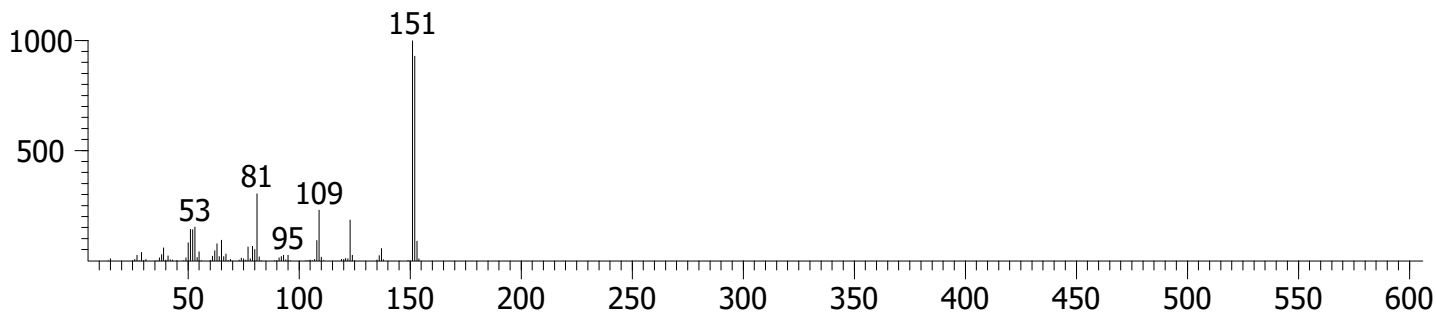

| Hit | Name                                       | Similarity | Probability | CAS        | Library | Formula   | Weight |
|-----|--------------------------------------------|------------|-------------|------------|---------|-----------|--------|
| 1   | Vanillin                                   | 931        | 4492        | 121-33-5   | mainlib | C8H8O3    | 152    |
| 2   | Benzaldehyde, 3-hydroxy-4-methoxy-         | 922        | 3261        | 621-59-0   | mainlib | C8H8O3    | 152    |
| 3   | 3-Methoxy-4-hydroxy mandelonitrile         | 877        | 694         | 0-00-0     | mainlib | C9H9NO3   | 179    |
| 4   | 4-Hydroxy-2-methoxybenzaldehyde            | 877        | 694         | 18278-34-7 | mainlib | C8H8O3    | 152    |
| 5   | Benzaldehyde, 3-(chloroacetoxy)-4-methoxy- | 871        | 546         | 66267-38-7 | mainlib | C10H9ClO4 | 228    |



# Pent-1-yn-3-ene, 4-methyl-3-phenyl-

1st Dimension R.T. = 1176.1  
2nd Dimension R.T. = 1.848  
Quant Mass(es) = 156  
S/N = 304.66  
Area = 38522  
Height = 4787.5  
Similarity = 843

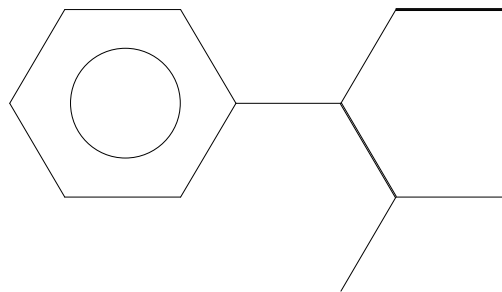

Peak Apex - sample "INF B Comp 091919 (20191122):1", peak 2709, at 1176.1 , 1.848 sec , sec (Spec # 105750)

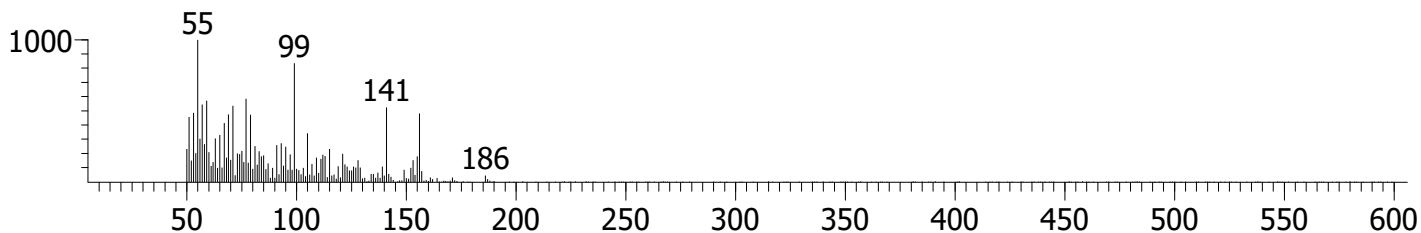

Peak True - sample "INF B Comp 091919 (20191122):1", peak 2709, at 1176.1 , 1.848 sec , sec (Spec # 105750)

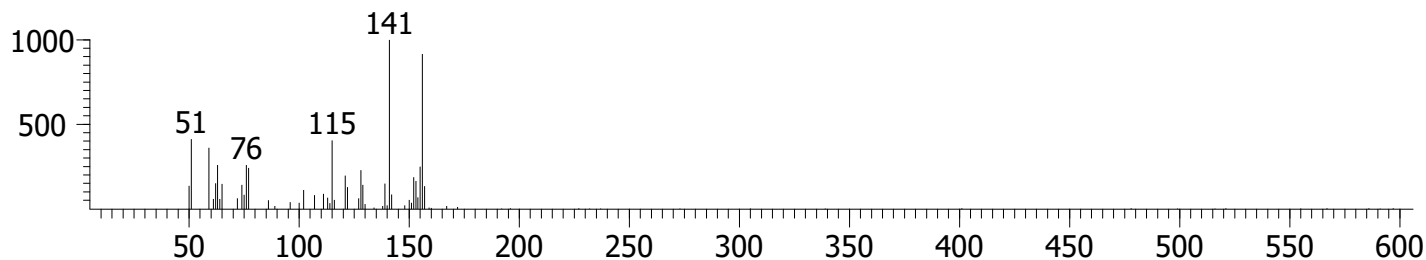

Library Hit - similarity 843, "Pent-1-yn-3-ene, 4-methyl-3-phenyl-"

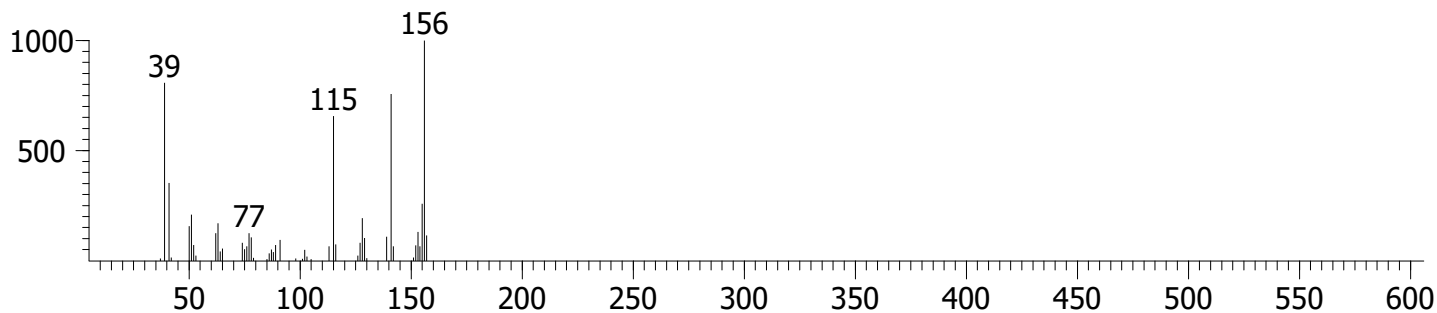

| Hit | Name                                | Similarity | Probability | CAS        | Library | Formula | Weight |
|-----|-------------------------------------|------------|-------------|------------|---------|---------|--------|
| 1   | Pent-1-yn-3-ene, 4-methyl-3-phenyl- | 843        | 4159        | 65050-80-8 | mainlib | C12H12  | 156    |
| 2   | Naphthalene, 2,3-dimethyl-          | 804        | 980         | 581-40-8   | mainlib | C12H12  | 156    |
| 3   | Naphthalene, 1,7-dimethyl-          | 797        | 751         | 575-37-1   | mainlib | C12H12  | 156    |
| 4   | Naphthalene, 2,6-dimethyl-          | 791        | 590         | 581-42-0   | mainlib | C12H12  | 156    |
| 5   | 1,4-Dimethylazulene                 | 786        | 475         | 1127-69-1  | mainlib | C12H12  | 156    |

### 3-tert-Butyl-4-hydroxyanisole

1st Dimension R.T. = 1246.06  
2nd Dimension R.T. = 1.841  
Quant Mass(es) = 137  
S/N = 1570.9  
Area = 240324  
Height = 29692  
Similarity = 884

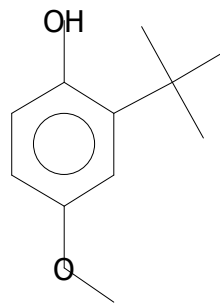

Peak Apex - sample "INF B Comp 091919 (20191122):1", peak 3121, at 1246.06 , 1.841 sec , sec (Spec # 116349)

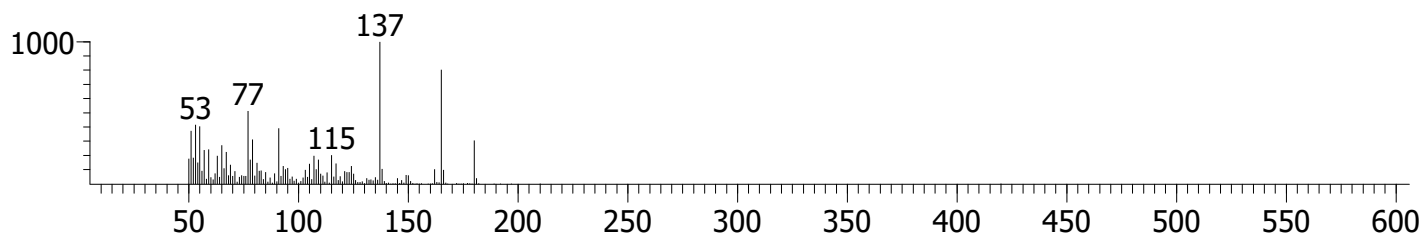

Peak True - sample "INF B Comp 091919 (20191122):1", peak 3121, at 1246.06 , 1.841 sec , sec (Spec # 116349)

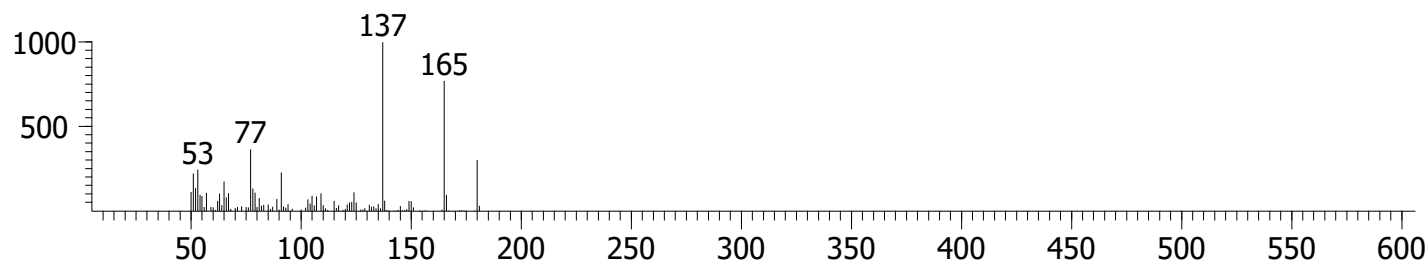

Library Hit - similarity 884, "3-tert-Butyl-4-hydroxyanisole"

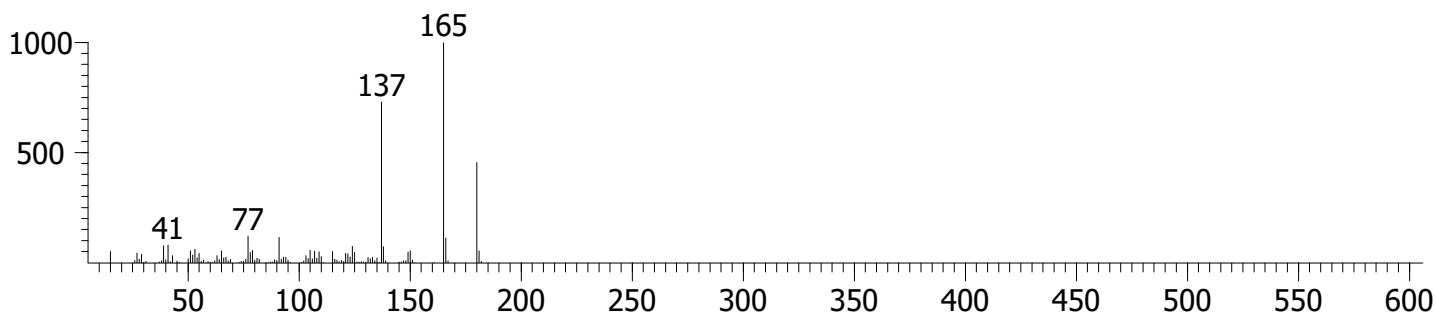

| Hit | Name                                     | Similarity | Probability | CAS        | Library | Formula                                        | Weight |
|-----|------------------------------------------|------------|-------------|------------|---------|------------------------------------------------|--------|
| 1   | 3-tert-Butyl-4-hydroxyanisole            | 884        | 8688        | 121-00-6   | mainlib | C <sub>11</sub> H <sub>16</sub> O <sub>2</sub> | 180    |
| 2   | Phenol, 3-(1,1-dimethylethyl)-4-methoxy- | 771        | 535         | 88-32-4    | mainlib | C <sub>11</sub> H <sub>16</sub> O <sub>2</sub> | 180    |
| 3   | 3-tert-Butyl-4-hydroxyanisole, acetate   | 766        | 431         | 91401-26-2 | mainlib | C <sub>13</sub> H <sub>18</sub> O <sub>3</sub> | 222    |
| 4   | 3-(tert-Butyl)-4-methoxyphenyl acetate   | 711        | 83          | 0-00-0     | mainlib | C <sub>13</sub> H <sub>18</sub> O <sub>3</sub> | 222    |
| 5   | 1-(2,4-Diethoxy-phenyl)-ethanone         | 706        | 67          | 22924-18-1 | mainlib | C <sub>12</sub> H <sub>16</sub> O <sub>3</sub> | 208    |

# Caffeine

1st Dimension R.T. = 1665.82  
 2nd Dimension R.T. = 3.016  
 Quant Mass(es) = 109  
 S/N = 10146  
 Area = 174685496  
 Height = 4821059  
 Similarity = 766

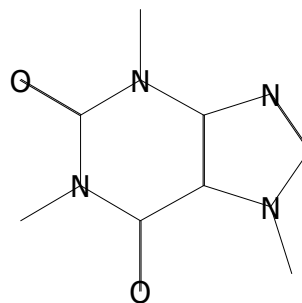

Peak Apex - sample "INF B Comp 091919 (20191122):1", peak 5799, at 1665.82 , 3.016 sec , sec (Spec # 18 0127)

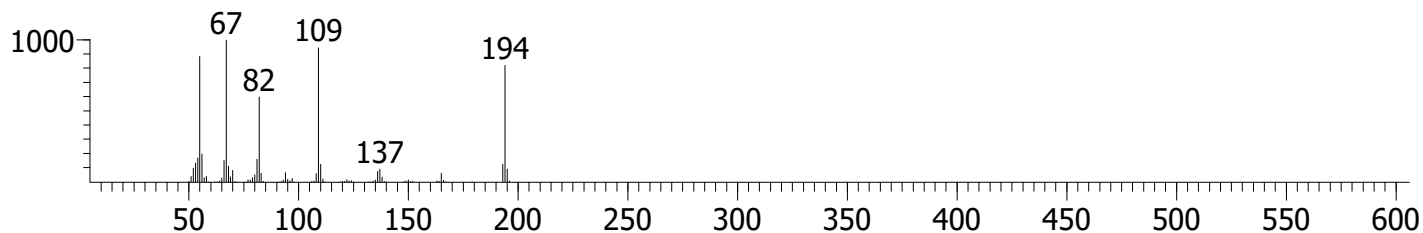

Peak True - sample "INF B Comp 091919 (20191122):1", peak 5799, at 1665.82 , 3.016 sec , sec (Spec # 180 127)

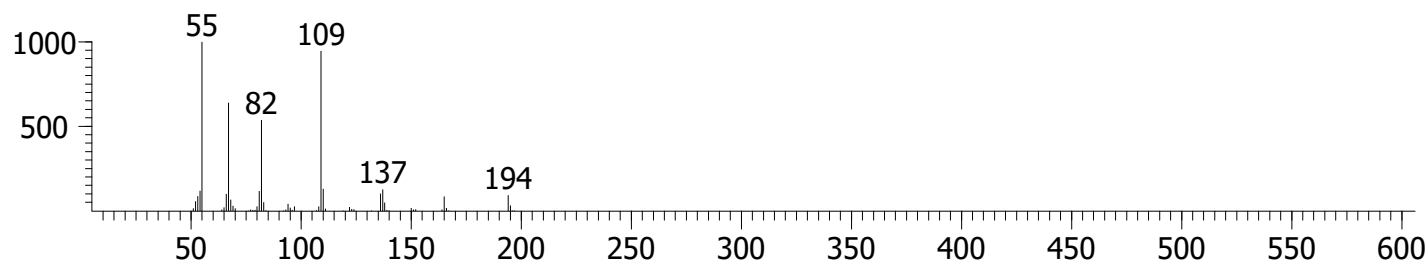

Library Hit - similarity 766, "Caffeine"

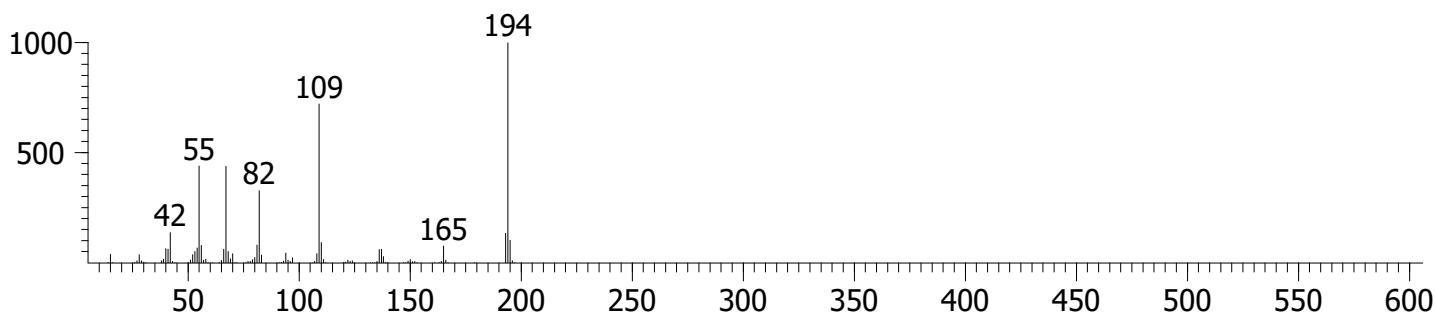

| Hit | Name                             | Similarity | Probability | CAS        | Library | Formula                                                      | Weight |
|-----|----------------------------------|------------|-------------|------------|---------|--------------------------------------------------------------|--------|
| 1   | Caffeine                         | 766        | 7403        | 58-08-2    | mainlib | C <sub>8</sub> H <sub>10</sub> N <sub>4</sub> O <sub>2</sub> | 194    |
| 2   | Cyclooctene,1-(diethylboryl)oxy- | 683        | 725         | 57387-71-0 | mainlib | C <sub>12</sub> H <sub>23</sub> BO                           | 194    |
| 3   | 1-Pyrrolidinylacetonitrile       | 666        | 396         | 29134-29-0 | mainlib | C <sub>6</sub> H <sub>10</sub> N <sub>2</sub>                | 110    |
| 4   | Cyclohexane, decylidene-         | 644        | 156         | 62338-40-3 | mainlib | C <sub>16</sub> H <sub>30</sub>                              | 222    |
| 5   | 2-Amino-4-methylpyrimidine       | 637        | 119         | 108-52-1   | mainlib | C <sub>5</sub> H <sub>7</sub> N <sub>3</sub>                 | 109    |

## Cyclo(L-prolyl-L-valine)

1st Dimension R.T. = 1732.28  
2nd Dimension R.T. = 2.567  
Quant Mass(es) = 154  
S/N = 3069.9  
Area = 641611  
Height = 54280  
Similarity = 836

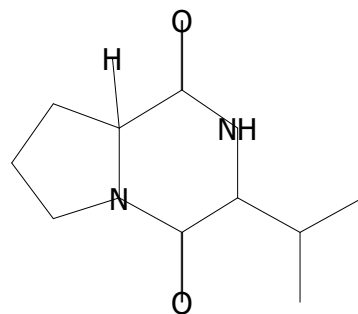

Peak Apex - sample "INF B Comp 091919 (20191122):1", peak 6224, at 1732.28 , 2.567 sec , sec (Spec # 19 0129)

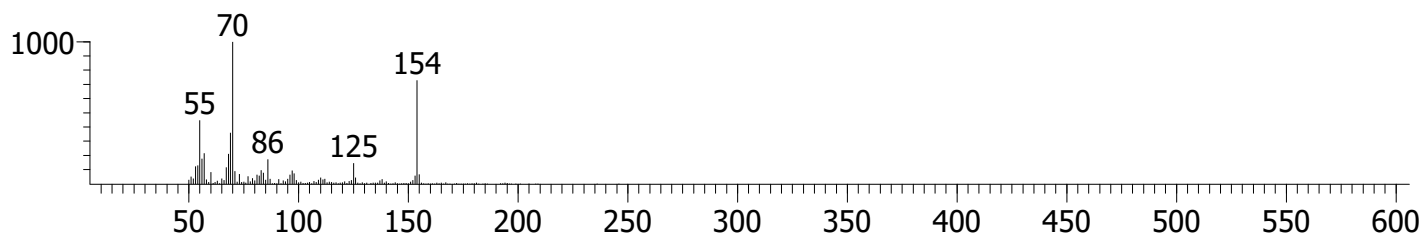

Peak True - sample "INF B Comp 091919 (20191122):1", peak 6224, at 1732.28 , 2.567 sec , sec (Spec # 190 129)

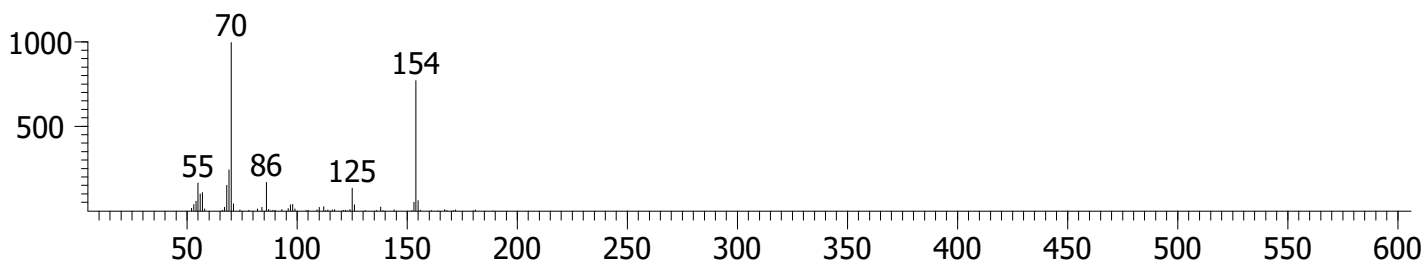

Library Hit - similarity 836, "Cyclo(L-prolyl-L-valine)"

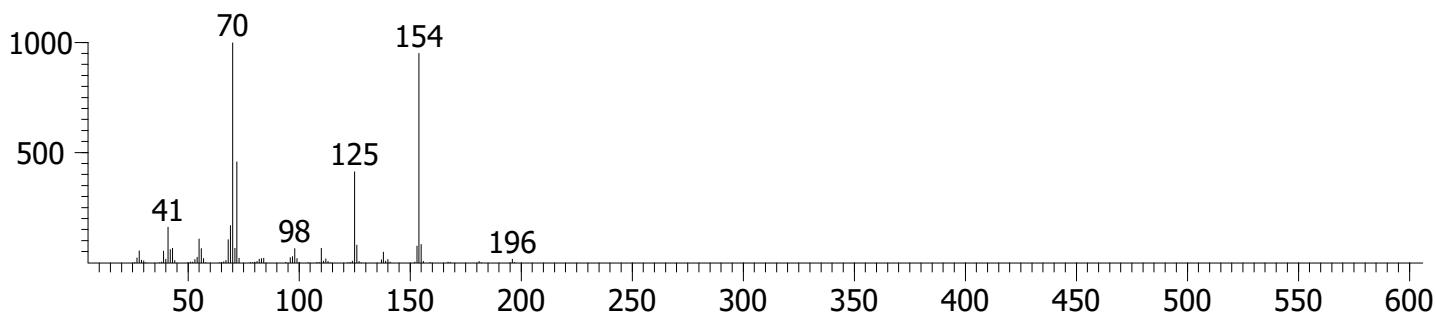

| Hit | Name                                                            | Similarity | Probability | CAS       | Library | Formula    | Weight |
|-----|-----------------------------------------------------------------|------------|-------------|-----------|---------|------------|--------|
| 1   | Cyclo(L-prolyl-L-valine)                                        | 836        | 7232        | 2854-40-2 | mainlib | C10H16N2O2 | 196    |
| 2   | Pyrrolo[1,2-a]pyrazine-1,4-dione, hexahydro-3-(2-methylpropyl)- | 791        | 1540        | 5654-86-4 | mainlib | C11H18N2O2 | 210    |
| 3   | L-Proline, N-valeryl-, pentadecyl ester                         | 723        | 233         | 0-00-0    | mainlib | C25H47NO3  | 409    |
| 4   | L-Proline, N-valeryl-, nonyl ester                              | 712        | 160         | 0-00-0    | mainlib | C19H35NO3  | 325    |
| 5   | L-Proline, N-valeryl-, dodecyl ester                            | 711        | 154         | 0-00-0    | mainlib | C22H41NO3  | 367    |

# Theophylline

1st Dimension R.T. = 1823.23  
 2nd Dimension R.T. = 2.911  
 Quant Mass(es) = 180  
 S/N = 1874.0  
 Area = 669297  
 Height = 50091  
 Similarity = 895

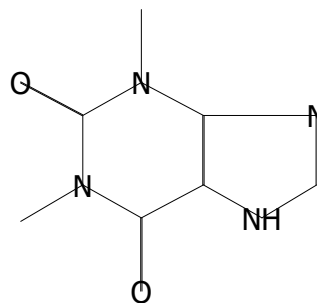

Peak Apex - sample "INF B Comp 091919 (20191122):1", peak 6720, at 1823.23 , 2.911 sec , sec (Spec # 203961)

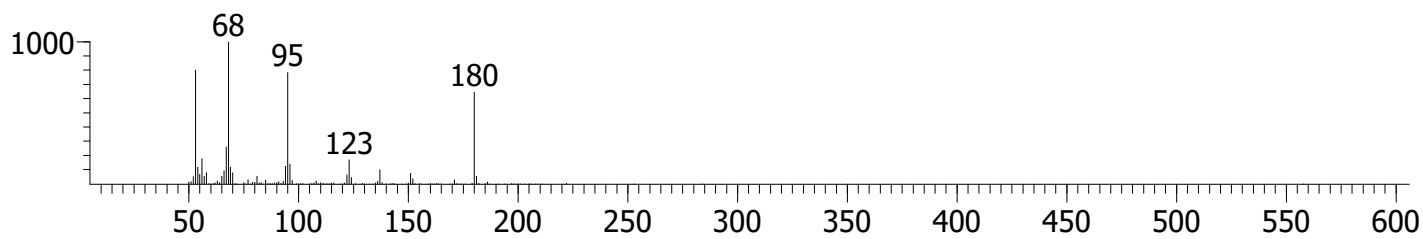

Peak True - sample "INF B Comp 091919 (20191122):1", peak 6720, at 1823.23 , 2.911 sec , sec (Spec # 203961)

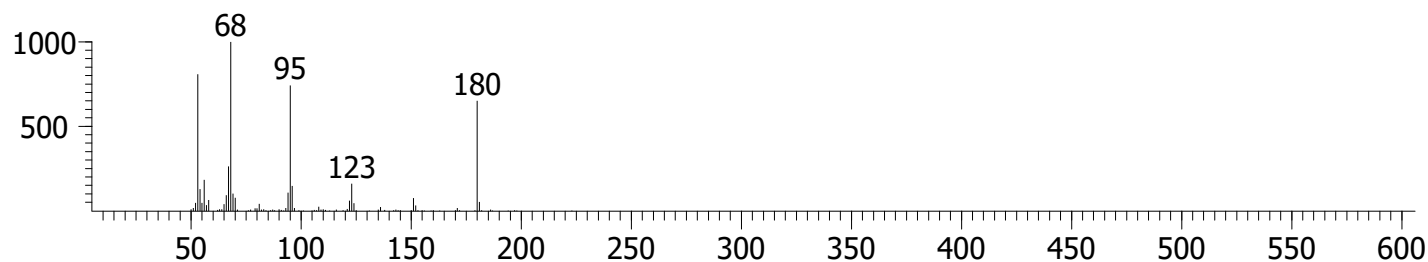

Library Hit - similarity 895, "Theophylline"

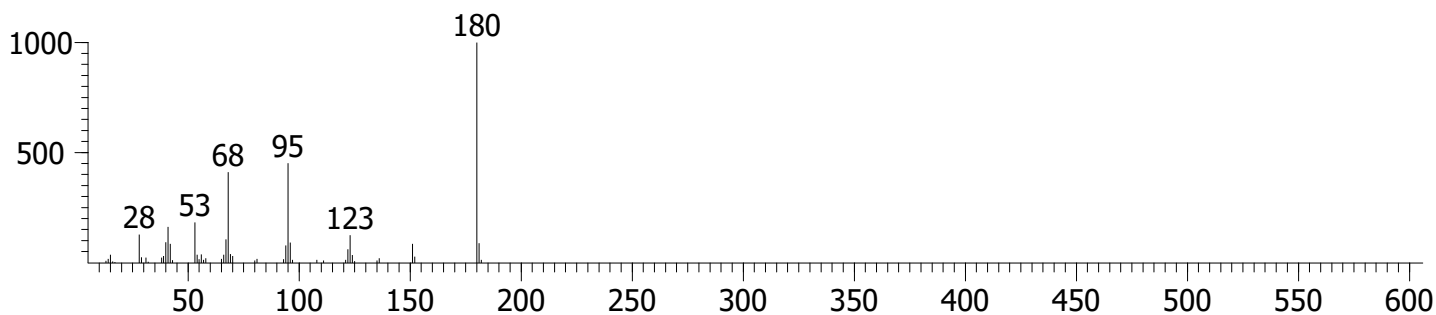

| Hit | Name                                                                                   | Similarity | Probability | CAS      | Library | Formula    | Weight |
|-----|----------------------------------------------------------------------------------------|------------|-------------|----------|---------|------------|--------|
| 1   | Theophylline                                                                           | 895        | 7047        | 58-55-9  | mainlib | C7H8N4O2   | 180    |
| 2   | 7-Acetyl-1,3-dimethyl-1H-purine-2,6(3H,7H)-dione                                       | 857        | 1688        | 0-00-0   | mainlib | C9H10N4O3  | 222    |
| 3   | Theophylline, N-acetyl-                                                                | 845        | 1124        | 0-00-0   | mainlib | C9H10N4O3  | 222    |
| 4   | 7H-Purine-2,6(1H,3H)-dione, 1,3-dimethyl-7-(4-methyl-1,2,5-oxadiazol-3-ylaminomethyl)- | 762        | 110         | 0-00-0   | mainlib | C11H13N7O3 | 291    |
| 5   | 1,7-Dimethylxanthine                                                                   | 694        | 16          | 611-59-6 | mainlib | C7H8N4O2   | 180    |

## Adipic acid, 3-heptyl isobutyl ester

1st Dimension R.T. = 1952.66

2nd Dimension R.T. = 1.736

Quant Mass(es) = 185

S/N = 7898.3

Area = 823894

Height = 79615

Similarity = 842

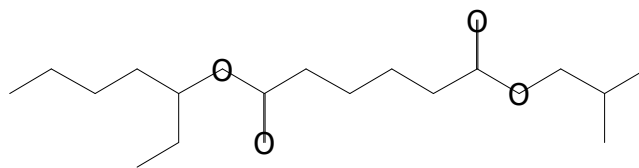

Peak Apex - sample "INF B Comp 091919 (20191122):1", peak 7215, at 1952.66 , 1.736 sec , sec (Spec # 223393)

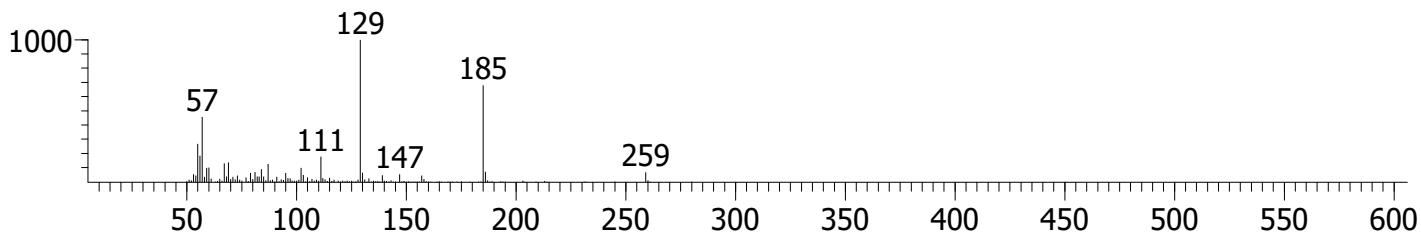

Peak True - sample "INF B Comp 091919 (20191122):1", peak 7215, at 1952.66 , 1.736 sec , sec (Spec # 223393)

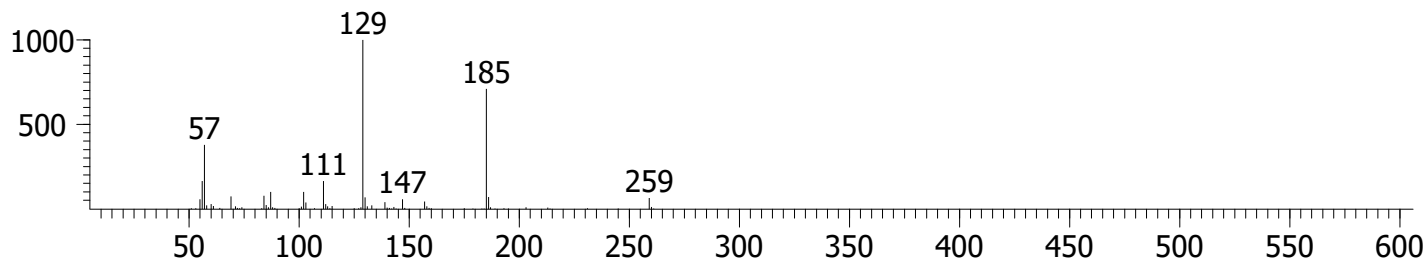

Library Hit - similarity 842, "Adipic acid, 3-heptyl isobutyl ester"

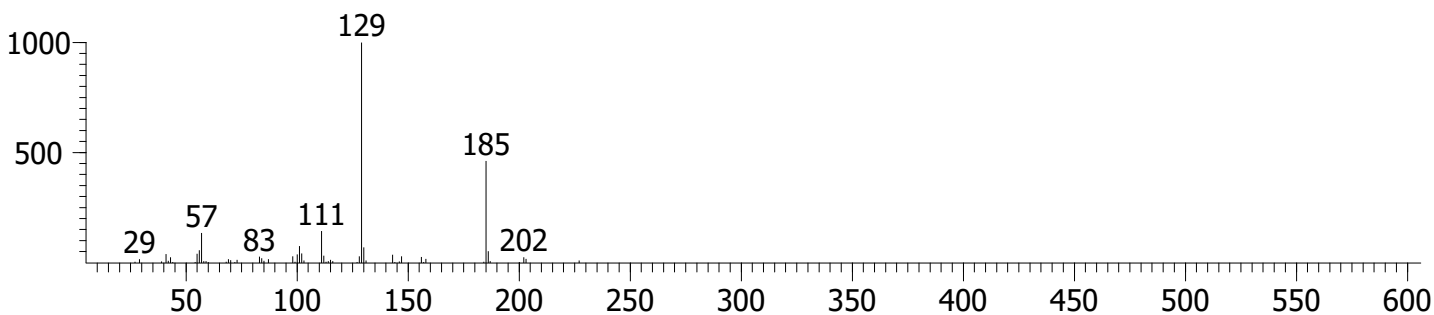

| Hit | Name                                 | Similarity | Probability | CAS    | Library | Formula  | Weight |
|-----|--------------------------------------|------------|-------------|--------|---------|----------|--------|
| 1   | Adipic acid, 3-heptyl isobutyl ester | 842        | 3356        | 0-00-0 | mainlib | C17H32O4 | 300    |
| 2   | Adipic acid, 2-decyl isobutyl ester  | 838        | 2835        | 0-00-0 | mainlib | C20H38O4 | 342    |
| 3   | Adipic acid, 2-heptyl isobutyl ester | 813        | 864         | 0-00-0 | mainlib | C17H32O4 | 300    |
| 4   | Adipic acid, 4-heptyl isobutyl ester | 806        | 662         | 0-00-0 | mainlib | C17H32O4 | 300    |
| 5   | Adipic acid, 2-hexyl isobutyl ester  | 790        | 381         | 0-00-0 | mainlib | C16H30O4 | 286    |

# 1,3,6-Trioxocane, 2-methyl-

1st Dimension R.T. = 507.984  
2nd Dimension R.T. = 1.505  
Quant Mass(es) = 58  
S/N = 151.07  
Area = 104469  
Height = 10621  
Similarity = 896

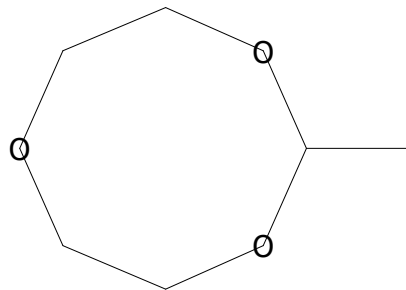

Peak Apex - sample "INF-C comp 091919 (111419):1", peak 41, at 507.984 , 1.505 sec , sec (Spec # 4468)

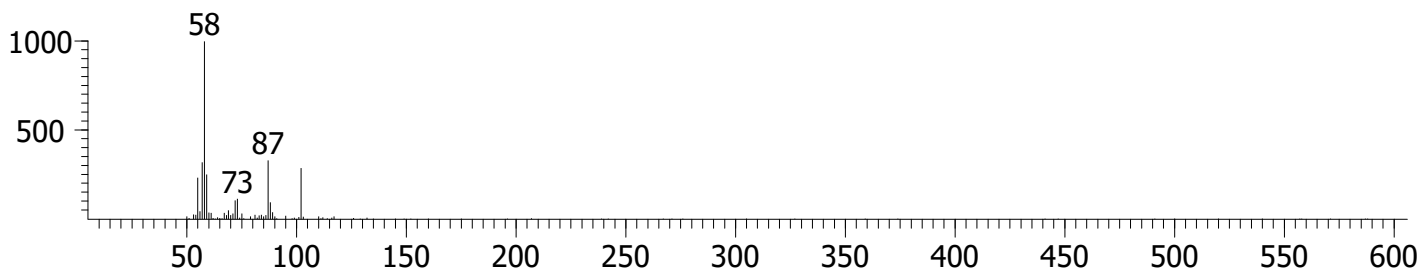

Peak True - sample "INF-C comp 091919 (111419):1", peak 41, at 507.984 , 1.505 sec , sec (Spec # 4468)

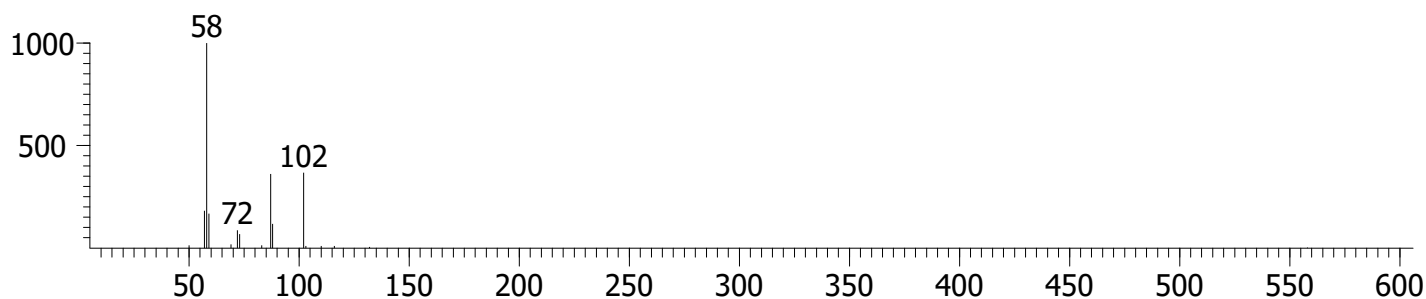

Library Hit - similarity 896, "1,3,6-Trioxocane, 2-methyl-"

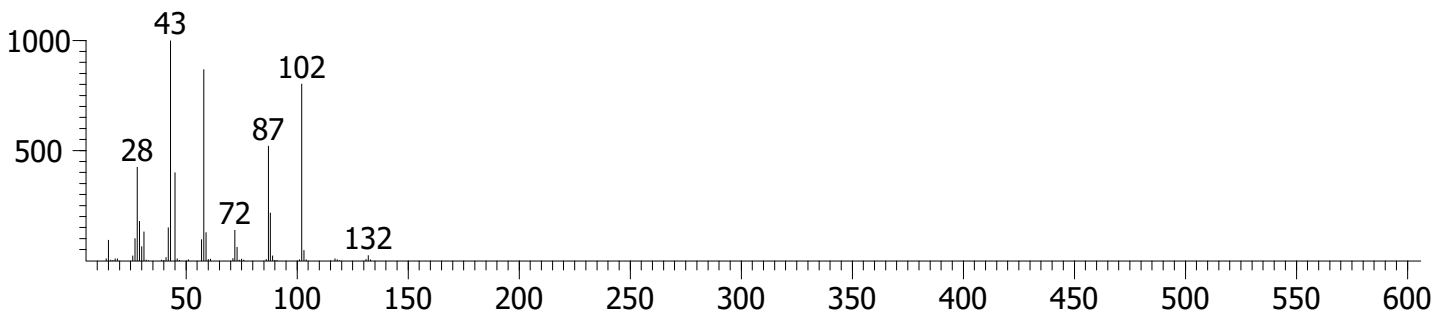

| Hit | Name                                                            | Similarity | Probability | CAS        | Library | Formula   | Weight |
|-----|-----------------------------------------------------------------|------------|-------------|------------|---------|-----------|--------|
| 1   | 1,3,6-Trioxocane, 2-methyl-                                     | 896        | 9402        | 2781-01-3  | mainlib | C6H12O3   | 132    |
| 2   | 3-[Carbamoyl(methyl)amino]propanoic acid                        | 764        | 377         | 72054-55-8 | mainlib | C5H10N2O3 | 146    |
| 3   | 2H-Pyran-3-ol, tetrahydro-6-methoxy-2-methyl-, [2R-(2à,3á,6á)]- | 708        | 71          | 21317-50-0 | mainlib | C7H14O3   | 146    |
| 4   | N,N-Dimethyl-3-isopropoxypropylamine                            | 694        | 45          | 71126-66-4 | mainlib | C8H19NO   | 145    |
| 5   | 3-Cyclohexyloxypropylamine, N,N-dimethyl-                       | 692        | 41          | 71126-67-5 | mainlib | C11H23NO  | 185    |

## Furan, 2-pentyl-

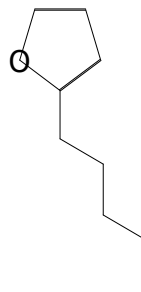

1st Dimension R.T. = 563.952

2nd Dimension R.T. = 1.300

Quant Mass(es) = 81

S/N = 8848.6

Area = 4580066

Height = 756031

Similarity = 875

Peak Apex - sample "INF-C comp 091919 (111419):1", peak 194, at 563.952 , 1.300 sec , sec (Spec # 12917)

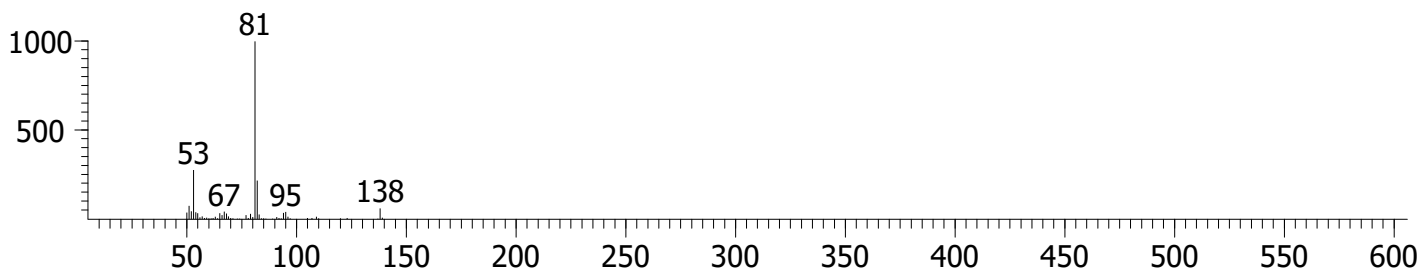

Peak True - sample "INF-C comp 091919 (111419):1", peak 194, at 563.952 , 1.300 sec , sec (Spec # 12917)

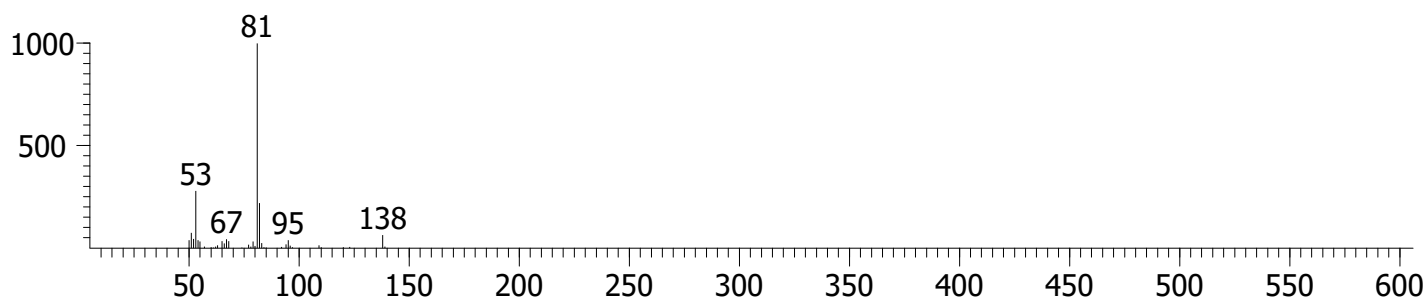

Library Hit - similarity 875, "Furan, 2-pentyl-"

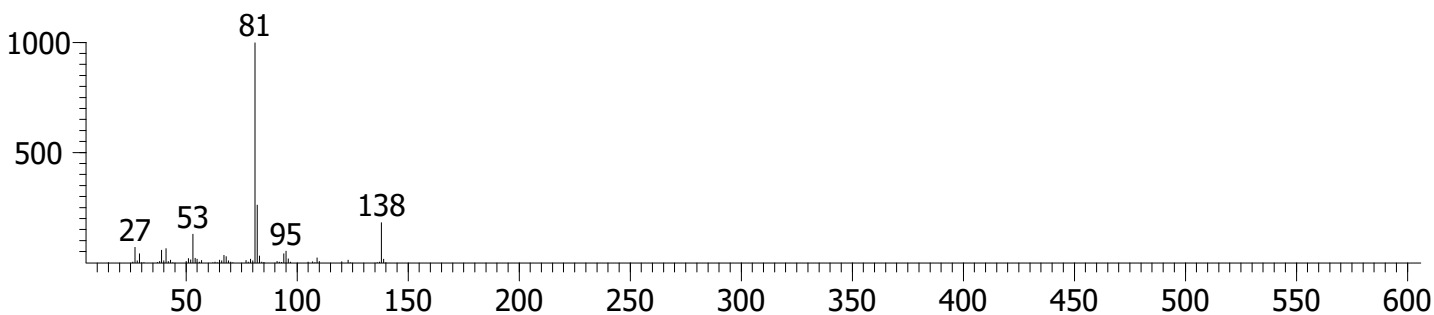

| Hit | Name                                | Similarity | Probability | CAS       | Library | Formula    | Weight |
|-----|-------------------------------------|------------|-------------|-----------|---------|------------|--------|
| 1   | Furan, 2-pentyl-                    | 875        | 2640        | 3777-69-3 | mainlib | C9H14O     | 138    |
| 2   | E-2-Methyl-5-(fur-3-yl)-pent-2-enal | 872        | 2333        | 0-00-0    | mainlib | C10H12O2   | 164    |
| 3   | 2-n-Butyl furan                     | 870        | 2152        | 4466-24-4 | mainlib | C8H12O     | 124    |
| 4   | 2,4-Nonadienal, (E,E)-              | 836        | 551         | 5910-87-2 | mainlib | C9H14O     | 138    |
| 5   | 2-furfuryl 2-oxo-3-pentyl disulfide | 831        | 444         | 0-00-0    | mainlib | C10H14O2S2 | 230    |



# Benzene, 1-methyl-4-(1-methylethenyl)-

1st Dimension R.T. = 707.37  
2nd Dimension R.T. = 1.505  
Quant Mass(es) = 132  
S/N = 10968  
Area = 1267463  
Height = 201699  
Similarity = 966

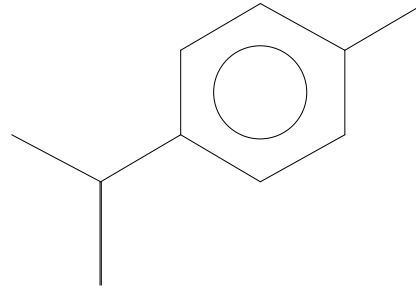

Peak Apex - sample "INF-C comp 091919 (111419):1", peak 569, at 707.37 , 1.505 sec , sec (Spec # 34678)

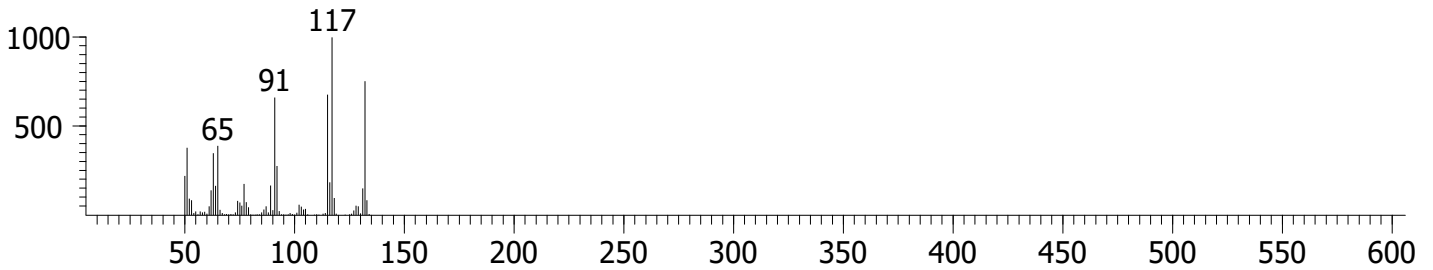

Peak True - sample "INF-C comp 091919 (111419):1", peak 569, at 707.37 , 1.505 sec , sec (Spec # 34678)

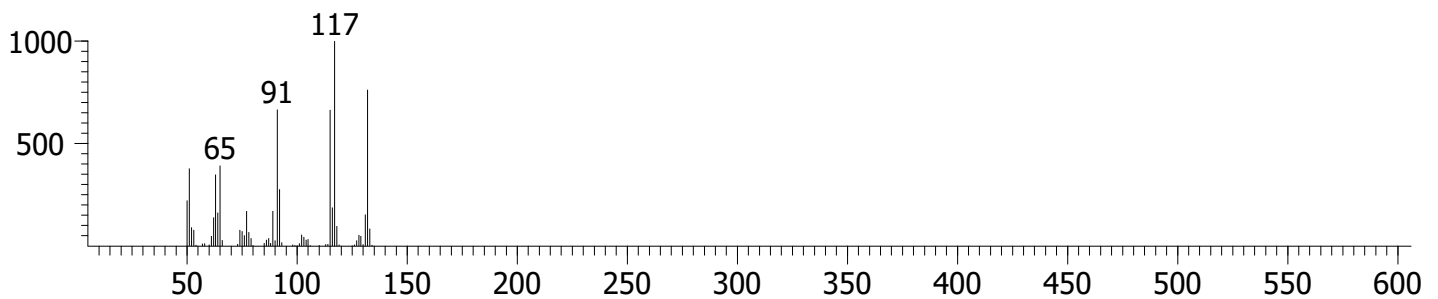

Library Hit - similarity 966, "Benzene, 1-methyl-4-(1-methylethenyl)-"

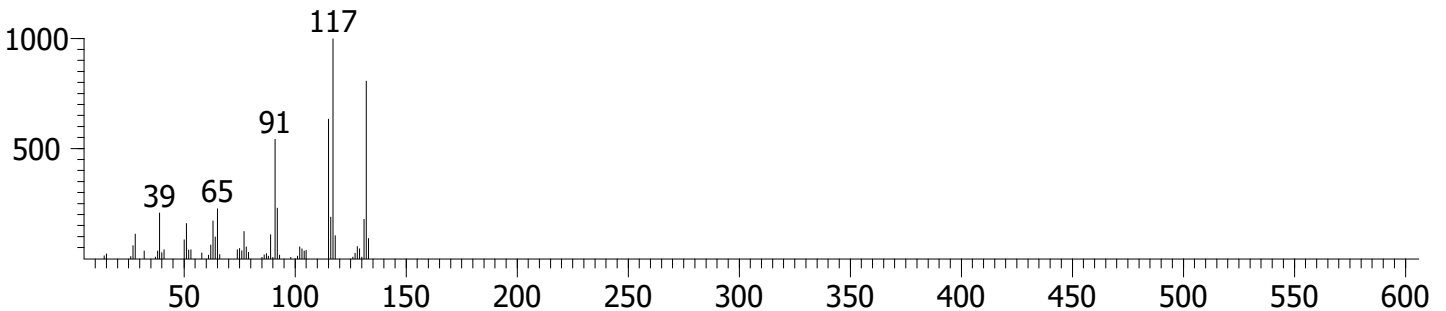

| Hit | Name                                   | Similarity | Probability | CAS       | Library | Formula | Weight |
|-----|----------------------------------------|------------|-------------|-----------|---------|---------|--------|
| 1   | Benzene, 1-methyl-4-(1-methylethenyl)- | 966        | 4285        | 1195-32-0 | mainlib | C10H12  | 132    |
| 2   | o-Isopropenyltoluene                   | 956        | 3025        | 7399-49-7 | mainlib | C10H12  | 132    |
| 3   | p-(1-Propenyl)-toluene                 | 924        | 808         | 0-00-0    | mainlib | C10H12  | 132    |
| 4   | Benzene, 1-methyl-3-(1-methylethenyl)- | 919        | 651         | 1124-20-5 | mainlib | C10H12  | 132    |
| 5   | Benzene, (2-methyl-1-propenyl)-        | 886        | 170         | 768-49-0  | mainlib | C10H12  | 132    |

# Ethanone, 1-(4-methylphenyl)-

1st Dimension R.T. = 847.29  
2nd Dimension R.T. = 1.835  
Quant Mass(es) = 119  
S/N = 2224.5  
Area = 802770  
Height = 97042  
Similarity = 881

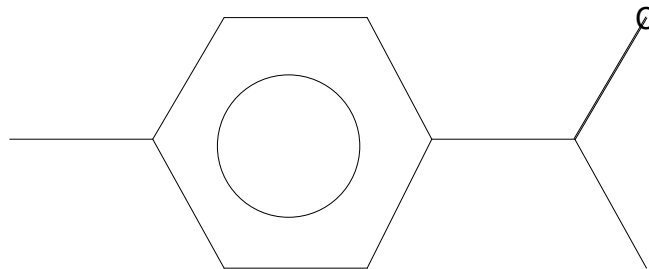

Peak Apex - sample "INF-C comp 091919 (111419):1", peak 1021, at 847.29 , 1.835 sec , sec (Spec # 55928)

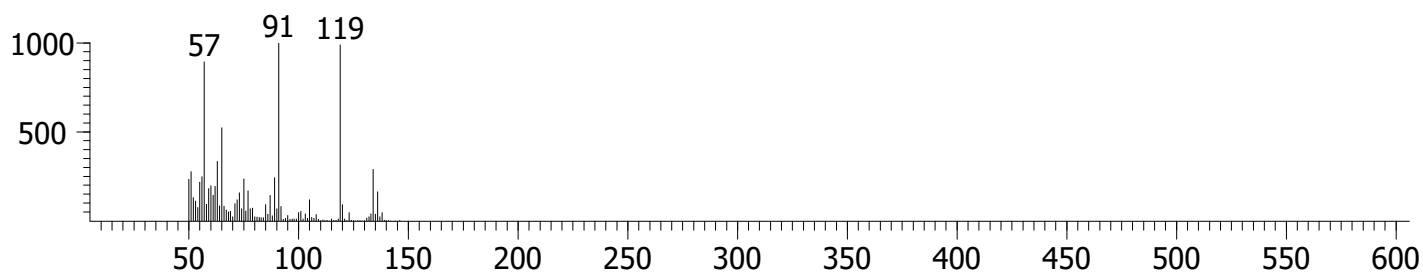

Peak True - sample "INF-C comp 091919 (111419):1", peak 1021, at 847.29 , 1.835 sec , sec (Spec # 55928)

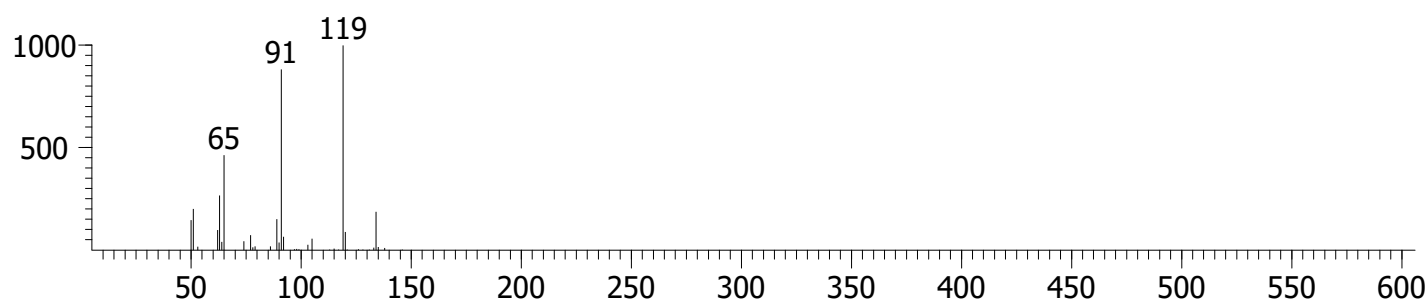

Library Hit - similarity 881, "Ethanone, 1-(4-methylphenyl)-"

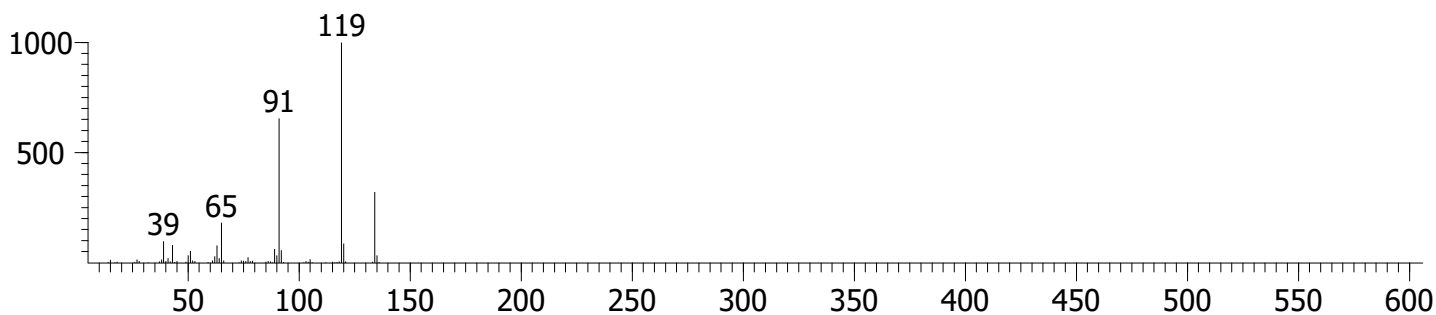

| Hit | Name                           | Similarity | Probability | CAS        | Library | Formula                           | Weight |
|-----|--------------------------------|------------|-------------|------------|---------|-----------------------------------|--------|
| 1   | Ethanone, 1-(4-methylphenyl)-  | 881        | 1674        | 122-00-9   | mainlib | C <sub>9</sub> H <sub>10</sub> O  | 134    |
| 2   | Ethanone, 1-(3-methylphenyl)-  | 878        | 1479        | 585-74-0   | mainlib | C <sub>9</sub> H <sub>10</sub> O  | 134    |
| 3   | Ethanone, 1-(2-methylphenyl)-  | 861        | 807         | 577-16-2   | mainlib | C <sub>9</sub> H <sub>10</sub> O  | 134    |
| 4   | 2-fluoro-1-(p-tolyl)ethanone   | 857        | 682         | 0-00-0     | mainlib | C <sub>9</sub> H <sub>9</sub> FO  | 152    |
| 5   | 2-Methylbenzoyl isothiocyanate | 841        | 392         | 28115-85-7 | mainlib | C <sub>9</sub> H <sub>7</sub> NOS | 177    |

## Diphenyl ether

1st Dimension R.T. = 1137.62

2nd Dimension R.T. = 1.967

Quant Mass(es) = 170

S/N = 1185.4

Area = 125146

Height = 14903

Similarity = 826

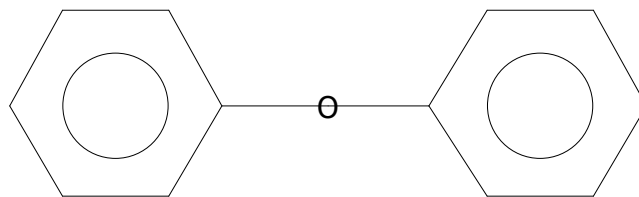

Peak Apex - sample "INF-C comp 091919 (111419):1", peak 2170, at 1137.62 , 1.967 sec , sec (Spec # 99938)

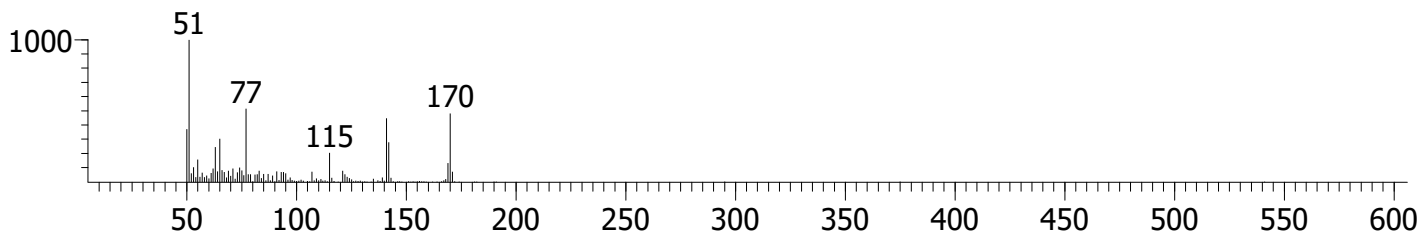

Peak True - sample "INF-C comp 091919 (111419):1", peak 2170, at 1137.62 , 1.967 sec , sec (Spec # 99938)

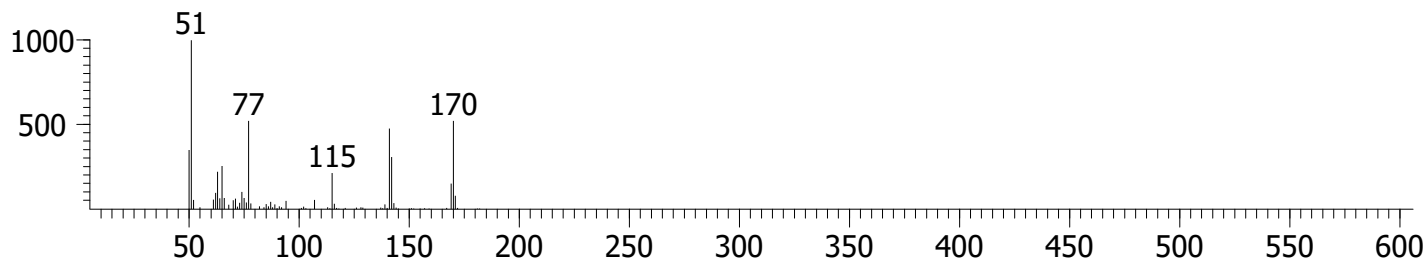

Library Hit - similarity 826, "Diphenyl ether"

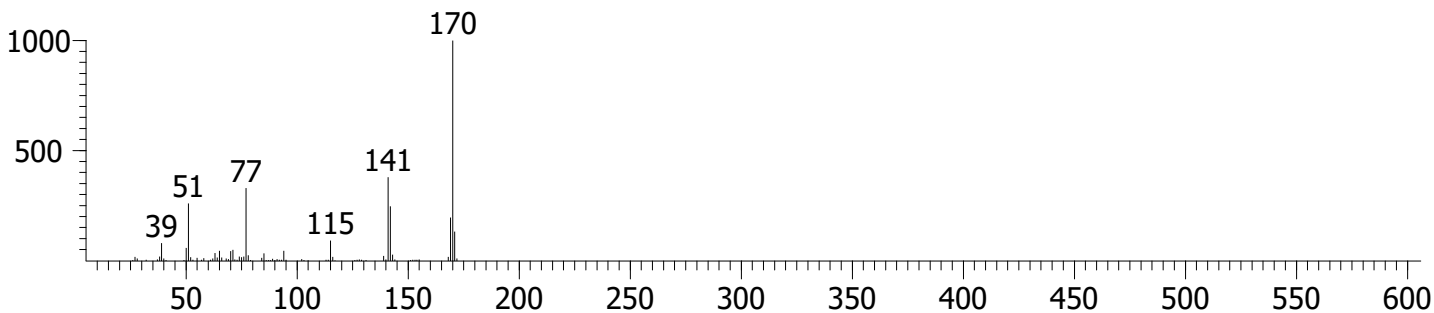

| Hit | Name                                            | Similarity | Probability | CAS        | Library | Formula  | Weight |
|-----|-------------------------------------------------|------------|-------------|------------|---------|----------|--------|
| 1   | Diphenyl ether                                  | 826        | 8352        | 101-84-8   | mainlib | C12H10O  | 170    |
| 2   | Spiro[cyclopropane-1,1'(4'H)-naphthalen]-4'-one | 732        | 684         | 33498-24-7 | mainlib | C12H10O  | 170    |
| 3   | 1H,3H-Naphtho[1,8-cd]pyran                      | 702        | 190         | 203-84-9   | mainlib | C12H10O  | 170    |
| 4   | methanone, 1,3-cyclopentadien-1-ylphenyl-       | 698        | 160         | 0-00-0     | mainlib | C12H10O  | 170    |
| 5   | Diphenyl oxalate                                | 688        | 113         | 3155-16-6  | mainlib | C14H10O4 | 242    |

-Hydroxy-1-methylethyl)-2-methyl-2-cyclohe:

1st Dimension R.T. = 1172.6  
2nd Dimension R.T. = 1.987  
Quant Mass(es) = 59  
S/N = 751.83  
Area = 611723  
Height = 68847  
Similarity = 889

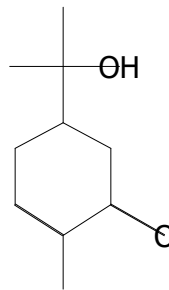

Peak Apex - sample "INF-C comp 091919 (111419):1", peak 2329, at 1172.6 , 1.987 sec , sec (Spec # 105241)

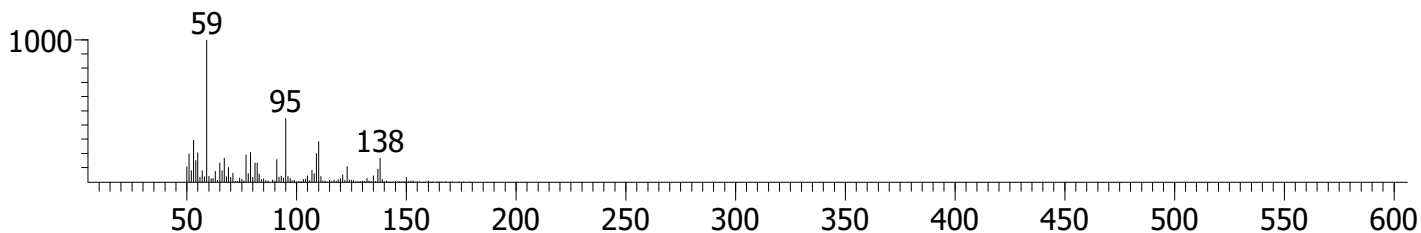

Peak True - sample "INF-C comp 091919 (111419):1", peak 2329, at 1172.6 , 1.987 sec , sec (Spec # 105241)

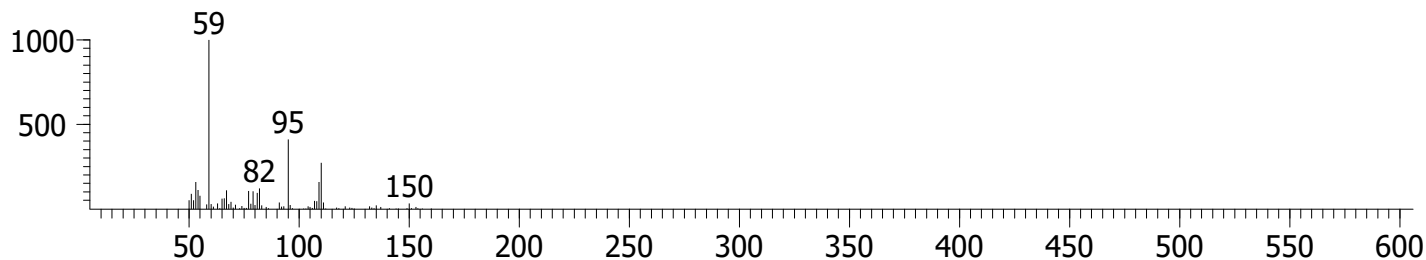

Library Hit - similarity 889, "S-(+)-5-(1-Hydroxy-1-methylethyl)-2-methyl-2-cyclohexen-1-one"

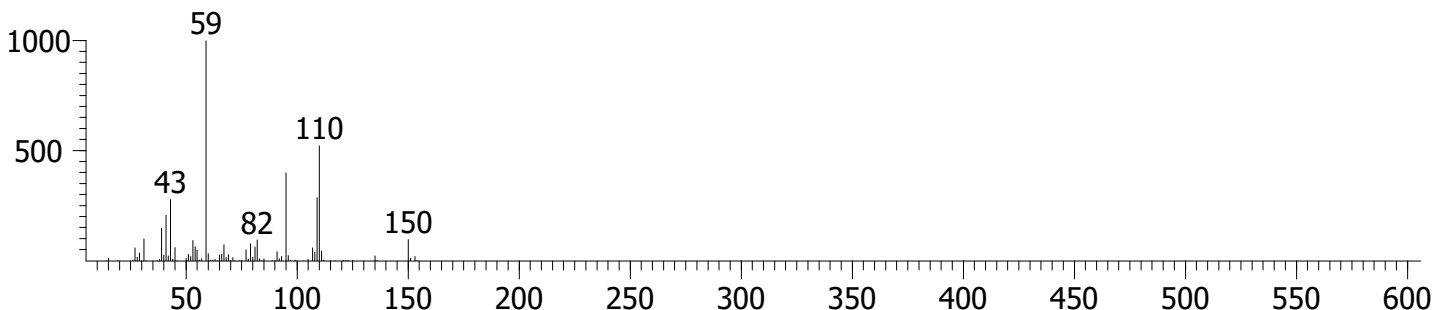

| Hit | Name                                                                             | Similarity | Probability | CAS        | Library | Formula  | Weight |
|-----|----------------------------------------------------------------------------------|------------|-------------|------------|---------|----------|--------|
| 1   | S-(+)-5-(1-Hydroxy-1-methylethyl)-2-methyl-2-cyclohexen-1-one                    | 889        | 7913        | 60593-11-5 | mainlib | C10H16O2 | 168    |
| 2   | 8-Hydroxycarvotanacetone                                                         | 846        | 1745        | 7712-46-1  | mainlib | C10H16O2 | 168    |
| 3   | 1,2-cis-1,5-trans-2,5-dihydroxy-4-methyl-1-(1-hydroxy-1-isopropyl)cyclohex-3-ene | 752        | 142         | 87096-70-6 | mainlib | C10H18O3 | 186    |
| 4   | 3-(2-Hydroxy-2-methyl-propyl)-cyclohex-2-enone                                   | 732        | 65          | 0-00-0     | mainlib | C10H16O2 | 168    |
| 5   | 7-Oxabicyclo[4.1.0]heptane, 2-methylene-                                         | 714        | 33          | 98126-49-9 | mainlib | C7H10O   | 110    |

## Dimethyl phthalate

1st Dimension R.T. = 1200.59  
2nd Dimension R.T. = 2.198  
Quant Mass(es) = 163  
S/N = 1672.0  
Area = 318048  
Height = 29040  
Similarity = 884

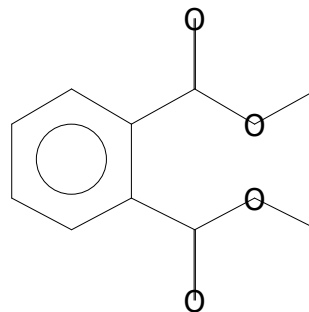

Peak Apex - sample "INF-C comp 091919 (111419):1", peak 2450, at 1200.59 , 2.198 sec , sec (Spec # 109513)

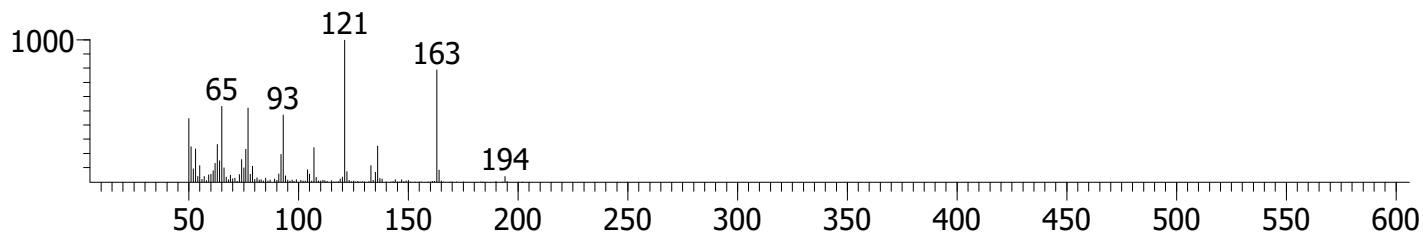

Peak True - sample "INF-C comp 091919 (111419):1", peak 2450, at 1200.59 , 2.198 sec , sec (Spec # 109513)

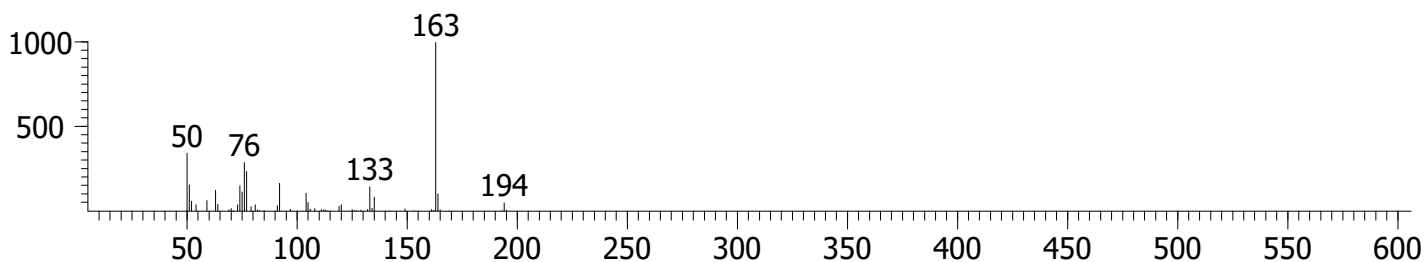

Library Hit - similarity 884, "Dimethyl phthalate"

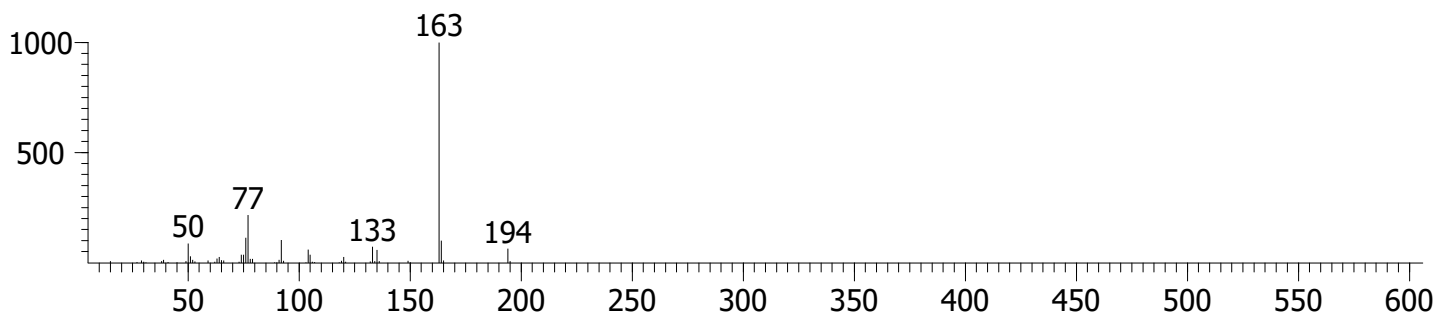

| Hit | Name                                               | Similarity | Probability | CAS        | Library | Formula     | Weight |
|-----|----------------------------------------------------|------------|-------------|------------|---------|-------------|--------|
| 1   | Dimethyl phthalate                                 | 884        | 4981        | 131-11-3   | mainlib | C10H10O4    | 194    |
| 2   | Benzoic acid, 2-(1-oxopropyl)-, methyl ester       | 820        | 818         | 32025-37-9 | mainlib | C11H12O3    | 192    |
| 3   | Phthalic acid, 3,5-difluorophenyl methyl ester     | 808        | 545         | 0-00-0     | mainlib | C15H10F2O4  | 292    |
| 4   | Phthalic acid, 3-chlorophenyl methyl ester         | 807        | 523         | 0-00-0     | mainlib | C15H11ClO4  | 290    |
| 5   | Phthalic acid, 2-bromo-4-fluorophenyl methyl ester | 804        | 462         | 0-00-0     | mainlib | C15H10BrFO4 | 352    |

3-Penten-2-one,  
4-(2,6,6-trimethyl-2-cyclohexen-1-yl)-

1st Dimension R.T. = 1232.07  
 2nd Dimension R.T. = 1.584  
 Quant Mass(es) = 135  
 S/N = 4501.9  
 Area = 1196299  
 Height = 139026  
 Similarity = 865

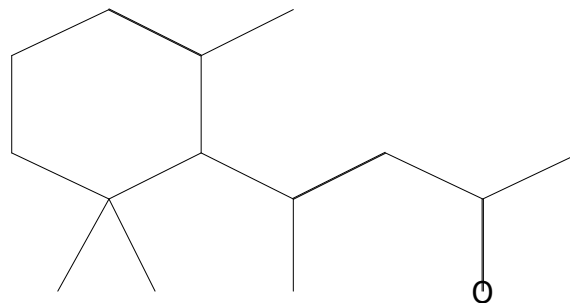

Peak Apex - sample "INF-C comp 091919 (111419):1", peak 2592, at 1232.07 , 1.584 sec , sec (Spec # 114190)

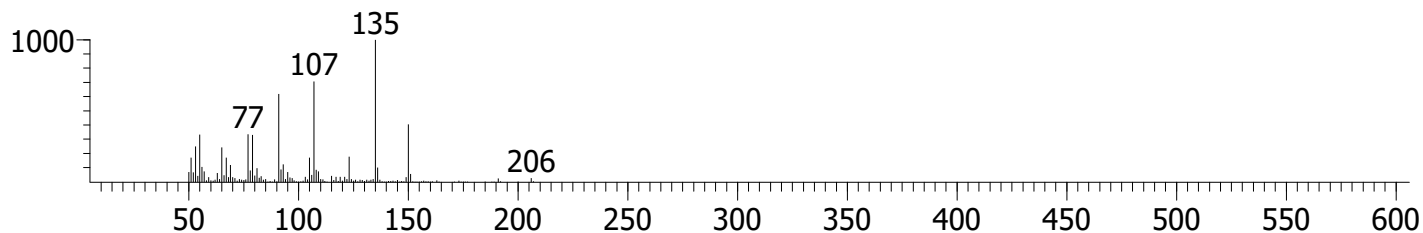

Peak True - sample "INF-C comp 091919 (111419):1", peak 2592, at 1232.07 , 1.584 sec , sec (Spec # 114190)

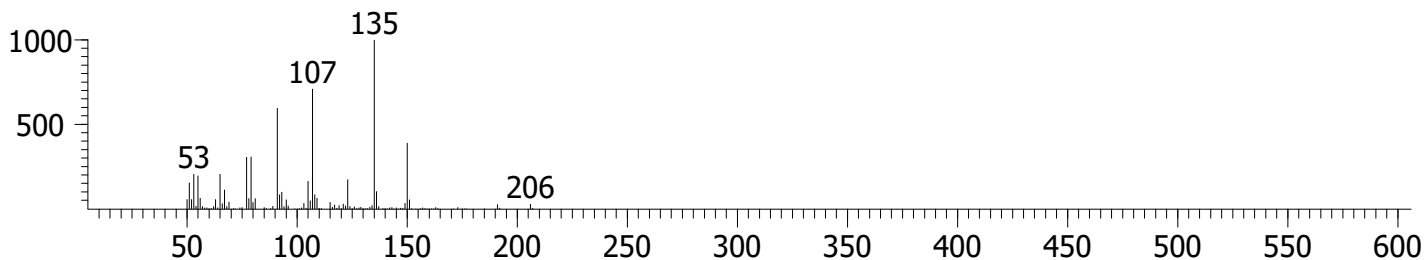

Library Hit - similarity 865, "3-Penten-2-one, 4-(2,6,6-trimethyl-2-cyclohexen-1-yl)-"

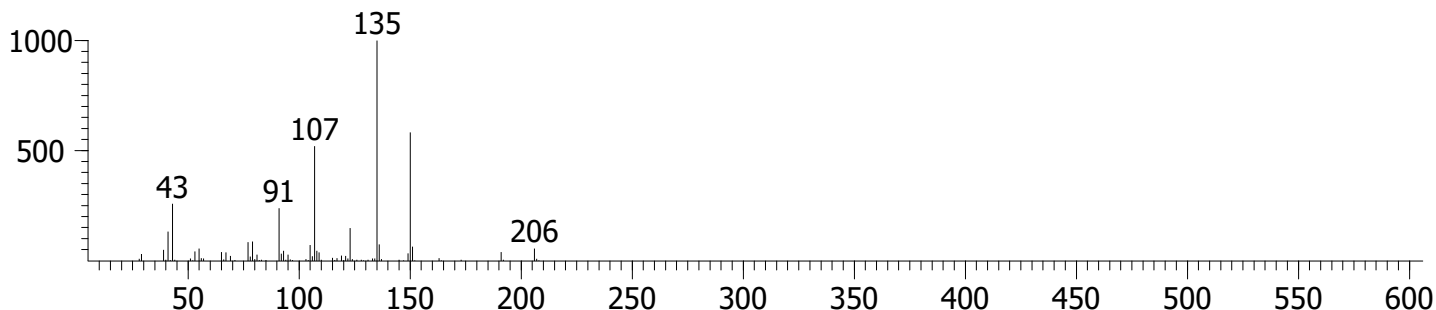

| Hit | Name                                                   | Similarity | Probability | CAS         | Library | Formula | Weight |
|-----|--------------------------------------------------------|------------|-------------|-------------|---------|---------|--------|
| 1   | 3-Penten-2-one, 4-(2,6,6-trimethyl-2-cyclohexen-1-yl)- | 865        | 2926        | 114933-28-7 | mainlib | C14H22O | 206    |
| 2   | Ethanone, 1-(6,6-dimethylbicyclo[3.1.0]hex-2-en-2-yl)- | 862        | 2586        | 24555-40-6  | mainlib | C10H14O | 150    |
| 3   | à Isomethyl ionone                                     | 843        | 1255        | 127-51-5    | mainlib | C14H22O | 206    |
| 4   | Phenol, 2-ethyl-4,5-dimethyl-                          | 816        | 369         | 2219-78-5   | mainlib | C10H14O | 150    |
| 5   | 3,5-Heptadienal, 2-ethylidene-6-methyl-                | 812        | 312         | 99172-18-6  | mainlib | C10H14O | 150    |

3-Buten-2-one,  
4-(2,6,6-trimethyl-1-cyclohexen-1-yl)-

1st Dimension R.T. = 1239.07  
 2nd Dimension R.T. = 1.670  
 Quant Mass(es) = 177  
 S/N = 1806.3  
 Area = 238522  
 Height = 27388  
 Similarity = 846

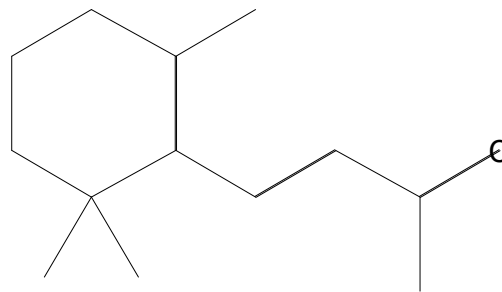

Peak Apex - sample "INF-C comp 091919 (111419):1", peak 2641, at 1239.07 , 1.670 sec , sec (Spec # 1152 63)

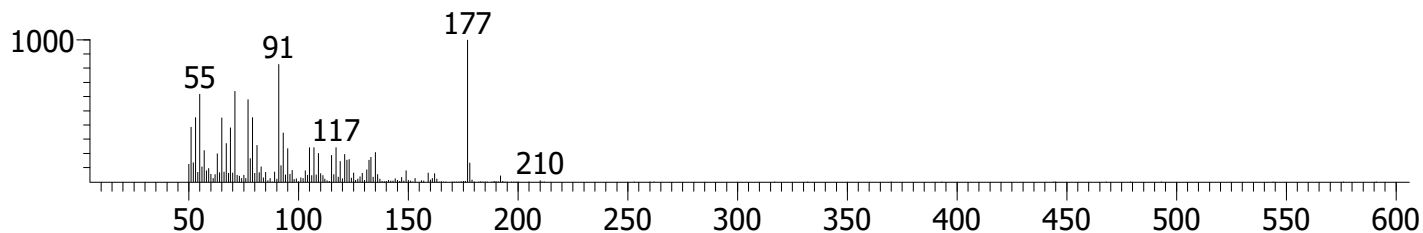

Peak True - sample "INF-C comp 091919 (111419):1", peak 2641, at 1239.07 , 1.670 sec , sec (Spec # 11526 3)

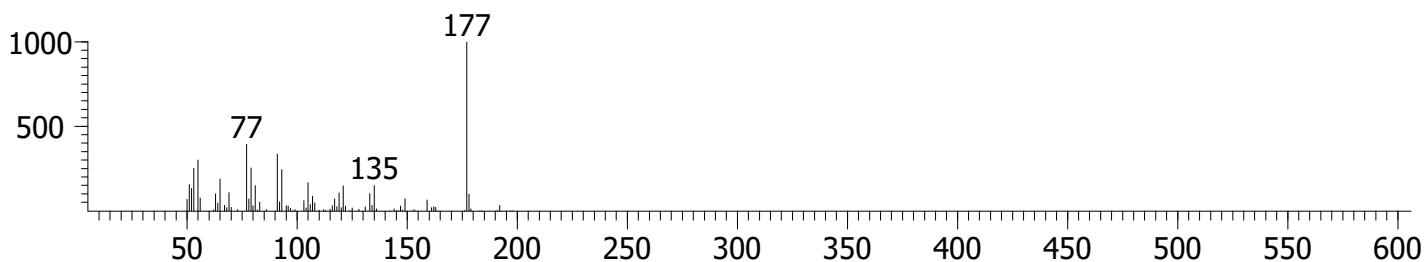

Library Hit - similarity 846, "3-Buten-2-one, 4-(2,6,6-trimethyl-1-cyclohexen-1-yl)-"

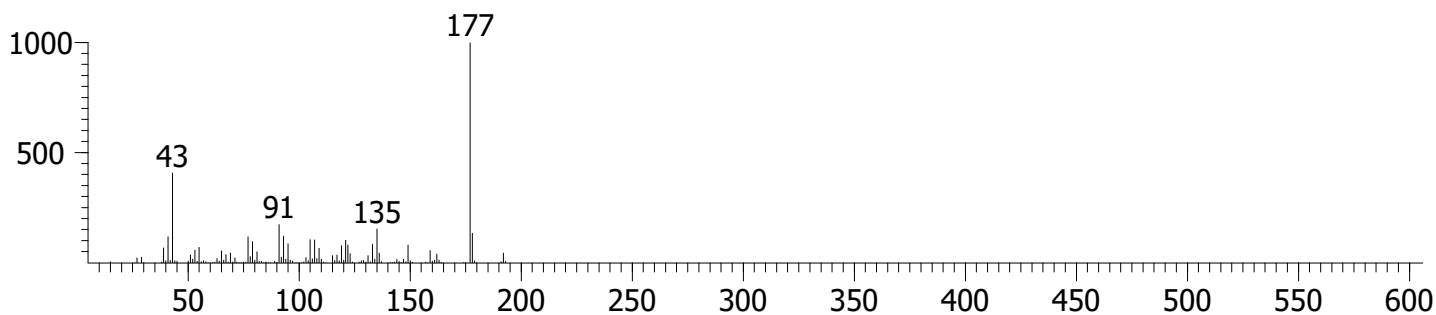

| Hit | Name                                                               | Similarity | Probability | CAS        | Library | Formula | Weight |
|-----|--------------------------------------------------------------------|------------|-------------|------------|---------|---------|--------|
| 1   | 3-Buten-2-one, 4-(2,6,6-trimethyl-1-cyclohexen-1-yl)-              | 846        | 3251        | 14901-07-6 | mainlib | C13H20O | 192    |
| 2   | trans-á-Ionone                                                     | 845        | 3125        | 79-77-6    | mainlib | C13H20O | 192    |
| 3   | 2H-1-Benzopyran, 3,5,6,8a-tetrahydro-2,5,5,8a-tetramethyl-, trans- | 834        | 2143        | 41678-29-9 | mainlib | C13H20O | 192    |
| 4   | á-Oplopenone                                                       | 766        | 325         | 28305-60-4 | mainlib | C15H24O | 220    |
| 5   | Edulan II                                                          | 764        | 299         | 41678-30-2 | mainlib | C13H20O | 192    |

## 6,7-Dodecanedione

1st Dimension R.T. = 1305.53

2nd Dimension R.T. = 2.455

Quant Mass(es) = 99

S/N = 181.74

Area = 89275

Height = 8040.5

Similarity = 831

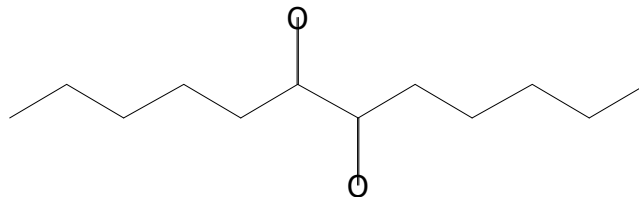

Peak Apex - sample "INF-C comp 091919 (111419):1", peak 3007, at 1305.53 , 2.455 sec , sec (Spec # 1254 52)

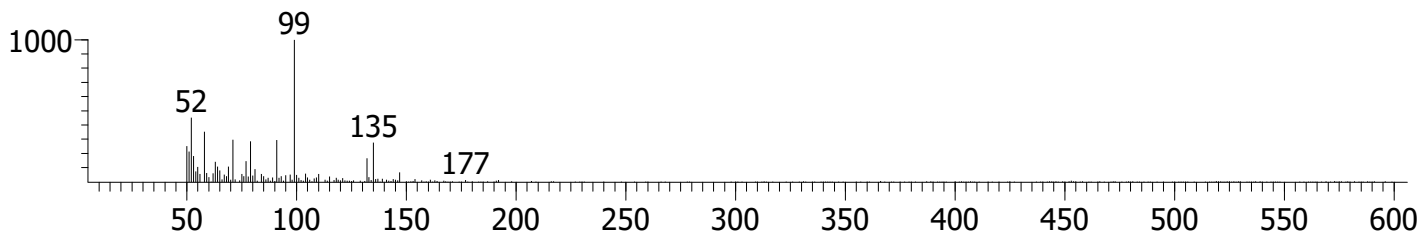

Peak True - sample "INF-C comp 091919 (111419):1", peak 3007, at 1305.53 , 2.455 sec , sec (Spec # 12545 2)

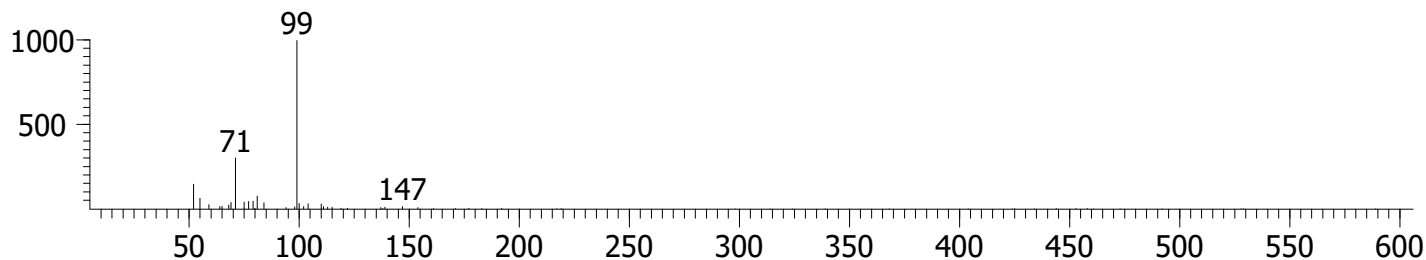

Library Hit - similarity 831, "6,7-Dodecanedione"

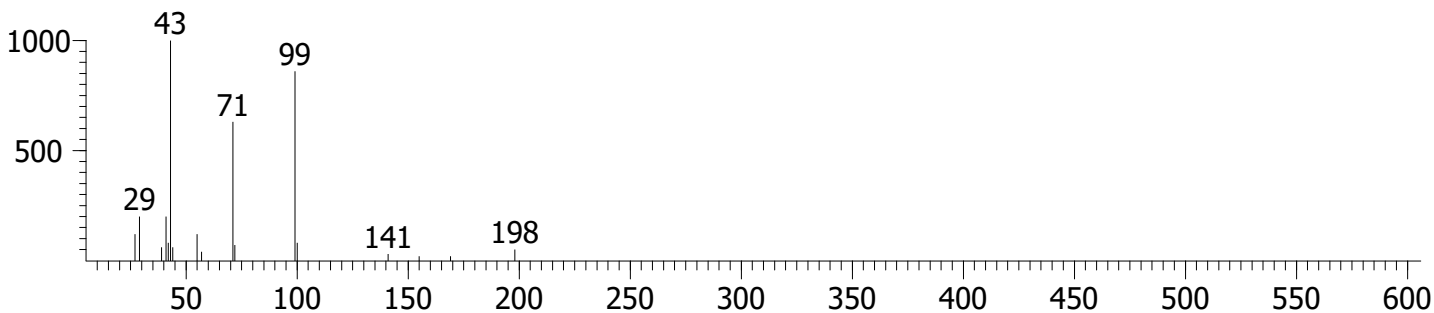

| Hit | Name                                    | Similarity | Probability | CAS         | Library | Formula   | Weight |
|-----|-----------------------------------------|------------|-------------|-------------|---------|-----------|--------|
| 1   | 6,7-Dodecanedione                       | 831        | 3946        | 13757-90-9  | mainlib | C12H22O2  | 198    |
| 2   | 4-Methyl-6-hepten-4-olide               | 817        | 2470        | 0-00-0      | mainlib | C8H12O2   | 140    |
| 3   | 4H-Imidazol-4-one, 2-amino-1,5-dihydro- | 796        | 1050        | 503-86-6    | mainlib | C3H5N3O   | 99     |
| 4   | n-Hexyl methylphosphonofluoridate       | 791        | 847         | 113548-89-3 | mainlib | C7H16FO2P | 182    |
| 5   | Furan, 2,5-dihydro-2,5-dimethoxy-       | 788        | 748         | 332-77-4    | mainlib | C6H10O3   | 130    |



# Aspirin

1st Dimension R.T. = 1459.44  
2nd Dimension R.T. = 1.670  
Quant Mass(es) = 120  
S/N = 5360.9  
Area = 986298  
Height = 105043  
Similarity = 868

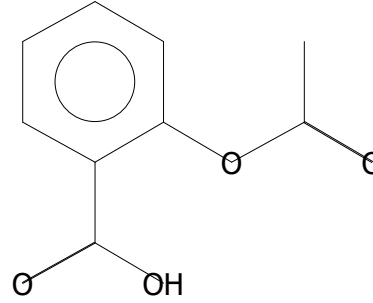

Peak Apex - sample "INF-C comp 091919 (111419):1", peak 3894, at 1459.44 , 1.670 sec , sec (Spec # 148653)

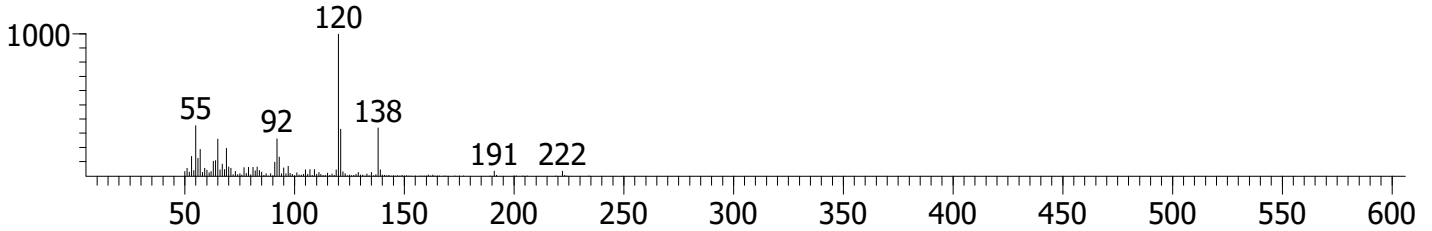

Peak True - sample "INF-C comp 091919 (111419):1", peak 3894, at 1459.44 , 1.670 sec , sec (Spec # 148653)

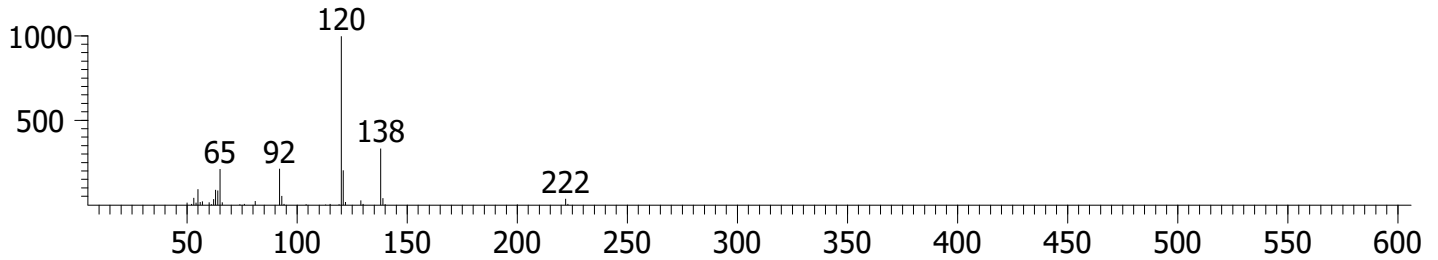

Library Hit - similarity 868, "Aspirin"

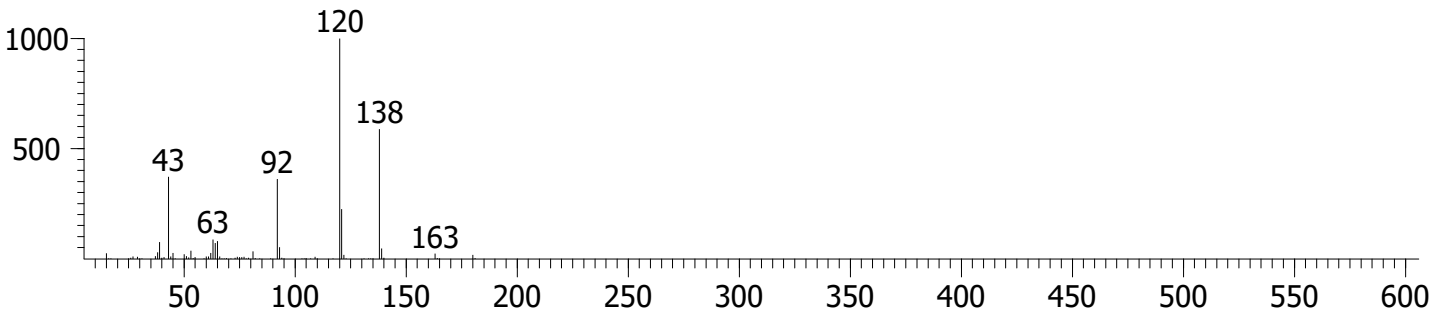

| Hit | Name                                          | Similarity | Probability | CAS        | Library | Formula  | Weight |
|-----|-----------------------------------------------|------------|-------------|------------|---------|----------|--------|
| 1   | Aspirin                                       | 868        | 1267        | 50-78-2    | mainlib | C9H8O4   | 180    |
| 2   | Salicylic acid, 1-methylpropyl ester          | 868        | 1267        | 0-00-0     | mainlib | C11H14O3 | 194    |
| 3   | Salicylic acid, tert-butyl ester              | 865        | 1120        | 0-00-0     | mainlib | C11H14O3 | 194    |
| 4   | Benzoic acid, 2-hydroxy-, 2-methylbutyl ester | 862        | 989         | 51115-63-0 | mainlib | C12H16O3 | 208    |
| 5   | n-Hexyl salicylate                            | 860        | 912         | 6259-76-3  | mainlib | C13H18O3 | 222    |

## 2-Octyl benzoate

1st Dimension R.T. = 1490.92

2nd Dimension R.T. = 1.650

Quant Mass(es) = 105

S/N = 1271.2

Area = 560290

Height = 54071

Similarity = 870

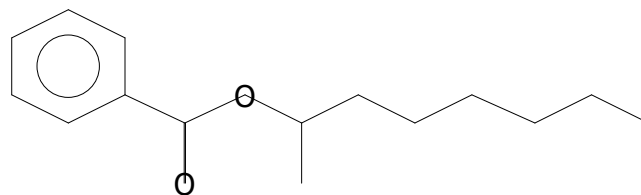

Peak Apex - sample "INF-C comp 091919 (111419):1", peak 4082, at 1490.92 , 1.650 sec , sec (Spec # 153420)

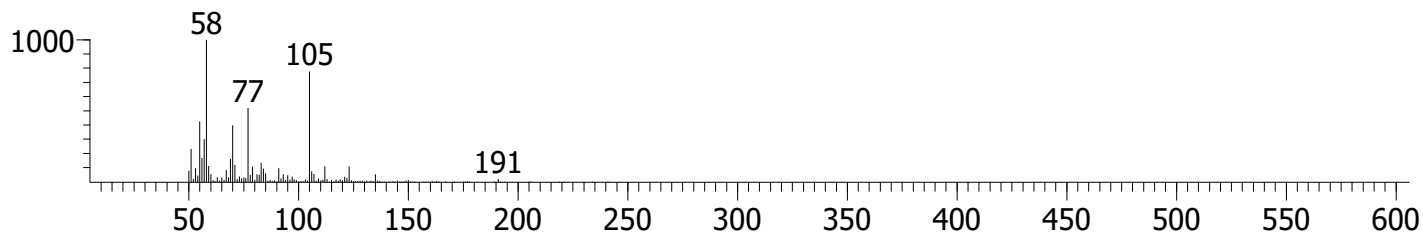

Peak True - sample "INF-C comp 091919 (111419):1", peak 4082, at 1490.92 , 1.650 sec , sec (Spec # 153420)

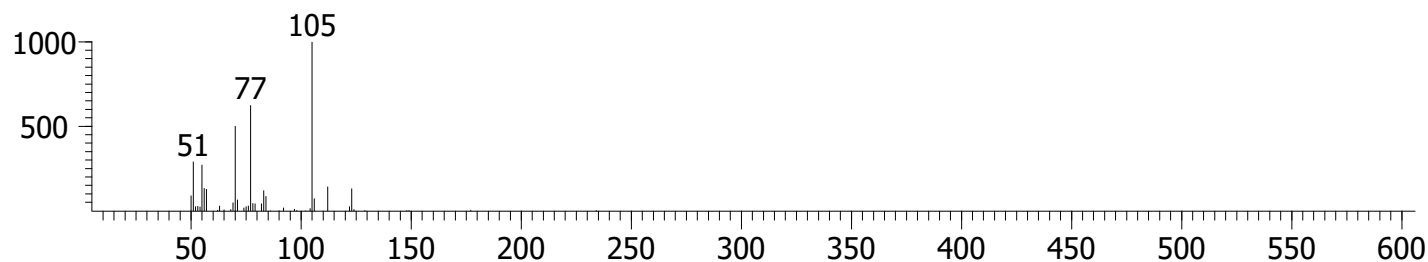

Library Hit - similarity 870, "2-Octyl benzoate"

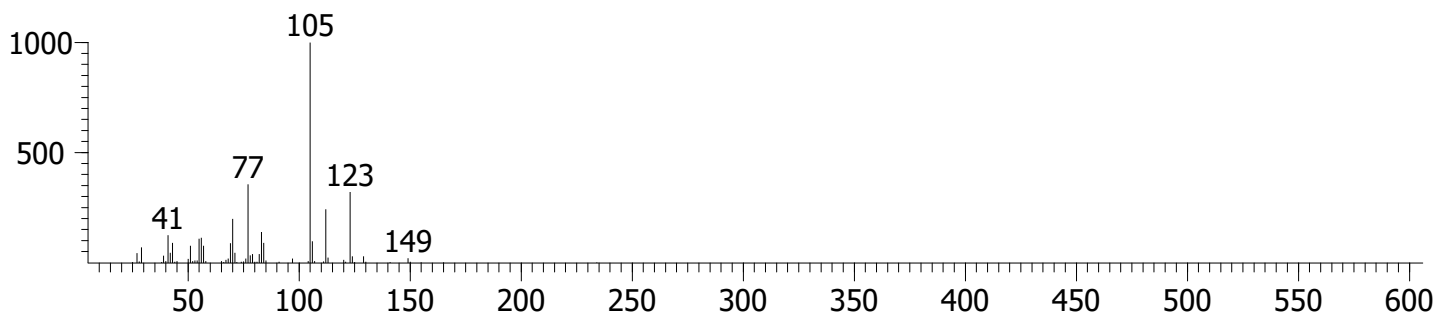

| Hit | Name                                        | Similarity | Probability | CAS        | Library | Formula                                          | Weight |
|-----|---------------------------------------------|------------|-------------|------------|---------|--------------------------------------------------|--------|
| 1   | 2-Octyl benzoate                            | 870        | 4364        | 6938-51-8  | mainlib | C <sub>15</sub> H <sub>22</sub> O <sub>2</sub>   | 234    |
| 2   | Benzoic acid, 2-ethylhexyl ester            | 868        | 4026        | 5444-75-7  | mainlib | C <sub>15</sub> H <sub>22</sub> O <sub>2</sub>   | 234    |
| 3   | Benzoic acid, 2-methylbutyl ester           | 794        | 535         | 0-00-0     | mainlib | C <sub>12</sub> H <sub>16</sub> O <sub>2</sub>   | 192    |
| 4   | Benzoic acid, 3-methylbutyl-2 ester         | 770        | 179         | 41757-90-8 | mainlib | C <sub>12</sub> H <sub>16</sub> O <sub>2</sub>   | 192    |
| 5   | 3-tert-Butyl-5-chloro-2-hydroxybenzophenone | 763        | 137         | 52196-47-1 | mainlib | C <sub>17</sub> H <sub>17</sub> ClO <sub>2</sub> | 288    |

## Benzene, (1-propylheptyl)-

1st Dimension R.T. = 1522.4  
2nd Dimension R.T. = 1.432  
Quant Mass(es) = 91  
S/N = 3399.7  
Area = 1920247  
Height = 263973  
Similarity = 881

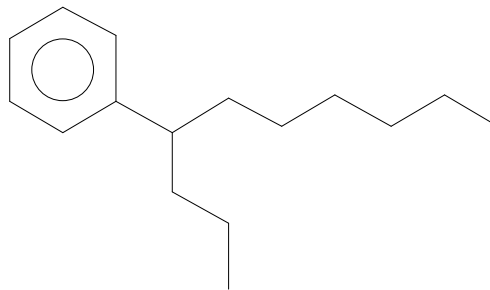

Peak Apex - sample "INF-C comp 091919 (111419):1", peak 4277, at 1522.4 , 1.432 sec , sec (Spec # 158157)

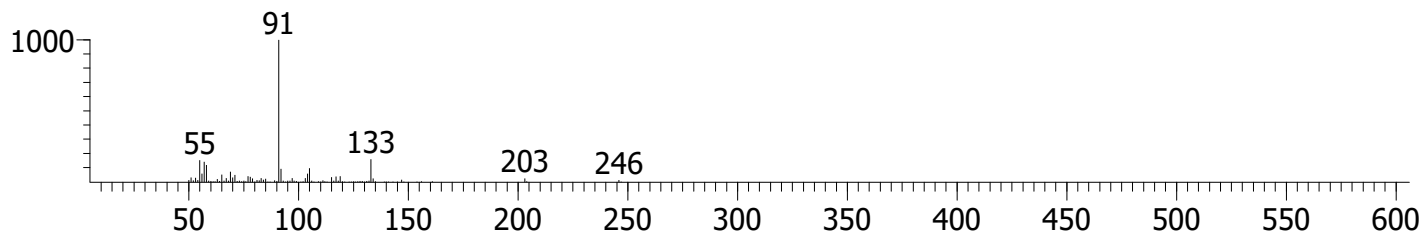

Peak True - sample "INF-C comp 091919 (111419):1", peak 4277, at 1522.4 , 1.432 sec , sec (Spec # 158157)

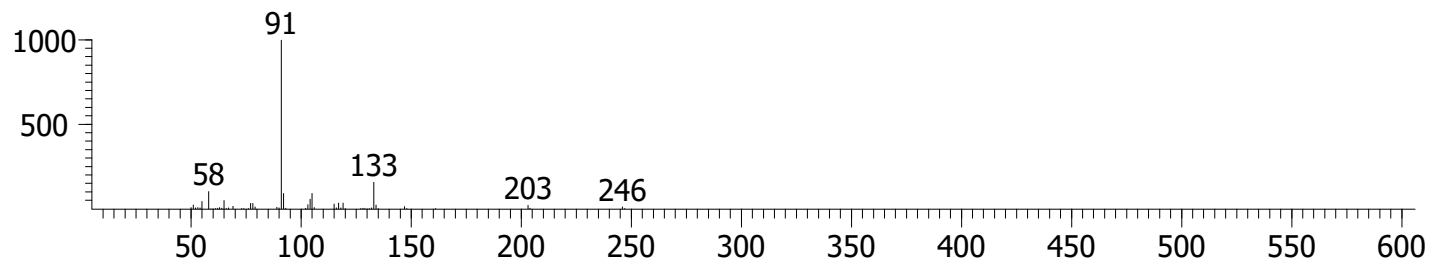

Library Hit - similarity 881, "Benzene, (1-propylheptyl)-"

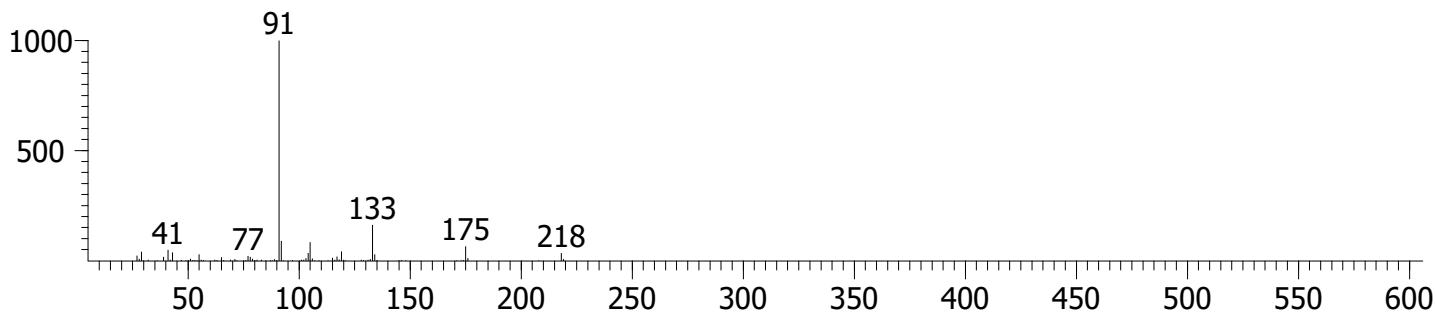

| Hit | Name                             | Similarity | Probability | CAS        | Library | Formula    | Weight |
|-----|----------------------------------|------------|-------------|------------|---------|------------|--------|
| 1   | Benzene, (1-propylheptyl)-       | 881        | 5072        | 4537-12-6  | mainlib | C16H26     | 218    |
| 2   | Benzene, (1-propyldecyl)-        | 860        | 2157        | 4534-51-4  | mainlib | C19H32     | 260    |
| 3   | Benzene, (1-propyloctyl)-        | 803        | 404         | 4536-86-1  | mainlib | C17H28     | 232    |
| 4   | S,S'-Methylenebis[benzylsulfone] | 802        | 388         | 6331-52-8  | mainlib | C15H16O4S2 | 324    |
| 5   | Methoxyacetic acid, benzyl ester | 799        | 343         | 32786-24-6 | mainlib | C10H12O3   | 180    |

Ethanone,  
hexahydro-3,6,8,8-tetramethyl-1H-3a,7-meth

1st Dimension R.T. = 1571.38  
2nd Dimension R.T. = 1.742  
Quant Mass(es) = 161  
S/N = 445.21  
Area = 85755  
Height = 9451.6  
Similarity = 829

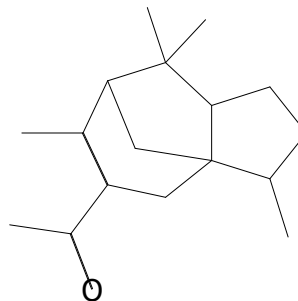

Peak Apex - sample "INF-C comp 091919 (111419):1", peak 4558, at 1571.38 , 1.742 sec , sec (Spec # 165624)

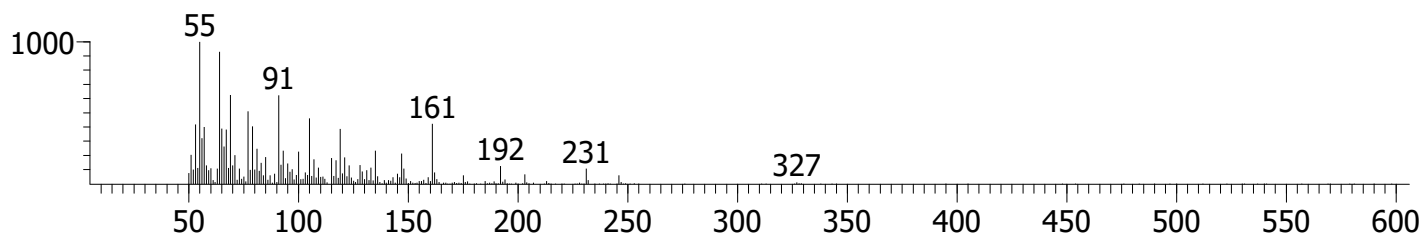

Peak True - sample "INF-C comp 091919 (111419):1", peak 4558, at 1571.38 , 1.742 sec , sec (Spec # 165624)

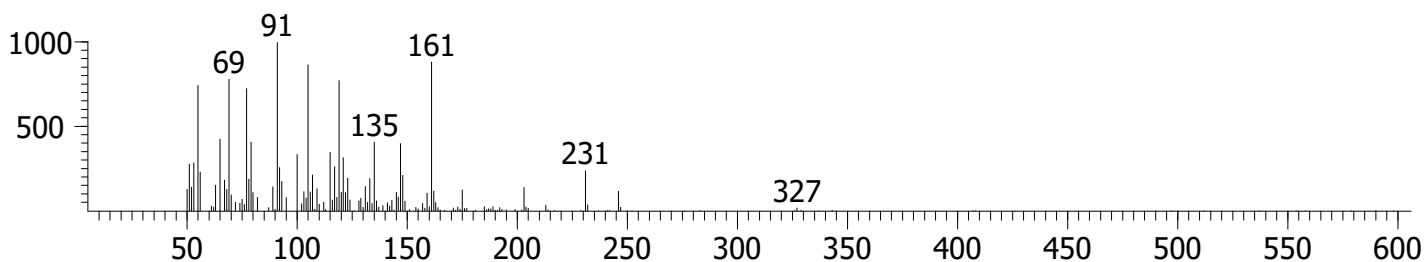

Library Hit - similarity 829, "Ethanone, 1-(2,3,4,7,8,8a-hexahydro-3,6,8,8-tetramethyl-1H-3a,7-methanoazulen-5-yl)-"

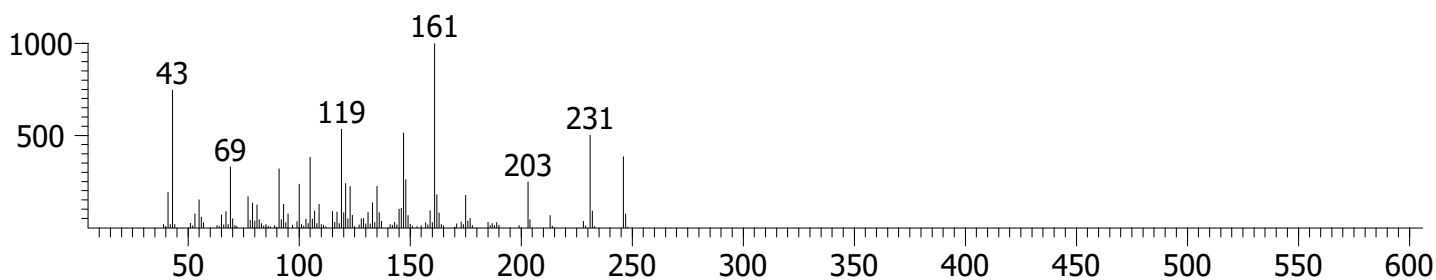

| Hit | Name                                                                                 | Similarity | Probability | CAS        | Library | Formula | Weight |
|-----|--------------------------------------------------------------------------------------|------------|-------------|------------|---------|---------|--------|
| 1   | Ethanone, 1-(2,3,4,7,8,8a-hexahydro-3,6,8,8-tetramethyl-1H-3a,7-methanoazulen-5-yl)- | 829        | 4253        | 68039-35-0 | mainlib | C17H26O | 246    |
| 2   | Tetracyclo[6.1.0.0(2,4).0(5,7)]nonane, 3,3,6,6,9,9-hexamethyl-, cis,cis,trans--      | 733        | 338         | 0-00-0     | mainlib | C15H24  | 204    |
| 3   | Megastigma-4,6(E),8(Z)-triene                                                        | 729        | 286         | 71186-24-8 | mainlib | C13H20  | 176    |
| 4   | Megastigma-4,6(Z),8(Z)-triene                                                        | 725        | 241         | 71186-25-9 | mainlib | C13H20  | 176    |
| 5   | Bicyclo[4.1.0]-3-heptene, 2-isopropenyl-5-isopropyl-7,7-dimethyl-                    | 723        | 223         | 0-00-0     | mainlib | C15H24  | 204    |

Salicylic acid, 2-methylbutyl ether,  
2-methylbutyl ester

1st Dimension R.T. = 1592.36  
2nd Dimension R.T. = 1.617  
Quant Mass(es) = 120  
S/N = 8713.7  
Area = 2739024  
Height = 339170  
Similarity = 823

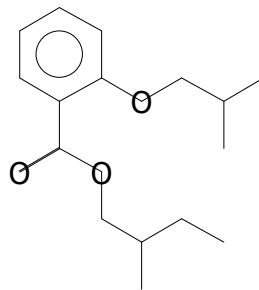

Peak Apex - sample "INF-C comp 091919 (111419):1", peak 4672, at 1592.36 , 1.617 sec , sec (Spec # 168785)

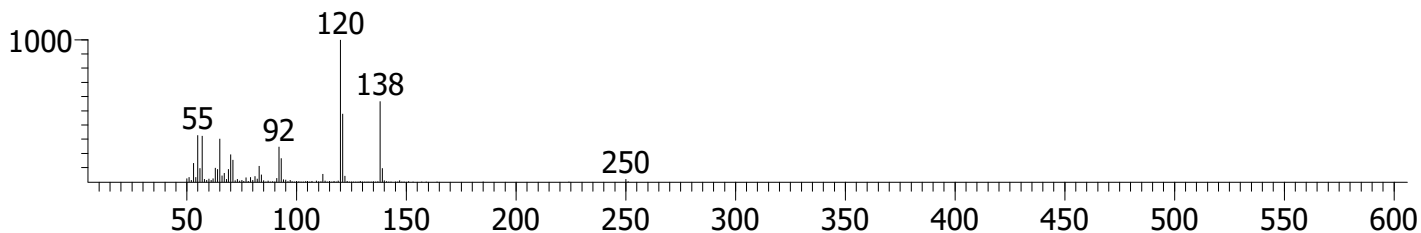

Peak True - sample "INF-C comp 091919 (111419):1", peak 4672, at 1592.36 , 1.617 sec , sec (Spec # 168785)

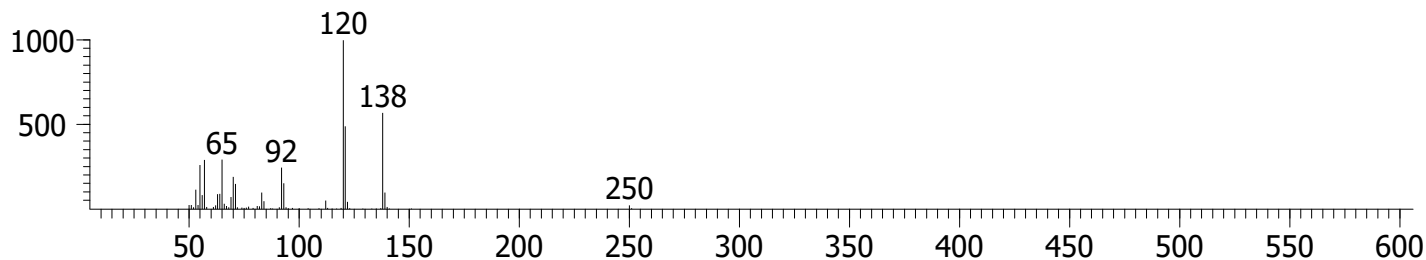

Library Hit - similarity 823, "Salicylic acid, 2-methylbutyl ether, 2-methylbutyl ester"

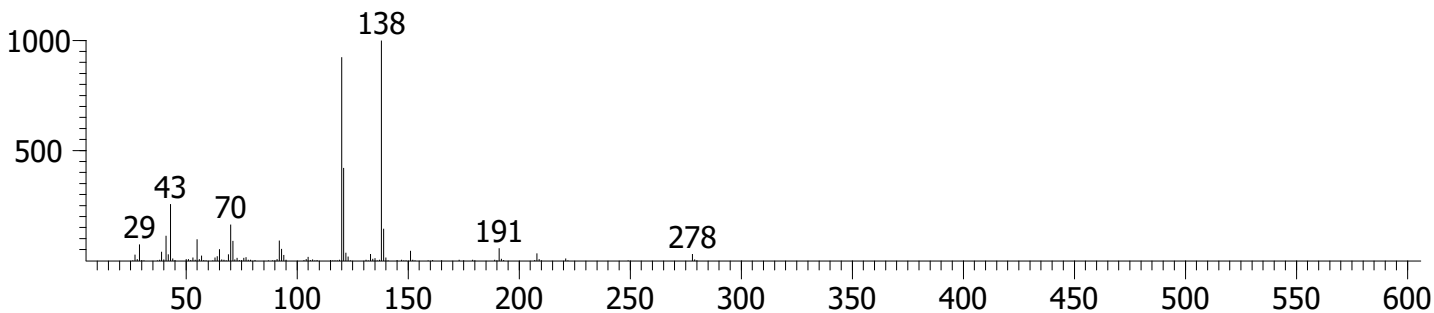

| Hit | Name                                                       | Similarity | Probability | CAS        | Library | Formula  | Weight |
|-----|------------------------------------------------------------|------------|-------------|------------|---------|----------|--------|
| 1   | Salicylic acid, 2-methylbutyl ether, 2-methylbutyl ester   | 823        | 1965        | 0-00-0     | mainlib | C17H26O3 | 278    |
| 2   | Benzoic acid, 2-hydroxy-, 2-methylbutyl ester              | 820        | 1736        | 51115-63-0 | mainlib | C12H16O3 | 208    |
| 3   | Salicylic acid, tert.-butyl ester                          | 811        | 1260        | 0-00-0     | mainlib | C11H14O3 | 194    |
| 4   | Benzoic acid, 2-hydroxy-, heptyl ester                     | 811        | 1260        | 6259-77-4  | mainlib | C14H20O3 | 236    |
| 5   | Salicylic acid, 1-methylpropyl ether, 1-methylpropyl ester | 797        | 789         | 0-00-0     | mainlib | C15H22O3 | 250    |

2-Propenoic acid, 3-(4-methoxyphenyl)-,  
2-ethylhexyl ester

1st Dimension R.T. = 1931.67  
 2nd Dimension R.T. = 1.934  
 Quant Mass(es) = 178  
 S/N = 4643.8  
 Area = 763329  
 Height = 62066  
 Similarity = 878

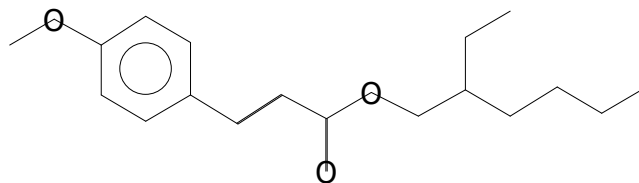

Peak Apex - sample "INF-C comp 091919 (111419):1", peak 6236, at 1931.67 , 1.934 sec , sec (Spec # 2202 43)

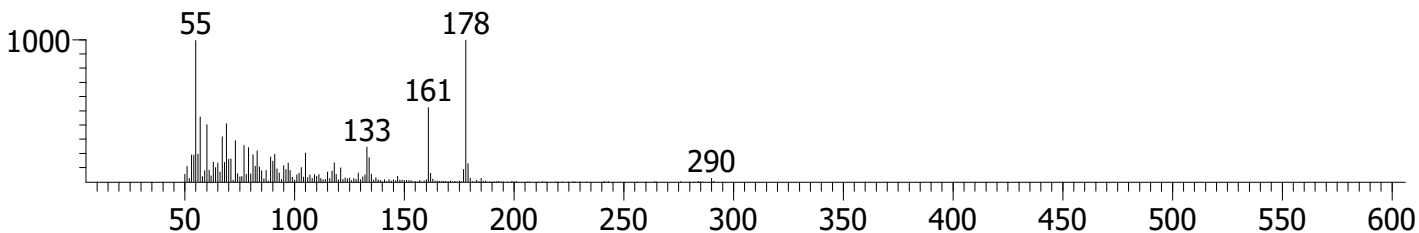

Peak True - sample "INF-C comp 091919 (111419):1", peak 6236, at 1931.67 , 1.934 sec , sec (Spec # 22024 3)

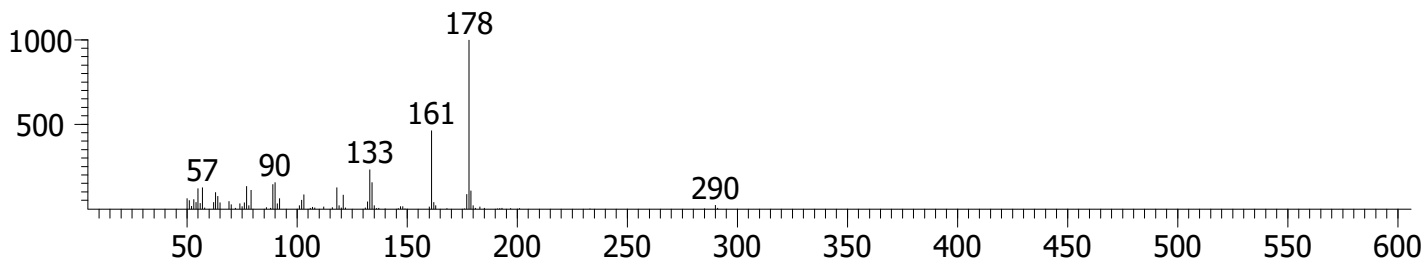

Library Hit - similarity 878, "2-Propenoic acid, 3-(4-methoxyphenyl)-, 2-ethylhexyl ester"

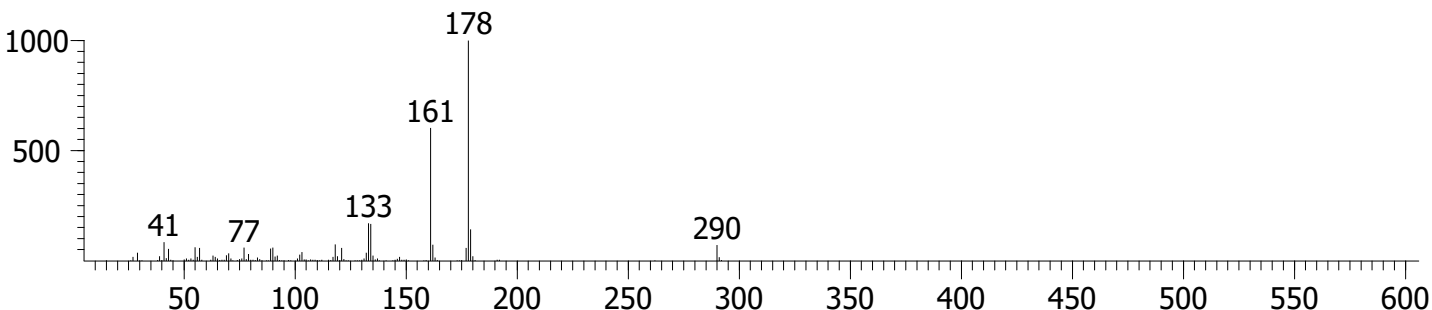

| Hit | Name                                                       | Similarity | Probability | CAS        | Library | Formula  | Weight |
|-----|------------------------------------------------------------|------------|-------------|------------|---------|----------|--------|
| 1   | 2-Propenoic acid, 3-(4-methoxyphenyl)-, 2-ethylhexyl ester | 878        | 6918        | 5466-77-3  | mainlib | C18H26O3 | 290    |
| 2   | 2-Propenoic acid, 3-(4-methoxyphenyl)-, (E)-               | 810        | 1049        | 943-89-5   | mainlib | C10H10O3 | 178    |
| 3   | 2-Ethylhexyl trans-4-methoxycinnamate                      | 798        | 699         | 83834-59-7 | mainlib | C18H26O3 | 290    |
| 4   | 2-Propenoic acid, 3-(4-methoxyphenyl)-                     | 792        | 549         | 830-09-1   | mainlib | C10H10O3 | 178    |
| 5   | Cinoxate                                                   | 787        | 442         | 104-28-9   | mainlib | C14H18O4 | 250    |

(S,E)-2,5-Dimethyl-4-vinylhexa-2,5-dien-1-yl  
acetate

1st Dimension R.T. = 812.31  
2nd Dimension R.T. = 1.518  
Quant Mass(es) = 119  
S/N = 567.54  
Area = 145639  
Height = 18635  
Similarity = 748

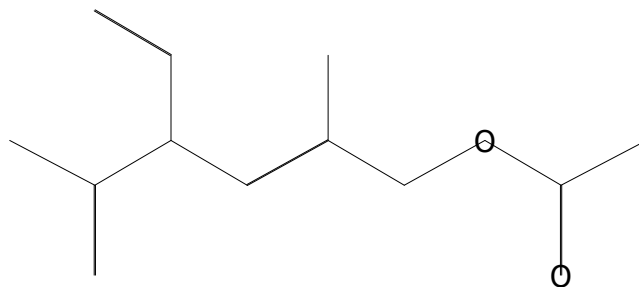

Peak Apex - sample "INF-A comp 092319 (111419):1", peak 738, at 812.31 , 1.518 sec , sec (Spec # 50580)

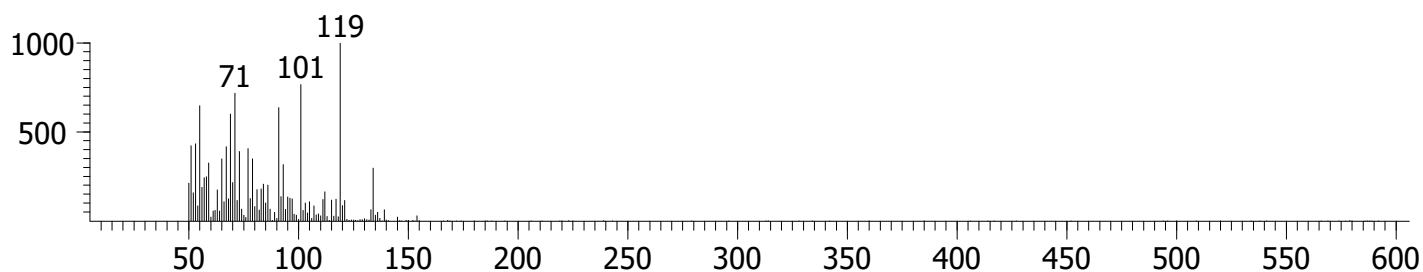

Peak True - sample "INF-A comp 092319 (111419):1", peak 738, at 812.31 , 1.518 sec , sec (Spec # 50580)

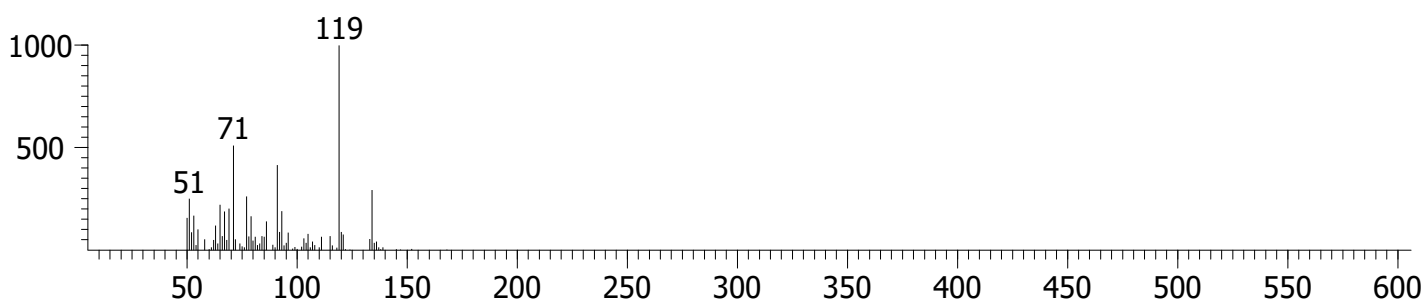

Library Hit - similarity 748, "(S,E)-2,5-Dimethyl-4-vinylhexa-2,5-dien-1-yl acetate"

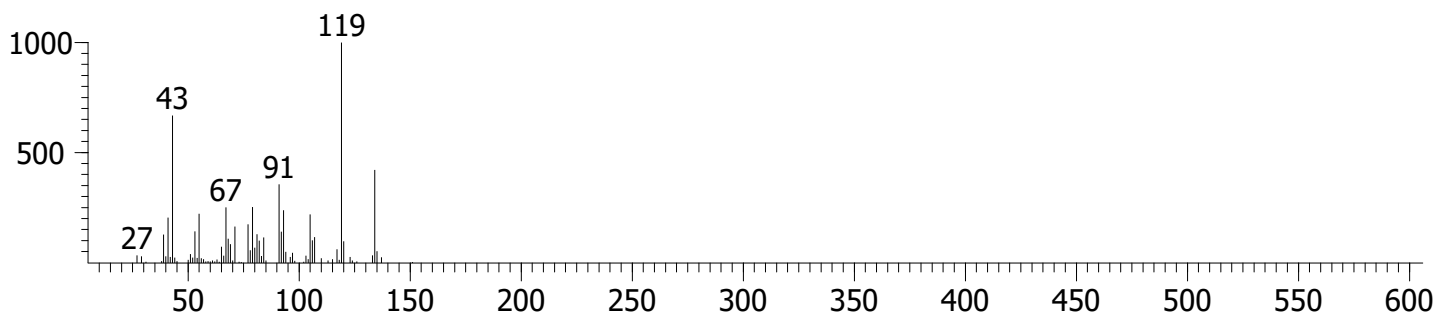

| Hit | Name                                                 | Similarity | Probability | CAS        | Library | Formula                                        | Weight |
|-----|------------------------------------------------------|------------|-------------|------------|---------|------------------------------------------------|--------|
| 1   | (S,E)-2,5-Dimethyl-4-vinylhexa-2,5-dien-1-yl acetate | 748        | 1247        | 20384-05-8 | mainlib | C <sub>12</sub> H <sub>18</sub> O <sub>2</sub> | 194    |
| 2   | (+)-cis-Verbenol, 2-methylpropionate                 | 748        | 1247        | 0-00-0     | mainlib | C <sub>14</sub> H <sub>22</sub> O <sub>2</sub> | 222    |
| 3   | 1,3,8-p-Menthatriene                                 | 734        | 781         | 18368-95-1 | mainlib | C <sub>10</sub> H <sub>14</sub>                | 134    |
| 4   | 2,6-Dimethyl-1,3,5,7-octatetraene, E,E-              | 723        | 535         | 460-01-5   | mainlib | C <sub>10</sub> H <sub>14</sub>                | 134    |
| 5   | 6,8-Nonadien-2-one, 6-methyl-5-(1-methylethylidene)- | 715        | 399         | 60714-16-1 | mainlib | C <sub>13</sub> H <sub>20</sub> O              | 192    |

## Tridecanoic acid

1st Dimension R.T. = 1441.95

2nd Dimension R.T. = 1.459

Quant Mass(es) = 60

S/N = 3258.2

Area = 1589965

Height = 199564

Similarity = 874

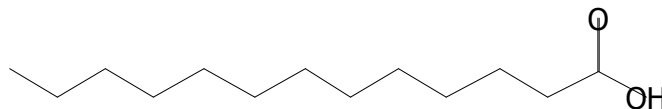

Peak Apex - sample "INF-A comp 092319 (111419):1", peak 3327, at 1441.95 , 1.459 sec , sec (Spec # 145971)

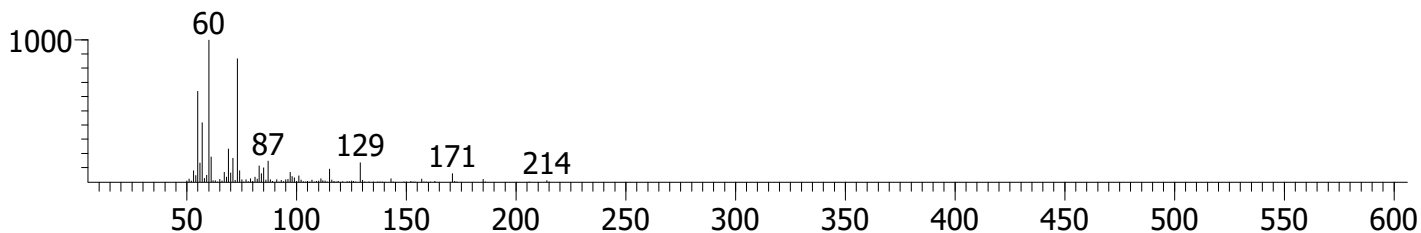

Peak True - sample "INF-A comp 092319 (111419):1", peak 3327, at 1441.95 , 1.459 sec , sec (Spec # 145971)

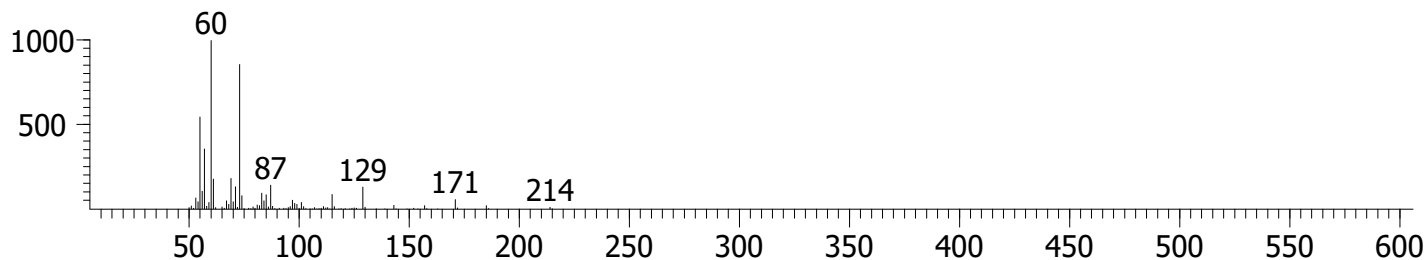

Library Hit - similarity 874, "Tridecanoic acid"

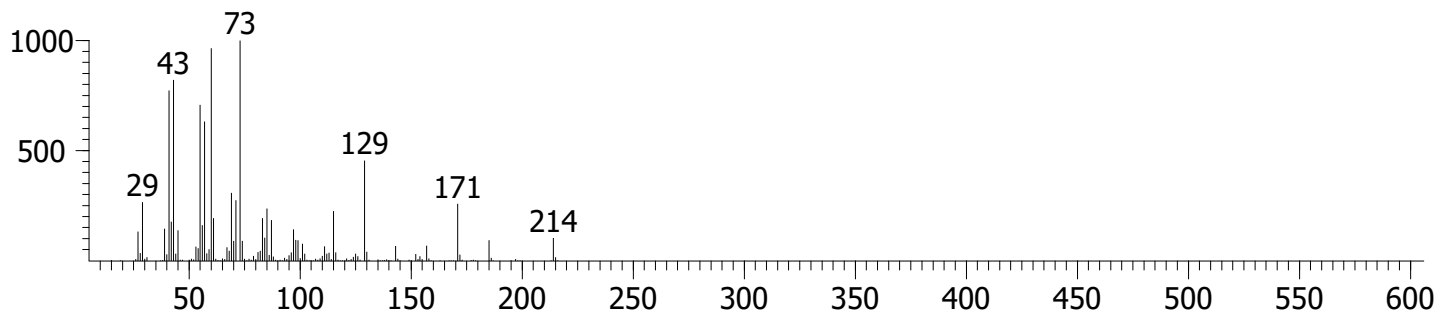

| Hit | Name                | Similarity | Probability | CAS      | Library | Formula  | Weight |
|-----|---------------------|------------|-------------|----------|---------|----------|--------|
| 1   | Tridecanoic acid    | 874        | 5380        | 638-53-9 | mainlib | C13H26O2 | 214    |
| 2   | n-Hexadecanoic acid | 833        | 1227        | 57-10-3  | mainlib | C16H32O2 | 256    |
| 3   | Nonanoic acid       | 818        | 744         | 112-05-0 | mainlib | C9H18O2  | 158    |
| 4   | Dodecanoic acid     | 815        | 657         | 143-07-7 | mainlib | C12H24O2 | 200    |
| 5   | Tetradecanoic acid  | 813        | 606         | 544-63-8 | mainlib | C14H28O2 | 228    |



## 1H-Indole-2,3-dione

1st Dimension R.T. = 1525.9  
2nd Dimension R.T. = 2.812  
Quant Mass(es) = 92  
S/N = 7820.0  
Area = 4923786  
Height = 309377  
Similarity = 890

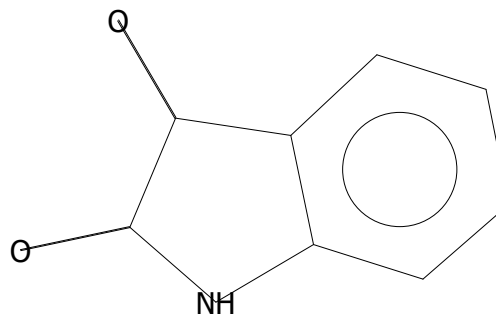

Peak Apex - sample "INF-A comp 092319 (111419):1", peak 3742, at 1525.9 , 2.812 sec , sec (Spec # 158896)

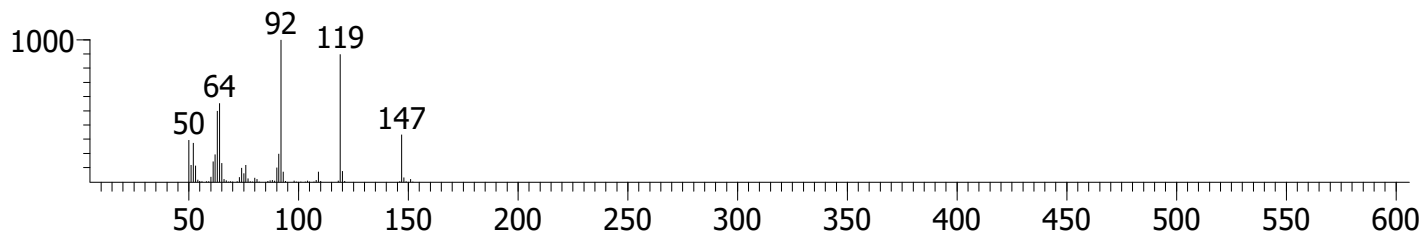

Peak True - sample "INF-A comp 092319 (111419):1", peak 3742, at 1525.9 , 2.812 sec , sec (Spec # 158896)

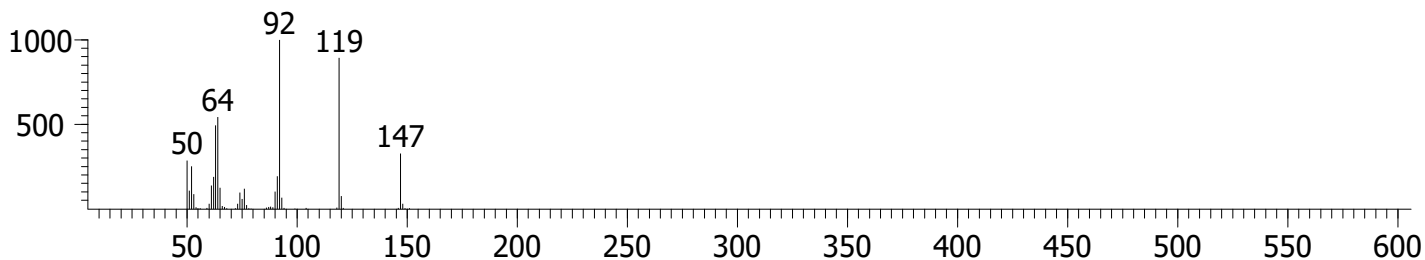

Library Hit - similarity 890, "1H-Indole-2,3-dione"

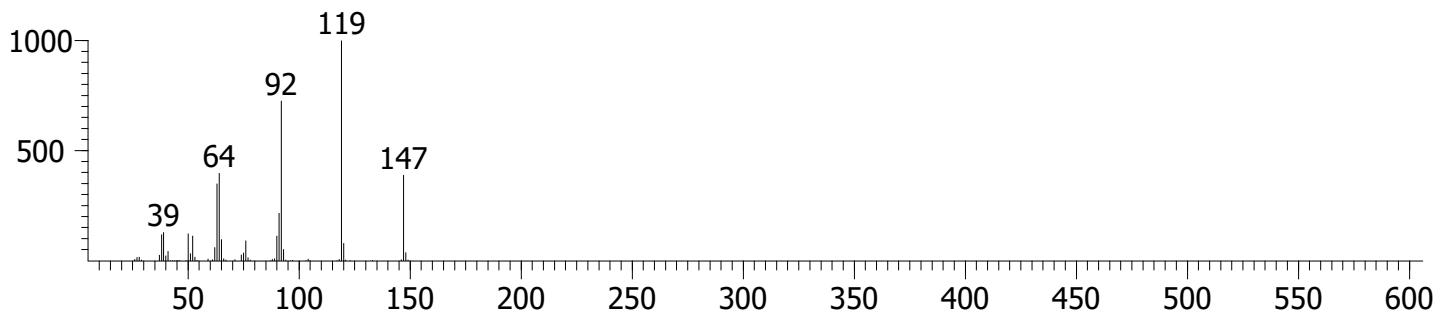

| Hit | Name                                 | Similarity | Probability | CAS        | Library | Formula | Weight |
|-----|--------------------------------------|------------|-------------|------------|---------|---------|--------|
| 1   | 1H-Indole-2,3-dione                  | 890        | 7443        | 91-56-5    | mainlib | C8H5NO2 | 147    |
| 2   | Indole-2,3-dione, 1-(hydroxymethyl)- | 854        | 1840        | 50899-59-7 | mainlib | C9H7NO3 | 177    |
| 3   | Isatoic anhydride                    | 819        | 461         | 118-48-9   | mainlib | C8H5NO3 | 163    |
| 4   | 2,1-Benzisoxazole                    | 795        | 154         | 271-58-9   | mainlib | C7H5NO  | 119    |
| 5   | 3-Amino-2-cyanopyridine              | 741        | 30          | 42242-11-5 | mainlib | C6H5N3  | 119    |

## 3-Methoxyparacetamol

1st Dimension R.T. = 1588.87  
2nd Dimension R.T. = 2.515  
Quant Mass(es) = 124  
S/N = 2960.6  
Area = 1068152  
Height = 93744  
Similarity = 876

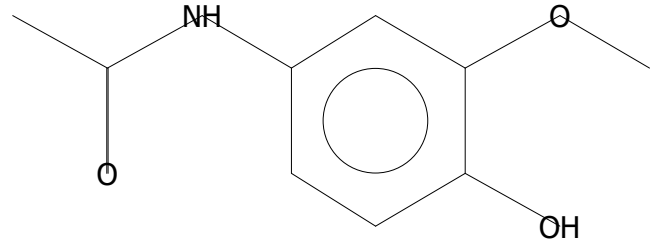

Peak Apex - sample "INF-A comp 092319 (111419):1", peak 4041, at 1588.87 , 2.515 sec , sec (Spec # 1683 91)

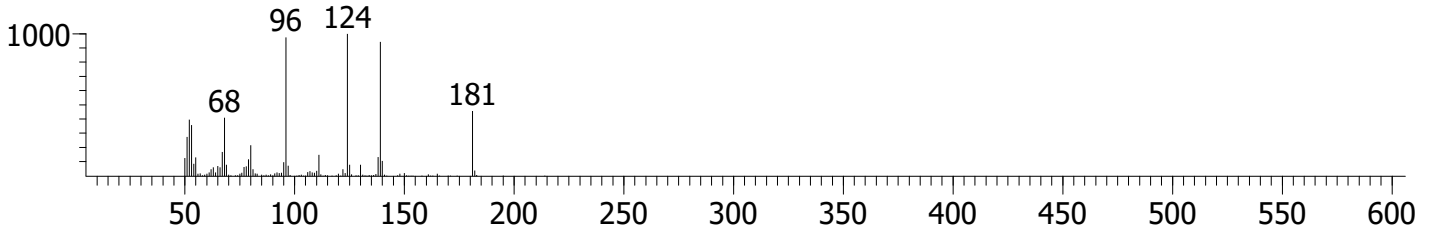

Peak True - sample "INF-A comp 092319 (111419):1", peak 4041, at 1588.87 , 2.515 sec , sec (Spec # 16839 1)

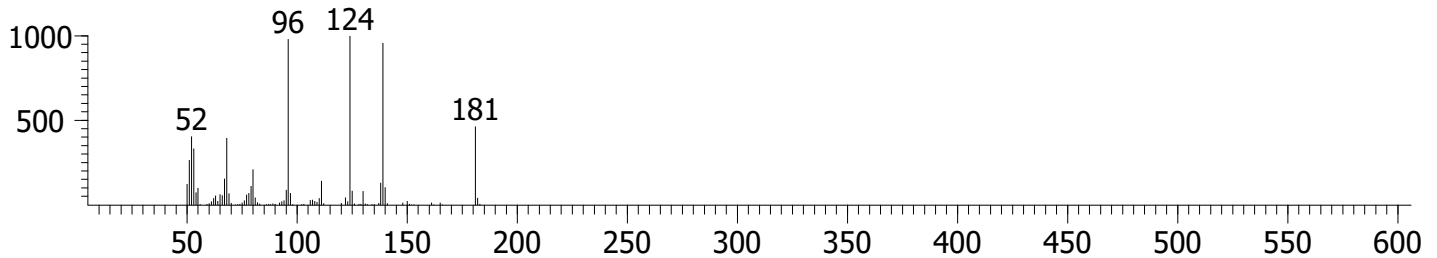

Library Hit - similarity 876, "3-Methoxyparacetamol"

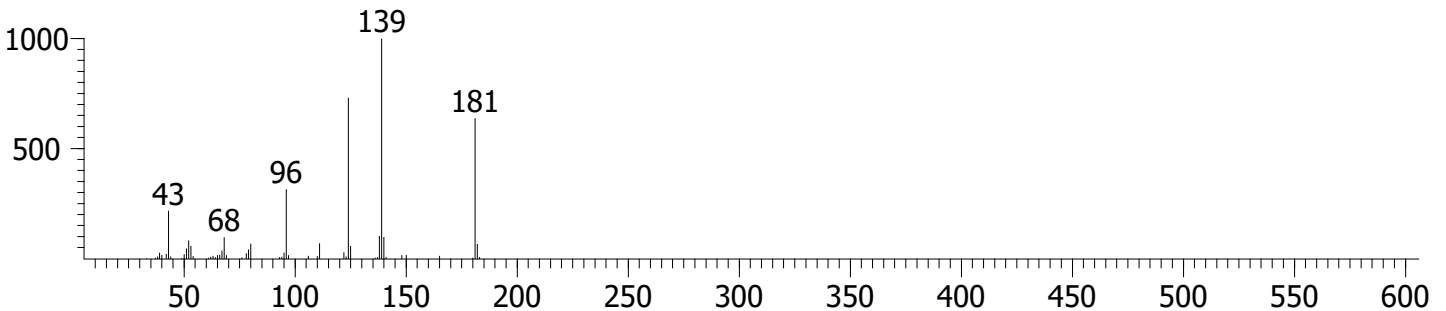

| Hit | Name                                   | Similarity | Probability | CAS        | Library | Formula                                         | Weight |
|-----|----------------------------------------|------------|-------------|------------|---------|-------------------------------------------------|--------|
| 1   | 3-Methoxyparacetamol                   | 876        | 8333        | 3251-55-6  | mainlib | C <sub>9</sub> H <sub>11</sub> NO <sub>3</sub>  | 181    |
| 2   | 5-Amino-2-methoxyphenol                | 780        | 664         | 1687-53-2  | mainlib | C <sub>7</sub> H <sub>9</sub> NO <sub>2</sub>   | 139    |
| 3   | Phenol, 2-amino-4-methoxy-             | 766        | 415         | 0-00-0     | mainlib | C <sub>7</sub> H <sub>9</sub> NO <sub>2</sub>   | 139    |
| 4   | 5-Amino-2-methoxyphenol, N,O-diacetyl- | 765        | 399         | 0-00-0     | mainlib | C <sub>11</sub> H <sub>13</sub> NO <sub>4</sub> | 223    |
| 5   | 4-Acetamidophenol                      | 733        | 106         | 10352-44-0 | mainlib | C <sub>9</sub> H <sub>11</sub> NOS              | 181    |

# Benzene, 1,2,3-trimethyl-

1st Dimension R.T. = 605.928  
2nd Dimension R.T. = 1.307  
Quant Mass(es) = 105  
S/N = 1460.4  
Area = 499290  
Height = 67882  
Similarity = 953

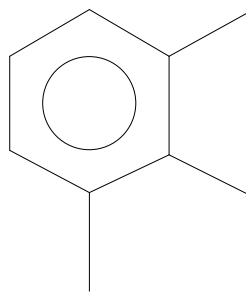

Peak Apex - sample "INF-A grab 100819 (111419):1", peak 245, at 605.928 , 1.307 sec , sec (Spec # 19278)

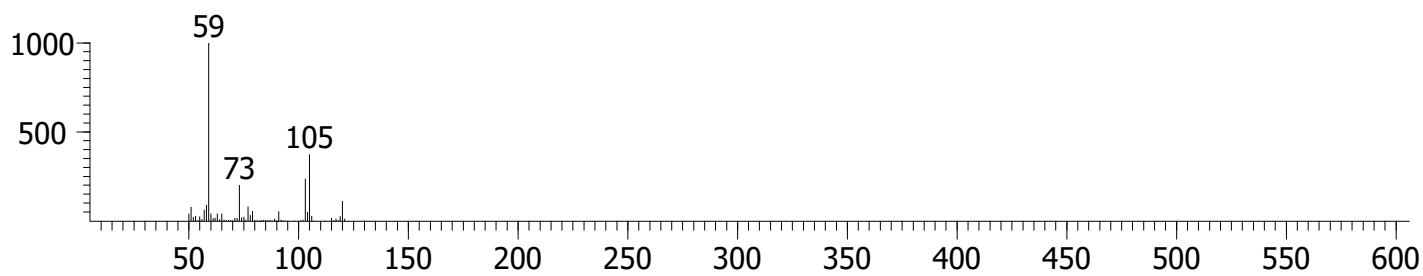

Peak True - sample "INF-A grab 100819 (111419):1", peak 245, at 605.928 , 1.307 sec , sec (Spec # 19278)

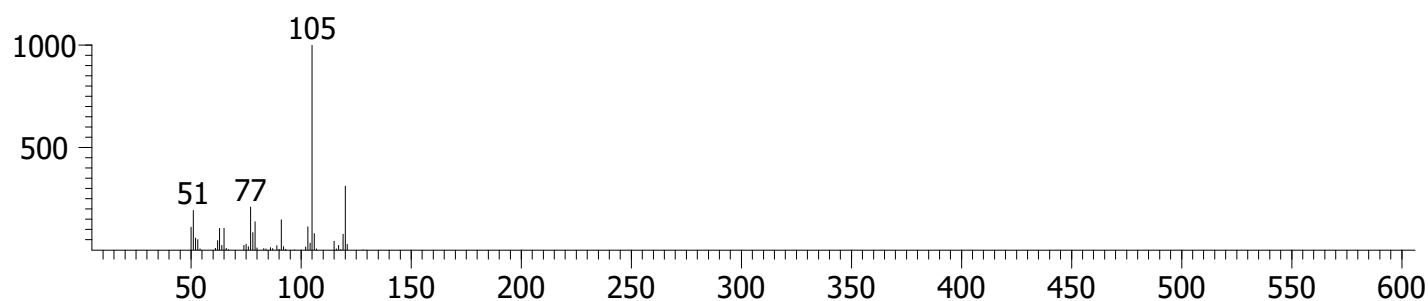

Library Hit - similarity 953, "Benzene, 1,2,3-trimethyl-"

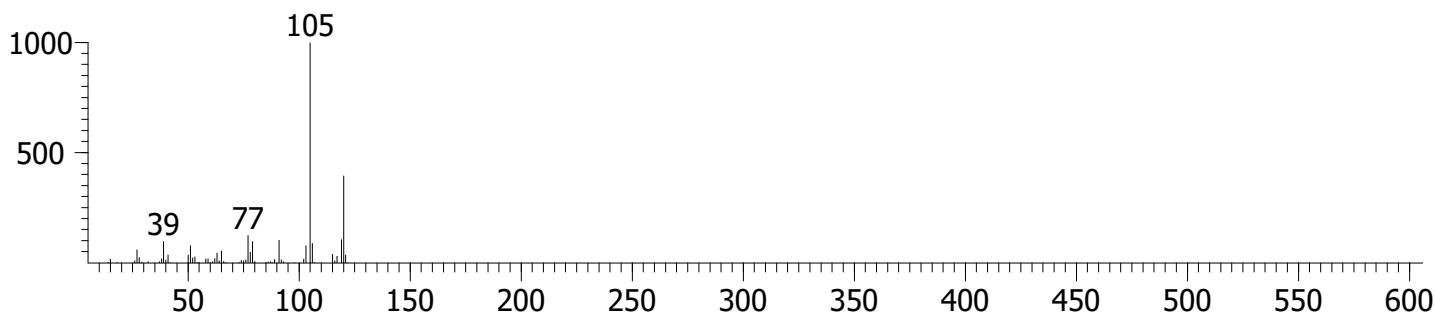

| Hit | Name                       | Similarity | Probability | CAS        | Library | Formula | Weight |
|-----|----------------------------|------------|-------------|------------|---------|---------|--------|
| 1   | Benzene, 1,2,3-trimethyl-  | 953        | 5171        | 526-73-8   | mainlib | C9H12   | 120    |
| 2   | Benzene, 1,2,4-trimethyl-  | 922        | 1409        | 95-63-6    | mainlib | C9H12   | 120    |
| 3   | 2,4-Nonadiyne              | 907        | 854         | 63621-15-8 | mainlib | C9H12   | 120    |
| 4   | Benzene, 1-ethyl-3-methyl- | 893        | 534         | 620-14-4   | mainlib | C9H12   | 120    |
| 5   | Benzene, 1-ethyl-4-methyl- | 891        | 493         | 622-96-8   | mainlib | C9H12   | 120    |

(3-chloro-1-propyl)(1-chloro-2-propyl)phosph

1st Dimension R.T. = 1630.84  
2nd Dimension R.T. = 1.848  
Quant Mass(es) = 99  
S/N = 1027.9  
Area = 262401  
Height = 24673  
Similarity = 734

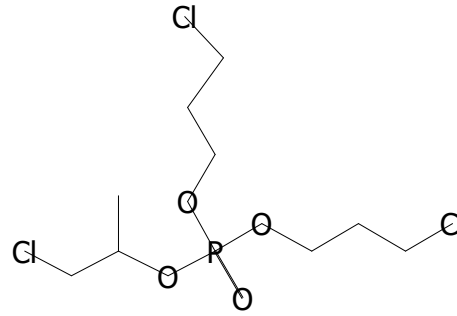

Peak Apex - sample "INF-A grab 100819 (111419):1", peak 3562, at 1630.84 , 1.848 sec , sec (Spec # 174650)

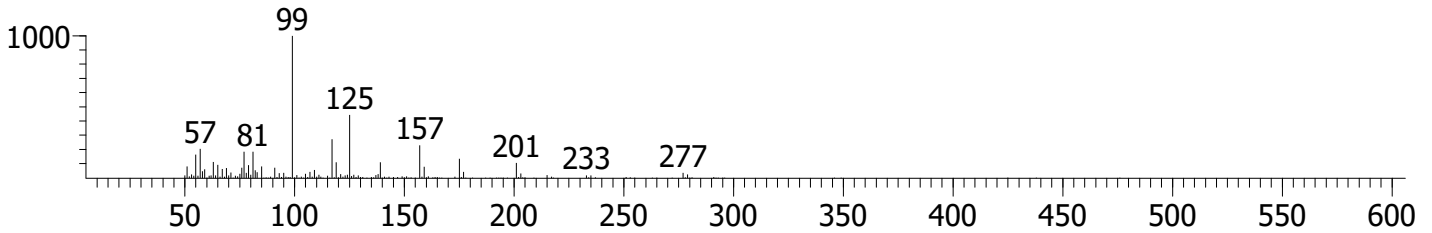

Peak True - sample "INF-A grab 100819 (111419):1", peak 3562, at 1630.84 , 1.848 sec , sec (Spec # 174650)

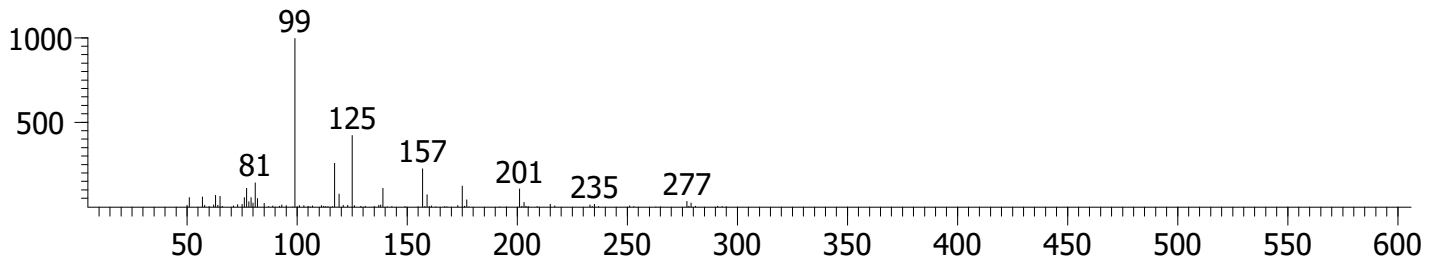

Library Hit - similarity 734, "Bis(3-chloro-1-propyl)(1-chloro-2-propyl)phosphate"

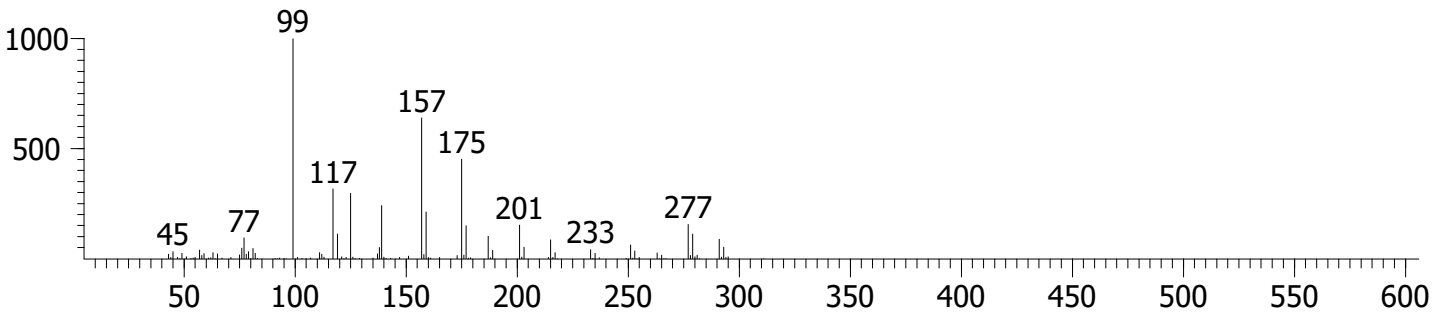

| Hit | Name                                               | Similarity | Probability | CAS         | Library | Formula     | Weight |
|-----|----------------------------------------------------|------------|-------------|-------------|---------|-------------|--------|
| 1   | Bis(3-chloro-1-propyl)(1-chloro-2-propyl)phosphate | 734        | 4328        | 137888-35-8 | mainlib | C9H18Cl3O4P | 326    |
| 2   | Tris(3-chloropropyl) phosphate                     | 732        | 3992        | 1067-98-7   | mainlib | C9H18Cl3O4P | 326    |
| 3   | Bis(1-chloro-2-propyl)(3-chloro-1-propyl)phosphate | 708        | 1337        | 137909-40-1 | mainlib | C9H18Cl3O4P | 326    |
| 4   | 2-Propanol, 1-chloro-, phosphate (3:1)             | 653        | 259         | 13674-84-5  | mainlib | C9H18Cl3O4P | 326    |
| 5   | Sarin                                              | 586        | 40          | 107-44-8    | mainlib | C4H10FO2P   | 140    |

p-Cresol

1st Dimension R.T. = 693.378  
2nd Dimension R.T. = 1.716  
Quant Mass(es) = 107  
S/N = 25689  
Area = 55944330  
Height = 5214309  
Similarity = 941

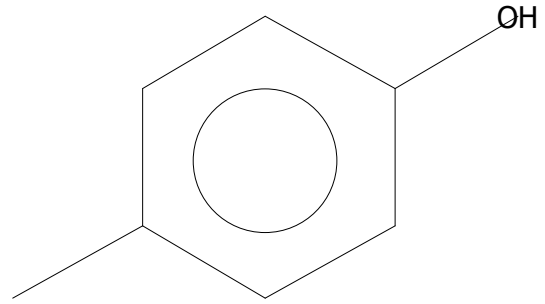

Peak Apex - sample "INF B grab 091919 (20191511):1", peak 342, at 693.378 , 1.716 sec , sec (Spec # 32590)

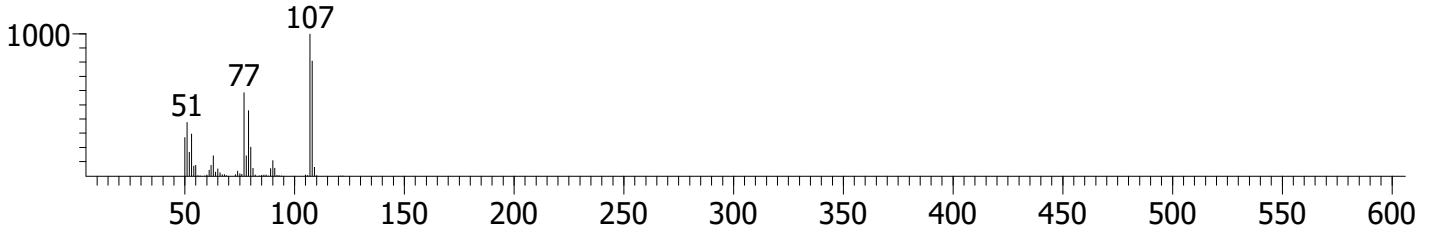

Peak True - sample "INF B grab 091919 (20191511):1", peak 342, at 693.378 , 1.716 sec , sec (Spec # 32590)

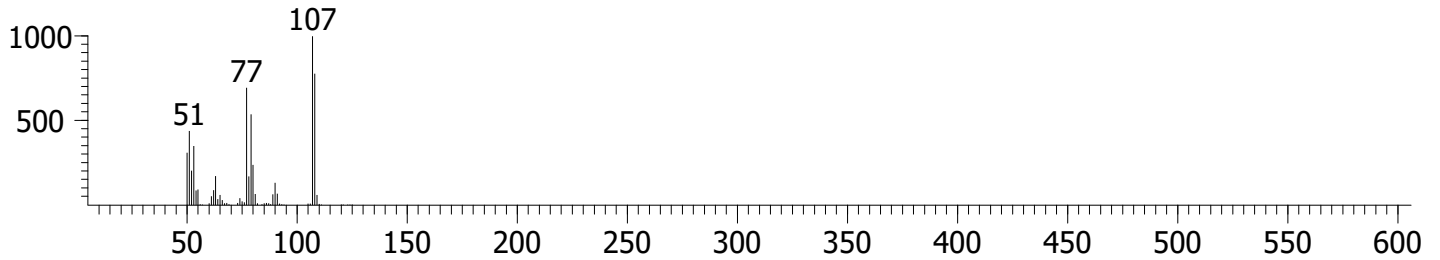

Library Hit - similarity 941, "p-Cresol"

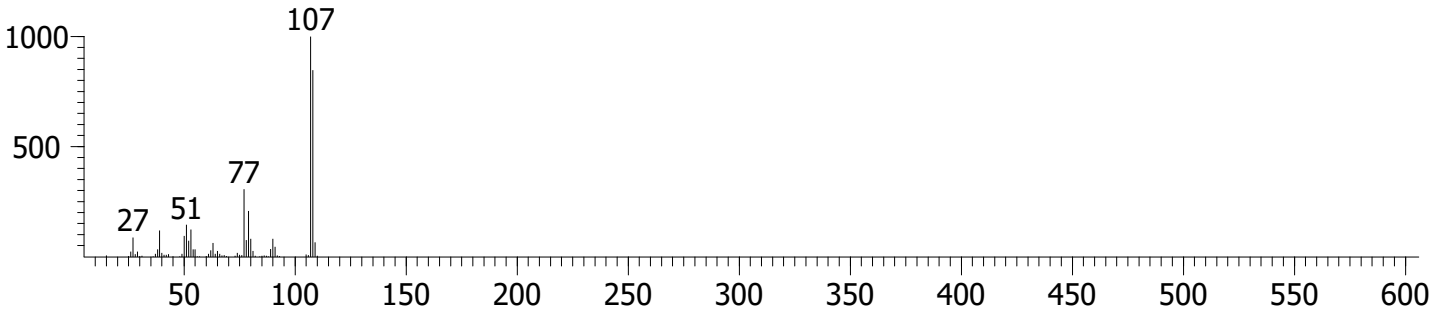

| Hit | Name              | Similarity | Probability | CAS      | Library | Formula | Weight |
|-----|-------------------|------------|-------------|----------|---------|---------|--------|
| 1   | p-Cresol          | 941        | 6818        | 106-44-5 | mainlib | C7H8O   | 108    |
| 2   | Phenol, 3-methyl- | 917        | 2284        | 108-39-4 | mainlib | C7H8O   | 108    |
| 3   | Phenol, 3-methyl- | 916        | 3581        | 108-39-4 | replib  | C7H8O   | 108    |
| 4   | p-Cresol          | 911        | 2886        | 106-44-5 | replib  | C7H8O   | 108    |
| 5   | Phenol, 2-methyl- | 907        | 2438        | 95-48-7  | replib  | C7H8O   | 108    |

# Benzamide, N,N-dimethyl-

1st Dimension R.T. = 2201.02  
2nd Dimension R.T. = 2.501  
Quant Mass(es) = 105  
S/N = 4211.1  
Area = 1712926  
Height = 127431  
Similarity = 915

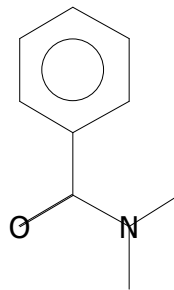

Peak Apex - sample "INF B grab 091919 (20191511):1", peak 3753, at 2201.02 , 2.501 sec , sec (Spec # 261139)

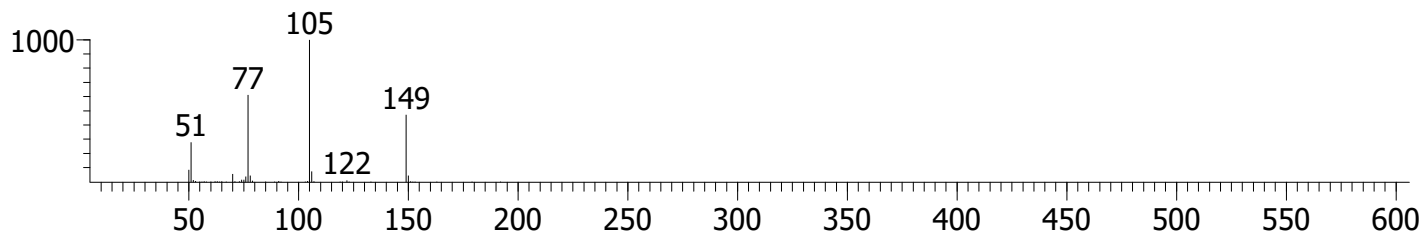

Peak True - sample "INF B grab 091919 (20191511):1", peak 3753, at 2201.02 , 2.501 sec , sec (Spec # 261139)

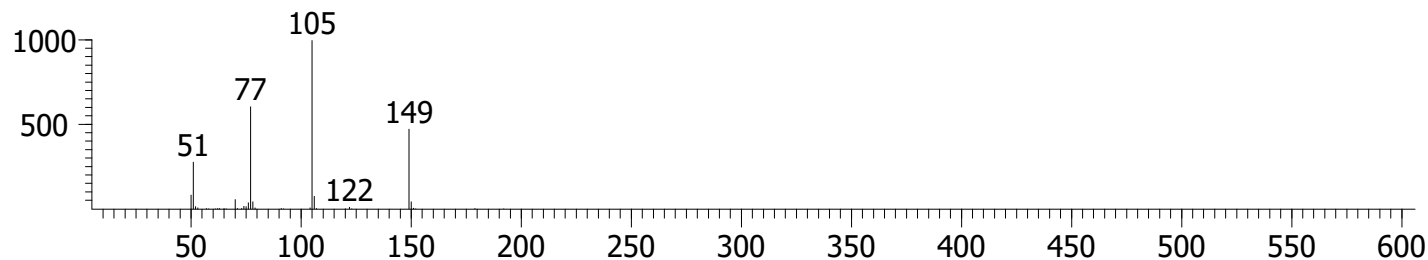

Library Hit - similarity 915, "Benzamide, N,N-dimethyl-"

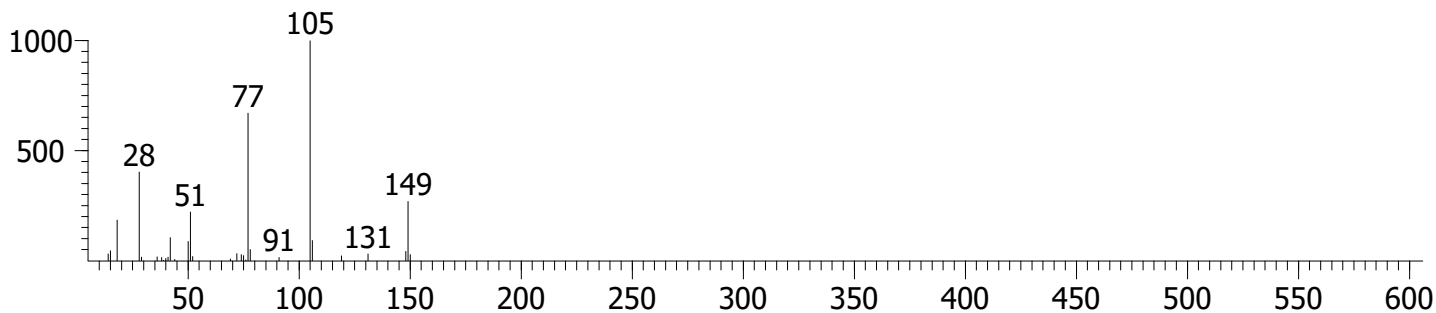

| Hit | Name                                                                  | Similarity | Probability | CAS      | Library | Formula  | Weight |
|-----|-----------------------------------------------------------------------|------------|-------------|----------|---------|----------|--------|
| 1   | Benzamide, N,N-dimethyl-                                              | 915        | 6180        | 611-74-5 | replib  | C9H11NO  | 149    |
| 2   | 2,2'-(Ethane-1,2-diylbis(oxy))bis(ethane-2,1-diyl) dibenzoate         | 855        | 1413        | 0-00-0   | mainlib | C20H22O6 | 358    |
| 3   | Diethylene glycol dibenzoate                                          | 844        | 880         | 120-55-8 | replib  | C18H18O5 | 314    |
| 4   | 2,3-Dimethyl-4a,8a-diphenyl-hexahydro-[1,4]dioxino[2,3-b][1,4]dioxine | 843        | 941         | 0-00-0   | mainlib | C20H22O4 | 326    |
| 5   | 2-Isopropyl-5-methylphenyl benzoate                                   | 838        | 758         | 0-00-0   | mainlib | C17H18O2 | 254    |

# Succinimide

1st Dimension R.T. = 773.832  
2nd Dimension R.T. = 2.409  
Quant Mass(es) = 99  
S/N = 1387.5  
Area = 599059  
Height = 61901  
Similarity = 893

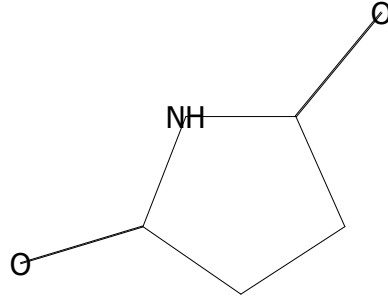

Peak Apex - sample "INF C grab 091919 (20191511):1", peak 542, at 773.832 , 2.409 sec , sec (Spec # 44885)

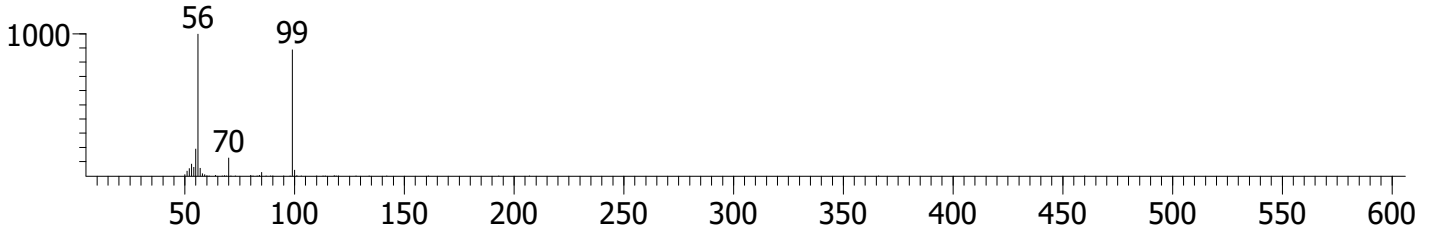

Peak True - sample "INF C grab 091919 (20191511):1", peak 542, at 773.832 , 2.409 sec , sec (Spec # 44885)

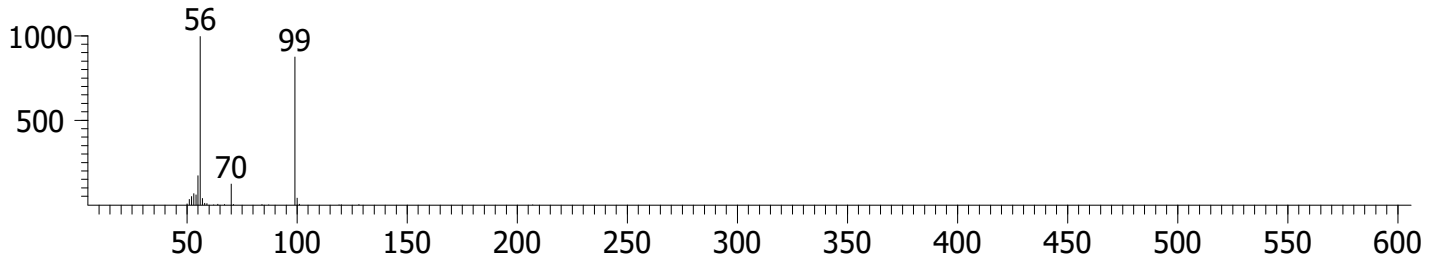

Library Hit - similarity 893, "Succinimide"

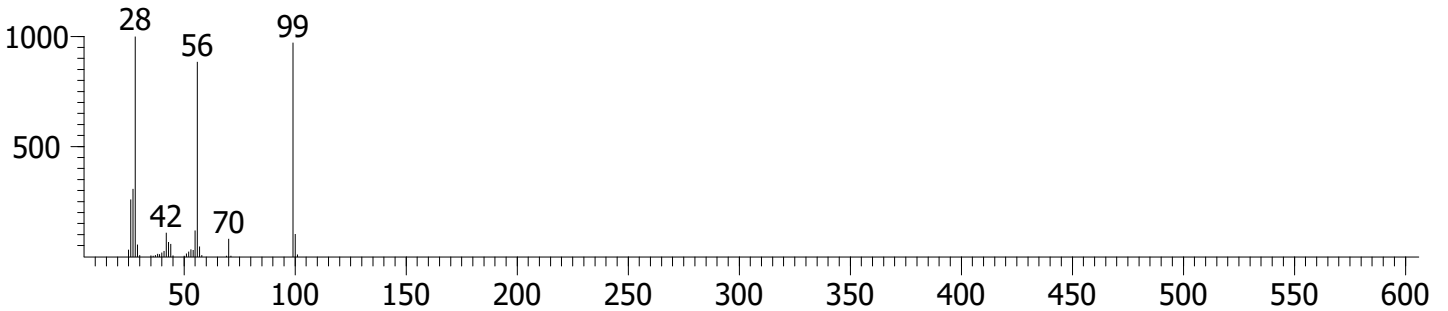

| Hit | Name                             | Similarity | Probability | CAS       | Library   | Formula    | Weight |
|-----|----------------------------------|------------|-------------|-----------|-----------|------------|--------|
| 1   | Succinimide                      | 893        | 8860        | 123-56-8  | replib    | C4H5NO2    | 99     |
| 2   | Succinimide                      | 865        | 8860        | 123-56-8  | replib    | C4H5NO2    | 99     |
| 3   | Succinimide                      | 849        | 8860        | 123-56-8  | replib    | C4H5NO2    | 99     |
| 4   | 2,4,6-Triallyloxy-1,3,5-triazine | 846        | 8600        | 101-37-1  | nist_msms | C12H15N3O3 | 249    |
| 5   | 3-Methyl-2-pyrrolidinone         | 836        | 1519        | 2555-05-7 | mainlib   | C5H9NO     | 99     |

## Octanal, 2-(phenylmethylene)-

1st Dimension R.T. = 1539.89  
2nd Dimension R.T. = 1.769  
Quant Mass(es) = 115  
S/N = 3565.9  
Area = 956405  
Height = 102245  
Similarity = 932

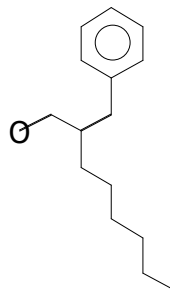

Peak Apex - sample "INF C grab 091919 (20191511):1", peak 2447, at 1539.89 , 1.769 sec , sec (Spec # 160858)

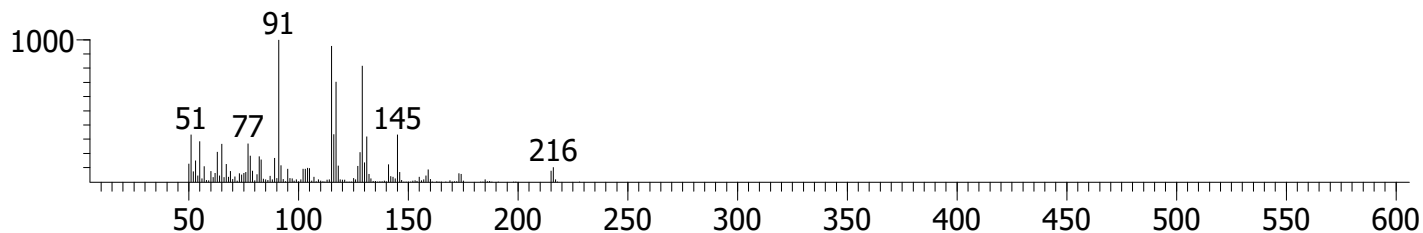

Peak True - sample "INF C grab 091919 (20191511):1", peak 2447, at 1539.89 , 1.769 sec , sec (Spec # 160858)

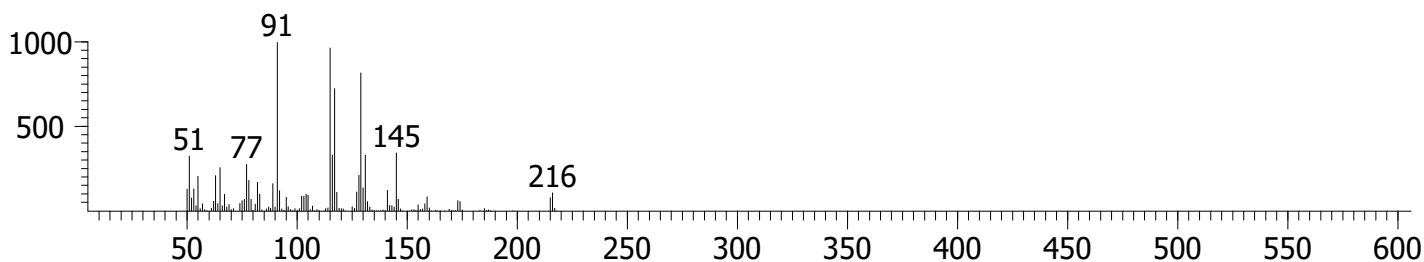

Library Hit - similarity 932, "Octanal, 2-(phenylmethylene)-"

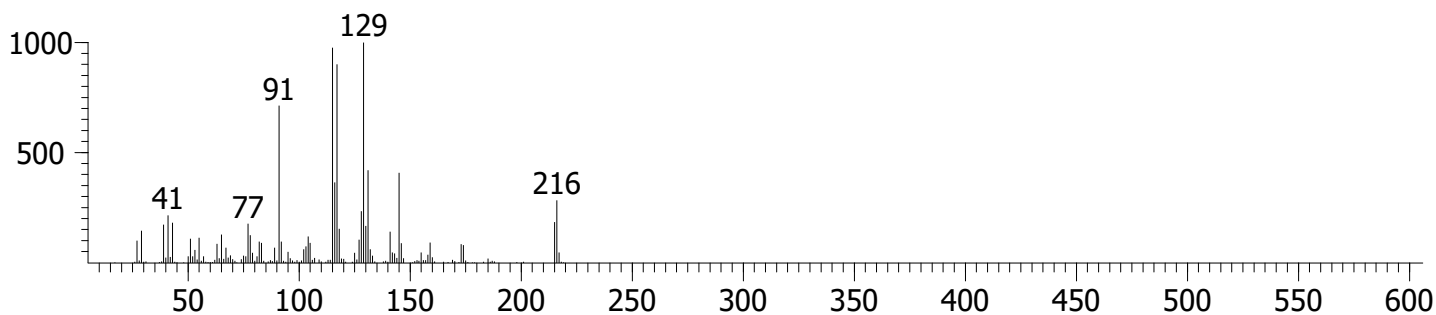

| Hit | Name                          | Similarity | Probability | CAS      | Library | Formula | Weight |
|-----|-------------------------------|------------|-------------|----------|---------|---------|--------|
| 1   | Octanal, 2-(phenylmethylene)- | 932        | 9068        | 101-86-0 | replib  | C15H20O | 216    |
| 2   | Octanal, 2-(phenylmethylene)- | 924        | 9068        | 101-86-0 | replib  | C15H20O | 216    |
| 3   | Octanal, 2-(phenylmethylene)- | 916        | 9068        | 101-86-0 | replib  | C15H20O | 216    |
| 4   | Octanal, 2-(phenylmethylene)- | 857        | 9068        | 101-86-0 | replib  | C15H20O | 216    |
| 5   | Cinnamaldehyde, à-pentyl-     | 838        | 742         | 122-40-7 | replib  | C14H18O | 202    |



## 8,9-Dehydrothymol

1st Dimension R.T. = 1952.66  
2nd Dimension R.T. = 2.554  
Quant Mass(es) = 148  
S/N = 728.26  
Area = 147967  
Height = 12096  
Similarity = 817

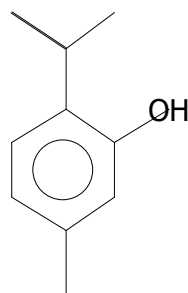

Peak Apex - sample "INF C grab 091919 (20191511):1", peak 3437, at 1952.66 , 2.554 sec , sec (Spec # 223 517)

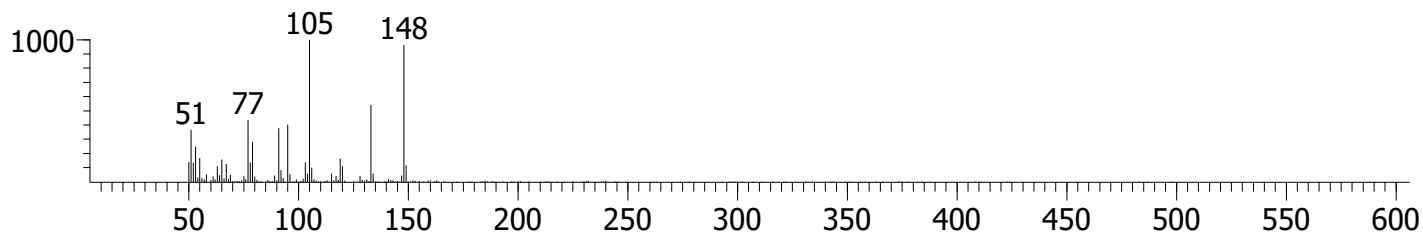

Peak True - sample "INF C grab 091919 (20191511):1", peak 3437, at 1952.66 , 2.554 sec , sec (Spec # 2235 17)

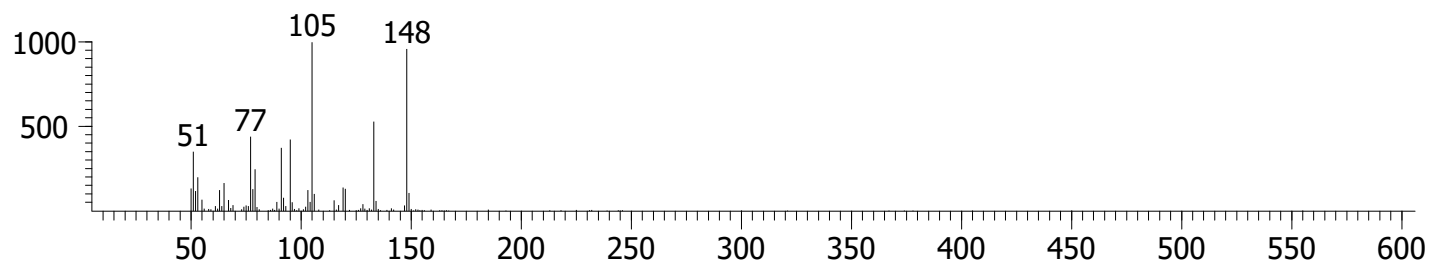

Library Hit - similarity 817, "8,9-Dehydrothymol"

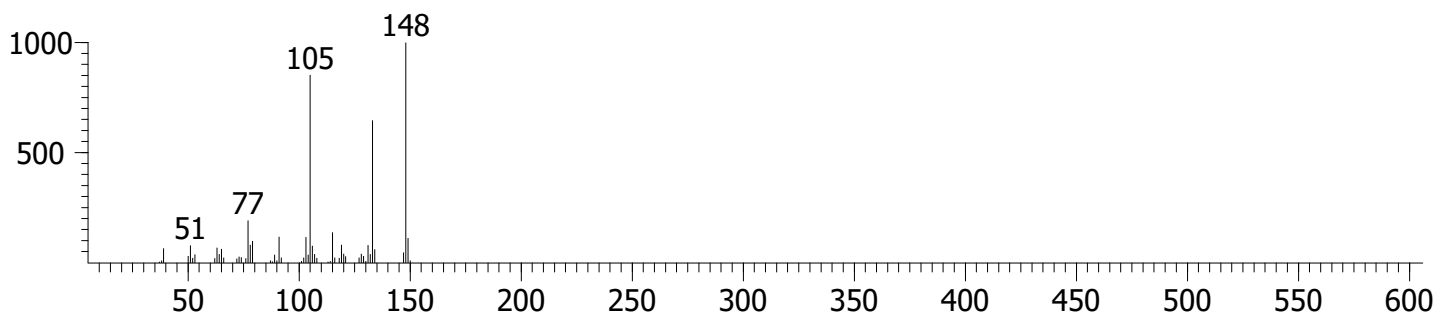

| Hit | Name                                                             | Similarity | Probability | CAS        | Library | Formula | Weight |
|-----|------------------------------------------------------------------|------------|-------------|------------|---------|---------|--------|
| 1   | 8,9-Dehydrothymol                                                | 817        | 2021        | 18612-99-2 | mainlib | C10H12O | 148    |
| 2   | Benzaldehyde, 4-(1-methylethyl)-                                 | 815        | 3712        | 122-03-2   | replib  | C10H12O | 148    |
| 3   | 3,7,7-Trimethyl-1-penta-1,3-dienyl-2-oxabicyclo[3.2.0]hept-3-ene | 802        | 1225        | 0-00-0     | mainlib | C14H20O | 204    |
| 4   | Benzaldehyde, 4-(1-methylethyl)-                                 | 797        | 3712        | 122-03-2   | replib  | C10H12O | 148    |
| 5   | Benzaldehyde, 4-(1-methylethyl)-                                 | 795        | 3712        | 122-03-2   | replib  | C10H12O | 148    |

Benzene, (1-methylethyl)-

1st Dimension R.T. = 623.418  
2nd Dimension R.T. = 1.445  
Quant Mass(es) = 105  
S/N = 2557.3  
Area = 466364  
Height = 65029  
Similarity = 857

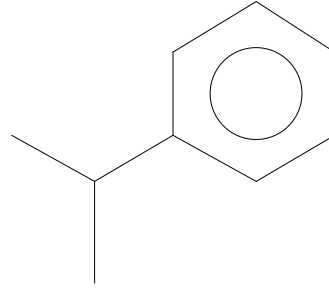

Peak Apex - sample "AerMBR A 092319 (20191119):1", peak 298, at 623.418 , 1.445 sec , sec (Spec # 21949 )

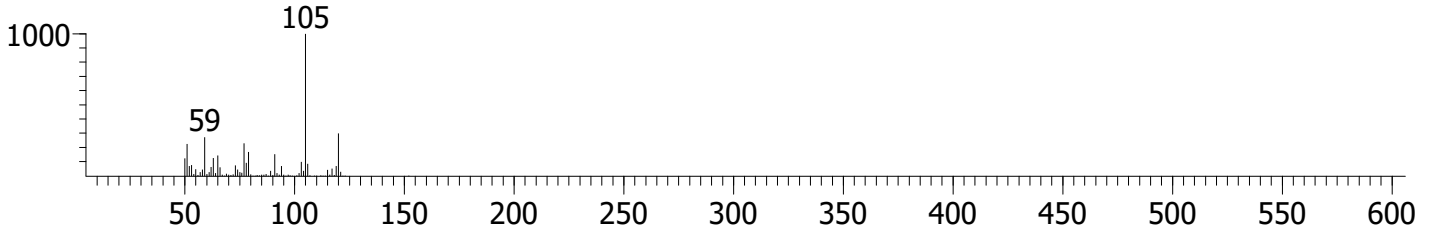

Peak True - sample "AerMBR A 092319 (20191119):1", peak 298, at 623.418 , 1.445 sec , sec (Spec # 21949)

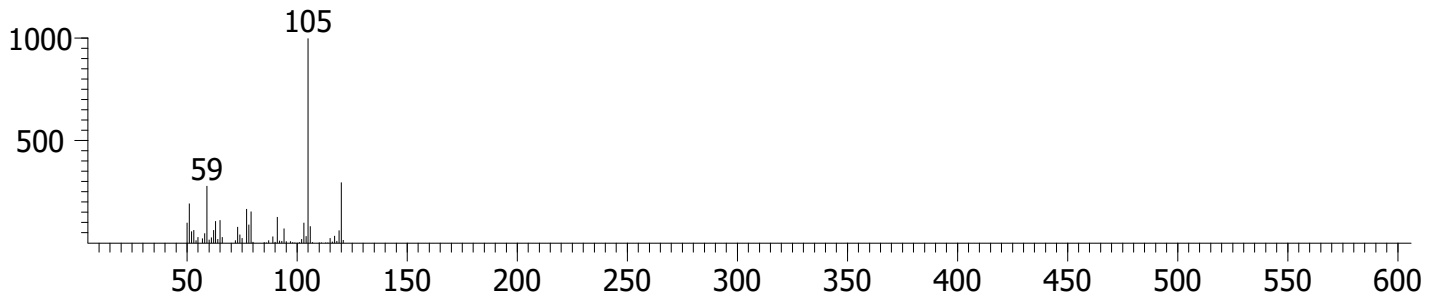

Library Hit - similarity 857, "Benzene, (1-methylethyl)-"

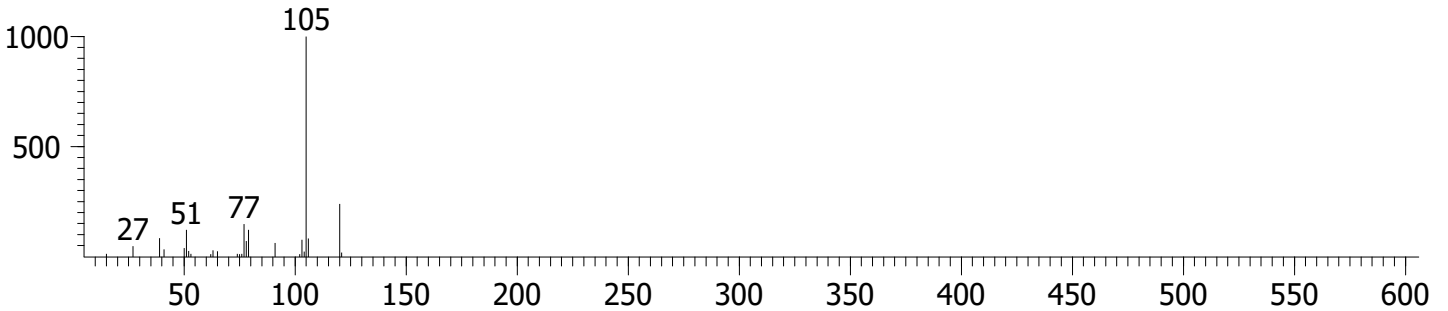

| Hit | Name                               | Similarity | Probability | CAS        | Library | Formula | Weight |
|-----|------------------------------------|------------|-------------|------------|---------|---------|--------|
| 1   | Benzene, (1-methylethyl)-          | 857        | 3008        | 98-82-8    | mainlib | C9H12   | 120    |
| 2   | 2,4-Nonadiyne                      | 846        | 2063        | 63621-15-8 | mainlib | C9H12   | 120    |
| 3   | Benzene, 1,2,3-trimethyl-          | 839        | 1580        | 526-73-8   | mainlib | C9H12   | 120    |
| 4   | 2,3-Heptadien-5-yne, 2,4-dimethyl- | 816        | 577         | 41898-89-9 | mainlib | C9H12   | 120    |
| 5   | Benzene, 1-ethyl-2-methyl-         | 814        | 532         | 611-14-3   | mainlib | C9H12   | 120    |

## Indane

1st Dimension R.T. = 644.406  
2nd Dimension R.T. = 1.544  
Quant Mass(es) = 117  
S/N = 790.90  
Area = 109311  
Height = 15668  
Similarity = 871

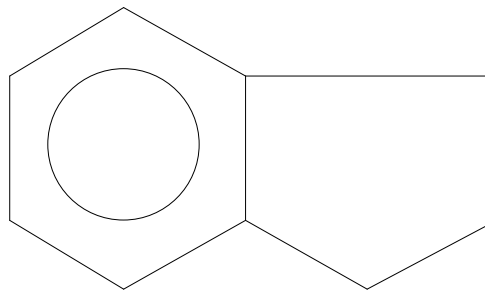

Peak Apex - sample "AerMBR A 092319 (20191119):1", peak 340, at 644.406 , 1.544 sec , sec (Spec # 25144 )

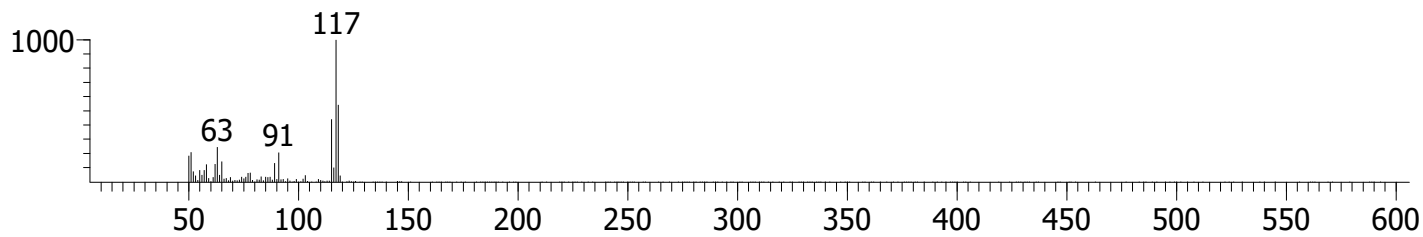

Peak True - sample "AerMBR A 092319 (20191119):1", peak 340, at 644.406 , 1.544 sec , sec (Spec # 25144)

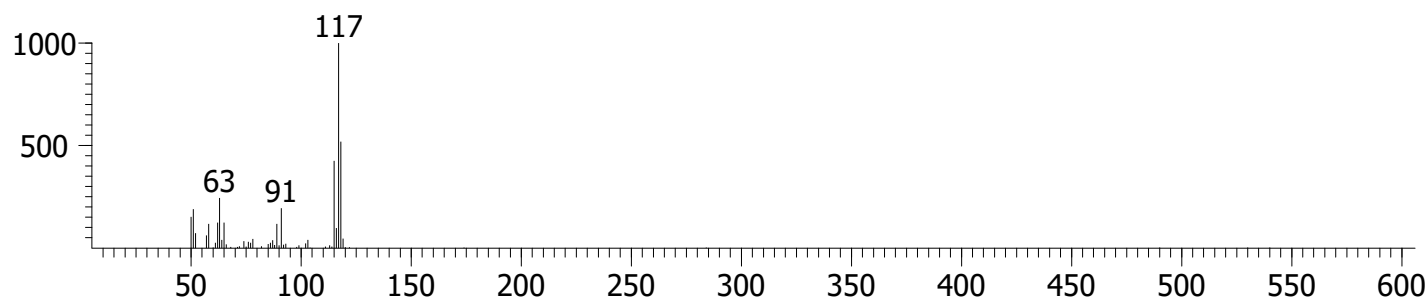

Library Hit - similarity 871, "Indane"

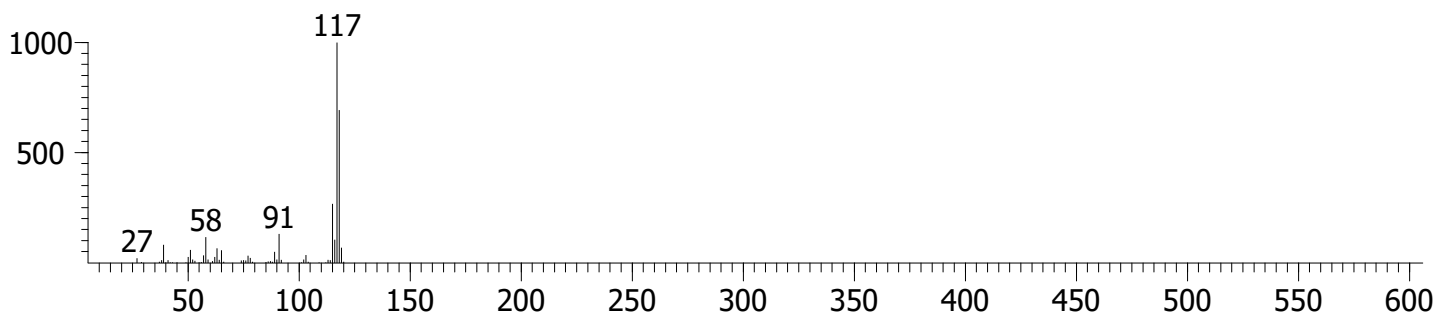

| Hit | Name                                      | Similarity | Probability | CAS       | Library | Formula | Weight |
|-----|-------------------------------------------|------------|-------------|-----------|---------|---------|--------|
| 1   | Indane                                    | 871        | 1570        | 496-11-7  | mainlib | C9H10   | 118    |
| 2   | Benzene, 1-ethenyl-2-methyl-              | 860        | 1077        | 611-15-4  | mainlib | C9H10   | 118    |
| 3   | 3-Bromo-1-phenyl-1-propene                | 859        | 1035        | 4392-24-9 | mainlib | C9H9Br  | 196    |
| 4   | Delta-cyclene                             | 856        | 914         | 7785-10-6 | mainlib | C9H10   | 118    |
| 5   | Tetracyclo[3.3.1.0(2,8).0(4,6)]-non-2-ene | 852        | 772         | 0-00-0    | mainlib | C9H10   | 118    |

Benzoic acid,  
3,5-bis(1,1-dimethylethyl)-2-hydroxy-

1st Dimension R.T. = 1413.97  
2nd Dimension R.T. = 1.610  
Quant Mass(es) = 217  
S/N = 6293.3  
Area = 611256  
Height = 83573  
Similarity = 701

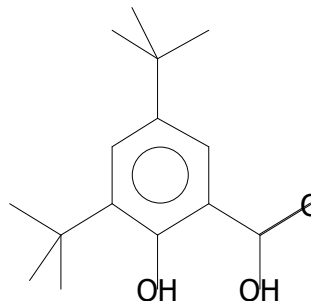

Peak Apex - sample "AerMBR C 091919 (20191119):1", peak 2340, at 1413.97 , 1.610 sec , sec (Spec # 1417 54)

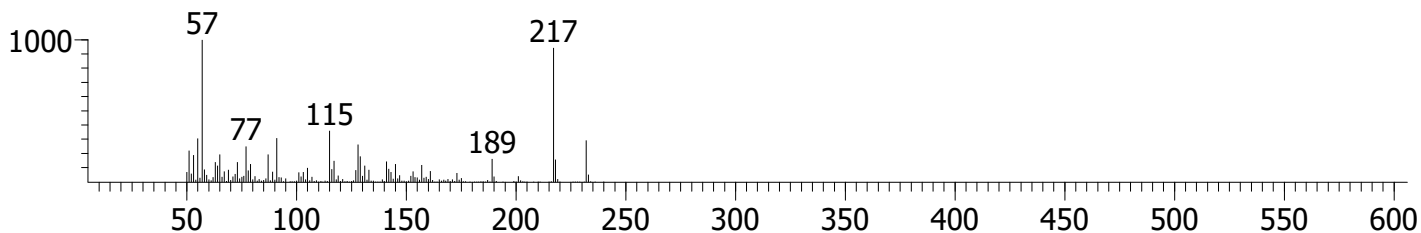

Peak True - sample "AerMBR C 091919 (20191119):1", peak 2340, at 1413.97 , 1.610 sec , sec (Spec # 1417 54)

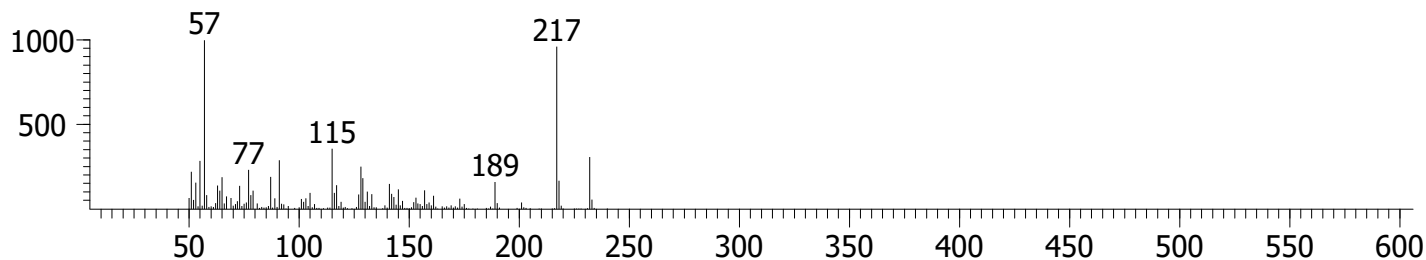

Library Hit - similarity 701, "Benzoic acid, 3,5-bis(1,1-dimethylethyl)-2-hydroxy-"

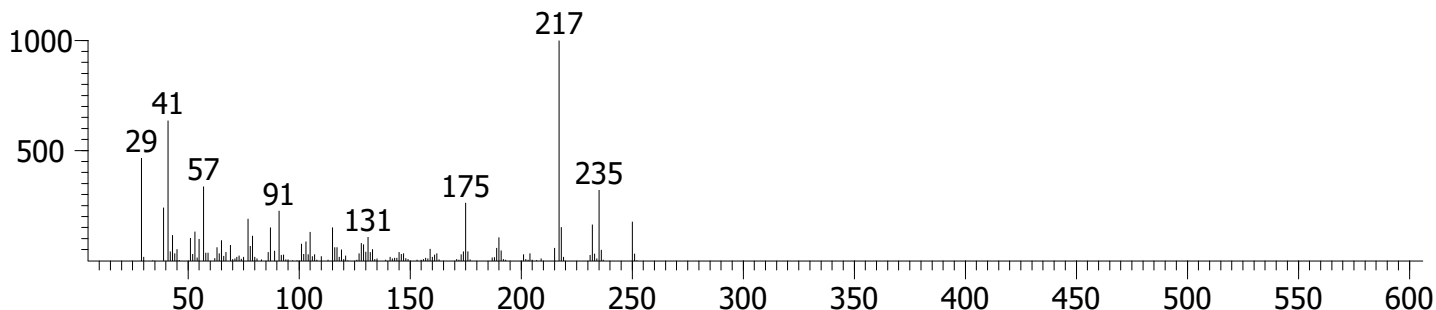

| Hit | Name                                                              | Similarity | Probability | CAS         | Library | Formula    | Weight |
|-----|-------------------------------------------------------------------|------------|-------------|-------------|---------|------------|--------|
| 1   | Benzoic acid, 3,5-bis(1,1-dimethylethyl)-2-hydroxy-               | 701        | 3317        | 19715-19-6  | mainlib | C15H22O3   | 250    |
| 2   | Furan, 2-[(2-ethoxy-3,4-dimethyl-2-cyclohexen-1-ylidene) methyl]- | 682        | 1610        | 55162-49-7  | mainlib | C15H20O2   | 232    |
| 3   | 4-Biphenyl 3,5-di-tert-butylbenzoate                              | 673        | 1169        | 293761-63-4 | mainlib | C27H30O2   | 386    |
| 4   | Benzamide, 3,5-di-tert-butyl-N-(5-methyl-1,3,4-thiadiazol-2-yl)-  | 659        | 732         | 330818-06-9 | mainlib | C18H25N3OS | 331    |
| 5   | 3,4-Xylyl 3,5-di-tert-butylbenzoate                               | 657        | 675         | 293761-66-7 | mainlib | C23H30O2   | 338    |

## Phenol, 3,4-dimethoxy-

1st Dimension R.T. = 1179.6  
2nd Dimension R.T. = 2.132  
Quant Mass(es) = 139  
S/N = 120.35  
Area = 20019  
Height = 2300.1  
Similarity = 805

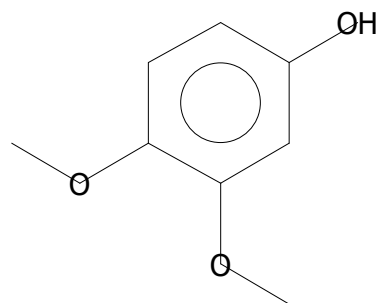

Peak Apex - sample "AerMBR B 091919 (20191119):1", peak 1575, at 1179.6 , 2.132 sec , sec (Spec # 10632 3)

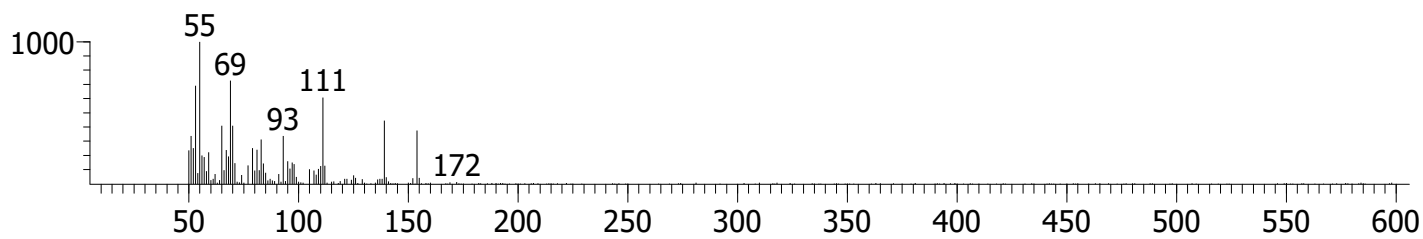

Peak True - sample "AerMBR B 091919 (20191119):1", peak 1575, at 1179.6 , 2.132 sec , sec (Spec # 10632 3)

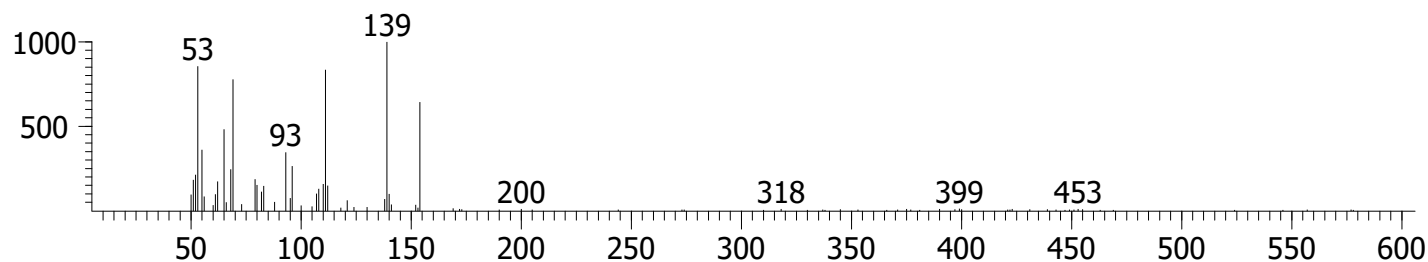

Library Hit - similarity 805, "Phenol, 3,4-dimethoxy-"

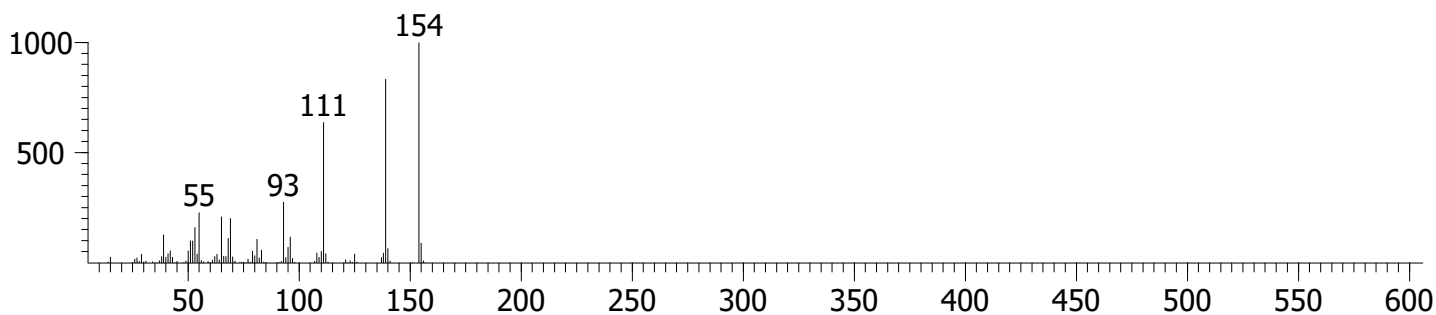

| Hit | Name                            | Similarity | Probability | CAS        | Library | Formula                                        | Weight |
|-----|---------------------------------|------------|-------------|------------|---------|------------------------------------------------|--------|
| 1   | Phenol, 3,4-dimethoxy-          | 805        | 6300        | 2033-89-8  | mainlib | C <sub>8</sub> H <sub>10</sub> O <sub>3</sub>  | 154    |
| 2   | 2,4-Dimethoxyphenol             | 748        | 1180        | 13330-65-9 | mainlib | C <sub>8</sub> H <sub>10</sub> O <sub>3</sub>  | 154    |
| 3   | 2,3-Dimethoxyphenol             | 737        | 810         | 5150-42-5  | mainlib | C <sub>8</sub> H <sub>10</sub> O <sub>3</sub>  | 154    |
| 4   | Phenol, 2,6-dimethoxy-          | 718        | 393         | 91-10-1    | mainlib | C <sub>8</sub> H <sub>10</sub> O <sub>3</sub>  | 154    |
| 5   | Phenol, 3,4-dimethoxy-, acetate | 701        | 214         | 7203-46-5  | mainlib | C <sub>10</sub> H <sub>12</sub> O <sub>4</sub> | 196    |

## 2,2,2-Trichloro-1-phenylethanol

1st Dimension R.T. = 1277.54  
2nd Dimension R.T. = 2.086  
Quant Mass(es) = 107  
S/N = 1337.2  
Area = 582339  
Height = 60999  
Similarity = 893

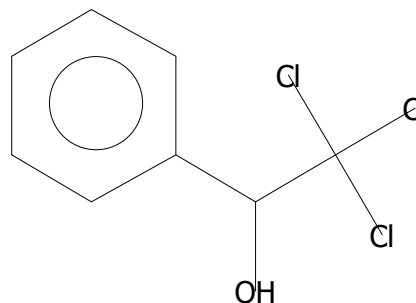

Peak Apex - sample "INF B Comp 091919 (20191122):1", peak 3349, at 1277.54 , 2.086 sec , sec (Spec # 121156)

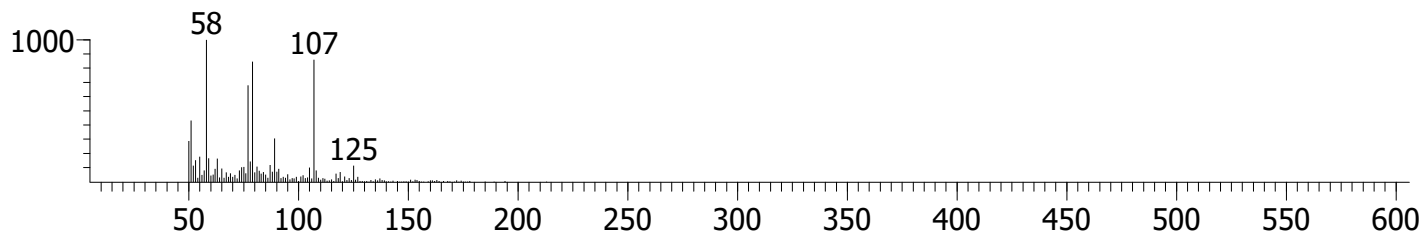

Peak True - sample "INF B Comp 091919 (20191122):1", peak 3349, at 1277.54 , 2.086 sec , sec (Spec # 121156)

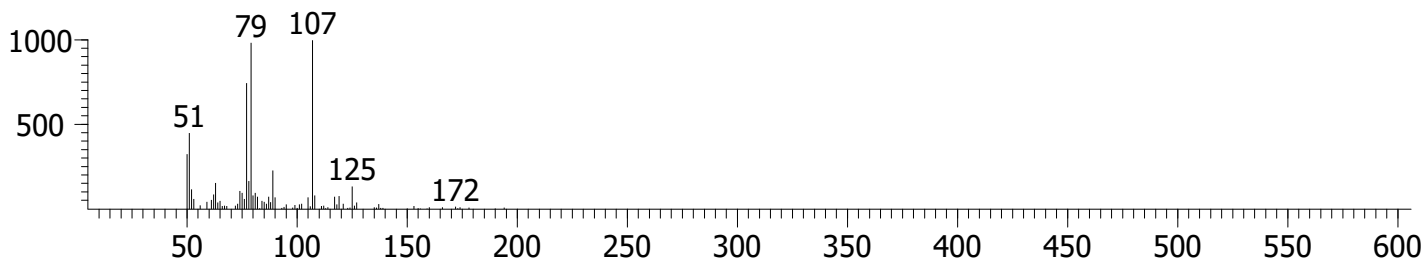

Library Hit - similarity 893, "2,2,2-Trichloro-1-phenylethanol"

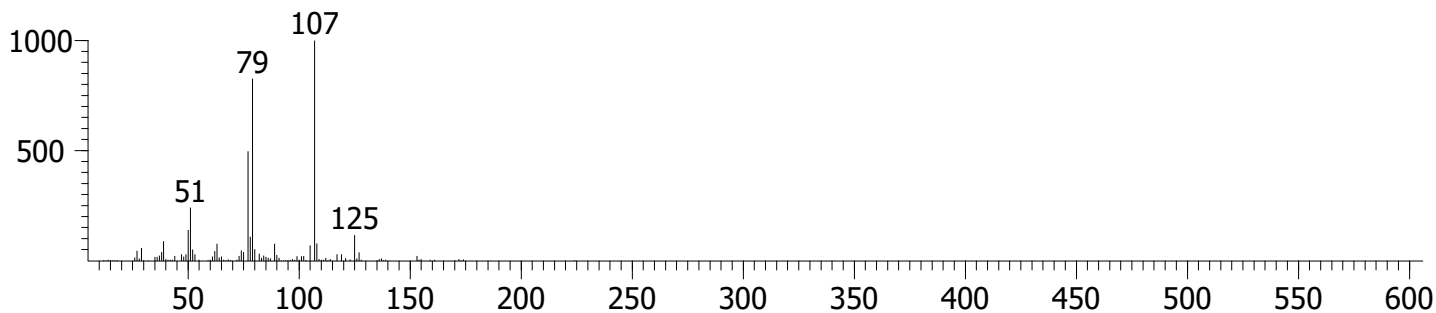

| Hit | Name                                    | Similarity | Probability | CAS       | Library | Formula  | Weight |
|-----|-----------------------------------------|------------|-------------|-----------|---------|----------|--------|
| 1   | 2,2,2-Trichloro-1-phenylethanol         | 893        | 6064        | 2000-43-3 | mainlib | C8H7Cl3O | 224    |
| 2   | Mandelamide                             | 778        | 363         | 4410-31-5 | mainlib | C8H9NO2  | 151    |
| 3   | Benzenemethanol, à-ethyl-               | 766        | 242         | 93-54-9   | mainlib | C9H12O   | 136    |
| 4   | Propionic acid, 2,3-dihydroxy-3-phenyl- | 758        | 180         | 0-00-0    | mainlib | C9H10O4  | 182    |
| 5   | Benzenemethanol, à-methyl-              | 758        | 180         | 98-85-1   | mainlib | C8H10O   | 122    |

## Syringylacetone

1st Dimension R.T. = 1571.38  
 2nd Dimension R.T. = 2.323  
 Quant Mass(es) = 167  
 S/N = 1160.1  
 Area = 163187  
 Height = 14945  
 Similarity = 784

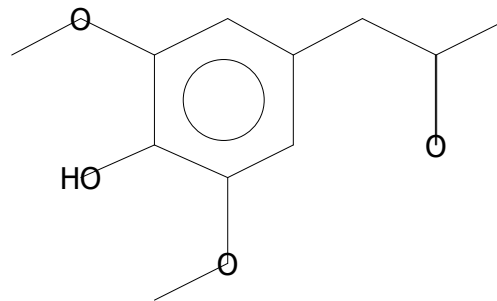

Peak Apex - sample "INF B Comp 091919 (20191122):1", peak 5223, at 1571.38 , 2.323 sec , sec (Spec # 165712)

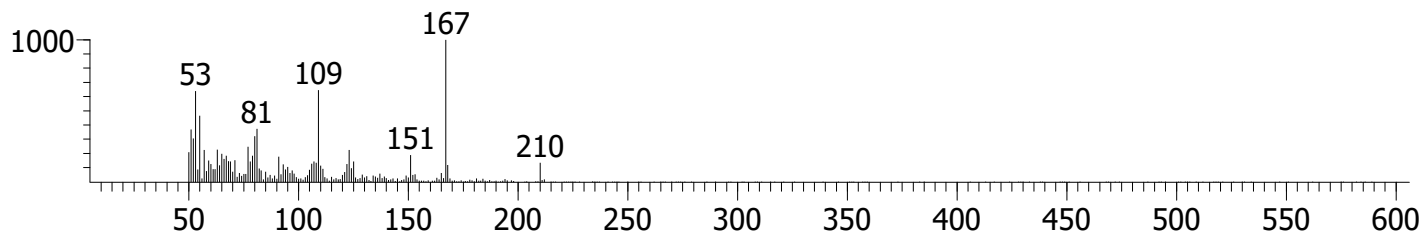

Peak True - sample "INF B Comp 091919 (20191122):1", peak 5223, at 1571.38 , 2.323 sec , sec (Spec # 165712)

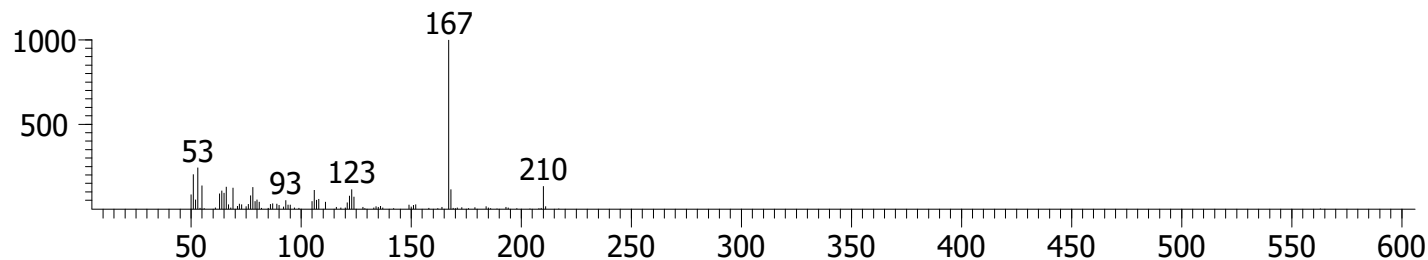

Library Hit - similarity 784, "Syringylacetone"

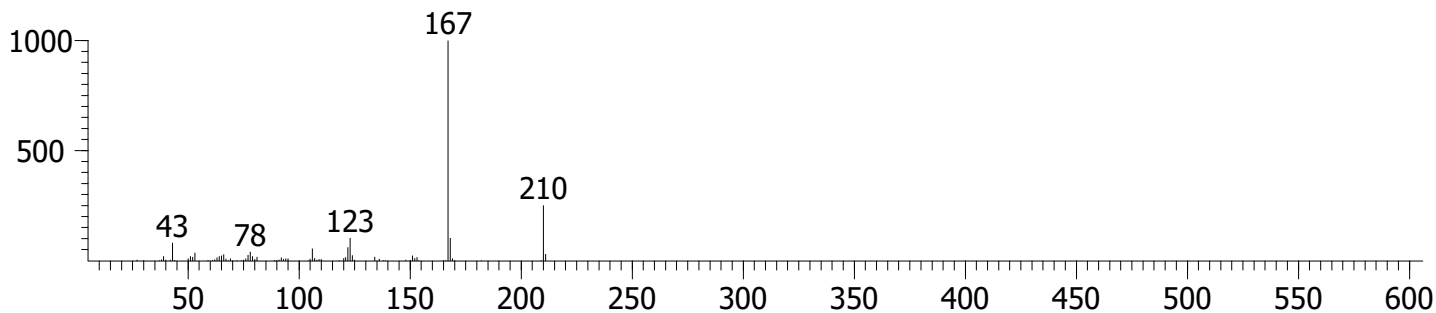

| Hit | Name                                                          | Similarity | Probability | CAS        | Library | Formula                                         | Weight |
|-----|---------------------------------------------------------------|------------|-------------|------------|---------|-------------------------------------------------|--------|
| 1   | Syringylacetone                                               | 784        | 6282        | 19037-58-2 | mainlib | C <sub>11</sub> H <sub>14</sub> O <sub>4</sub>  | 210    |
| 2   | Allylescaline                                                 | 719        | 1011        | 39201-76-8 | mainlib | C <sub>13</sub> H <sub>19</sub> NO <sub>3</sub> | 237    |
| 3   | Homosyringaldehyde                                            | 702        | 552         | 87345-52-6 | mainlib | C <sub>10</sub> H <sub>12</sub> O <sub>4</sub>  | 196    |
| 4   | 2-Pentanone, 1-(2,4,6-trihydroxyphenyl)                       | 702        | 552         | 0-00-0     | mainlib | C <sub>11</sub> H <sub>14</sub> O <sub>4</sub>  | 210    |
| 5   | 2,4-Hexadienedioic acid, 3,4-diethyl-, dimethyl ester, (Z,Z)- | 682        | 251         | 31447-54-8 | mainlib | C <sub>12</sub> H <sub>18</sub> O <sub>4</sub>  | 226    |

# Butanenitrile, 4-(methylthio)-

1st Dimension R.T. = 707.37

2nd Dimension R.T. = 1.973

Quant Mass(es) = 61

S/N = 846.53

Area = 261659

Height = 30309

Similarity = 963

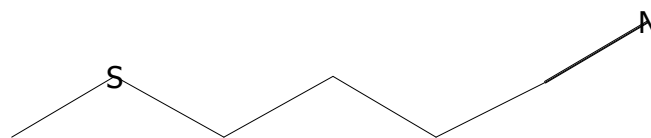

Peak Apex - sample "AnMbr B (20191120):1", peak 511, at 707.37 , 1.973 sec , sec (Spec # 34749)

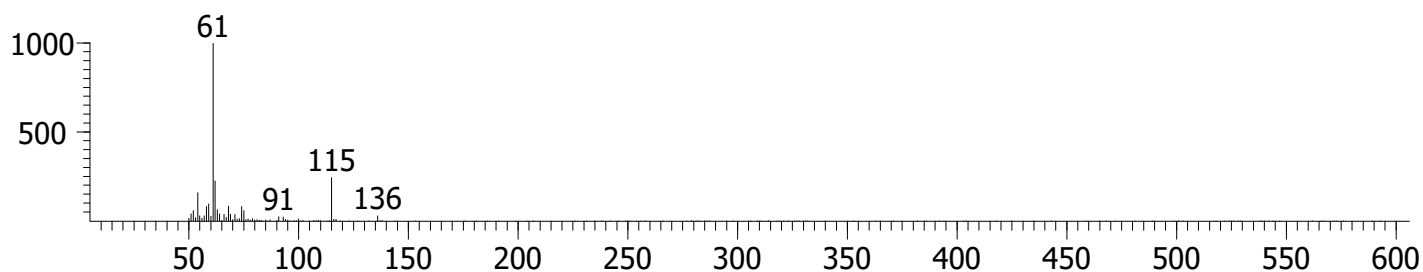

Peak True - sample "AnMbr B (20191120):1", peak 511, at 707.37 , 1.973 sec , sec (Spec # 34749)

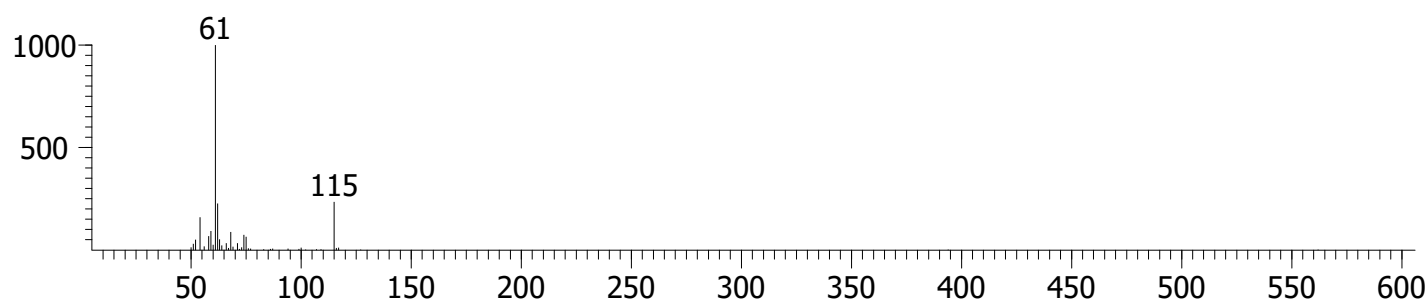

Library Hit - similarity 963, "Butanenitrile, 4-(methylthio)-"

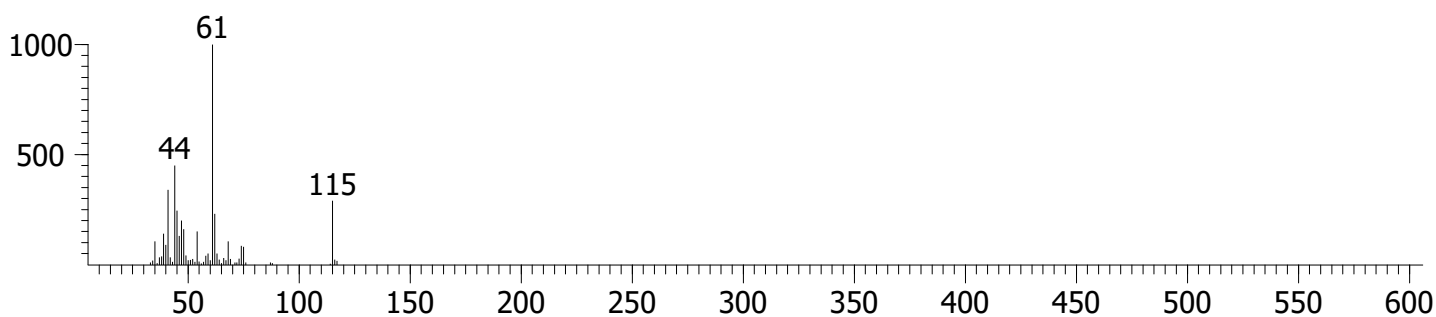

| Hit | Name                           | Similarity | Probability | CAS        | Library | Formula | Weight |
|-----|--------------------------------|------------|-------------|------------|---------|---------|--------|
| 1   | Butanenitrile, 4-(methylthio)- | 963        | 9483        | 59121-24-3 | mainlib | C5H9NS  | 115    |
| 2   | Ethanol, 2-(methylthio)-       | 574        | 94          | 5271-38-5  | mainlib | C3H8OS  | 92     |
| 3   | Silanol, dimethyl-             | 560        | 59          | 5906-76-3  | mainlib | C2H8OSi | 76     |
| 4   | 1-Nitro-2-propanol             | 551        | 43          | 3156-73-8  | mainlib | C3H7NO3 | 105    |
| 5   | Borane-methyl sulfide complex  | 550        | 41          | 13292-87-0 | mainlib | C2H9BS  | 76     |



## 2-Piperidinone, 1-methyl-

1st Dimension R.T. = 819.306  
2nd Dimension R.T. = 2.099  
Quant Mass(es) = 113  
S/N = 145.82  
Area = 25182  
Height = 2979.7  
Similarity = 833

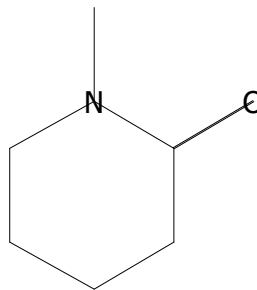

Peak Apex - sample "AnMbr B (20191120):1", peak 900, at 819.306 , 2.099 sec , sec (Spec # 51728)

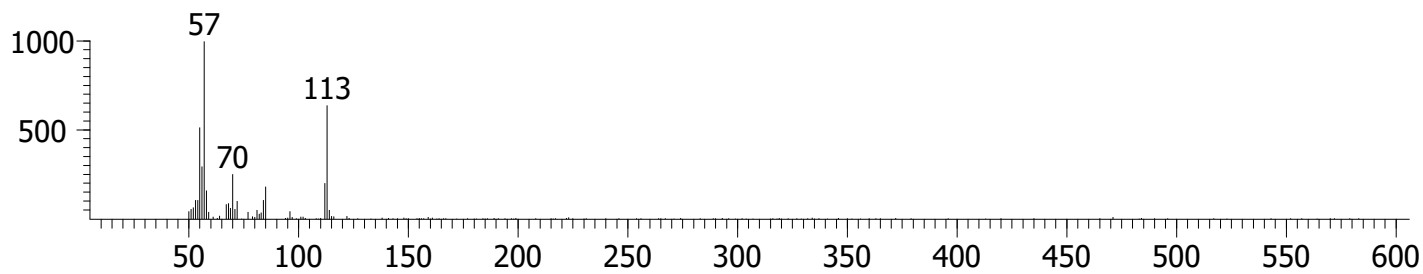

Peak True - sample "AnMbr B (20191120):1", peak 900, at 819.306 , 2.099 sec , sec (Spec # 51728)

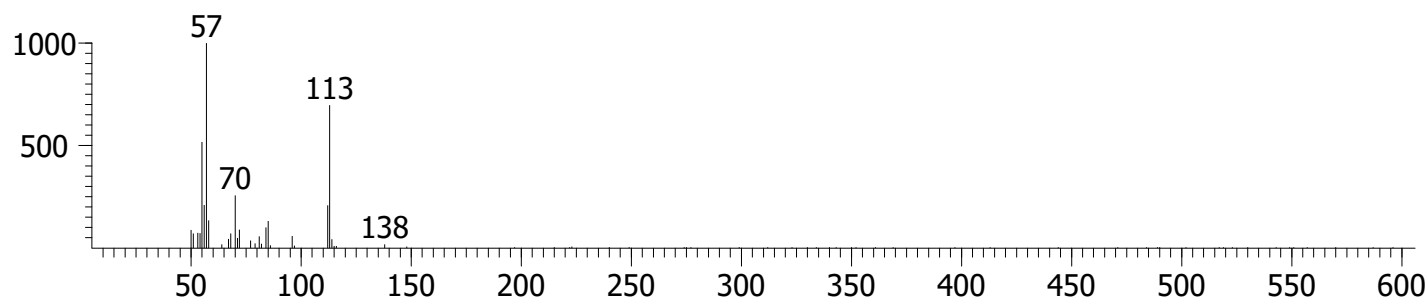

Library Hit - similarity 833, "2-Piperidinone, 1-methyl-"

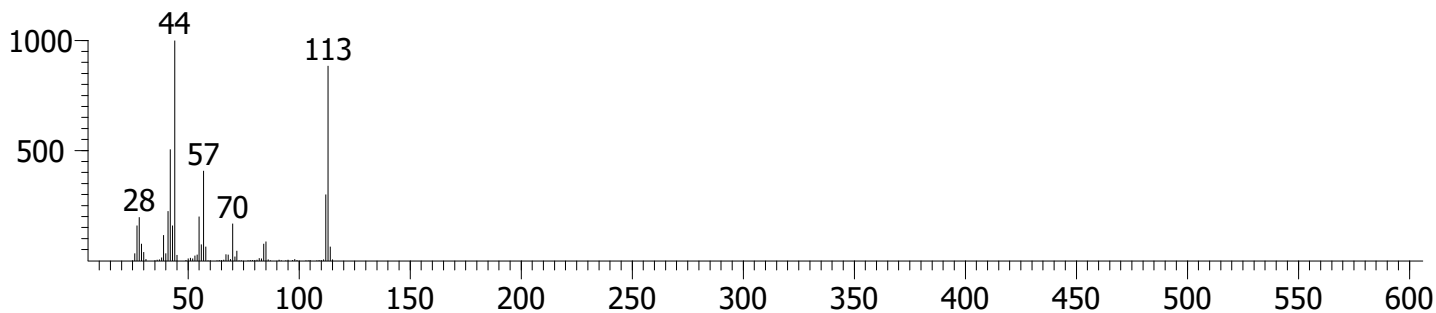

| Hit | Name                                    | Similarity | Probability | CAS        | Library | Formula  | Weight |
|-----|-----------------------------------------|------------|-------------|------------|---------|----------|--------|
| 1   | 2-Piperidinone, 1-methyl-               | 833        | 7723        | 931-20-4   | mainlib | C6H11NO  | 113    |
| 2   | Cyclohexylamine, N-methyl-4,4-dimethyl- | 724        | 500         | 45815-91-6 | mainlib | C9H19N   | 141    |
| 3   | 3,3-Dimethylpiperidine                  | 715        | 363         | 1193-12-0  | mainlib | C7H15N   | 113    |
| 4   | 3-(Prop-2-enoyloxy)dodecane             | 693        | 143         | 0-00-0     | mainlib | C15H28O2 | 240    |
| 5   | 2-Octanone, 1-nitro-                    | 689        | 121         | 16067-01-9 | mainlib | C8H15NO3 | 173    |

## Thiazolidine, 2-ethyl-

1st Dimension R.T. = 826.302  
2nd Dimension R.T. = 2.086  
Quant Mass(es) = 117  
S/N = 295.79  
Area = 45623  
Height = 5208.9  
Similarity = 681

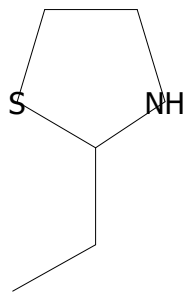

Peak Apex - sample "AnMbr B (20191120):1", peak 924, at 826.302 , 2.086 sec , sec (Spec # 52786)

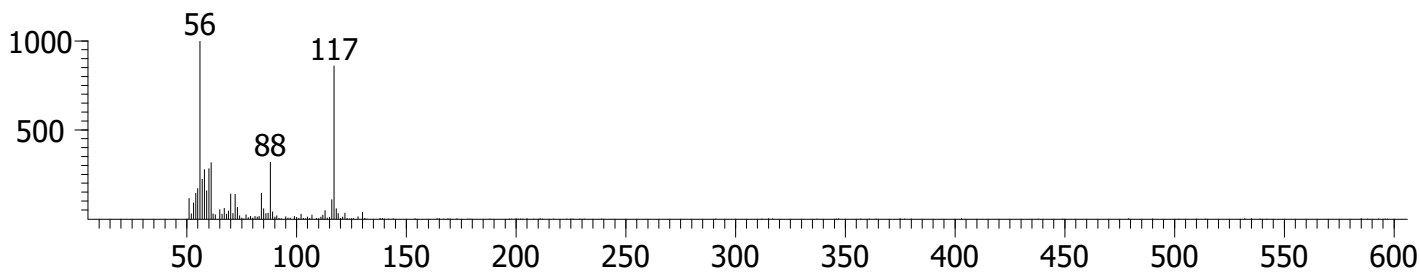

Peak True - sample "AnMbr B (20191120):1", peak 924, at 826.302 , 2.086 sec , sec (Spec # 52786)

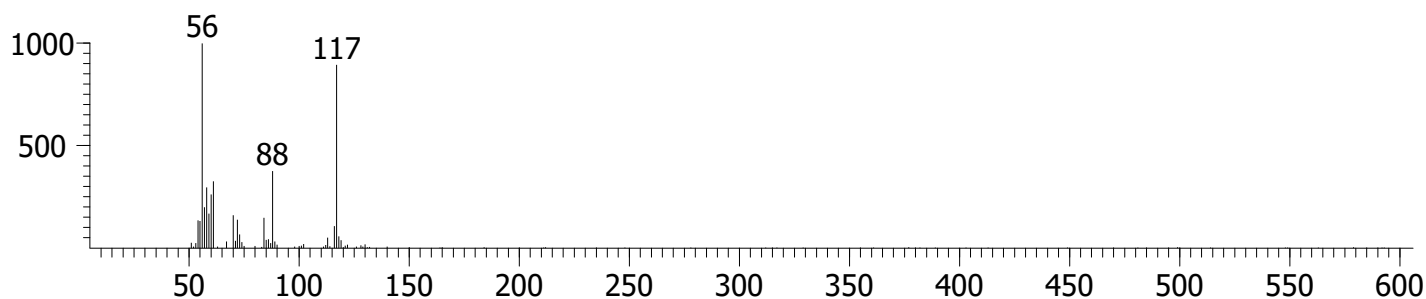

Library Hit - similarity 681, "Thiazolidine, 2-ethyl-"

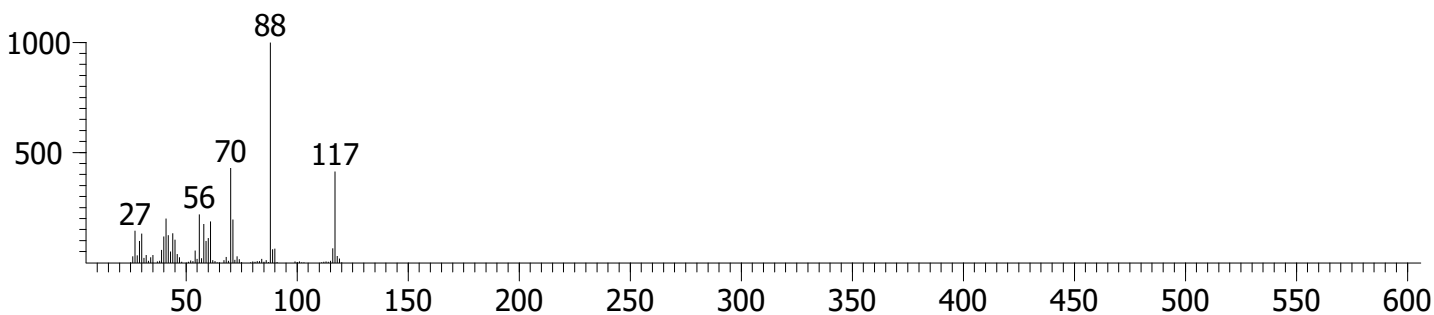

| Hit | Name                                | Similarity | Probability | CAS        | Library | Formula | Weight |
|-----|-------------------------------------|------------|-------------|------------|---------|---------|--------|
| 1   | Thiazolidine, 2-ethyl-              | 681        | 3975        | 24050-09-7 | mainlib | C5H11NS | 117    |
| 2   | Tetrahydro-1,3-oxazine-2-thione     | 664        | 2169        | 17374-18-4 | mainlib | C4H7NOS | 117    |
| 3   | 1-[N-Aziridyl]propane-2-thiol       | 644        | 988         | 0-00-0     | mainlib | C5H11NS | 117    |
| 4   | Ethane, 1-isothiocyanato-2-methoxy- | 639        | 796         | 38663-85-3 | mainlib | C4H7NOS | 117    |
| 5   | 1,3-Oxathiane, 2,6-dimethyl-        | 619        | 362         | 33709-58-9 | mainlib | C6H12OS | 132    |

## 6-Methyl-2-pyridinecarbaldehyde

1st Dimension R.T. = 903.258  
2nd Dimension R.T. = 2.138  
Quant Mass(es) = 121  
S/N = 66.192  
Area = 9554.9  
Height = 1113.2  
Similarity = 750

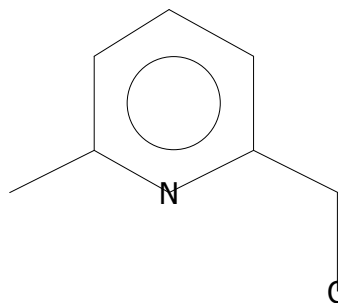

Peak Apex - sample "AnMbr B (20191120):1", peak 1212, at 903.258 , 2.138 sec , sec (Spec # 64454)

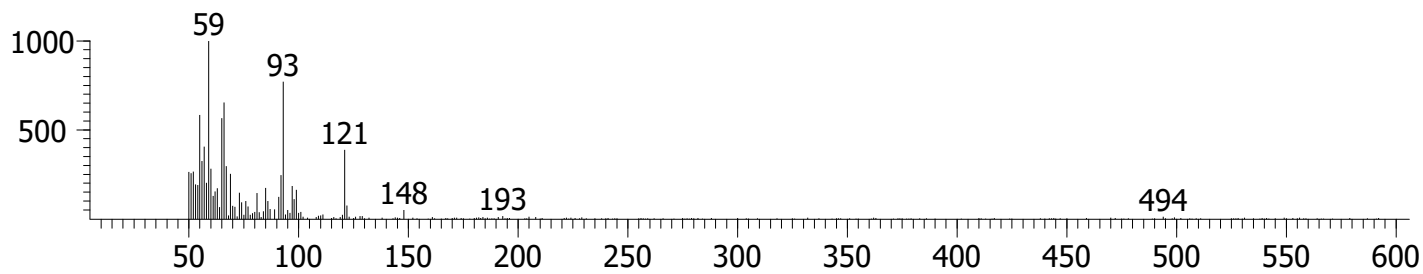

Peak True - sample "AnMbr B (20191120):1", peak 1212, at 903.258 , 2.138 sec , sec (Spec # 64454)

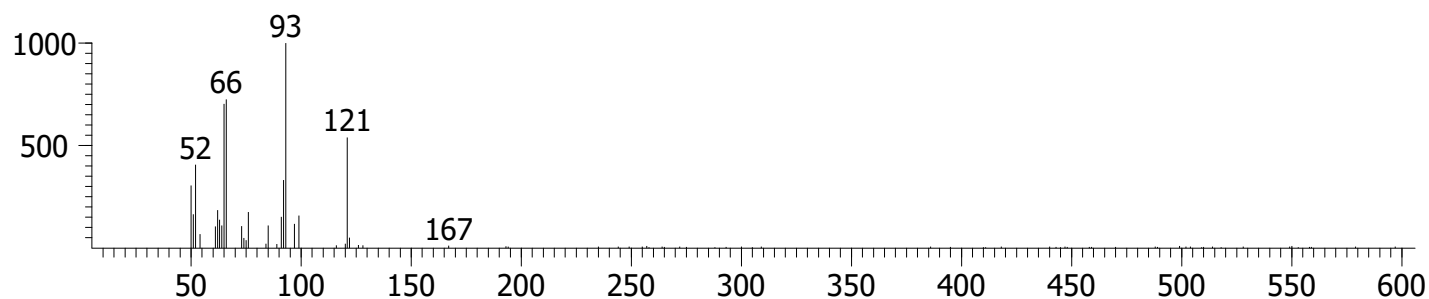

Library Hit - similarity 750, "6-Methyl-2-pyridinecarbaldehyde"

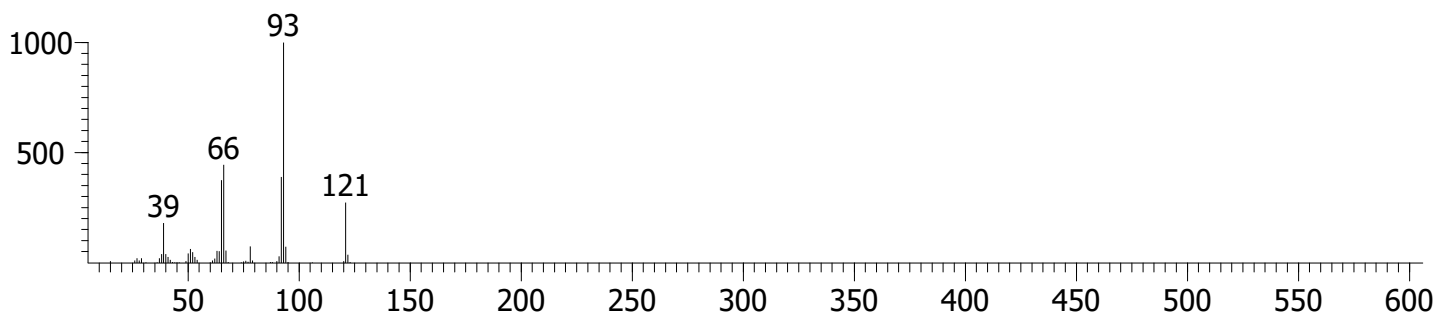

| Hit | Name                                                                                  | Similarity | Probability | CAS        | Library | Formula    | Weight |
|-----|---------------------------------------------------------------------------------------|------------|-------------|------------|---------|------------|--------|
| 1   | 6-Methyl-2-pyridinecarbaldehyde                                                       | 750        | 5340        | 53547-60-7 | mainlib | C7H7NO     | 121    |
| 2   | Formamide, N-phenyl-                                                                  | 727        | 1950        | 103-70-8   | mainlib | C7H7NO     | 121    |
| 3   | 2,4,6-Cycloheptatrien-1-one, 2-amino-                                                 | 696        | 531         | 6264-93-3  | mainlib | C7H7NO     | 121    |
| 4   | 2-Pyridinecarboxylic acid, 6-methyl-                                                  | 681        | 322         | 934-60-1   | mainlib | C7H7NO2    | 137    |
| 5   | Benzhydrazide, 4-hydroxy-N2-(4,5,6,7-tetrahydro-5-hydroximinobenzofurazan-4-ylideno)- | 672        | 233         | 0-00-0     | mainlib | C13H11N5O4 | 301    |

## Ethanol, 2-phenoxy-

1st Dimension R.T. = 948.732

2nd Dimension R.T. = 1.762

Quant Mass(es) = 138

S/N = 394.50

Area = 31913

Height = 3745.9

Similarity = 743

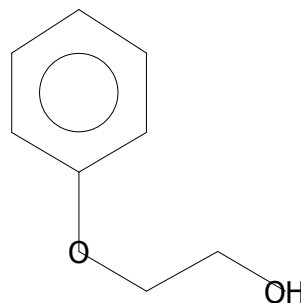

Peak Apex - sample "AnMbr B (20191120):1", peak 1406, at 948.732 , 1.762 sec , sec (Spec # 71287)

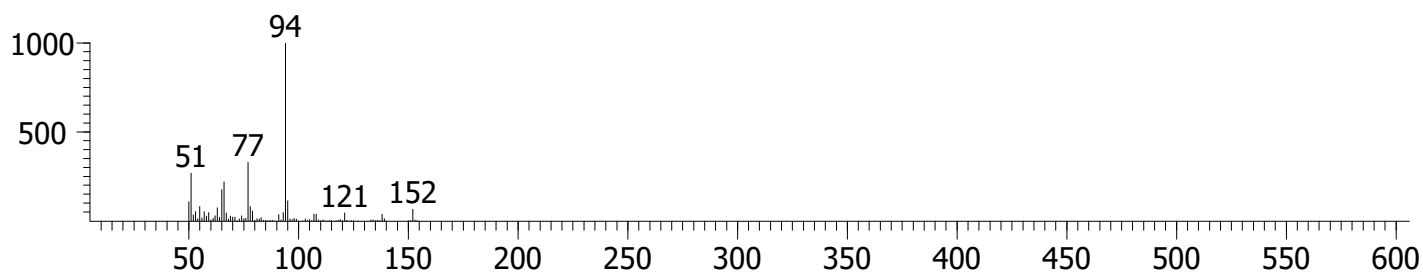

Peak True - sample "AnMbr B (20191120):1", peak 1406, at 948.732 , 1.762 sec , sec (Spec # 71287)

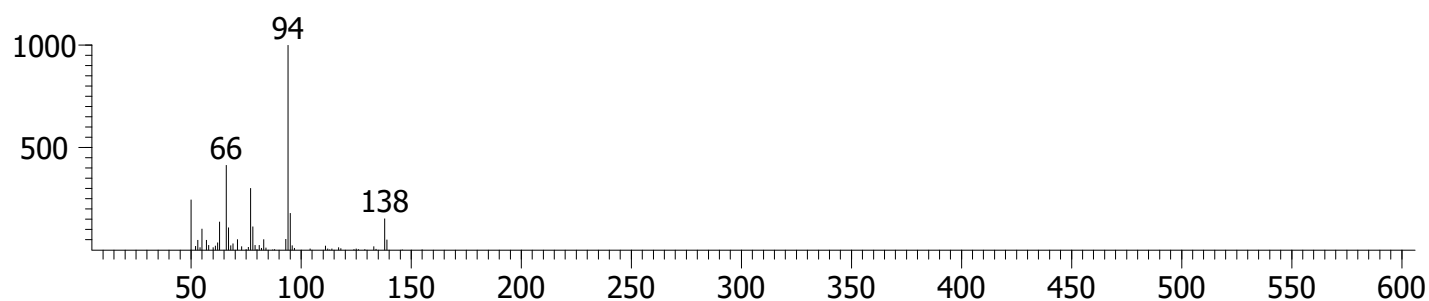

Library Hit - similarity 743, "Ethanol, 2-phenoxy-"

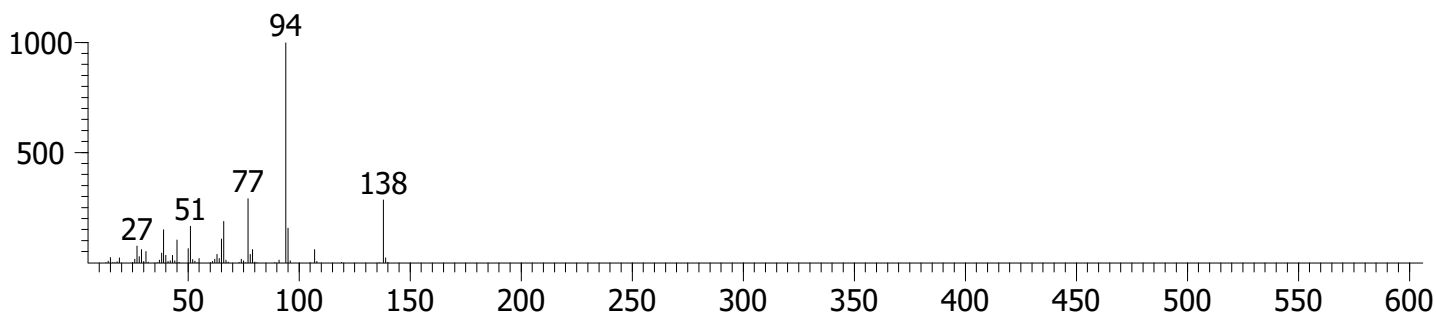

| Hit | Name                                          | Similarity | Probability | CAS        | Library | Formula   | Weight |
|-----|-----------------------------------------------|------------|-------------|------------|---------|-----------|--------|
| 1   | Ethanol, 2-phenoxy-                           | 743        | 4231        | 122-99-6   | mainlib | C8H10O2   | 138    |
| 2   | Pyrimidine, 5-methyl-                         | 733        | 2987        | 2036-41-1  | mainlib | C5H6N2    | 94     |
| 3   | 1H-imidazole, 5-bicyclo[2.2.1]hept-5-en-2-yl- | 689        | 647         | 0-00-0     | mainlib | C10H12N2  | 160    |
| 4   | Acetic acid, bromo-, phenyl ester             | 667        | 256         | 620-72-4   | mainlib | C8H7BrO2  | 214    |
| 5   | Carbamic acid, butylmethyl-, phenyl ester     | 662        | 206         | 54644-61-0 | mainlib | C12H17NO2 | 207    |

# Benzeneethanol, 4-hydroxy-

1st Dimension R.T. = 1204.09  
2nd Dimension R.T. = 2.066  
Quant Mass(es) = 107  
S/N = 376.13  
Area = 176455  
Height = 17334  
Similarity = 761

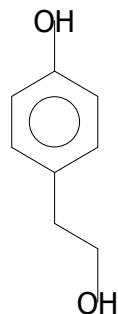

Peak Apex - sample "AnMbr B (20191120):1", peak 2541, at 1204.09 , 2.066 sec , sec (Spec # 110023)

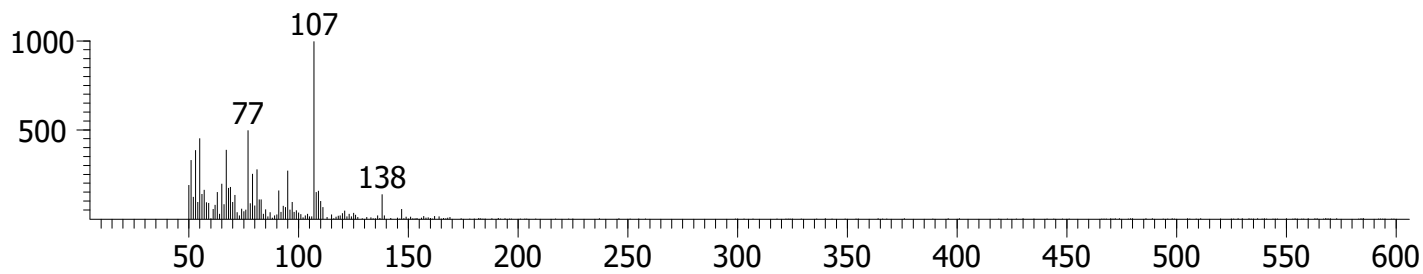

Peak True - sample "AnMbr B (20191120):1", peak 2541, at 1204.09 , 2.066 sec , sec (Spec # 110023)

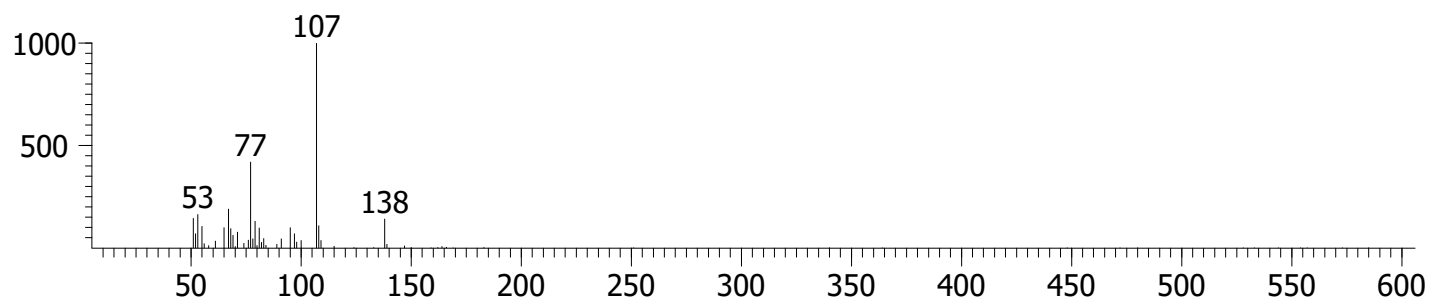

Library Hit - similarity 761, "Benzeneethanol, 4-hydroxy-"

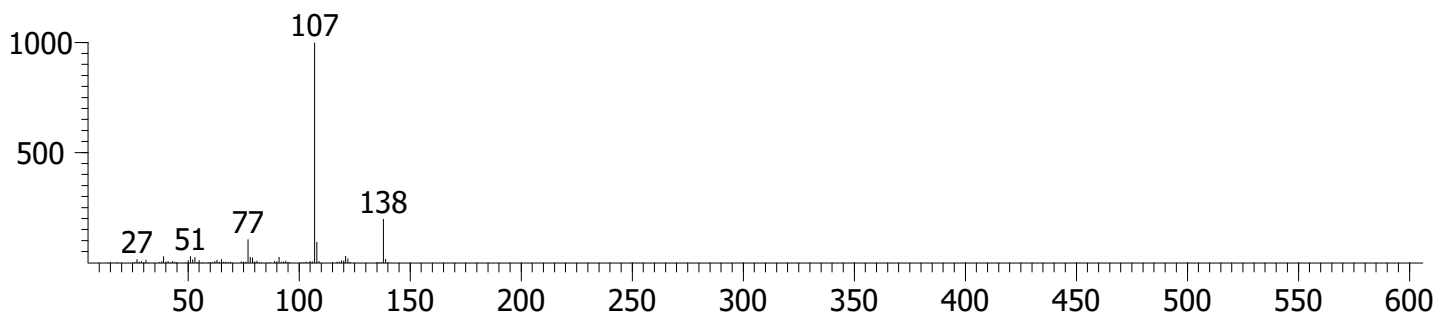

| Hit | Name                                           | Similarity | Probability | CAS        | Library | Formula                                                         | Weight |
|-----|------------------------------------------------|------------|-------------|------------|---------|-----------------------------------------------------------------|--------|
| 1   | Benzeneethanol, 4-hydroxy-                     | 761        | 6025        | 501-94-0   | mainlib | C <sub>8</sub> H <sub>10</sub> O <sub>2</sub>                   | 138    |
| 2   | Hydrazine, 1-(3-hydroxybenzyl)-                | 736        | 1837        | 637-33-2   | mainlib | C <sub>7</sub> H <sub>10</sub> N <sub>2</sub> O                 | 138    |
| 3   | 5-(4-Hydroxy)-benzyl-2-thioxo-imidazolin-4-one | 709        | 540         | 0-00-0     | mainlib | C <sub>10</sub> H <sub>10</sub> N <sub>2</sub> O <sub>2</sub> S | 222    |
| 4   | 3-Amino-4-[4-hydroxyphenyl]butanol             | 684        | 164         | 0-00-0     | mainlib | C <sub>10</sub> H <sub>15</sub> NO <sub>2</sub>                 | 181    |
| 5   | 9-Oxa-bicyclo[3.3.1]nona-3,6-dien-2-one        | 684        | 164         | 75568-53-5 | mainlib | C <sub>8</sub> H <sub>8</sub> O <sub>2</sub>                    | 136    |

### 3H-1,2-Benzodithiol-3-one

1st Dimension R.T. = 1344.01  
2nd Dimension R.T. = 2.449  
Quant Mass(es) = 168  
S/N = 452.90  
Area = 71692  
Height = 7498.3  
Similarity = 876

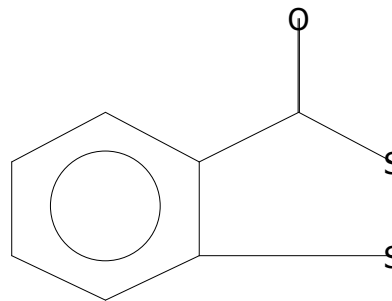

Peak Apex - sample "AnMbr B (20191120):1", peak 3252, at 1344.01 , 2.449 sec , sec (Spec # 131281)

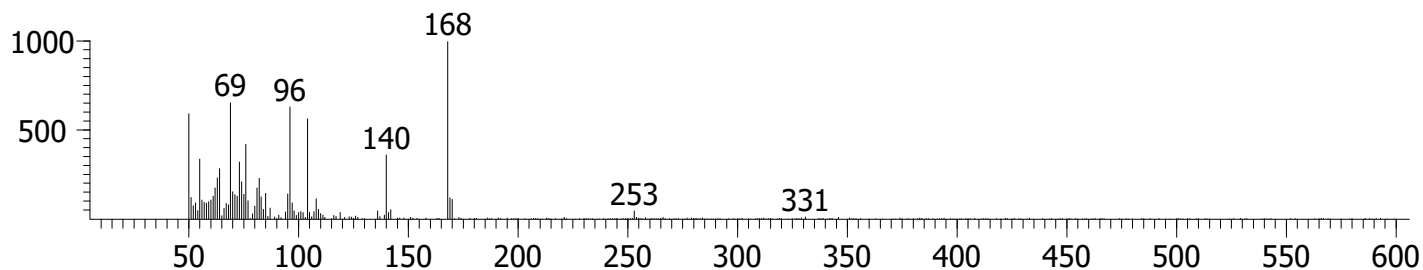

Peak True - sample "AnMbr B (20191120):1", peak 3252, at 1344.01 , 2.449 sec , sec (Spec # 131281)

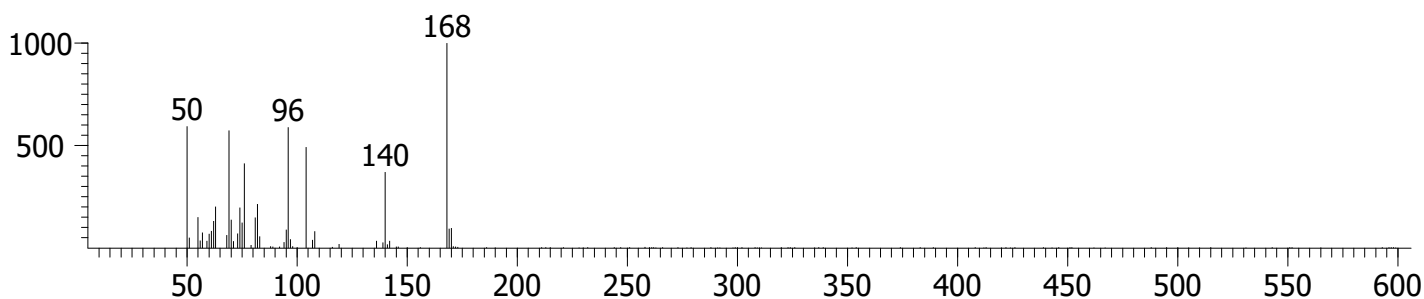

Library Hit - similarity 876, "3H-1,2-Benzodithiol-3-one"

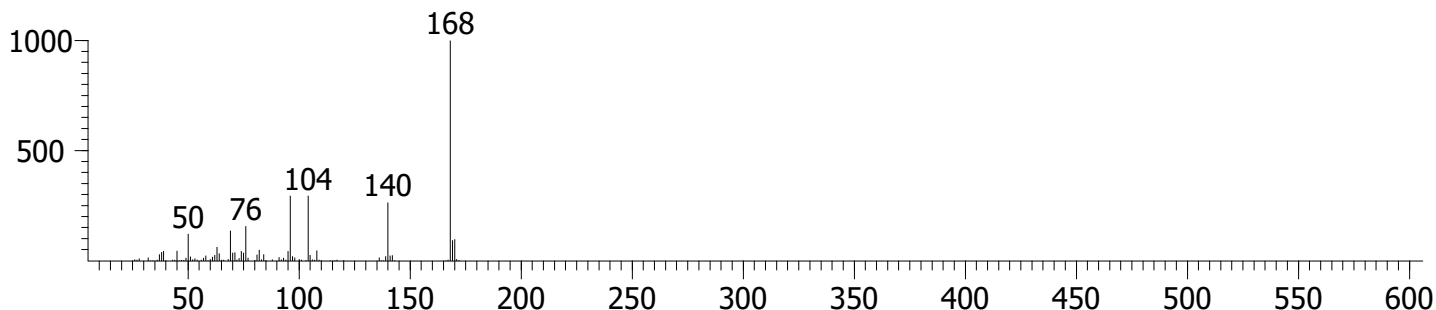

| Hit | Name                                                                                | Similarity | Probability | CAS        | Library | Formula    | Weight |
|-----|-------------------------------------------------------------------------------------|------------|-------------|------------|---------|------------|--------|
| 1   | 3H-1,2-Benzodithiol-3-one                                                           | 876        | 9758        | 1677-27-6  | mainlib | C7H4OS2    | 168    |
| 2   | Quinoline-4-carbonitrile, 2-methyl-                                                 | 606        | 97          | 0-00-0     | mainlib | C11H8N2    | 168    |
| 3   | Propiohydrazide, 3-(2,3,4,5-tetrahydro-3,5-dioxo-1,2,4-triazin-6-yl)-               | 582        | 32          | 68981-62-4 | mainlib | C6H9N5O3   | 199    |
| 4   | 2-Amino-6-fluorobenzothiazole                                                       | 561        | 13          | 348-40-3   | mainlib | C7H5FN2S   | 168    |
| 5   | Furan-2-carboxylic acid, 5-[(4-cyclohexylbenzenesulfonylamino)methyl]-, ethyl ester | 557        | 11          | 0-00-0     | mainlib | C20H25NO5S | 391    |

## Quinoline, 5-methyl-

1st Dimension R.T. = 1351  
2nd Dimension R.T. = 2.343  
Quant Mass(es) = 143  
S/N = 198.74  
Area = 31514  
Height = 3517.0  
Similarity = 707

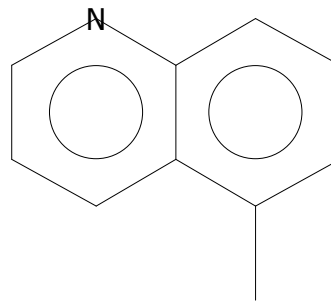

Peak Apex - sample "AnMbr B (20191120):1", peak 3290, at 1351 , 2.343 sec , sec (Spec # 132325)

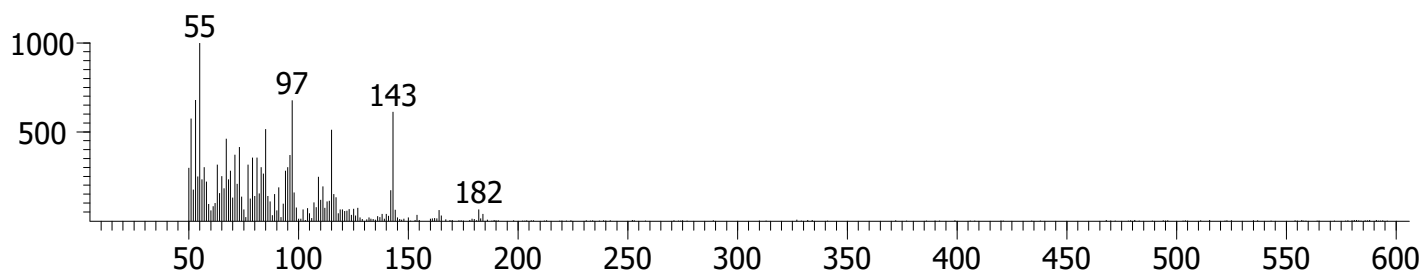

Peak True - sample "AnMbr B (20191120):1", peak 3290, at 1351 , 2.343 sec , sec (Spec # 132325)

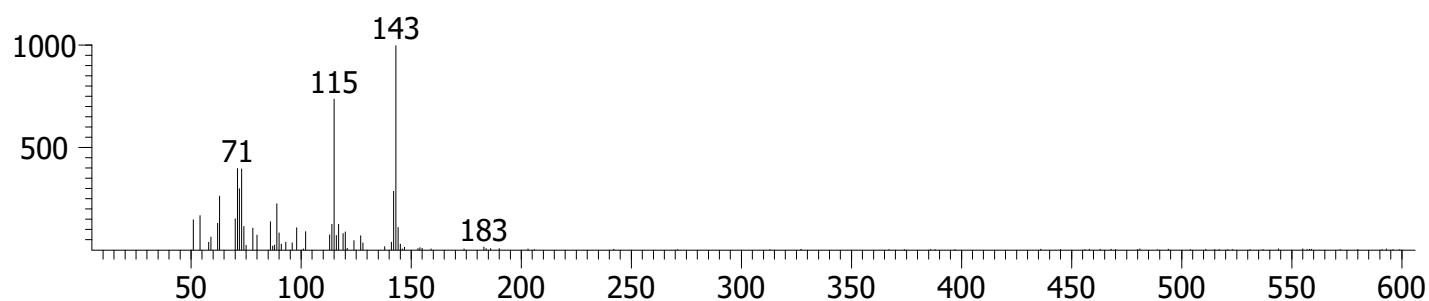

Library Hit - similarity 707, "Quinoline, 5-methyl-"

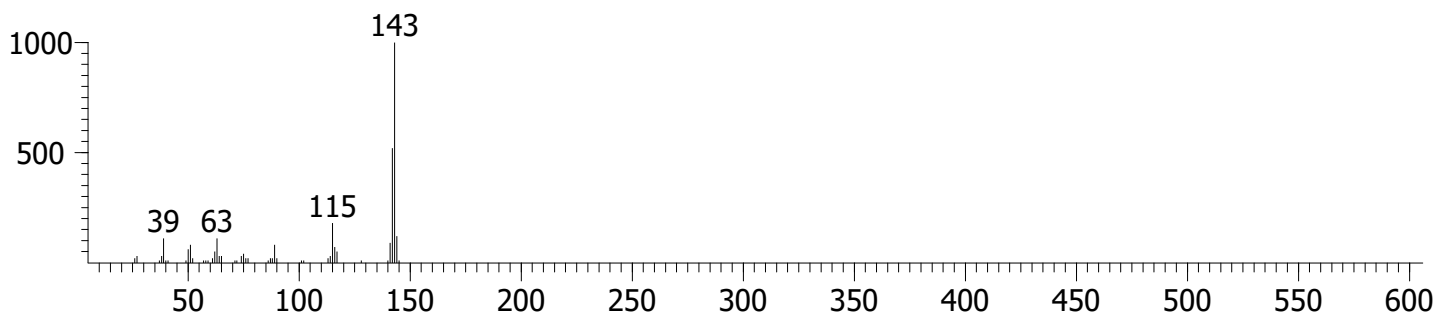

| Hit | Name                  | Similarity | Probability | CAS       | Library | Formula | Weight |
|-----|-----------------------|------------|-------------|-----------|---------|---------|--------|
| 1   | Quinoline, 5-methyl-  | 707        | 1784        | 7661-55-4 | mainlib | C10H9N  | 143    |
| 2   | Quinoline, 3-methyl-  | 703        | 1507        | 612-58-8  | mainlib | C10H9N  | 143    |
| 3   | 1H-Pyrrole, 2-phenyl- | 696        | 1154        | 3042-22-6 | mainlib | C10H9N  | 143    |
| 4   | Quinoline, 7-methyl-  | 685        | 792         | 612-60-2  | mainlib | C10H9N  | 143    |
| 5   | Quinoline, 6-methyl-  | 679        | 622         | 91-62-3   | mainlib | C10H9N  | 143    |

## Hexathiepane

1st Dimension R.T. = 1543.39  
2nd Dimension R.T. = 2.937  
Quant Mass(es) = 142  
S/N = 460.18  
Area = 73597  
Height = 6718.7  
Similarity = 758

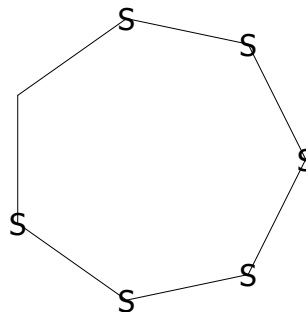

Peak Apex - sample "AnMbr B (20191120):1", peak 4214, at 1543.39 , 2.937 sec , sec (Spec # 161565)

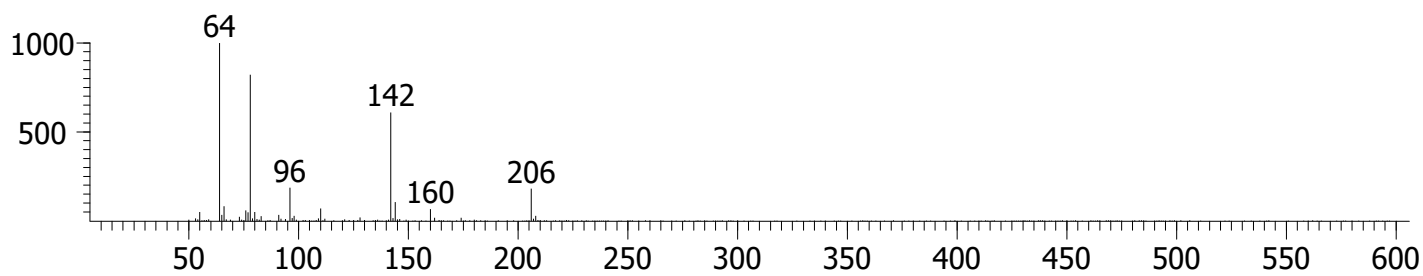

Peak True - sample "AnMbr B (20191120):1", peak 4214, at 1543.39 , 2.937 sec , sec (Spec # 161565)

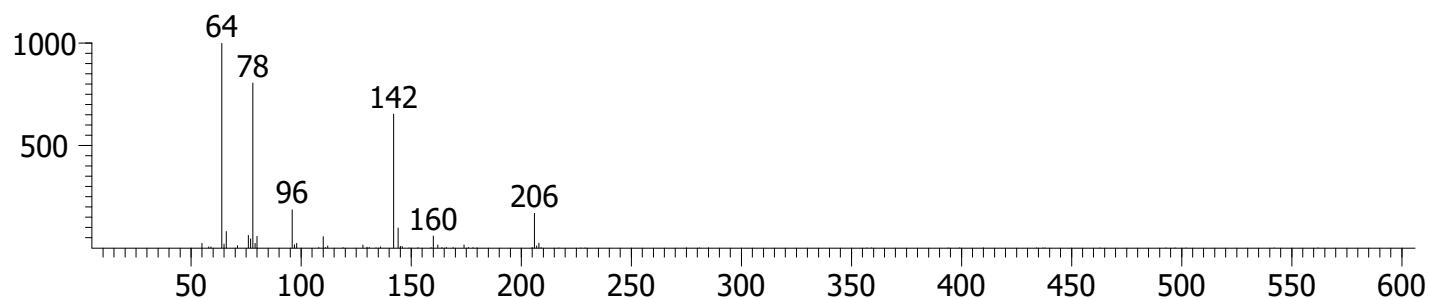

Library Hit - similarity 758, "Hexathiepane"

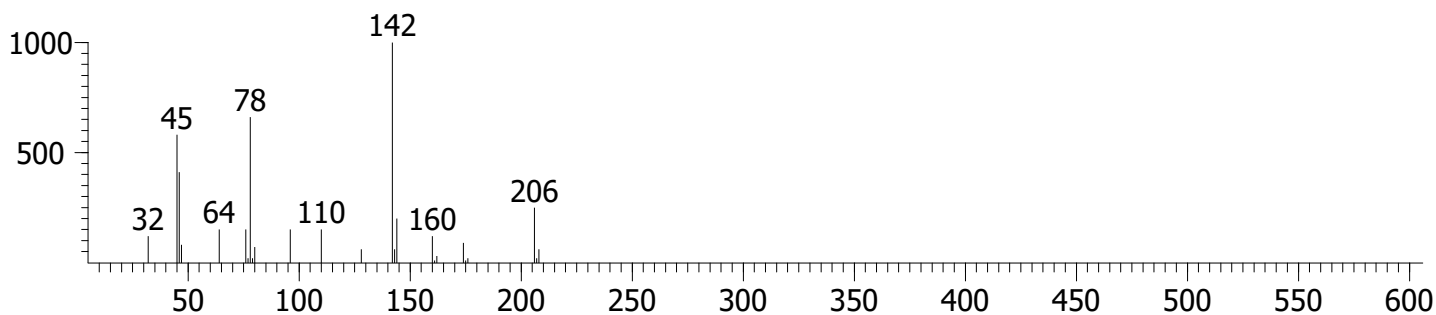

| Hit | Name                        | Similarity | Probability | CAS        | Library | Formula                                                         | Weight |
|-----|-----------------------------|------------|-------------|------------|---------|-----------------------------------------------------------------|--------|
| 1   | Hexathiepane                | 758        | 9855        | 17233-71-5 | mainlib | CH <sub>2</sub> S <sub>6</sub>                                  | 206    |
| 2   | Lenthionine                 | 544        | 98          | 292-46-6   | mainlib | C <sub>2</sub> H <sub>4</sub> S <sub>5</sub>                    | 188    |
| 3   | 3,3-Dimercaptoquinuclidine  | 491        | 19          | 4029-14-5  | mainlib | C <sub>7</sub> H <sub>13</sub> NS <sub>2</sub>                  | 175    |
| 4   | Calconcarboxylic acid       | 456        | 4           | 3737-95-9  | mainlib | C <sub>21</sub> H <sub>14</sub> N <sub>2</sub> O <sub>7</sub> S | 438    |
| 5   | Cyclohexane-d <sub>12</sub> | 450        | 3           | 1735-17-7  | mainlib | C <sub>6</sub> D <sub>12</sub>                                  | 96     |



## 1,7-Dimethylxanthine

1st Dimension R.T. = 1704.3  
2nd Dimension R.T. = 2.779  
Quant Mass(es) = 68  
S/N = 73.461  
Area = 34751  
Height = 3117.6  
Similarity = 818

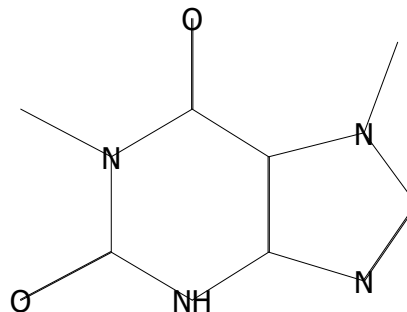

Peak Apex - sample "AnMbr B (20191120):1", peak 4978, at 1704.3 , 2.779 sec , sec (Spec # 185921)

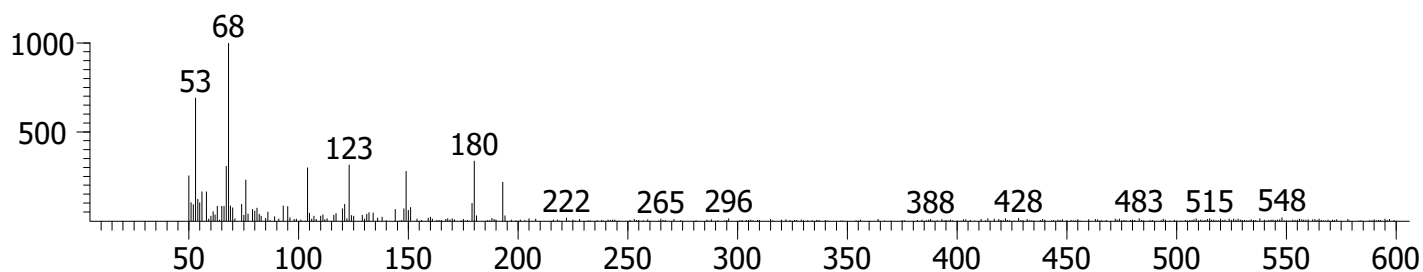

Peak True - sample "AnMbr B (20191120):1", peak 4978, at 1704.3 , 2.779 sec , sec (Spec # 185921)

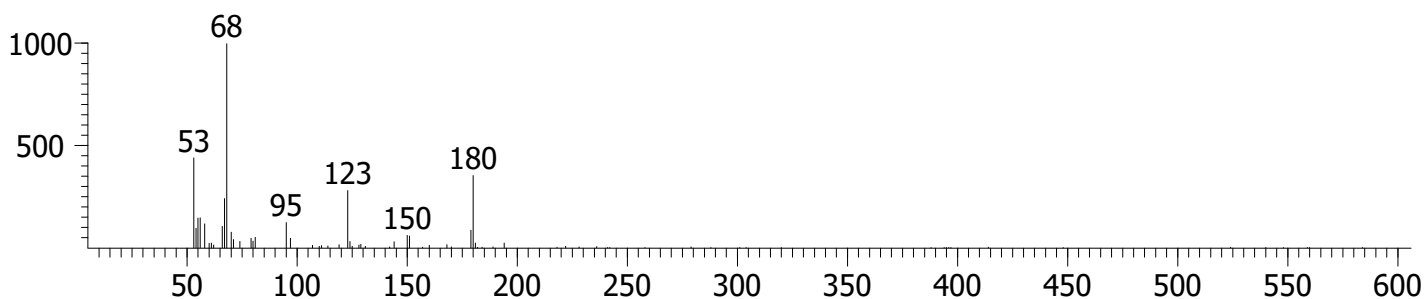

Library Hit - similarity 818, "1,7-Dimethylxanthine"

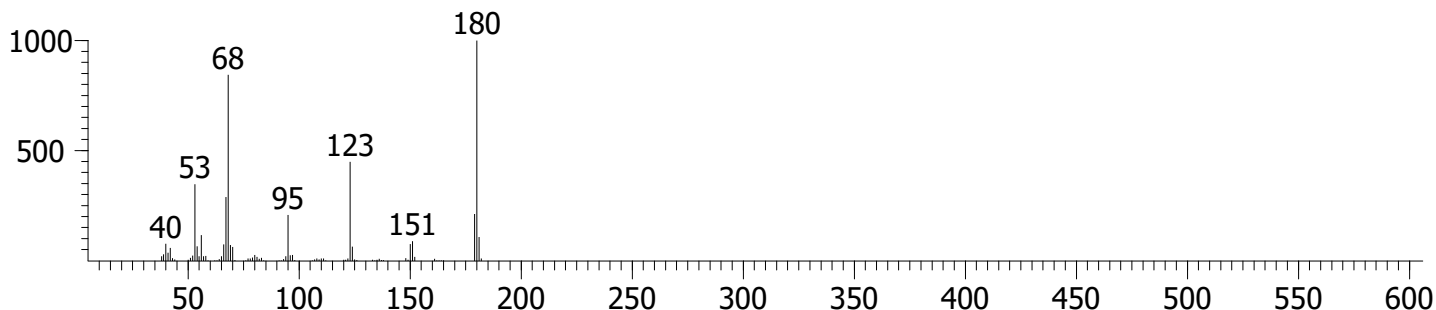

| Hit | Name                                                                                   | Similarity | Probability | CAS      | Library | Formula    | Weight |
|-----|----------------------------------------------------------------------------------------|------------|-------------|----------|---------|------------|--------|
| 1   | 1,7-Dimethylxanthine                                                                   | 818        | 8189        | 611-59-6 | mainlib | C7H8N4O2   | 180    |
| 2   | 3-Acetyl-1,7-dimethyl-purine-2,6-dione                                                 | 757        | 1426        | 0-00-0   | mainlib | C9H10N4O3  | 222    |
| 3   | Theophylline                                                                           | 707        | 290         | 58-55-9  | mainlib | C7H8N4O2   | 180    |
| 4   | 7H-Purine-2,6(1H,3H)-dione, 1,3-dimethyl-7-(4-methyl-1,2,5-oxadiazol-3-ylaminomethyl)- | 592        | 17          | 0-00-0   | mainlib | C11H13N7O3 | 291    |
| 5   | 7-Acetyl-1,3-dimethyl-1H-purine-2,6(3H,7H)-dione                                       | 591        | 16          | 0-00-0   | mainlib | C9H10N4O3  | 222    |

## 2,4(1H,3H)-Quinazolinedione

1st Dimension R.T. = 1728.79  
2nd Dimension R.T. = 2.785  
Quant Mass(es) = 162  
S/N = 115.00  
Area = 10754  
Height = 954.03  
Similarity = 696

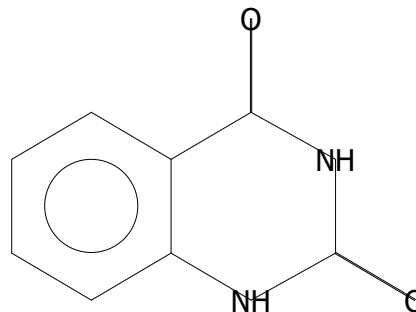

Peak Apex - sample "AnMbr B (20191120):1", peak 5088, at 1728.79 , 2.785 sec , sec (Spec # 189632)

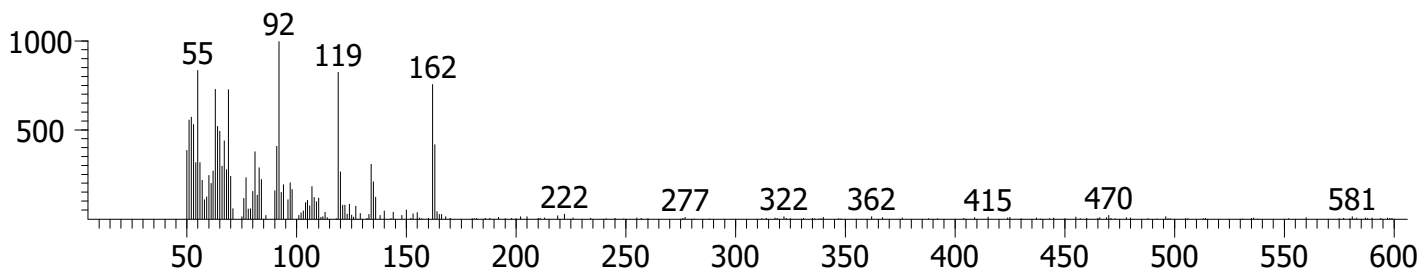

Peak True - sample "AnMbr B (20191120):1", peak 5088, at 1728.79 , 2.785 sec , sec (Spec # 189632)

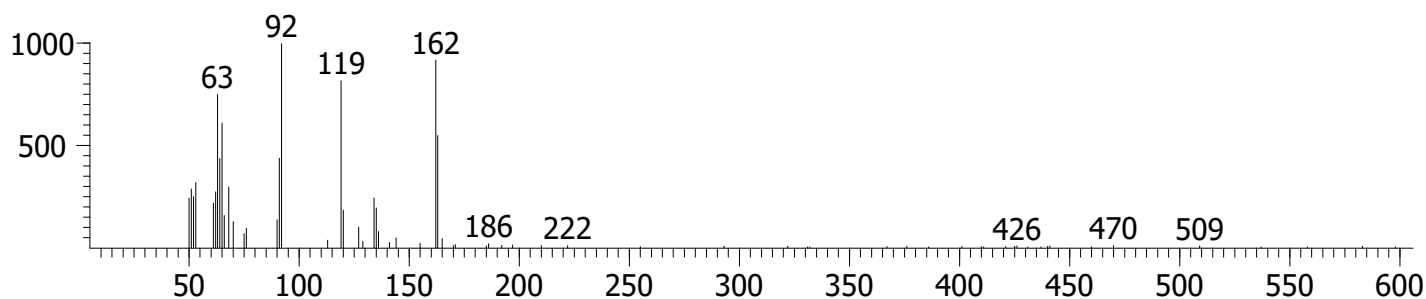

Library Hit - similarity 696, "2,4(1H,3H)-Quinazolinedione"

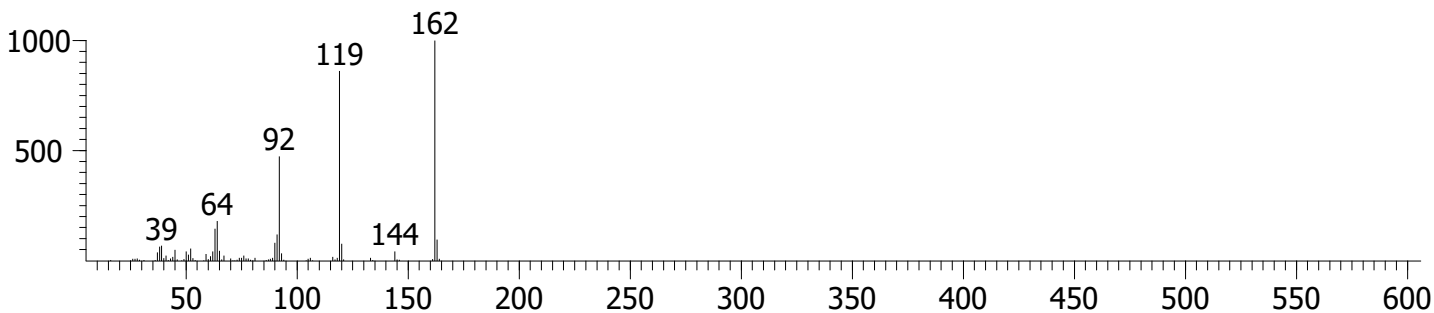

| Hit | Name                                                       | Similarity | Probability | CAS        | Library | Formula    | Weight |
|-----|------------------------------------------------------------|------------|-------------|------------|---------|------------|--------|
| 1   | 2,4(1H,3H)-Quinazolinedione                                | 696        | 3387        | 86-96-4    | mainlib | C8H6N2O2   | 162    |
| 2   | Urea, 1-(3-methylbenzoyl)-3-(2,4,6-trimethylpyridin-3-yl)- | 687        | 2459        | 0-00-0     | mainlib | C17H19N3O2 | 297    |
| 3   | Pyrimidino[2,3-c]pyrrole-5,7(6H)-dione, 2-methyl-          | 662        | 749         | 53636-28-5 | mainlib | C8H6N2O2   | 162    |
| 4   | Isatoic anhydride                                          | 644        | 386         | 118-48-9   | mainlib | C8H5NO3    | 163    |
| 5   | 4-Methylquinolinimide                                      | 637        | 296         | 53636-26-3 | mainlib | C8H6N2O2   | 162    |

1H-Tetrazole,  
5-(1,5-dimethyl-1H-pyrrol-2-yl)-

1st Dimension R.T. = 1735.78  
 2nd Dimension R.T. = 2.732  
 Quant Mass(es) = 163  
 S/N = 229.17  
 Area = 67736  
 Height = 6065.6  
 Similarity = 735

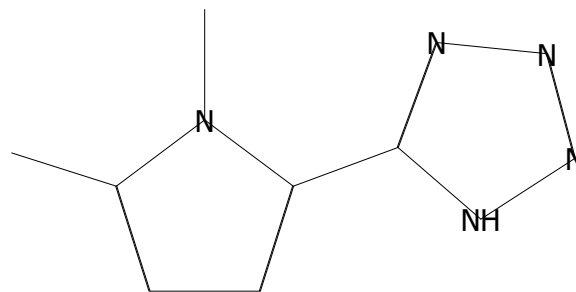

Peak Apex - sample "AnMbr B (20191120):1", peak 5117, at 1735.78 , 2.732 sec , sec (Spec # 190684)

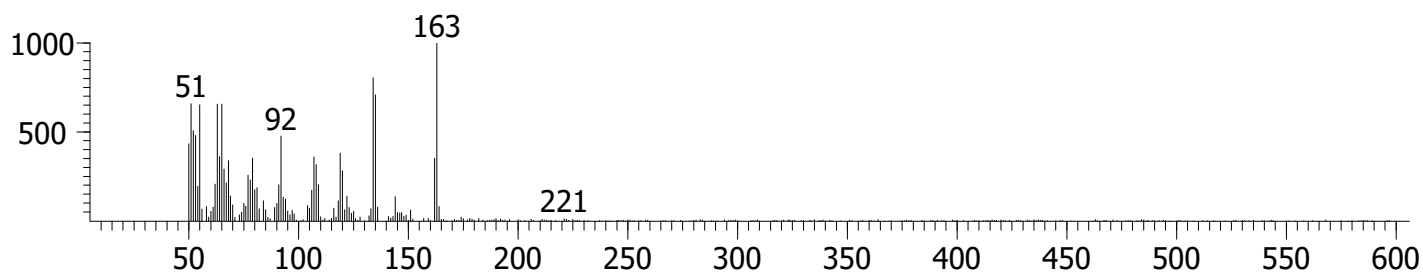

Peak True - sample "AnMbr B (20191120):1", peak 5117, at 1735.78 , 2.732 sec , sec (Spec # 190684)

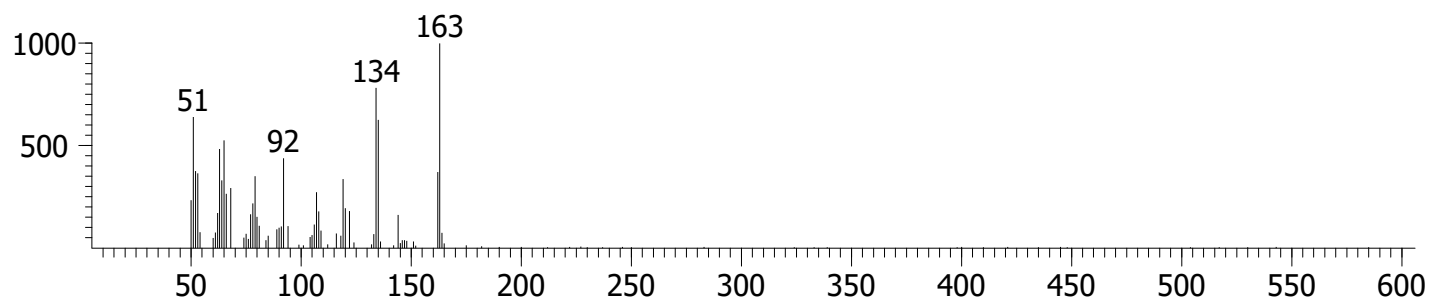

Library Hit - similarity 735, "1H-Tetrazole, 5-(1,5-dimethyl-1H-pyrrol-2-yl)-"

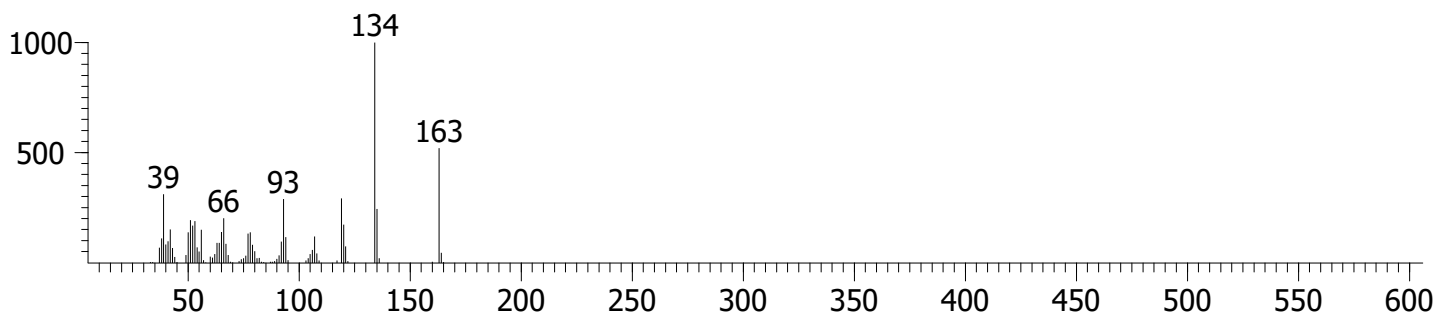

| Hit | Name                                                          | Similarity | Probability | CAS        | Library | Formula  | Weight |
|-----|---------------------------------------------------------------|------------|-------------|------------|---------|----------|--------|
| 1   | 1H-Tetrazole, 5-(1,5-dimethyl-1H-pyrrol-2-yl)-                | 735        | 3658        | 0-00-0     | mainlib | C7H9N5   | 163    |
| 2   | 1-Amino-4,6-dimethyl-2-oxo-1,2-dihydropyridine-3-carbonitrile | 683        | 730         | 1562-12-5  | mainlib | C8H9N3O  | 163    |
| 3   | Phenol, 2-amino-4-(2-methyl-2H-1,2,3,4-tetrazol-5-yl)-        | 676        | 559         | 0-00-0     | mainlib | C8H9N5O  | 191    |
| 4   | (Chroman-7-yl)methylamine                                     | 667        | 406         | 0-00-0     | mainlib | C10H13NO | 163    |
| 5   | Isoquinoline, 1,2,3,4-tetrahydro-6-methoxy-                   | 664        | 358         | 42923-77-3 | mainlib | C10H13NO | 163    |

## Cyclic octaatomic sulfur

1st Dimension R.T. = 1872.2  
2nd Dimension R.T. = 3.175  
Quant Mass(es) = 64  
S/N = 969.39  
Area = 593078  
Height = 45705  
Similarity = 726

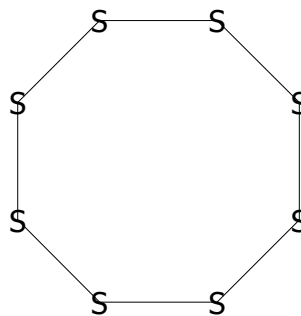

Peak Apex - sample "AnMbr B (20191120):1", peak 5556, at 1872.2 , 3.175 sec , sec (Spec # 211421)

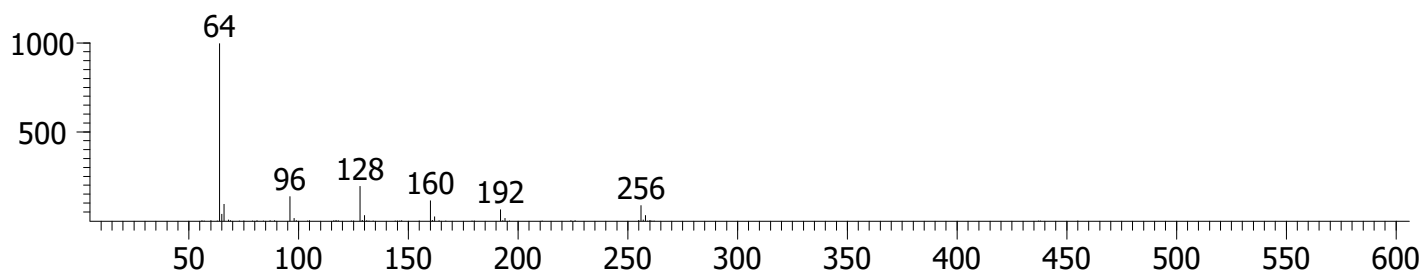

Peak True - sample "AnMbr B (20191120):1", peak 5556, at 1872.2 , 3.175 sec , sec (Spec # 211421)

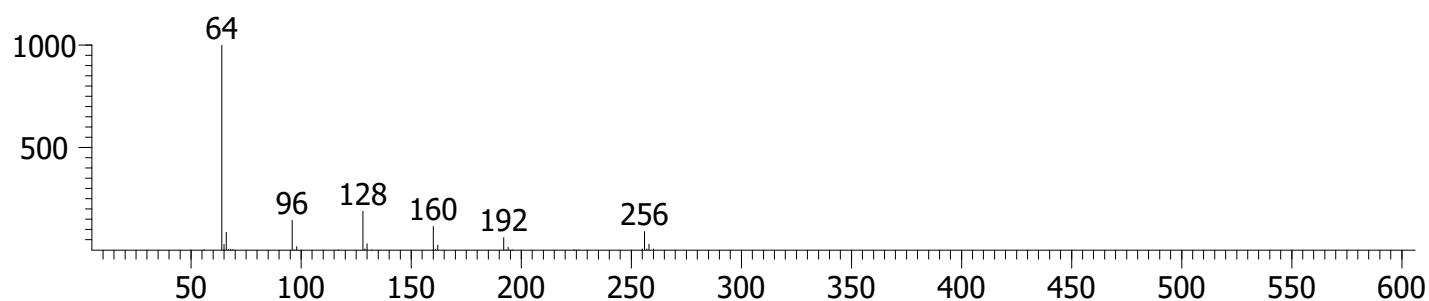

Library Hit - similarity 726, "Cyclic octaatomic sulfur"

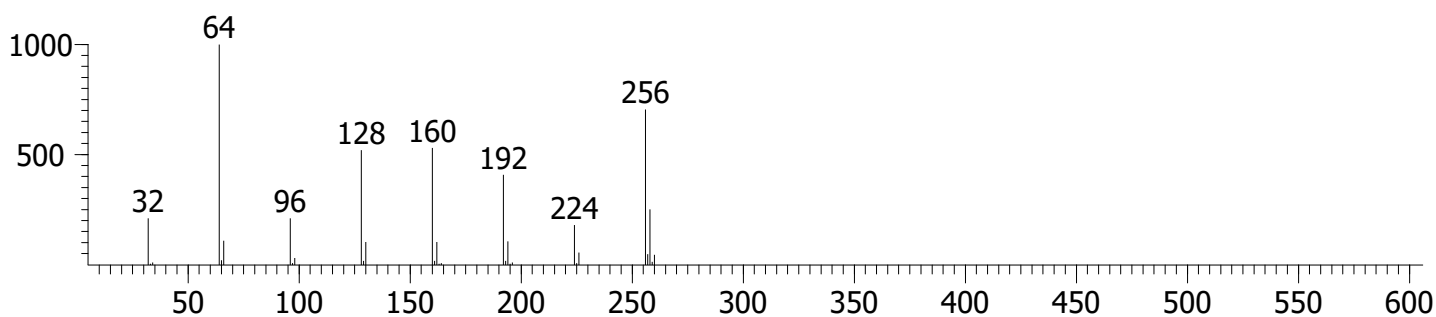

| Hit | Name                                                               | Similarity | Probability | CAS         | Library | Formula      | Weight |
|-----|--------------------------------------------------------------------|------------|-------------|-------------|---------|--------------|--------|
| 1   | Cyclic octaatomic sulfur                                           | 726        | 9427        | 10544-50-0  | mainlib | S8           | 256    |
| 2   | Dibenzo[cd,g]indazole-3-sulfonic acid, 2,6-dihydro-6-oxo-          | 546        | 169         | 293765-87-4 | mainlib | C14H8N2O4S   | 300    |
| 3   | Hexathiane                                                         | 546        | 169         | 13798-23-7  | mainlib | S6           | 192    |
| 4   | Methanethiol, N-(p-methoxyphenethyl)amidino-, hydrogen thiosulfate | 537        | 123         | 40283-94-1  | mainlib | C11H16N2O4S2 | 304    |
| 5   | Dipentamethylenethiuram hexasulfide                                | 473        | 20          | 971-15-3    | mainlib | C12H20N2S6   | 384    |

1,4-Benzenediamine,  
N-(1-methylethyl)-N'-phenyl-

1st Dimension R.T. = 1903.69

2nd Dimension R.T. = 2.317

Quant Mass(es) = 211

S/N = 720.17

Area = 72790

Height = 6659.1

Similarity = 772

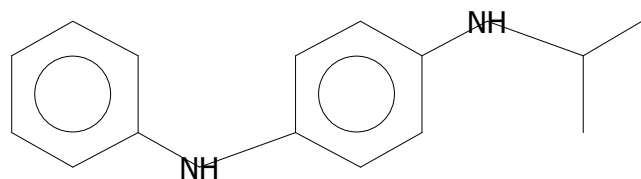

Peak Apex - sample "AnMbr B (20191120):1", peak 5618, at 1903.69 , 2.317 sec , sec (Spec # 216061)

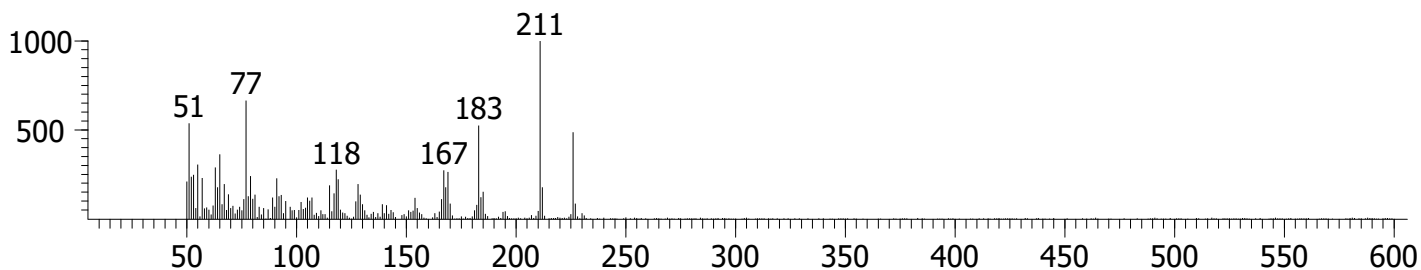

Peak True - sample "AnMbr B (20191120):1", peak 5618, at 1903.69 , 2.317 sec , sec (Spec # 216061)

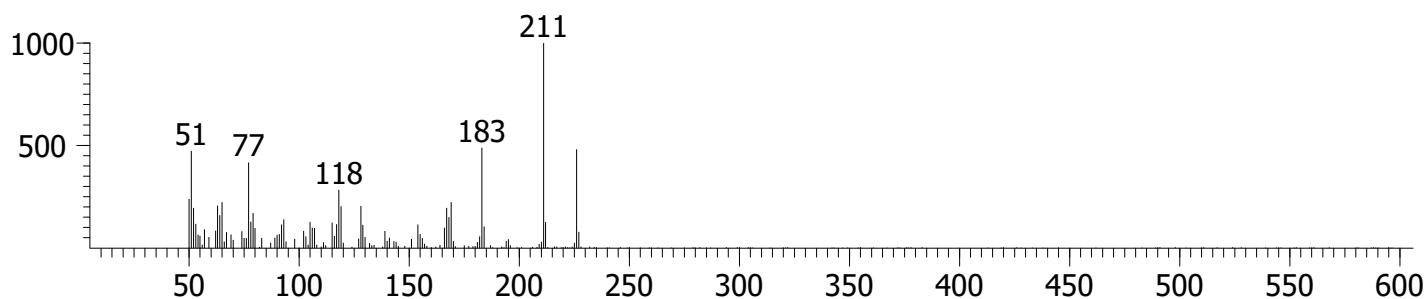

Library Hit - similarity 772, "1,4-Benzenediamine, N-(1-methylethyl)-N'-phenyl-"

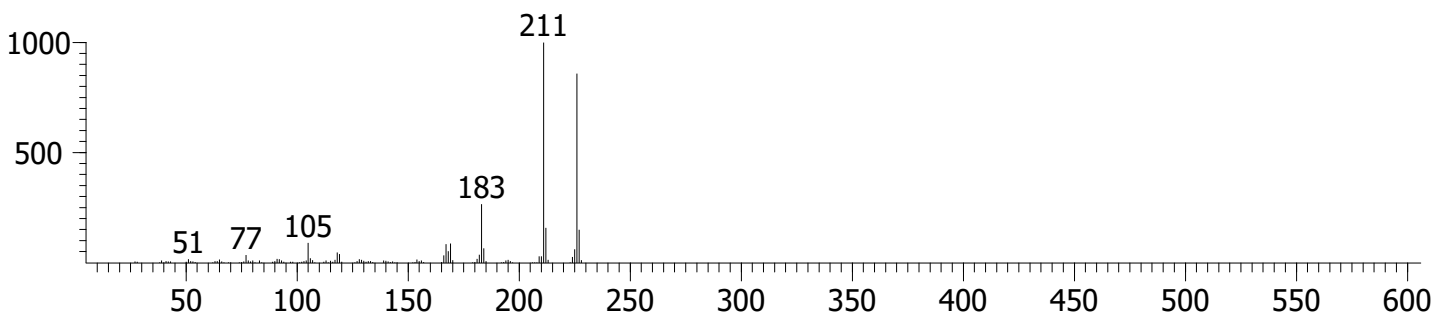

| Hit | Name                                                                                | Similarity | Probability | CAS         | Library | Formula   | Weight |
|-----|-------------------------------------------------------------------------------------|------------|-------------|-------------|---------|-----------|--------|
| 1   | 1,4-Benzenediamine, N-(1-methylethyl)-N'-phenyl-                                    | 772        | 5922        | 101-72-4    | mainlib | C15H18N2  | 226    |
| 2   | 3,8-Dimethyl-2,8-diazatricyclo[8.4.0.0(2,6)]tetradeca-1(10),3,5,11,13-pentaen-9-one | 699        | 806         | 0-00-0      | mainlib | C14H14N2O | 226    |
| 3   | Benzene, 1-(1,1-dimethylethyl)-4-phenoxy-                                           | 682        | 440         | 5331-28-2   | mainlib | C16H18O   | 226    |
| 4   | Beta-carboline, 6-methoxy-1,2-dimethyl-                                             | 674        | 328         | 154505-42-7 | mainlib | C14H14N2O | 226    |
| 5   | 1,1'-Biphenyl, 3-(1,1-dimethylethoxy)-                                              | 673        | 315         | 55059-21-7  | mainlib | C16H18O   | 226    |

## Phthalazin-1(2H)-one, 2-ethenyl-

1st Dimension R.T. = 1956.16  
2nd Dimension R.T. = 3.188  
Quant Mass(es) = 171  
S/N = 57.641  
Area = 18697  
Height = 1314.8  
Similarity = 682

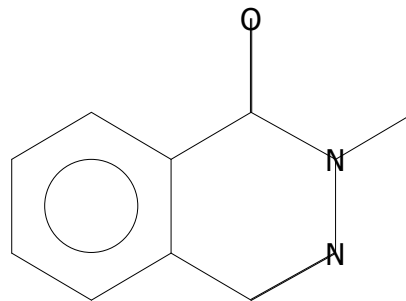

Peak Apex - sample "AnMbr B (20191120):1", peak 5738, at 1956.16 , 3.188 sec , sec (Spec # 224143)

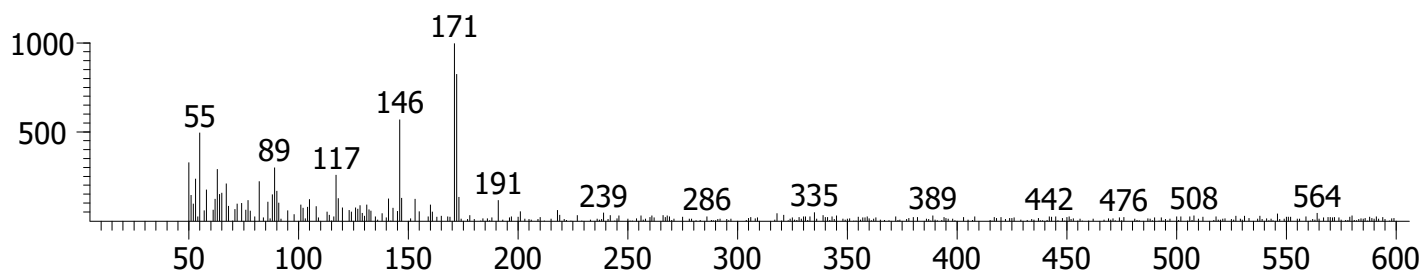

Peak True - sample "AnMbr B (20191120):1", peak 5738, at 1956.16 , 3.188 sec , sec (Spec # 224143)

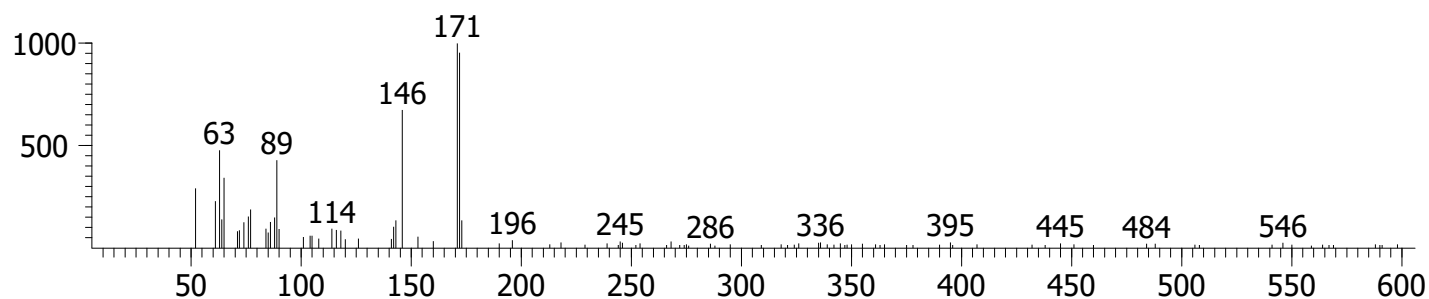

Library Hit - similarity 682, "Phthalazin-1(2H)-one, 2-ethenyl-"

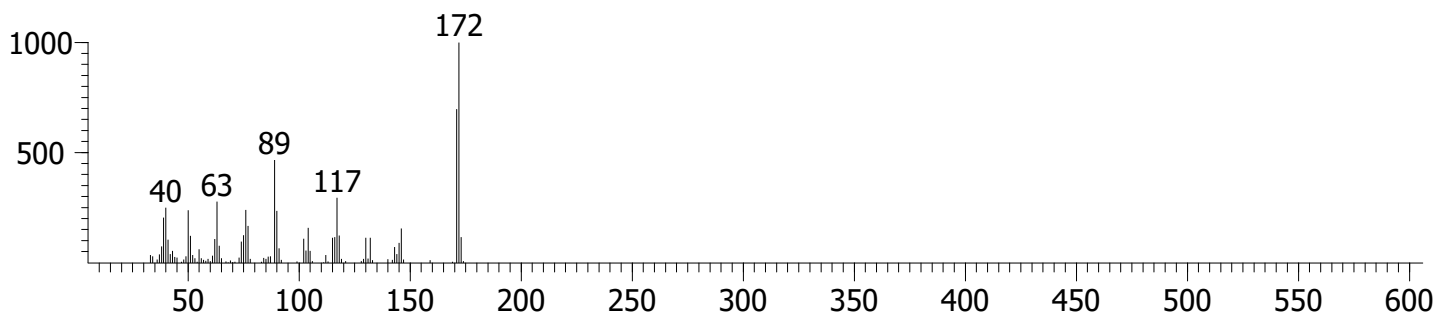

| Hit | Name                                                             | Similarity | Probability | CAS        | Library | Formula  | Weight |
|-----|------------------------------------------------------------------|------------|-------------|------------|---------|----------|--------|
| 1   | Phthalazin-1(2H)-one, 2-ethenyl-                                 | 682        | 2137        | 0-00-0     | mainlib | C10H8N2O | 172    |
| 2   | 4-Hydroxy-1-naphthaldehyde                                       | 670        | 1423        | 7770-45-8  | mainlib | C11H8O2  | 172    |
| 3   | 3-Phenyl-1H-pyrazole-4-carbaldehyde                              | 663        | 1090        | 26033-20-5 | mainlib | C10H8N2O | 172    |
| 4   | 1,3-Diazatricyclo[6.3.1.0(4,12)]dodeca-4,6,8(12),9-tetraen-2-one | 659        | 921         | 83848-83-3 | mainlib | C10H8N2O | 172    |
| 5   | Imidazole, 1,4-dimethyl-2-phenyl-                                | 654        | 742         | 0-00-0     | mainlib | C11H12N2 | 172    |

# 1-(2-Thienyl)-1-propanone

1st Dimension R.T. = 854.286  
2nd Dimension R.T. = 1.921  
Quant Mass(es) = 111  
S/N = 471.09  
Area = 82507  
Height = 10175  
Similarity = 815

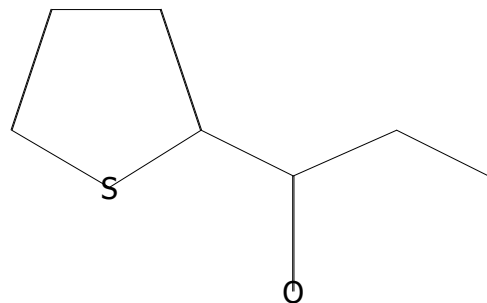

Peak Apex - sample "AnBxr B (20191121):1", peak 1263, at 854.286 , 1.921 sec , sec (Spec # 57001)

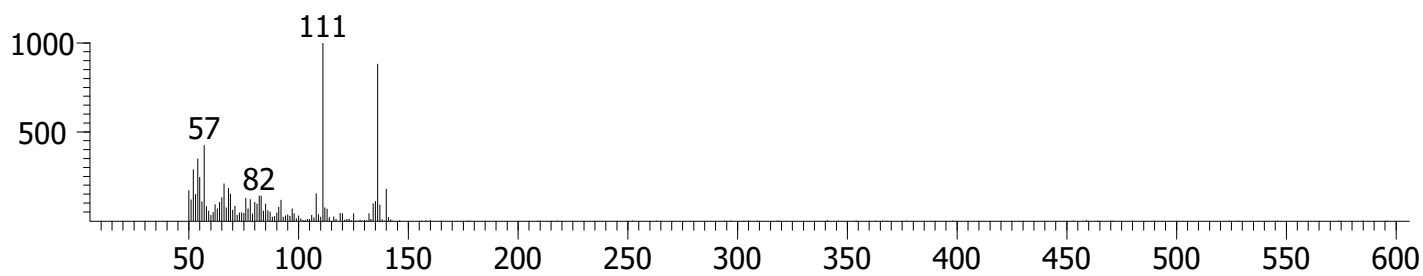

Peak True - sample "AnBxr B (20191121):1", peak 1263, at 854.286 , 1.921 sec , sec (Spec # 57001)

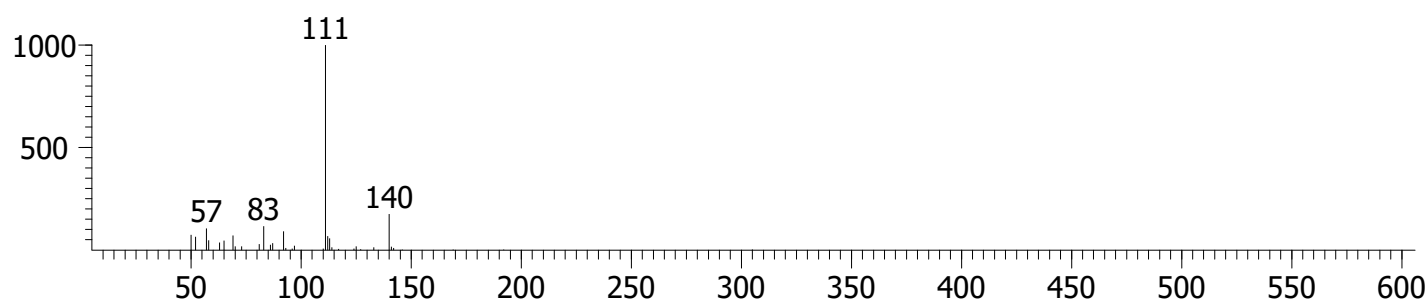

Library Hit - similarity 815, "1-(2-Thienyl)-1-propanone"

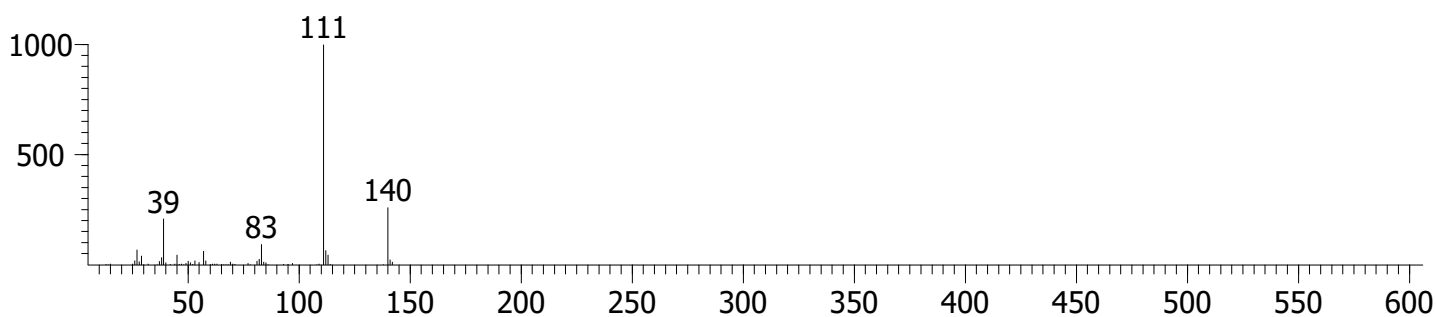

| Hit | Name                                          | Similarity | Probability | CAS        | Library | Formula  | Weight |
|-----|-----------------------------------------------|------------|-------------|------------|---------|----------|--------|
| 1   | 1-(2-Thienyl)-1-propanone                     | 815        | 3655        | 13679-75-9 | mainlib | C7H8OS   | 140    |
| 2   | 1-(2-Thienyl)-1-propanone                     | 814        | 8267        | 13679-75-9 | replib  | C7H8OS   | 140    |
| 3   | 1-(2-Thienyl)-1-propanone                     | 813        | 8267        | 13679-75-9 | replib  | C7H8OS   | 140    |
| 4   | Glycine, N-(2-thienylcarbonyl)-, methyl ester | 810        | 2946        | 0-00-0     | mainlib | C8H9NO3S | 199    |
| 5   | Thiophene, 2-methyl-5-propyl-                 | 778        | 787         | 33933-73-2 | mainlib | C8H12S   | 140    |

# Phenol, 3-chloro-

1st Dimension R.T. = 878.772  
2nd Dimension R.T. = 1.782  
Quant Mass(es) = 128  
S/N = 926.37  
Area = 328939  
Height = 39073  
Similarity = 784

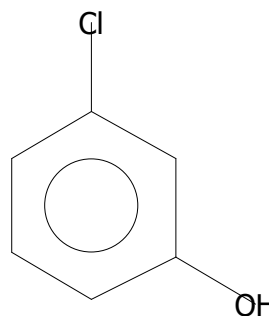

Peak Apex - sample "AnBxr B (20191121):1", peak 1368, at 878.772 , 1.782 sec , sec (Spec # 60690)

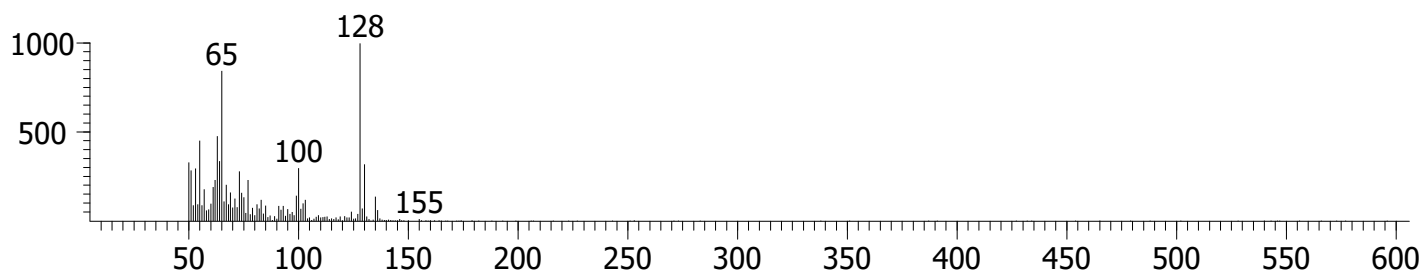

Peak True - sample "AnBxr B (20191121):1", peak 1368, at 878.772 , 1.782 sec , sec (Spec # 60690)

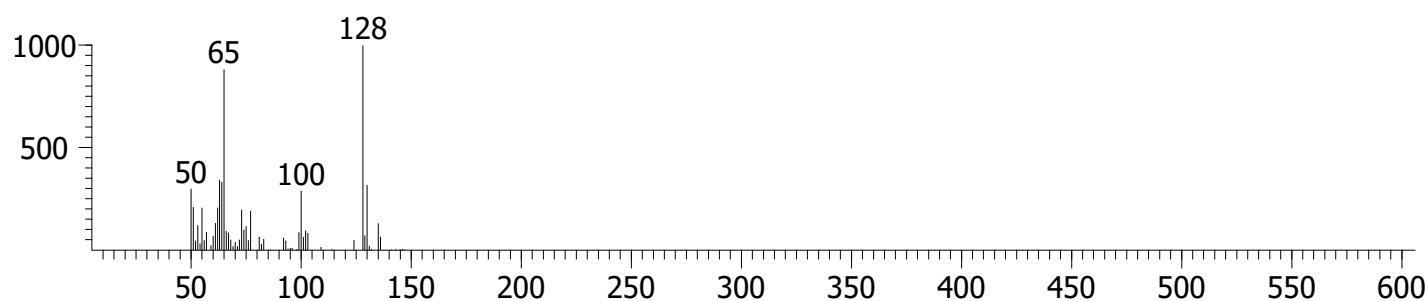

Library Hit - similarity 784, "Phenol, 3-chloro-"

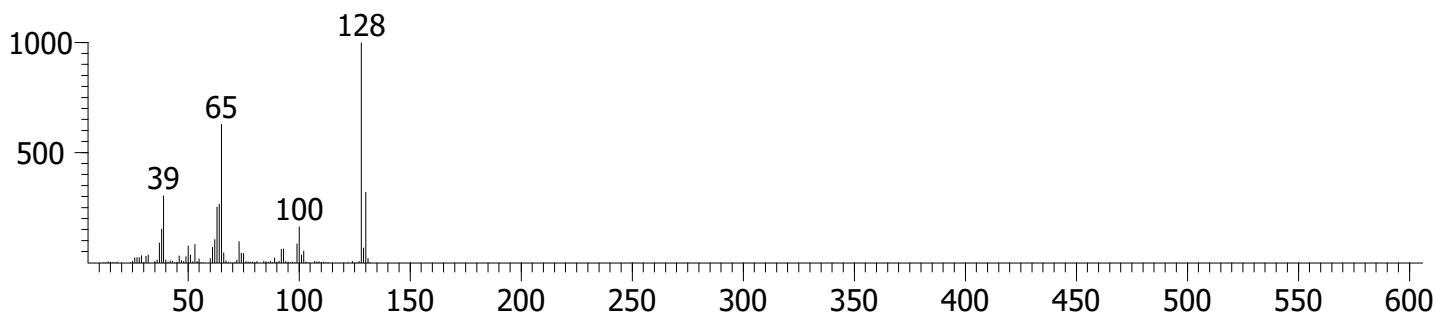

| Hit | Name              | Similarity | Probability | CAS      | Library | Formula | Weight |
|-----|-------------------|------------|-------------|----------|---------|---------|--------|
| 1   | Phenol, 3-chloro- | 784        | 4610        | 108-43-0 | replib  | C6H5ClO | 128    |
| 2   | Phenol, 3-chloro- | 781        | 4610        | 108-43-0 | replib  | C6H5ClO | 128    |
| 3   | Phenol, 4-chloro- | 781        | 4073        | 106-48-9 | replib  | C6H5ClO | 128    |
| 4   | Phenol, 4-chloro- | 773        | 4073        | 106-48-9 | replib  | C6H5ClO | 128    |
| 5   | Phenol, 4-chloro- | 770        | 2901        | 106-48-9 | mainlib | C6H5ClO | 128    |



# Phenol, 4-ethyl-2-methyl-

1st Dimension R.T. = 924.246  
2nd Dimension R.T. = 1.749  
Quant Mass(es) = 121  
S/N = 617.25  
Area = 114052  
Height = 16397  
Similarity = 913

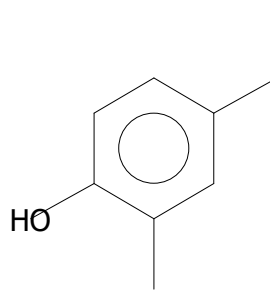

Peak Apex - sample "AnBxr B (20191121):1", peak 1627, at 924.246 , 1.749 sec , sec (Spec # 67575)

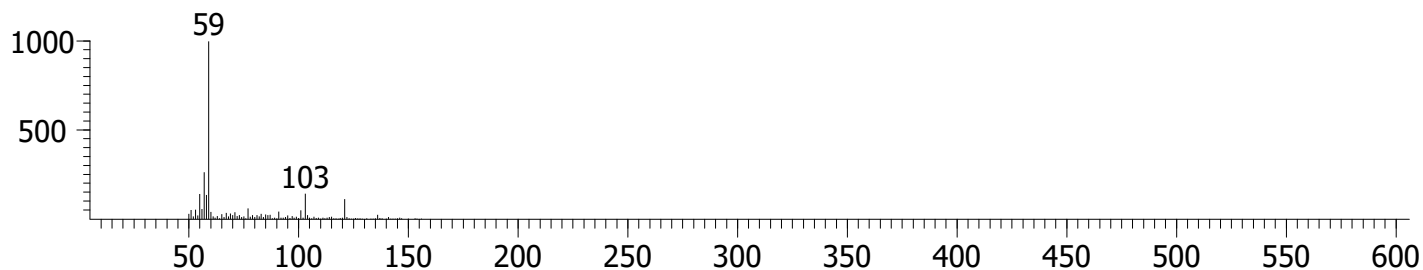

Peak True - sample "AnBxr B (20191121):1", peak 1627, at 924.246 , 1.749 sec , sec (Spec # 67575)

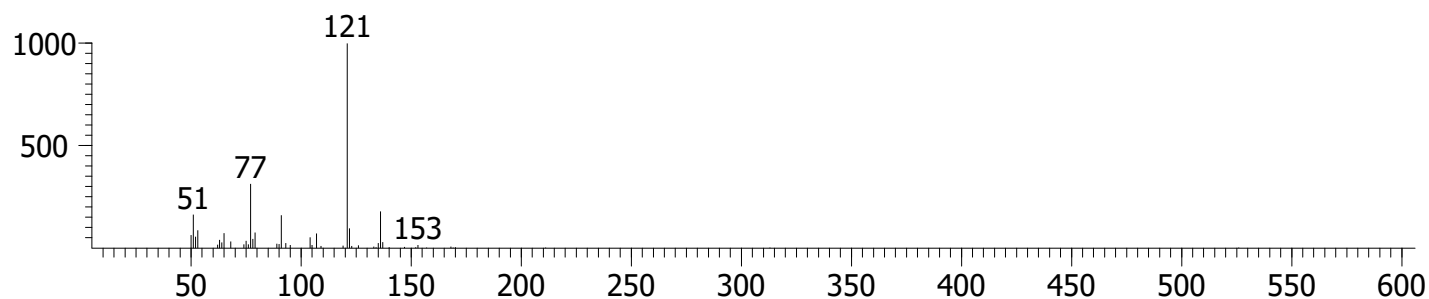

Library Hit - similarity 913, "Phenol, 4-ethyl-2-methyl-"

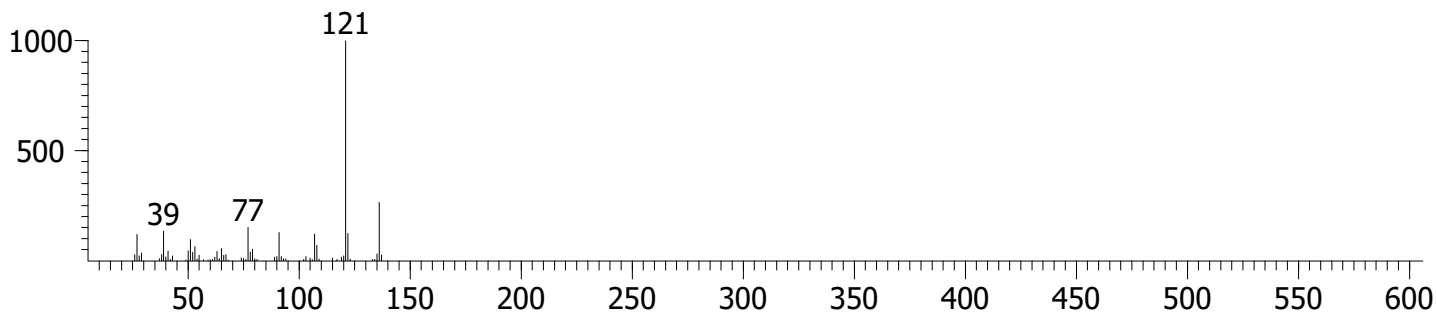

| Hit | Name                      | Similarity | Probability | CAS       | Library | Formula | Weight |
|-----|---------------------------|------------|-------------|-----------|---------|---------|--------|
| 1   | Phenol, 4-ethyl-2-methyl- | 913        | 3522        | 2219-73-0 | mainlib | C9H12O  | 136    |
| 2   | Phenol, 4-ethyl-3-methyl- | 897        | 2028        | 1123-94-0 | mainlib | C9H12O  | 136    |
| 3   | Phenol, 2-ethyl-6-methyl- | 894        | 1792        | 1687-64-5 | mainlib | C9H12O  | 136    |
| 4   | Phenol, 2-ethyl-5-methyl- | 877        | 978         | 1687-61-2 | mainlib | C9H12O  | 136    |
| 5   | Phenol, 3-ethyl-5-methyl- | 865        | 3969        | 698-71-5  | replib  | C9H12O  | 136    |

# 1,3-Cyclopentanedione, 4-methyl-

1st Dimension R.T. = 1169.11  
2nd Dimension R.T. = 2.363  
Quant Mass(es) = 84  
S/N = 478.91  
Area = 194019  
Height = 19059  
Similarity = 783

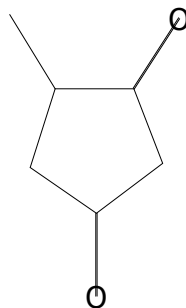

Peak Apex - sample "AnBxr B (20191121):1", peak 3015, at 1169.11 , 2.363 sec , sec (Spec # 104768)

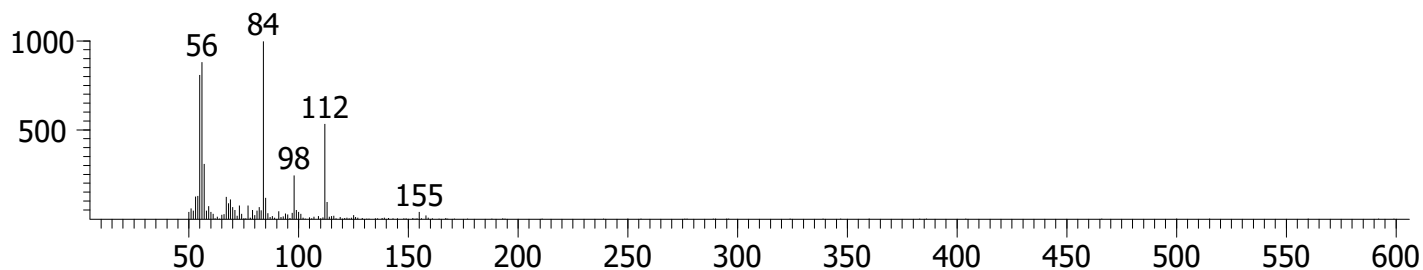

Peak True - sample "AnBxr B (20191121):1", peak 3015, at 1169.11 , 2.363 sec , sec (Spec # 104768)

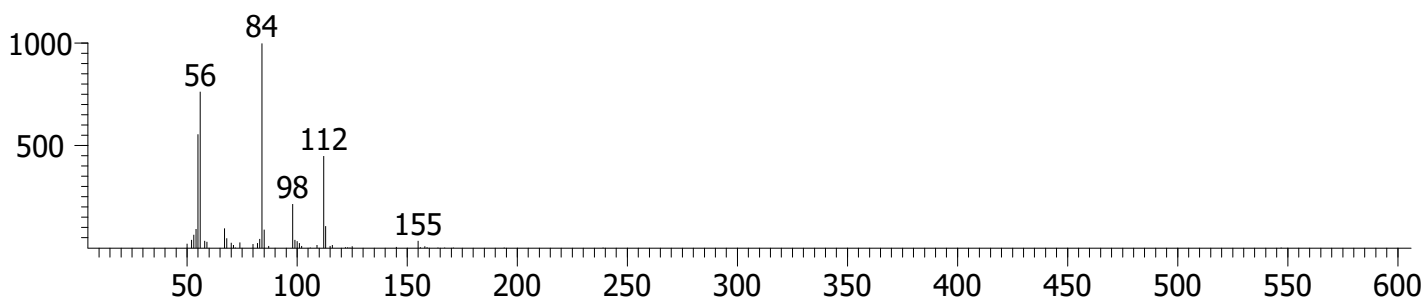

Library Hit - similarity 783, "1,3-Cyclopentanedione, 4-methyl-"

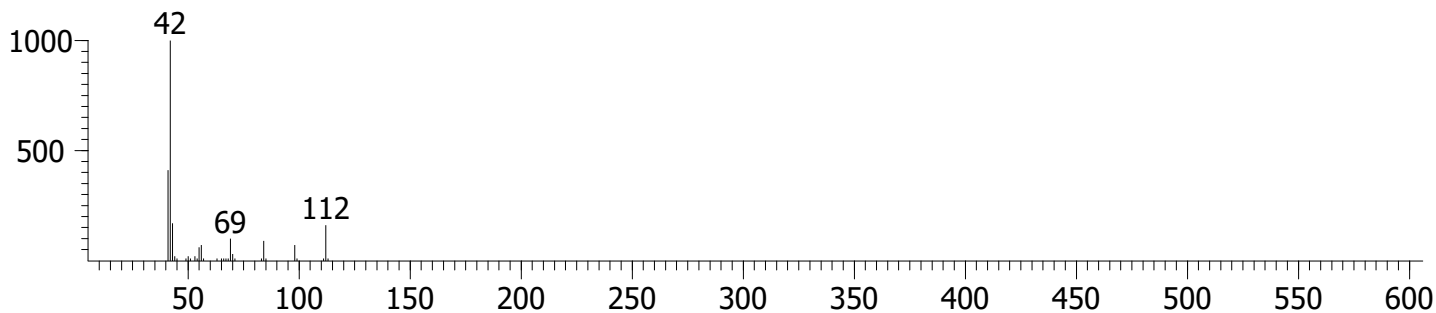

| Hit | Name                                                   | Similarity | Probability | CAS        | Library | Formula   | Weight |
|-----|--------------------------------------------------------|------------|-------------|------------|---------|-----------|--------|
| 1   | 1,3-Cyclopentanedione, 4-methyl-                       | 783        | 4379        | 35029-03-9 | mainlib | C6H8O2    | 112    |
| 2   | 2H-Pyran-2,6(3H)-dione                                 | 743        | 1015        | 5926-95-4  | mainlib | C5H4O3    | 112    |
| 3   | Aziridine, 1-ethyl-2-methyl-3-(1-methylethyl)-, trans- | 730        | 656         | 55702-73-3 | mainlib | C8H17N    | 127    |
| 4   | 2-Amino-oxazole                                        | 729        | 630         | 4570-45-0  | mainlib | C3H4N2O   | 84     |
| 5   | 1,5-Diazocine, octahydro-1,5-dinitroso-                | 723        | 495         | 55556-89-3 | mainlib | C6H12N4O2 | 172    |

# Formamide, N-(2-acetylphenyl)-

1st Dimension R.T. = 1378.99  
2nd Dimension R.T. = 2.449  
Quant Mass(es) = 120  
S/N = 2685.8  
Area = 967479  
Height = 92120  
Similarity = 884

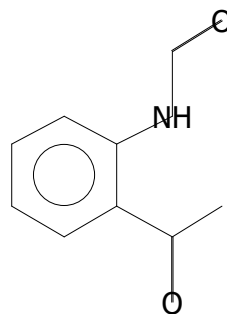

Peak Apex - sample "AnBxr B (20191121):1", peak 4345, at 1378.99 , 2.449 sec , sec (Spec # 136581)

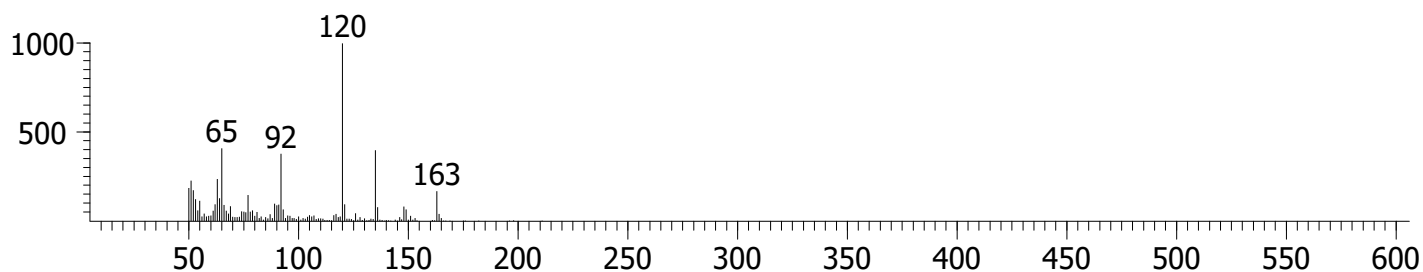

Peak True - sample "AnBxr B (20191121):1", peak 4345, at 1378.99 , 2.449 sec , sec (Spec # 136581)

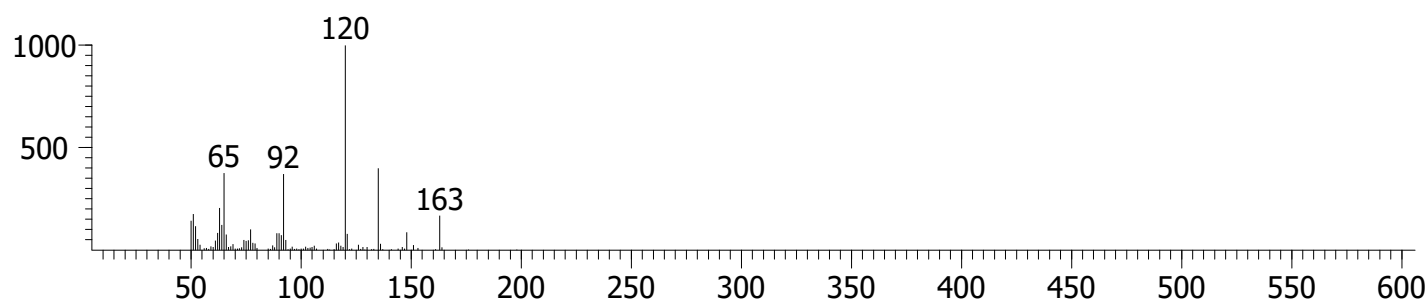

Library Hit - similarity 884, "Formamide, N-(2-acetylphenyl)-"

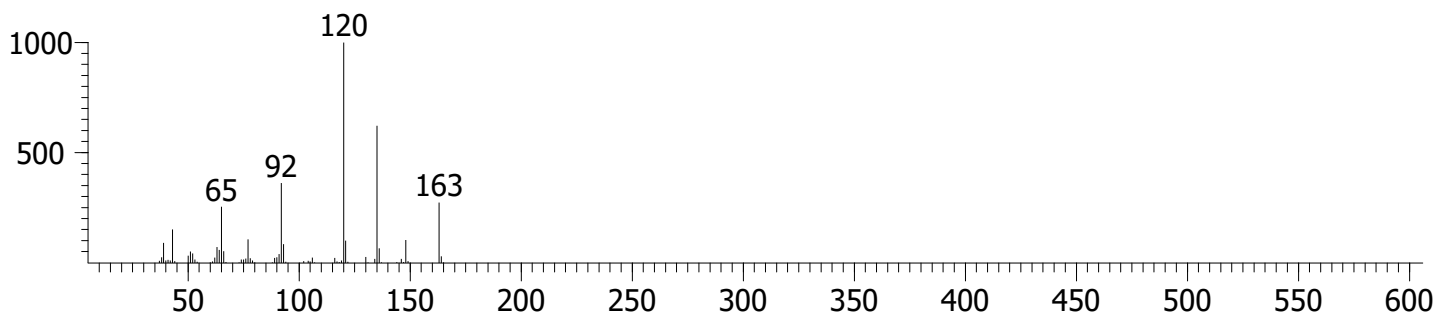

| Hit | Name                           | Similarity | Probability | CAS       | Library | Formula | Weight |
|-----|--------------------------------|------------|-------------|-----------|---------|---------|--------|
| 1   | Formamide, N-(2-acetylphenyl)- | 884        | 6685        | 5257-06-7 | mainlib | C9H9NO2 | 163    |
| 2   | Formamide, N-(2-acetylphenyl)- | 868        | 6102        | 5257-06-7 | replib  | C9H9NO2 | 163    |
| 3   | Acetophenone, 4'-amino-        | 844        | 2045        | 99-92-3   | replib  | C8H9NO  | 135    |
| 4   | Ethanone, 1-(2-aminophenyl)-   | 833        | 1347        | 551-93-9  | mainlib | C8H9NO  | 135    |
| 5   | Ethanone, 1-(2-aminophenyl)-   | 827        | 1116        | 551-93-9  | replib  | C8H9NO  | 135    |

## Benzene.

### 1,4-dimethyl-2,5-bis(1-methylethyl)-

1st Dimension R.T. = 1494.42

2nd Dimension R.T. = 2.099

Quant Mass(es) = 175

S/N = 649.04

Area = 66684

Height = 6523.3

Similarity = 767

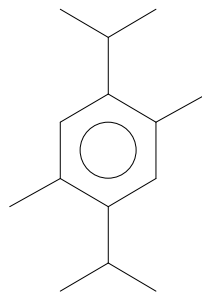

Peak Apex - sample "AnBxr B (20191121):1", peak 5116, at 1494.42 , 2.099 sec , sec (Spec # 154018)

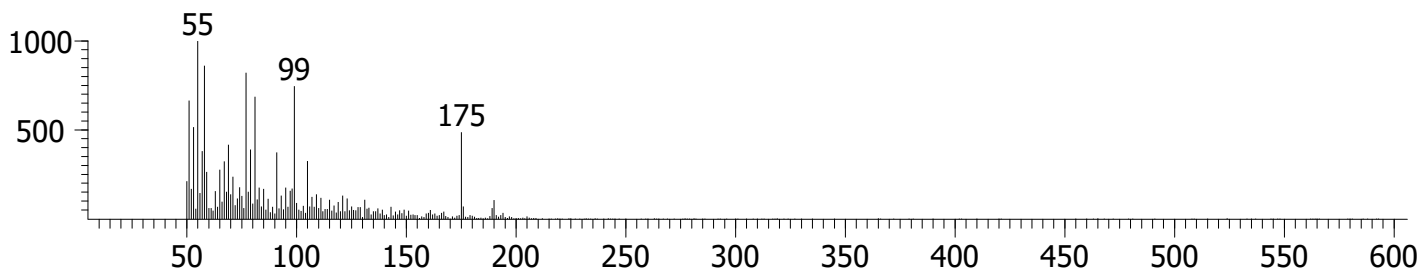

Peak True - sample "AnBxr B (20191121):1", peak 5116, at 1494.42 , 2.099 sec , sec (Spec # 154018)

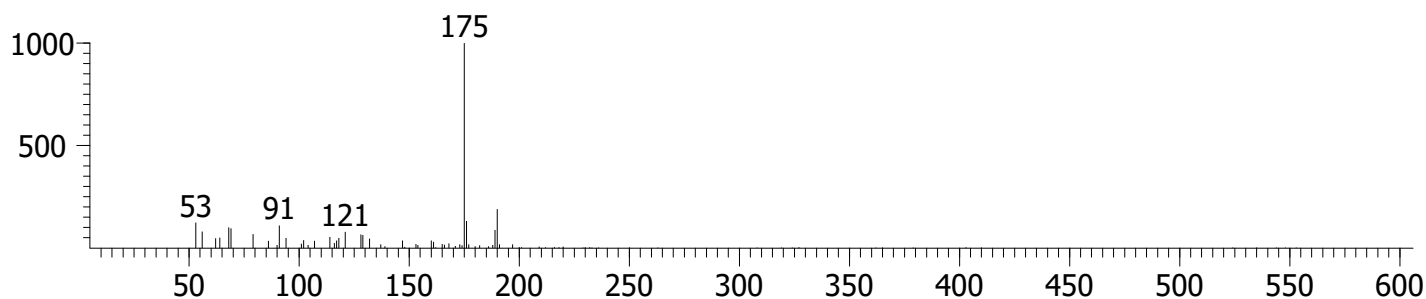

Library Hit - similarity 767, "Benzene, 1,4-dimethyl-2,5-bis(1-methylethyl)-"

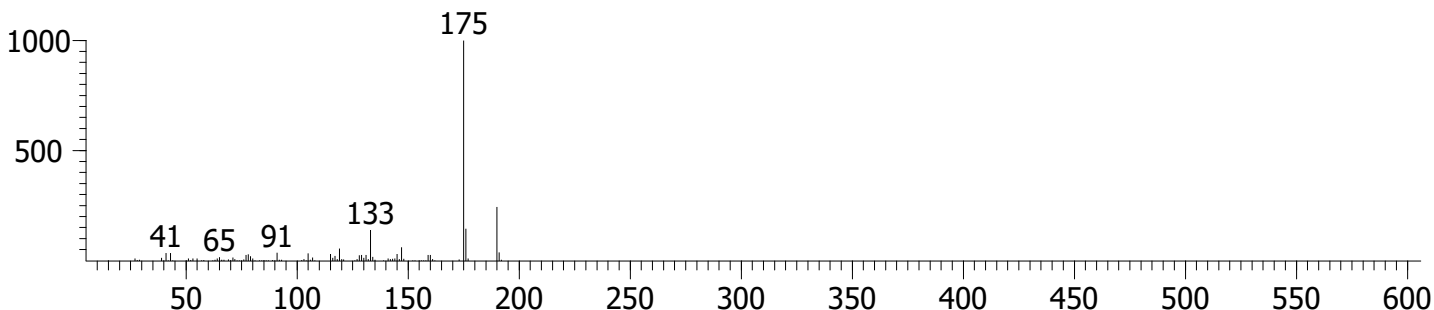

| Hit | Name                                                                                                                          | Similarity | Probability | CAS        | Library | Formula    | Weight |
|-----|-------------------------------------------------------------------------------------------------------------------------------|------------|-------------|------------|---------|------------|--------|
| 1   | Benzene, 1,4-dimethyl-2,5-bis(1-methylethyl)-                                                                                 | 767        | 4486        | 10375-96-9 | replib  | C14H22     | 190    |
| 2   | Precocene I                                                                                                                   | 755        | 1805        | 17598-02-6 | mainlib | C12H14O2   | 190    |
| 3   | Benzene, 1,4-bis(1,1-dimethylethyl)-                                                                                          | 753        | 2808        | 1012-72-2  | replib  | C14H22     | 190    |
| 4   | 1,2,5-Oxadiazole-3-carboxamide, 4-amino-N-[2-[[[(2,3-dihydro-1,3-dimethyl-2-oxo-1H-1,3-benzimidazol-5-yl)methyl]amino]ethyl]- | 742        | 1166        | 0-00-0     | mainlib | C15H19N7O3 | 345    |
| 5   | Benzene, 1,5-dimethyl-2,4-bis(1-methylethyl)-                                                                                 | 736        | 916         | 5186-68-5  | mainlib | C14H22     | 190    |

### 3,5-di-tert-Butyl-4-hydroxybenzyl alcohol

1st Dimension R.T. = 1574.87  
2nd Dimension R.T. = 1.861  
Quant Mass(es) = 221  
S/N = 695.93  
Area = 91651  
Height = 7184.3  
Similarity = 673

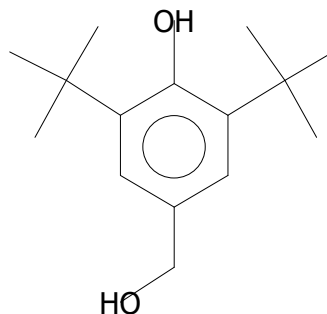

Peak Apex - sample "AnBxr B (20191121):1", peak 5670, at 1574.87 , 1.861 sec , sec (Spec # 166172)

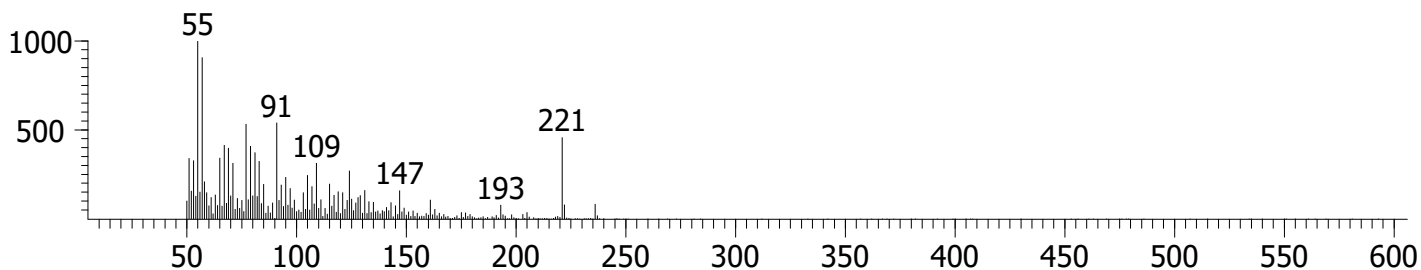

Peak True - sample "AnBxr B (20191121):1", peak 5670, at 1574.87 , 1.861 sec , sec (Spec # 166172)

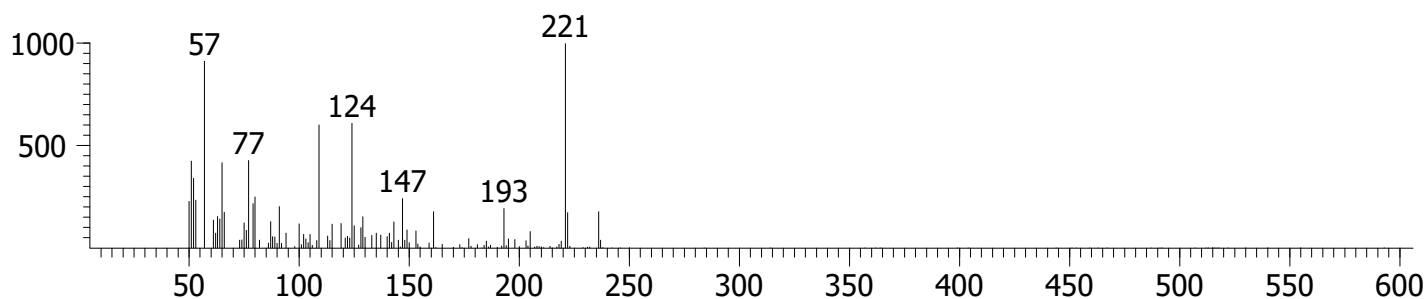

Library Hit - similarity 673, "3,5-di-tert-Butyl-4-hydroxybenzyl alcohol"

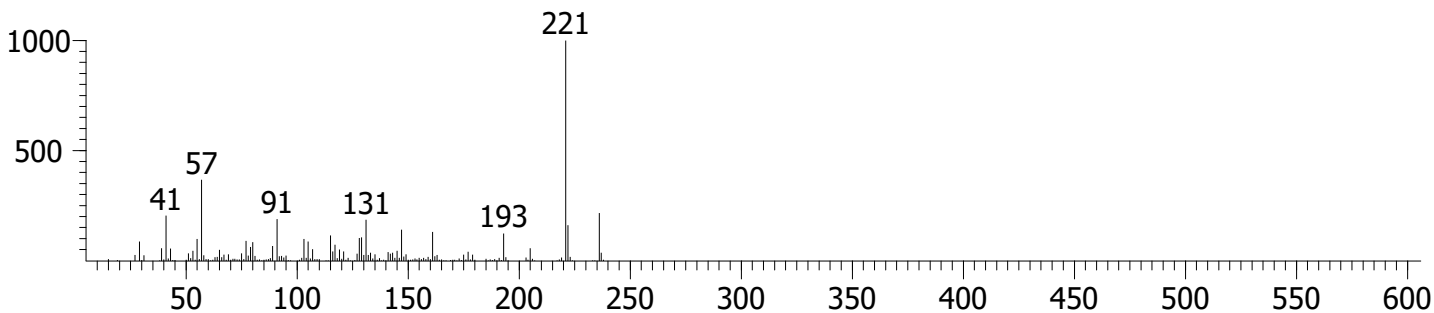

| Hit | Name                                      | Similarity | Probability | CAS      | Library | Formula  | Weight |
|-----|-------------------------------------------|------------|-------------|----------|---------|----------|--------|
| 1   | 3,5-di-tert-Butyl-4-hydroxybenzyl alcohol | 673        | 7859        | 88-26-6  | replib  | C15H24O2 | 236    |
| 2   | 3,5-di-tert-Butyl-4-hydroxybenzyl alcohol | 621        | 7859        | 88-26-6  | replib  | C15H24O2 | 236    |
| 3   | 3,5-di-tert-Butyl-4-hydroxyanisole        | 613        | 1395        | 489-01-0 | replib  | C15H24O2 | 236    |
| 4   | 3,5-di-tert-Butyl-4-hydroxybenzyl alcohol | 600        | 1541        | 88-26-6  | mainlib | C15H24O2 | 236    |
| 5   | 3,5-di-tert-Butyl-4-hydroxyanisole        | 599        | 1481        | 489-01-0 | mainlib | C15H24O2 | 236    |

# p-Hydroxybiphenyl

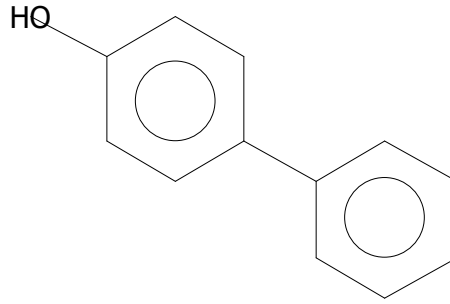

1st Dimension R.T. = 1585.37

2nd Dimension R.T. = 2.251

Quant Mass(es) = 170

S/N = 2186.2

Area = 336441

Height = 31627

Similarity = 868

Peak Apex - sample "AnBxr B (20191121):1", peak 5743, at 1585.37 , 2.251 sec , sec (Spec # 167821)

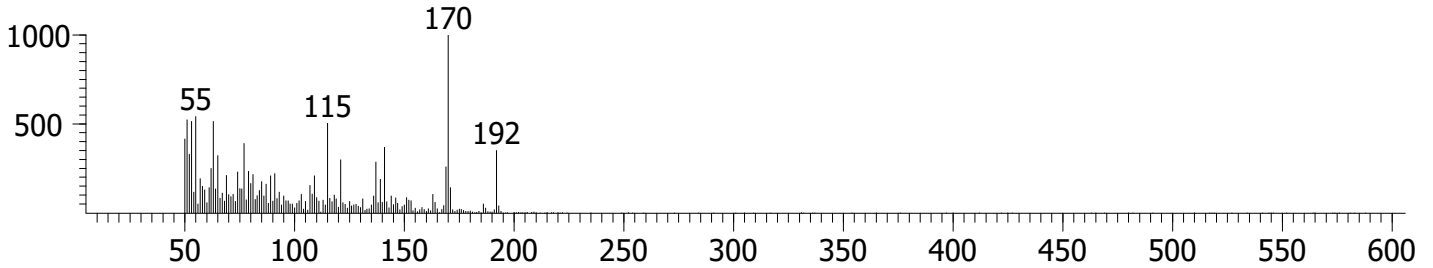

Peak True - sample "AnBxr B (20191121):1", peak 5743, at 1585.37 , 2.251 sec , sec (Spec # 167821)

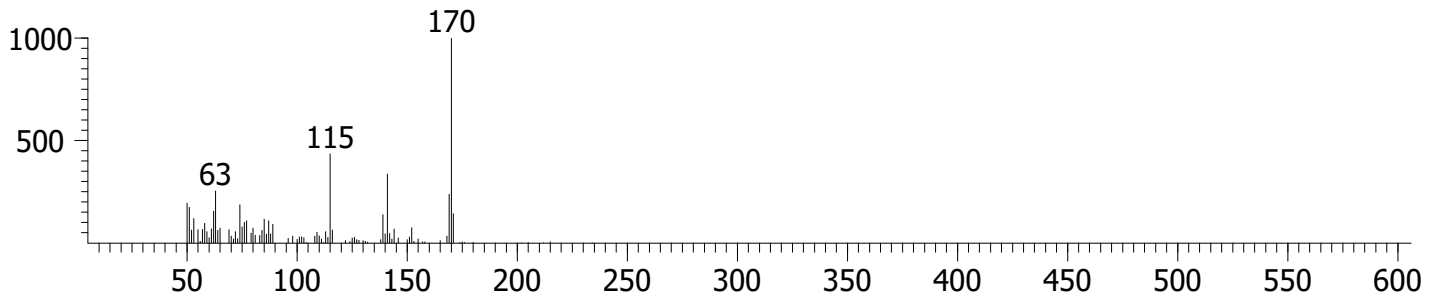

Library Hit - similarity 868, "p-Hydroxybiphenyl"

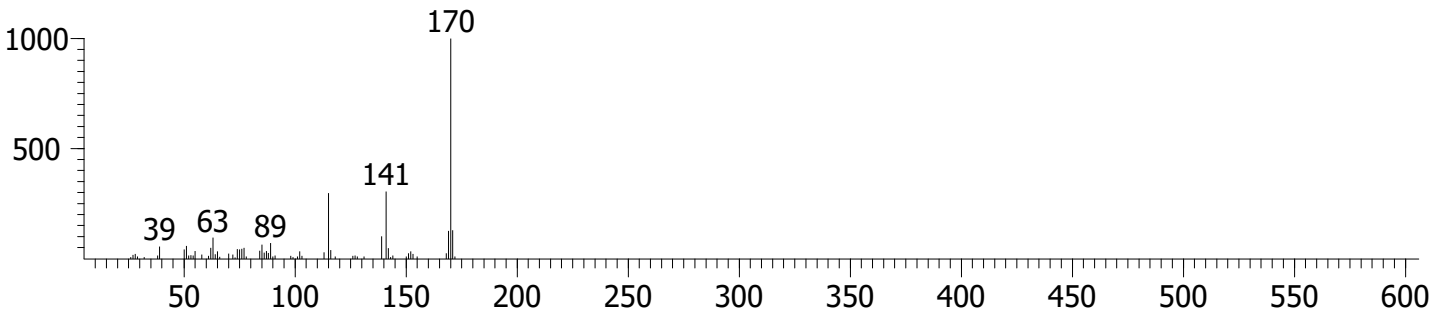

| Hit | Name              | Similarity | Probability | CAS      | Library | Formula | Weight |
|-----|-------------------|------------|-------------|----------|---------|---------|--------|
| 1   | p-Hydroxybiphenyl | 868        | 5395        | 92-69-3  | replib  | C12H10O | 170    |
| 2   | 3-Hydroxybiphenyl | 856        | 3593        | 580-51-8 | replib  | C12H10O | 170    |
| 3   | p-Hydroxybiphenyl | 820        | 5395        | 92-69-3  | replib  | C12H10O | 170    |
| 4   | o-Hydroxybiphenyl | 811        | 765         | 90-43-7  | replib  | C12H10O | 170    |
| 5   | 3-Hydroxybiphenyl | 808        | 3593        | 580-51-8 | replib  | C12H10O | 170    |

# Benzene, 1-(chloromethyl)-3-phenoxy-

1st Dimension R.T. = 1777.76  
2nd Dimension R.T. = 2.323  
Quant Mass(es) = 183  
S/N = 161.71  
Area = 45410  
Height = 3907.8  
Similarity = 651

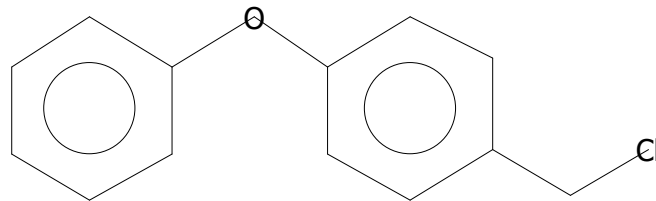

Peak Apex - sample "AnBxr B (20191121):1", peak 6929, at 1777.76 , 2.323 sec , sec (Spec # 196982)

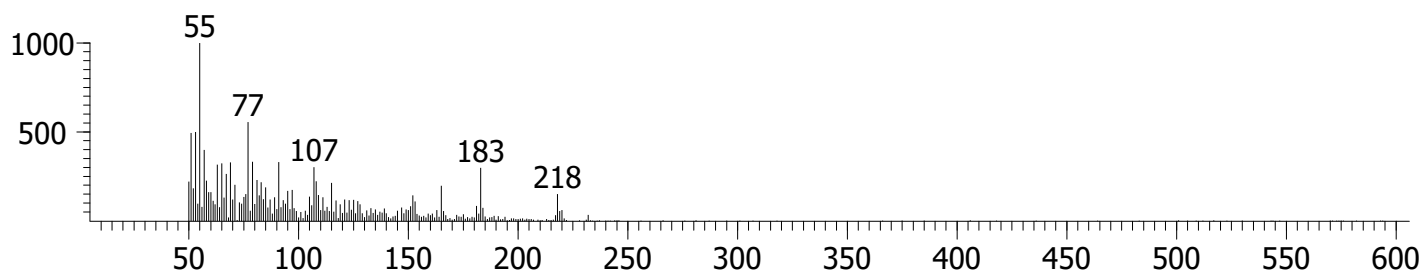

Peak True - sample "AnBxr B (20191121):1", peak 6929, at 1777.76 , 2.323 sec , sec (Spec # 196982)

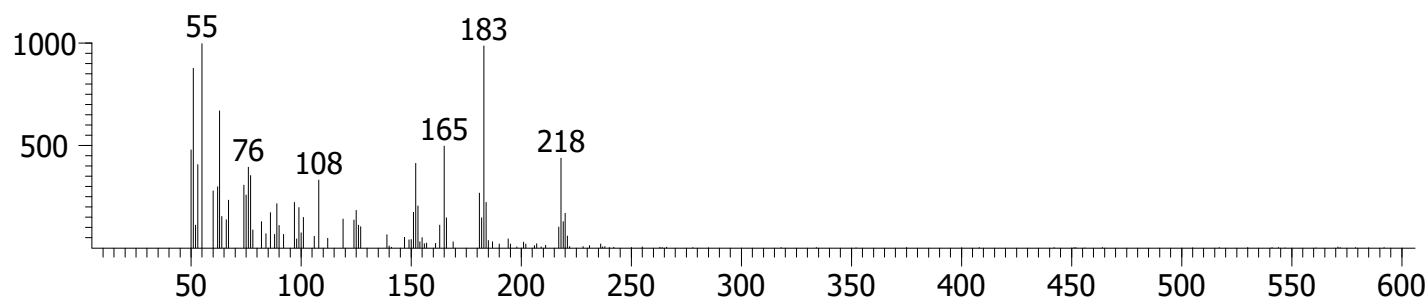

Library Hit - similarity 651, "Benzene, 1-(chloromethyl)-3-phenoxy-"

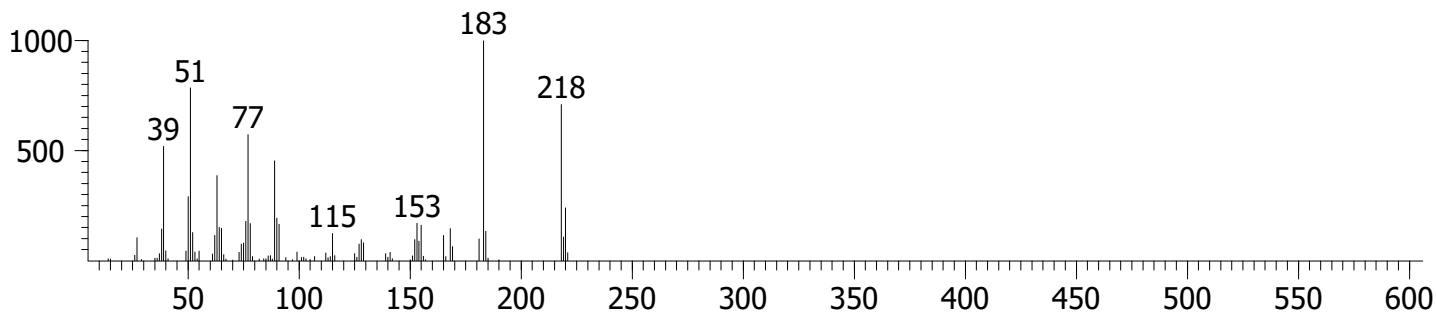

| Hit | Name                                 | Similarity | Probability | CAS        | Library | Formula   | Weight |
|-----|--------------------------------------|------------|-------------|------------|---------|-----------|--------|
| 1   | Benzene, 1-(chloromethyl)-3-phenoxy- | 651        | 4367        | 53874-66-1 | mainlib | C13H11ClO | 218    |
| 2   | Clorophene                           | 643        | 5577        | 120-32-1   | replib  | C13H11ClO | 218    |
| 3   | Clorophene                           | 637        | 5577        | 120-32-1   | replib  | C13H11ClO | 218    |
| 4   | Clorophene                           | 630        | 1858        | 120-32-1   | mainlib | C13H11ClO | 218    |
| 5   | Clorophene                           | 619        | 5577        | 120-32-1   | replib  | C13H11ClO | 218    |

3H-Cyclopenta[c]pyridazin-3-one,  
2,5,6,7-tetrahydro-

1st Dimension R.T. = 983.712  
2nd Dimension R.T. = 2.026  
Quant Mass(es) = 136  
S/N = 155.51  
Area = 22287  
Height = 2686.1  
Similarity = 706

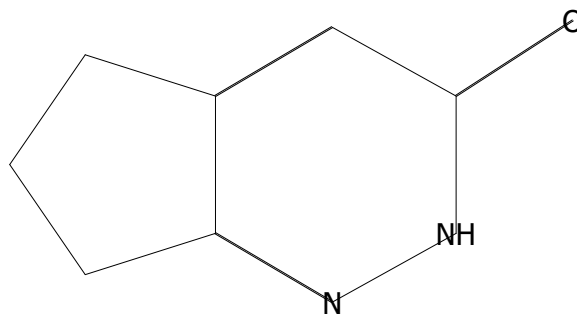

Peak Apex - sample "AnMbr C (20191120):1", peak 1696, at 983.712 , 2.026 sec , sec (Spec # 76627)

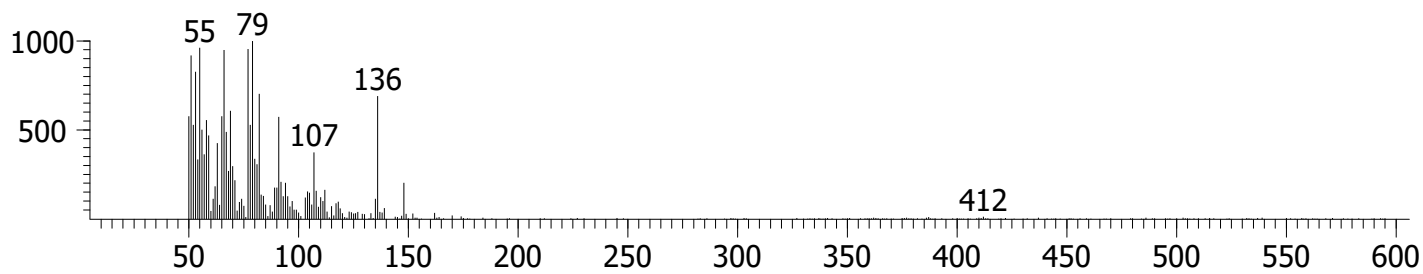

Peak True - sample "AnMbr C (20191120):1", peak 1696, at 983.712 , 2.026 sec , sec (Spec # 76627)

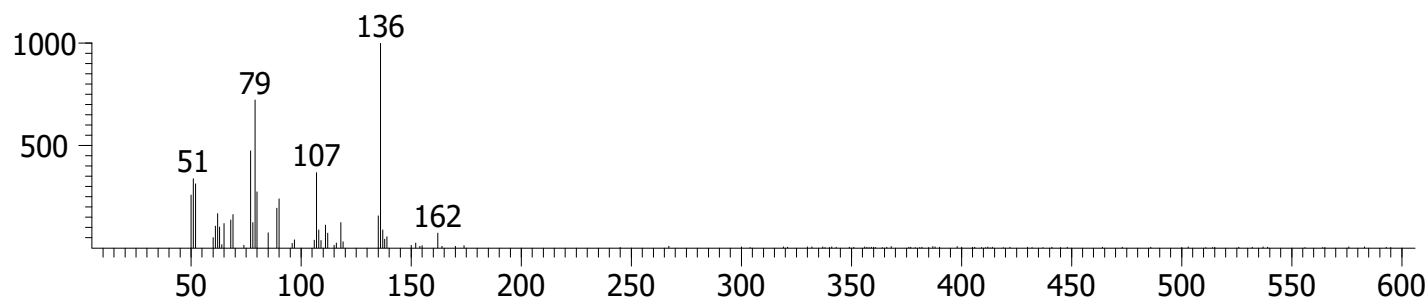

Library Hit - similarity 706, "3H-Cyclopenta[c]pyridazin-3-one, 2,5,6,7-tetrahydro-"

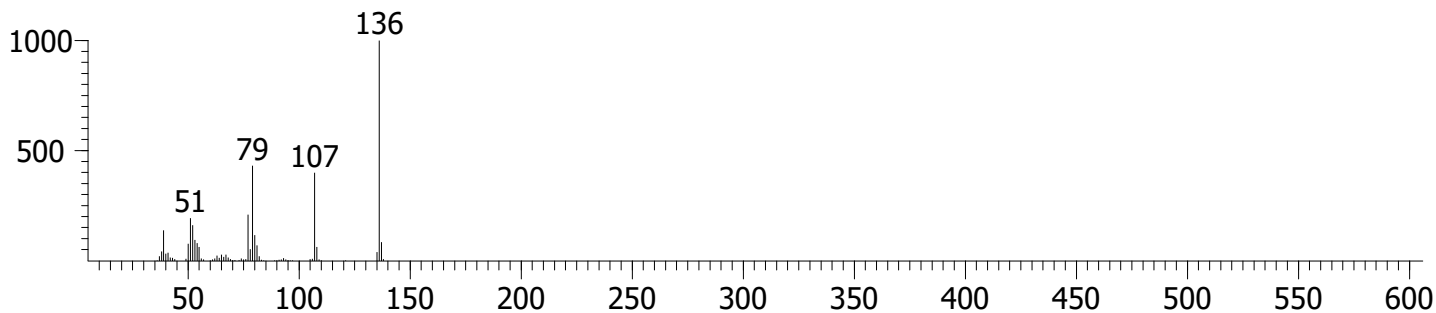

| Hit | Name                                                 | Similarity | Probability | CAS        | Library | Formula | Weight |
|-----|------------------------------------------------------|------------|-------------|------------|---------|---------|--------|
| 1   | 3H-Cyclopenta[c]pyridazin-3-one, 2,5,6,7-tetrahydro- | 706        | 1938        | 0-00-0     | mainlib | C7H8N2O | 136    |
| 2   | 2-Methyl-3(2-furyl)acrolein                          | 696        | 1368        | 874-66-8   | mainlib | C8H8O2  | 136    |
| 3   | 3-Hydroxy-2-methylbenzaldehyde                       | 694        | 1262        | 90111-15-2 | mainlib | C8H8O2  | 136    |
| 4   | 2,7-Dioxa-tricyclo[4.4.0.0(3,8)]deca-4,9-diene       | 686        | 941         | 0-00-0     | mainlib | C8H8O2  | 136    |
| 5   | 2-Hydroxy-3-methylbenzaldehyde                       | 682        | 795         | 824-42-0   | mainlib | C8H8O2  | 136    |



# Trisulfide, methyl propyl

1st Dimension R.T. = 805.314

2nd Dimension R.T. = 1.703

Quant Mass(es) = 154

S/N = 637.09

Area = 64834

Height = 9281.7

Similarity = 724

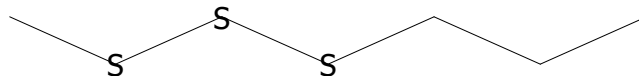

Peak Apex - sample "INF B Comp 091919 (20191122):1", peak 924, at 805.314 , 1.703 sec , sec (Spec # 49548)

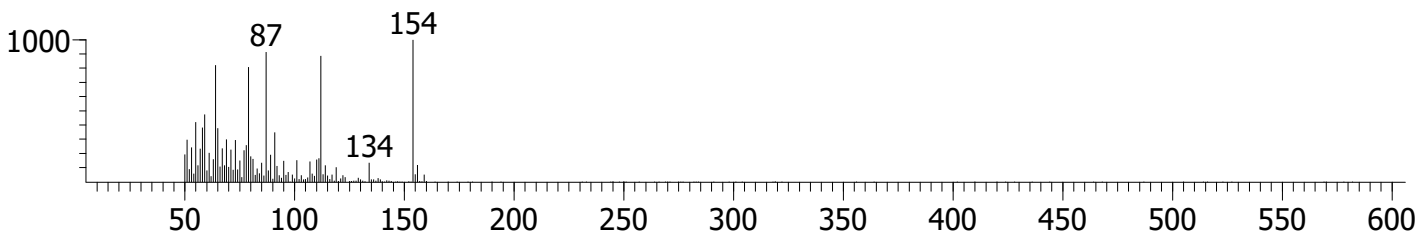

Peak True - sample "INF B Comp 091919 (20191122):1", peak 924, at 805.314 , 1.703 sec , sec (Spec # 49548)

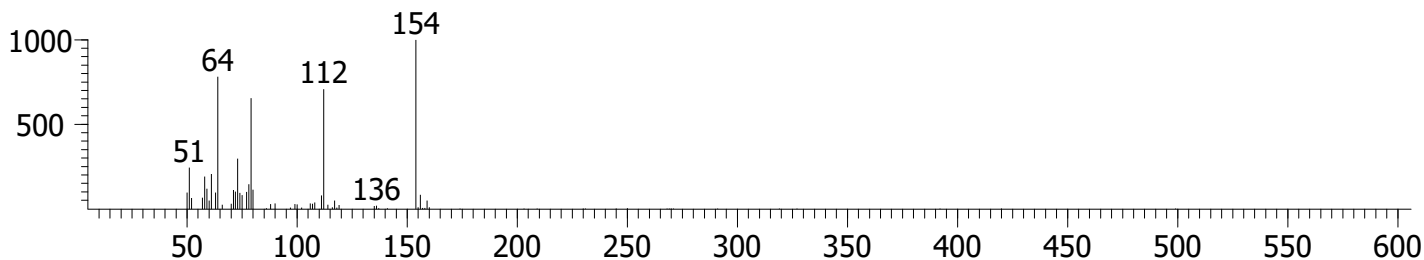

Library Hit - similarity 724, "Trisulfide, methyl propyl"

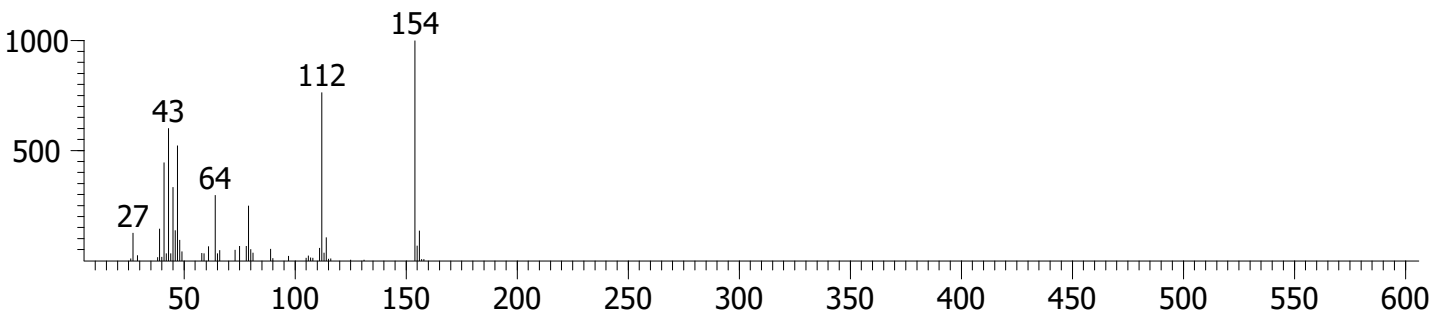

| Hit | Name                                            | Similarity | Probability | CAS        | Library | Formula    | Weight |
|-----|-------------------------------------------------|------------|-------------|------------|---------|------------|--------|
| 1   | Trisulfide, methyl propyl                       | 724        | 9358        | 17619-36-2 | mainlib | C4H10S3    | 154    |
| 2   | 1,2,4-Triazolo[4,3-b]pyridazine, 6-chloro-      | 530        | 132         | 28593-24-0 | mainlib | C5H3ClN4   | 154    |
| 3   | 1H-Pyrazolo[3,4-d]pyrimidine, 4-chloro-         | 511        | 64          | 0-00-0     | mainlib | C5H3ClN4   | 154    |
| 4   | 2-Thiatricyclo[3.3.1.1(3,7)]decane              | 509        | 59          | 281-25-4   | mainlib | C9H14S     | 154    |
| 5   | Thiophene-2-carboxamide, N-(2-p-tolyloxyethyl)- | 497        | 39          | 0-00-0     | mainlib | C14H15NO2S | 261    |

# Benzenemethanol, 4-(1,1-dimethylethyl)-

1st Dimension R.T. = 1095.65  
2nd Dimension R.T. = 1.749  
Quant Mass(es) = 149  
S/N = 685.54  
Area = 147780  
Height = 15173  
Similarity = 821

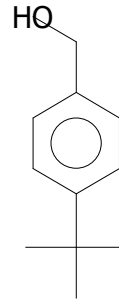

Peak Apex - sample "INF B Comp 091919 (20191122):1", peak 2291, at 1095.65 , 1.749 sec , sec (Spec # 93 545)

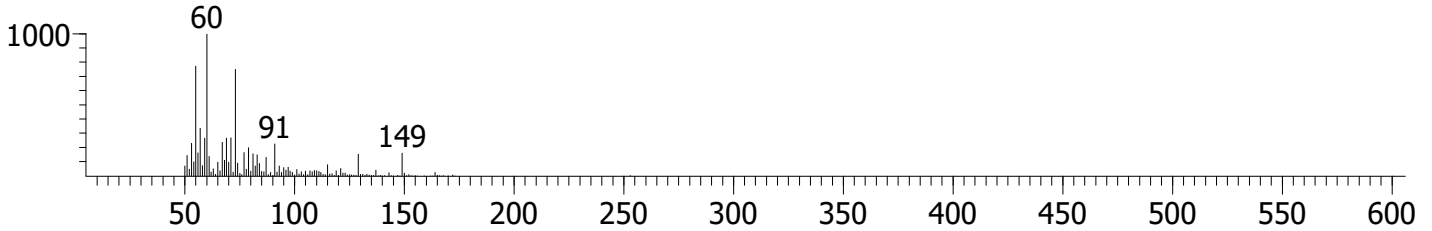

Peak True - sample "INF B Comp 091919 (20191122):1", peak 2291, at 1095.65 , 1.749 sec , sec (Spec # 935 45)

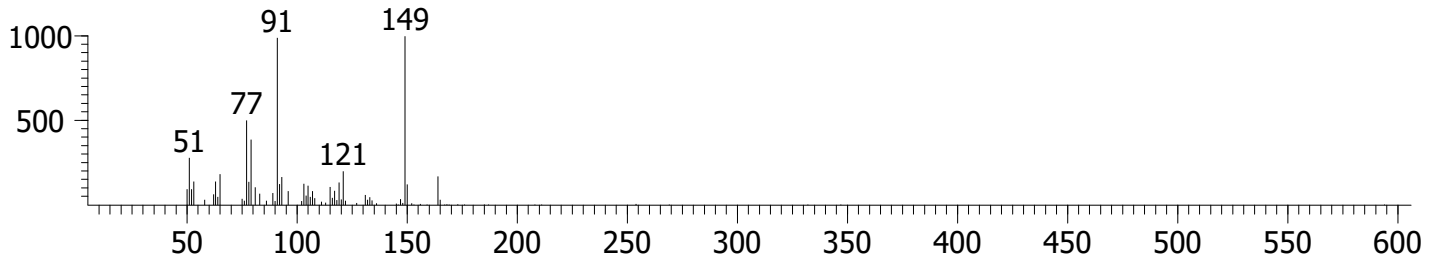

Library Hit - similarity 821, "Benzenemethanol, 4-(1,1-dimethylethyl)-"

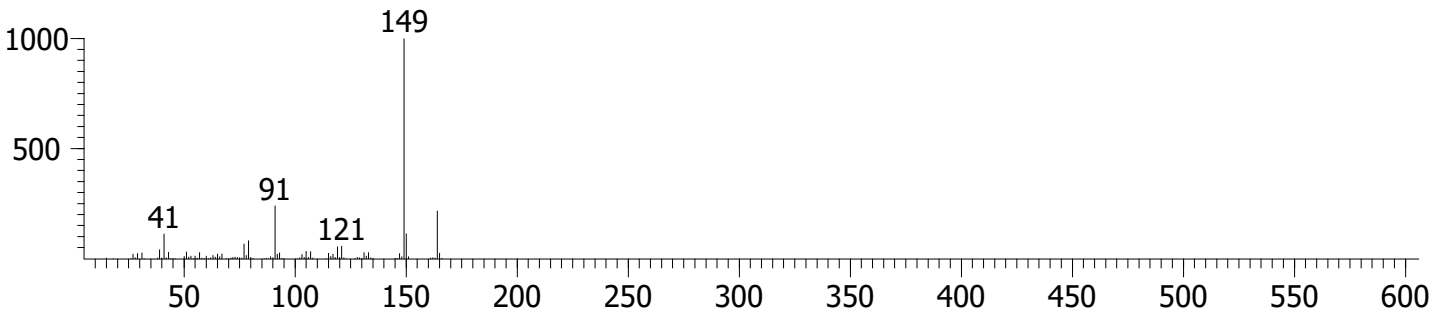

| Hit | Name                                                       | Similarity | Probability | CAS       | Library | Formula | Weight |
|-----|------------------------------------------------------------|------------|-------------|-----------|---------|---------|--------|
| 1   | Benzenemethanol, 4-(1,1-dimethylethyl)-                    | 821        | 4333        | 877-65-6  | mainlib | C11H16O | 164    |
| 2   | Cyclopropane, 1-cyclopropylethynyl-2-methoxy-3,3-dimethyl- | 793        | 1251        | 0-00-0    | mainlib | C11H16O | 164    |
| 3   | Benzene, 2-methoxy-1-methyl-4-(1-methylethyl)-             | 779        | 783         | 6379-73-3 | mainlib | C11H16O | 164    |
| 4   | Benzene, 2-methoxy-4-methyl-1-(1-methylethyl)-             | 767        | 521         | 1076-56-8 | mainlib | C11H16O | 164    |
| 5   | 1,3-Cyclohexadiene, 1,3,5,5,6,6-hexamethyl-                | 755        | 347         | 0-00-0    | mainlib | C12H20  | 164    |

## 4-Aminobenzoic acid

1st Dimension R.T. = 1364.99

2nd Dimension R.T. = 2.303

Quant Mass(es) = 120

S/N = 168.04

Area = 47269

Height = 4746.6

Similarity = 689

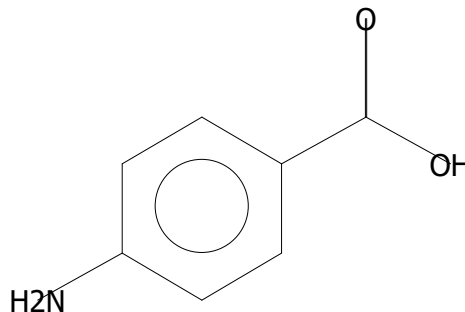

Peak Apex - sample "INF B Comp 091919 (20191122):1", peak 3912, at 1364.99 , 2.303 sec , sec (Spec # 134439)

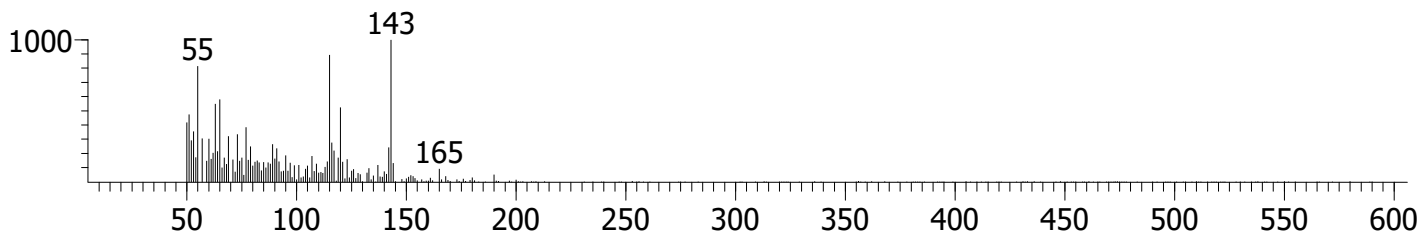

Peak True - sample "INF B Comp 091919 (20191122):1", peak 3912, at 1364.99 , 2.303 sec , sec (Spec # 134439)

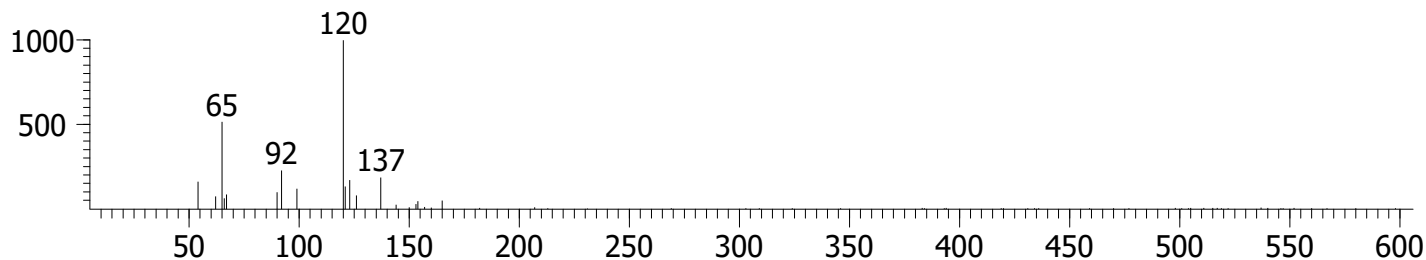

Library Hit - similarity 689, "4-Aminobenzoic acid"

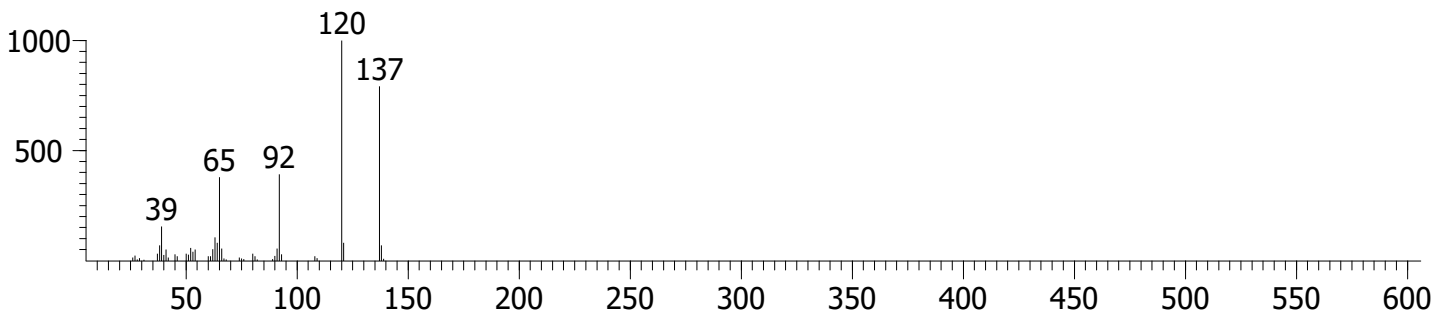

| Hit | Name                                                            | Similarity | Probability | CAS        | Library | Formula    | Weight |
|-----|-----------------------------------------------------------------|------------|-------------|------------|---------|------------|--------|
| 1   | 4-Aminobenzoic acid                                             | 689        | 1975        | 150-13-0   | mainlib | C7H7NO2    | 137    |
| 2   | Benzoic acid, 4-amino-, 2,2,6,6-tetramethyl-1-piperidinyl ester | 672        | 1078        | 0-00-0     | mainlib | C16H24N2O2 | 276    |
| 3   | Benzoic acid, 4,4'-(hydrazine-1,2-diyl)bis-                     | 667        | 869         | 62327-30-4 | mainlib | C14H12N2O4 | 272    |
| 4   | Salicylamide                                                    | 665        | 801         | 65-45-2    | mainlib | C7H7NO2    | 137    |
| 5   | Diethyl N-(p-aminobenzoyl)-L-glutamate                          | 645        | 365         | 13726-52-8 | mainlib | C16H22N2O5 | 322    |

## Etiracetam

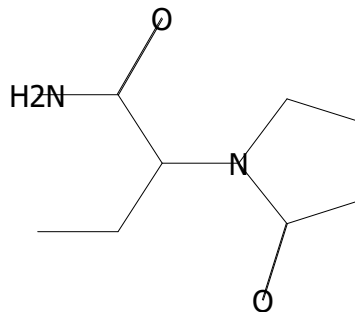

1st Dimension R.T. = 1368.49

2nd Dimension R.T. = 2.482

Quant Mass(es) = 126

S/N = 3047.7

Area = 659055

Height = 58394

Similarity = 917

Peak Apex - sample "INF B Comp 091919 (20191122):1", peak 3946, at 1368.49 , 2.482 sec , sec (Spec # 134996)

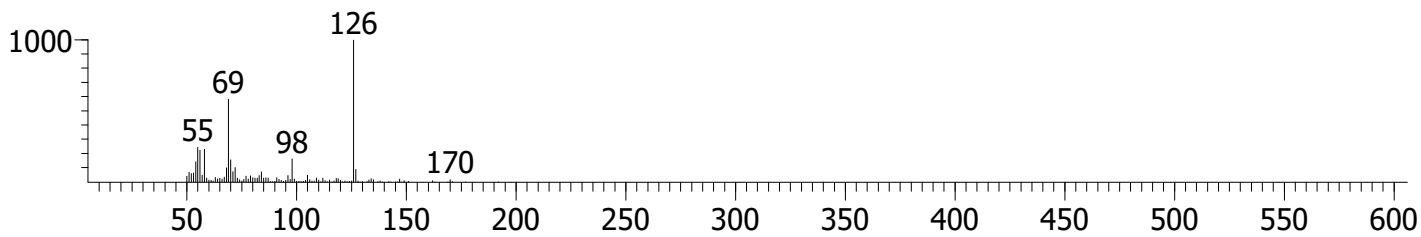

Peak True - sample "INF B Comp 091919 (20191122):1", peak 3946, at 1368.49 , 2.482 sec , sec (Spec # 134996)

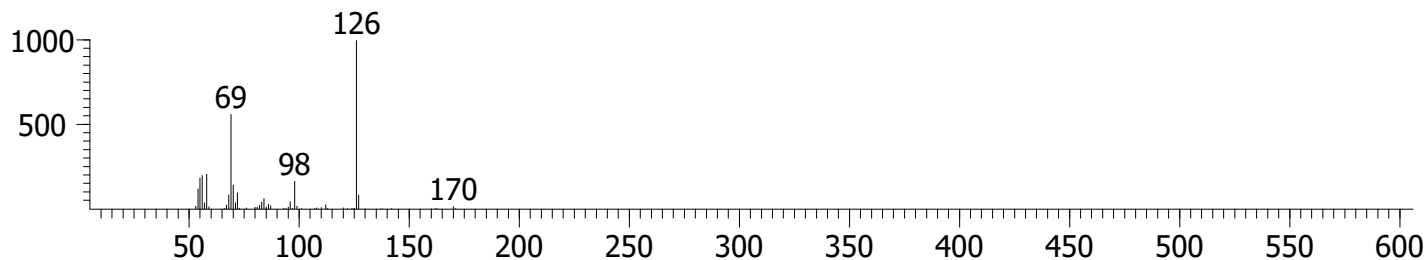

Library Hit - similarity 917, "Etiracetam"

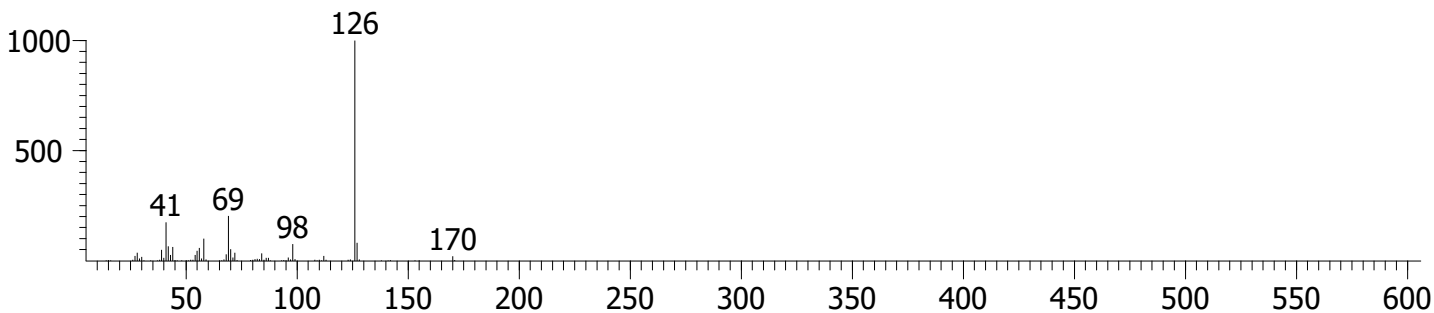

| Hit | Name                                                       | Similarity | Probability | CAS         | Library | Formula   | Weight |
|-----|------------------------------------------------------------|------------|-------------|-------------|---------|-----------|--------|
| 1   | Etiracetam                                                 | 917        | 4592        | 33996-58-6  | mainlib | C8H14N2O2 | 170    |
| 2   | Levetiracetam                                              | 916        | 4414        | 102767-28-2 | mainlib | C8H14N2O2 | 170    |
| 3   | 4H-Pyran-4-one, 5-hydroxy-2-methyl-                        | 816        | 328         | 644-46-2    | mainlib | C6H6O3    | 126    |
| 4   | 2,2-Diethyl-N-ethylpyrrolidine                             | 789        | 96          | 89214-92-6  | mainlib | C10H21N   | 155    |
| 5   | Aziridine, 2-(1,1-dimethylethyl)-1-ethyl-3-methyl-, trans- | 785        | 81          | 55669-79-9  | mainlib | C9H19N    | 141    |

# Propylparaben

1st Dimension R.T. = 1413.97

2nd Dimension R.T. = 2.020

Quant Mass(es) = 121

S/N = 9712.2

Area = 3314458

Height = 318867

Similarity = 939

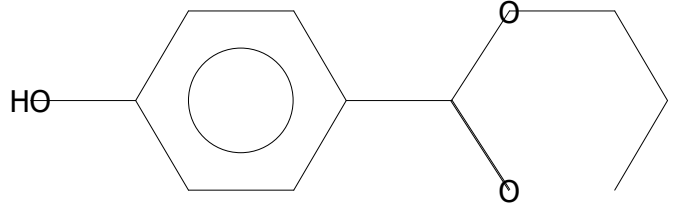

Peak Apex - sample "INF B Comp 091919 (20191122):1", peak 4229, at 1413.97 , 2.020 sec , sec (Spec # 141816)

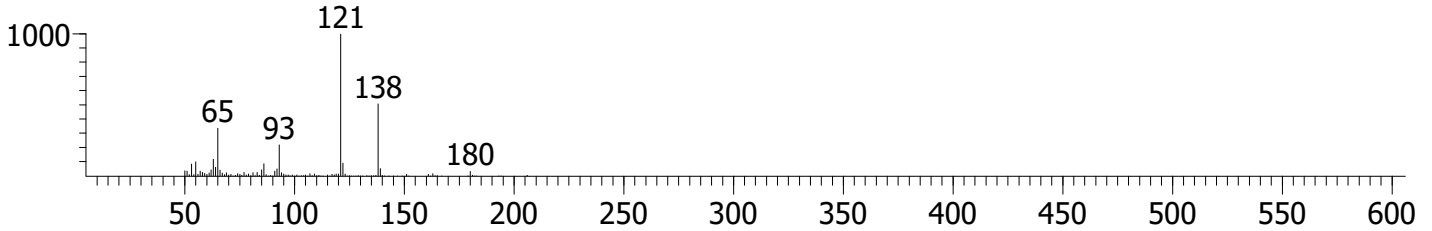

Peak True - sample "INF B Comp 091919 (20191122):1", peak 4229, at 1413.97 , 2.020 sec , sec (Spec # 141816)

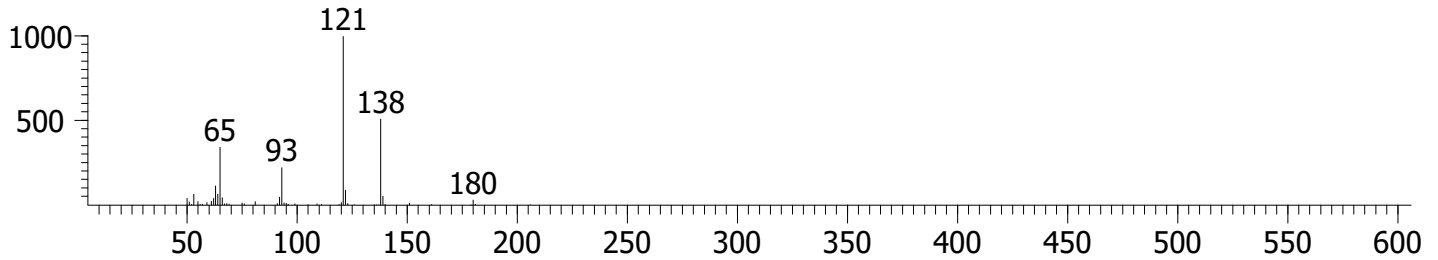

Library Hit - similarity 939, "Propylparaben"

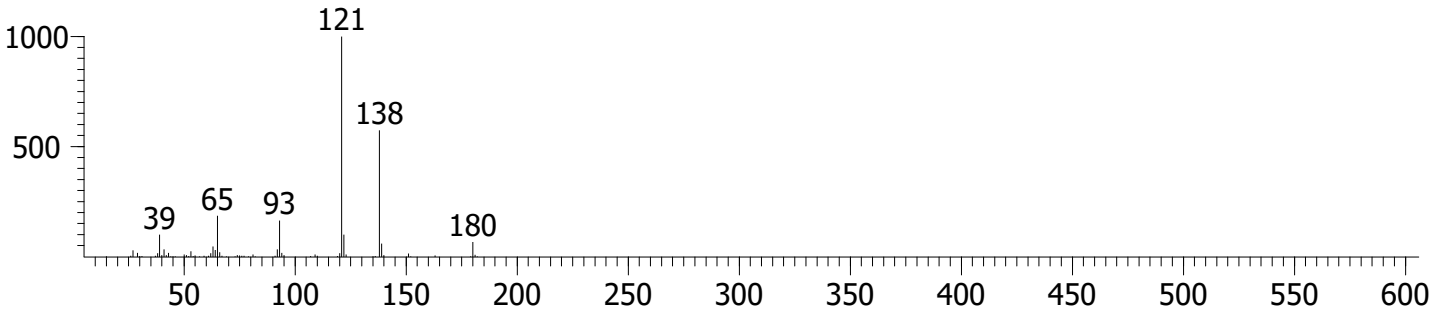

| Hit | Name                                           | Similarity | Probability | CAS       | Library | Formula  | Weight |
|-----|------------------------------------------------|------------|-------------|-----------|---------|----------|--------|
| 1   | Propylparaben                                  | 939        | 3041        | 94-13-3   | mainlib | C10H12O3 | 180    |
| 2   | Benzoic acid, 4-hydroxy-                       | 928        | 2086        | 99-96-7   | mainlib | C7H6O3   | 138    |
| 3   | Benzoic acid, 3-hydroxy-, 1-methylpropyl ester | 911        | 1138        | 0-00-0    | mainlib | C11H14O3 | 194    |
| 4   | 4-Hydroxybenzoic acid, O-isopropoxyxycarbonyl- | 908        | 1006        | 0-00-0    | mainlib | C11H12O5 | 224    |
| 5   | Isobutyl 4-hydroxybenzoate                     | 905        | 889         | 4247-02-3 | mainlib | C11H14O3 | 194    |

# Methanone, (2,4-dihydroxyphenyl)phenyl-

1st Dimension R.T. = 1921.18  
2nd Dimension R.T. = 2.528  
Quant Mass(es) = 213  
S/N = 4720.8  
Area = 871379  
Height = 72121  
Similarity = 868

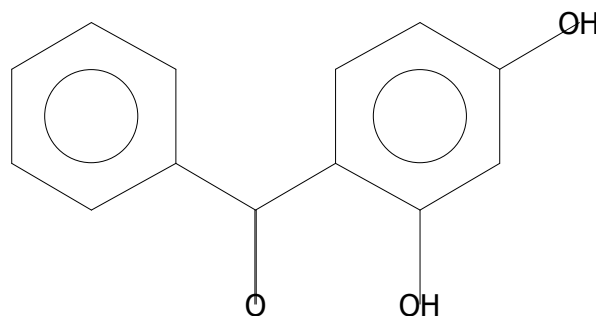

Peak Apex - sample "INF B Comp 091919 (20191122):1", peak 7081, at 1921.18 , 2.528 sec , sec (Spec # 218743)

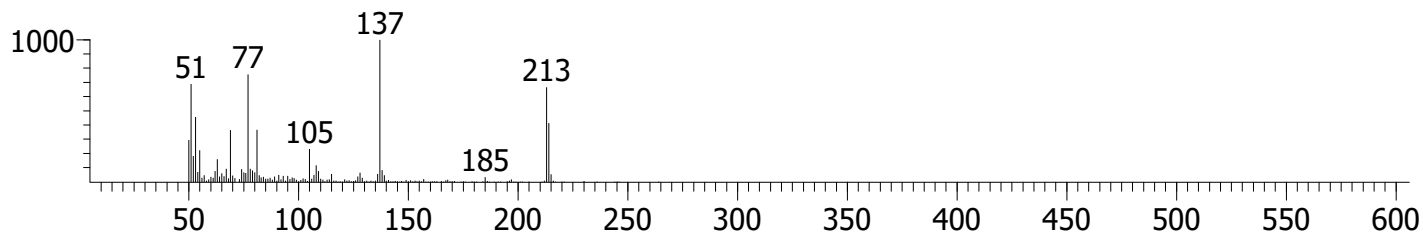

Peak True - sample "INF B Comp 091919 (20191122):1", peak 7081, at 1921.18 , 2.528 sec , sec (Spec # 218743)

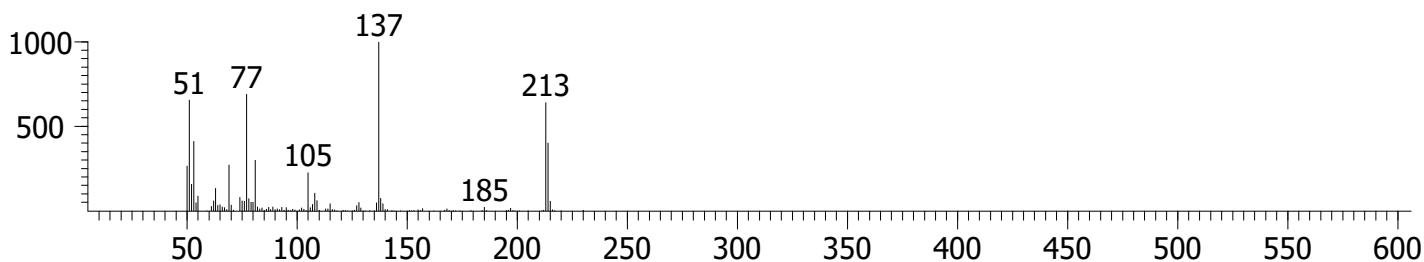

Library Hit - similarity 868, "Methanone, (2,4-dihydroxyphenyl)phenyl-"

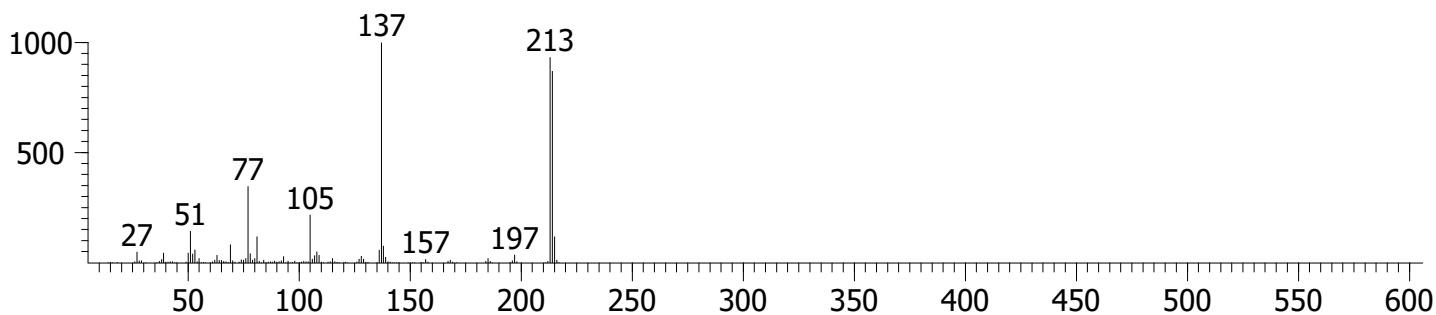

| Hit | Name                                    | Similarity | Probability | CAS        | Library | Formula  | Weight |
|-----|-----------------------------------------|------------|-------------|------------|---------|----------|--------|
| 1   | Methanone, (2,4-dihydroxyphenyl)phenyl- | 868        | 7913        | 131-56-6   | mainlib | C13H10O3 | 214    |
| 2   | Phen-1,3-diol, 2-benzoyl-               | 821        | 1655        | 63411-81-4 | mainlib | C13H10O3 | 214    |
| 3   | 2,5-Dihydroxybenzophenone               | 770        | 333         | 2050-37-5  | mainlib | C13H10O3 | 214    |
| 4   | 4-Benzoyl-1,3-phenylene diacetate       | 715        | 64          | 0-00-0     | mainlib | C17H14O5 | 298    |
| 5   | 3,4-Dihydroxybenzophenone               | 684        | 17          | 10425-11-3 | mainlib | C13H10O3 | 214    |

## 3H-1,2-Dithiole

1st Dimension R.T. = 493.992

2nd Dimension R.T. = 1.769

Quant Mass(es) = 103

S/N = 71.245

Area = 16726

Height = 2303.3

Similarity = 805

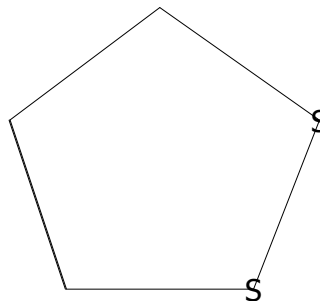

Peak Apex - sample "INF-C comp 091919 (111419):1", peak 21, at 493.992 , 1.769 sec , sec (Spec # 2388)

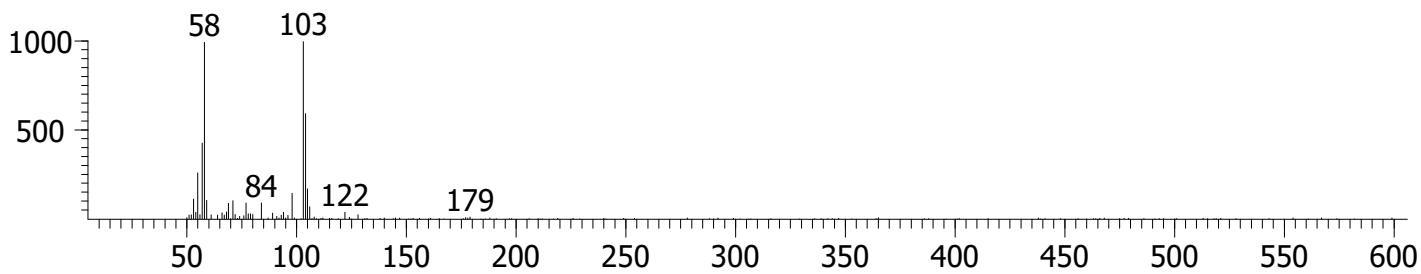

Peak True - sample "INF-C comp 091919 (111419):1", peak 21, at 493.992 , 1.769 sec , sec (Spec # 2388)

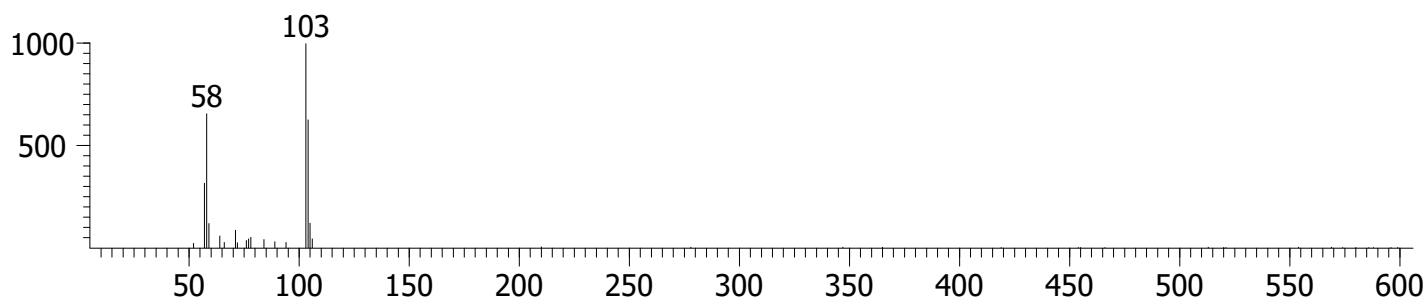

Library Hit - similarity 805, "3H-1,2-Dithiole"

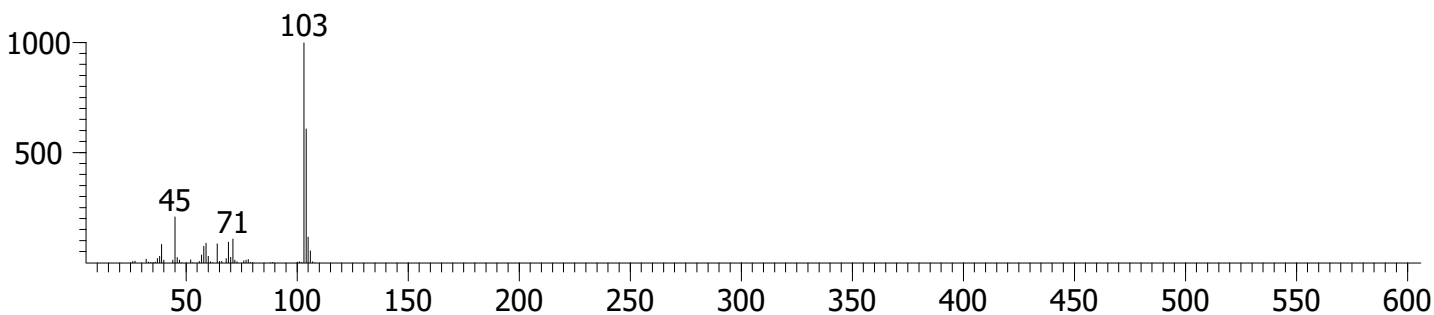

| Hit | Name                                           | Similarity | Probability | CAS        | Library | Formula  | Weight |
|-----|------------------------------------------------|------------|-------------|------------|---------|----------|--------|
| 1   | 3H-1,2-Dithiole                                | 805        | 9217        | 288-26-6   | mainlib | C3H4S2   | 104    |
| 2   | Dimethyl diglycolcarbonate                     | 642        | 224         | 87292-23-7 | mainlib | C8H14O7  | 222    |
| 3   | 3(2H)-Furanone, dihydro-2,2-dimethyl-5-phenyl- | 581        | 39          | 63678-00-2 | mainlib | C12H14O2 | 190    |
| 4   | Butyl 2,5,8,11-tetraoxatridecan-13-oate        | 575        | 30          | 0-00-0     | mainlib | C13H26O6 | 278    |
| 5   | Butyl 2,5,8,11,14-pentaoxahexadecan-16-oate    | 575        | 30          | 0-00-0     | mainlib | C15H30O7 | 322    |

## 2(5H)-Thiophenone, 5-methyl-

1st Dimension R.T. = 731.856  
2nd Dimension R.T. = 2.125  
Quant Mass(es) = 114  
S/N = 262.88  
Area = 33487  
Height = 4111.9  
Similarity = 694

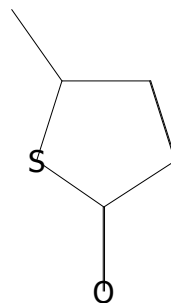

Peak Apex - sample "INF-C comp 091919 (111419):1", peak 653, at 731.856 , 2.125 sec , sec (Spec # 38482)

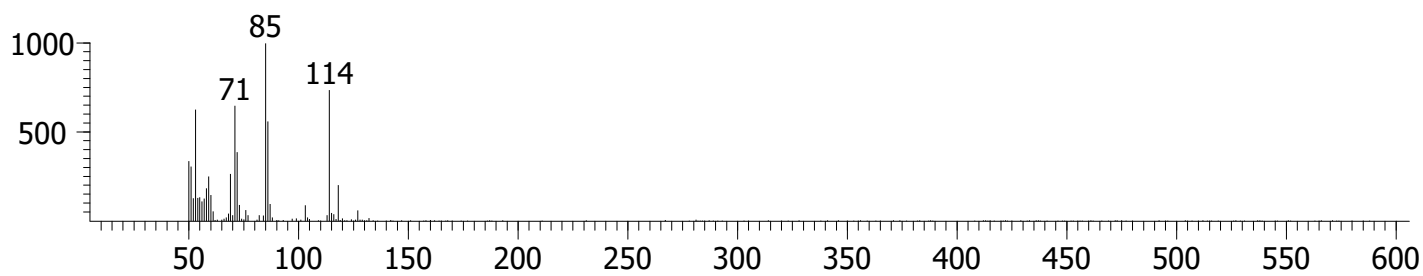

Peak True - sample "INF-C comp 091919 (111419):1", peak 653, at 731.856 , 2.125 sec , sec (Spec # 38482)

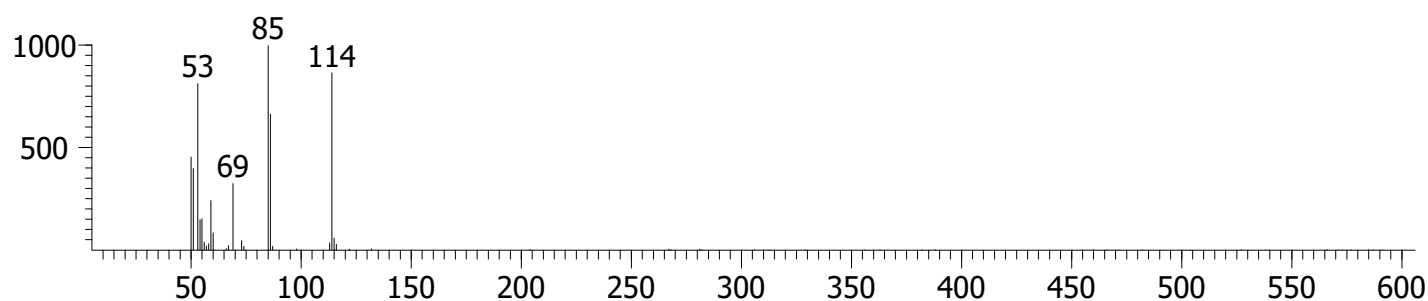

Library Hit - similarity 694, "2(5H)-Thiophenone, 5-methyl-"

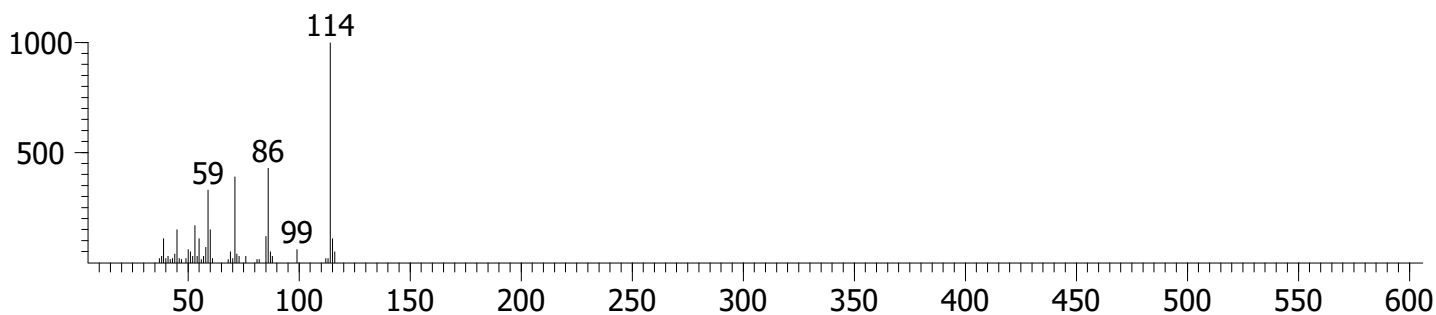

| Hit | Name                                        | Similarity | Probability | CAS        | Library | Formula | Weight |
|-----|---------------------------------------------|------------|-------------|------------|---------|---------|--------|
| 1   | 2(5H)-Thiophenone, 5-methyl-                | 694        | 3510        | 7210-64-2  | mainlib | C5H6OS  | 114    |
| 2   | Thiirane, ethenyl-                          | 678        | 2021        | 5954-75-6  | mainlib | C4H6S   | 86     |
| 3   | Thiophene, 2-(1,1-dimethylethoxy)-5-methyl- | 648        | 562         | 54461-04-0 | mainlib | C9H14OS | 170    |
| 4   | 2-Methyl-3-furanthiol                       | 648        | 562         | 28588-74-1 | mainlib | C5H6OS  | 114    |
| 5   | 2,4-Hexanedione                             | 644        | 474         | 3002-24-2  | mainlib | C6H10O2 | 114    |



## 5-Methyl-1,2,3,4-tetrathiane

1st Dimension R.T. = 1109.64  
2nd Dimension R.T. = 2.330  
Quant Mass(es) = 170  
S/N = 1798.5  
Area = 249536  
Height = 27295  
Similarity = 950

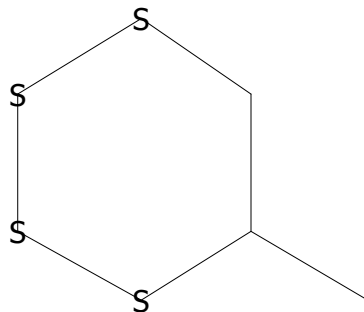

Peak Apex - sample "INF-C comp 091919 (111419):1", peak 2057, at 1109.64 , 2.330 sec , sec (Spec # 95753)

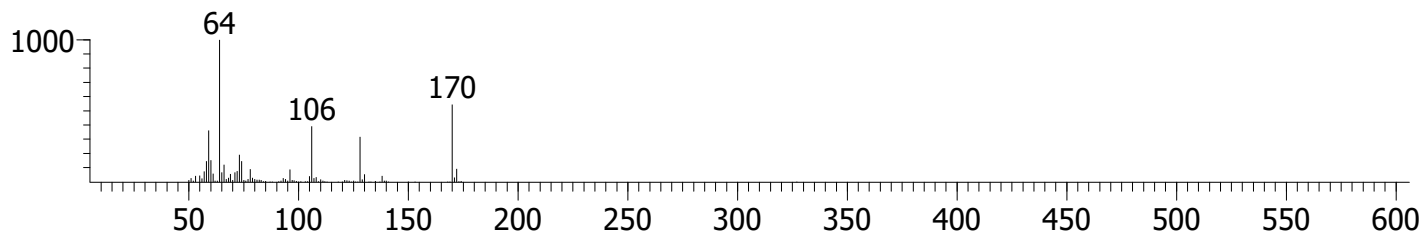

Peak True - sample "INF-C comp 091919 (111419):1", peak 2057, at 1109.64 , 2.330 sec , sec (Spec # 95753)

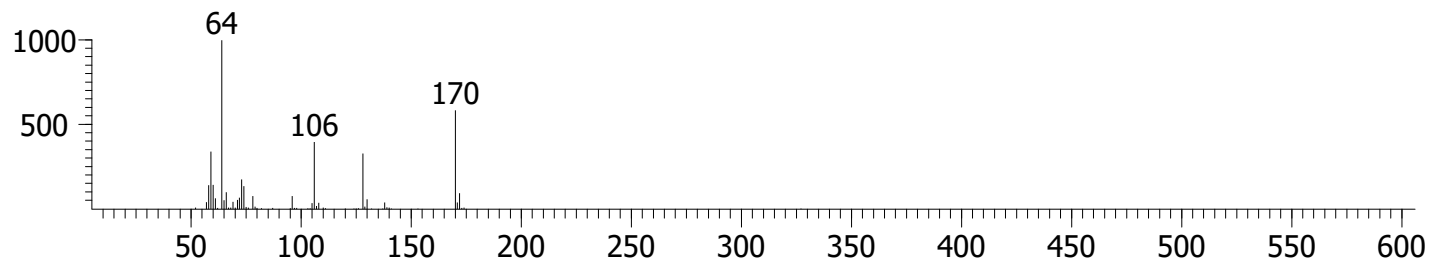

Library Hit - similarity 950, "5-Methyl-1,2,3,4-tetrathiane"

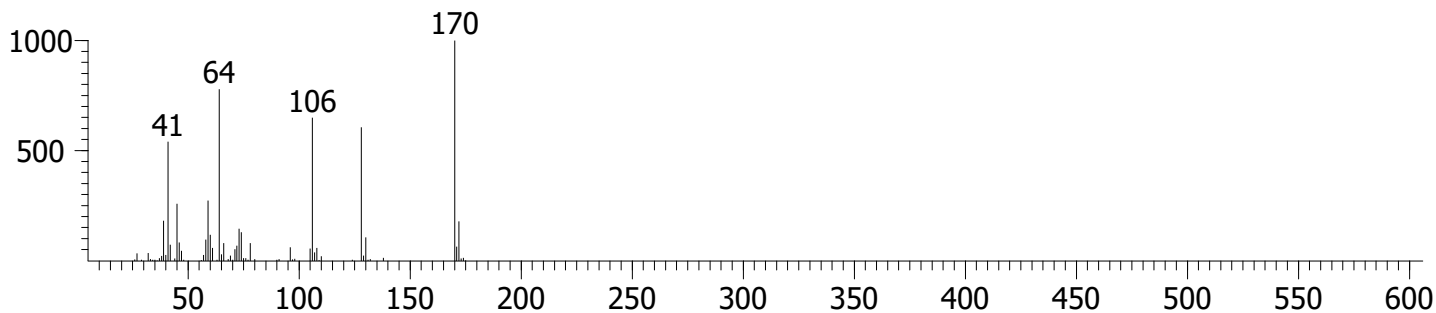

| Hit | Name                                | Similarity | Probability | CAS         | Library | Formula   | Weight |
|-----|-------------------------------------|------------|-------------|-------------|---------|-----------|--------|
| 1   | 5-Methyl-1,2,3,4-tetrathiane        | 950        | 9852        | 116664-30-3 | mainlib | C3H6S4    | 170    |
| 2   | 4,7-Diethyl-1,2,3,5,6-pentathiepane | 632        | 98          | 878997-71-8 | mainlib | C6H12S5   | 244    |
| 3   | 1,2-Dithiolane                      | 596        | 24          | 557-22-2    | mainlib | C3H6S2    | 106    |
| 4   | 5,7-Diethyl-1,2,3,4,6-pentathiepane | 577        | 11          | 0-00-0      | mainlib | C6H12S5   | 244    |
| 5   | 5-Chloro-1,2-dithian-4-ol           | 537        | 2           | 0-00-0      | mainlib | C4H7ClOS2 | 170    |

## 2-(2-Hydroxyethoxy)phenol

1st Dimension R.T. = 1312.52  
2nd Dimension R.T. = 2.204  
Quant Mass(es) = 110  
S/N = 640.26  
Area = 686408  
Height = 63103  
Similarity = 748

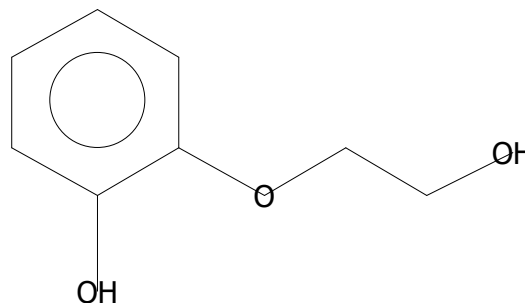

Peak Apex - sample "INF-C comp 091919 (111419):1", peak 3044, at 1312.52 , 2.204 sec , sec (Spec # 126474)

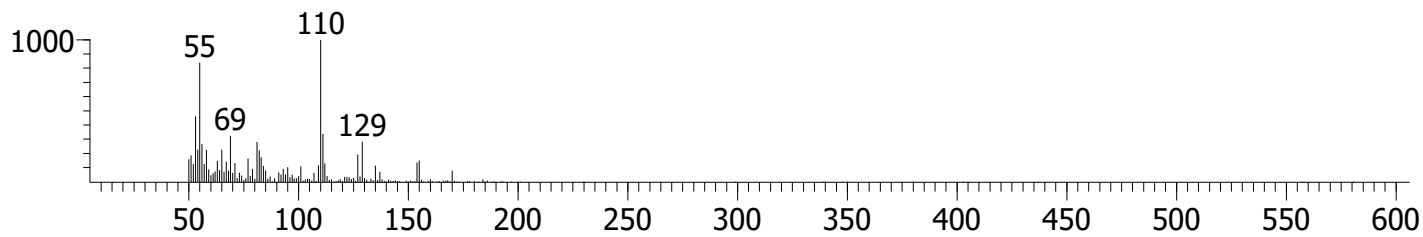

Peak True - sample "INF-C comp 091919 (111419):1", peak 3044, at 1312.52 , 2.204 sec , sec (Spec # 126474)

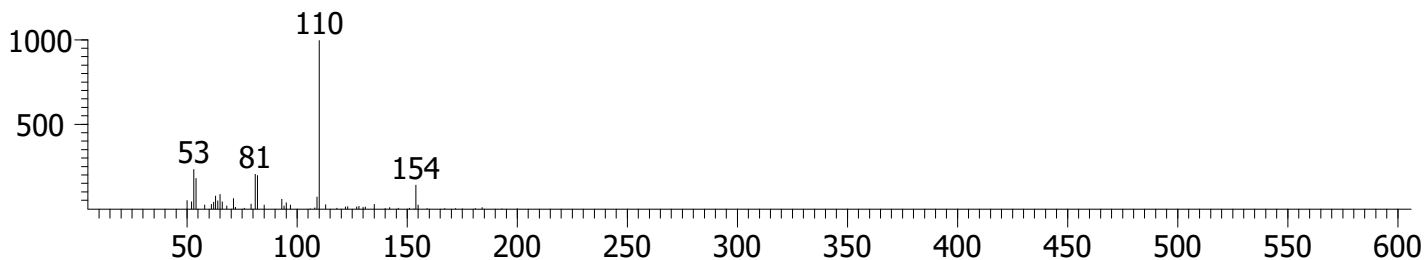

Library Hit - similarity 748, "2-(2-Hydroxyethoxy)phenol"

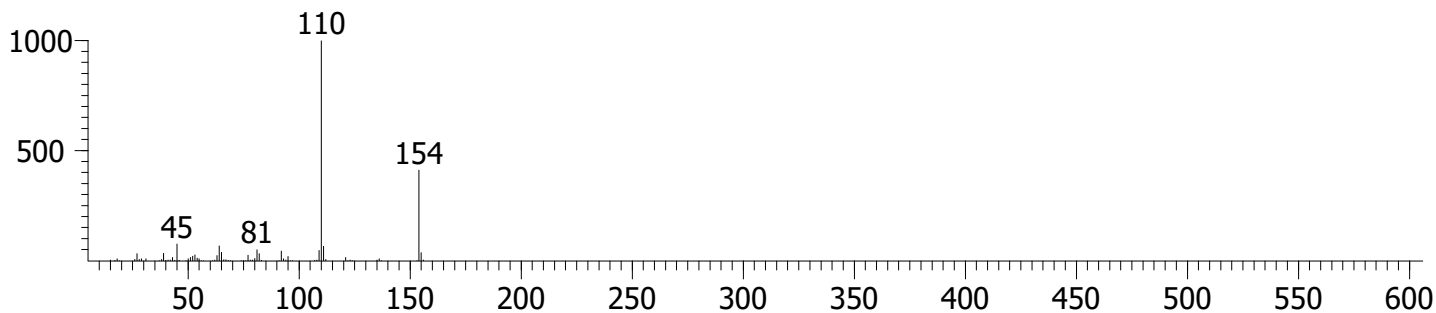

| Hit | Name                                            | Similarity | Probability | CAS        | Library | Formula                                        | Weight |
|-----|-------------------------------------------------|------------|-------------|------------|---------|------------------------------------------------|--------|
| 1   | 2-(2-Hydroxyethoxy)phenol                       | 748        | 3483        | 4792-78-3  | mainlib | C <sub>8</sub> H <sub>10</sub> O <sub>3</sub>  | 154    |
| 2   | 3-Acetyl-4-hydroxyphenyl acetate                | 724        | 1167        | 21222-04-8 | mainlib | C <sub>10</sub> H <sub>10</sub> O <sub>4</sub> | 194    |
| 3   | 2-(2-Hydroxyethoxy)phenol, isopropyl ether      | 712        | 777         | 0-00-0     | mainlib | C <sub>11</sub> H <sub>16</sub> O <sub>3</sub> | 196    |
| 4   | 2-(2-Hydroxyethoxy)phenol, 2-methylpropyl ether | 701        | 533         | 0-00-0     | mainlib | C <sub>12</sub> H <sub>18</sub> O <sub>3</sub> | 210    |
| 5   | 4(1H)-Pyrimidinone, 6-methyl-                   | 693        | 397         | 3524-87-6  | mainlib | C <sub>5</sub> H <sub>6</sub> N <sub>2</sub> O | 110    |

## 7-Hydroxycoumarin

1st Dimension R.T. = 1669.32  
2nd Dimension R.T. = 2.666  
Quant Mass(es) = 134  
S/N = 846.59  
Area = 857281  
Height = 64930  
Similarity = 874

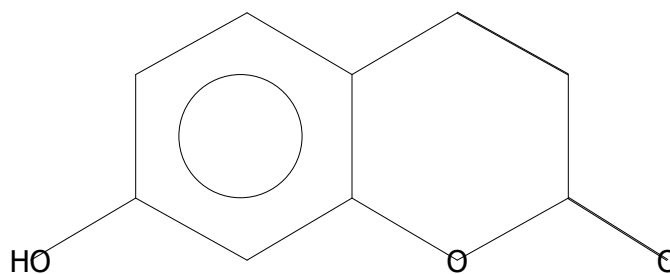

Peak Apex - sample "INF-C comp 091919 (111419):1", peak 5064, at 1669.32 , 2.666 sec , sec (Spec # 180604)

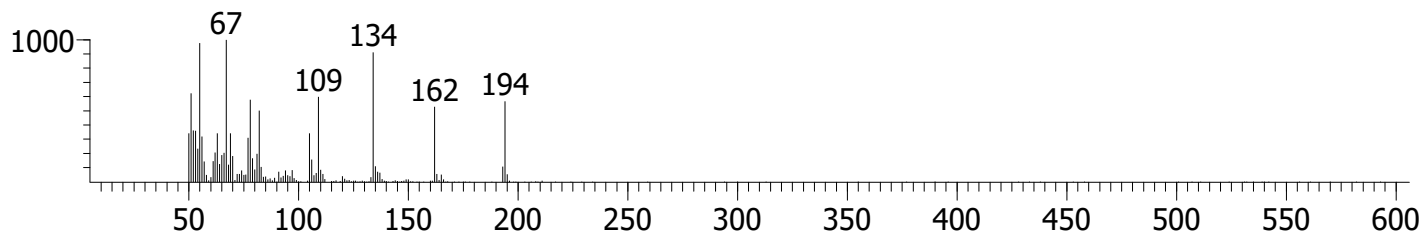

Peak True - sample "INF-C comp 091919 (111419):1", peak 5064, at 1669.32 , 2.666 sec , sec (Spec # 180604)

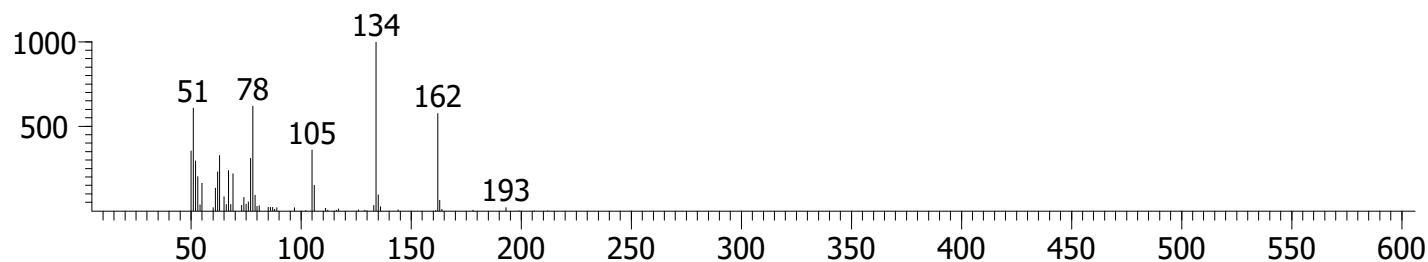

Library Hit - similarity 874, "7-Hydroxycoumarin"

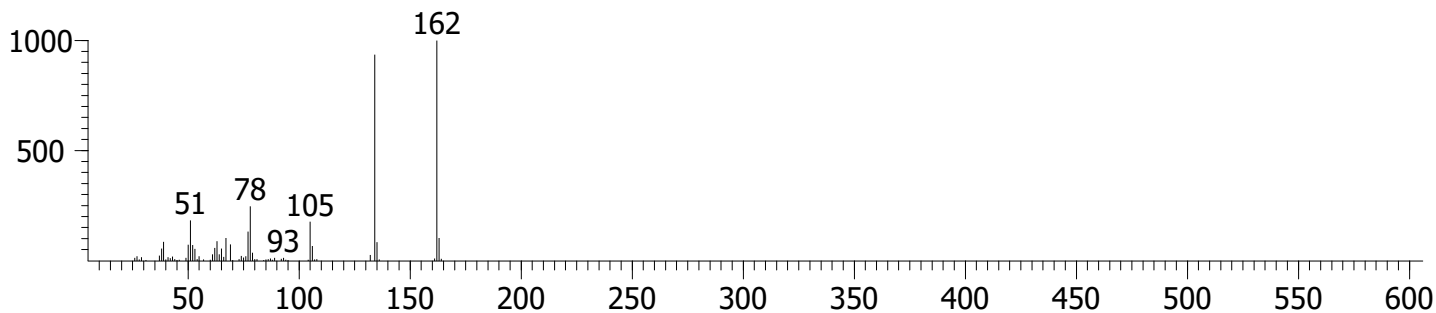

| Hit | Name                                         | Similarity | Probability | CAS        | Library | Formula                                        | Weight |
|-----|----------------------------------------------|------------|-------------|------------|---------|------------------------------------------------|--------|
| 1   | 7-Hydroxycoumarin                            | 874        | 3832        | 93-35-6    | mainlib | C <sub>9</sub> H <sub>6</sub> O <sub>3</sub>   | 162    |
| 2   | 2H-1-Benzopyran-2-one, 8-hydroxy-            | 866        | 2859        | 2442-31-1  | mainlib | C <sub>9</sub> H <sub>6</sub> O <sub>3</sub>   | 162    |
| 3   | 2H-1-Benzopyran-2-one, 6-hydroxy-            | 852        | 1789        | 6093-68-1  | mainlib | C <sub>9</sub> H <sub>6</sub> O <sub>3</sub>   | 162    |
| 4   | 1-Benzofuran-5-ol                            | 814        | 428         | 13196-10-6 | mainlib | C <sub>8</sub> H <sub>6</sub> O <sub>2</sub>   | 134    |
| 5   | 4H-1-Benzopyran-4-one, 2,3-dihydro-6-methyl- | 814        | 428         | 39513-75-2 | mainlib | C <sub>10</sub> H <sub>10</sub> O <sub>2</sub> | 162    |

yltetrasiloxan-2'-yloxy)-2,4,4,6,6,8,8,10,10-n

1st Dimension R.T. = 1791.75  
 2nd Dimension R.T. = 0.990  
 Quant Mass(es) = 221  
 S/N = 3165.0  
 Area = 302419  
 Height = 44688  
 Similarity = 726

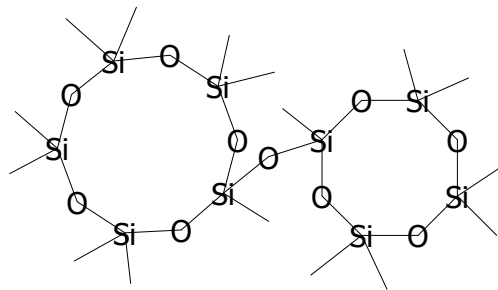

Peak Apex - sample "INF-C comp 091919 (111419):1", peak 5687, at 1791.75 , 0.990 sec , sec (Spec # 198900)

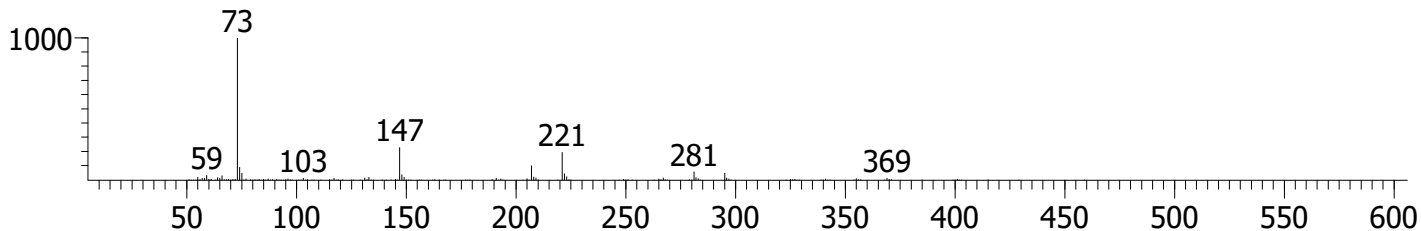

Peak True - sample "INF-C comp 091919 (111419):1", peak 5687, at 1791.75 , 0.990 sec , sec (Spec # 198900)

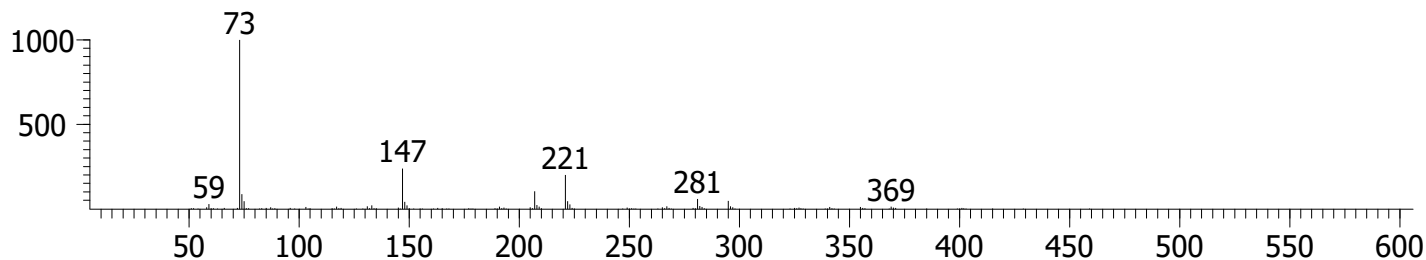

Library Hit - similarity 726, "2-(2',4',4',6',6',8',8'-Heptamethyltetrasiloxan-2'-yloxy)-2,4,4,6,6,8,8,10,10-nonamethylcyclopentasiloxane"

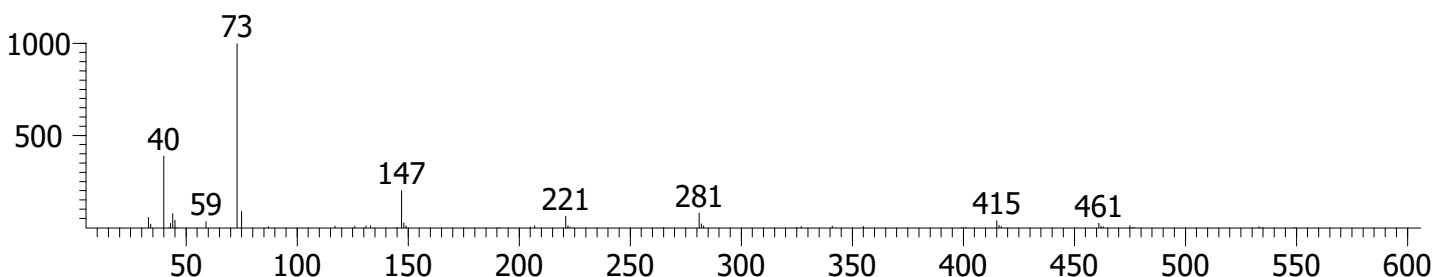

| Hit | Name                                                                                                       | Similarity | Probability | CAS         | Library | Formula       | Weight |
|-----|------------------------------------------------------------------------------------------------------------|------------|-------------|-------------|---------|---------------|--------|
| 1   | 2-(2',4',4',6',6',8',8'-Heptamethyltetrasiloxan-2'-yloxy)-2,4,4,6,6,8,8,10,10-nonamethylcyclopentasiloxane | 726        | 4819        | 145344-72-5 | mainlib | C16H48O10Si9  | 652    |
| 2   | Heptasiloxane, hexadecamethyl-                                                                             | 689        | 1173        | 541-01-5    | mainlib | C16H48O6Si7   | 532    |
| 3   | Mercaptoacetic acid, 2TMS derivative                                                                       | 682        | 898         | 6398-62-5   | mainlib | C8H20O2SSi2   | 236    |
| 4   | Suberohydroxamic acid, tetra(tert.-butyldimethylsilyl) derivative                                          | 669        | 580         | 0-00-0      | mainlib | C32H72N2O4Si4 | 660    |
| 5   | 3,6-Dioxa-2,4,5,7-tetrasilaoctane, 2,2,4,4,5,5,7,7-octamethyl-                                             | 663        | 456         | 4342-25-0   | mainlib | C10H30O2Si4   | 294    |

3-pyridinecarbonitrile,  
2-amino-1,6-dihydro-1,4-dimethyl-6-oxo-

1st Dimension R.T. = 1753.27  
 2nd Dimension R.T. = 2.574  
 Quant Mass(es) = 134  
 S/N = 322.86  
 Area = 80134  
 Height = 7459.1  
 Similarity = 698

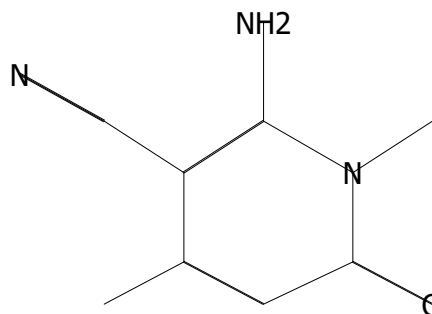

Peak Apex - sample "INF-A grab 100819 (111419):1", peak 3949, at 1753.27 , 2.574 sec , sec (Spec # 193310)

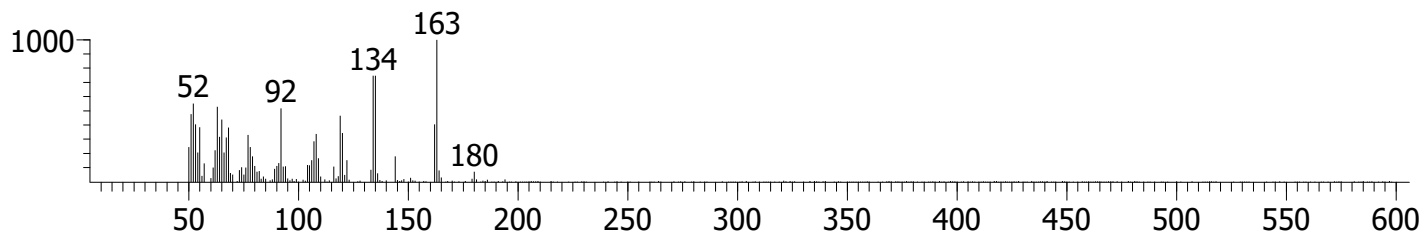

Peak True - sample "INF-A grab 100819 (111419):1", peak 3949, at 1753.27 , 2.574 sec , sec (Spec # 193310)

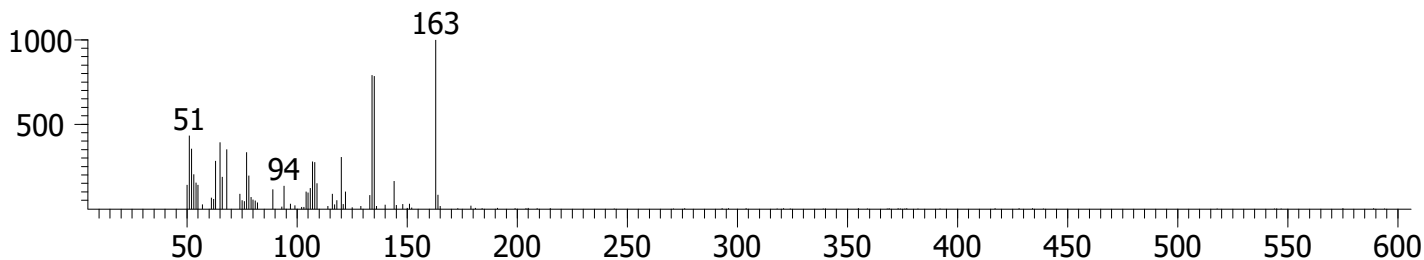

Library Hit - similarity 698, "3-pyridinecarbonitrile, 2-amino-1,6-dihydro-1,4-dimethyl-6-oxo-"

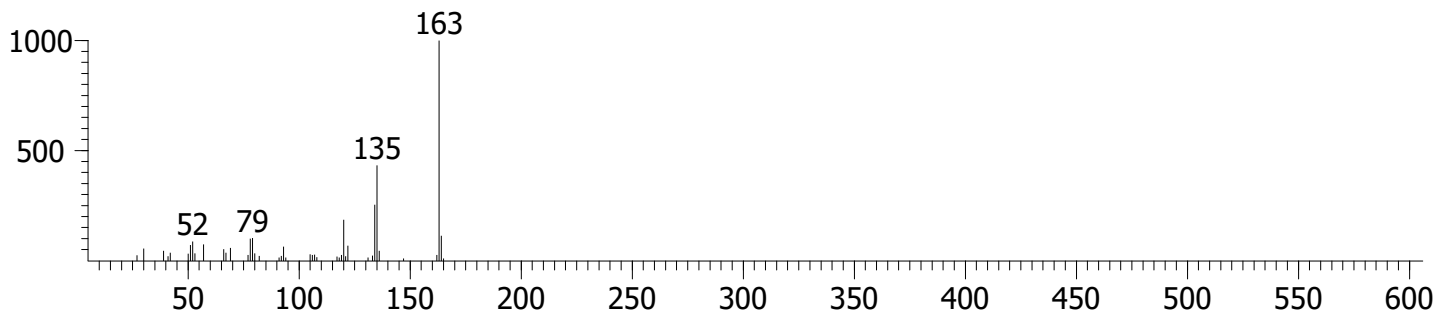

| Hit | Name                                                            | Similarity | Probability | CAS        | Library | Formula | Weight |
|-----|-----------------------------------------------------------------|------------|-------------|------------|---------|---------|--------|
| 1   | 3-pyridinecarbonitrile, 2-amino-1,6-dihydro-1,4-dimethyl-6-oxo- | 698        | 2102        | 0-00-0     | mainlib | C8H9N3O | 163    |
| 2   | 2,3-Dihydro-4-methoxyindole-2-one                               | 687        | 1442        | 7699-17-4  | mainlib | C9H9NO2 | 163    |
| 3   | 1H-Tetrazole, 5-(1,5-dimethyl-1H-pyrrol-2-yl)-                  | 670        | 787         | 0-00-0     | mainlib | C7H9N5  | 163    |
| 4   | 1-Amino-4,6-dimethyl-2-oxo-1,2-dihydropyridine-3-carbonitrile   | 670        | 787         | 1562-12-5  | mainlib | C8H9N3O | 163    |
| 5   | 2,3-Dihydro-7-methyl-1,4-benzoxazine-3-one                      | 667        | 695         | 39522-25-3 | mainlib | C9H9NO2 | 163    |

2,5-Piperazinedione,  
3,6-bis(2-methylpropyl)-

1st Dimension R.T. = 1742.78  
2nd Dimension R.T. = 2.237  
Quant Mass(es) = 170  
S/N = 1453.7  
Area = 205628  
Height = 19404  
Similarity = 813

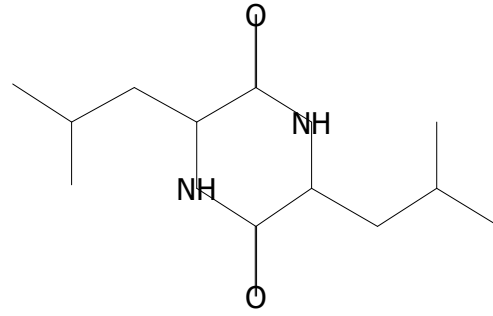

Peak Apex - sample "INF C grab 091919 (20191511):1", peak 3045, at 1742.78 , 2.237 sec , sec (Spec # 191669)

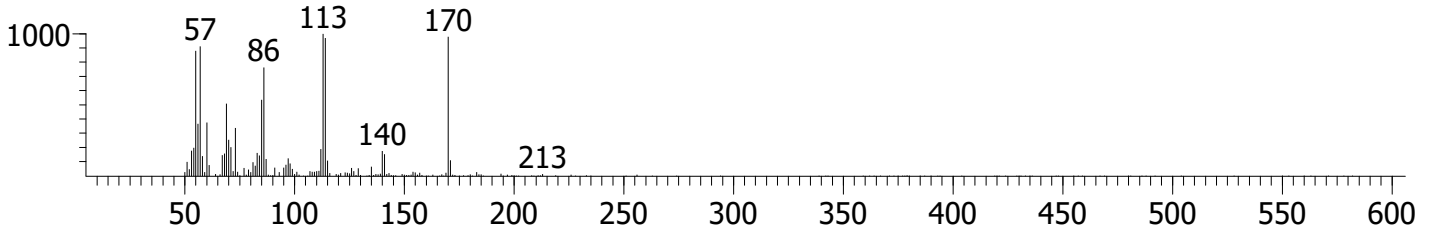

Peak True - sample "INF C grab 091919 (20191511):1", peak 3045, at 1742.78 , 2.237 sec , sec (Spec # 191669)

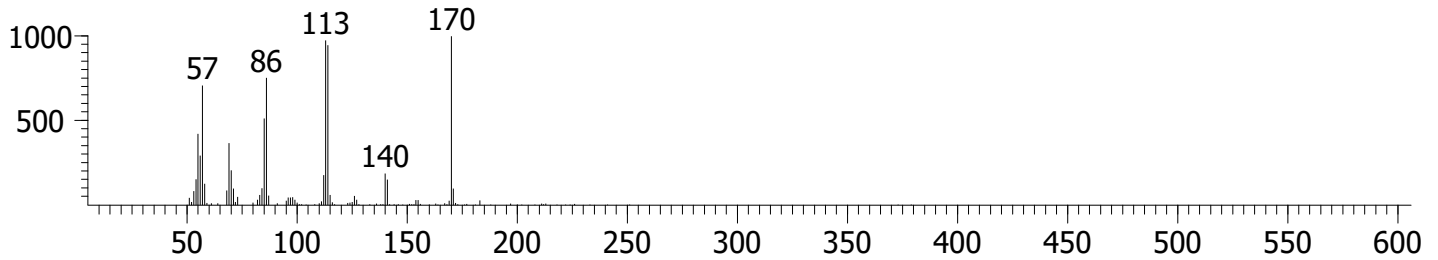

Library Hit - similarity 813, "2,5-Piperazinedione, 3,6-bis(2-methylpropyl)-"

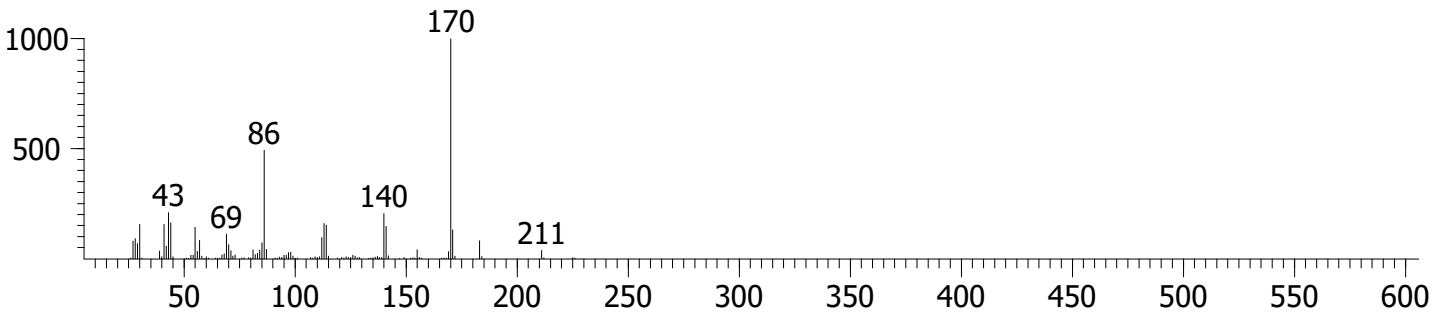

| Hit | Name                                          | Similarity | Probability | CAS        | Library | Formula    | Weight |
|-----|-----------------------------------------------|------------|-------------|------------|---------|------------|--------|
| 1   | 2,5-Piperazinedione, 3,6-bis(2-methylpropyl)- | 813        | 8614        | 1436-27-7  | mainlib | C12H22N2O2 | 226    |
| 2   | 2,5-Piperazinedione, 3,6-bis(2-methylpropyl)- | 769        | 8908        | 1436-27-7  | replib  | C12H22N2O2 | 226    |
| 3   | l-Leucyl-d-leucine                            | 666        | 251         | 17665-02-0 | mainlib | C12H24N2O3 | 244    |
| 4   | 2-(tert-Butylamino)ethyl methacrylate         | 654        | 167         | 3775-90-4  | mainlib | C10H19NO2  | 185    |
| 5   | Itaconic acid diethyl ester                   | 638        | 96          | 2409-52-1  | mainlib | C9H14O4    | 186    |

# Thiophene, 2-formyl-2,3-dihydro-

1st Dimension R.T. = 696.876  
2nd Dimension R.T. = 1.775  
Quant Mass(es) = 113  
S/N = 320.15  
Area = 47686  
Height = 5970.8  
Similarity = 814

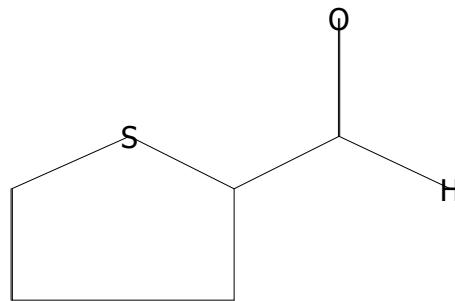

Peak Apex - sample "INF B Comp 091919 (20191122):1", peak 569, at 696.876 , 1.775 sec , sec (Spec # 33129)

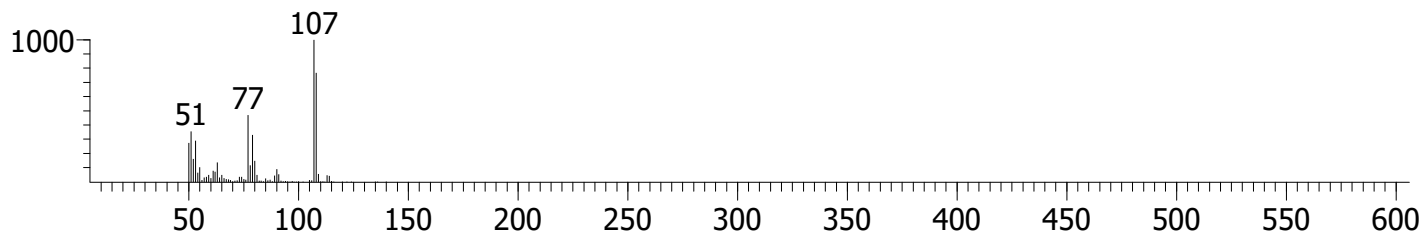

Peak True - sample "INF B Comp 091919 (20191122):1", peak 569, at 696.876 , 1.775 sec , sec (Spec # 33129)

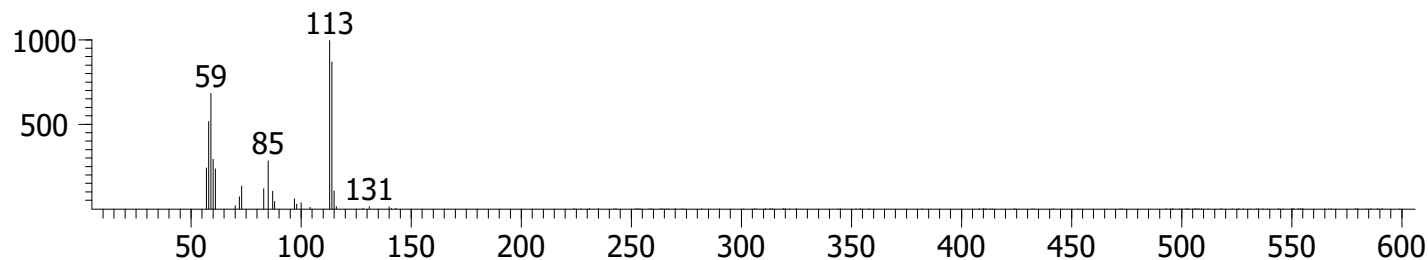

Library Hit - similarity 814, "Thiophene, 2-formyl-2,3-dihydro-"

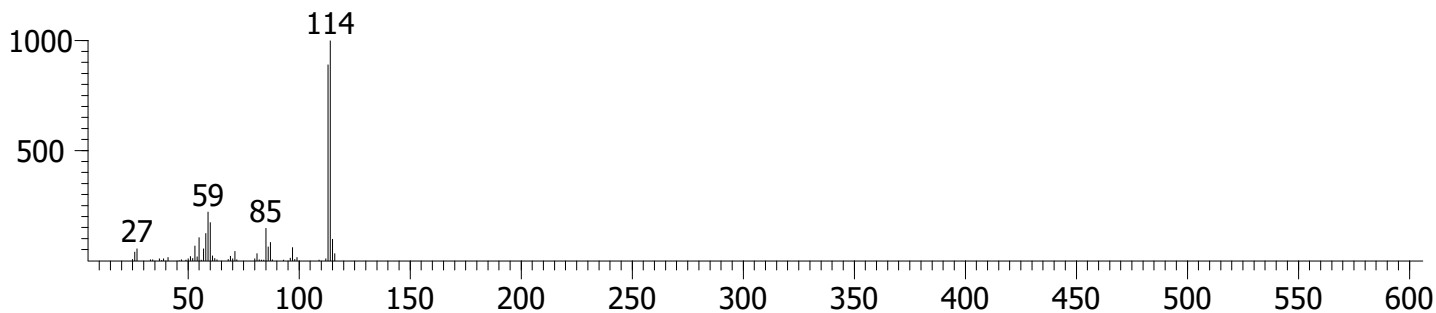

| Hit | Name                                 | Similarity | Probability | CAS         | Library | Formula   | Weight |
|-----|--------------------------------------|------------|-------------|-------------|---------|-----------|--------|
| 1   | Thiophene, 2-formyl-2,3-dihydro-     | 814        | 8845        | 290354-70-0 | mainlib | C5H6OS    | 114    |
| 2   | 1-Butoxypropan-2-yl heptanoate       | 700        | 537         | 0-00-0      | mainlib | C14H28O3  | 244    |
| 3   | Glycyl-D-valine                      | 652        | 111         | 10521-49-0  | mainlib | C7H14N2O3 | 174    |
| 4   | Silane, 1-butenyltrimethyl-          | 650        | 102         | 18291-95-7  | mainlib | C7H16Si   | 128    |
| 5   | 1-(2-methyl-3-furylthio)-ethanethiol | 646        | 86          | 0-00-0      | mainlib | C7H10OS2  | 174    |

## 4-Methyl-1,2,3-trithiolane

1st Dimension R.T. = 815.808  
2nd Dimension R.T. = 2.132  
Quant Mass(es) = 138  
S/N = 140.73  
Area = 29924  
Height = 3779.7  
Similarity = 811

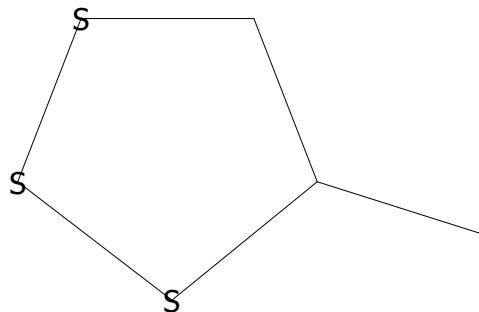

Peak Apex - sample "INF-C comp 091919 (111419):1", peak 904, at 815.808 , 2.132 sec , sec (Spec # 51203)

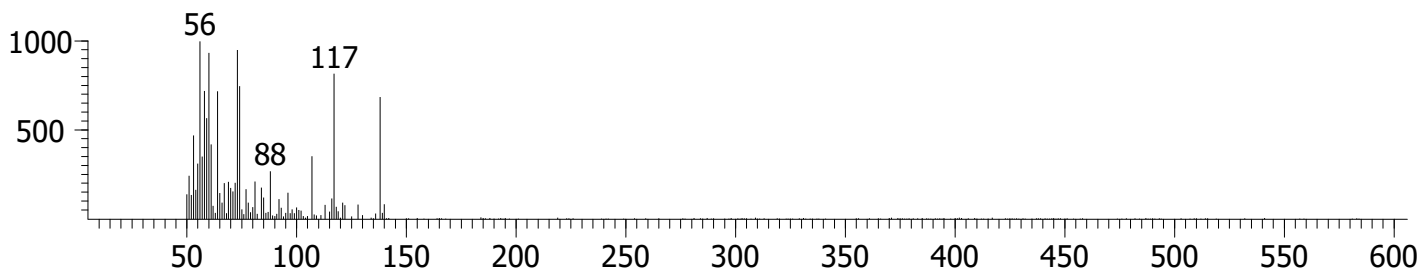

Peak True - sample "INF-C comp 091919 (111419):1", peak 904, at 815.808 , 2.132 sec , sec (Spec # 51203)

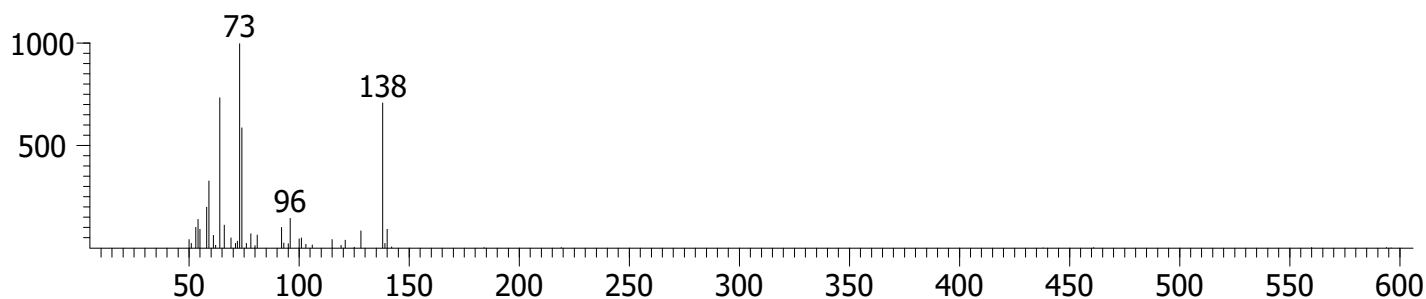

Library Hit - similarity 811, "4-Methyl-1,2,3-trithiolane"

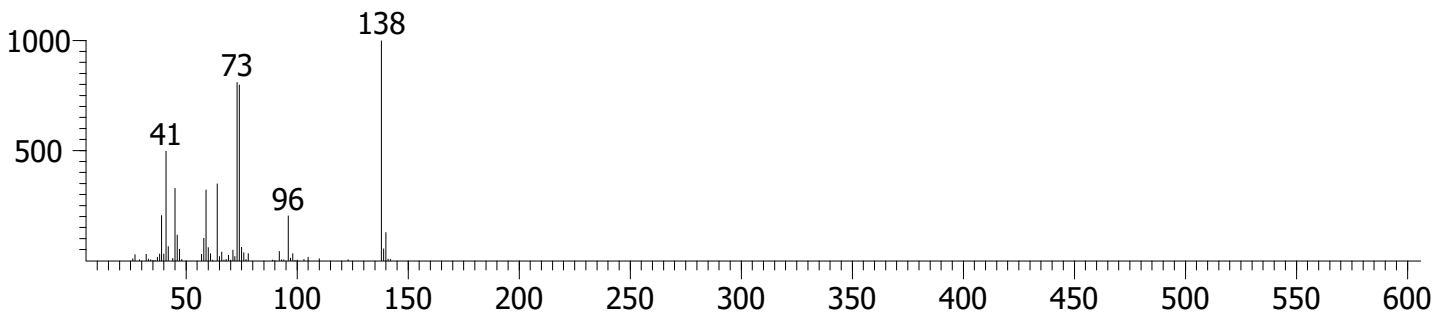

| Hit | Name                                                                      | Similarity | Probability | CAS         | Library | Formula  | Weight |
|-----|---------------------------------------------------------------------------|------------|-------------|-------------|---------|----------|--------|
| 1   | 4-Methyl-1,2,3-trithiolane                                                | 811        | 9345        | 116664-29-0 | mainlib | C3H6S3   | 138    |
| 2   | 1,2-Dithiolane, 1,1-dioxide                                               | 691        | 490         | 18321-16-9  | mainlib | C3H6O2S2 | 138    |
| 3   | 4,6-Diethyl-1,2,3,5-tetrathiolane                                         | 587        | 34          | 0-00-0      | mainlib | C6H12S4  | 212    |
| 4   | 1,3,5-Trithiane                                                           | 586        | 32          | 291-21-4    | mainlib | C3H6S3   | 138    |
| 5   | 1,4:5,8-dimethano-naphthalene,1,2,4,4a,8,8,8a-octahydro-2-trimethylsilyl- | 583        | 28          | 0-00-0      | mainlib | C15H24Si | 232    |



## Benzofuran, 4,7-dimethyl-

1st Dimension R.T. = 889.266  
2nd Dimension R.T. = 1.696  
Quant Mass(es) = 146  
S/N = 1723.1  
Area = 188888  
Height = 26164  
Similarity = 839

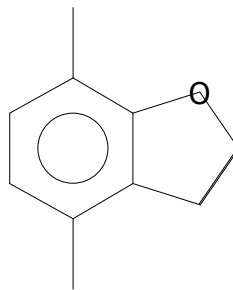

Peak Apex - sample "INF-C comp 091919 (111419):1", peak 1177, at 889.266 , 1.696 sec , sec (Spec # 62267)

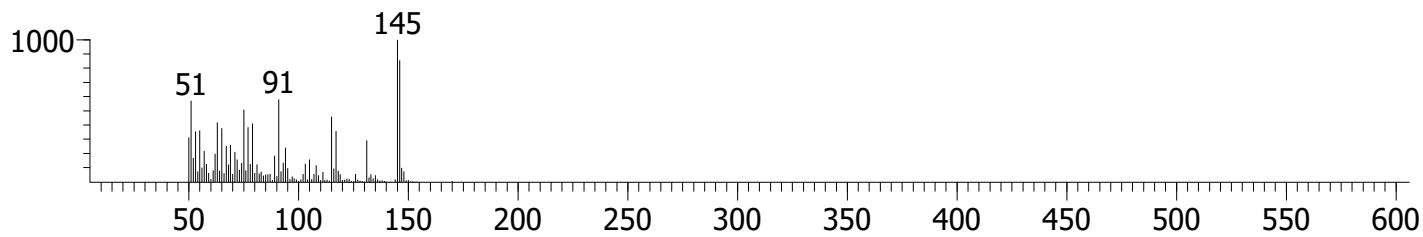

Peak True - sample "INF-C comp 091919 (111419):1", peak 1177, at 889.266 , 1.696 sec , sec (Spec # 62267)

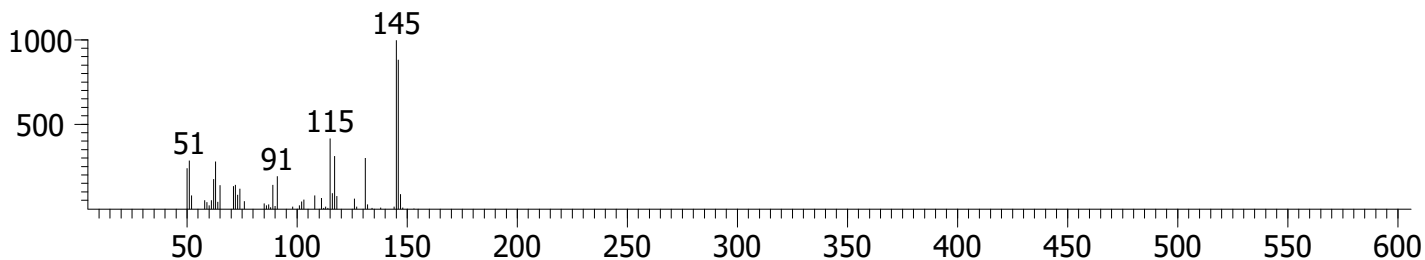

Library Hit - similarity 839, "Benzofuran, 4,7-dimethyl-"

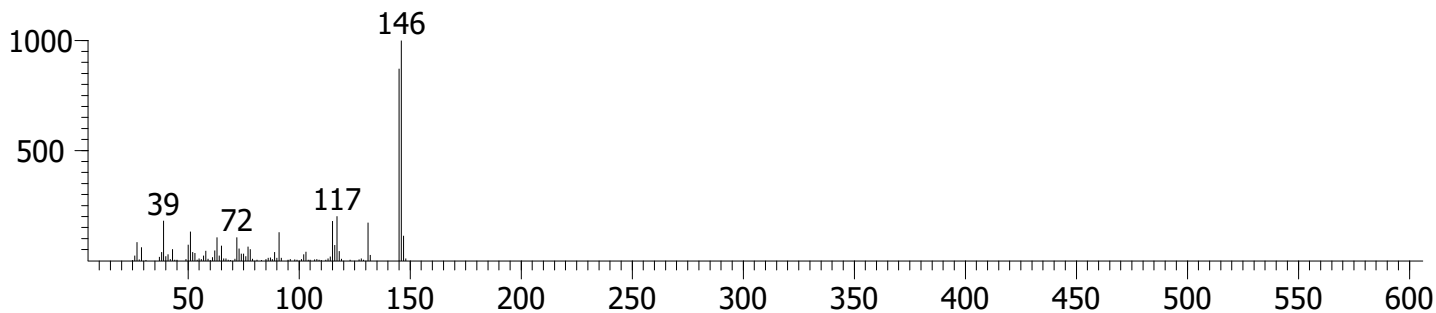

| Hit | Name                                     | Similarity | Probability | CAS        | Library | Formula | Weight |
|-----|------------------------------------------|------------|-------------|------------|---------|---------|--------|
| 1   | Benzofuran, 4,7-dimethyl-                | 839        | 6901        | 28715-26-6 | mainlib | C10H10O | 146    |
| 2   | Cinnamaldehyde, $\alpha$ -methyl-        | 794        | 1469        | 1196-67-4  | mainlib | C10H10O | 146    |
| 3   | 1H-Indene-4-carboxaldehyde, 2,3-dihydro- | 756        | 352         | 51932-70-8 | mainlib | C10H10O | 146    |
| 4   | 2-Propenal, 2-methyl-3-phenyl-           | 752        | 297         | 101-39-3   | mainlib | C10H10O | 146    |
| 5   | 2,3-Dimethyl-1H-pyrrolo[2,3-b]pyridine   | 730        | 117         | 10299-69-1 | mainlib | C9H10N2 | 146    |

# Phenol, 4-(2-propenyl)-

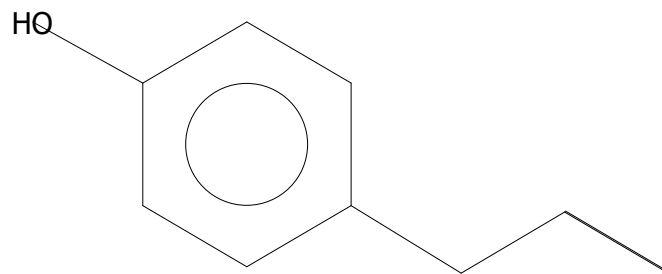

1st Dimension R.T. = 945.234

2nd Dimension R.T. = 1.789

Quant Mass(es) = 134

S/N = 858.62

Area = 92265

Height = 11809

Similarity = 824

Peak Apex - sample "INF B Comp 091919 (20191122):1", peak 1567, at 945.234 , 1.789 sec , sec (Spec # 70761)

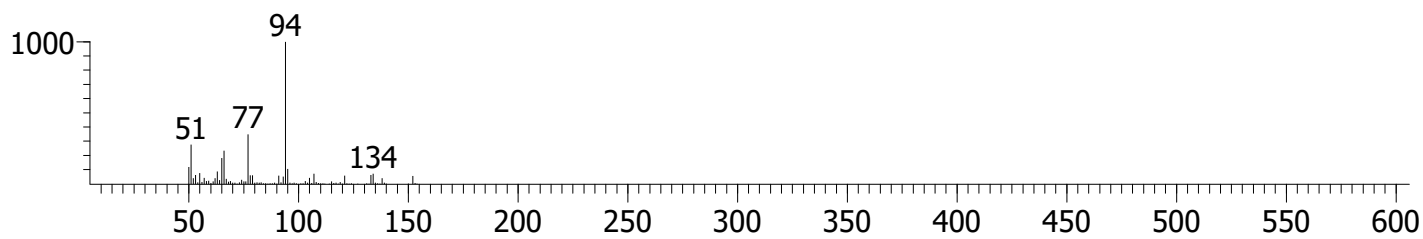

Peak True - sample "INF B Comp 091919 (20191122):1", peak 1567, at 945.234 , 1.789 sec , sec (Spec # 70761)

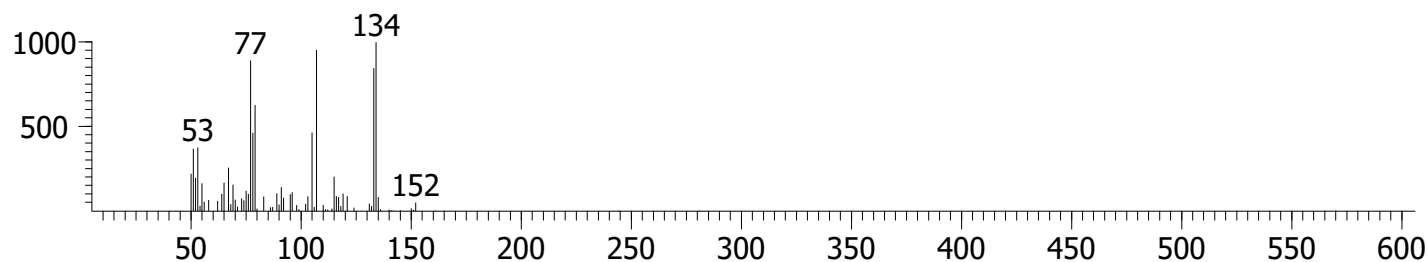

Library Hit - similarity 824, "Phenol, 4-(2-propenyl)-"

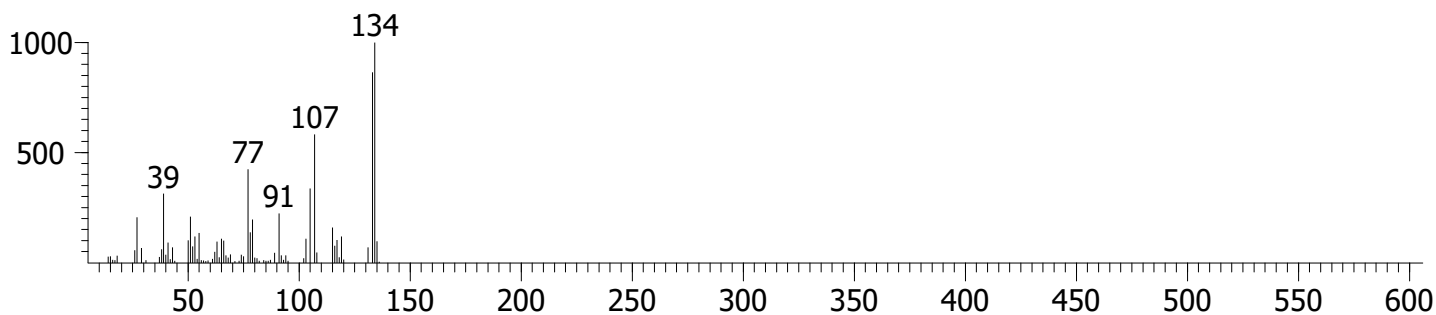

| Hit | Name                                          | Similarity | Probability | CAS          | Library | Formula  | Weight |
|-----|-----------------------------------------------|------------|-------------|--------------|---------|----------|--------|
| 1   | Phenol, 4-(2-propenyl)-                       | 824        | 6909        | 501-92-8     | mainlib | C9H10O   | 134    |
| 2   | 3-(1-Cyclopentenyl)furan                      | 743        | 732         | 115754-79-5  | mainlib | C9H10O   | 134    |
| 3   | Phenol, 4-(2-propenyl)-, acetate              | 722        | 311         | 61499-22-7   | mainlib | C11H12O2 | 176    |
| 4   | 6-APDB                                        | 716        | 244         | 1281872-58-9 | mainlib | C11H15NO | 177    |
| 5   | 1-(3-Methyl-2-butenoxy)-4-(1-propenyl)benzene | 709        | 187         | 78259-41-3   | mainlib | C14H18O  | 202    |

Bicyclo[3.3.1]nonan-2-one,  
1-methyl-9-(1-methylethylidene)-

1st Dimension R.T. = 983.712  
 2nd Dimension R.T. = 1.498  
 Quant Mass(es) = 192  
 S/N = 259.60  
 Area = 19049  
 Height = 2735.4  
 Similarity = 747

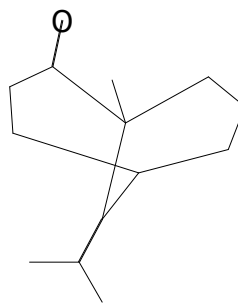

Peak Apex - sample "INF B Comp 091919 (20191122):1", peak 1739, at 983.712 , 1.498 sec , sec (Spec # 76 547)

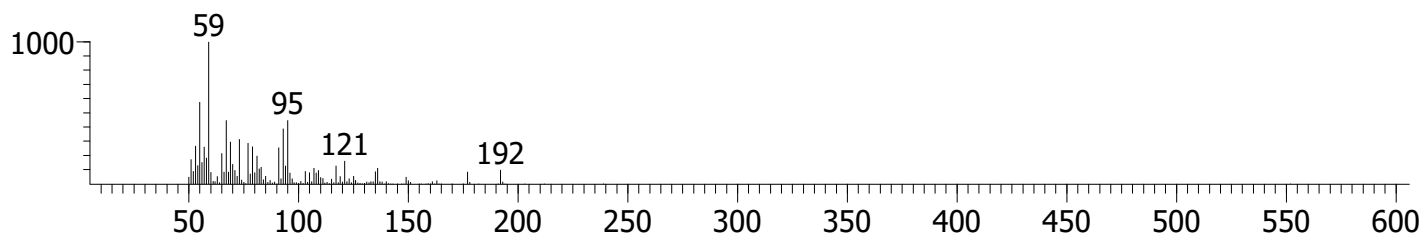

Peak True - sample "INF B Comp 091919 (20191122):1", peak 1739, at 983.712 , 1.498 sec , sec (Spec # 765 47)

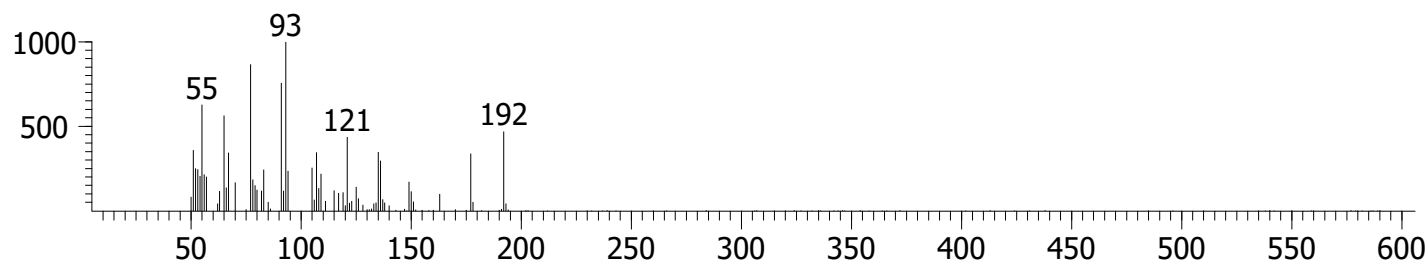

Library Hit - similarity 747, "Bicyclo[3.3.1]nonan-2-one, 1-methyl-9-(1-methylethylidene)-"

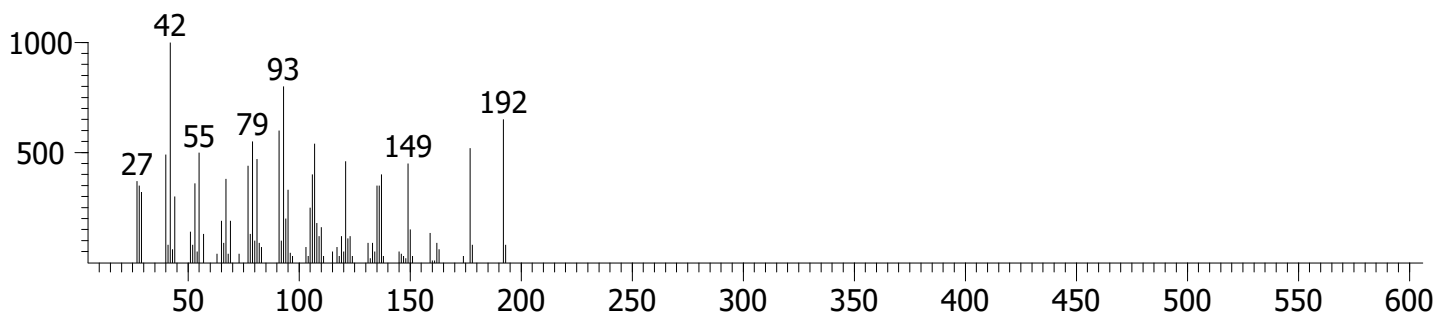

| Hit | Name                                                                | Similarity | Probability | CAS         | Library | Formula | Weight |
|-----|---------------------------------------------------------------------|------------|-------------|-------------|---------|---------|--------|
| 1   | Bicyclo[3.3.1]nonan-2-one, 1-methyl-9-(1-methylethylidene)-         | 747        | 2786        | 56630-95-6  | mainlib | C13H20O | 192    |
| 2   | (1R,2R,5R,E)-7-Ethylidene-1,2,8,8-tetramethylbicyclo[3.2.1]octane   | 722        | 849         | 193695-14-6 | mainlib | C14H24  | 192    |
| 3   | 2(3H)-Naphthalenone, 4,4a,5,6,7,8-hexahydro-4a,7,7-trimethyl-, (R)- | 719        | 751         | 55123-72-3  | mainlib | C13H20O | 192    |
| 4   | Ionone                                                              | 717        | 692         | 8013-90-9   | mainlib | C13H20O | 192    |
| 5   | 2(1H)-Naphthalenone, 3,4,4a,5,6,7-hexahydro-1,1,4a-trimethyl-       | 713        | 585         | 4668-61-5   | mainlib | C13H20O | 192    |

## Resorcinol

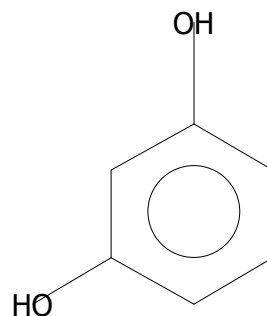

1st Dimension R.T. = 1029.19

2nd Dimension R.T. = 1.973

Quant Mass(es) = 110

S/N = 73.311

Area = 1152973

Height = 60605

Similarity = 740

Peak Apex - sample "INF B Comp 091919 (20191122):1", peak 1962, at 1029.19 , 1.973 sec , sec (Spec # 83509)

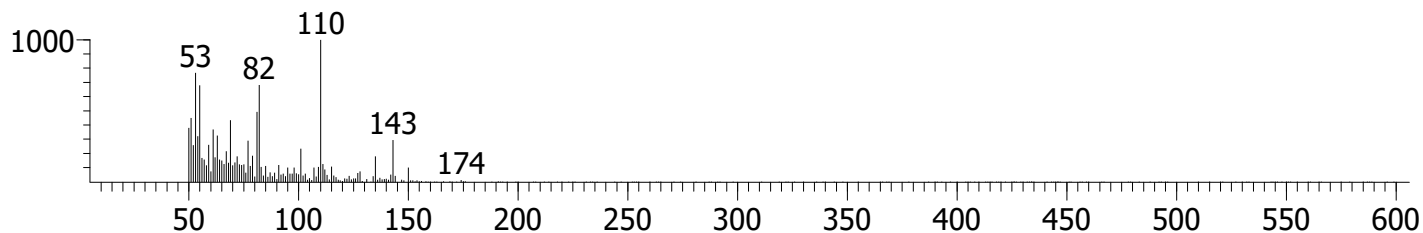

Peak True - sample "INF B Comp 091919 (20191122):1", peak 1962, at 1029.19 , 1.973 sec , sec (Spec # 83509)

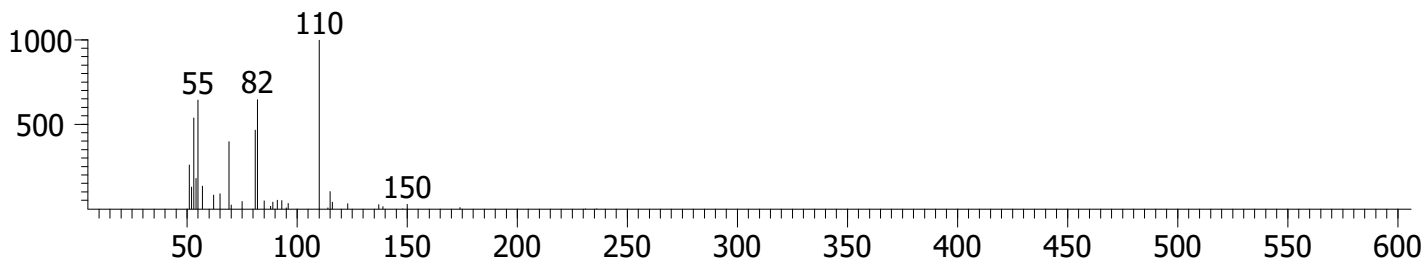

Library Hit - similarity 740, "Resorcinol"

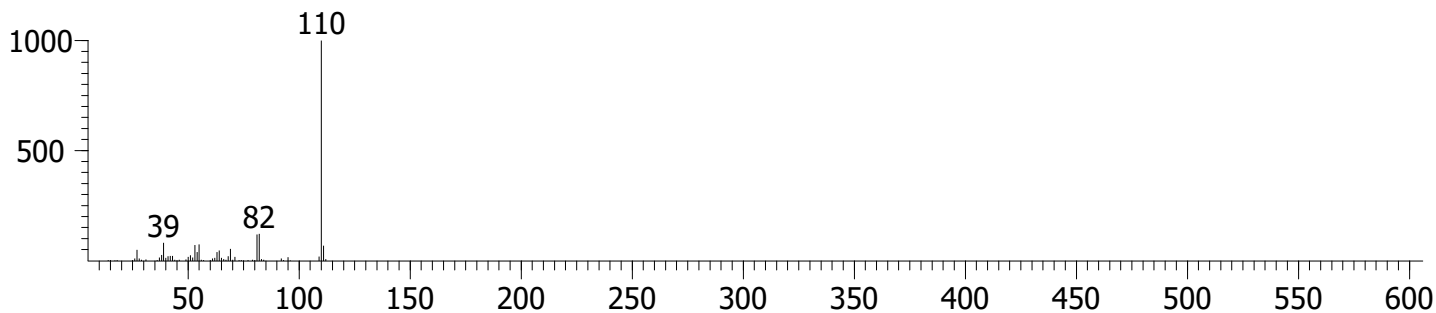

| Hit | Name                                            | Similarity | Probability | CAS        | Library | Formula   | Weight |
|-----|-------------------------------------------------|------------|-------------|------------|---------|-----------|--------|
| 1   | Resorcinol                                      | 740        | 4702        | 108-46-3   | mainlib | C6H6O2    | 110    |
| 2   | 4(1H)-Pyrimidinone, 6-methyl-                   | 703        | 1144        | 3524-87-6  | mainlib | C5H6N2O   | 110    |
| 3   | 4-(4-Methyl-[1,3,2]dioxaborinan-2-yloxy)-phenol | 695        | 853         | 0-00-0     | mainlib | C10H13BO4 | 208    |
| 4   | 2(1H)-Pyrimidinone, 5-methyl-                   | 681        | 534         | 41398-85-0 | mainlib | C5H6N2O   | 110    |
| 5   | Resorcinol monoacetate                          | 668        | 345         | 102-29-4   | mainlib | C8H8O3    | 152    |

## 2-Methoxyresorcinol

1st Dimension R.T. = 1123.63  
2nd Dimension R.T. = 2.086  
Quant Mass(es) = 125  
S/N = 949.97  
Area = 376130  
Height = 33557  
Similarity = 824

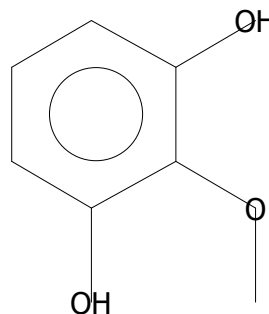

Peak Apex - sample "INF B Comp 091919 (20191122):1", peak 2443, at 1123.63 , 2.086 sec , sec (Spec # 97836)

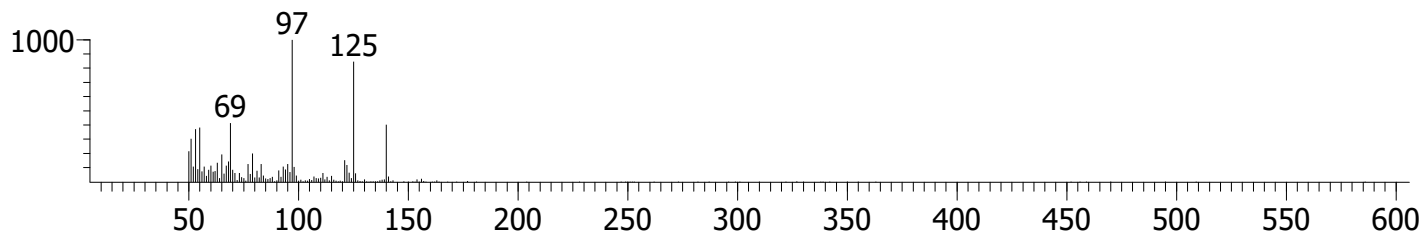

Peak True - sample "INF B Comp 091919 (20191122):1", peak 2443, at 1123.63 , 2.086 sec , sec (Spec # 97836)

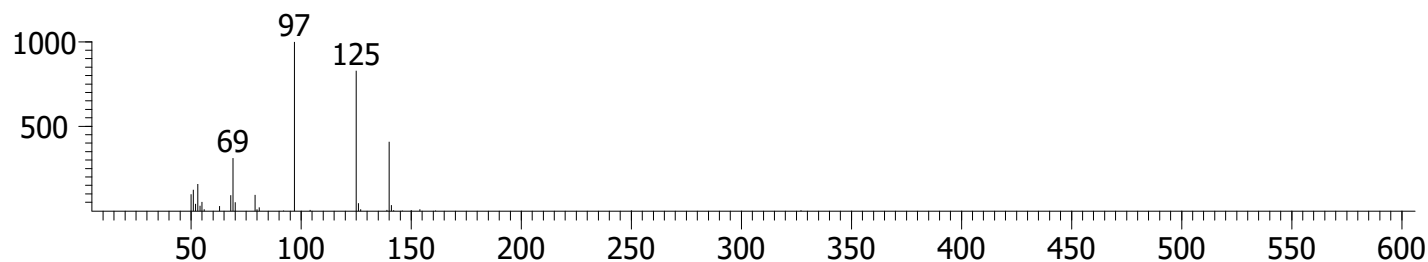

Library Hit - similarity 824, "2-Methoxyresorcinol"

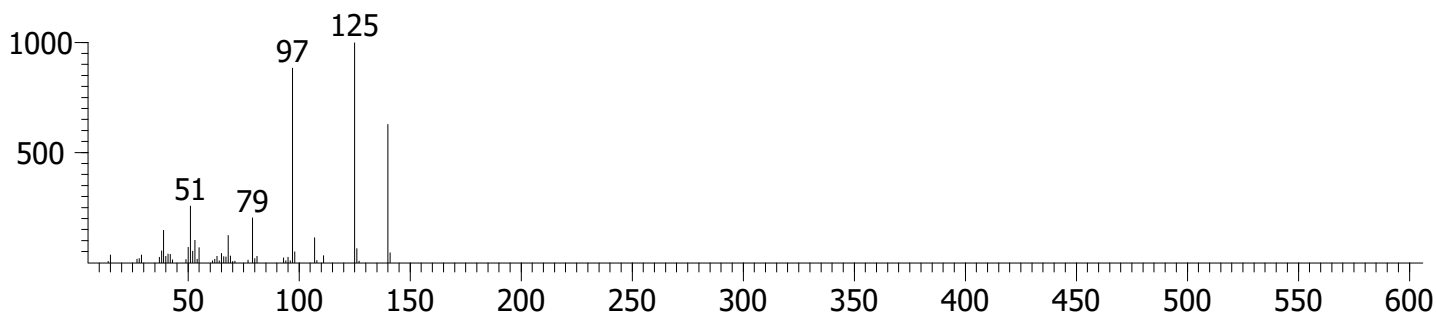

| Hit | Name                        | Similarity | Probability | CAS        | Library | Formula                                       | Weight |
|-----|-----------------------------|------------|-------------|------------|---------|-----------------------------------------------|--------|
| 1   | 2-Methoxyresorcinol         | 824        | 5354        | 29267-67-2 | mainlib | C <sub>7</sub> H <sub>8</sub> O <sub>3</sub>  | 140    |
| 2   | 1,4-Benzenediol, 2-methoxy- | 800        | 1794        | 824-46-4   | mainlib | C <sub>7</sub> H <sub>8</sub> O <sub>3</sub>  | 140    |
| 3   | 5-Acetyl-2-furanmethanol    | 796        | 1515        | 55087-82-6 | mainlib | C <sub>7</sub> H <sub>8</sub> O <sub>3</sub>  | 140    |
| 4   | Cyclohexanone, 2-acetyl-    | 756        | 351         | 874-23-7   | mainlib | C <sub>8</sub> H <sub>12</sub> O <sub>2</sub> | 140    |
| 5   | 1,2-Benzenediol, 3-methoxy- | 746        | 248         | 934-00-9   | mainlib | C <sub>7</sub> H <sub>8</sub> O <sub>3</sub>  | 140    |

# Benzene, 1-heptenyl-

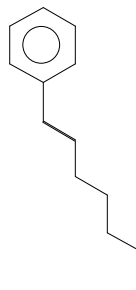

1st Dimension R.T. = 1176.1  
2nd Dimension R.T. = 1.525  
Quant Mass(es) = 104  
S/N = 483.67  
Area = 60602  
Height = 8512.3  
Similarity = 767

Peak Apex - sample "INF B Comp 091919 (20191122):1", peak 2704, at 1176.1 , 1.525 sec , sec (Spec # 105701)

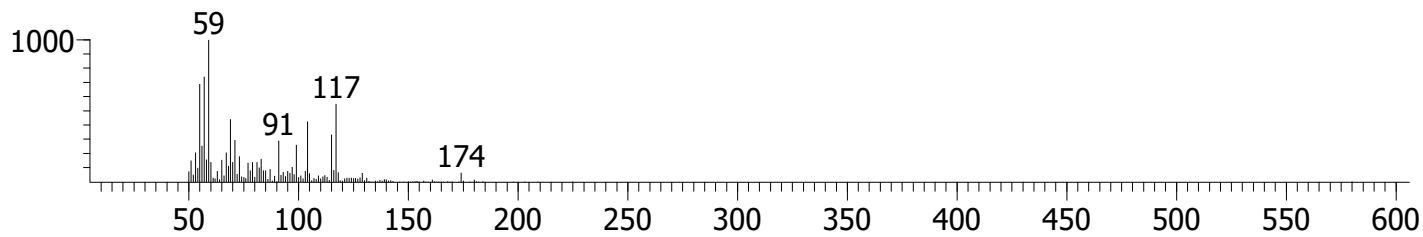

Peak True - sample "INF B Comp 091919 (20191122):1", peak 2704, at 1176.1 , 1.525 sec , sec (Spec # 105701)

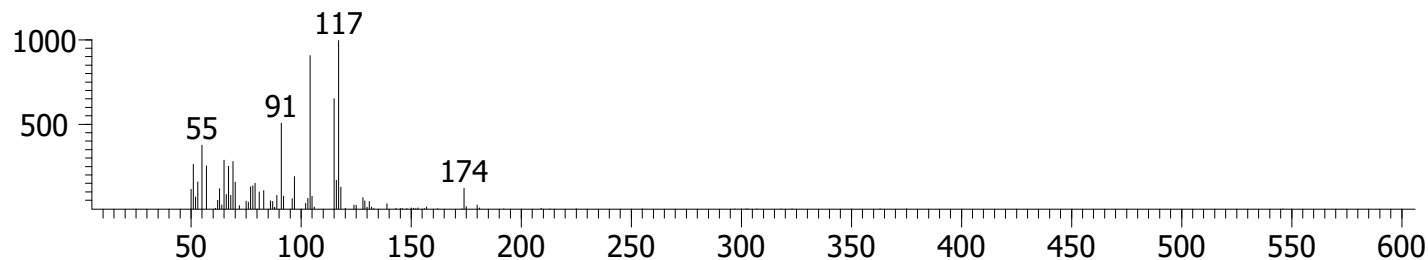

Library Hit - similarity 767, "Benzene, 1-heptenyl-"

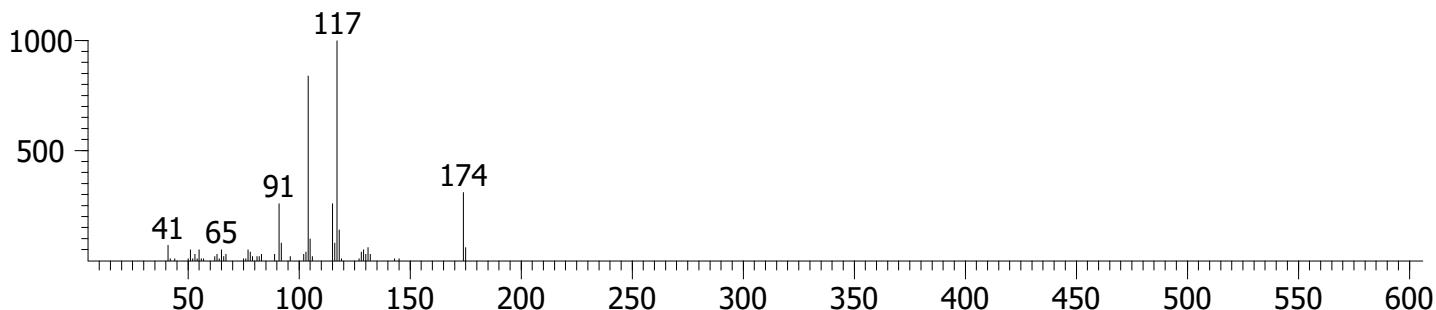

| Hit | Name                                                                  | Similarity | Probability | CAS        | Library | Formula  | Weight |
|-----|-----------------------------------------------------------------------|------------|-------------|------------|---------|----------|--------|
| 1   | Benzene, 1-heptenyl-                                                  | 767        | 3672        | 829-99-2   | mainlib | C13H18   | 174    |
| 2   | Benzene, 2-heptenyl-                                                  | 743        | 1230        | 26447-63-2 | mainlib | C13H18   | 174    |
| 3   | Benzene, 2-heptenyl-, (Z)-                                            | 739        | 1039        | 54725-18-7 | mainlib | C13H18   | 174    |
| 4   | 1,11-Dimethyltricyclo[9.2.2.14,8]hexadeca-4,6,8(16)triene-12,14-dione | 734        | 837         | 0-00-0     | mainlib | C18H22O2 | 270    |
| 5   | Benzene, (5-methyl-1-hexenyl)-                                        | 715        | 406         | 86761-76-4 | mainlib | C13H18   | 174    |

## 4-(2,6,6-Trimethylcyclohexa-1,3-dienyl)but-3-en-2-one

1st Dimension R.T. = 1242.56

2nd Dimension R.T. = 1.690

Quant Mass(es) = 175

S/N = 233.33

Area = 18666

Height = 2282.7

Similarity = 801

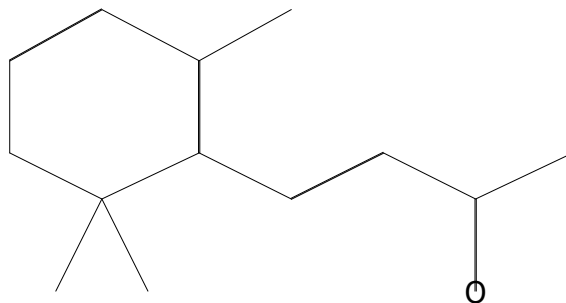

Peak Apex - sample "INF B Comp 091919 (20191122):1", peak 3090, at 1242.56 , 1.690 sec , sec (Spec # 115796)

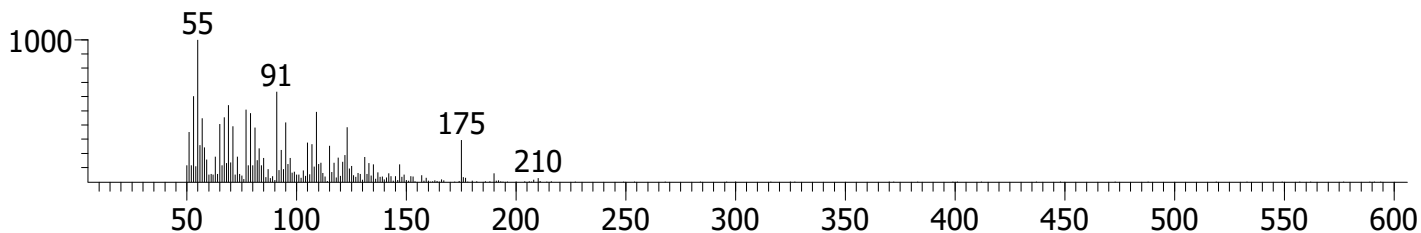

Peak True - sample "INF B Comp 091919 (20191122):1", peak 3090, at 1242.56 , 1.690 sec , sec (Spec # 115796)

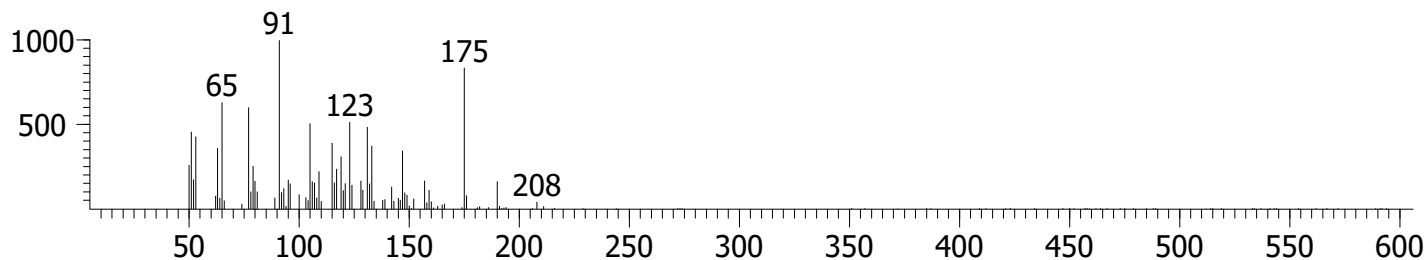

Library Hit - similarity 801, "4-(2,6,6-Trimethylcyclohexa-1,3-dienyl)but-3-en-2-one"

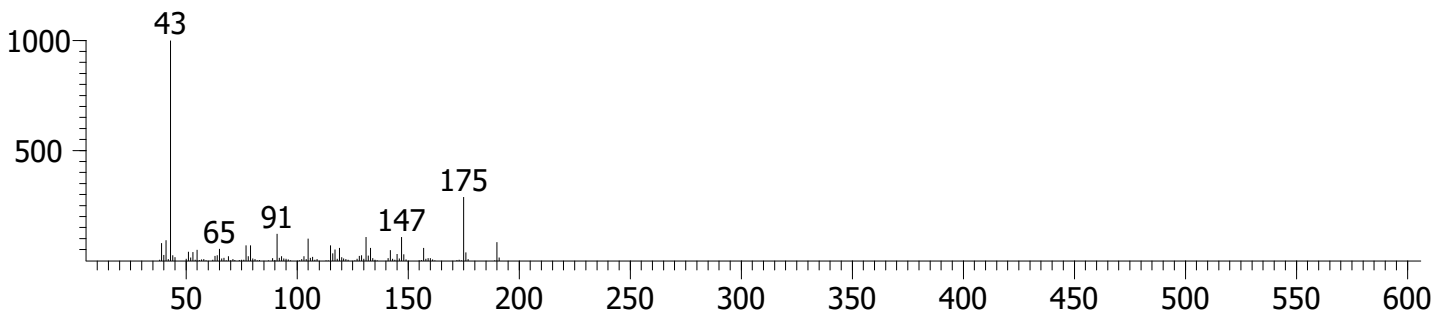

| Hit | Name                                                         | Similarity | Probability | CAS        | Library | Formula | Weight |
|-----|--------------------------------------------------------------|------------|-------------|------------|---------|---------|--------|
| 1   | 4-(2,6,6-Trimethylcyclohexa-1,3-dienyl)but-3-en-2-one        | 801        | 6274        | 1203-08-3  | mainlib | C13H18O | 190    |
| 2   | 4-(2,4,4-Trimethyl-cyclohexa-1,5-dienyl)-but-3-en-2-one      | 739        | 1072        | 0-00-0     | mainlib | C13H18O | 190    |
| 3   | 3,6-Nonadien-5-one, 2,2,8,8-tetramethyl-                     | 679        | 190         | 35845-67-1 | mainlib | C13H18O | 190    |
| 4   | syn-Tricyclo[5.1.0.0(2,4)]oct-5-ene, 3,3,5,6,8,8-hexamethyl- | 671        | 141         | 0-00-0     | mainlib | C14H22  | 190    |
| 5   | Ylangenal                                                    | 669        | 130         | 41610-68-8 | mainlib | C15H22O | 218    |

## Indolizine

1st Dimension R.T. = 1253.06  
2nd Dimension R.T. = 1.478  
Quant Mass(es) = 90  
S/N = 144.88  
Area = 78225  
Height = 12362  
Similarity = 881

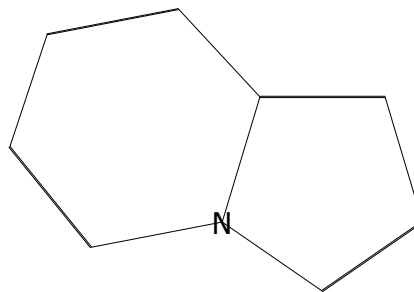

Peak Apex - sample "INF B Comp 091919 (20191122):1", peak 3162, at 1253.06 , 1.478 sec , sec (Spec # 117354)

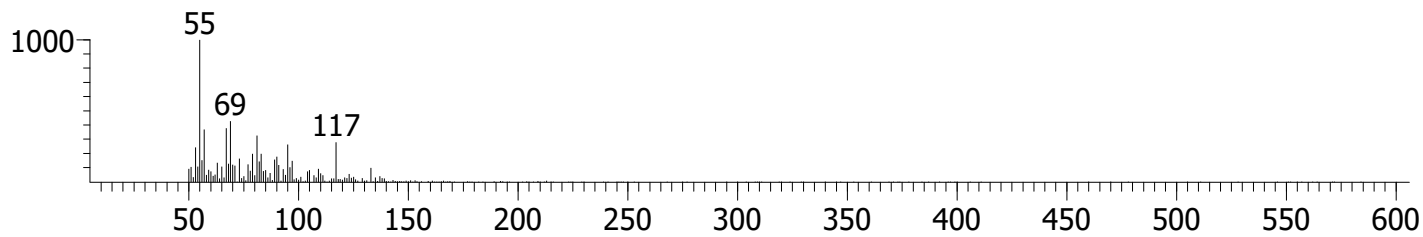

Peak True - sample "INF B Comp 091919 (20191122):1", peak 3162, at 1253.06 , 1.478 sec , sec (Spec # 117354)

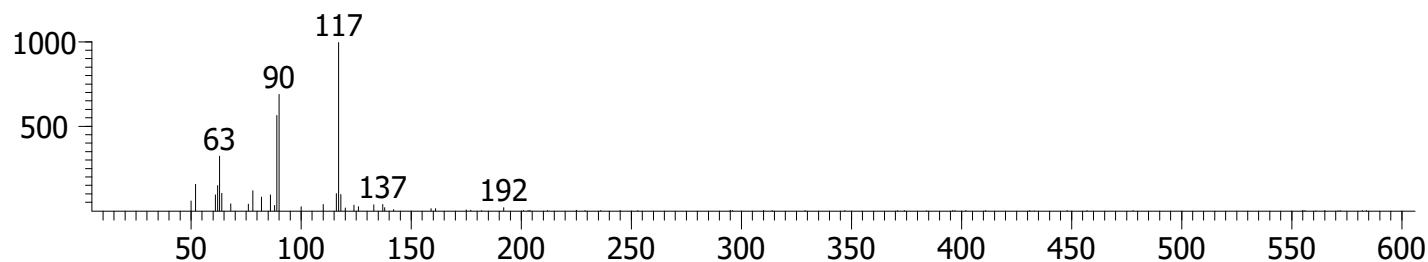

Library Hit - similarity 881, "Indolizine"

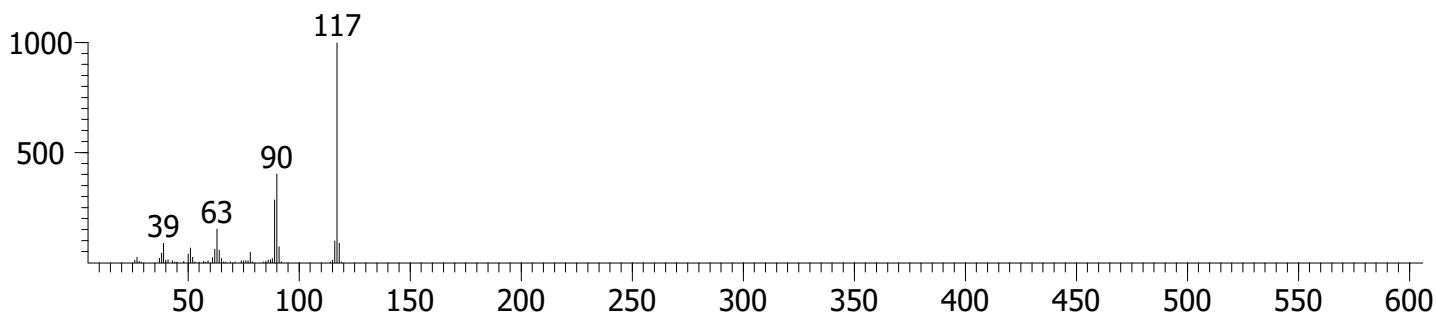

| Hit | Name             | Similarity | Probability | CAS        | Library | Formula | Weight |
|-----|------------------|------------|-------------|------------|---------|---------|--------|
| 1   | Indolizine       | 881        | 4211        | 274-40-8   | mainlib | C8H7N   | 117    |
| 2   | Indole           | 864        | 2298        | 120-72-9   | mainlib | C8H7N   | 117    |
| 3   | 5H-1-Pyridine    | 858        | 1806        | 270-91-7   | mainlib | C8H7N   | 117    |
| 4   | 4-Ethynylaniline | 801        | 338         | 14235-81-5 | mainlib | C8H7N   | 117    |
| 5   | Benzyl nitrile   | 789        | 225         | 140-29-4   | mainlib | C8H7N   | 117    |



ropenyl-2-methylcyclopent-1-enecarboxalde

1st Dimension R.T. = 1385.98  
2nd Dimension R.T. = 1.940  
Quant Mass(es) = 150  
S/N = 729.33  
Area = 237818  
Height = 22477  
Similarity = 831

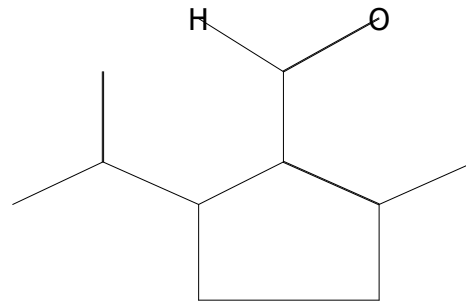

Peak Apex - sample "INF-C comp 091919 (111419):1", peak 3484, at 1385.98 , 1.940 sec , sec (Spec # 137564)

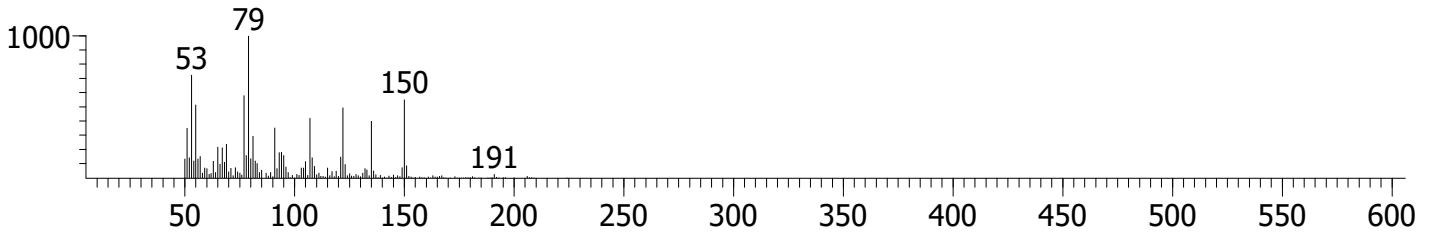

Peak True - sample "INF-C comp 091919 (111419):1", peak 3484, at 1385.98 , 1.940 sec , sec (Spec # 137564)

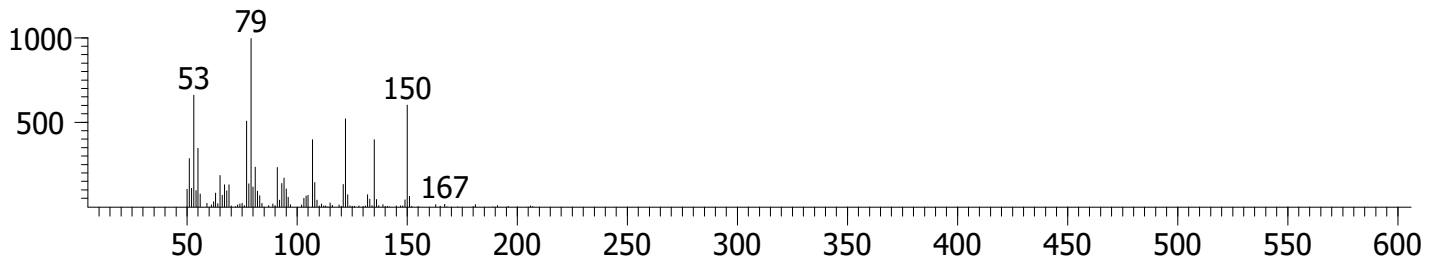

Library Hit - similarity 831, "5-Isopropenyl-2-methylcyclopent-1-enecarboxaldehyde"

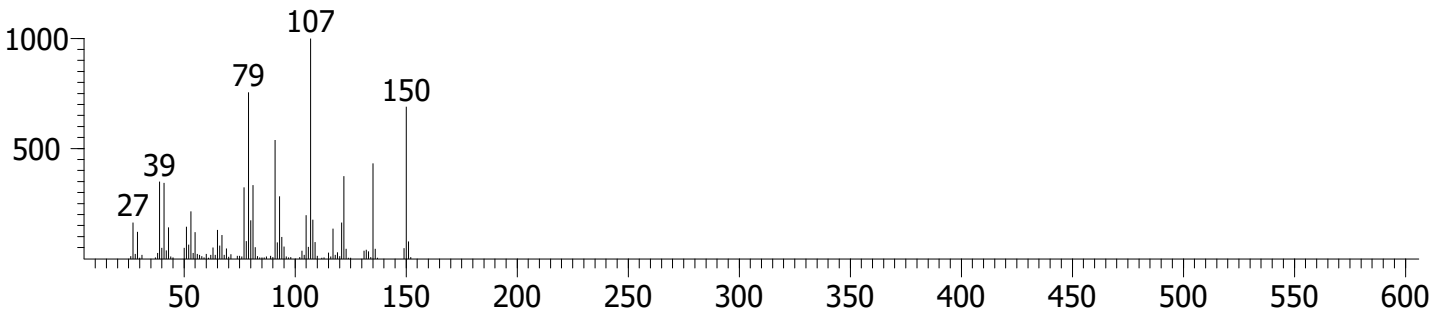

| Hit | Name                                                    | Similarity | Probability | CAS        | Library | Formula | Weight |
|-----|---------------------------------------------------------|------------|-------------|------------|---------|---------|--------|
| 1   | 5-Isopropenyl-2-methylcyclopent-1-enecarboxaldehyde     | 831        | 1691        | 0-00-0     | mainlib | C10H14O | 150    |
| 2   | 3,9-Epoxy-p-mentha-1,8(10)-diene                        | 814        | 923         | 0-00-0     | mainlib | C10H14O | 150    |
| 3   | 2H-Inden-2-one, 1,4,5,6,7,7a-hexahydro-7a-methyl-, (S)- | 805        | 670         | 54725-16-5 | mainlib | C10H14O | 150    |
| 4   | 2-Cyclohexen-1-one, 2-(2-methyl-2-propenyl)-            | 799        | 526         | 18926-98-2 | mainlib | C10H14O | 150    |
| 5   | 1-Cyclohexene-1-carboxaldehyde, 4-(1-methylethenyl)-    | 796        | 465         | 2111-75-3  | mainlib | C10H14O | 150    |

7-Oxabicyclo[4.1.0]heptan-3-ol,  
6-(3-hydroxy-1-butenyl)-1,5,5-trimethyl-

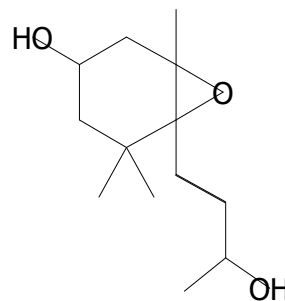

1st Dimension R.T. = 1473.43

2nd Dimension R.T. = 1.841

Quant Mass(es) = 125

S/N = 493.55

Area = 147921

Height = 11990

Similarity = 783

Peak Apex - sample "INF B Comp 091919 (20191122):1", peak 4589, at 1473.43 , 1.841 sec , sec (Spec # 15 0799)

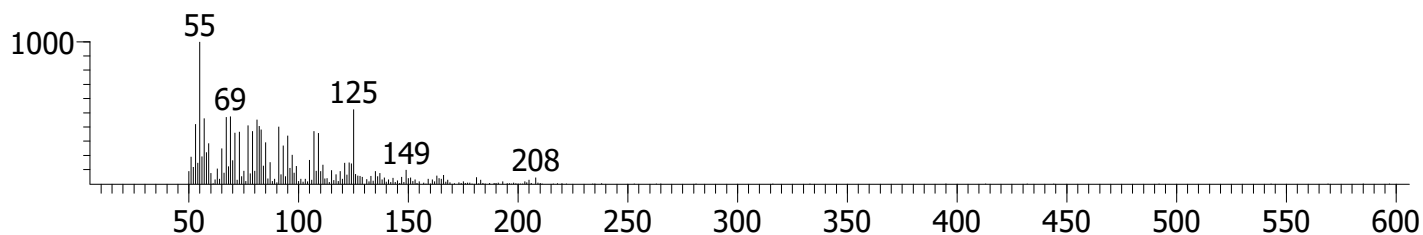

Peak True - sample "INF B Comp 091919 (20191122):1", peak 4589, at 1473.43 , 1.841 sec , sec (Spec # 150 799)

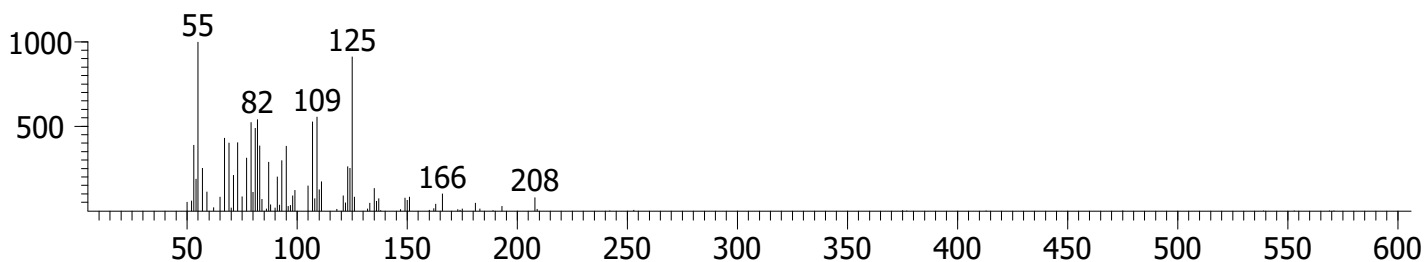

Library Hit - similarity 783, "7-Oxabicyclo[4.1.0]heptan-3-ol, 6-(3-hydroxy-1-butenyl)-1,5,5-trimethyl-"

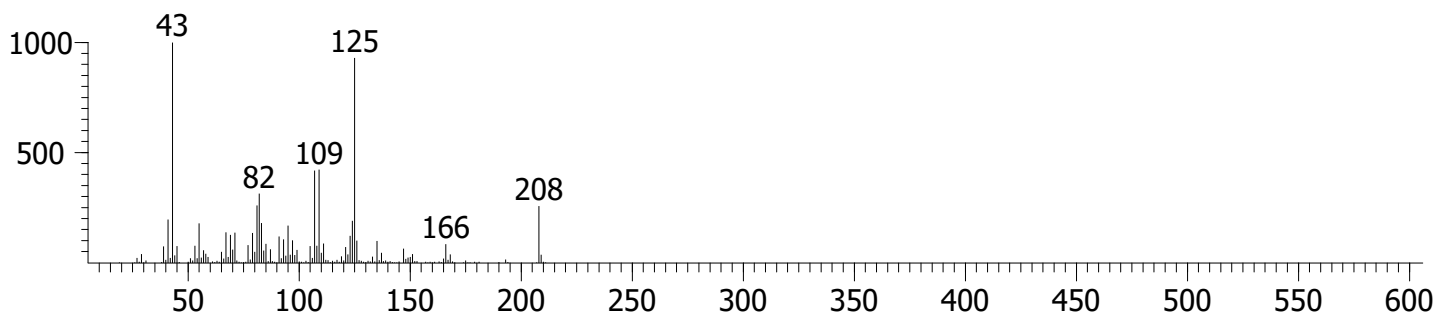

| Hit | Name                                                                        | Similarity | Probability | CAS        | Library | Formula  | Weight |
|-----|-----------------------------------------------------------------------------|------------|-------------|------------|---------|----------|--------|
| 1   | 7-Oxabicyclo[4.1.0]heptan-3-ol, 6-(3-hydroxy-1-butenyl)-1,5,5-trimethyl-    | 783        | 5382        | 72777-88-9 | mainlib | C13H22O3 | 226    |
| 2   | 3-Buten-2-one, 4-(2-hydroxy-2,6,6-trimethylcyclohexyl)-                     | 750        | 1409        | 55955-46-9 | mainlib | C13H22O2 | 210    |
| 3   | Dihydronopol                                                                | 699        | 284         | 0-00-0     | mainlib | C11H20O  | 168    |
| 4   | 3-Buten-2-one, 3-methyl-4-(1,3,3-trimethyl-7-oxabicyclo[4.1.0]heptan-1-yl)- | 698        | 273         | 97371-44-3 | mainlib | C14H22O2 | 222    |
| 5   | 5-Isopropyl-6-methyl-hepta-3,5-dien-2-ol                                    | 690        | 203         | 0-00-0     | mainlib | C11H20O  | 168    |

## 5-Ethoxy-2-methyl-pyridine

1st Dimension R.T. = 1476.93  
2nd Dimension R.T. = 2.495  
Quant Mass(es) = 137  
S/N = 136.70  
Area = 84863  
Height = 8751.0  
Similarity = 726

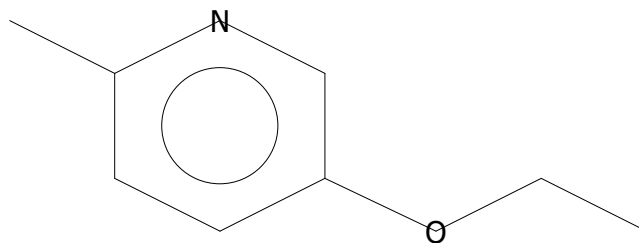

Peak Apex - sample "INF-A comp 092319 (111419):1", peak 3504, at 1476.93 , 2.495 sec , sec (Spec # 151428)

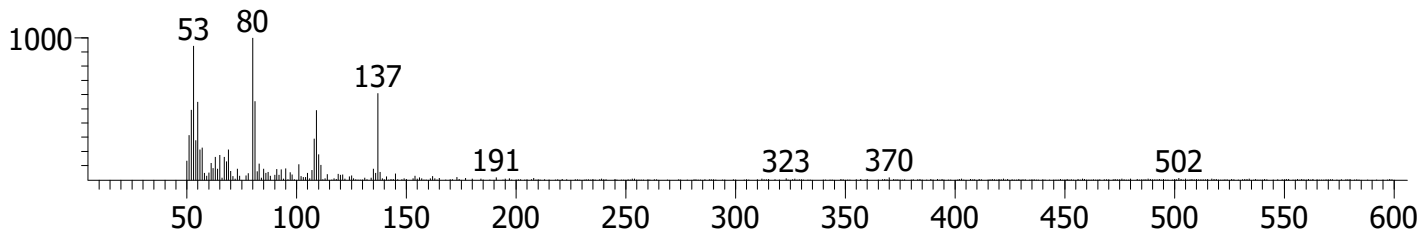

Peak True - sample "INF-A comp 092319 (111419):1", peak 3504, at 1476.93 , 2.495 sec , sec (Spec # 151428)

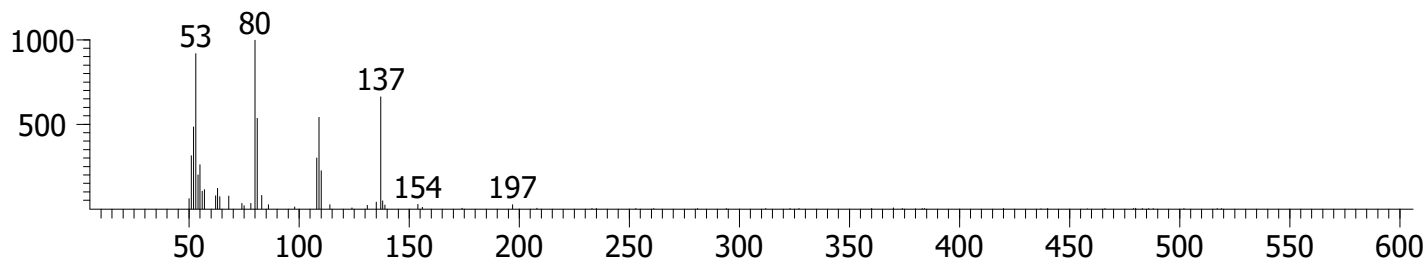

Library Hit - similarity 726, "5-Ethoxy-2-methyl-pyridine"

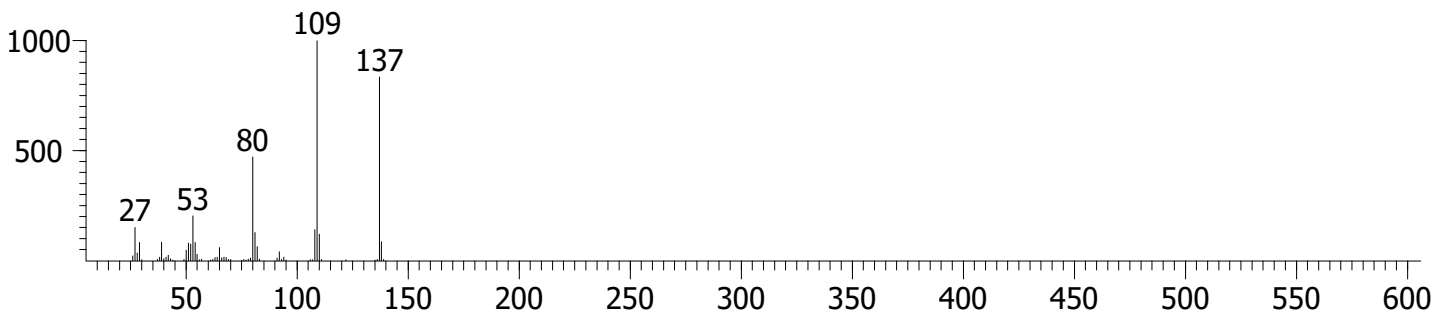

| Hit | Name                             | Similarity | Probability | CAS        | Library | Formula  | Weight |
|-----|----------------------------------|------------|-------------|------------|---------|----------|--------|
| 1   | 5-Ethoxy-2-methyl-pyridine       | 726        | 3738        | 55270-48-9 | mainlib | C8H11NO  | 137    |
| 2   | N-Methyl-3-formyl-2(1H)-pyridone | 685        | 853         | 79138-28-6 | mainlib | C7H7NO2  | 137    |
| 3   | Benzenamine, 3-ethoxy-           | 674        | 585         | 621-33-0   | mainlib | C8H11NO  | 137    |
| 4   | 5-[3-Methyl-2-furyl]hydantoin    | 671        | 517         | 0-00-0     | mainlib | C8H8N2O3 | 180    |
| 5   | 8-Azabicyclo[3.2.1]oct-2-ene     | 661        | 365         | 5632-85-9  | mainlib | C7H11N   | 109    |

## 2-(4-(But-2-yl)phenyl)propanoic acid

1st Dimension R.T. = 1480.43  
2nd Dimension R.T. = 1.564  
Quant Mass(es) = 163  
S/N = 120.70  
Area = 12455  
Height = 1833.4  
Similarity = 677

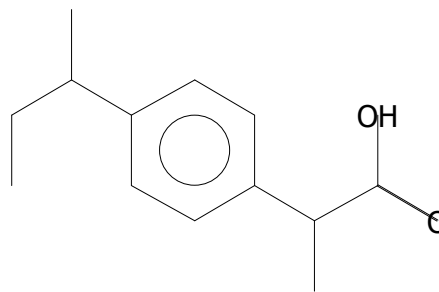

Peak Apex - sample "INF-C comp 091919 (111419):1", peak 4018, at 1480.43 , 1.564 sec , sec (Spec # 151817)

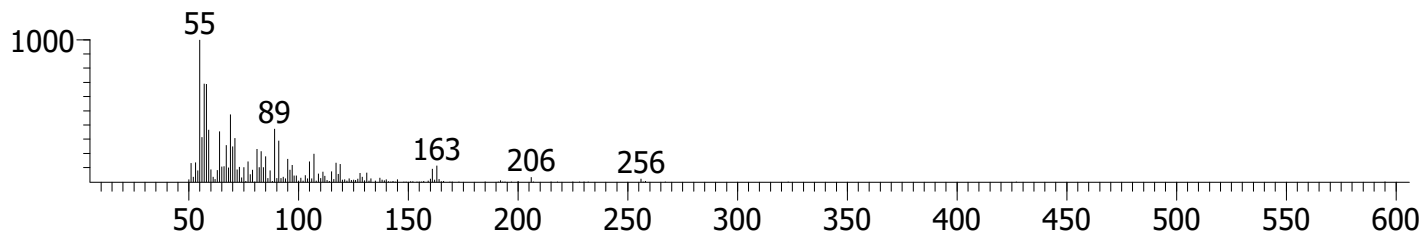

Peak True - sample "INF-C comp 091919 (111419):1", peak 4018, at 1480.43 , 1.564 sec , sec (Spec # 151817)

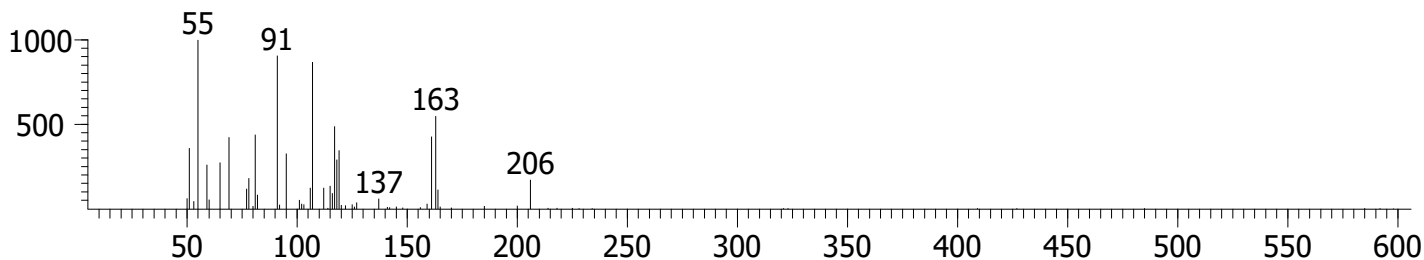

Library Hit - similarity 677, "2-(4-(But-2-yl)phenyl)propanoic acid"

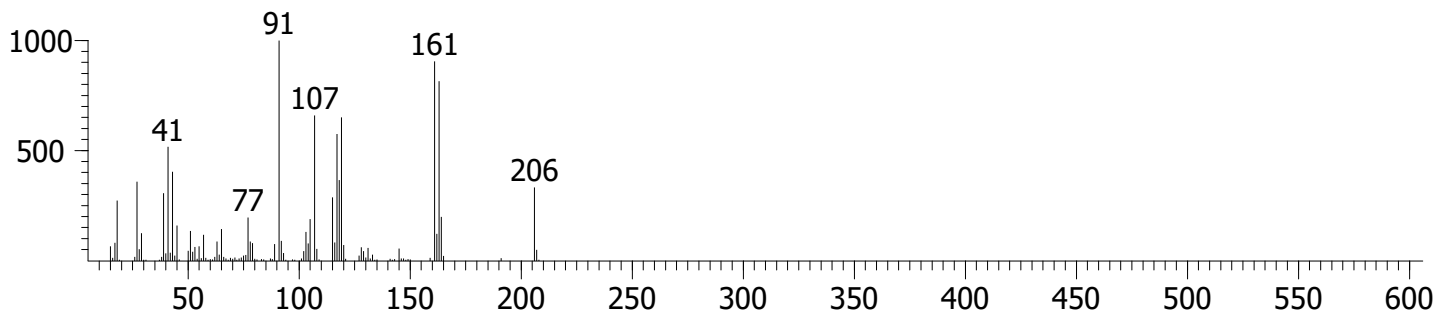

| Hit | Name                                                           | Similarity | Probability | CAS         | Library | Formula    | Weight |
|-----|----------------------------------------------------------------|------------|-------------|-------------|---------|------------|--------|
| 1   | 2-(4-(But-2-yl)phenyl)propanoic acid                           | 677        | 5934        | 64451-76-9  | mainlib | C13H18O2   | 206    |
| 2   | Ibuprofen                                                      | 639        | 1421        | 15687-27-1  | mainlib | C13H18O2   | 206    |
| 3   | 2-(3-Isobutylphenyl)propionic acid                             | 625        | 890         | 66622-47-7  | mainlib | C13H18O2   | 206    |
| 4   | 1-(3,5-Dimethyl-1-adamantanoyl)semicarbazide                   | 620        | 717         | 351327-47-4 | mainlib | C14H23N3O2 | 265    |
| 5   | Hydrocinnamic acid, à-methyl-, ester with 2-methylacetonitrile | 543        | 87          | 14025-74-2  | mainlib | C14H17NO2  | 231    |

## Benzothiazole, 6-methoxy-2-methyl-

1st Dimension R.T. = 1515.41  
2nd Dimension R.T. = 2.508  
Quant Mass(es) = 164  
S/N = 151.10  
Area = 28908  
Height = 2395.5  
Similarity = 668

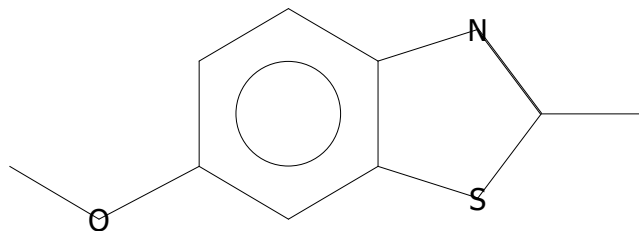

Peak Apex - sample "INF B Comp 091919 (20191122):1", peak 4866, at 1515.41 , 2.508 sec , sec (Spec # 157260)

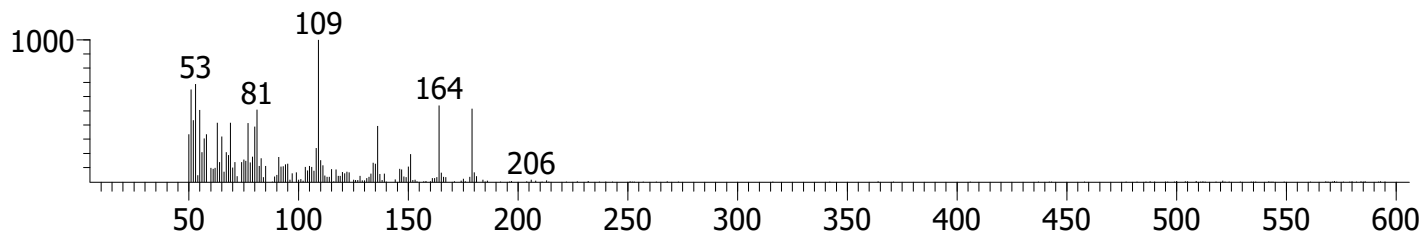

Peak True - sample "INF B Comp 091919 (20191122):1", peak 4866, at 1515.41 , 2.508 sec , sec (Spec # 157260)

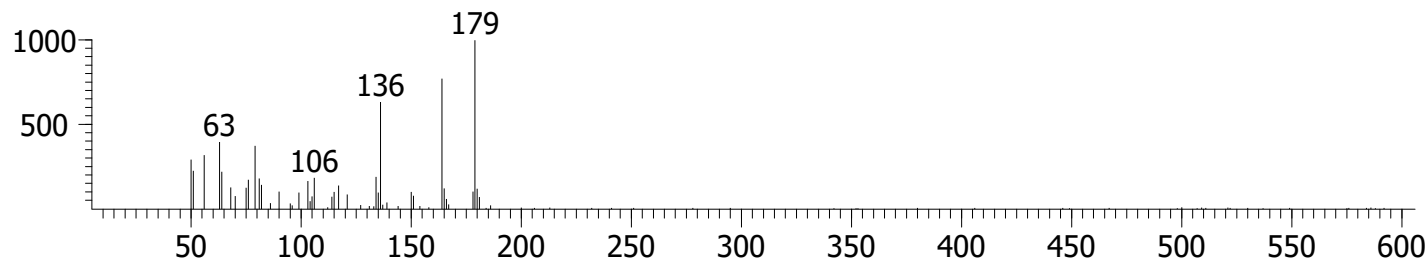

Library Hit - similarity 668, "Benzothiazole, 6-methoxy-2-methyl-"

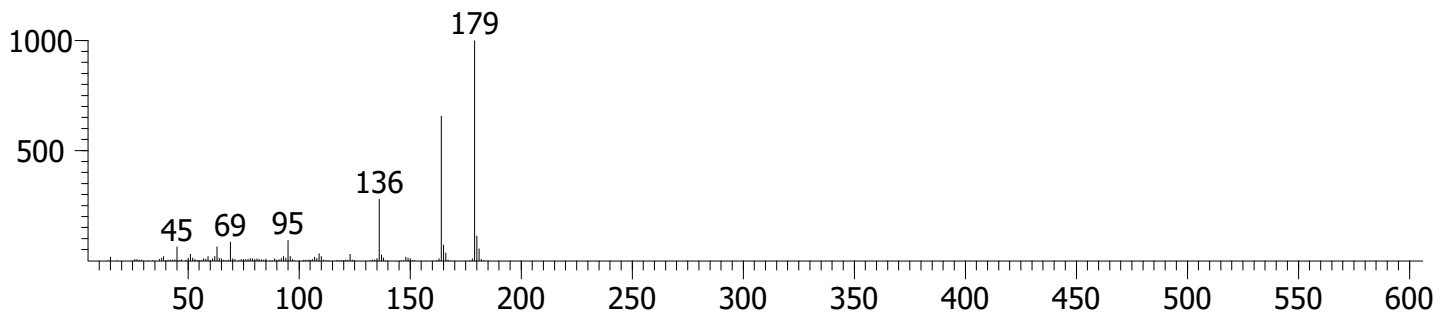

| Hit | Name                                        | Similarity | Probability | CAS        | Library | Formula  | Weight |
|-----|---------------------------------------------|------------|-------------|------------|---------|----------|--------|
| 1   | Benzothiazole, 6-methoxy-2-methyl-          | 668        | 1567        | 2941-72-2  | mainlib | C9H9NOS  | 179    |
| 2   | Ethanone, 1-(6-amino-1,3-benzodioxol-5-yl)- | 661        | 1200        | 28657-75-2 | mainlib | C9H9NO3  | 179    |
| 3   | benzenamine, N,N-diethyl-3-methoxy-         | 660        | 1154        | 0-00-0     | mainlib | C11H17NO | 179    |
| 4   | 5-Methoxy-2-methylbenzothiazole             | 660        | 1154        | 0-00-0     | mainlib | C9H9NOS  | 179    |
| 5   | benzenemethanol, 4-(diethylamino)-          | 654        | 907         | 0-00-0     | mainlib | C11H17NO | 179    |

### 3-Pyridinol, 6-methyl-, acetate (ester)

1st Dimension R.T. = 1504.91  
2nd Dimension R.T. = 2.620  
Quant Mass(es) = 109  
S/N = 1747.2  
Area = 736881  
Height = 55862  
Similarity = 874

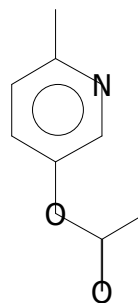

Peak Apex - sample "INF-C comp 091919 (111419):1", peak 4173, at 1504.91 , 2.620 sec , sec (Spec # 155687)

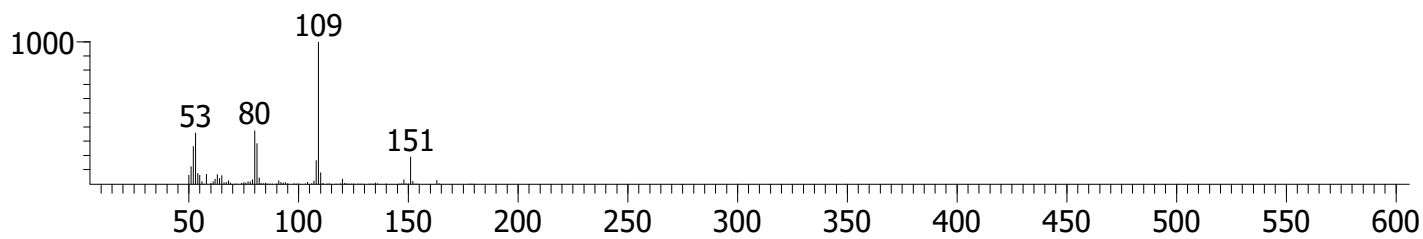

Peak True - sample "INF-C comp 091919 (111419):1", peak 4173, at 1504.91 , 2.620 sec , sec (Spec # 155687)

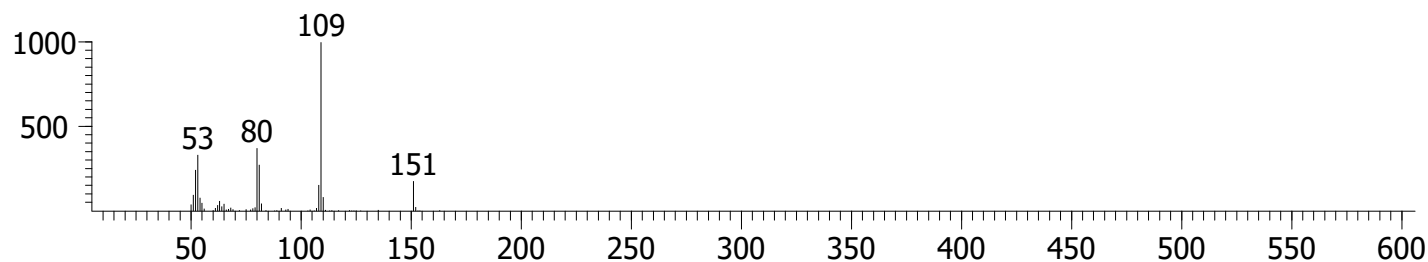

Library Hit - similarity 874, "3-Pyridinol, 6-methyl-, acetate (ester)"

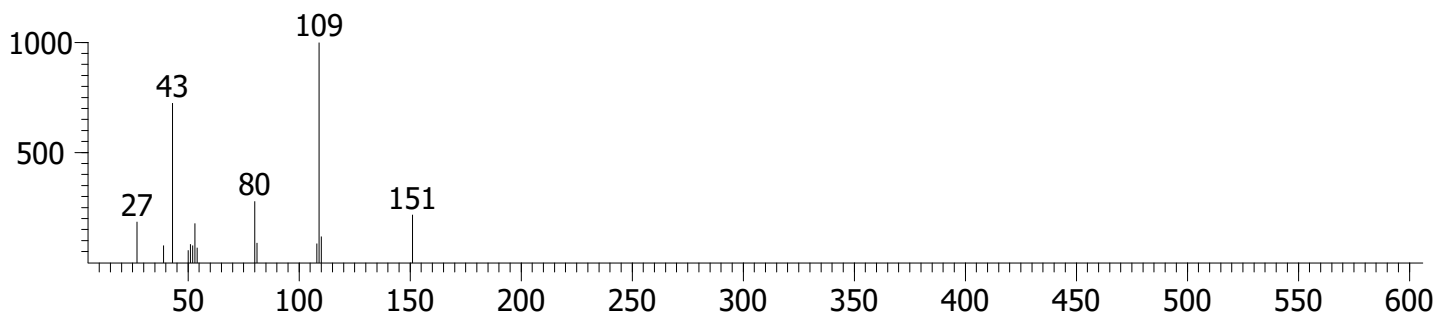

| Hit | Name                                    | Similarity | Probability | CAS       | Library | Formula | Weight |
|-----|-----------------------------------------|------------|-------------|-----------|---------|---------|--------|
| 1   | 3-Pyridinol, 6-methyl-, acetate (ester) | 874        | 2599        | 4842-89-1 | mainlib | C8H9NO2 | 151    |
| 2   | Acetaminophen                           | 858        | 1497        | 103-90-2  | mainlib | C8H9NO2 | 151    |
| 3   | Metacetamol                             | 851        | 1146        | 621-42-1  | mainlib | C8H9NO2 | 151    |
| 4   | Acetamide, N-(2-hydroxyphenyl)-         | 850        | 1102        | 614-80-2  | mainlib | C8H9NO2 | 151    |
| 5   | Phenol, 4-amino-                        | 846        | 931         | 123-30-8  | mainlib | C6H7NO  | 109    |

1,4-diazabicyclo[4.3.0]nonan-2,5-dione,  
3-methyl

1st Dimension R.T. = 1539.89  
2nd Dimension R.T. = 2.752  
Quant Mass(es) = 70  
S/N = 173.90  
Area = 146689  
Height = 12608  
Similarity = 780

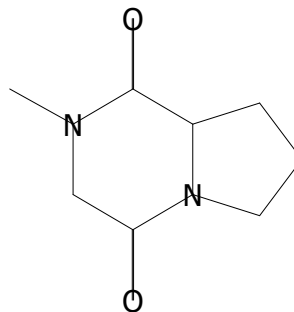

Peak Apex - sample "INF-A grab 100819 (111419):1", peak 3260, at 1539.89 , 2.752 sec , sec (Spec # 161007)

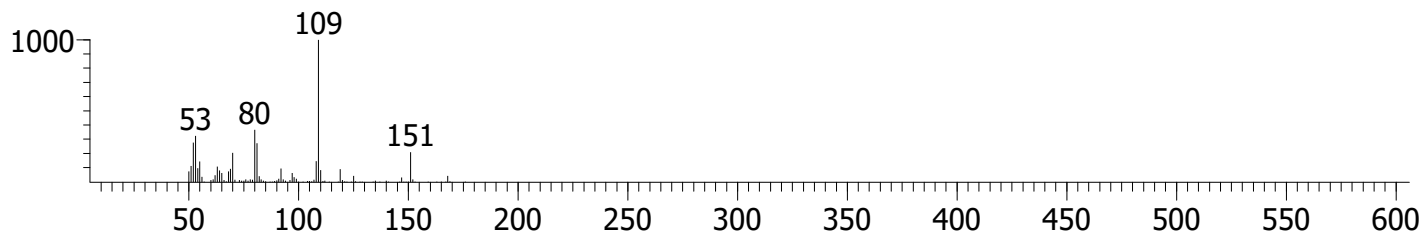

Peak True - sample "INF-A grab 100819 (111419):1", peak 3260, at 1539.89 , 2.752 sec , sec (Spec # 161007)

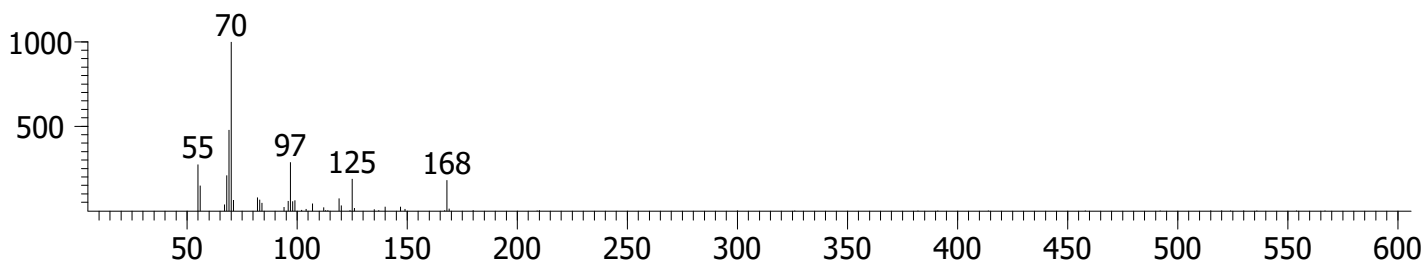

Library Hit - similarity 780, "1,4-diazabicyclo[4.3.0]nonan-2,5-dione, 3-methyl"

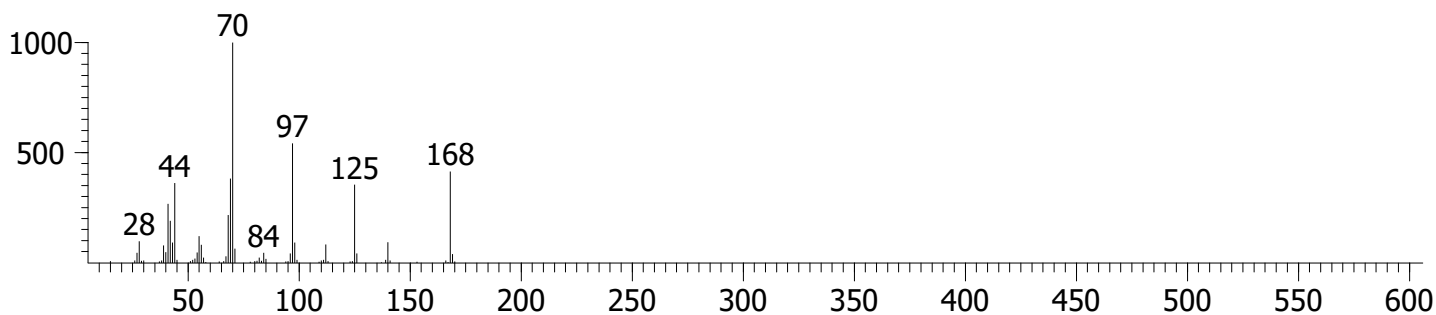

| Hit | Name                                                       | Similarity | Probability | CAS    | Library | Formula    | Weight |
|-----|------------------------------------------------------------|------------|-------------|--------|---------|------------|--------|
| 1   | 1,4-diazabicyclo[4.3.0]nonan-2,5-dione, 3-methyl           | 780        | 5731        | 0-00-0 | mainlib | C8H12N2O2  | 168    |
| 2   | 3-Pyrrolidin-2-yl-propionic acid                           | 738        | 1286        | 0-00-0 | mainlib | C7H13NO2   | 143    |
| 3   | 3-Methyl-1,4-diazabicyclo[4.3.0]nonan-2,5-dione, N-acetyl- | 733        | 1036        | 0-00-0 | mainlib | C10H14N2O3 | 210    |
| 4   | Methyl 4,6-decadienyl ether                                | 690        | 228         | 0-00-0 | mainlib | C11H20O    | 168    |
| 5   | 2-Acetoxydodecane                                          | 671        | 111         | 0-00-0 | mainlib | C14H28O2   | 228    |

# Azulene, 1,4-dimethyl-7-(1-methylethyl)-

1st Dimension R.T. = 1585.37  
2nd Dimension R.T. = 1.901  
Quant Mass(es) = 183  
S/N = 82.033  
Area = 6733.7  
Height = 728.57  
Similarity = 659

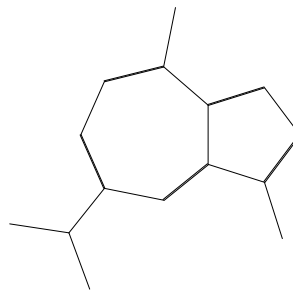

Peak Apex - sample "INF B Comp 091919 (20191122):1", peak 5292, at 1585.37 , 1.901 sec , sec (Spec # 167768)

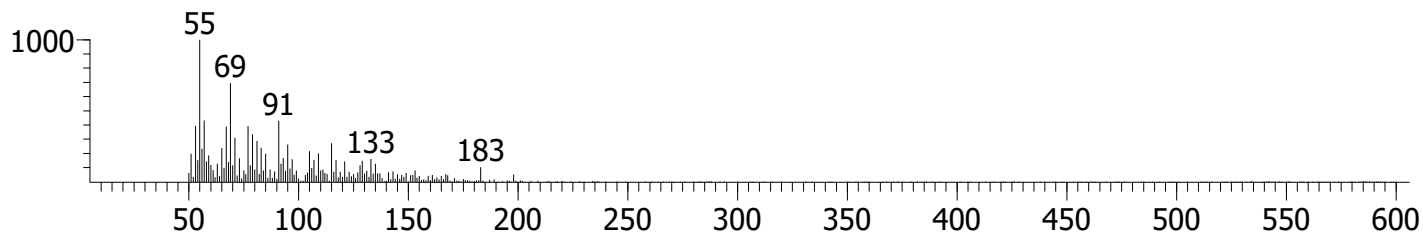

Peak True - sample "INF B Comp 091919 (20191122):1", peak 5292, at 1585.37 , 1.901 sec , sec (Spec # 167768)

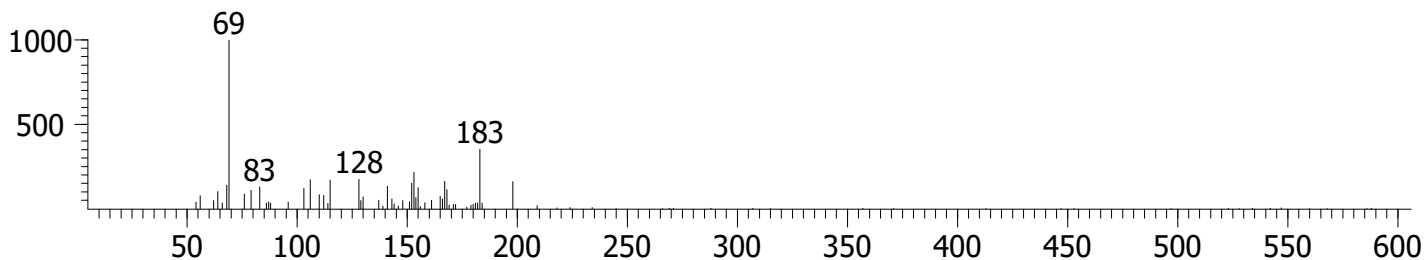

Library Hit - similarity 659, "Azulene, 1,4-dimethyl-7-(1-methylethyl)-"

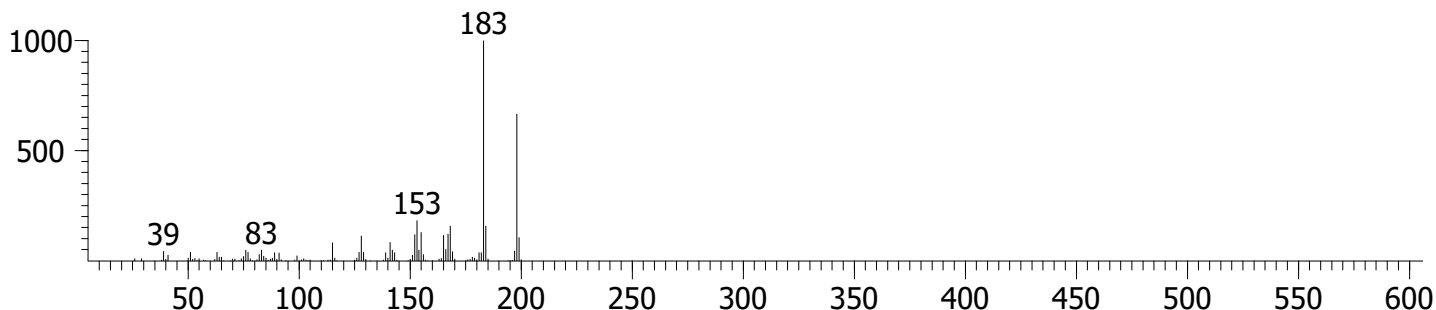

| Hit | Name                                                        | Similarity | Probability | CAS      | Library | Formula | Weight |
|-----|-------------------------------------------------------------|------------|-------------|----------|---------|---------|--------|
| 1   | Azulene, 1,4-dimethyl-7-(1-methylethyl)-                    | 659        | 5816        | 489-84-9 | mainlib | C15H18  | 198    |
| 2   | Cyclopropane, 1,1,2,2-tetramethyl-3-(2-phenylethenylideno)- | 618        | 1327        | 0-00-0   | mainlib | C15H18  | 198    |
| 3   | Naphthalene, 1,6-dimethyl-4-(1-methylethyl)-                | 612        | 1043        | 483-78-3 | mainlib | C15H18  | 198    |
| 4   | 6-Isopropyl-1,4-dimethylnaphthalene                         | 601        | 715         | 489-77-0 | mainlib | C15H18  | 198    |
| 5   | Benzene, 1,1',1'',1'''-(oxydimethylidyne)tetrakis-          | 563        | 171         | 574-42-5 | mainlib | C26H22O | 350    |



1H-2-Benzopyran-1-one,  
3,4-dihydro-8-hydroxy-6-methoxy-3-methyl-,

1st Dimension R.T. = 1648.33  
 2nd Dimension R.T. = 2.343  
 Quant Mass(es) = 164  
 S/N = 269.25  
 Area = 39544  
 Height = 3531.2  
 Similarity = 758

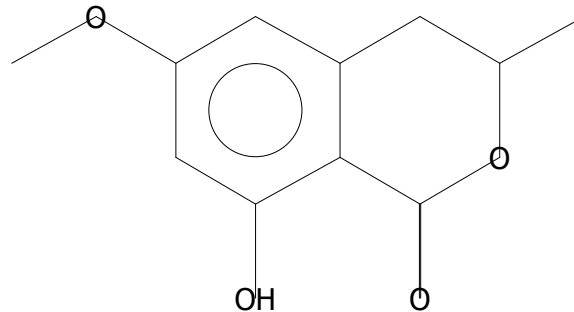

Peak Apex - sample "INF B Comp 091919 (20191122):1", peak 5671, at 1648.33 , 2.343 sec , sec (Spec # 17 7375)

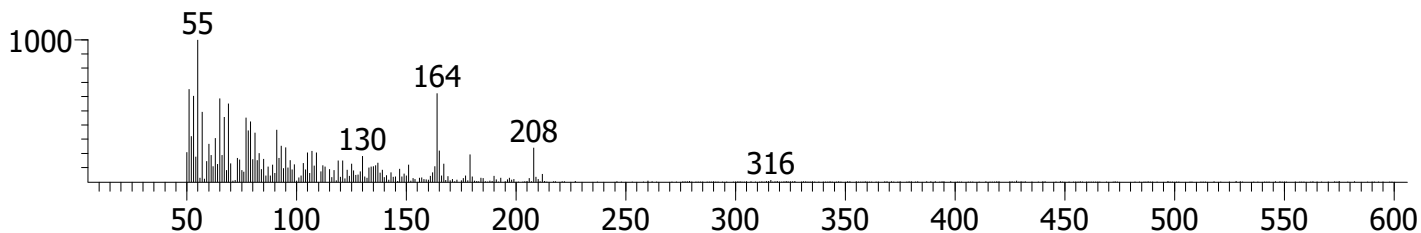

Peak True - sample "INF B Comp 091919 (20191122):1", peak 5671, at 1648.33 , 2.343 sec , sec (Spec # 177 375)

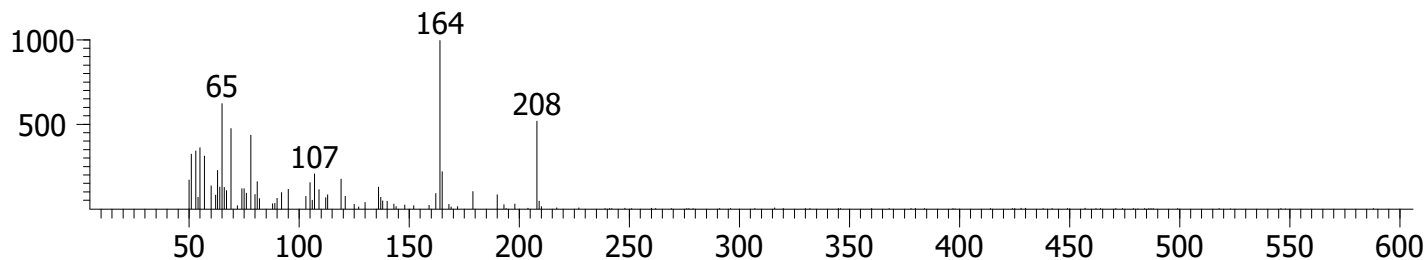

Library Hit - similarity 758, "1H-2-Benzopyran-1-one, 3,4-dihydro-8-hydroxy-6-methoxy-3-methyl-, (R)-"

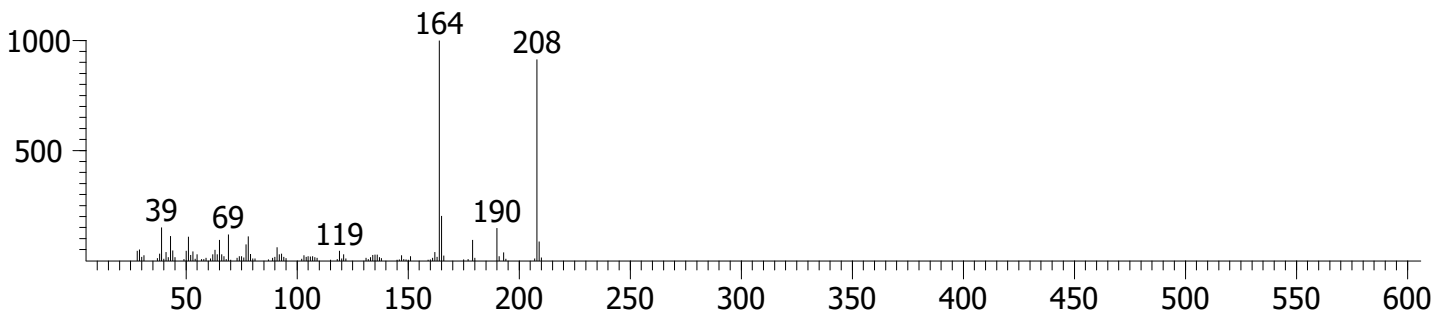

| Hit | Name                                                                   | Similarity | Probability | CAS        | Library | Formula     | Weight |
|-----|------------------------------------------------------------------------|------------|-------------|------------|---------|-------------|--------|
| 1   | 1H-2-Benzopyran-1-one, 3,4-dihydro-8-hydroxy-6-methoxy-3-methyl-, (R)- | 758        | 7901        | 13410-15-6 | mainlib | C11H12O4    | 208    |
| 2   | 1H-2-Benzopyran-1-one, 3,4-dihydro-8-hydroxy-6-methoxy-3-methyl-       | 707        | 1592        | 6803-02-7  | mainlib | C11H12O4    | 208    |
| 3   | 7-[3-Chloro-2-hydroxypropyl]guanine                                    | 647        | 282         | 73100-76-2 | mainlib | C8H10ClN5O2 | 243    |
| 4   | 6,7-Dimethoxy-3-isochromanone                                          | 604        | 62          | 16135-41-4 | mainlib | C11H12O4    | 208    |
| 5   | 1,3-Dimethyl-3-hydroxy-5-methoxyoxindole                               | 576        | 18          | 0-00-0     | mainlib | C11H13NO3   | 207    |

# Indole-2,3-dione, 1-(hydroxymethyl)-

1st Dimension R.T. = 1658.83  
2nd Dimension R.T. = 2.145  
Quant Mass(es) = 119  
S/N = 190.15  
Area = 32532  
Height = 3615.4  
Similarity = 729

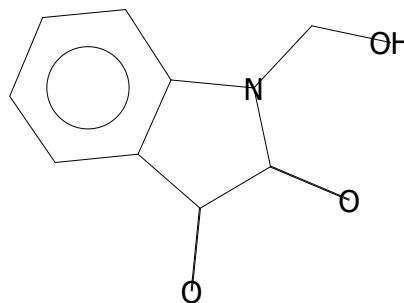

Peak Apex - sample "INF B Comp 091919 (20191122):1", peak 5743, at 1658.83 , 2.145 sec , sec (Spec # 178935)

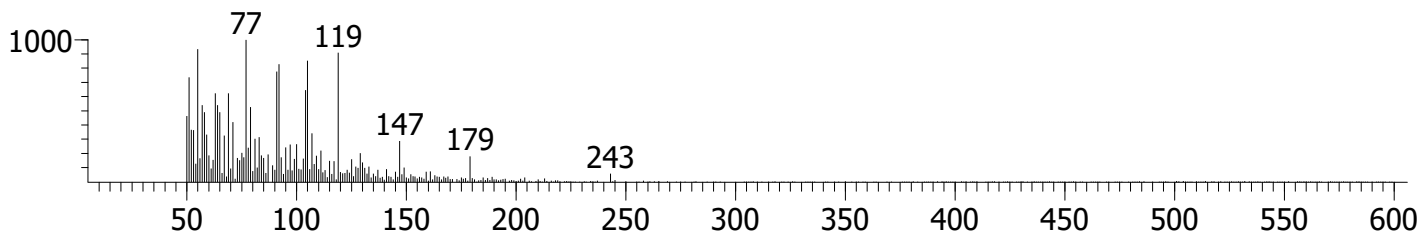

Peak True - sample "INF B Comp 091919 (20191122):1", peak 5743, at 1658.83 , 2.145 sec , sec (Spec # 178935)

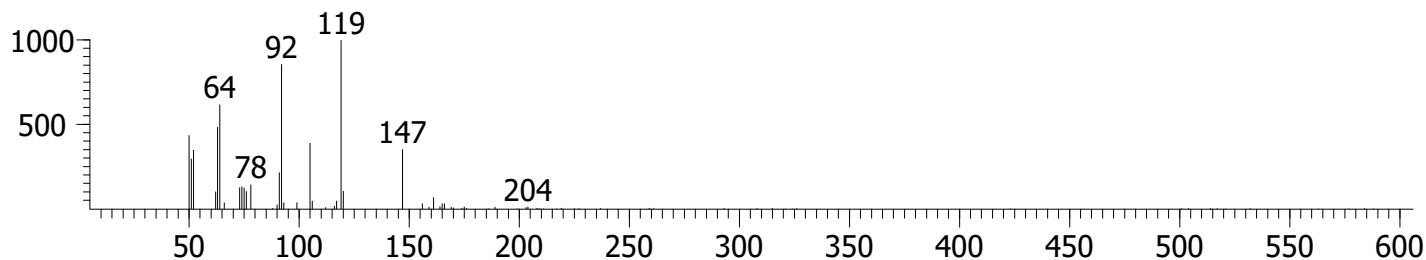

Library Hit - similarity 729, "Indole-2,3-dione, 1-(hydroxymethyl)-"

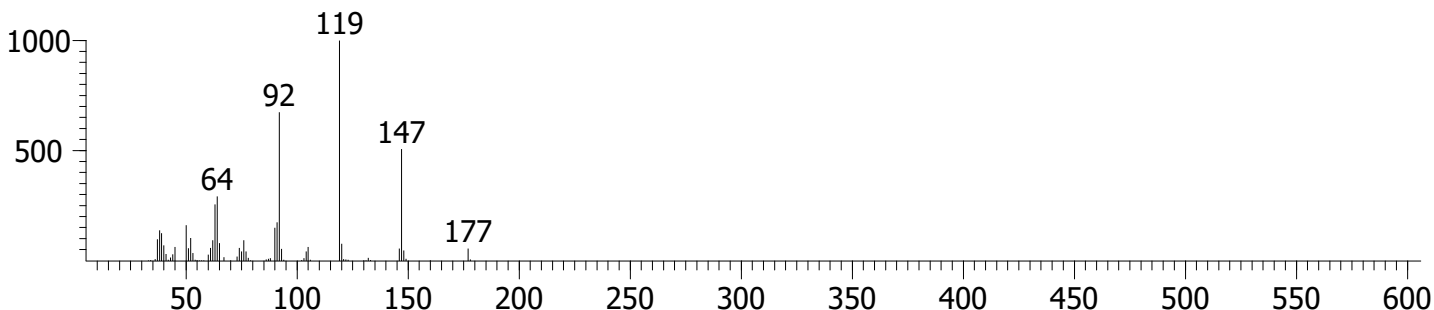

| Hit | Name                                 | Similarity | Probability | CAS        | Library | Formula | Weight |
|-----|--------------------------------------|------------|-------------|------------|---------|---------|--------|
| 1   | Indole-2,3-dione, 1-(hydroxymethyl)- | 729        | 3521        | 50899-59-7 | mainlib | C9H7NO3 | 177    |
| 2   | 2,1-Benzisoxazole                    | 712        | 1922        | 271-58-9   | mainlib | C7H5NO  | 119    |
| 3   | 1H-Indole-2,3-dione                  | 699        | 1241        | 91-56-5    | mainlib | C8H5NO2 | 147    |
| 4   | Isatoic anhydride                    | 684        | 752         | 118-48-9   | mainlib | C8H5NO3 | 163    |
| 5   | Benzonitrile, 4-ethoxy-              | 678        | 591         | 25117-74-2 | mainlib | C9H9NO  | 147    |

## 1H-Indole-3-propanoic acid

1st Dimension R.T. = 1788.25

2nd Dimension R.T. = 2.633

Quant Mass(es) = 130

S/N = 262.14

Area = 75565

Height = 5488.3

Similarity = 741

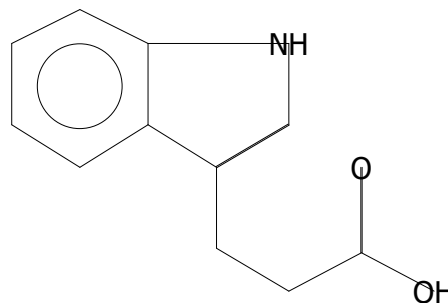

Peak Apex - sample "INF B Comp 091919 (20191122):1", peak 6535, at 1788.25 , 2.633 sec , sec (Spec # 198619)

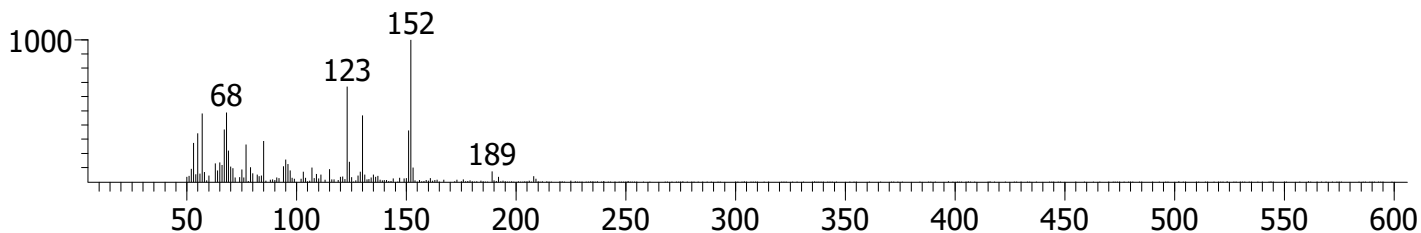

Peak True - sample "INF B Comp 091919 (20191122):1", peak 6535, at 1788.25 , 2.633 sec , sec (Spec # 198619)

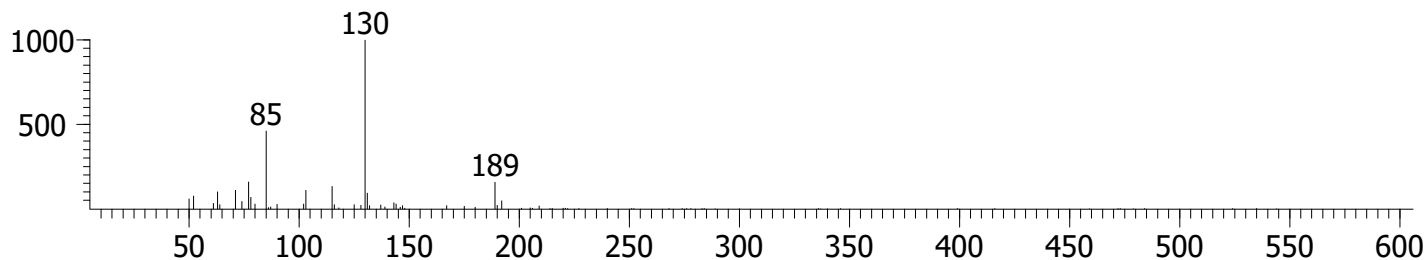

Library Hit - similarity 741, "1H-Indole-3-propanoic acid"

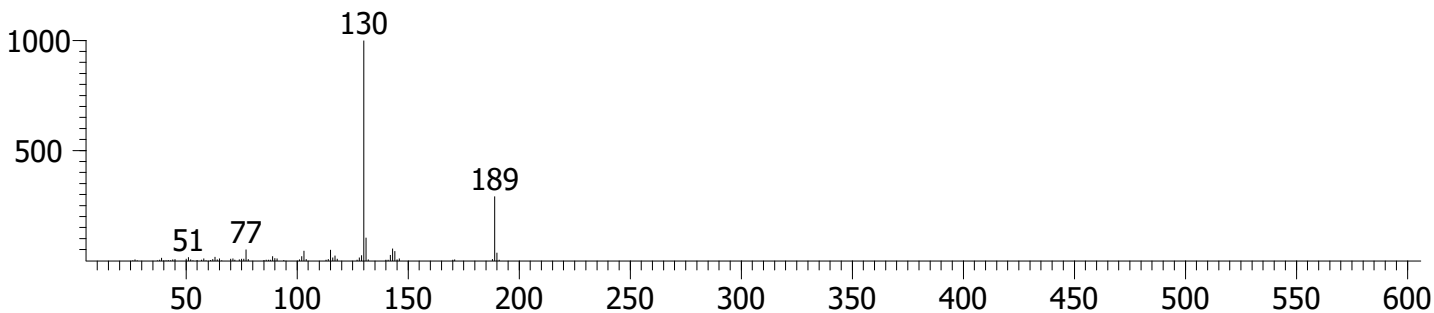

| Hit | Name                                                                                     | Similarity | Probability | CAS         | Library | Formula    | Weight |
|-----|------------------------------------------------------------------------------------------|------------|-------------|-------------|---------|------------|--------|
| 1   | 1H-Indole-3-propanoic acid                                                               | 741        | 4344        | 830-96-6    | mainlib | C11H11NO2  | 189    |
| 2   | 1H-Indol-3-ylmethyl acetate #                                                            | 727        | 2719        | 959256-81-6 | mainlib | C11H11NO2  | 189    |
| 3   | 3-[2,2-Dicarbomethoxyethyl]indole                                                        | 691        | 672         | 79782-15-3  | mainlib | C14H15NO4  | 261    |
| 4   | Propionic acid, 2-[(2-hydroxy-5-nitrobenzylidene)amino]-3-(1H-indol-3-yl)-, methyl ester | 663        | 194         | 0-00-0      | mainlib | C19H17N3O5 | 367    |
| 5   | L-Tryptophan, N-(methoxycarbonyl)-, methyl ester                                         | 660        | 171         | 58635-46-4  | mainlib | C14H16N2O4 | 276    |

## Isofraxidin

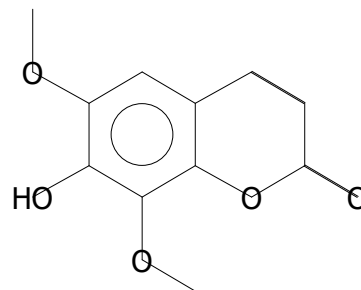

1st Dimension R.T. = 1893.19

2nd Dimension R.T. = 2.739

Quant Mass(es) = 222

S/N = 85.682

Area = 17270

Height = 1547.3

Similarity = 728

Peak Apex - sample "INF B Comp 091919 (20191122):1", peak 6971, at 1893.19 , 2.739 sec , sec (Spec # 214535)

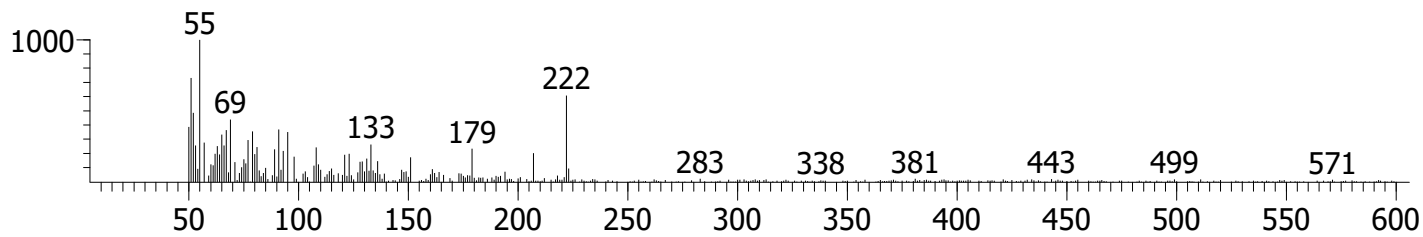

Peak True - sample "INF B Comp 091919 (20191122):1", peak 6971, at 1893.19 , 2.739 sec , sec (Spec # 214535)

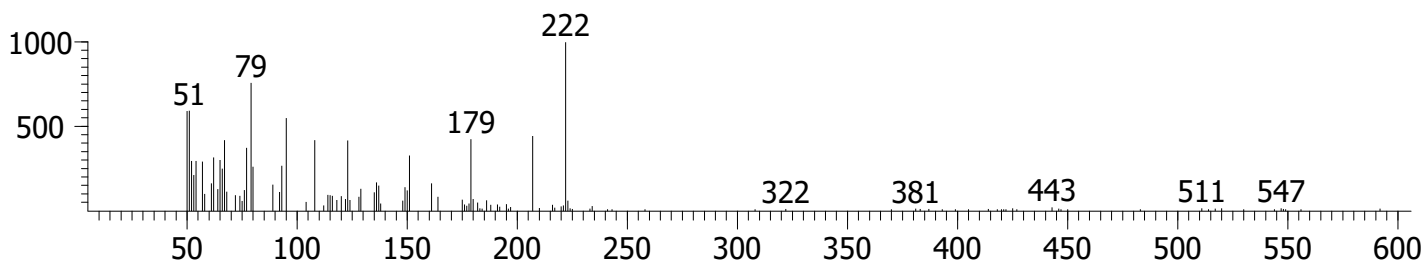

Library Hit - similarity 728, "Isofraxidin"

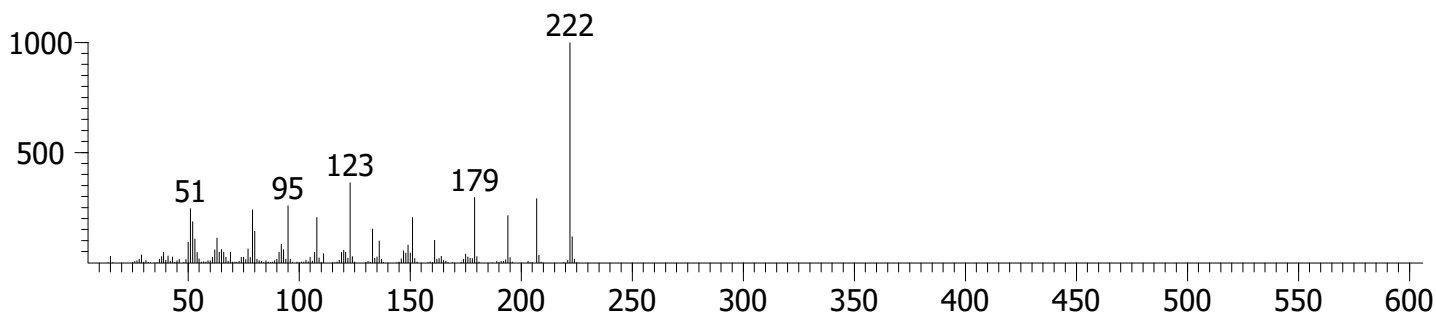

| Hit | Name                                    | Similarity | Probability | CAS        | Library | Formula                                        | Weight |
|-----|-----------------------------------------|------------|-------------|------------|---------|------------------------------------------------|--------|
| 1   | Isofraxidin                             | 728        | 6611        | 486-21-5   | mainlib | C <sub>11</sub> H <sub>10</sub> O <sub>5</sub> | 222    |
| 2   | Fraxinol                                | 667        | 1151        | 486-28-2   | mainlib | C <sub>11</sub> H <sub>10</sub> O <sub>5</sub> | 222    |
| 3   | Isofraxidin, acetate                    | 658        | 836         | 61195-38-8 | mainlib | C <sub>13</sub> H <sub>12</sub> O <sub>6</sub> | 264    |
| 4   | Fraxinol, acetate                       | 633        | 255         | 28752-90-1 | mainlib | C <sub>13</sub> H <sub>12</sub> O <sub>6</sub> | 264    |
| 5   | (Z)-1-(2,4,5-Trimethoxyphenyl)but-1-ene | 632        | 245         | 0-00-0     | mainlib | C <sub>13</sub> H <sub>18</sub> O <sub>3</sub> | 222    |

## 2,5-Piperazinedione, 3-(phenylmethyl)-

1st Dimension R.T. = 1980.64

2nd Dimension R.T. = 3.227

Quant Mass(es) = 91

S/N = 79.384

Area = 104924

Height = 7270.1

Similarity = 861

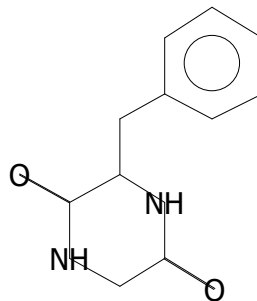

Peak Apex - sample "INF B Comp 091919 (20191122):1", peak 7333, at 1980.64 , 3.227 sec , sec (Spec # 227859)

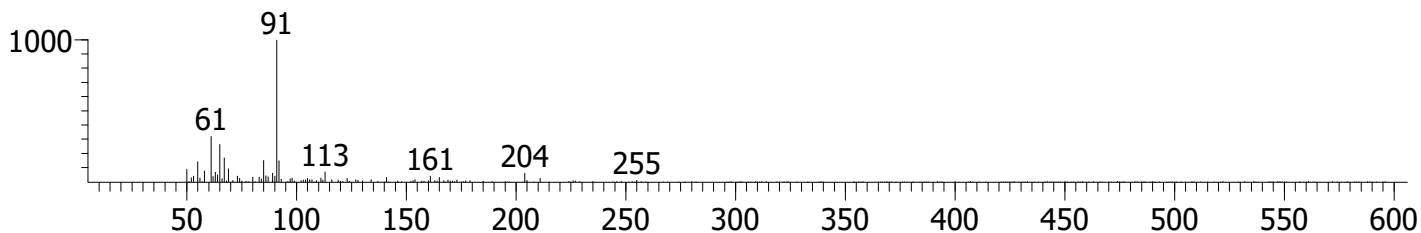

Peak True - sample "INF B Comp 091919 (20191122):1", peak 7333, at 1980.64 , 3.227 sec , sec (Spec # 227859)

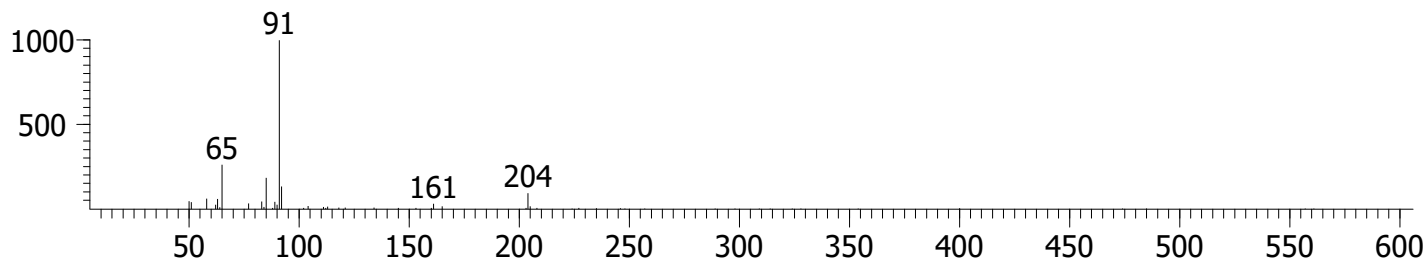

Library Hit - similarity 861, "2,5-Piperazinedione, 3-(phenylmethyl)-"

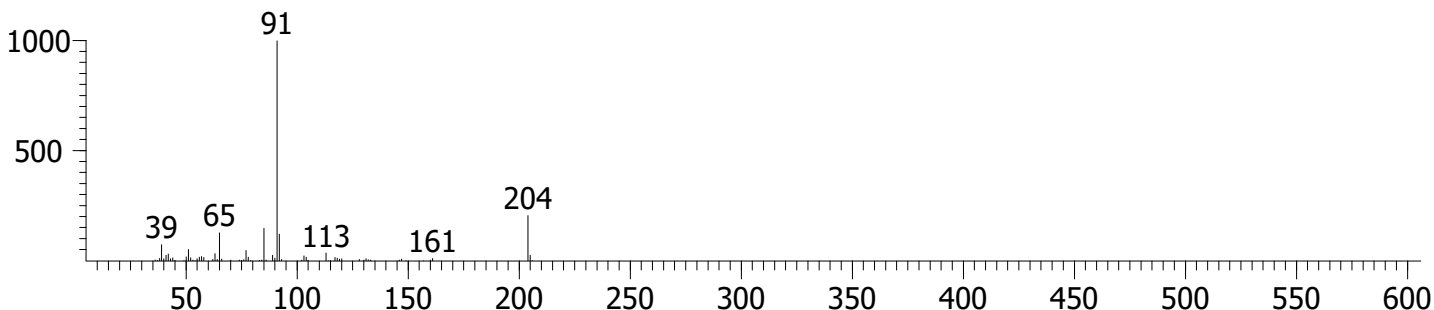

| Hit | Name                                                                                                                        | Similarity | Probability | CAS          | Library | Formula    | Weight |
|-----|-----------------------------------------------------------------------------------------------------------------------------|------------|-------------|--------------|---------|------------|--------|
| 1   | 2,5-Piperazinedione, 3-(phenylmethyl)-                                                                                      | 861        | 2533        | 5037-75-2    | mainlib | C11H12N2O2 | 204    |
| 2   | 2-Benzyloxyethylamine                                                                                                       | 823        | 607         | 38336-04-8   | mainlib | C9H13NO    | 151    |
| 3   | Benzenoacetic acid, phenylmethyl ester                                                                                      | 819        | 512         | 102-16-9     | mainlib | C15H14O2   | 226    |
| 4   | Benzenepropionic acid, 4-benzyloxy-                                                                                         | 813        | 403         | 50463-48-4   | mainlib | C16H16O3   | 256    |
| 5   | 12-Benzyl-4,9,15-trioxa-3,5,8,10,12,14,16-heptaazatetracyclo[11.3.0.0(2,6).0(7,11)]hexadeca-1(16), 2,5,7,10,13-hexaen-3-one | 810        | 356         | 1394125-25-7 | mainlib | C13H7N7O4  | 325    |

## Lumichrome

1st Dimension R.T. = 2421.39  
 2nd Dimension R.T. = 3.214  
 Quant Mass(es) = 242  
 S/N = 121.31  
 Area = 19795  
 Height = 1308.2  
 Similarity = 805

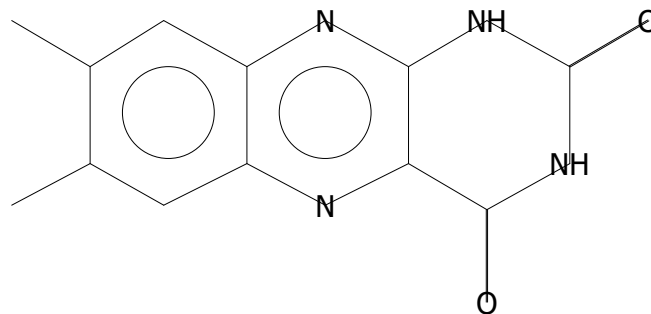

Peak Apex - sample "INF B Comp 091919 (20191122):1", peak 8562, at 2421.39 , 3.214 sec , sec (Spec # 294637)

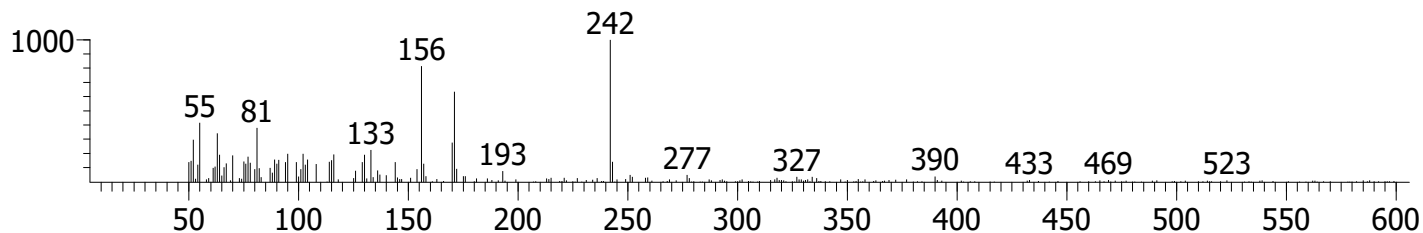

Peak True - sample "INF B Comp 091919 (20191122):1", peak 8562, at 2421.39 , 3.214 sec , sec (Spec # 294637)

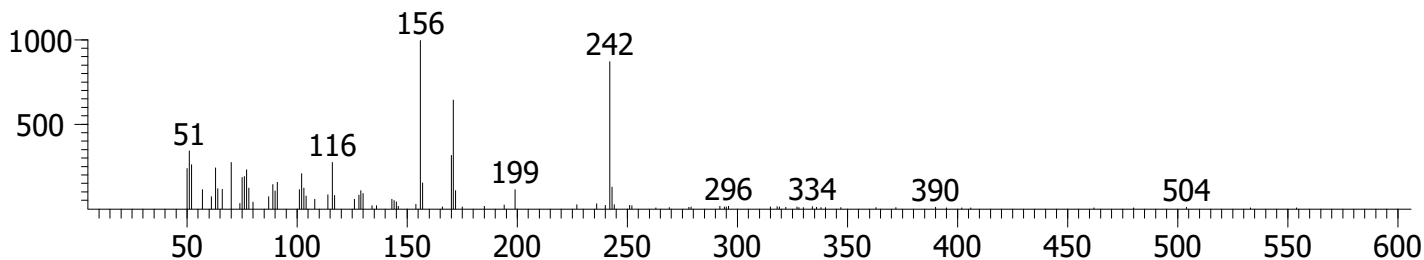

Library Hit - similarity 805, "Lumichrome"

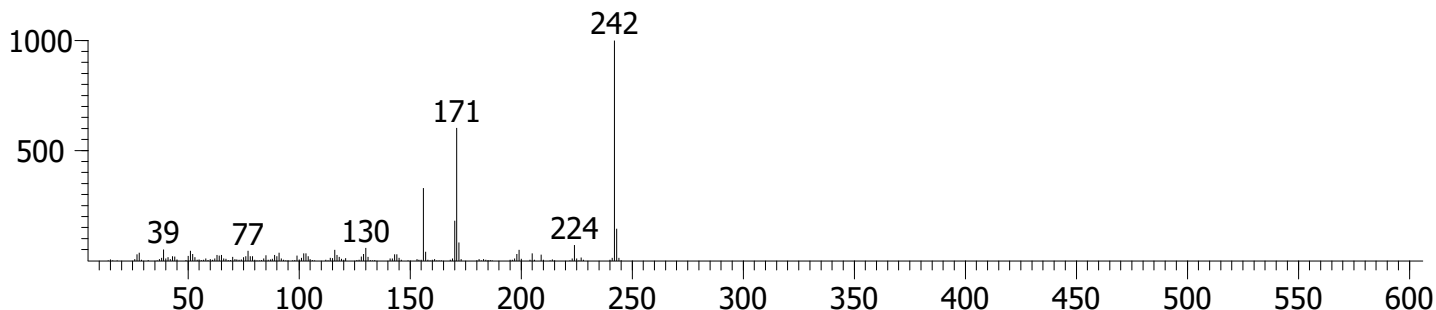

| Hit | Name                                                            | Similarity | Probability | CAS        | Library | Formula                                                       | Weight |
|-----|-----------------------------------------------------------------|------------|-------------|------------|---------|---------------------------------------------------------------|--------|
| 1   | Lumichrome                                                      | 805        | 8751        | 1086-80-2  | mainlib | C <sub>12</sub> H <sub>10</sub> N <sub>4</sub> O <sub>2</sub> | 242    |
| 2   | Quinoline, 2-(1-methylethyl)-                                   | 626        | 161         | 17507-24-3 | mainlib | C <sub>12</sub> H <sub>13</sub> N                             | 171    |
| 3   | 1,2,3,3a-Tetrahydropentalene, 1,1-dimethyl-3-cyanomethylene-    | 619        | 123         | 0-00-0     | mainlib | C <sub>12</sub> H <sub>13</sub> N                             | 171    |
| 4   | 1,4-Dihydro-1,2-dimethylquinolin-4-ylidenemethane               | 613        | 96          | 0-00-0     | mainlib | C <sub>12</sub> H <sub>13</sub> N                             | 171    |
| 5   | (7-Isopropylidenebicyclo[2.2.1]hept-5-en-2-ylidene)acetonitrile | 605        | 72          | 0-00-0     | mainlib | C <sub>12</sub> H <sub>13</sub> N                             | 171    |

## N-Methylmaleimide

1st Dimension R.T. = 507.984  
2nd Dimension R.T. = 1.749  
Quant Mass(es) = 54  
S/N = 101.03  
Area = 19339  
Height = 2616.2  
Similarity = 858

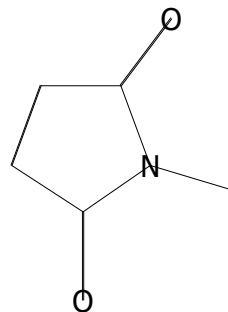

Peak Apex - sample "AerMBR B 091919 (20191119):1", peak 62, at 507.984 , 1.749 sec , sec (Spec # 4505)

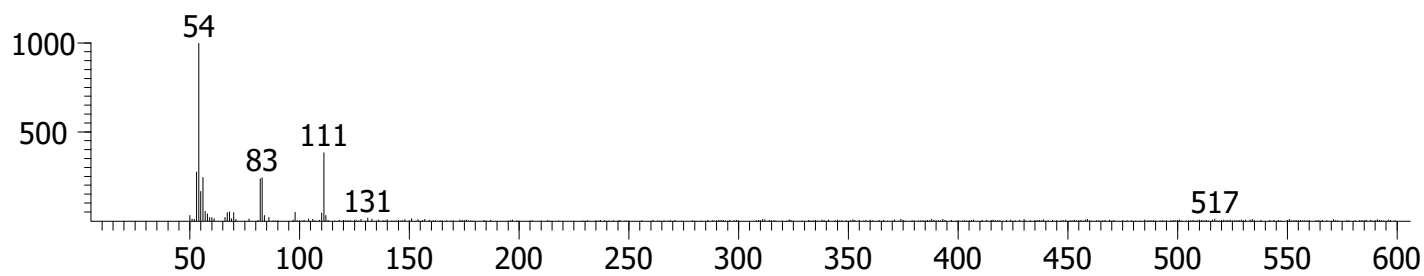

Peak True - sample "AerMBR B 091919 (20191119):1", peak 62, at 507.984 , 1.749 sec , sec (Spec # 4505)

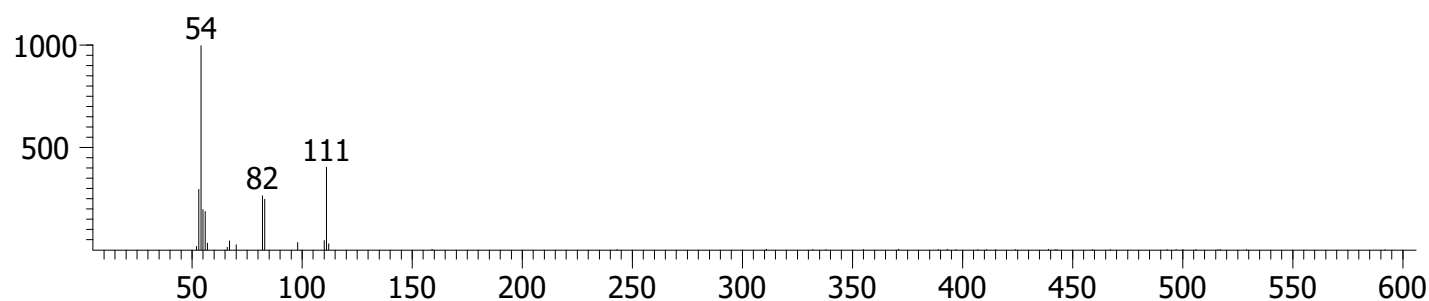

Library Hit - similarity 858, "N-Methylmaleimide"

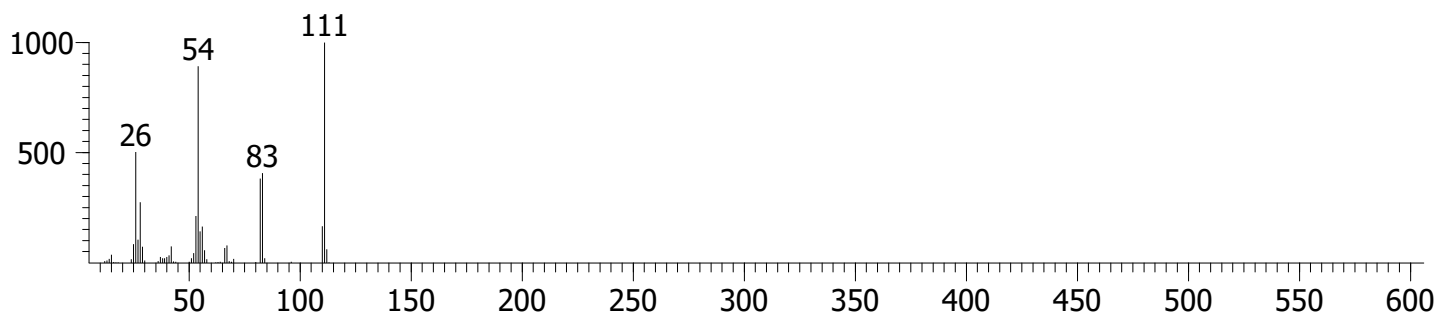

| Hit | Name                                    | Similarity | Probability | CAS        | Library | Formula | Weight |
|-----|-----------------------------------------|------------|-------------|------------|---------|---------|--------|
| 1   | N-Methylmaleimide                       | 858        | 9405        | 930-88-1   | mainlib | C5H5NO2 | 111    |
| 2   | 4(1H)-Pyridinone, 2,3-dihydro-1-methyl- | 644        | 94          | 35488-00-7 | mainlib | C6H9NO  | 111    |
| 3   | 2H-Azepin-2-one, 1,5,6,7-tetrahydro-    | 640        | 79          | 2228-79-7  | mainlib | C6H9NO  | 111    |
| 4   | Cyclohexane, (1-methylpropyl)-          | 622        | 40          | 7058-01-7  | mainlib | C10H20  | 140    |
| 5   | Diaziridine, 3-cyclopropyl-1,2-diethyl- | 617        | 33          | 0-00-0     | mainlib | C8H16N2 | 140    |

Silane, trimethyl-1,2-propadienyl-

1st Dimension R.T. = 532.47  
 2nd Dimension R.T. = 1.505  
 Quant Mass(es) = 73  
 S/N = 113.22  
 Area = 33900  
 Height = 3882.0  
 Similarity = 776

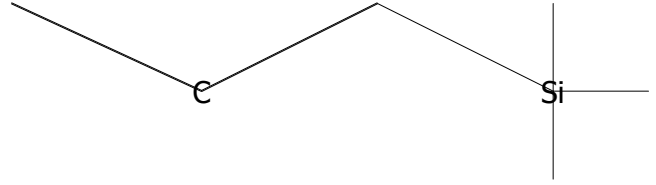

Peak Apex - sample "AerMBR B 091919 (20191119):1", peak 110, at 532.47 , 1.505 sec , sec (Spec # 8178)

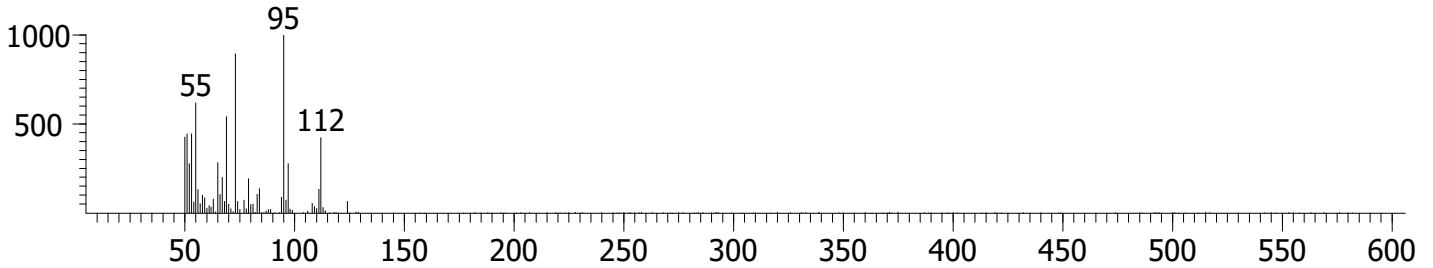

Peak True - sample "AerMBR B 091919 (20191119):1", peak 110, at 532.47 , 1.505 sec , sec (Spec # 8178)

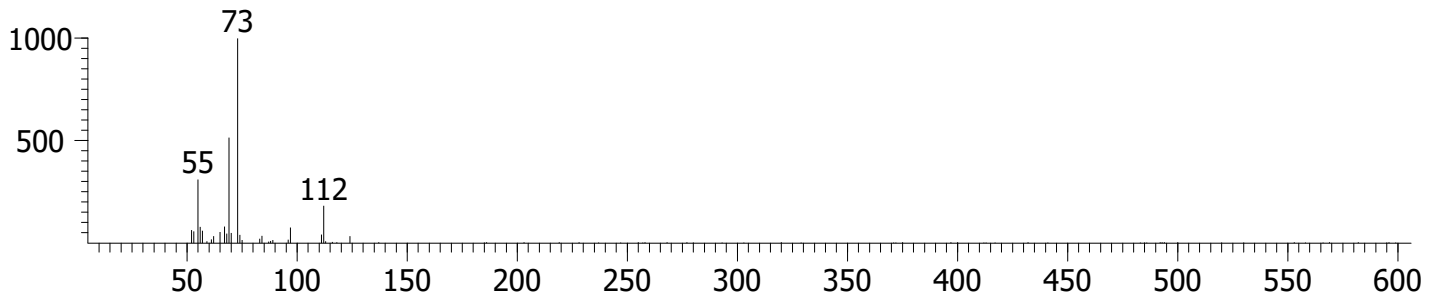

Library Hit - similarity 776, "Silane, trimethyl-1,2-propadienyl-"

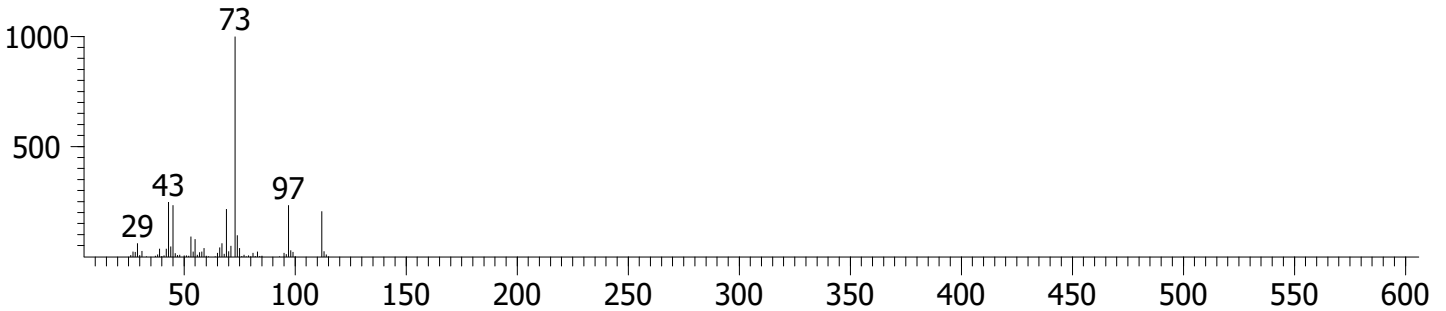

| Hit | Name                                        | Similarity | Probability | CAS        | Library | Formula  | Weight |
|-----|---------------------------------------------|------------|-------------|------------|---------|----------|--------|
| 1   | Silane, trimethyl-1,2-propadienyl-          | 776        | 6571        | 14657-22-8 | mainlib | C6H12Si  | 112    |
| 2   | Silane, trimethyl-2-propynyl-               | 743        | 1720        | 13361-64-3 | mainlib | C6H12Si  | 112    |
| 3   | Acetic acid (3-methoxy-3-methyl)butyl ester | 657        | 153         | 0-00-0     | mainlib | C8H16O3  | 160    |
| 4   | Octanal, 7-methoxy-3,7-dimethyl-            | 655        | 141         | 3613-30-7  | mainlib | C11H22O2 | 186    |
| 5   | 3-Heptene, 2-methyl-, (E)-                  | 654        | 135         | 692-96-6   | mainlib | C8H16    | 112    |



### 3-Hexen-2-one, 3,4-dimethyl-

1st Dimension R.T. = 626.916  
2nd Dimension R.T. = 1.610  
Quant Mass(es) = 83  
S/N = 57.756  
Area = 8002.5  
Height = 1185.8  
Similarity = 761

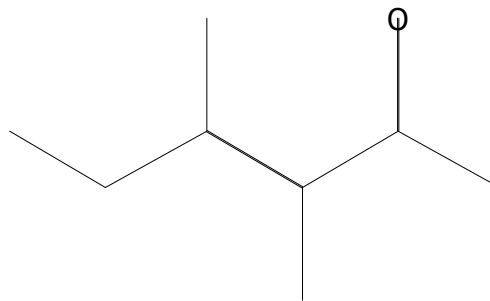

Peak Apex - sample "AerMBR B 091919 (20191119):1", peak 321, at 626.916 , 1.610 sec , sec (Spec # 22504 )

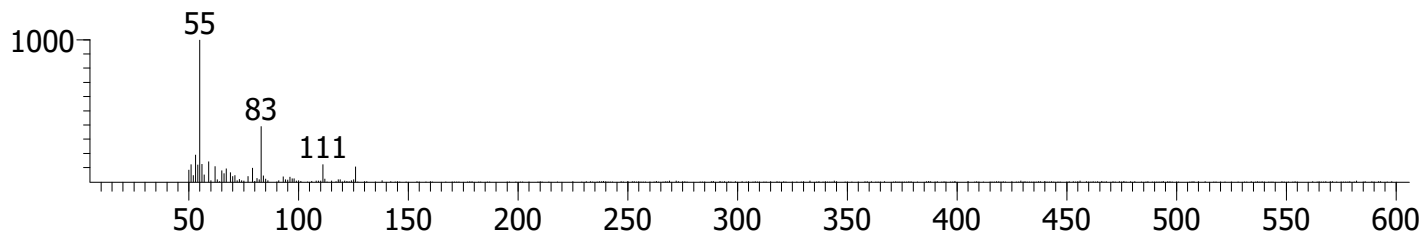

Peak True - sample "AerMBR B 091919 (20191119):1", peak 321, at 626.916 , 1.610 sec , sec (Spec # 22504)

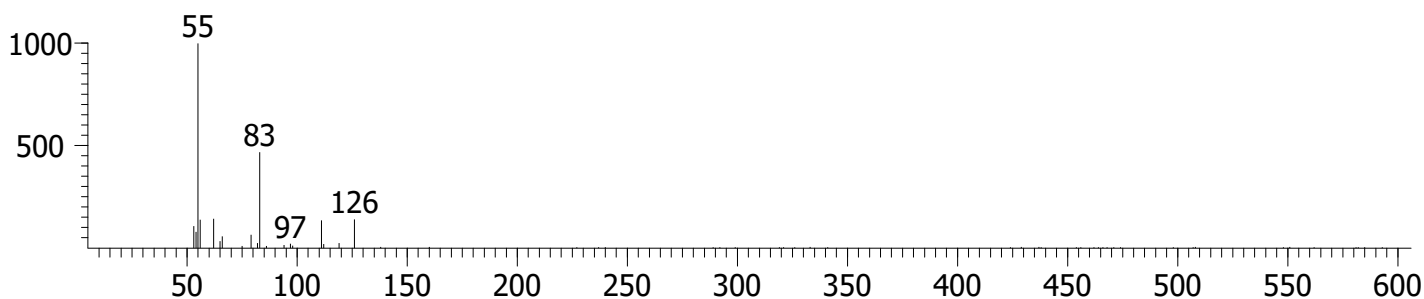

Library Hit - similarity 761, "3-Hexen-2-one, 3,4-dimethyl-"

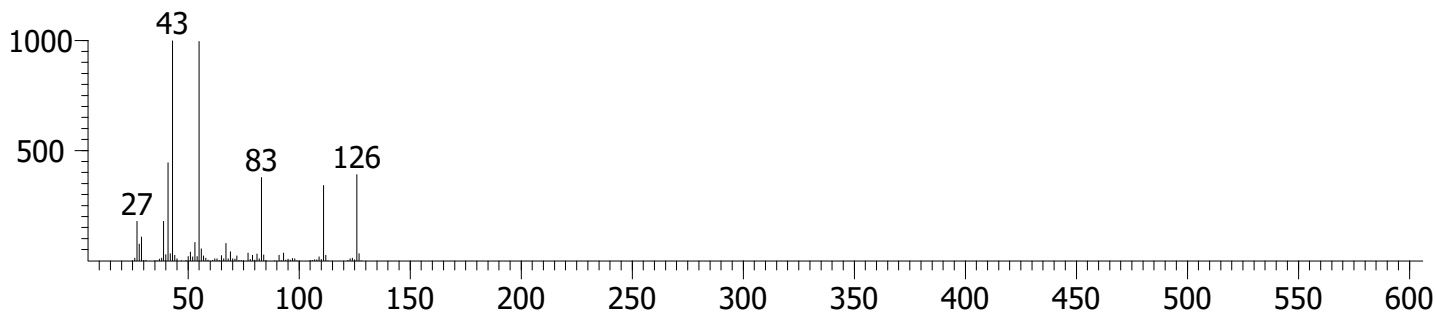

| Hit | Name                              | Similarity | Probability | CAS        | Library | Formula | Weight |
|-----|-----------------------------------|------------|-------------|------------|---------|---------|--------|
| 1   | 3-Hexen-2-one, 3,4-dimethyl-      | 761        | 4491        | 1635-02-5  | mainlib | C8H14O  | 126    |
| 2   | 4-Hexen-2-one, 3,4-dimethyl-      | 733        | 1297        | 53252-21-4 | mainlib | C8H14O  | 126    |
| 3   | 3-Penten-2-one, 3-ethyl-4-methyl- | 727        | 1019        | 22287-11-2 | mainlib | C8H14O  | 126    |
| 4   | 3,3-Dimethylhex-5-en-2-one        | 713        | 638         | 0-00-0     | mainlib | C8H14O  | 126    |
| 5   | 2-Hexanone, 3-methyl-4-methylene- | 705        | 476         | 20690-71-5 | mainlib | C8H14O  | 126    |

S-Methyl methanethiosulphonate

1st Dimension R.T. = 682.884  
 2nd Dimension R.T. = 2.290  
 Quant Mass(es) = 126  
 S/N = 64.627  
 Area = 11880  
 Height = 1315.4  
 Similarity = 853

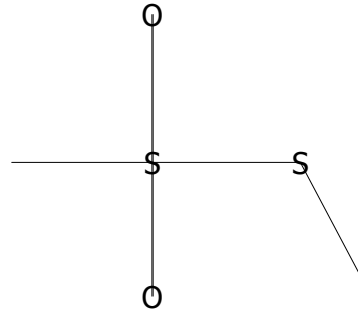

Peak Apex - sample "AerMBR B 091919 (20191119):1", peak 450, at 682.884 , 2.290 sec , sec (Spec # 31087 )

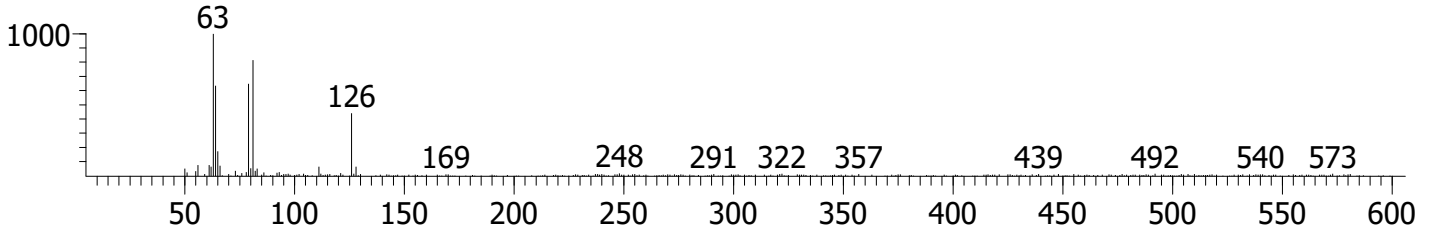

Peak True - sample "AerMBR B 091919 (20191119):1", peak 450, at 682.884 , 2.290 sec , sec (Spec # 31087)

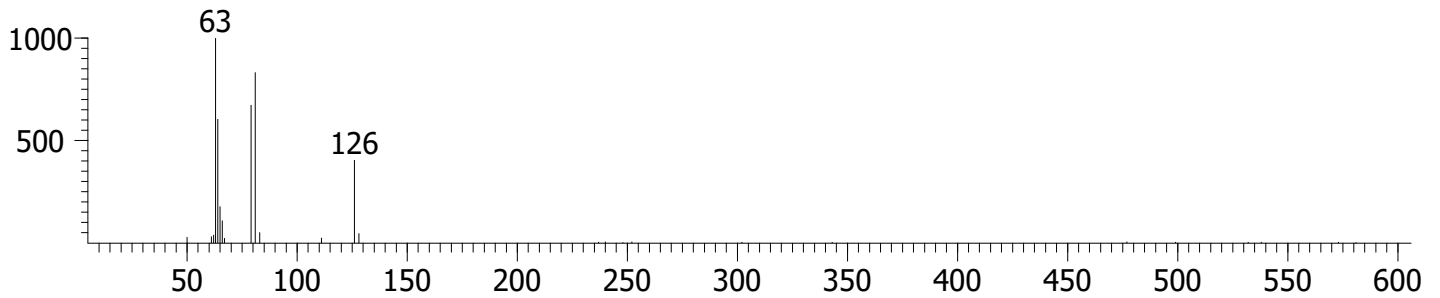

Library Hit - similarity 853, "S-Methyl methanethiosulphonate"

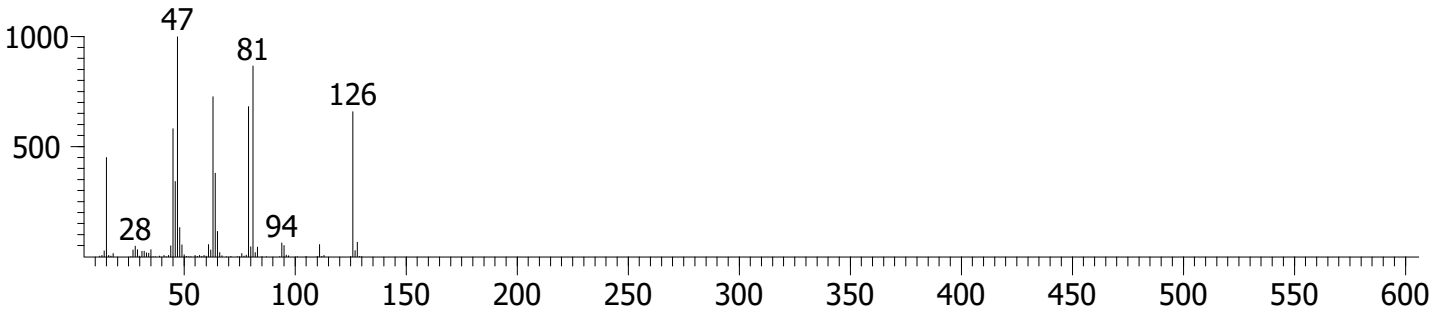

| Hit | Name                                        | Similarity | Probability | CAS         | Library | Formula  | Weight |
|-----|---------------------------------------------|------------|-------------|-------------|---------|----------|--------|
| 1   | S-Methyl methanethiosulphonate              | 853        | 9722        | 2949-92-0   | mainlib | C2H6O2S2 | 126    |
| 2   | Methylphosphinic acid, ethyl ester          | 601        | 97          | 16391-07-4  | mainlib | C3H9O2P  | 108    |
| 3   | 2-Cyclopentene-1-carboxylic acid, 1-methyl- | 600        | 93          | 68317-77-1  | mainlib | C7H10O2  | 126    |
| 4   | 2-Methanesulfonylethanol                    | 558        | 20          | 15205-66-0  | mainlib | C3H8O3S  | 124    |
| 5   | 2-Propanol, 1-chloro-3-fluoro-              | 540        | 10          | 189937-18-6 | mainlib | C3H6ClFO | 112    |

4-Isopropyl-1-methylcyclohex-2-enol

1st Dimension R.T. = 714.366  
 2nd Dimension R.T. = 1.379  
 Quant Mass(es) = 79  
 S/N = 255.45  
 Area = 80238  
 Height = 9112.3  
 Similarity = 829

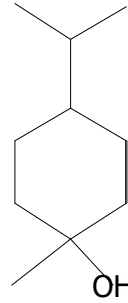

Peak Apex - sample "AerMBR C 091919 (20191119):1", peak 515, at 714.366 , 1.379 sec , sec (Spec # 35719 )

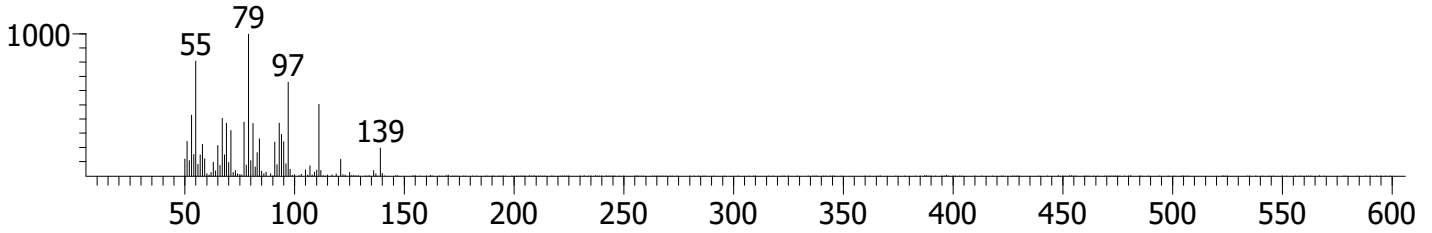

Peak True - sample "AerMBR C 091919 (20191119):1", peak 515, at 714.366 , 1.379 sec , sec (Spec # 35719)

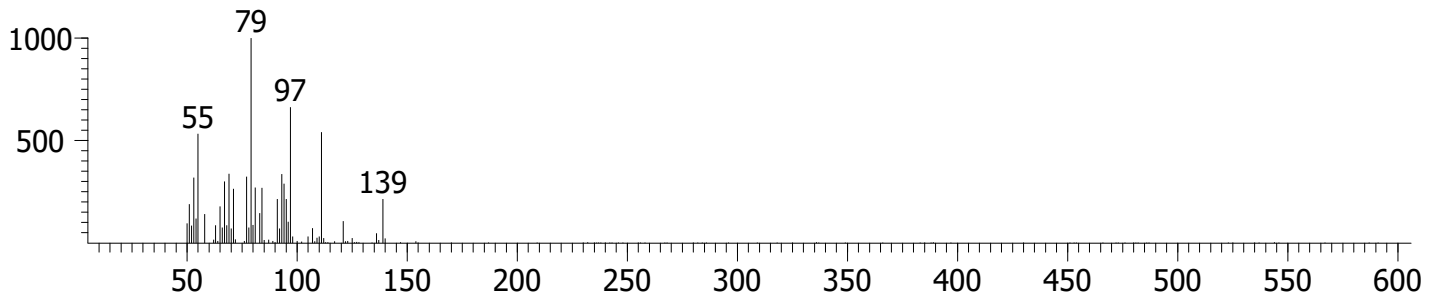

Library Hit - similarity 829, "4-Isopropyl-1-methylcyclohex-2-enol"

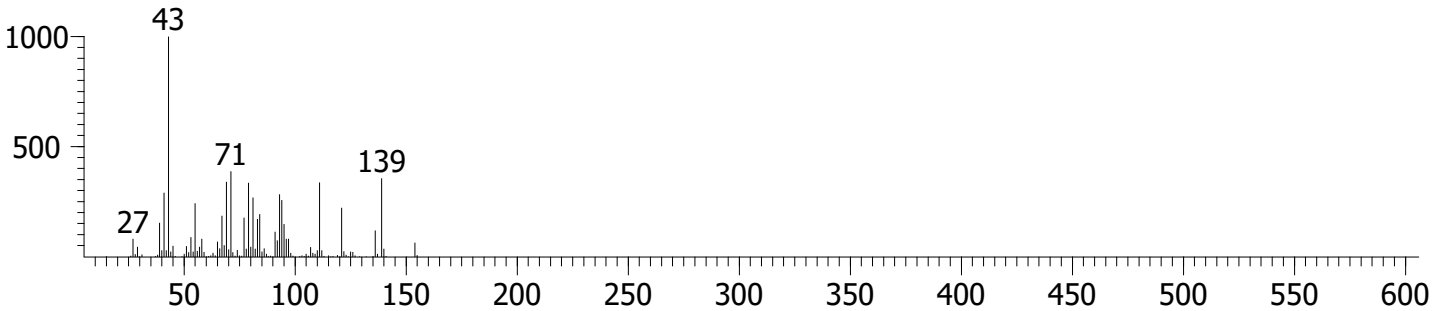

| Hit | Name                                                   | Similarity | Probability | CAS        | Library | Formula | Weight |
|-----|--------------------------------------------------------|------------|-------------|------------|---------|---------|--------|
| 1   | 4-Isopropyl-1-methylcyclohex-2-enol                    | 829        | 3811        | 619-62-5   | mainlib | C10H18O | 154    |
| 2   | 2-Cyclohexen-1-ol, 1-methyl-4-(1-methylethyl)-, trans- | 826        | 3368        | 29803-81-4 | mainlib | C10H18O | 154    |
| 3   | Cyclohexanol, 1-methyl-4-(1-methylethenyl)-, cis-      | 791        | 845         | 7299-41-4  | mainlib | C10H18O | 154    |
| 4   | 2-Cyclohexen-1-ol, 1-methyl-4-(1-methylethyl)-, cis-   | 790        | 812         | 29803-82-5 | mainlib | C10H18O | 154    |
| 5   | 5-Isopropyl-2-methylbicyclo[3.1.0]hexan-2-ol#          | 761        | 230         | 546-79-2   | mainlib | C10H18O | 154    |

# 1,4-Cyclohexanedione

1st Dimension R.T. = 714.366  
2nd Dimension R.T. = 2.350  
Quant Mass(es) = 112  
S/N = 76.629  
Area = 10407  
Height = 1294.8  
Similarity = 840

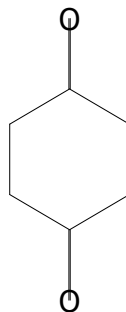

Peak Apex - sample "AerMBR B 091919 (20191119):1", peak 525, at 714.366 , 2.350 sec , sec (Spec # 35866 )

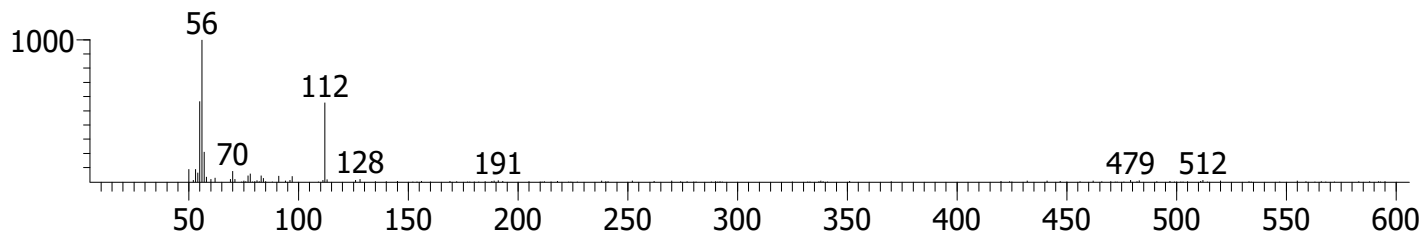

Peak True - sample "AerMBR B 091919 (20191119):1", peak 525, at 714.366 , 2.350 sec , sec (Spec # 35866)

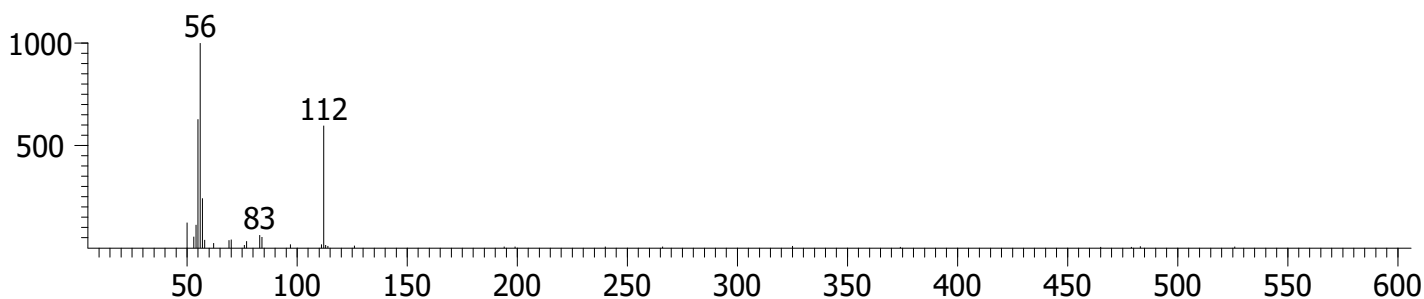

Library Hit - similarity 840, "1,4-Cyclohexanedione"

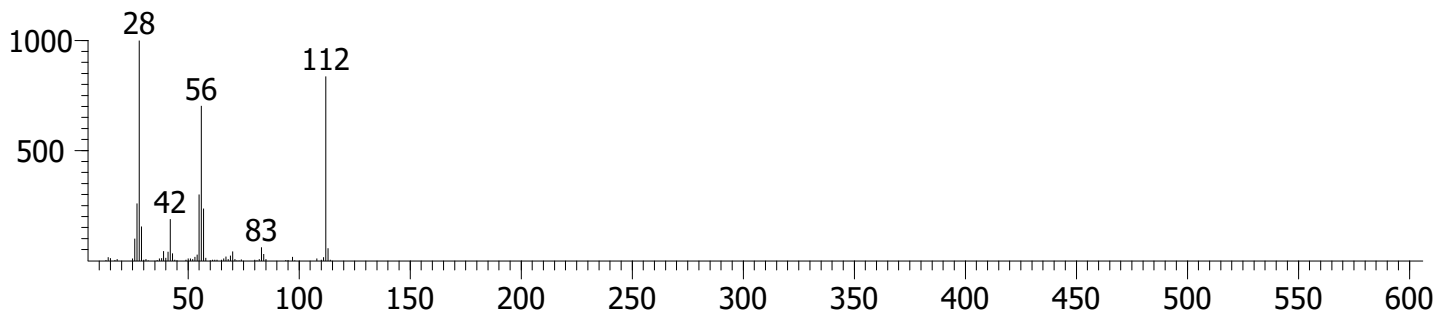

| Hit | Name                                | Similarity | Probability | CAS        | Library | Formula | Weight |
|-----|-------------------------------------|------------|-------------|------------|---------|---------|--------|
| 1   | 1,4-Cyclohexanedione                | 840        | 6542        | 637-88-7   | mainlib | C6H8O2  | 112    |
| 2   | 3-Methylpyridazin-5-one             | 795        | 1393        | 0-00-0     | mainlib | C5H8N2O | 112    |
| 3   | 2-Heptene, 5-methyl-                | 767        | 402         | 22487-87-2 | mainlib | C8H16   | 112    |
| 4   | 1,6-Dioxaspiro[4.4]nonane-2,7-dione | 764        | 355         | 3505-67-7  | mainlib | C7H8O4  | 156    |
| 5   | 1-Hexene, 2,5-dimethyl-             | 725        | 83          | 6975-92-4  | mainlib | C8H16   | 112    |

# 4H-1,2,4-Triazol-3-amine, 4-ethyl-

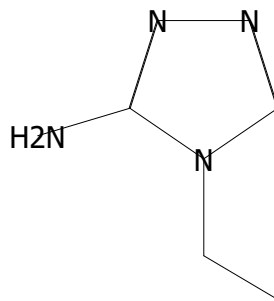

1st Dimension R.T. = 843.792

2nd Dimension R.T. = 1.591

Quant Mass(es) = 112

S/N = 198.76

Area = 14993

Height = 2101.8

Similarity = 920

Peak Apex - sample "AerMBR B 091919 (20191119):1", peak 768, at 843.792 , 1.591 sec , sec (Spec # 55361 )

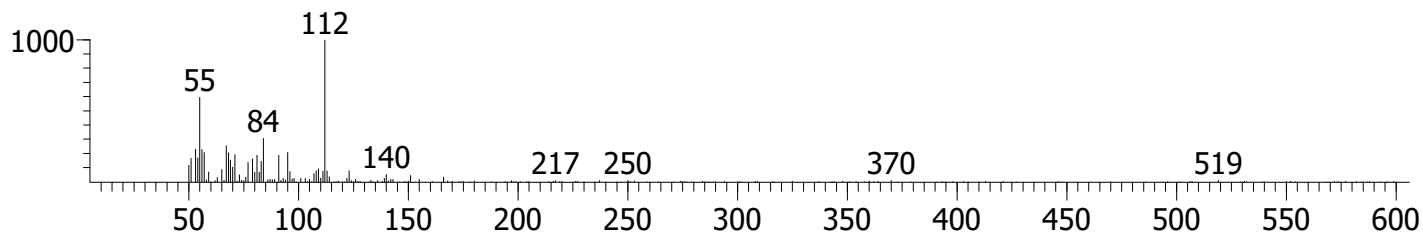

Peak True - sample "AerMBR B 091919 (20191119):1", peak 768, at 843.792 , 1.591 sec , sec (Spec # 55361)

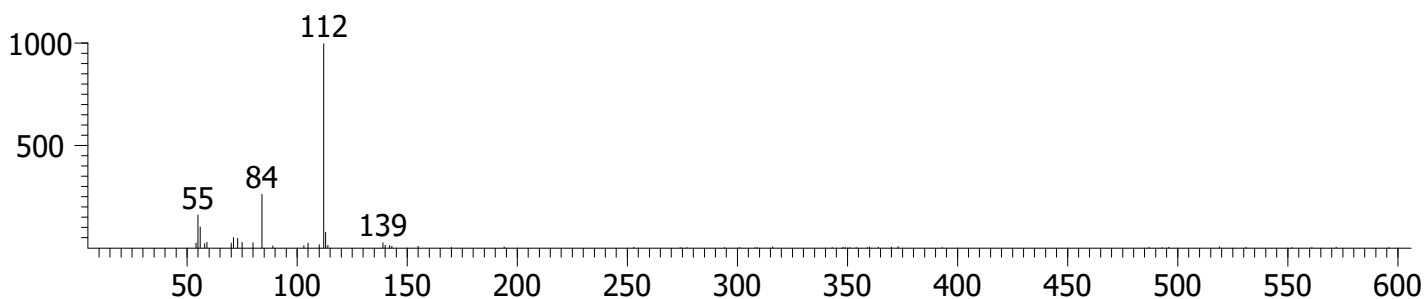

Library Hit - similarity 920, "4H-1,2,4-Triazol-3-amine, 4-ethyl-"

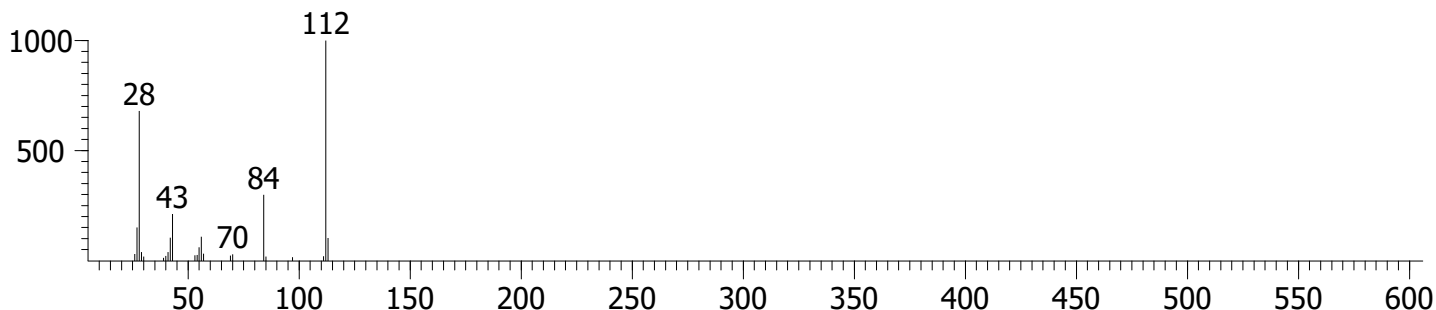

| Hit | Name                                                                                                         | Similarity | Probability | CAS        | Library | Formula   | Weight |
|-----|--------------------------------------------------------------------------------------------------------------|------------|-------------|------------|---------|-----------|--------|
| 1   | 4H-1,2,4-Triazol-3-amine, 4-ethyl-                                                                           | 920        | 3941        | 42786-06-1 | mainlib | C4H8N4    | 112    |
| 2   | 1-Phenethyl-4-piperidone                                                                                     | 889        | 1074        | 39742-60-4 | mainlib | C13H17NO  | 203    |
| 3   | 2-Pyrrolidinecarboxylic acid, 1,2-dimethyl-5-oxo-, methyl ester                                              | 889        | 1074        | 56145-23-4 | mainlib | C8H13NO3  | 171    |
| 4   | 2,2-Dimethyl-N-ethylpyrrolidine                                                                              | 883        | 844         | 89214-93-7 | mainlib | C8H17N    | 127    |
| 5   | 2H-Benzo[f][oxireno[2,3-E]benzofuran-8(9H)-one, 9-[(hexahydro-1H-azepin-1-yl)methyl]octahydro-2,5a-dimethyl- | 870        | 545         | 0-00-0     | mainlib | C21H33NO3 | 347    |

# 1,3-Cyclohexanedione, 2,5,5-trimethyl-

1st Dimension R.T. = 945.234  
2nd Dimension R.T. = 1.696  
Quant Mass(es) = 56  
S/N = 123.91  
Area = 35148  
Height = 3849.8  
Similarity = 642

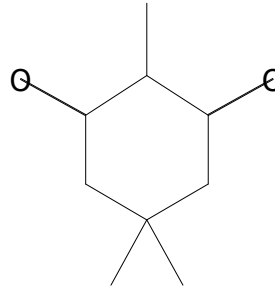

Peak Apex - sample "AerMBR B 091919 (20191119):1", peak 946, at 945.234 , 1.696 sec , sec (Spec # 70747 )

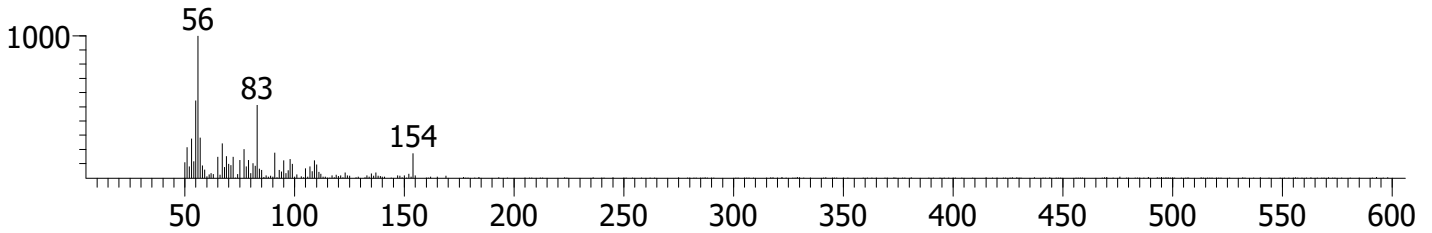

Peak True - sample "AerMBR B 091919 (20191119):1", peak 946, at 945.234 , 1.696 sec , sec (Spec # 70747)

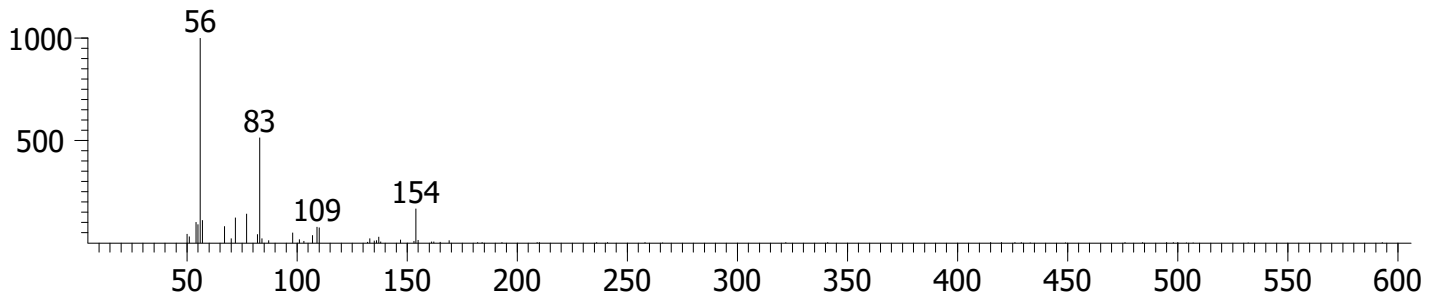

Library Hit - similarity 642, "1,3-Cyclohexanedione, 2,5,5-trimethyl-"

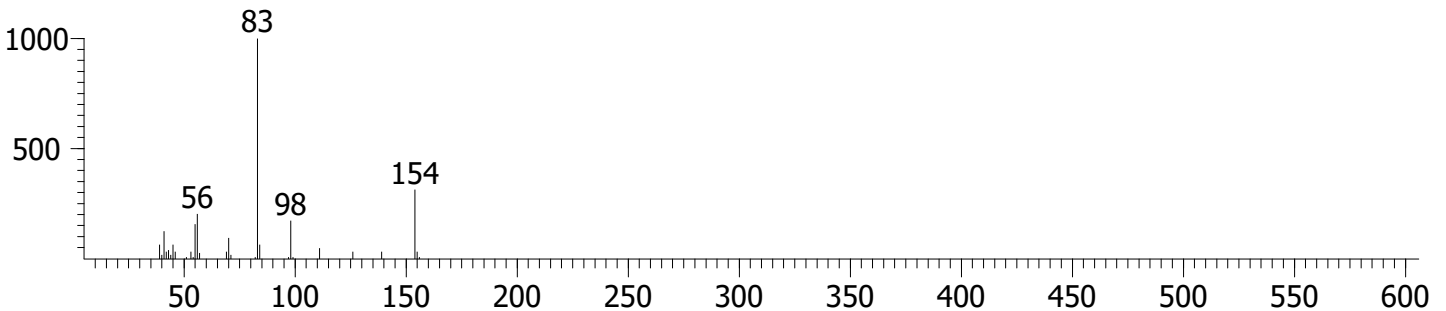

| Hit | Name                                                                          | Similarity | Probability | CAS        | Library | Formula   | Weight |
|-----|-------------------------------------------------------------------------------|------------|-------------|------------|---------|-----------|--------|
| 1   | 1,3-Cyclohexanedione, 2,5,5-trimethyl-                                        | 642        | 5434        | 1125-11-7  | mainlib | C9H14O2   | 154    |
| 2   | Propanenitrile, 2-(dimethylamino)-                                            | 616        | 1628        | 5350-67-4  | mainlib | C5H10N2   | 98     |
| 3   | Cyclotridecanamine                                                            | 551        | 262         | 5266-81-9  | mainlib | C13H27N   | 197    |
| 4   | 5-Methyl-6-phenyl-2-(((propan-2-ylidene)amino)oxy)pyridine-3,4-dicarbonitrile | 551        | 262         | 0-00-0     | mainlib | C17H14N4O | 290    |
| 5   | 2-Ethylthiolane, S,S-dioxide                                                  | 549        | 241         | 10178-59-3 | mainlib | C6H12O2S  | 148    |

### 3,5-Octadiene, 4,5-diethyl-

1st Dimension R.T. = 1025.69  
2nd Dimension R.T. = 1.855  
Quant Mass(es) = 166  
S/N = 158.49  
Area = 10675  
Height = 1352.6  
Similarity = 735

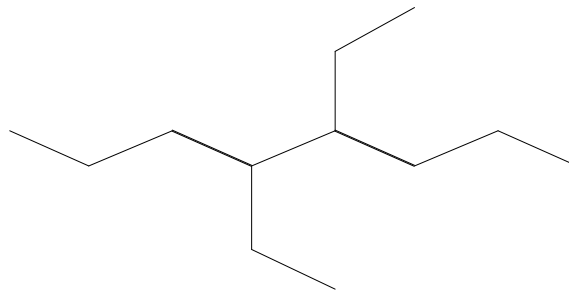

Peak Apex - sample "AerMBR B 091919 (20191119):1", peak 1154, at 1025.69 , 1.855 sec , sec (Spec # 8296 1)

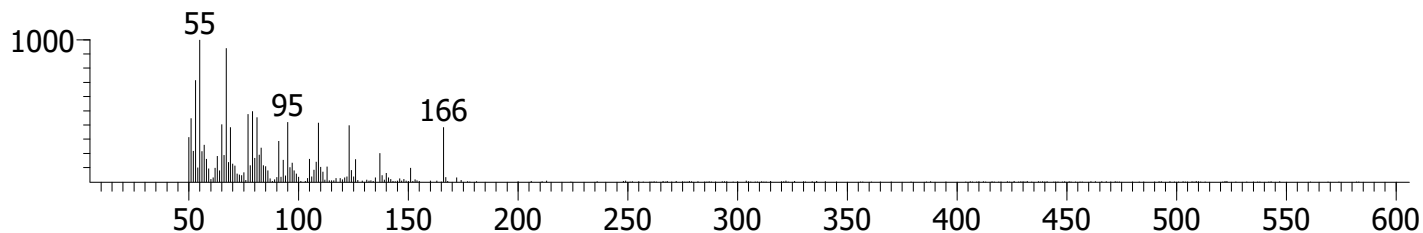

Peak True - sample "AerMBR B 091919 (20191119):1", peak 1154, at 1025.69 , 1.855 sec , sec (Spec # 8296 1)

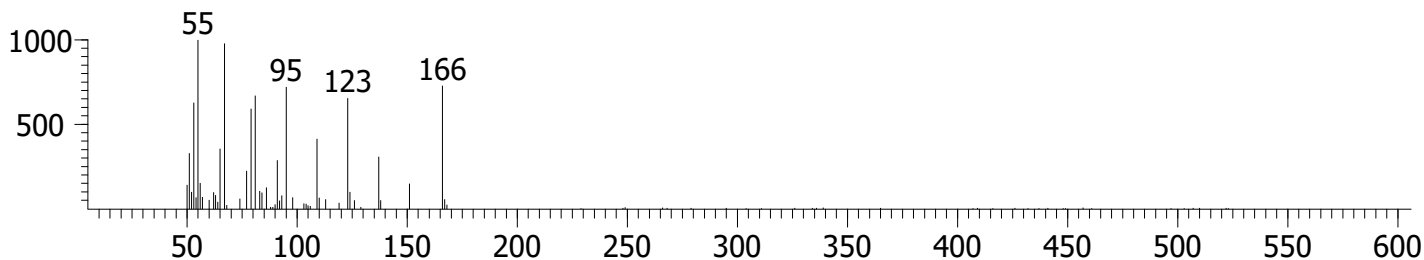

Library Hit - similarity 735, "3,5-Octadiene, 4,5-diethyl-"

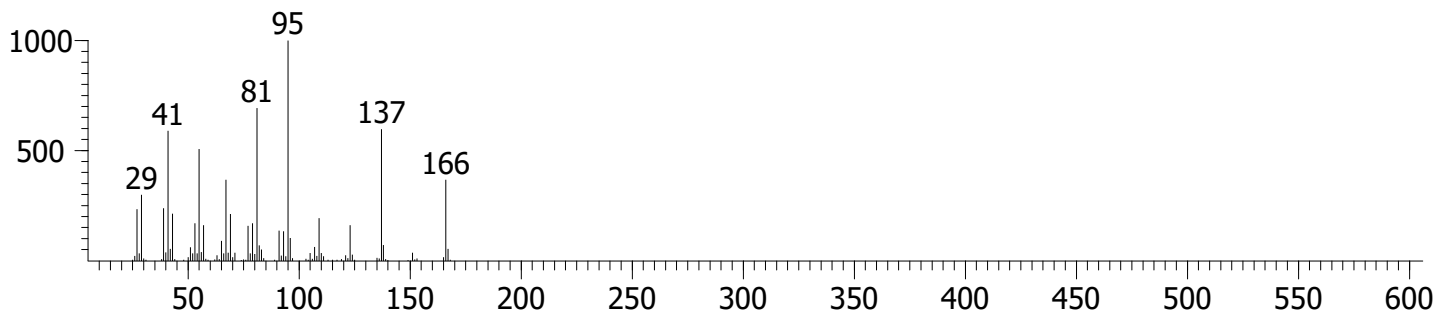

| Hit | Name                                             | Similarity | Probability | CAS         | Library | Formula                           | Weight |
|-----|--------------------------------------------------|------------|-------------|-------------|---------|-----------------------------------|--------|
| 1   | 3,5-Octadiene, 4,5-diethyl-                      | 735        | 3620        | 67652-84-0  | mainlib | C <sub>12</sub> H <sub>22</sub>   | 166    |
| 2   | 3,5-Octadiene, 4,5-diethyl-, (E,Z)-              | 714        | 1540        | 21293-02-7  | mainlib | C <sub>12</sub> H <sub>22</sub>   | 166    |
| 3   | Cycloheptanone, 2-(2-methylpropylidene)-         | 692        | 608         | 120694-89-5 | mainlib | C <sub>11</sub> H <sub>18</sub> O | 166    |
| 4   | trans-Chrysanthamal                              | 678        | 381         | 20104-05-6  | mainlib | C <sub>10</sub> H <sub>16</sub> O | 152    |
| 5   | Ethanone, 1-(2,6,6-trimethyl-1-cyclohexen-1-yl)- | 670        | 284         | 1197-92-8   | mainlib | C <sub>11</sub> H <sub>18</sub> O | 166    |

## 5-Acetyl-4-methylthiazole

1st Dimension R.T. = 1046.68  
 2nd Dimension R.T. = 1.808  
 Quant Mass(es) = 126  
 S/N = 1476.4  
 Area = 341783  
 Height = 34916  
 Similarity = 723

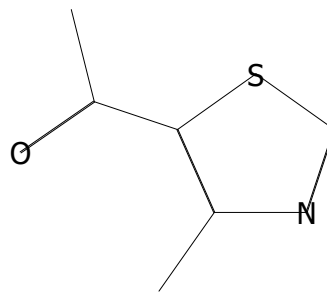

Peak Apex - sample "AerMBR B 091919 (20191119):1", peak 1208, at 1046.68 , 1.808 sec , sec (Spec # 8613 4)

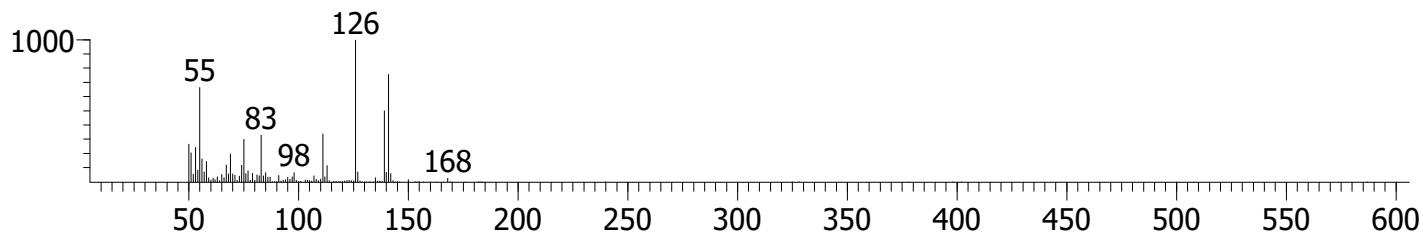

Peak True - sample "AerMBR B 091919 (20191119):1", peak 1208, at 1046.68 , 1.808 sec , sec (Spec # 8613 4)

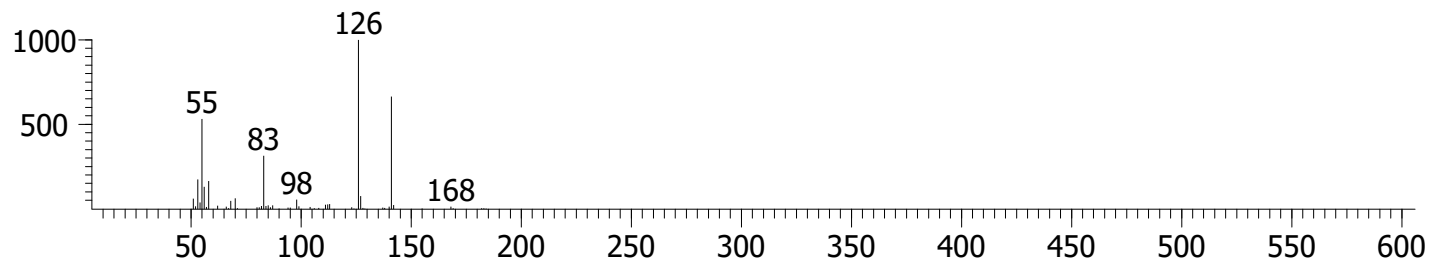

Library Hit - similarity 723, "5-Acetyl-4-methylthiazole"

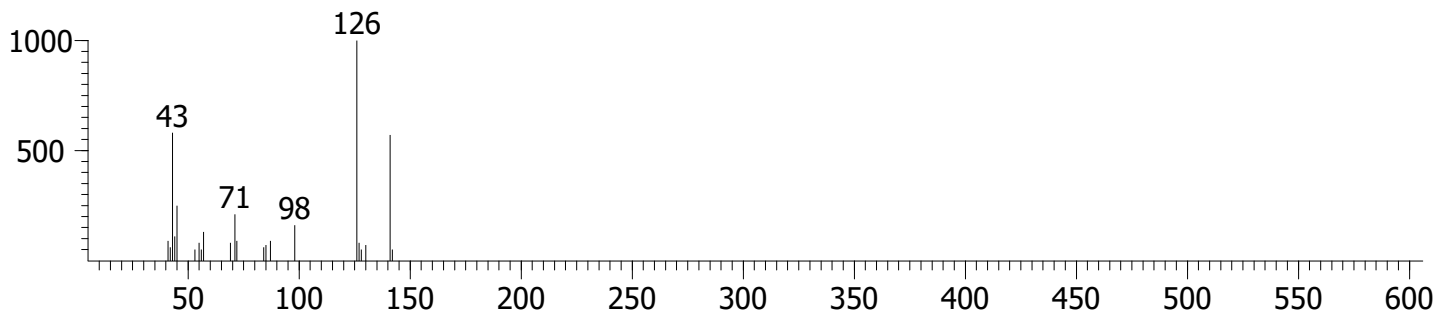

| Hit | Name                                                                                               | Similarity | Probability | CAS         | Library | Formula    | Weight |
|-----|----------------------------------------------------------------------------------------------------|------------|-------------|-------------|---------|------------|--------|
| 1   | 5-Acetyl-4-methylthiazole                                                                          | 723        | 4984        | 38205-55-9  | mainlib | C6H7NOS    | 141    |
| 2   | 3H-Pyrazol-3-one, 2,4-dihydro-2,4,5-trimethyl-                                                     | 668        | 966         | 17826-82-3  | mainlib | C6H10N2O   | 126    |
| 3   | L-Alanine, N-cyclobutylcarbonyl-, hexyl ester                                                      | 647        | 411         | 0-00-0      | mainlib | C14H25NO3  | 255    |
| 4   | 3-Fluoro-p-anisidine                                                                               | 643        | 347         | 366-99-4    | mainlib | C7H8FNO    | 141    |
| 5   | 1-[2-(2-Methyl-5-oxo-4-propyl-tetrahydro-furan-2-yl)-2-oxo-ethyl]-1,2-dihydro-pyridazine-3,6-dione | 640        | 307         | 300701-65-9 | mainlib | C14H18N2O5 | 294    |



# 1,2,3,4-Tetramethoxybenzene

1st Dimension R.T. = 1155.11  
2nd Dimension R.T. = 1.855  
Quant Mass(es) = 183  
S/N = 195.44  
Area = 18462  
Height = 2155.4  
Similarity = 746

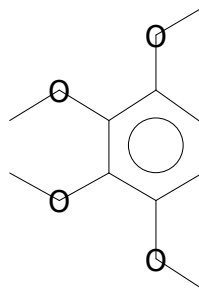

Peak Apex - sample "AerMBR B 091919 (20191119):1", peak 1499, at 1155.11 , 1.855 sec , sec (Spec # 1025 71)

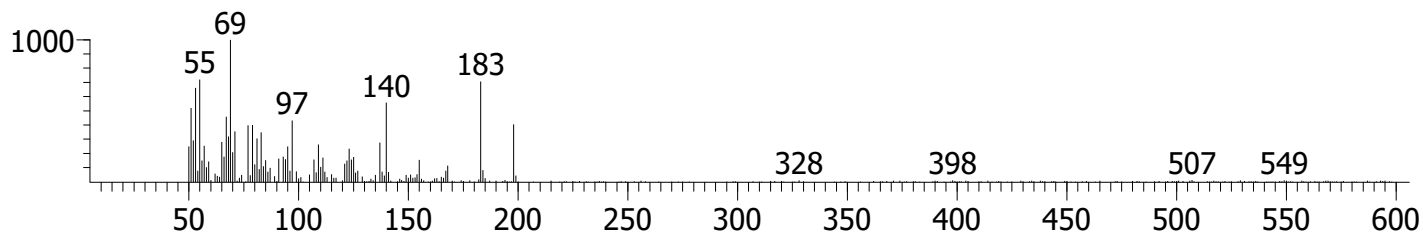

Peak True - sample "AerMBR B 091919 (20191119):1", peak 1499, at 1155.11 , 1.855 sec , sec (Spec # 1025 71)

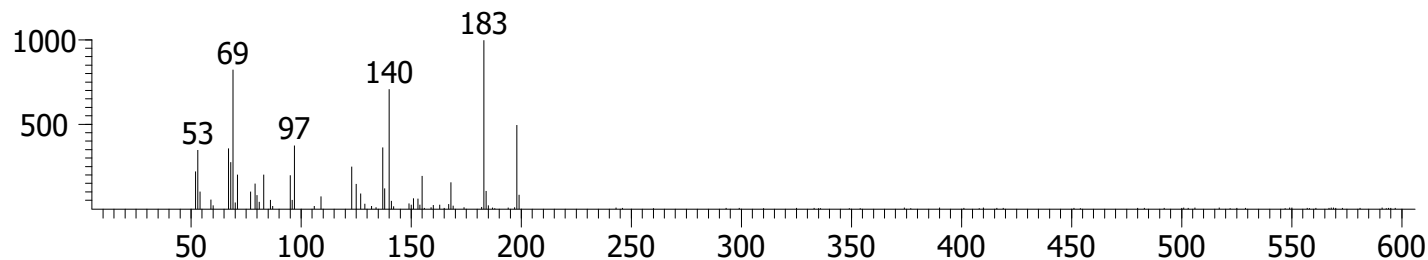

Library Hit - similarity 746, "1,2,3,4-Tetramethoxybenzene"

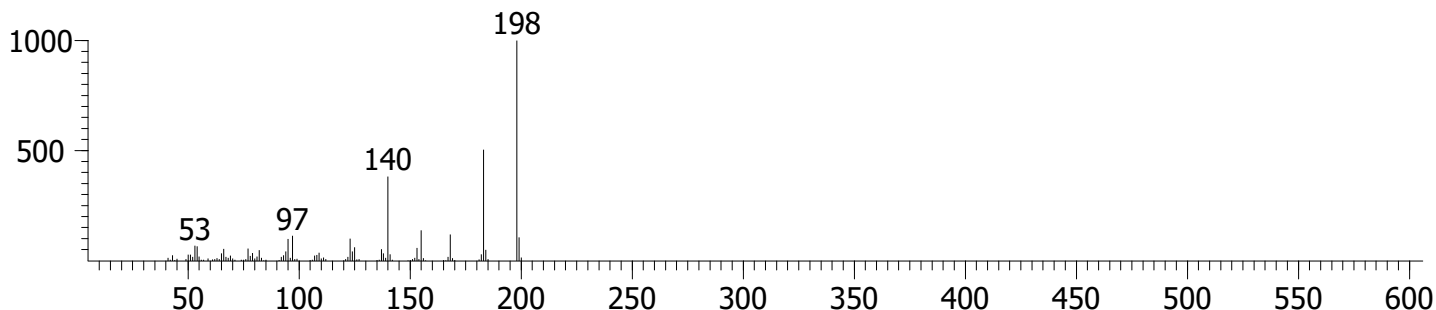

| Hit | Name                                                              | Similarity | Probability | CAS        | Library | Formula    | Weight |
|-----|-------------------------------------------------------------------|------------|-------------|------------|---------|------------|--------|
| 1   | 1,2,3,4-Tetramethoxybenzene                                       | 746        | 8288        | 21450-56-6 | mainlib | C10H14O4   | 198    |
| 2   | 3-Hydroxy-4,5-dimethoxybenzoic acid                               | 632        | 503         | 1916-08-1  | mainlib | C9H10O5    | 198    |
| 3   | Aminoacetic acid, 2-(2-fluoro-4,5-dimethoxybenzoyl)-, ethyl ester | 612        | 229         | 0-00-0     | mainlib | C13H16FNO5 | 285    |
| 4   | 2,5-dimethoxyphenylethylsulfide                                   | 605        | 175         | 0-00-0     | mainlib | C10H14O2S  | 198    |
| 5   | Benzenemethanol, 3,4,5-trimethoxy-                                | 603        | 162         | 3840-31-1  | mainlib | C10H14O4   | 198    |

## Pyridine, 2-phenyl-

1st Dimension R.T. = 1221.58

2nd Dimension R.T. = 2.105

Quant Mass(es) = 155

S/N = 67.412

Area = 4985.9

Height = 636.56

Similarity = 586

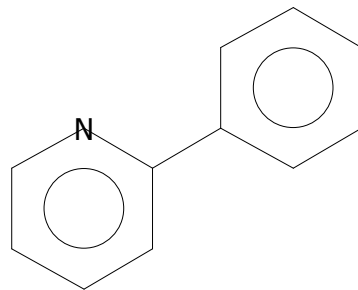

Peak Apex - sample "AerMBR B 091919 (20191119):1", peak 1700, at 1221.58 , 2.105 sec , sec (Spec # 1126 79)

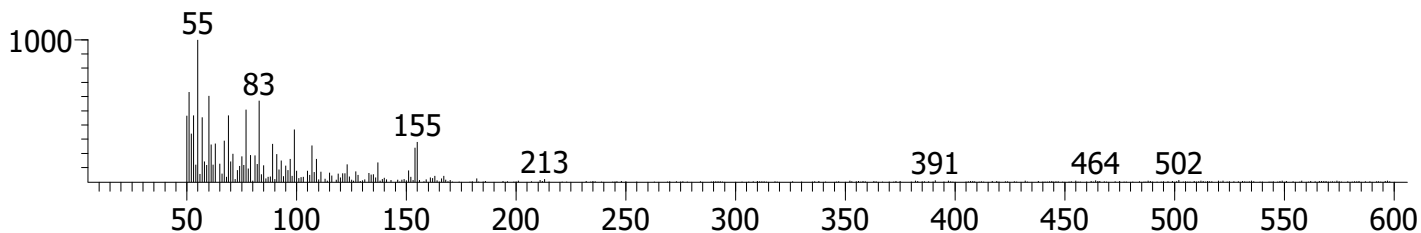

Peak True - sample "AerMBR B 091919 (20191119):1", peak 1700, at 1221.58 , 2.105 sec , sec (Spec # 1126 79)

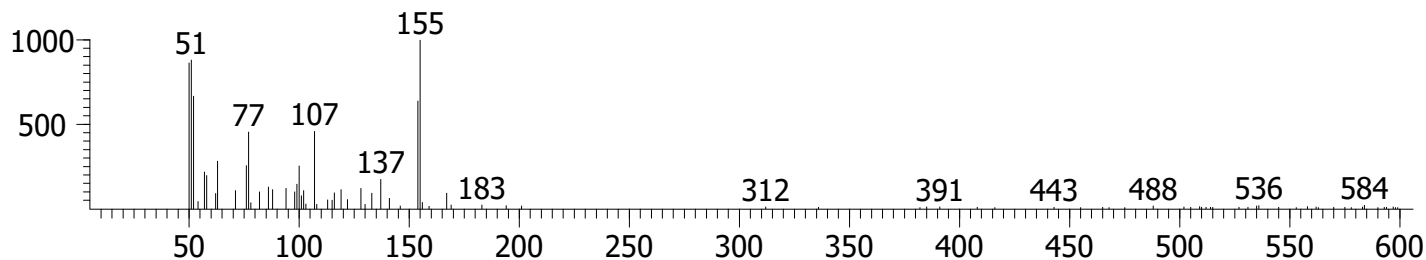

Library Hit - similarity 586, "Pyridine, 2-phenyl-"

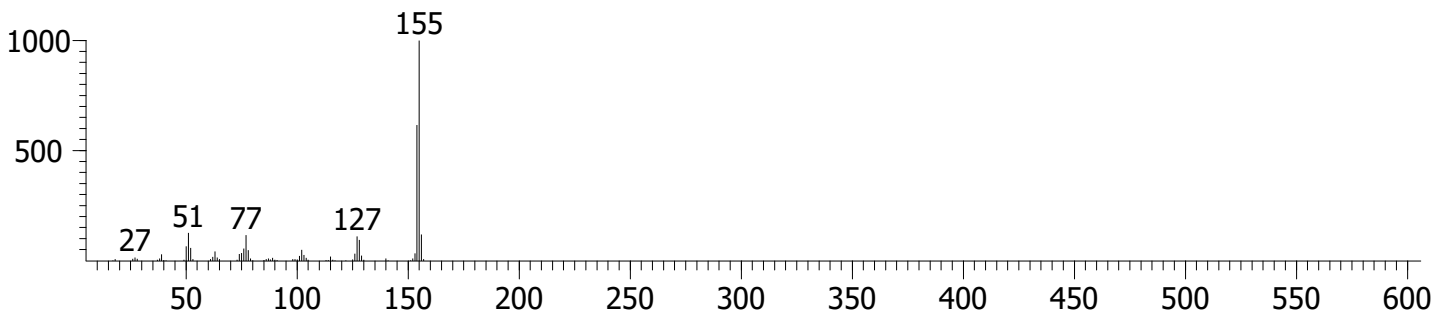

| Hit | Name                                      | Similarity | Probability | CAS        | Library | Formula   | Weight |
|-----|-------------------------------------------|------------|-------------|------------|---------|-----------|--------|
| 1   | Pyridine, 2-phenyl-                       | 586        | 2765        | 1008-89-5  | mainlib | C11H9N    | 155    |
| 2   | Pyridinium, 1-methyl-2-phenyl-, iodide    | 565        | 1176        | 52806-02-7 | mainlib | C12H12IN  | 297    |
| 3   | Pyridine, 4-phenyl-                       | 563        | 1085        | 939-23-1   | mainlib | C11H9N    | 155    |
| 4   | Pyridine, 3-phenyl-                       | 559        | 916         | 1008-88-4  | mainlib | C11H9N    | 155    |
| 5   | 4-Phenylpyridinium bromide, 1-allylidene- | 559        | 916         | 57167-61-0 | mainlib | C14H14BrN | 275    |

2,7:3,6-Dimethano-2H-1-benzopyran,  
octahydro-

1st Dimension R.T. = 1249.56  
2nd Dimension R.T. = 2.303  
Quant Mass(es) = 81  
S/N = 102.19  
Area = 25692  
Height = 2469.4  
Similarity = 732

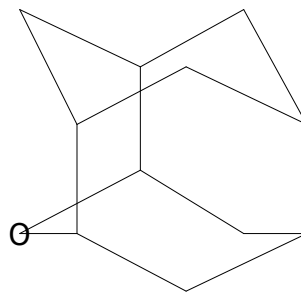

Peak Apex - sample "AerMBR B 091919 (20191119):1", peak 1790, at 1249.56 , 2.303 sec , sec (Spec # 1169 49)

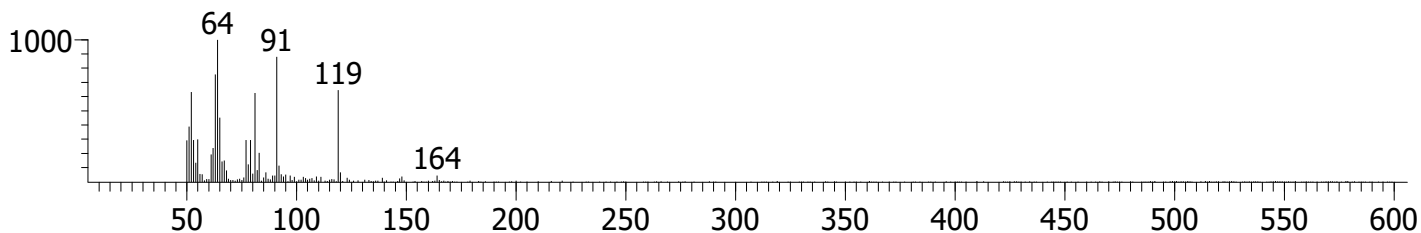

Peak True - sample "AerMBR B 091919 (20191119):1", peak 1790, at 1249.56 , 2.303 sec , sec (Spec # 1169 49)

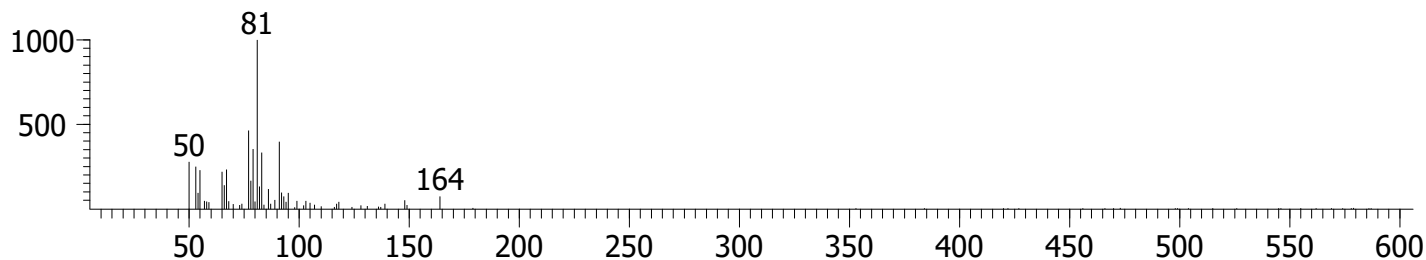

Library Hit - similarity 732, "2,7:3,6-Dimethano-2H-1-benzopyran, octahydro-"

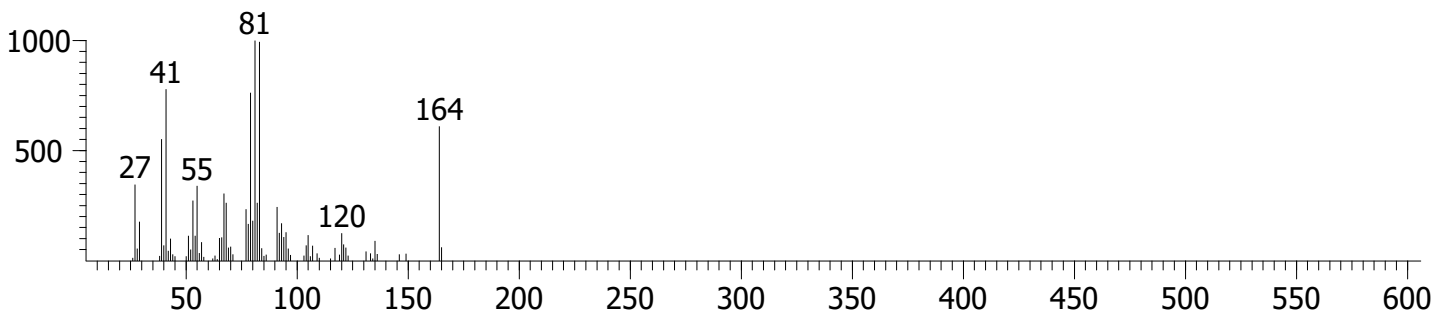

| Hit | Name                                          | Similarity | Probability | CAS        | Library | Formula  | Weight |
|-----|-----------------------------------------------|------------|-------------|------------|---------|----------|--------|
| 1   | 2,7:3,6-Dimethano-2H-1-benzopyran, octahydro- | 732        | 1997        | 55092-18-7 | mainlib | C11H16O  | 164    |
| 2   | Dicyclopentadiene diepoxide                   | 727        | 1609        | 81-21-0    | mainlib | C10H12O2 | 164    |
| 3   | 2,4-Decadienal, (E,E)-                        | 705        | 636         | 25152-84-5 | mainlib | C10H16O  | 152    |
| 4   | 4-Vinylcyclohexene diepoxide (isomer 2)       | 692        | 411         | 0-00-0     | mainlib | C8H12O2  | 140    |
| 5   | 4-Vinylcyclohexene diepoxide (isomer 1)       | 692        | 411         | 0-00-0     | mainlib | C8H12O2  | 140    |

2H-Benzocyclohepten-2-one,  
decahydro-4a-methyl-, trans-

1st Dimension R.T. = 1263.55  
2nd Dimension R.T. = 2.165  
Quant Mass(es) = 180  
S/N = 58.287  
Area = 4366.9  
Height = 453.01  
Similarity = 746

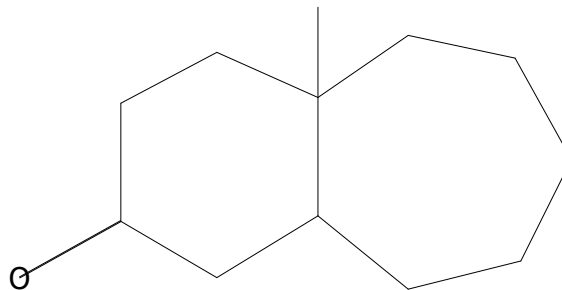

Peak Apex - sample "AerMBR B 091919 (20191119):1", peak 1836, at 1263.55 , 2.165 sec , sec (Spec # 1190 48)

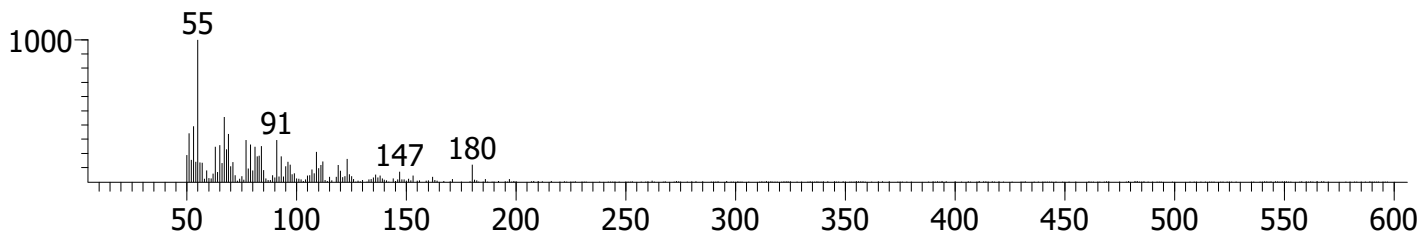

Peak True - sample "AerMBR B 091919 (20191119):1", peak 1836, at 1263.55 , 2.165 sec , sec (Spec # 1190 48)

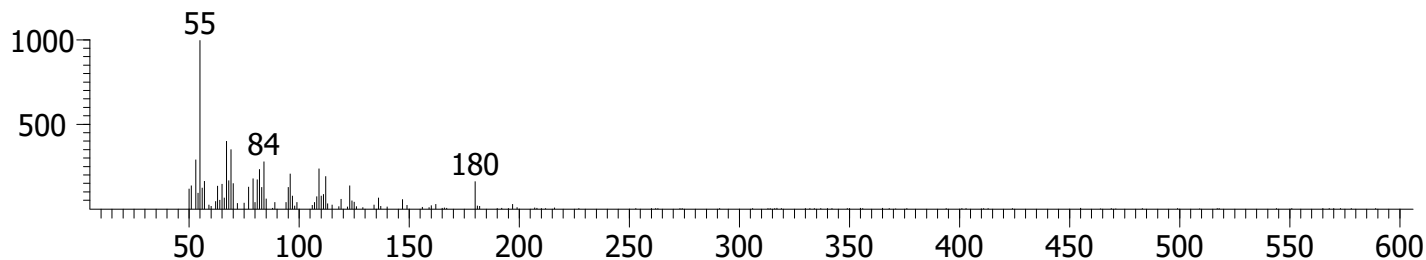

Library Hit - similarity 746, "2H-Benzocyclohepten-2-one, decahydro-4a-methyl-, trans-"

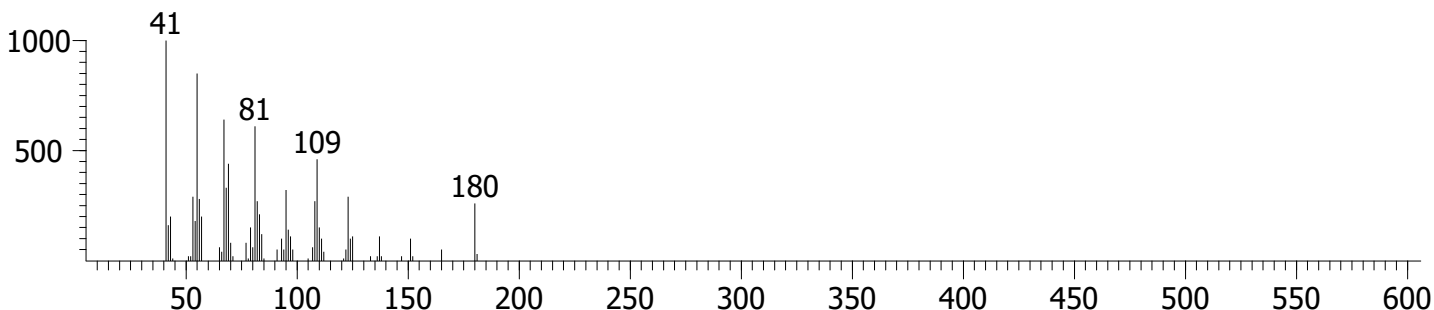

| Hit | Name                                                         | Similarity | Probability | CAS        | Library | Formula                             | Weight |
|-----|--------------------------------------------------------------|------------|-------------|------------|---------|-------------------------------------|--------|
| 1   | 2H-Benzocyclohepten-2-one, decahydro-4a-methyl-, trans-      | 746        | 1263        | 55103-64-5 | mainlib | C <sub>12</sub> H <sub>20</sub> O   | 180    |
| 2   | 2(1H)-Naphthalenone, octahydro-1,4a-dimethyl-, (1à,4aà,8aà)- | 744        | 1165        | 22738-31-4 | mainlib | C <sub>12</sub> H <sub>20</sub> O   | 180    |
| 3   | 2-Methyl-Z,Z-3,13-octadecadienol                             | 718        | 349         | 0-00-0     | mainlib | C <sub>19</sub> H <sub>36</sub> O   | 280    |
| 4   | 4-Chloro-3-n-hexyltetrahydropyran                            | 714        | 295         | 66555-66-6 | mainlib | C <sub>11</sub> H <sub>21</sub> ClO | 204    |
| 5   | E-7-Tetradecenol                                             | 711        | 260         | 37011-95-3 | mainlib | C <sub>14</sub> H <sub>28</sub> O   | 212    |

# 7-Dimethyl-5,6,7,7a-tetrahydrocyclopenta[c]

1st Dimension R.T. = 1291.54

2nd Dimension R.T. = 1.650

Quant Mass(es) = 166

S/N = 352.71

Area = 42024

Height = 5359.0

Similarity = 681

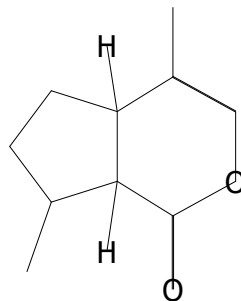

Peak Apex - sample "AerBxr C (20191121):1", peak 2197, at 1291.54 , 1.650 sec , sec (Spec # 123210)

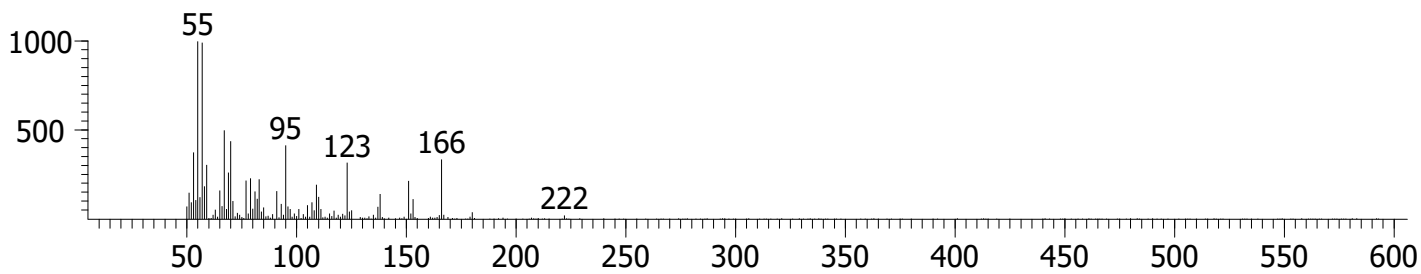

Peak True - sample "AerBxr C (20191121):1", peak 2197, at 1291.54 , 1.650 sec , sec (Spec # 123210)

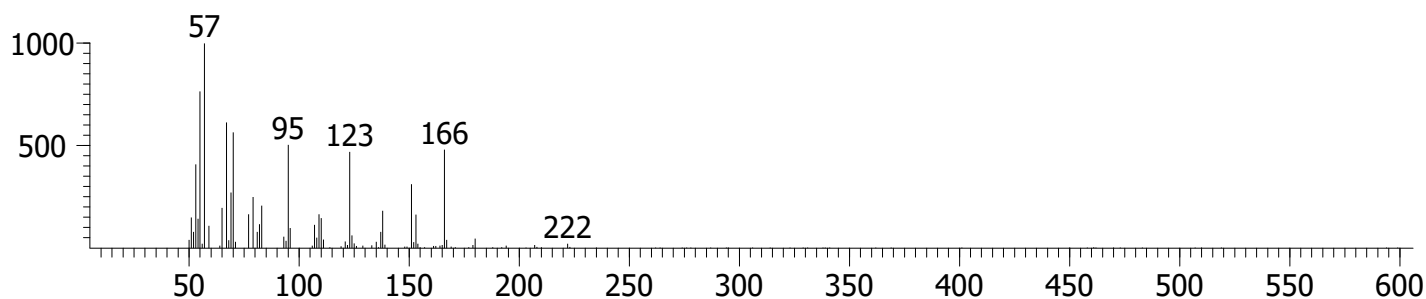

Library Hit - similarity 681, "(4aR,7S,7aS)-4,7-Dimethyl-5,6,7,7a-tetrahydrocyclopenta[c]pyran-1(4aH)-one"

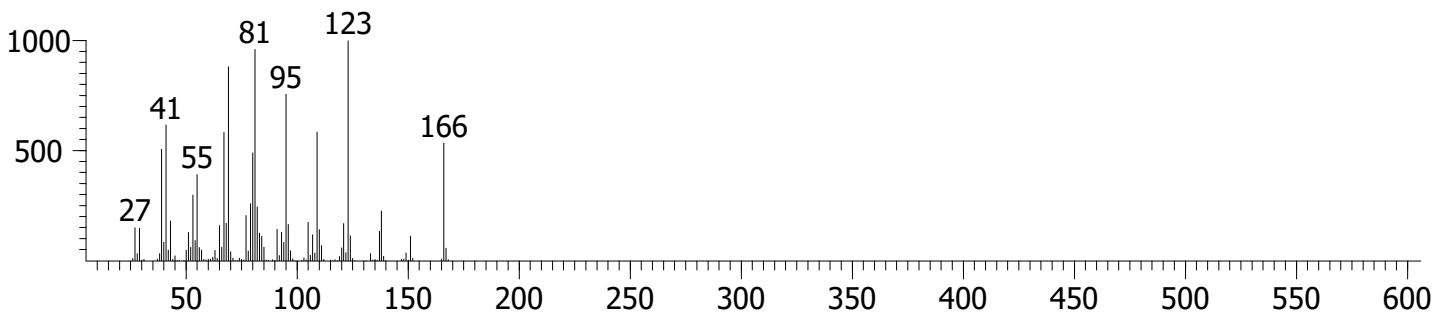

| Hit | Name                                                                       | Similarity | Probability | CAS        | Library | Formula  | Weight |
|-----|----------------------------------------------------------------------------|------------|-------------|------------|---------|----------|--------|
| 1   | (4aR,7S,7aS)-4,7-Dimethyl-5,6,7,7a-tetrahydrocyclopenta[c]pyran-1(4aH)-one | 681        | 1135        | 21651-53-6 | mainlib | C10H14O2 | 166    |
| 2   | Cyclodecene, 1,2-dimethyl-, (Z)-                                           | 672        | 824         | 14113-67-8 | mainlib | C12H22   | 166    |
| 3   | Cyclohexanone, 2,5-dimethyl-2-(1-methylethenyl)-                           | 667        | 664         | 6711-26-8  | mainlib | C11H18O  | 166    |
| 4   | 3,5-Decadiene, 2,2-dimethyl-, (Z,Z)-                                       | 658        | 482         | 55638-50-1 | mainlib | C12H22   | 166    |
| 5   | 2(5H)-Furanone, 4-(2,3-dimethyl-2-buten-4-yl)-                             | 657        | 463         | 0-00-0     | mainlib | C10H14O2 | 166    |

2-Cyclopenten-1-one,  
4-hydroxy-2-methyl-3-phenyl-

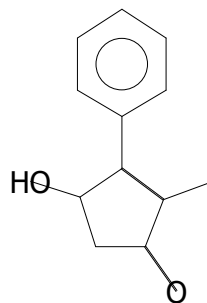

1st Dimension R.T. = 1298.53  
2nd Dimension R.T. = 1.973  
Quant Mass(es) = 145  
S/N = 78.260  
Area = 61620  
Height = 5551.7  
Similarity = 676

Peak Apex - sample "AerMBR A 092319 (20191119):1", peak 1732, at 1298.53 , 1.973 sec , sec (Spec # 1243 19)

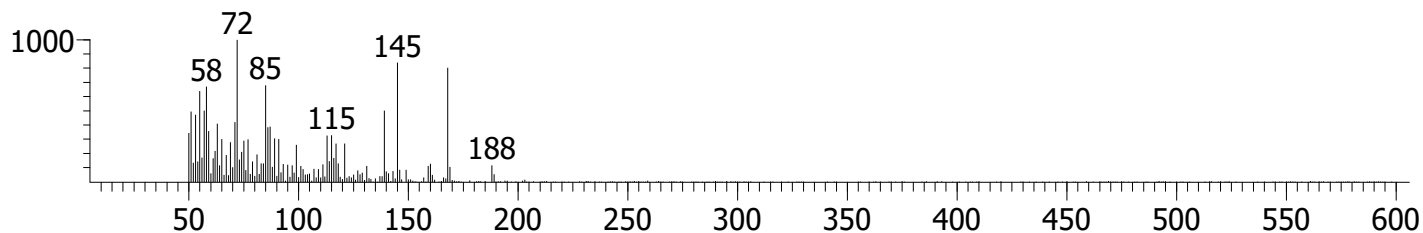

Peak True - sample "AerMBR A 092319 (20191119):1", peak 1732, at 1298.53 , 1.973 sec , sec (Spec # 1243 19)

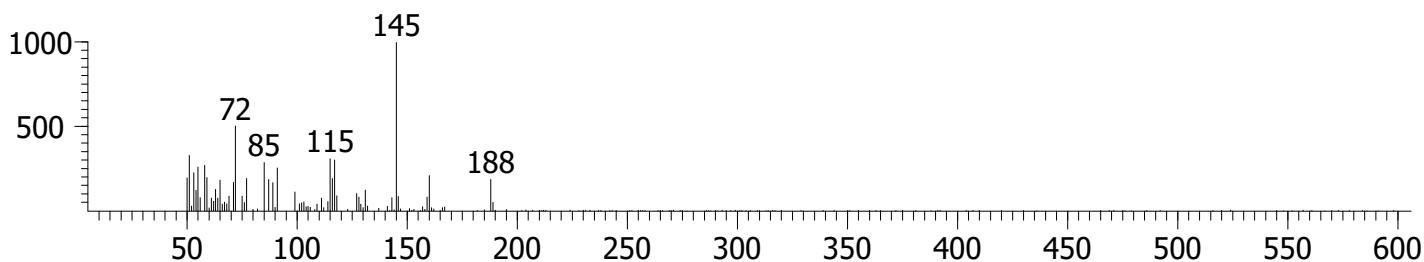

Library Hit - similarity 676, "2-Cyclopenten-1-one, 4-hydroxy-2-methyl-3-phenyl-"

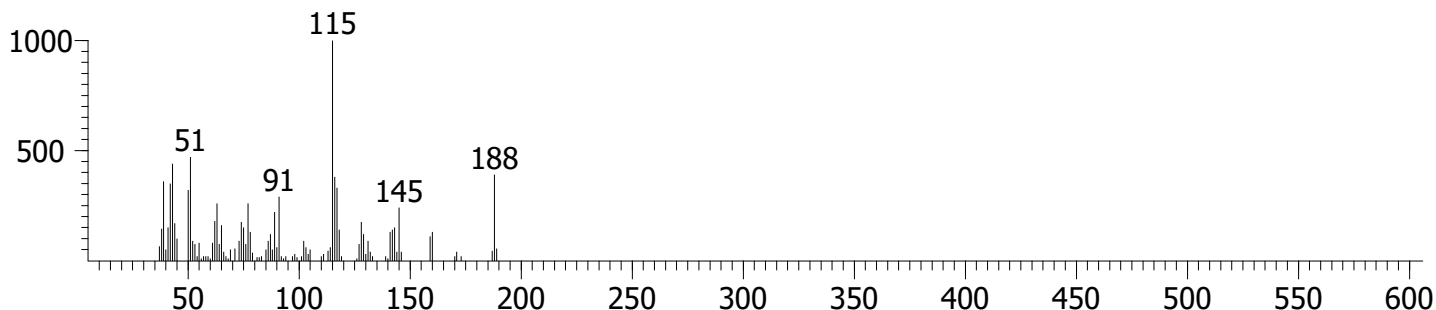

| Hit | Name                                              | Similarity | Probability | CAS        | Library | Formula  | Weight |
|-----|---------------------------------------------------|------------|-------------|------------|---------|----------|--------|
| 1   | 2-Cyclopenten-1-one, 4-hydroxy-2-methyl-3-phenyl- | 676        | 1582        | 69745-73-9 | mainlib | C12H12O2 | 188    |
| 2   | Naphthalene, 1,2,3,4-tetrahydro-1,1-dimethyl-     | 668        | 1180        | 1985-59-7  | mainlib | C12H16   | 160    |
| 3   | Benzene, 1-(1-methylethenyl)-3-(1-methylethyl)-   | 653        | 715         | 1129-29-9  | mainlib | C12H16   | 160    |
| 4   | 1H-Inden-1-one, 2,3-dihydro-3,3-dimethyl-         | 652        | 687         | 26465-81-6 | mainlib | C11H12O  | 160    |
| 5   | Coumarin, 5,7,8-trimethyl-                        | 637        | 416         | 40662-19-9 | mainlib | C12H12O2 | 188    |

## 5,6,7,8-Tetrahydroindolizine

1st Dimension R.T. = 1319.52  
2nd Dimension R.T. = 1.617  
Quant Mass(es) = 120  
S/N = 181.95  
Area = 15435  
Height = 1905.7  
Similarity = 731

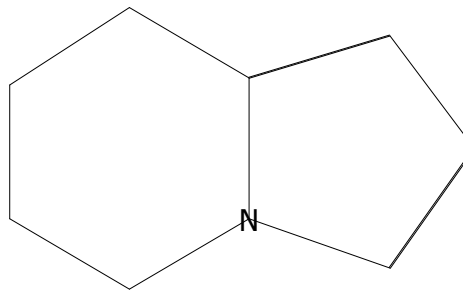

Peak Apex - sample "AerMBR C 091919 (20191119):1", peak 2092, at 1319.52 , 1.617 sec , sec (Spec # 1274 45)

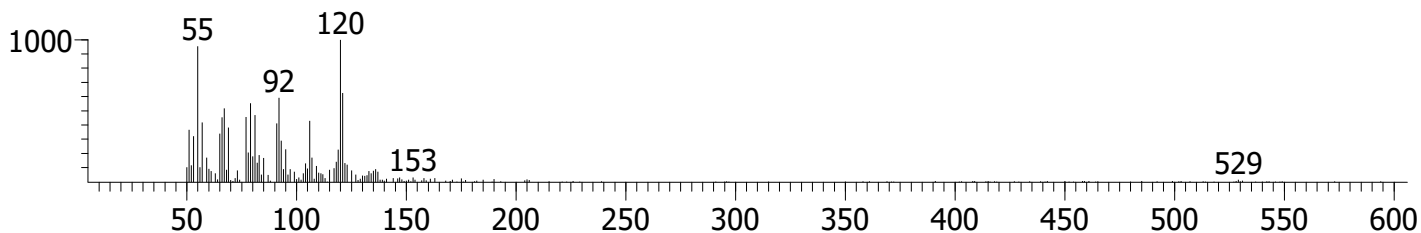

Peak True - sample "AerMBR C 091919 (20191119):1", peak 2092, at 1319.52 , 1.617 sec , sec (Spec # 1274 45)

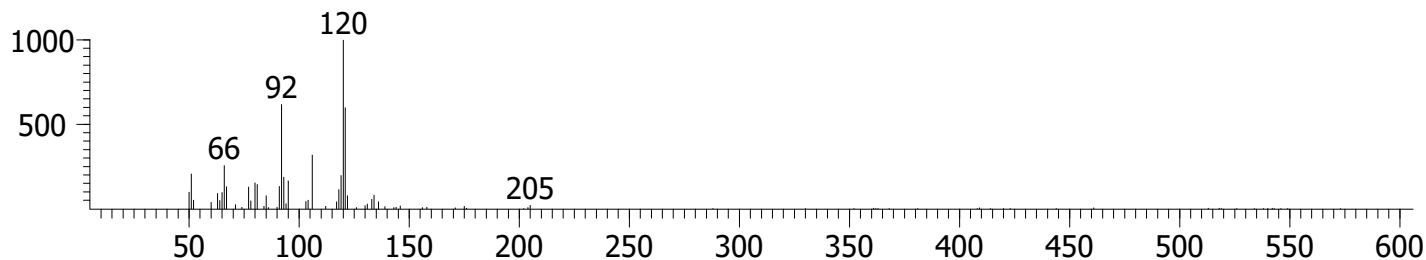

Library Hit - similarity 731, "5,6,7,8-Tetrahydroindolizine"

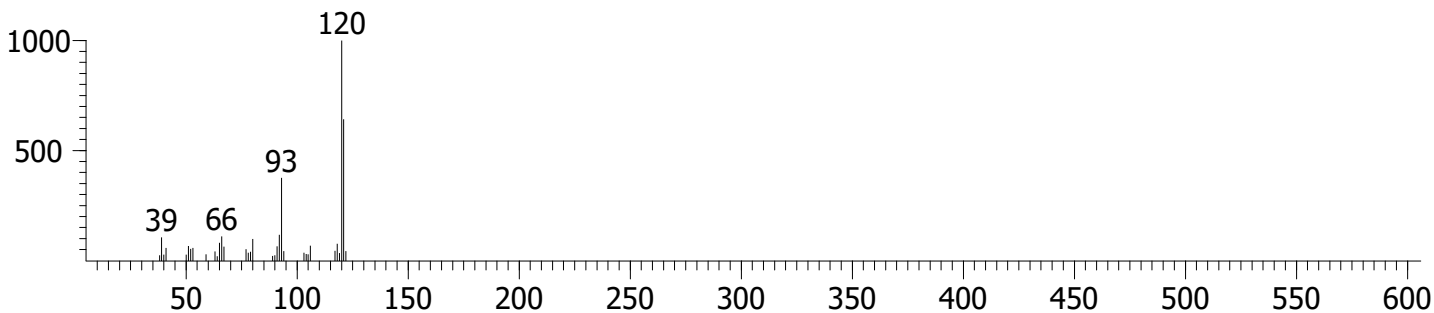

| Hit | Name                                                  | Similarity | Probability | CAS         | Library | Formula    | Weight |
|-----|-------------------------------------------------------|------------|-------------|-------------|---------|------------|--------|
| 1   | 5,6,7,8-Tetrahydroindolizine                          | 731        | 3138        | 13618-88-7  | mainlib | C8H11N     | 121    |
| 2   | 2,2'-Bis[5,6,7,8-tetrahydroindolizine]                | 724        | 2404        | 0-00-0      | mainlib | C16H20N2   | 240    |
| 3   | Pyridine, 2-ethyl-6-methyl-                           | 682        | 539         | 1122-69-6   | mainlib | C8H11N     | 121    |
| 4   | 2-Amino-4-methylpyrrole-3-carbonitrile                | 669        | 348         | 59146-60-0  | mainlib | C6H7N3     | 121    |
| 5   | 3-(Anthraniloylhydrazono)-N-(2-ethylphenyl)butyramide | 666        | 307         | 350039-69-9 | mainlib | C19H22N4O2 | 338    |

## 2,1-Benzisoxazole, 7-ethyl-3-methyl-

1st Dimension R.T. = 1413.97  
2nd Dimension R.T. = 2.356  
Quant Mass(es) = 146  
S/N = 158.55  
Area = 12957  
Height = 1383.1  
Similarity = 714

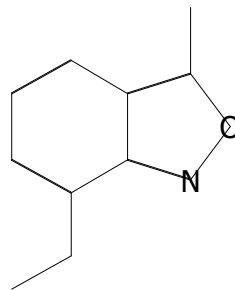

Peak Apex - sample "AerMBR B 091919 (20191119):1", peak 2261, at 1413.97 , 2.356 sec , sec (Spec # 1418 67)

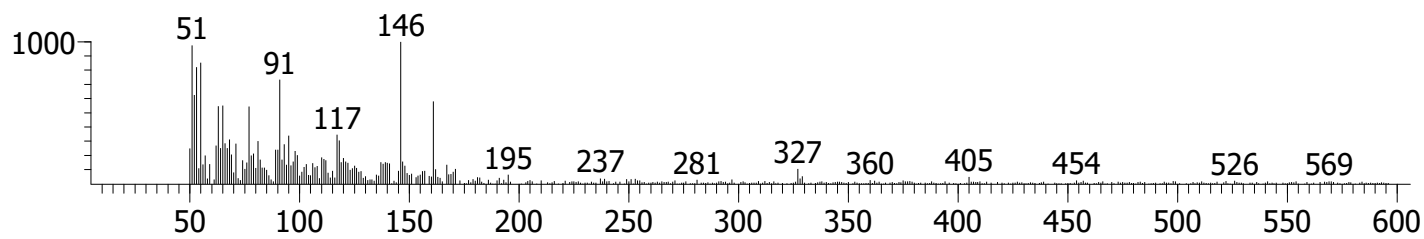

Peak True - sample "AerMBR B 091919 (20191119):1", peak 2261, at 1413.97 , 2.356 sec , sec (Spec # 1418 67)

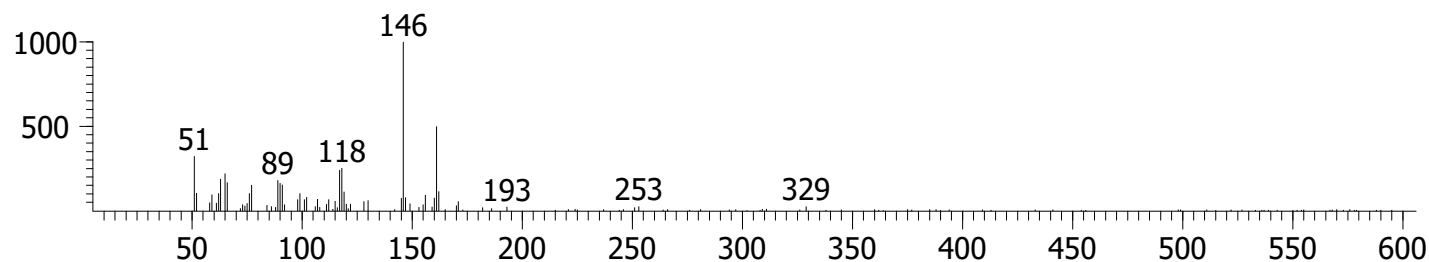

Library Hit - similarity 714, "2,1-Benzisoxazole, 7-ethyl-3-methyl-"

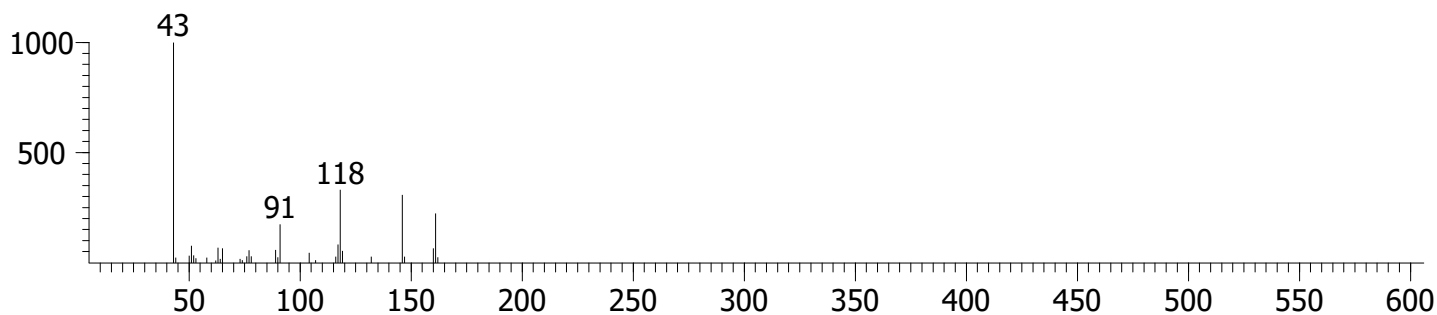

| Hit | Name                                      | Similarity | Probability | CAS         | Library | Formula  | Weight |
|-----|-------------------------------------------|------------|-------------|-------------|---------|----------|--------|
| 1   | 2,1-Benzisoxazole, 7-ethyl-3-methyl-      | 714        | 1494        | 108562-69-2 | mainlib | C10H11NO | 161    |
| 2   | 1H-isoindol-1-one, 2-ethyl-2,3-dihydro-   | 708        | 1174        | 0-00-0      | mainlib | C10H11NO | 161    |
| 3   | 1H-Indole, 5-methoxy-2-methyl-            | 708        | 1174        | 1076-74-0   | mainlib | C10H11NO | 161    |
| 4   | quinoline, 1-ethyl-1,2,3,4-tetrahydro-    | 706        | 1083        | 0-00-0      | mainlib | C11H15N  | 161    |
| 5   | 2H-Indol-2-one, 1,3-dihydro-3,3-dimethyl- | 706        | 1083        | 19155-24-9  | mainlib | C10H11NO | 161    |



# Benzene, 1-azido-3-methoxy-

1st Dimension R.T. = 1469.93  
2nd Dimension R.T. = 2.495  
Quant Mass(es) = 106  
S/N = 970.70  
Area = 523414  
Height = 48607  
Similarity = 794

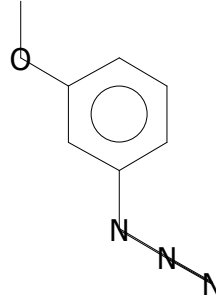

Peak Apex - sample "AerMBR B 091919 (20191119):1", peak 2421, at 1469.93 , 2.495 sec , sec (Spec # 1503 68)

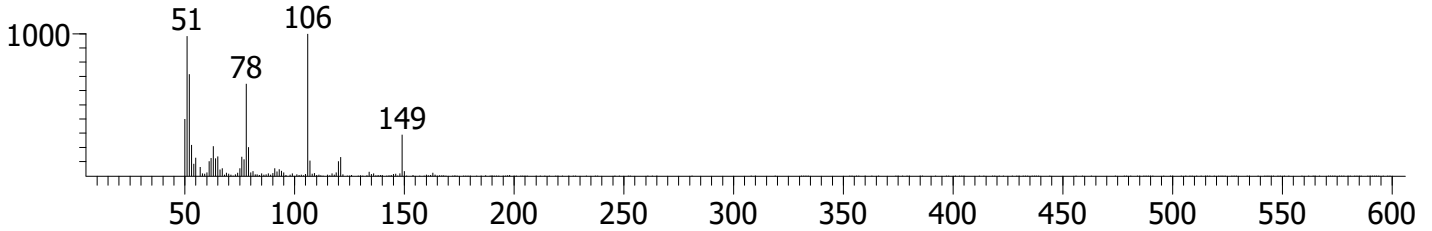

Peak True - sample "AerMBR B 091919 (20191119):1", peak 2421, at 1469.93 , 2.495 sec , sec (Spec # 1503 68)

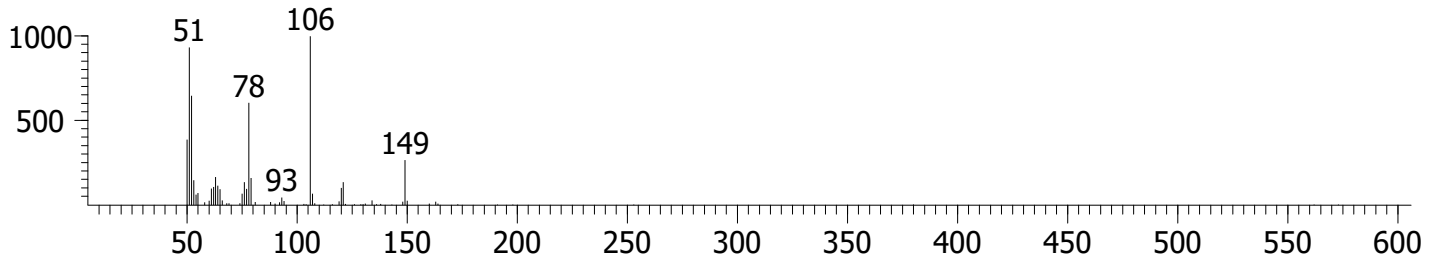

Library Hit - similarity 794, "Benzene, 1-azido-3-methoxy-"

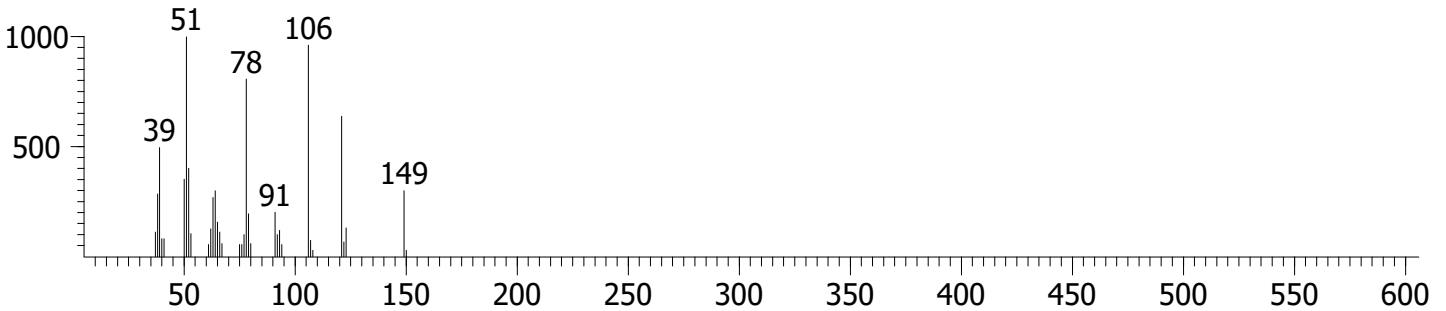

| Hit | Name                                                     | Similarity | Probability | CAS        | Library | Formula    | Weight |
|-----|----------------------------------------------------------|------------|-------------|------------|---------|------------|--------|
| 1   | Benzene, 1-azido-3-methoxy-                              | 794        | 4479        | 3866-16-8  | mainlib | C7H7N3O    | 149    |
| 2   | 3,5-Dimethyl-5-[2-pyridyl]-1,3,4-thiadiazolidin-2-thione | 762        | 1196        | 74752-62-8 | mainlib | C9H11N3S2  | 225    |
| 3   | N-(3-Methoxy-5-tetrazol-1-yl-phenyl)-isonicotinamide     | 754        | 892         | 0-00-0     | mainlib | C14H12N6O2 | 296    |
| 4   | 1H-Benzotriazole, 4-methoxy-                             | 741        | 576         | 27799-90-2 | mainlib | C7H7N3O    | 149    |
| 5   | 1-Butanone, 1-(3-pyridinyl)-                             | 738        | 509         | 1701-70-8  | mainlib | C9H11NO    | 149    |

# Naphthalene, 1,3,7-trichloro-

1st Dimension R.T. = 1476.93  
2nd Dimension R.T. = 2.198  
Quant Mass(es) = 232  
S/N = 709.67  
Area = 71839  
Height = 7646.4  
Similarity = 668

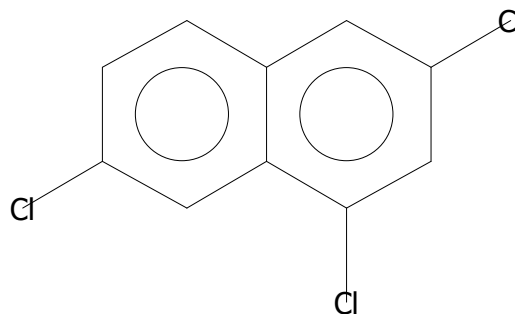

Peak Apex - sample "AerMBR B 091919 (20191119):1", peak 2442, at 1476.93 , 2.198 sec , sec (Spec # 1513 83)

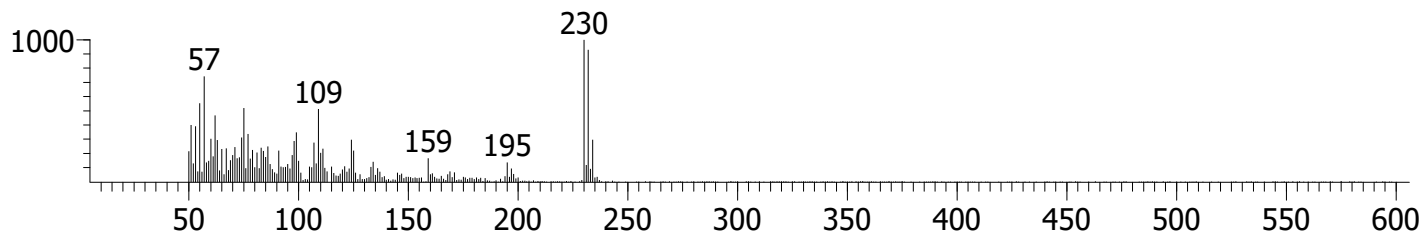

Peak True - sample "AerMBR B 091919 (20191119):1", peak 2442, at 1476.93 , 2.198 sec , sec (Spec # 1513 83)

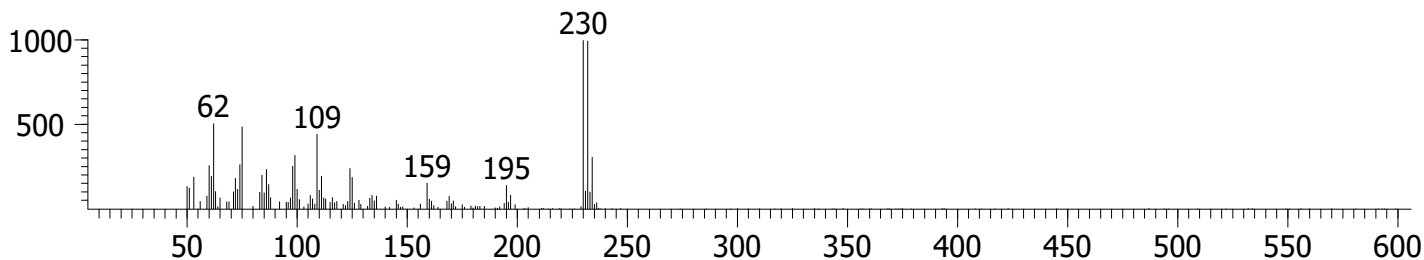

Library Hit - similarity 668, "Naphthalene, 1,3,7-trichloro-"

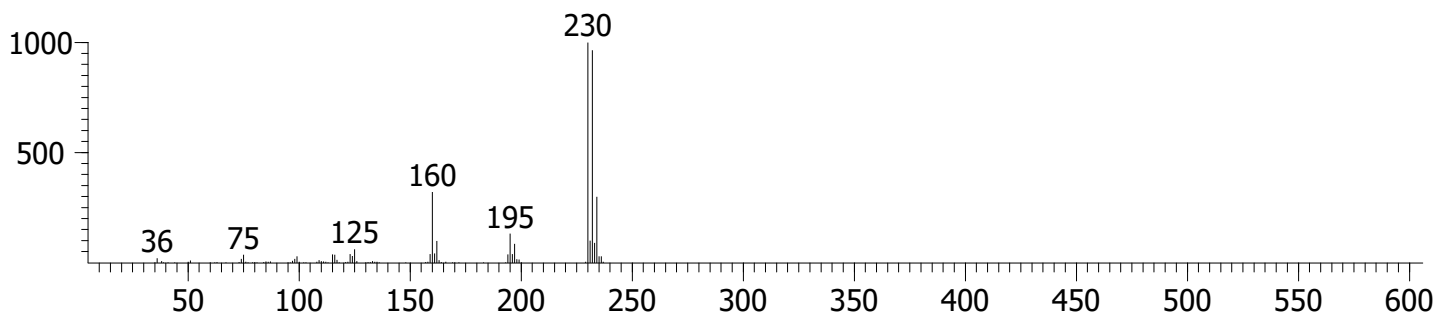

| Hit | Name                                                                        | Similarity | Probability | CAS        | Library | Formula   | Weight |
|-----|-----------------------------------------------------------------------------|------------|-------------|------------|---------|-----------|--------|
| 1   | 2,4,5,6-Tetrachloro-pyridin-3-ylamine                                       | 684        | 3319        | 0-00-0     | mainlib | C5H2Cl4N2 | 230    |
| 2   | Naphthalene, 1,3,7-trichloro-                                               | 668        | 1911        | 55720-37-1 | mainlib | C10H5Cl3  | 230    |
| 3   | Naphthalene, 2,3,6-trichloro-                                               | 665        | 1689        | 55720-40-6 | mainlib | C10H5Cl3  | 230    |
| 4   | 1,3,5-Metheno-1H-cyclopropa[a]pentalene, 1,1a,4,5,5a,6-hexachlorooctahydro- | 611        | 330         | 69743-71-1 | mainlib | C10H6Cl6  | 336    |
| 5   | 1-Perchloroethenyl-4-ethynylbenzene                                         | 601        | 233         | 0-00-0     | mainlib | C10H5Cl3  | 230    |

# Naphthalene, 2,3-dimethoxy-

1st Dimension R.T. = 1511.91  
2nd Dimension R.T. = 2.224  
Quant Mass(es) = 188  
S/N = 148.12  
Area = 16001  
Height = 1655.3  
Similarity = 734

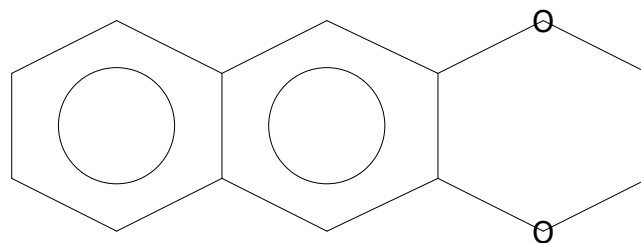

Peak Apex - sample "AerMBR B 091919 (20191119):1", peak 2545, at 1511.91 , 2.224 sec , sec (Spec # 1566 87)

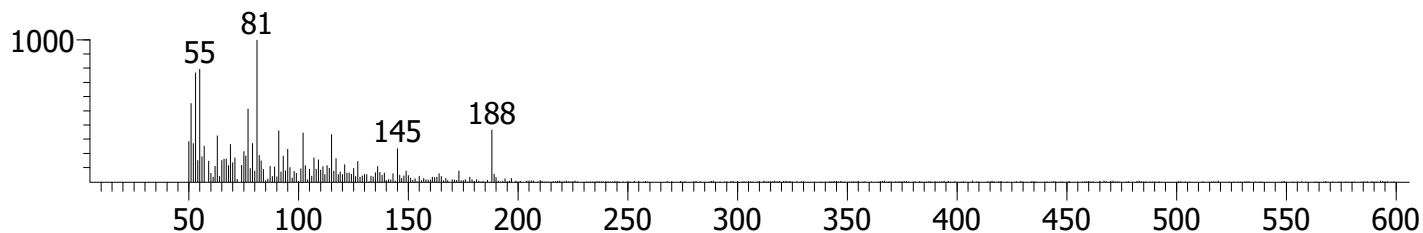

Peak True - sample "AerMBR B 091919 (20191119):1", peak 2545, at 1511.91 , 2.224 sec , sec (Spec # 1566 87)

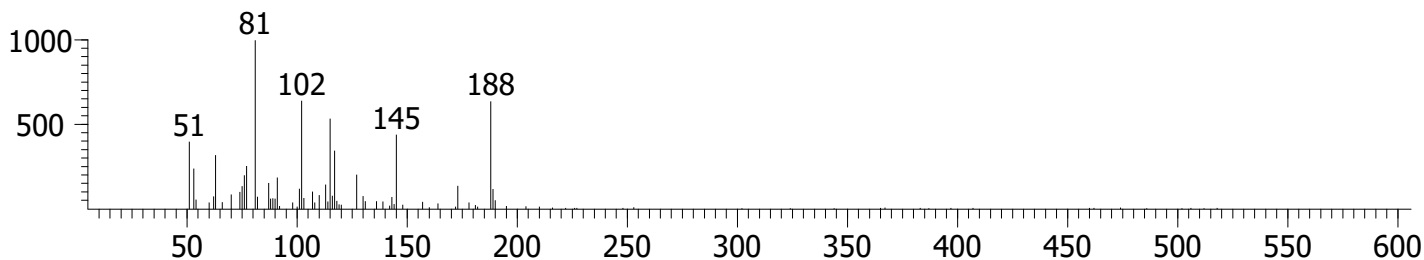

Library Hit - similarity 734, "Naphthalene, 2,3-dimethoxy-"

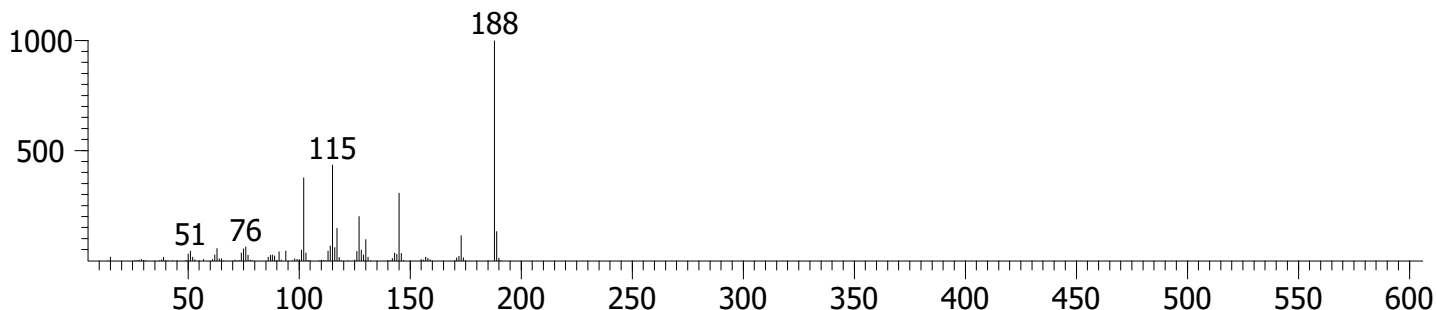

| Hit | Name                                              | Similarity | Probability | CAS        | Library | Formula  | Weight |
|-----|---------------------------------------------------|------------|-------------|------------|---------|----------|--------|
| 1   | Naphthalene, 2,3-dimethoxy-                       | 734        | 7228        | 10103-06-7 | mainlib | C12H12O2 | 188    |
| 2   | naphthalene, 1,8-dimethoxy-                       | 663        | 1029        | 0-00-0     | mainlib | C12H12O2 | 188    |
| 3   | Naphthalene, 1,4-dimethoxy-                       | 663        | 1029        | 10075-62-4 | mainlib | C12H12O2 | 188    |
| 4   | 1,2-Dimethoxy-5H-benzo[a]cyclohepten-5-one        | 619        | 223         | 0-00-0     | mainlib | C13H12O3 | 216    |
| 5   | 2-Cyclopenten-1-one, 4-hydroxy-3-methyl-2-phenyl- | 592        | 65          | 69766-87-6 | mainlib | C12H12O2 | 188    |

## 3,4-Dimethoxybenzylideneacetone

1st Dimension R.T. = 1518.91  
2nd Dimension R.T. = 1.967  
Quant Mass(es) = 191  
S/N = 158.90  
Area = 15391  
Height = 1505.6  
Similarity = 677

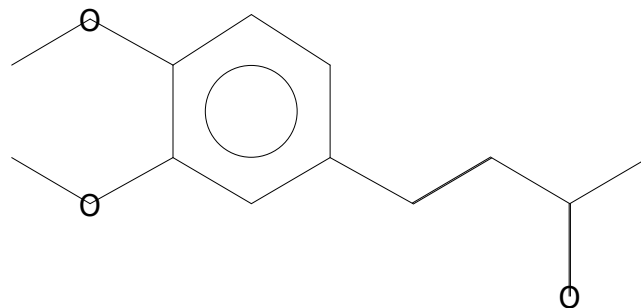

Peak Apex - sample "AerMBR C 091919 (20191119):1", peak 2634, at 1518.91 , 1.967 sec , sec (Spec # 1577 08)

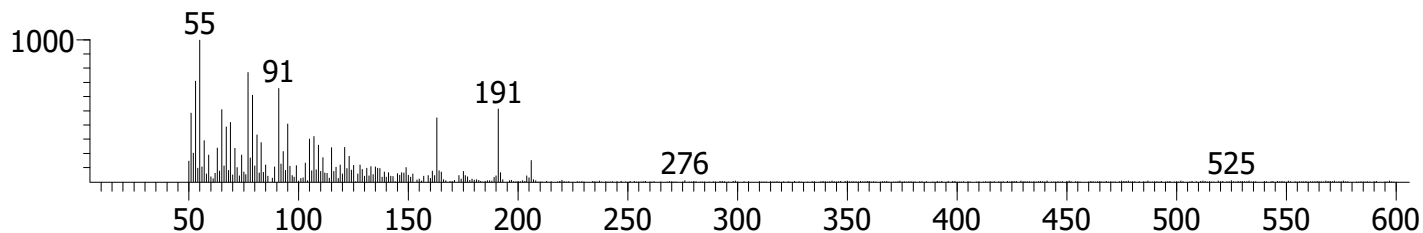

Peak True - sample "AerMBR C 091919 (20191119):1", peak 2634, at 1518.91 , 1.967 sec , sec (Spec # 1577 08)

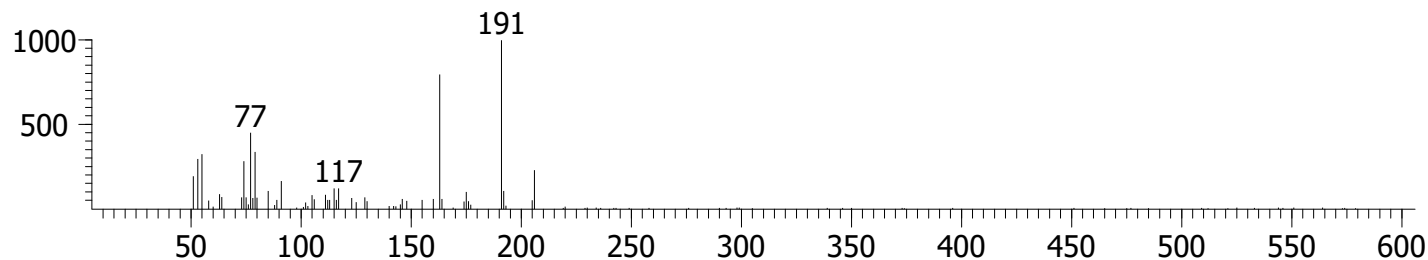

Library Hit - similarity 677, "3,4-Dimethoxybenzylideneacetone"

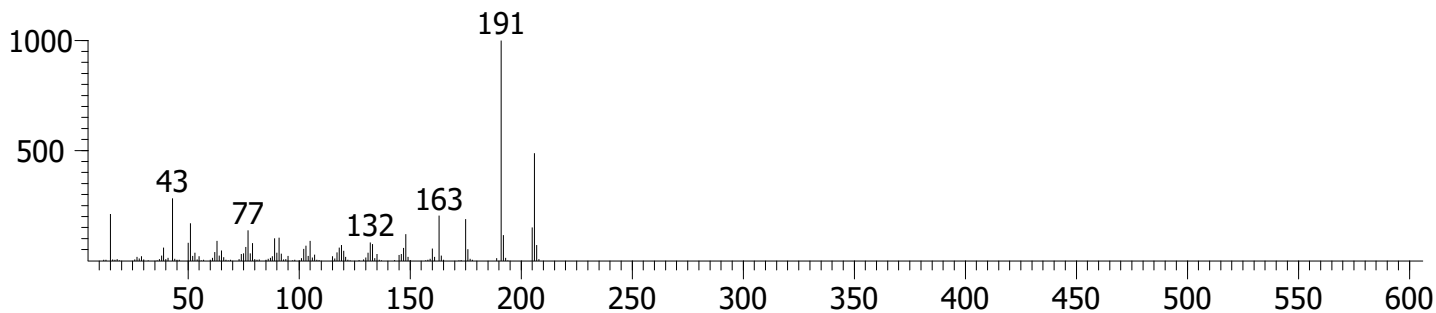

| Hit | Name                                                | Similarity | Probability | CAS        | Library | Formula                                        | Weight |
|-----|-----------------------------------------------------|------------|-------------|------------|---------|------------------------------------------------|--------|
| 1   | 3,4-Dimethoxybenzylideneacetone                     | 677        | 2251        | 15001-27-1 | mainlib | C <sub>12</sub> H <sub>14</sub> O <sub>3</sub> | 206    |
| 2   | Phenol, 2,5-bis(1,1-dimethylethyl)-                 | 655        | 889         | 5875-45-6  | mainlib | C <sub>14</sub> H <sub>22</sub> O              | 206    |
| 3   | 1H-Inden-1-one, 2,3-dihydro-5,6-dimethoxy-3-methyl- | 654        | 855         | 4082-25-1  | mainlib | C <sub>12</sub> H <sub>14</sub> O <sub>3</sub> | 206    |
| 4   | Phenol, 2,6-bis(1,1-dimethylethyl)-                 | 647        | 655         | 128-39-2   | mainlib | C <sub>14</sub> H <sub>22</sub> O              | 206    |
| 5   | 2,4-Di-tert-butylphenol                             | 645        | 604         | 96-76-4    | mainlib | C <sub>14</sub> H <sub>22</sub> O              | 206    |

# Sydnone, 3-(2-methylphenyl)-

1st Dimension R.T. = 1529.4  
2nd Dimension R.T. = 2.409  
Quant Mass(es) = 118  
S/N = 89.468  
Area = 9917.5  
Height = 919.05  
Similarity = 696

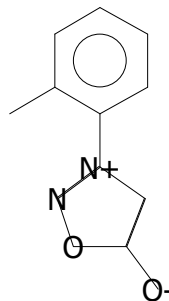

Peak Apex - sample "AerMBR B 091919 (20191119):1", peak 2603, at 1529.4 , 2.409 sec , sec (Spec # 15936 5)

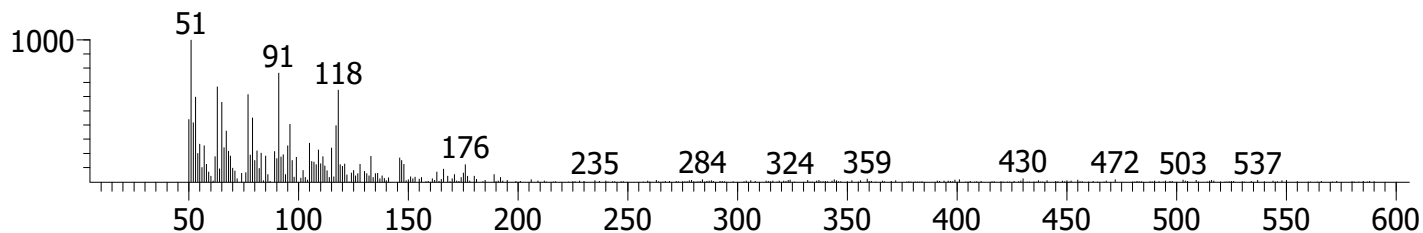

Peak True - sample "AerMBR B 091919 (20191119):1", peak 2603, at 1529.4 , 2.409 sec , sec (Spec # 15936 5)

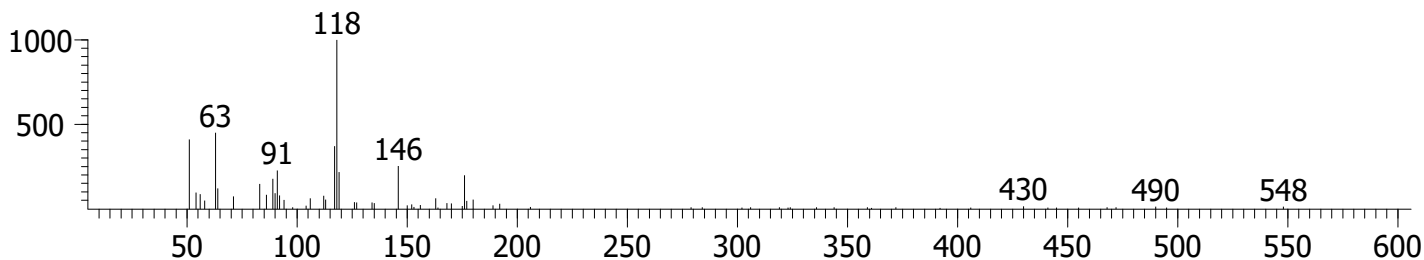

Library Hit - similarity 696, "Sydnone, 3-(2-methylphenyl)-"

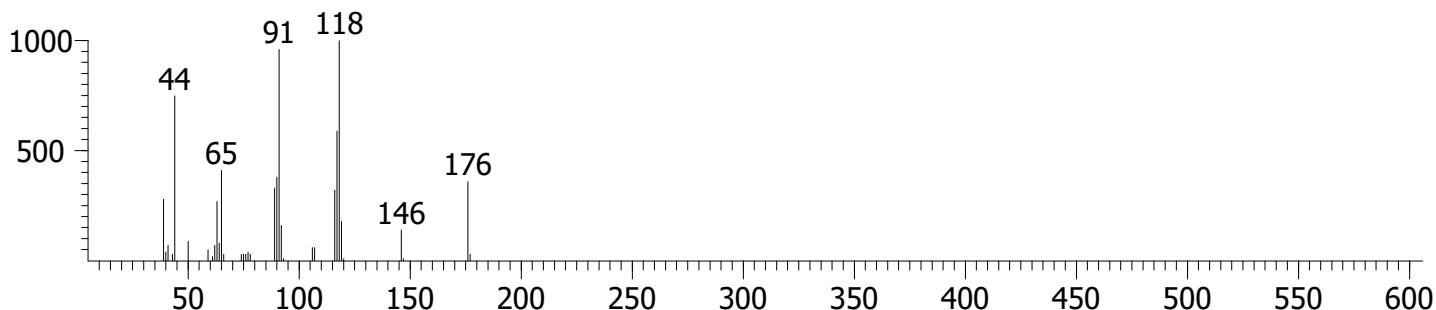

| Hit | Name                                                    | Similarity | Probability | CAS        | Library | Formula   | Weight |
|-----|---------------------------------------------------------|------------|-------------|------------|---------|-----------|--------|
| 1   | Sydnone, 3-(2-methylphenyl)-                            | 696        | 2677        | 3483-18-9  | mainlib | C9H8N2O2  | 176    |
| 2   | 4-Butylbenzoic acid, 3-phenylpropyl ester               | 629        | 414         | 0-00-0     | mainlib | C20H24O2  | 296    |
| 3   | Quinazoline-4-carboxylic acid, 1,2-dihydro-2-oxo-       | 627        | 382         | 99066-77-0 | mainlib | C9H6N2O3  | 190    |
| 4   | 2-Propenoic acid, 3-(di-2-propynylamino)-, methyl ester | 622        | 308         | 50838-16-9 | mainlib | C10H11NO2 | 177    |
| 5   | 2-[5-(4-Aminophenyl)-1,2,3,4-tetrazol-2-yl]ethanol      | 621        | 296         | 0-00-0     | mainlib | C9H11N5O  | 205    |

## 3-Bis(1,1-dimethylethyl)-4-(1-oxopropyl)pher

1st Dimension R.T. = 1774.26

2nd Dimension R.T. = 1.815

Quant Mass(es) = 233

S/N = 946.26

Area = 97976

Height = 10407

Similarity = 730

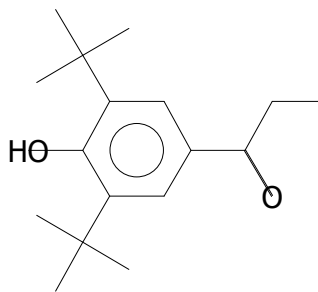

Peak Apex - sample "AerMBR B 091919 (20191119):1", peak 3368, at 1774.26 , 1.815 sec , sec (Spec # 1963 75)

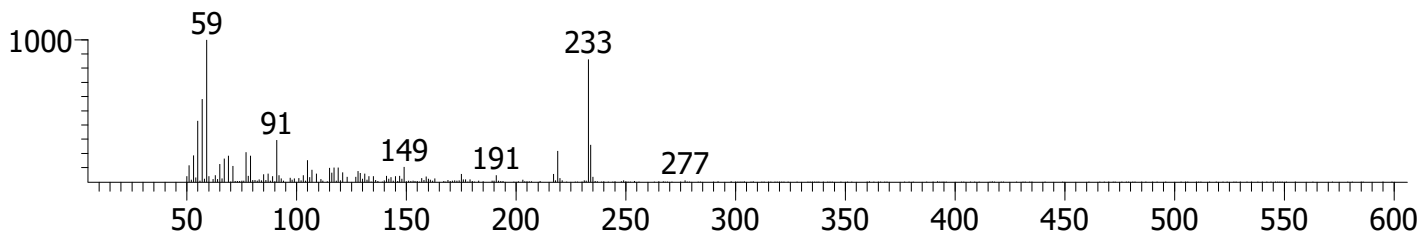

Peak True - sample "AerMBR B 091919 (20191119):1", peak 3368, at 1774.26 , 1.815 sec , sec (Spec # 1963 75)

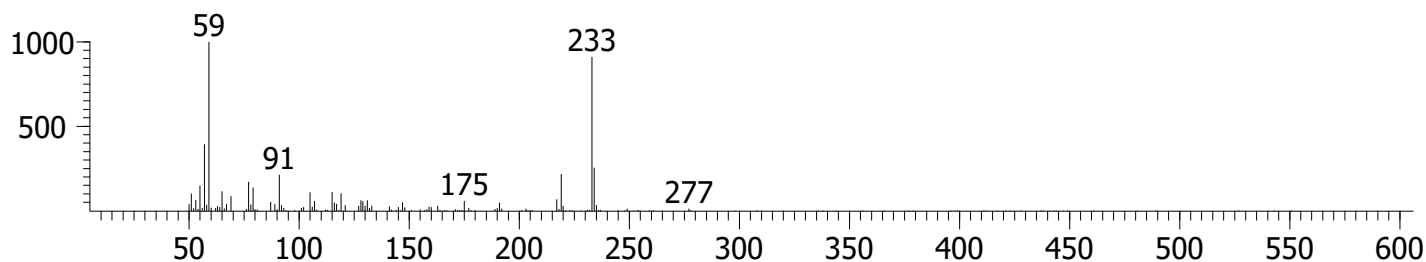

Library Hit - similarity 730, "2,6-Bis(1,1-dimethylethyl)-4-(1-oxopropyl)phenol"

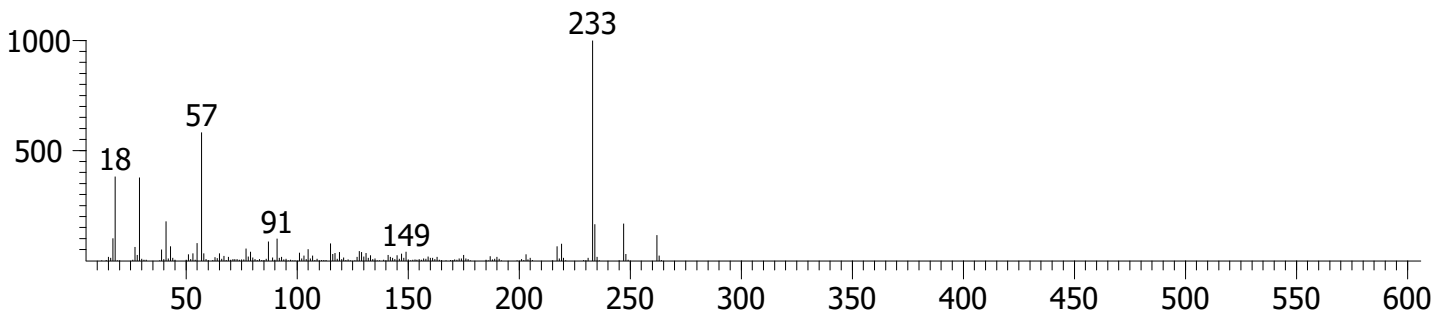

| Hit | Name                                                                            | Similarity | Probability | CAS        | Library | Formula    | Weight |
|-----|---------------------------------------------------------------------------------|------------|-------------|------------|---------|------------|--------|
| 1   | 2,6-Bis(1,1-dimethylethyl)-4-(1-oxopropyl)phenol                                | 730        | 7944        | 14035-34-8 | mainlib | C17H26O2   | 262    |
| 2   | 1-(3,5-Di-tert-butyl-4-hydroxyphenyl)-2-bromethanone                            | 640        | 679         | 14386-64-2 | mainlib | C16H23BrO2 | 326    |
| 3   | 2,4-Pentanedione, 1-(7-acetyl-4,6-dihydroxy-3,5-dimethyl-2-benzofuranyl)-       | 624        | 391         | 21402-79-9 | mainlib | C17H18O6   | 318    |
| 4   | 2H-1-benzopyran-6-ol, 3,4-dihydro-2,2,4-trimethyl-7-(1,1,3,3-tetramethylbutyl)- | 613        | 268         | 0-00-0     | mainlib | C20H32O2   | 304    |
| 5   | Succinic acid, di(2-tert-butylphenyl) ester                                     | 604        | 194         | 0-00-0     | mainlib | C24H30O4   | 382    |

## 4-(4-Chlorophenyl)-2-pyrrolidinone

1st Dimension R.T. = 1777.76

2nd Dimension R.T. = 2.739

Quant Mass(es) = 138

S/N = 248.32

Area = 41692

Height = 3688.4

Similarity = 760

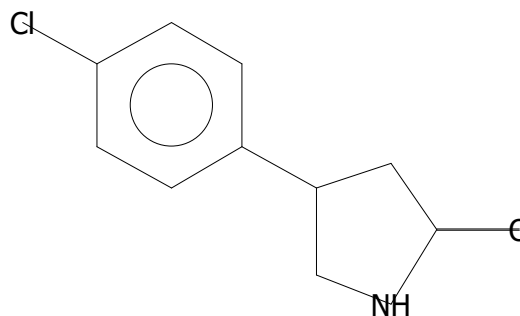

Peak Apex - sample "AerMBR B 091919 (20191119):1", peak 3389, at 1777.76 , 2.739 sec , sec (Spec # 1970 45)

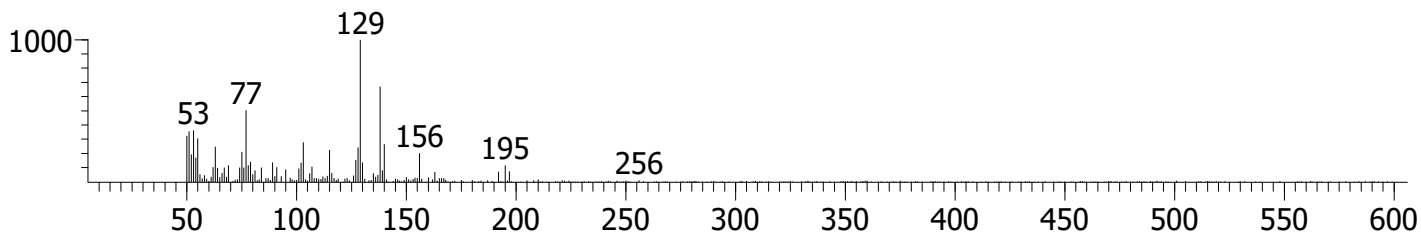

Peak True - sample "AerMBR B 091919 (20191119):1", peak 3389, at 1777.76 , 2.739 sec , sec (Spec # 1970 45)

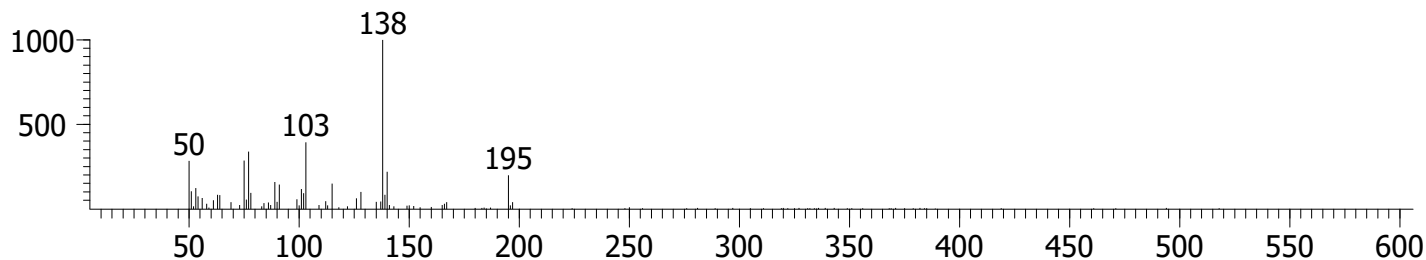

Library Hit - similarity 760, "4-(4-Chlorophenyl)-2-pyrrolidinone"

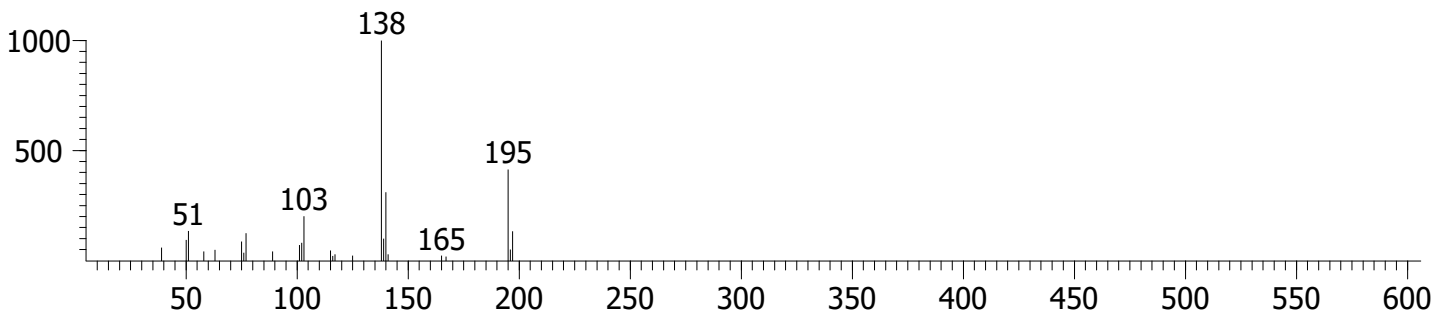

| Hit | Name                                              | Similarity | Probability | CAS        | Library | Formula     | Weight |
|-----|---------------------------------------------------|------------|-------------|------------|---------|-------------|--------|
| 1   | 4-(4-Chlorophenyl)-2-pyrrolidinone                | 760        | 5500        | 22518-27-0 | mainlib | C10H10ClNO  | 195    |
| 2   | Baclofen                                          | 733        | 1618        | 1134-47-0  | mainlib | C10H12ClNO2 | 213    |
| 3   | 4-(4-Chlorophenyl)-5,5-dimethyldihydrofuran-2-one | 709        | 542         | 63507-00-6 | mainlib | C12H13ClO2  | 224    |
| 4   | Benzene, 1-chloro-4-ethenyl-                      | 692        | 295         | 1073-67-2  | mainlib | C8H7Cl      | 138    |
| 5   | Benzene, 1-chloro-4-(4-methyl-4-pentenyl)-        | 692        | 295         | 74672-11-0 | mainlib | C12H15Cl    | 194    |

# Benzene, 1-fluoro-4-(2-phenylethenyl)-, (E)-

1st Dimension R.T. = 1854.71  
2nd Dimension R.T. = 2.171  
Quant Mass(es) = 198  
S/N = 77.111  
Area = 9094.8  
Height = 881.62  
Similarity = 701

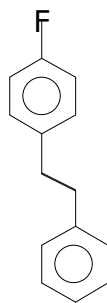

Peak Apex - sample "AerMBR C 091919 (20191119):1", peak 3423, at 1854.71 , 2.171 sec , sec (Spec # 2086 19)

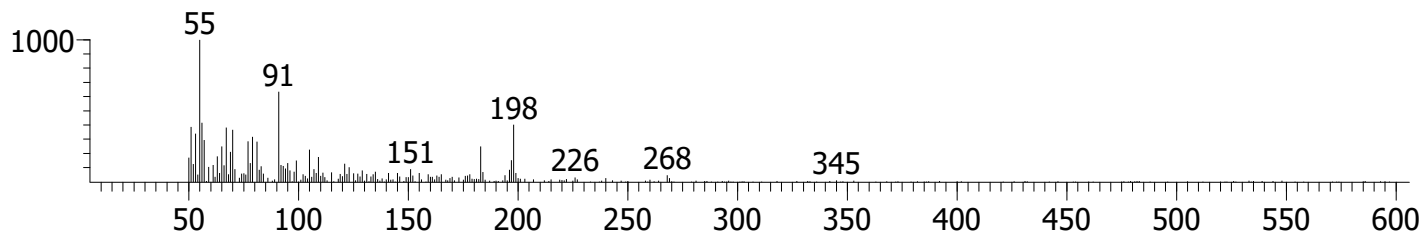

Peak True - sample "AerMBR C 091919 (20191119):1", peak 3423, at 1854.71 , 2.171 sec , sec (Spec # 2086 19)

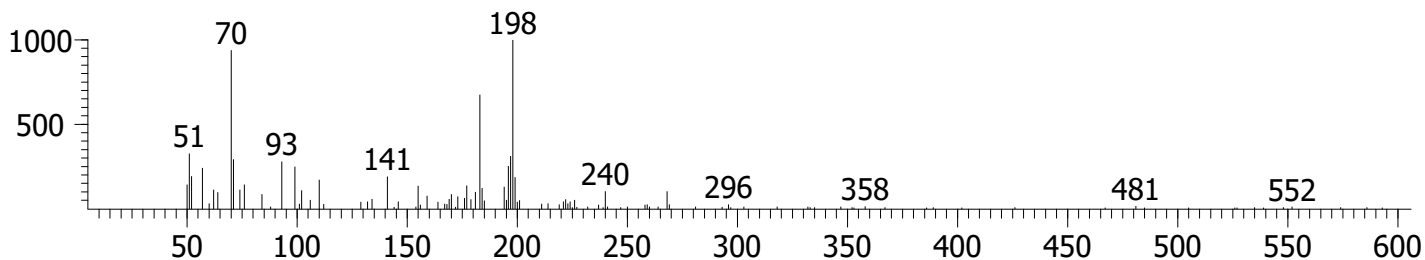

Library Hit - similarity 701, "Benzene, 1-fluoro-4-(2-phenylethenyl)-, (E)-"

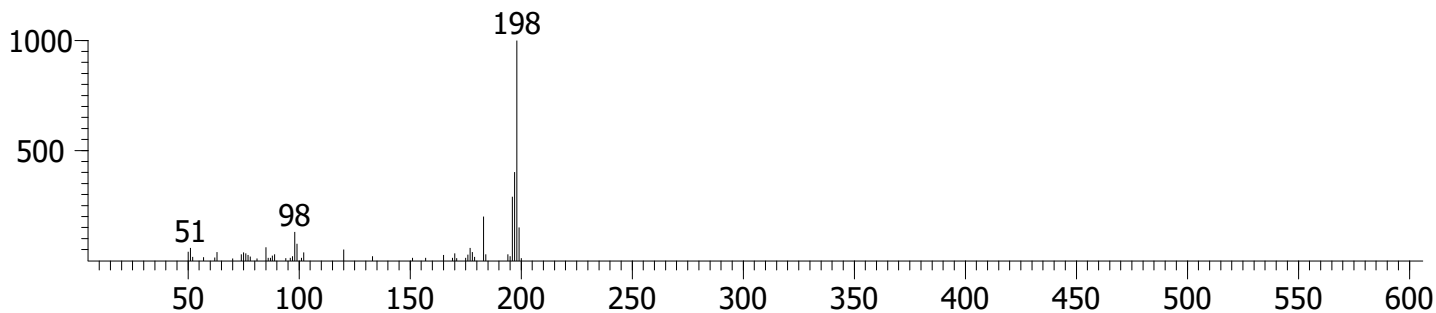

| Hit | Name                                              | Similarity | Probability | CAS        | Library | Formula  | Weight |
|-----|---------------------------------------------------|------------|-------------|------------|---------|----------|--------|
| 1   | Benzene, 1-fluoro-4-(2-phenylethenyl)-, (E)-      | 701        | 6432        | 718-25-2   | mainlib | C14H11F  | 198    |
| 2   | Benzene, 1-fluoro-3-(2-phenylethenyl)-, (E)-      | 670        | 1753        | 3041-81-4  | mainlib | C14H11F  | 198    |
| 3   | Benzene, 1,1'-(1-fluoro-1,2-ethenediyl)bis-, (E)- | 629        | 400         | 671-19-2   | mainlib | C14H11F  | 198    |
| 4   | 2,5-Dimethyl-4-(4-aminophenyl)pyridine            | 629        | 400         | 71153-40-7 | mainlib | C13H14N2 | 198    |
| 5   | Benzene, 1-fluoro-4-(2-phenylethenyl)-            | 626        | 353         | 17404-69-2 | mainlib | C14H11F  | 198    |



:-1-(4-Isopropylphenyl)-3-(2-furyl)cyclopropa

1st Dimension R.T. = 1868.71  
2nd Dimension R.T. = 2.303  
Quant Mass(es) = 183  
S/N = 116.12  
Area = 10252  
Height = 890.27  
Similarity = 631

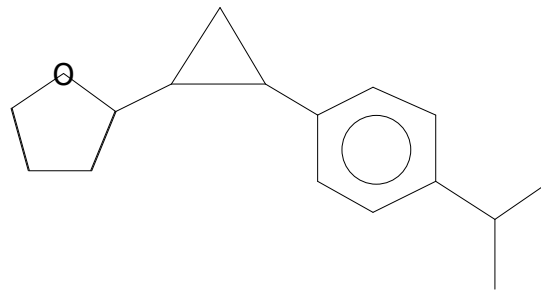

Peak Apex - sample "AerMBR B 091919 (20191119):1", peak 3574, at 1868.71 , 2.303 sec , sec (Spec # 2107 59)

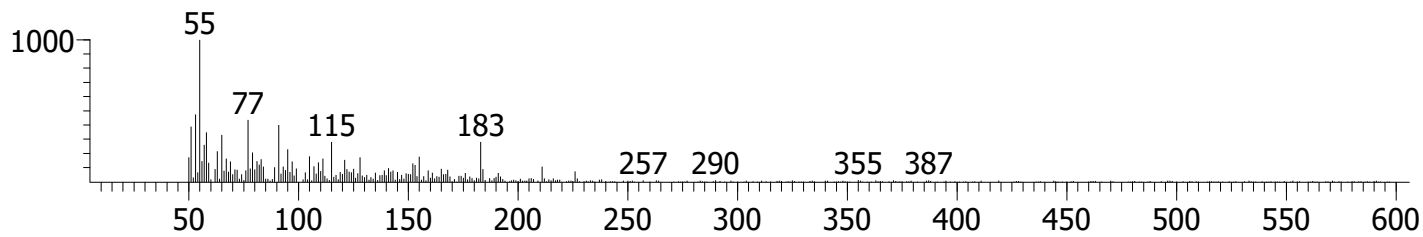

Peak True - sample "AerMBR B 091919 (20191119):1", peak 3574, at 1868.71 , 2.303 sec , sec (Spec # 2107 59)

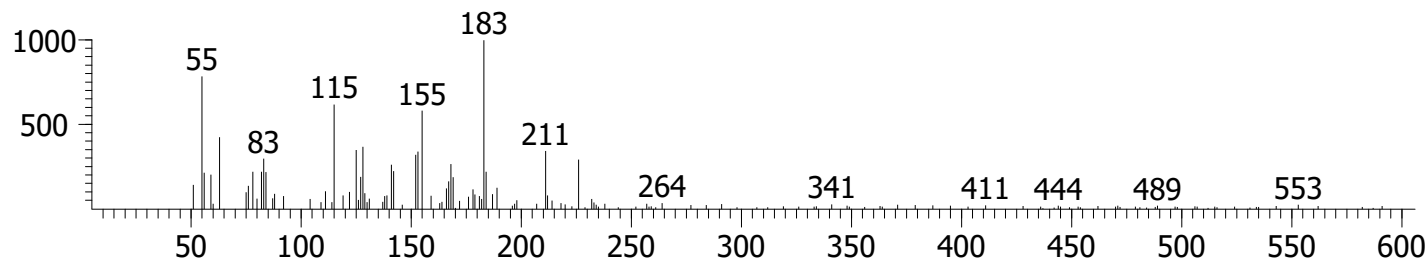

Library Hit - similarity 631, "cis-1-(4-Isopropylphenyl)-3-(2-furyl)cyclopropane"

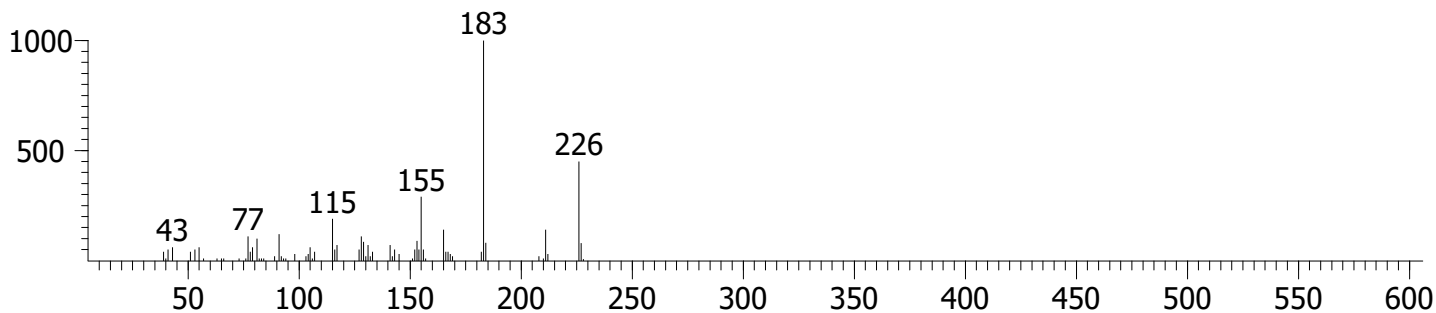

| Hit | Name                                                        | Similarity | Probability | CAS        | Library | Formula | Weight |
|-----|-------------------------------------------------------------|------------|-------------|------------|---------|---------|--------|
| 1   | cis-1-(4-Isopropylphenyl)-3-(2-furyl)cyclopropane           | 631        | 3856        | 84922-05-4 | mainlib | C16H18O | 226    |
| 2   | Cyclopropane, 1,1,2,2-tetramethyl-3-(2-phenylethenylideno)- | 607        | 1292        | 0-00-0     | mainlib | C15H18  | 198    |
| 3   | Azulene, 1,4-dimethyl-7-(1-methylethyl)-                    | 606        | 1242        | 489-84-9   | mainlib | C15H18  | 198    |
| 4   | Naphthalene, 1,6-dimethyl-4-(1-methylethyl)-                | 596        | 876         | 483-78-3   | mainlib | C15H18  | 198    |
| 5   | [1,1'-Biphenyl]-2-ol, 3-(1,1-dimethylethyl)-                | 567        | 248         | 2416-98-0  | mainlib | C16H18O | 226    |

## Trioxsalen

1st Dimension R.T. = 1875.7  
2nd Dimension R.T. = 2.383  
Quant Mass(es) = 200  
S/N = 516.87  
Area = 39733  
Height = 3441.0  
Similarity = 701

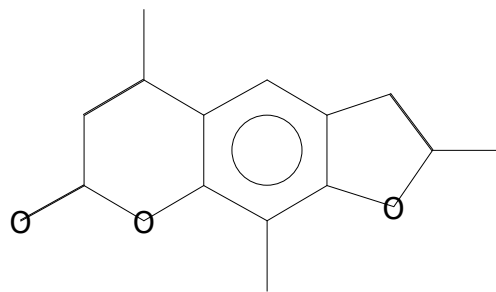

Peak Apex - sample "AerMBR B 091919 (20191119):1", peak 3585, at 1875.7 , 2.383 sec , sec (Spec # 21183 1)

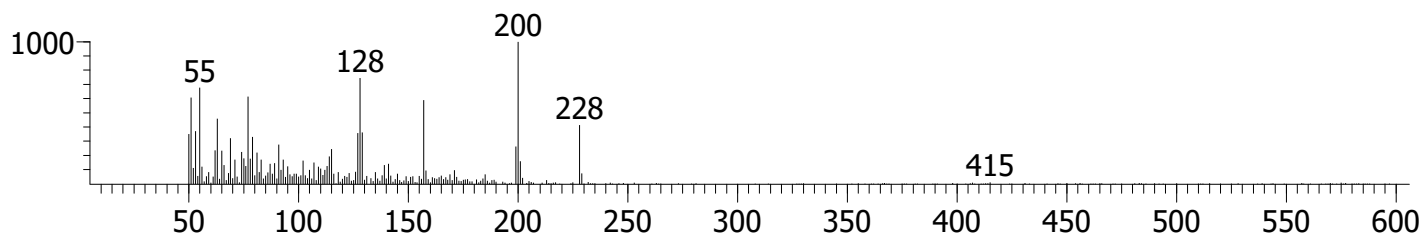

Peak True - sample "AerMBR B 091919 (20191119):1", peak 3585, at 1875.7 , 2.383 sec , sec (Spec # 21183 1)

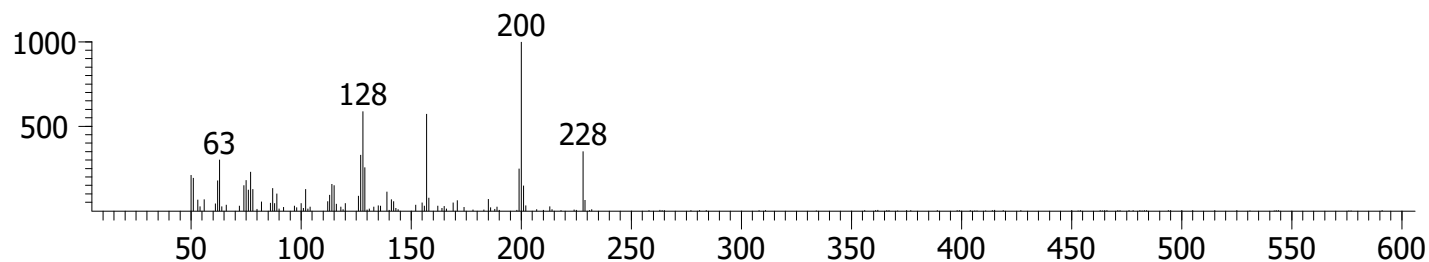

Library Hit - similarity 701, "Trioxsalen"

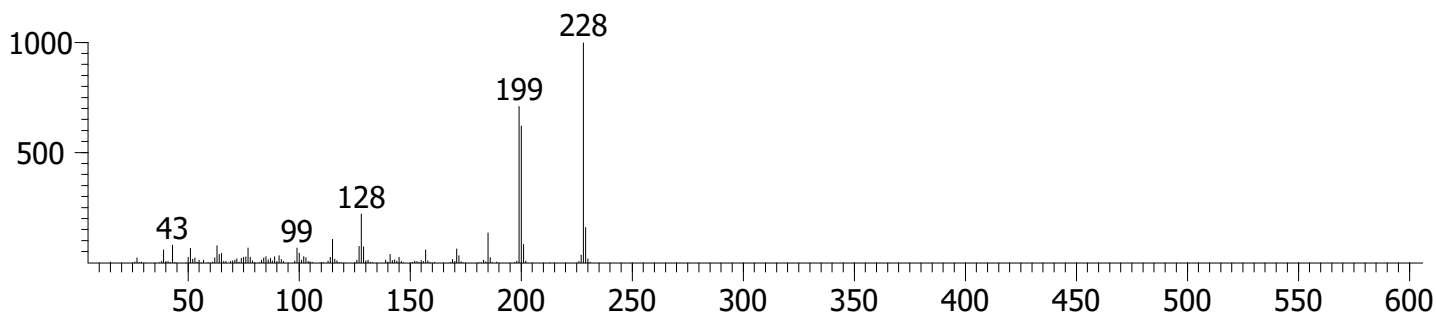

| Hit | Name                                                     | Similarity | Probability | CAS        | Library | Formula  | Weight |
|-----|----------------------------------------------------------|------------|-------------|------------|---------|----------|--------|
| 1   | Trioxsalen                                               | 701        | 1880        | 3902-71-4  | mainlib | C14H12O3 | 228    |
| 2   | 2-(2-Methoxyphenyl)phenol                                | 698        | 1661        | 3594-88-5  | mainlib | C13H12O2 | 200    |
| 3   | 7H-Furo[3,2-g][1]benzopyran-7-one, 2,3,5-trimethyl-      | 692        | 1306        | 13008-11-2 | mainlib | C14H12O3 | 228    |
| 4   | Naphtho[1,2-b]furan-4,5-dione, 2,3-dihydro-3,6-dimethyl- | 685        | 1000        | 23473-44-1 | mainlib | C14H12O3 | 228    |
| 5   | 4-Phenyl-2-(2-oxopropyl)furan                            | 669        | 576         | 0-00-0     | mainlib | C13H12O2 | 200    |

Ethanone,  
roxy-5-methoxy-2,2-dimethyl-2H-1-benzopyr

1st Dimension R.T. = 1896.69  
2nd Dimension R.T. = 2.204  
Quant Mass(es) = 233  
S/N = 132.74  
Area = 12996  
Height = 1385.3  
Similarity = 679

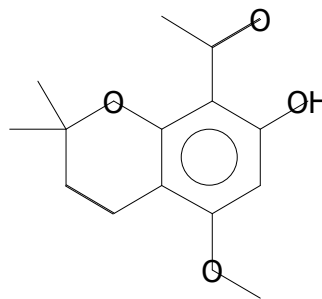

Peak Apex - sample "AerMBR B 091919 (20191119):1", peak 3615, at 1896.69 , 2.204 sec , sec (Spec # 2149 84)

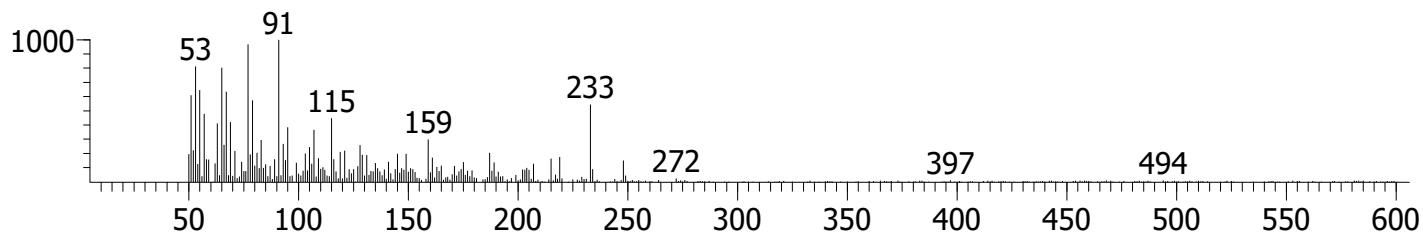

Peak True - sample "AerMBR B 091919 (20191119):1", peak 3615, at 1896.69 , 2.204 sec , sec (Spec # 2149 84)

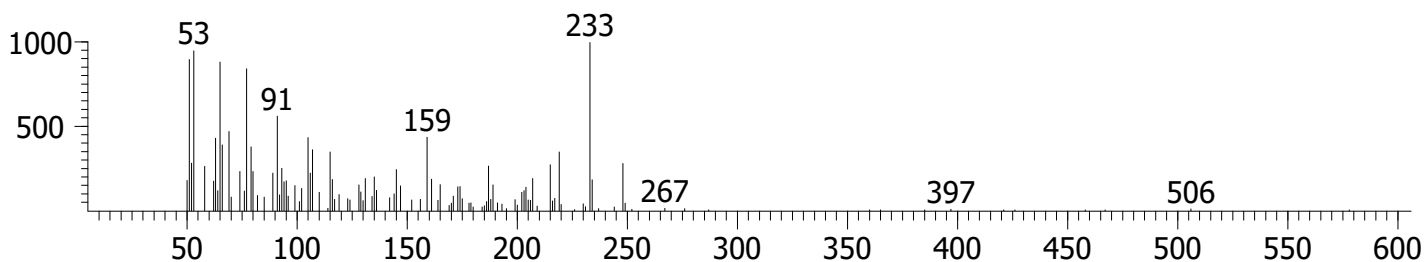

Library Hit - similarity 679, "Ethanone, 1-(7-hydroxy-5-methoxy-2,2-dimethyl-2H-1-benzopyran-8-yl)-"

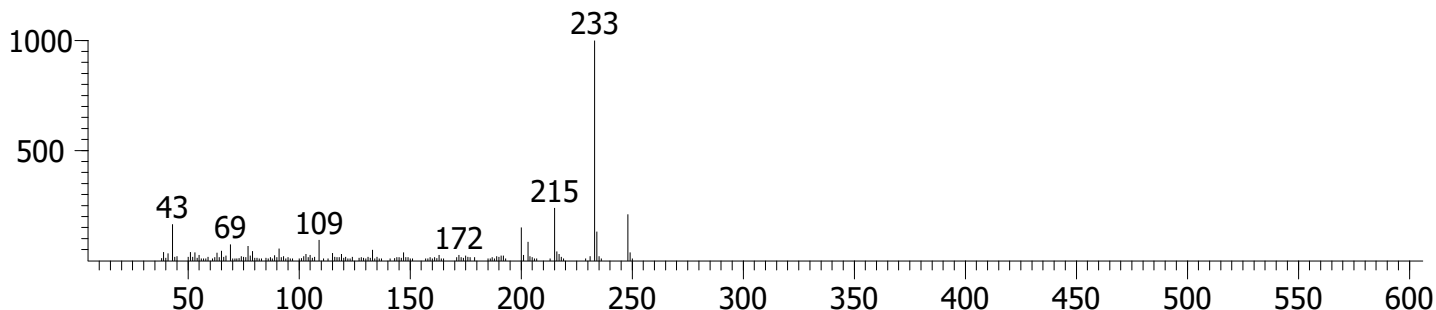

| Hit | Name                                                                 | Similarity | Probability | CAS        | Library | Formula                                           | Weight |
|-----|----------------------------------------------------------------------|------------|-------------|------------|---------|---------------------------------------------------|--------|
| 1   | Ethanone, 1-(7-hydroxy-5-methoxy-2,2-dimethyl-2H-1-benzopyran-8-yl)- | 679        | 4444        | 484-18-4   | mainlib | C <sub>14</sub> H <sub>16</sub> O <sub>4</sub>    | 248    |
| 2   | 2,4,6-Triisopropylbenzoic acid                                       | 623        | 847         | 49623-71-4 | mainlib | C <sub>16</sub> H <sub>24</sub> O <sub>2</sub>    | 248    |
| 3   | 4-(Trimethylsilyloxy)-6-methylcoumarin                               | 612        | 581         | 0-00-0     | mainlib | C <sub>13</sub> H <sub>16</sub> O <sub>3</sub> Si | 248    |
| 4   | Powelline, 6-hydroxy-                                                | 595        | 317         | 31128-98-0 | mainlib | C <sub>17</sub> H <sub>19</sub> NO <sub>5</sub>   | 317    |
| 5   | 1-(3,5-Di-tert-butyl-4-hydroxyphenyl)-2-bromethanone                 | 593        | 292         | 14386-64-2 | mainlib | C <sub>16</sub> H <sub>23</sub> BrO <sub>2</sub>  | 326    |

## 2-Benzothiazolamine, 5,6-dimethyl-

1st Dimension R.T. = 1959.65  
2nd Dimension R.T. = 2.904  
Quant Mass(es) = 178  
S/N = 77.319  
Area = 8052.9  
Height = 649.93  
Similarity = 645

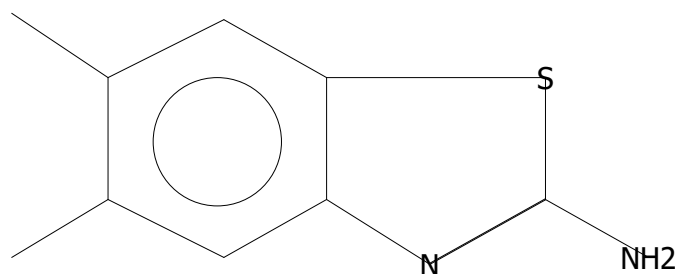

Peak Apex - sample "AerMBR B 091919 (20191119):1", peak 3729, at 1959.65 , 2.904 sec , sec (Spec # 2246 30)

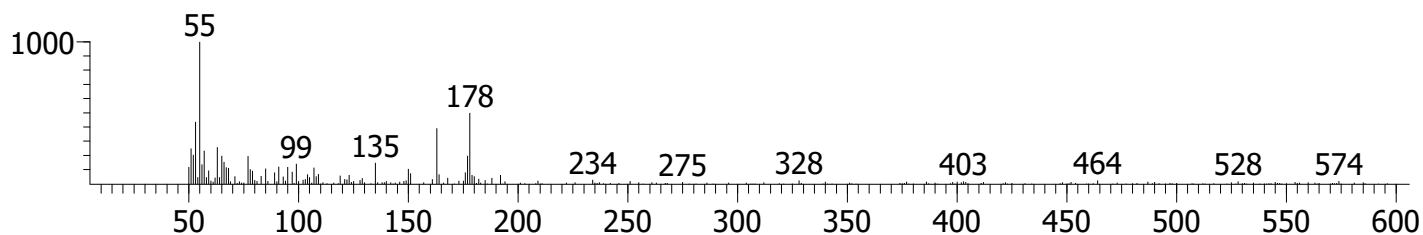

Peak True - sample "AerMBR B 091919 (20191119):1", peak 3729, at 1959.65 , 2.904 sec , sec (Spec # 2246 30)

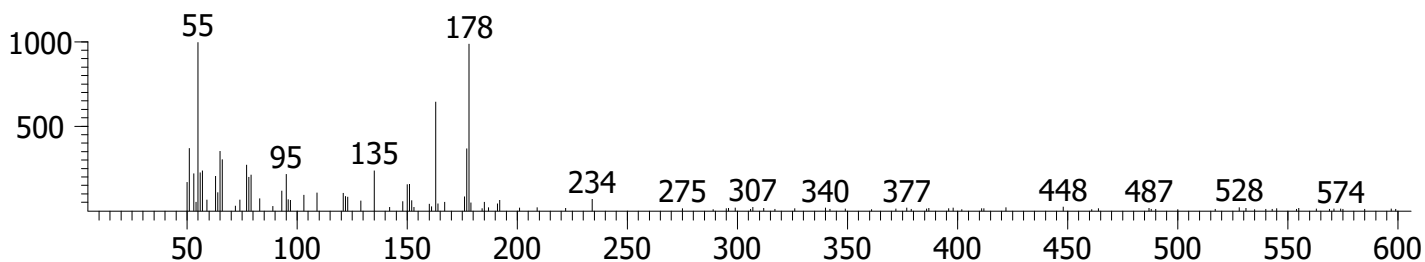

Library Hit - similarity 645, "2-Benzothiazolamine, 5,6-dimethyl-"

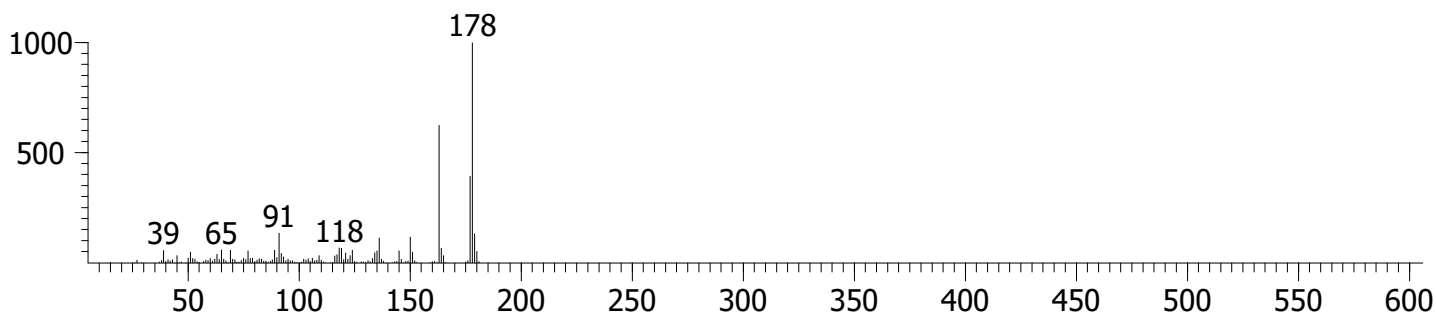

| Hit | Name                                                               | Similarity | Probability | CAS         | Library | Formula   | Weight |
|-----|--------------------------------------------------------------------|------------|-------------|-------------|---------|-----------|--------|
| 1   | 2-Benzothiazolamine, 5,6-dimethyl-                                 | 645        | 2293        | 29927-08-0  | mainlib | C9H10N2S  | 178    |
| 2   | 6-Methoxy-1-methyl-1,2,3,4-tetrahydroisoquinolin-7-ol              | 608        | 558         | 4593-97-9   | mainlib | C11H15NO2 | 193    |
| 3   | 2-Benzothiazolamine, 4,6-dimethyl-                                 | 602        | 438         | 64036-71-1  | mainlib | C9H10N2S  | 178    |
| 4   | 2-Isopropylidene-5,6,7,8-tetrahydro-2H-imidazo[1,2-a]pyridin-3-one | 601        | 421         | 172882-45-0 | mainlib | C10H14N2O | 178    |
| 5   | Pyridine, 2,6-epidioxo-5-ethyl-3-iminomethyl-4-methyl-             | 600        | 405         | 0-00-0      | mainlib | C9H10N2O2 | 178    |

# i-Isopropyl-3,8-dimethylazulene-1-carbonitril

1st Dimension R.T. = 1991.14  
2nd Dimension R.T. = 2.198  
Quant Mass(es) = 208  
S/N = 161.49  
Area = 14723  
Height = 1534.4  
Similarity = 724

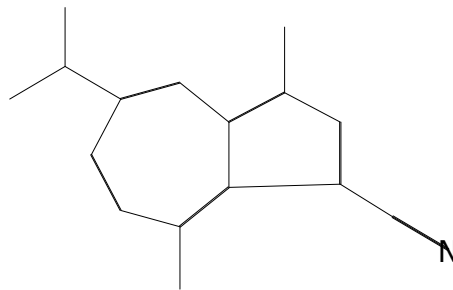

Peak Apex - sample "AerMBR B 091919 (20191119):1", peak 3781, at 1991.14 , 2.198 sec , sec (Spec # 2292 93)

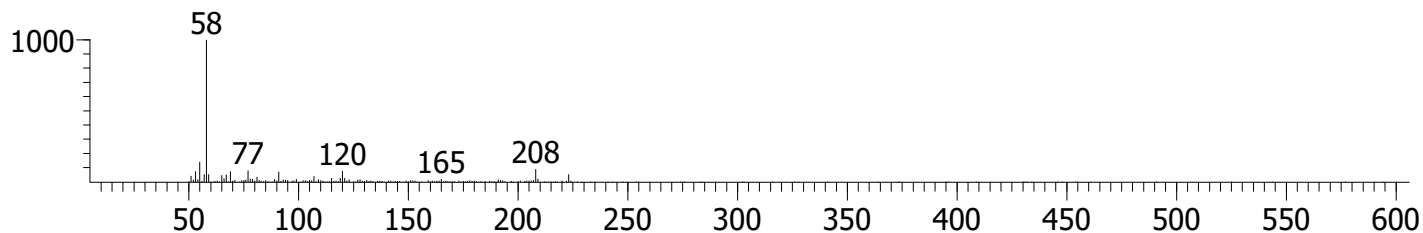

Peak True - sample "AerMBR B 091919 (20191119):1", peak 3781, at 1991.14 , 2.198 sec , sec (Spec # 2292 93)

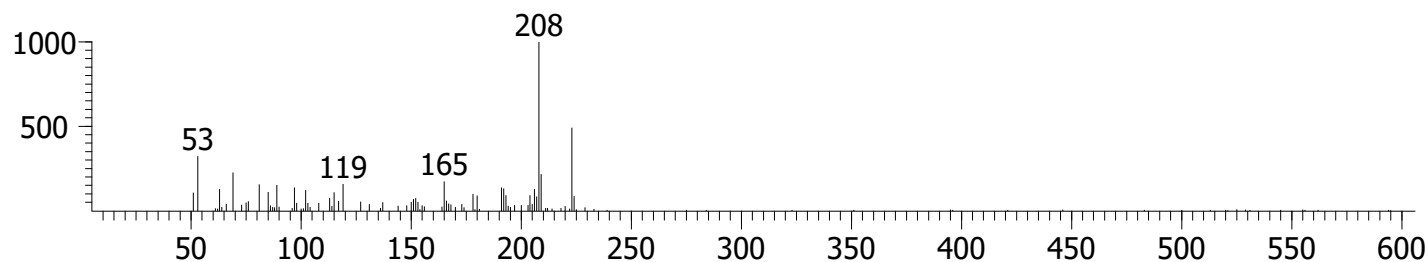

Library Hit - similarity 724, "5-Isopropyl-3,8-dimethylazulene-1-carbonitrile"

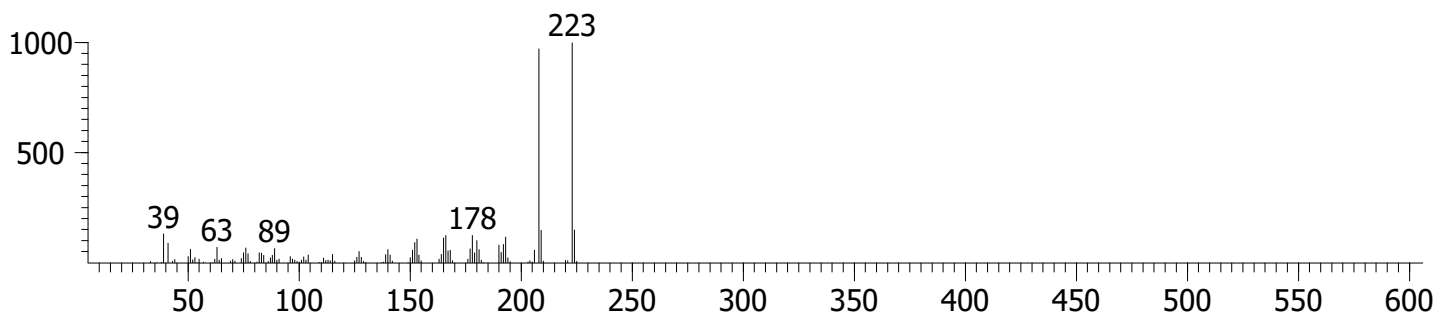

| Hit | Name                                              | Similarity | Probability | CAS         | Library | Formula    | Weight |
|-----|---------------------------------------------------|------------|-------------|-------------|---------|------------|--------|
| 1   | 5-Isopropyl-3,8-dimethylazulene-1-carbonitrile    | 724        | 4733        | 93007-54-6  | mainlib | C16H17N    | 223    |
| 2   | Acridine, 9,10-dihydro-9,9,10-trimethyl-          | 707        | 2583        | 25308-77-4  | mainlib | C16H17N    | 223    |
| 3   | 4-Ethyl-10H-acridin-9-one                         | 660        | 540         | 142726-22-5 | mainlib | C15H13NO   | 223    |
| 4   | 3-Acetyl-9-methylcarbazole                        | 641        | 262         | 1484-05-5   | mainlib | C15H13NO   | 223    |
| 5   | 2'-Hydroxy-6'-methoxyacetophenone, TMS derivative | 628        | 169         | 0-00-0      | mainlib | C12H18O3Si | 238    |

## Danthron

1st Dimension R.T. = 2005.13

2nd Dimension R.T. = 2.501

Quant Mass(es) = 240

S/N = 147.55

Area = 8649.8

Height = 926.39

Similarity = 730

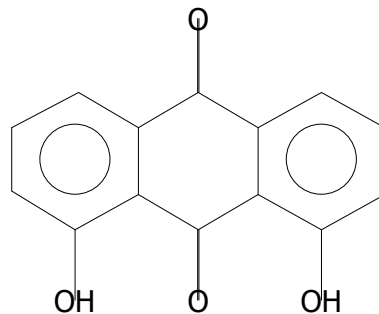

Peak Apex - sample "AerMBR B 091919 (20191119):1", peak 3802, at 2005.13 , 2.501 sec , sec (Spec # 2314 59)

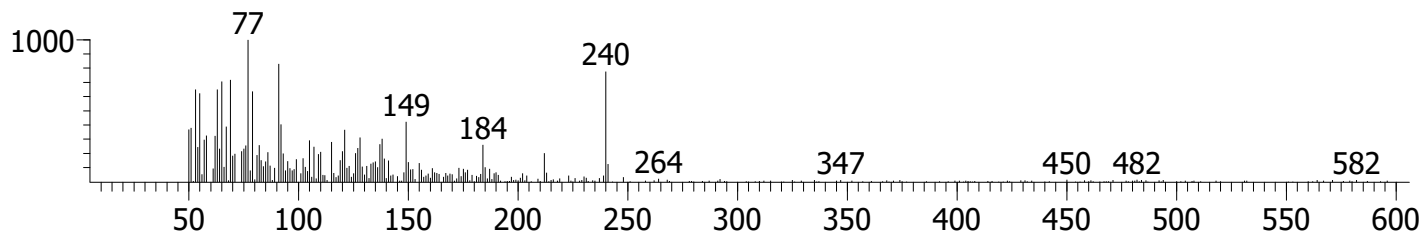

Peak True - sample "AerMBR B 091919 (20191119):1", peak 3802, at 2005.13 , 2.501 sec , sec (Spec # 2314 59)

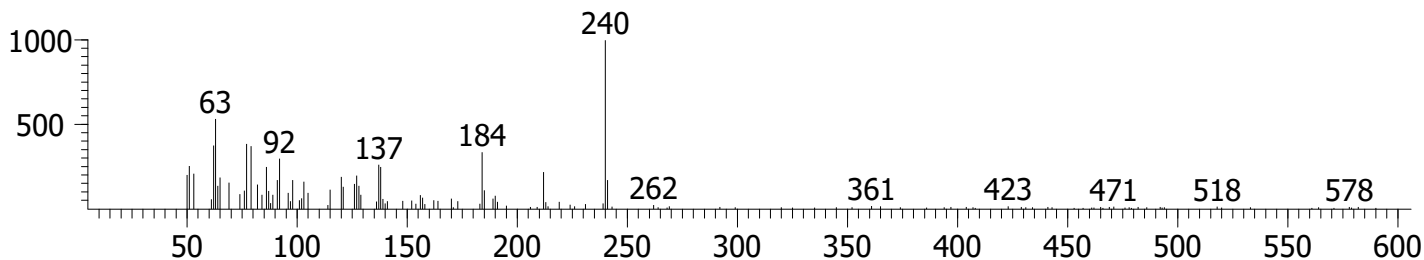

Library Hit - similarity 730, "Danthron"

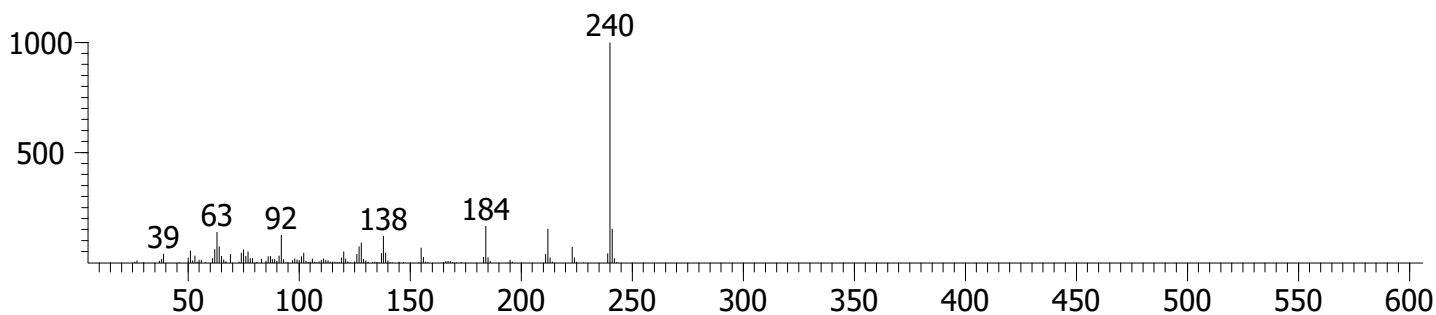

| Hit | Name                                                                                 | Similarity | Probability | CAS        | Library | Formula    | Weight |
|-----|--------------------------------------------------------------------------------------|------------|-------------|------------|---------|------------|--------|
| 1   | Danthron                                                                             | 730        | 7244        | 117-10-2   | mainlib | C14H8O4    | 240    |
| 2   | 9,10-Anthracenedione, 1,5-dihydroxy-                                                 | 671        | 1309        | 117-12-4   | mainlib | C14H8O4    | 240    |
| 3   | Alizarin                                                                             | 644        | 385         | 72-48-0    | mainlib | C14H8O4    | 240    |
| 4   | Phenol, 2-[5-(2-furanyl)pyrazol-3-yl]-5-methyl-                                      | 626        | 198         | 84637-15-0 | mainlib | C14H12N2O2 | 240    |
| 5   | 2-(4,6-Bis-ethylamino-[1,3,5]triazin-2-ylsulfanyl)-N-(2,4-dimethyl-phenyl)-acetamide | 611        | 120         | 0-00-0     | mainlib | C17H24N6OS | 360    |

## Oxcarbazepine

1st Dimension R.T. = 2204.51  
2nd Dimension R.T. = 3.300  
Quant Mass(es) = 180  
S/N = 183.48  
Area = 34896  
Height = 2339.6  
Similarity = 911

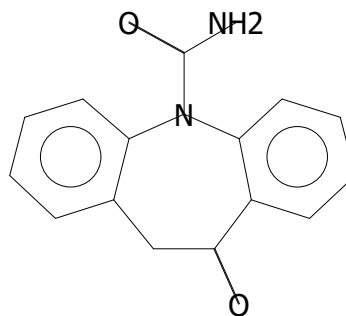

Peak Apex - sample "AerMBR B 091919 (20191119):1", peak 4079, at 2204.51 , 3.300 sec , sec (Spec # 2617 90)

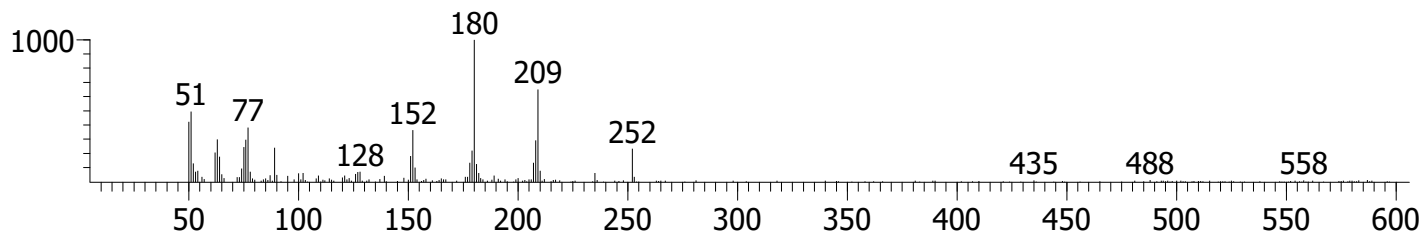

Peak True - sample "AerMBR B 091919 (20191119):1", peak 4079, at 2204.51 , 3.300 sec , sec (Spec # 2617 90)

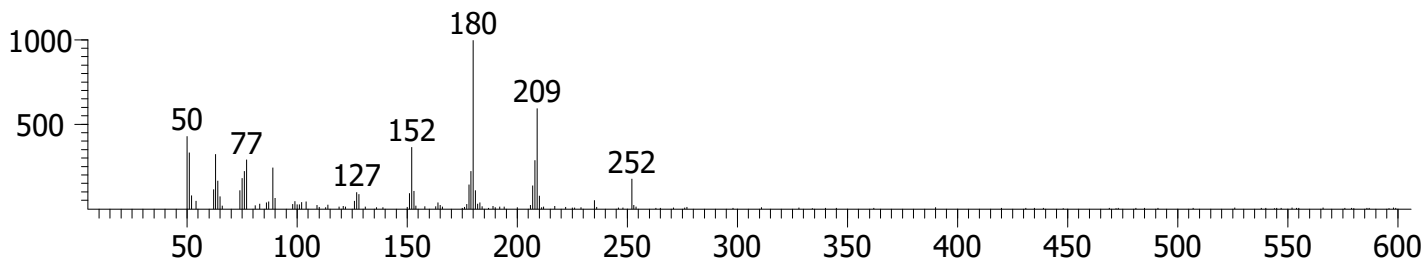

Library Hit - similarity 911, "Oxcarbazepine"

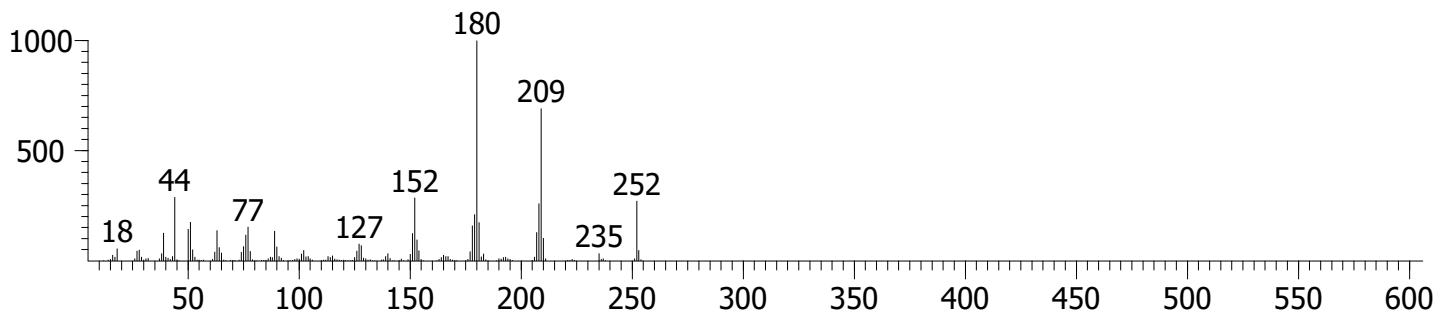

| Hit | Name                                       | Similarity | Probability | CAS        | Library | Formula                                                       | Weight |
|-----|--------------------------------------------|------------|-------------|------------|---------|---------------------------------------------------------------|--------|
| 1   | Oxcarbazepine                              | 911        | 8547        | 28721-07-5 | mainlib | C <sub>15</sub> H <sub>12</sub> N <sub>2</sub> O <sub>2</sub> | 252    |
| 2   | 5,11-Dihydro-10H-dibenzo[b,f]azepin-10-one | 827        | 803         | 21737-58-6 | mainlib | C <sub>14</sub> H <sub>11</sub> NO                            | 209    |
| 3   | 4-(2-(4-Formylphenyl)ethenyl)pyridine      | 797        | 223         | 74401-03-9 | mainlib | C <sub>14</sub> H <sub>11</sub> NO                            | 209    |
| 4   | 2-Methyl-acridone                          | 783        | 139         | 23864-43-9 | mainlib | C <sub>14</sub> H <sub>11</sub> NO                            | 209    |
| 5   | 4-Methyl-acridone                          | 775        | 104         | 68506-36-5 | mainlib | C <sub>14</sub> H <sub>11</sub> NO                            | 209    |

# Pyridine, 3-ethyl-

1st Dimension R.T. = 542.964  
2nd Dimension R.T. = 1.492  
Quant Mass(es) = 92  
S/N = 4342.3  
Area = 1557986  
Height = 197197  
Similarity = 961

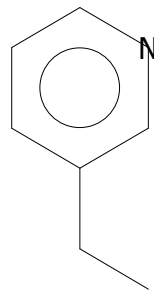

Peak Apex - sample "AnMbr C (20191120):1", peak 140, at 542.964 , 1.492 sec , sec (Spec # 9766)

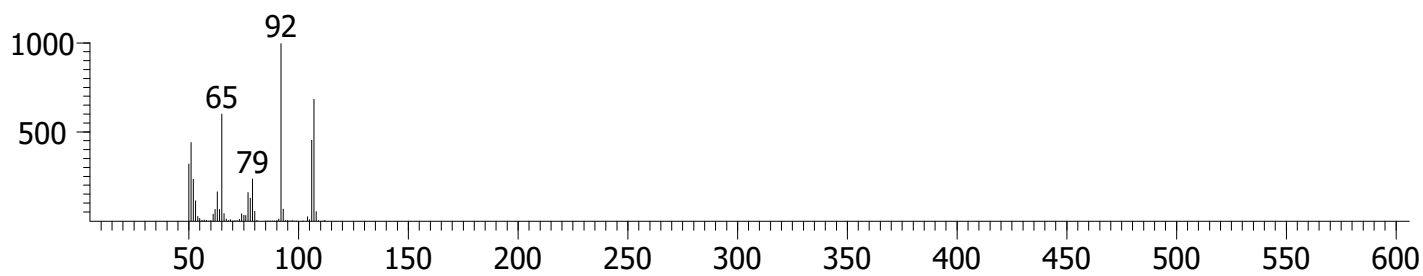

Peak True - sample "AnMbr C (20191120):1", peak 140, at 542.964 , 1.492 sec , sec (Spec # 9766)

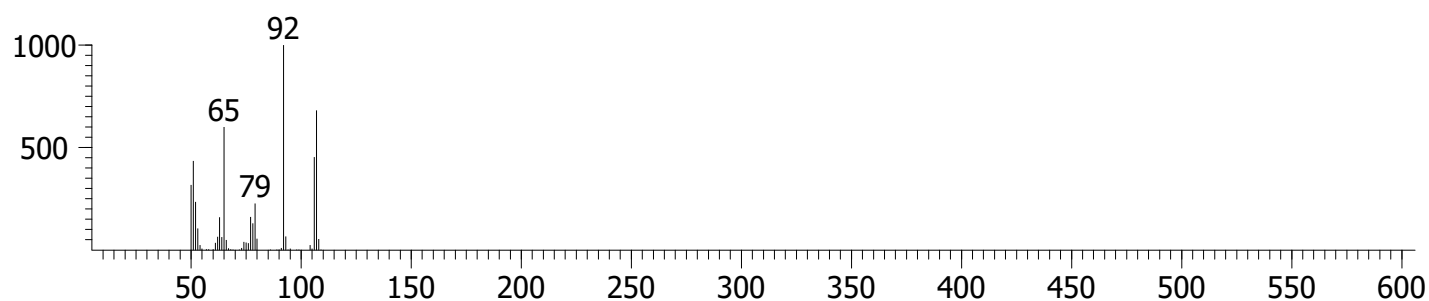

Library Hit - similarity 961, "Pyridine, 3-ethyl-"

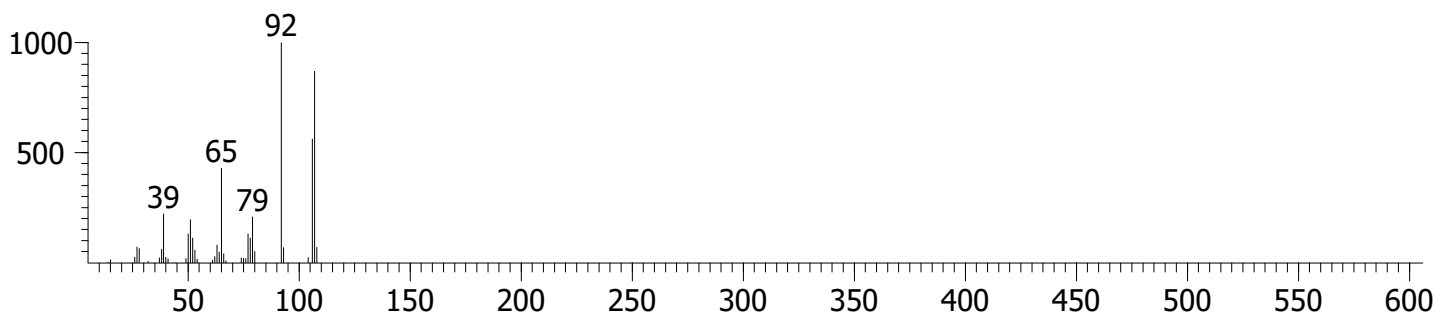

| Hit | Name                             | Similarity | Probability | CAS      | Library | Formula  | Weight |
|-----|----------------------------------|------------|-------------|----------|---------|----------|--------|
| 1   | Pyridine, 3-ethyl-               | 961        | 9150        | 536-78-7 | mainlib | C7H9N    | 107    |
| 2   | Pyridine, 4-ethyl-               | 835        | 405         | 536-75-4 | mainlib | C7H9N    | 107    |
| 3   | 1,4-Dimethyl-pyridinium chloride | 820        | 245         | 0-00-0   | mainlib | C7H10CIN | 143    |
| 4   | Pyridine, 3,5-dimethyl-          | 776        | 53          | 591-22-0 | mainlib | C7H9N    | 107    |
| 5   | Pyridine, 3,4-dimethyl-          | 759        | 29          | 583-58-4 | mainlib | C7H9N    | 107    |



## Ethanone, 1-(3-pyridinyl)-

1st Dimension R.T. = 745.848

2nd Dimension R.T. = 1.960

Quant Mass(es) = 106

S/N = 82.822

Area = 16703

Height = 2095.8

Similarity = 754

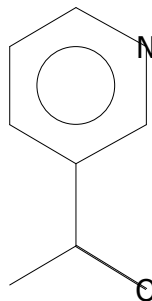

Peak Apex - sample "AnMbr C (20191120):1", peak 711, at 745.848 , 1.960 sec , sec (Spec # 40577)

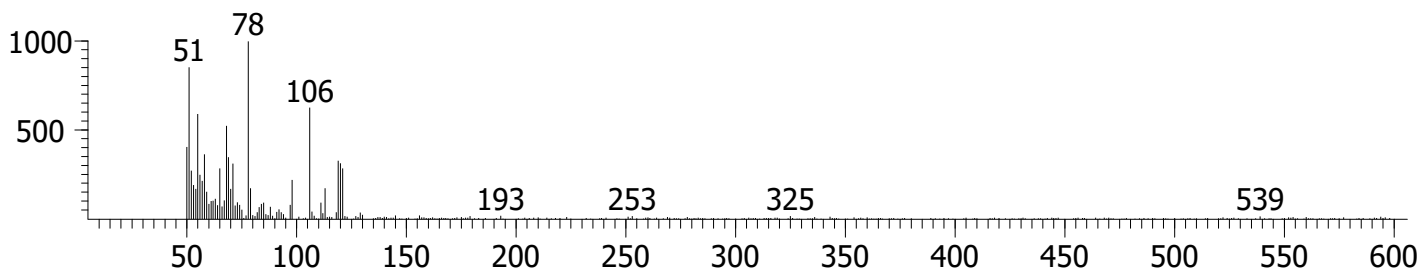

Peak True - sample "AnMbr C (20191120):1", peak 711, at 745.848 , 1.960 sec , sec (Spec # 40577)

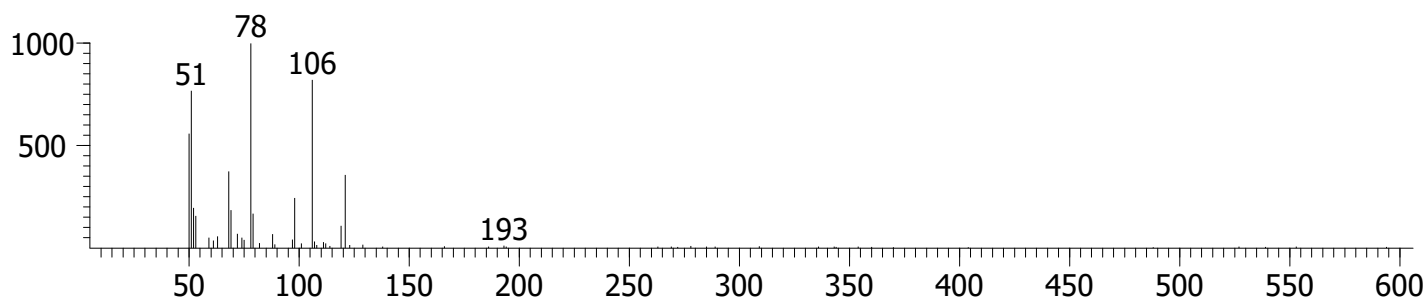

Library Hit - similarity 754, "Ethanone, 1-(3-pyridinyl)-"

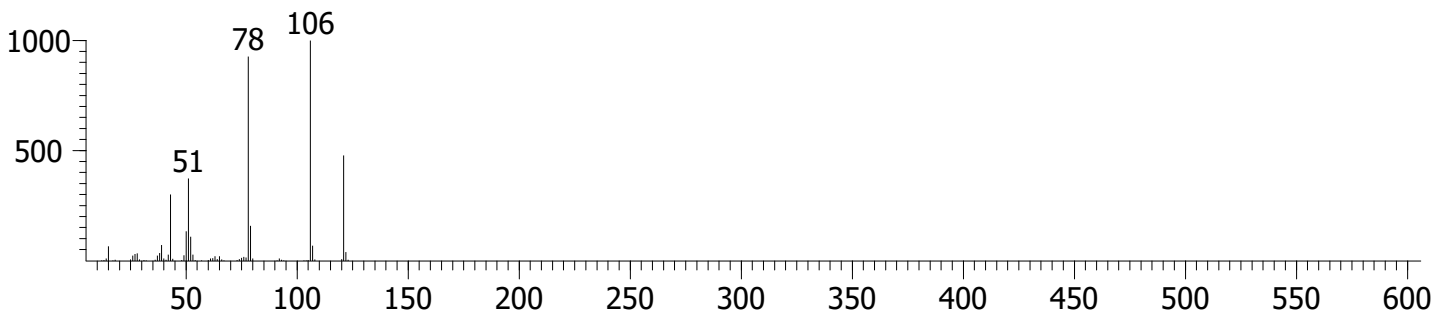

| Hit | Name                                                                                  | Similarity | Probability | CAS         | Library | Formula      | Weight |
|-----|---------------------------------------------------------------------------------------|------------|-------------|-------------|---------|--------------|--------|
| 1   | Ethanone, 1-(3-pyridinyl)-                                                            | 754        | 6834        | 350-03-8    | mainlib | C7H7NO       | 121    |
| 2   | N'-(3,4-Dihydroxybenzylidene)-3-pyridinohydrazide                                     | 683        | 973         | 315207-10-4 | mainlib | C13H11N3O3   | 257    |
| 3   | 3-Pyridinecarboxamide, N-[5-phenyl-4-(trifluoromethyl)-2-thiazolyl]-                  | 657        | 291         | 0-00-0      | mainlib | C16H10F3N3OS | 349    |
| 4   | Butanoic acid, 2-acetyl-4,4,4-trifluoro-3-trifluoromethyl-3-(3-pyridylcarbonylamino)- | 647        | 205         | 0-00-0      | mainlib | C15H14F6N2O4 | 400    |
| 5   | N-(3-Methoxy-5-tetrazol-1-yl-phenyl)-isonicotinamide                                  | 640        | 157         | 0-00-0      | mainlib | C14H12N6O2   | 296    |

### 3-Pyridinol, 2-methyl-

1st Dimension R.T. = 777.33  
2nd Dimension R.T. = 1.769  
Quant Mass(es) = 80  
S/N = 130.57  
Area = 64125  
Height = 7156.2  
Similarity = 746

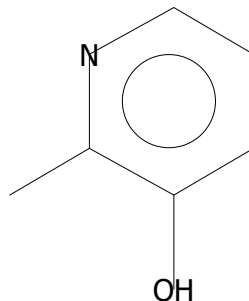

Peak Apex - sample "AnMbr C (20191120):1", peak 798, at 777.33 , 1.769 sec , sec (Spec # 45318)

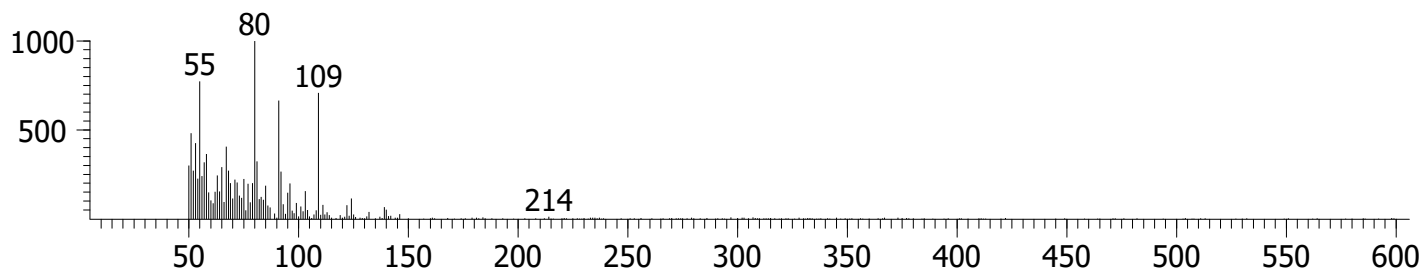

Peak True - sample "AnMbr C (20191120):1", peak 798, at 777.33 , 1.769 sec , sec (Spec # 45318)

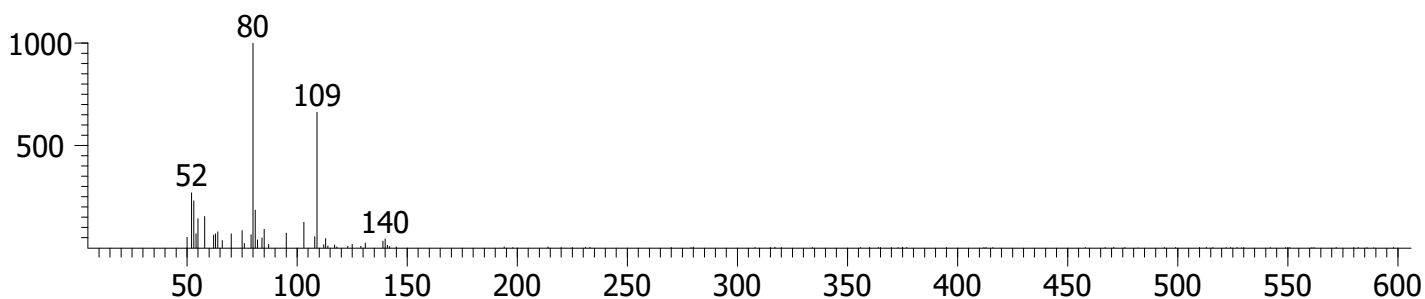

Library Hit - similarity 746, "3-Pyridinol, 2-methyl-"

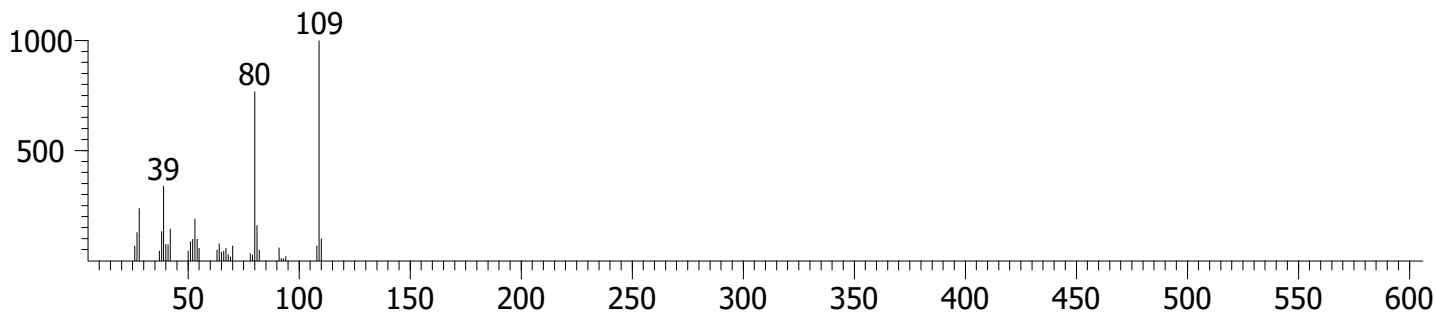

| Hit | Name                        | Similarity | Probability | CAS       | Library | Formula | Weight |
|-----|-----------------------------|------------|-------------|-----------|---------|---------|--------|
| 1   | 3-Pyridinol, 2-methyl-      | 746        | 4612        | 1121-25-1 | mainlib | C6H7NO  | 109    |
| 2   | 2(1H)-Pyridinone, 3-methyl- | 723        | 1684        | 1003-56-1 | mainlib | C6H7NO  | 109    |
| 3   | 2(1H)-Pyridinone, 5-methyl- | 717        | 1323        | 1003-68-5 | mainlib | C6H7NO  | 109    |
| 4   | Phenol, 4-amino-            | 698        | 642         | 123-30-8  | mainlib | C6H7NO  | 109    |
| 5   | 3-Pyridinol, 6-methyl-      | 691        | 492         | 1121-78-4 | mainlib | C6H7NO  | 109    |

## 2-tert-Butylthiazole

1st Dimension R.T. = 780.828  
2nd Dimension R.T. = 1.881  
Quant Mass(es) = 126  
S/N = 346.15  
Area = 35224  
Height = 4054.0  
Similarity = 636

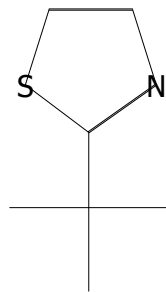

Peak Apex - sample "AnMbr C (20191120):1", peak 811, at 780.828 , 1.881 sec , sec (Spec # 45865)

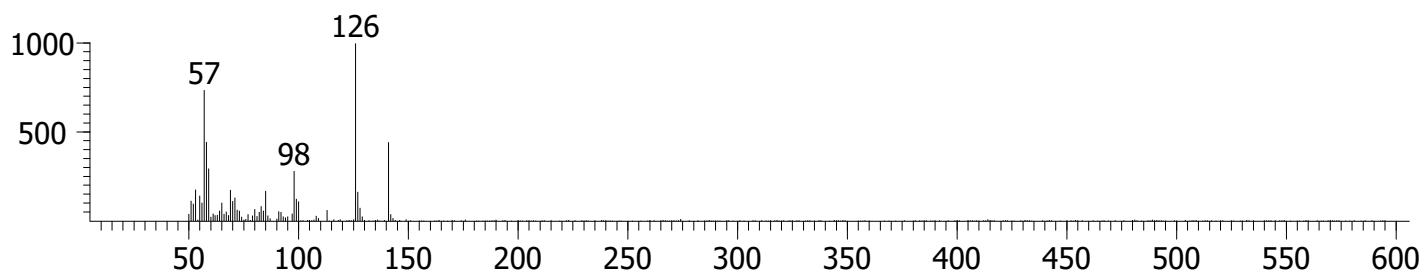

Peak True - sample "AnMbr C (20191120):1", peak 811, at 780.828 , 1.881 sec , sec (Spec # 45865)

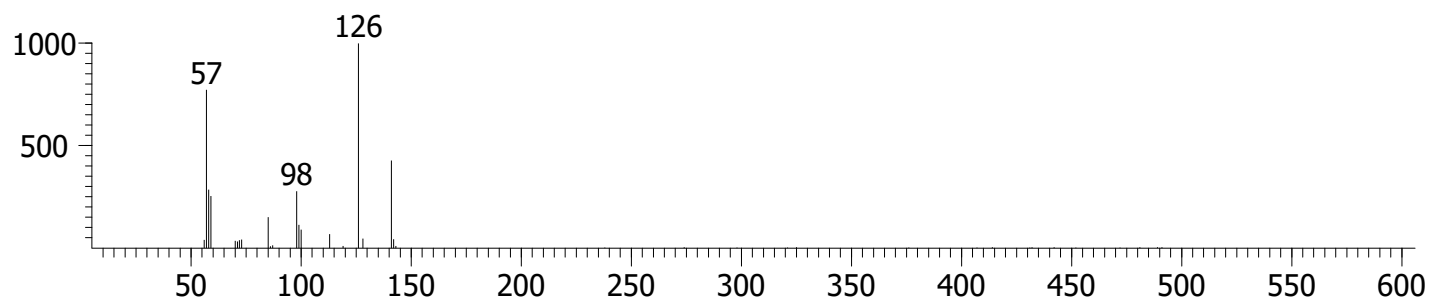

Library Hit - similarity 636, "2-tert-Butylthiazole"

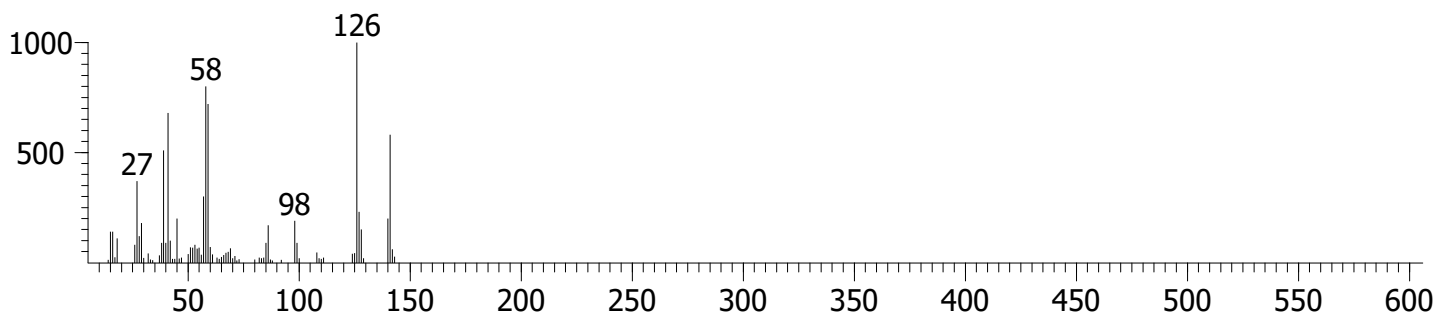

| Hit | Name                                                   | Similarity | Probability | CAS        | Library | Formula    | Weight |
|-----|--------------------------------------------------------|------------|-------------|------------|---------|------------|--------|
| 1   | 2-tert-Butylthiazole                                   | 636        | 2556        | 13623-12-6 | mainlib | C7H11NS    | 141    |
| 2   | 3-Fluoro-p-anisidine                                   | 618        | 1318        | 366-99-4   | mainlib | C7H8FNO    | 141    |
| 3   | 1,6-Heptadien-4-ol, (3-cyanopropyl)dimethylsilyl ether | 604        | 825         | 0-00-0     | mainlib | C13H23NOSi | 237    |
| 4   | Thiazole, 2-methyl-4-(1-methylethyl)-                  | 603        | 793         | 32272-52-9 | mainlib | C7H11NS    | 141    |
| 5   | 3-Fluoro-o-anisidine                                   | 594        | 575         | 437-83-2   | mainlib | C7H8FNO    | 141    |

# 1,5,5-Trimethyl-6-methylene-cyclohexene

1st Dimension R.T. = 868.278  
2nd Dimension R.T. = 1.525  
Quant Mass(es) = 121  
S/N = 4487.1  
Area = 953005  
Height = 121471  
Similarity = 870

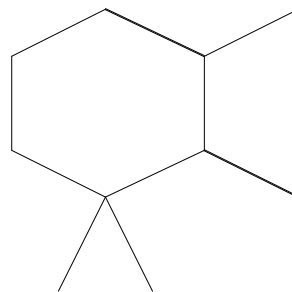

Peak Apex - sample "AnMbr C (20191120):1", peak 1145, at 868.278 , 1.525 sec , sec (Spec # 59061)

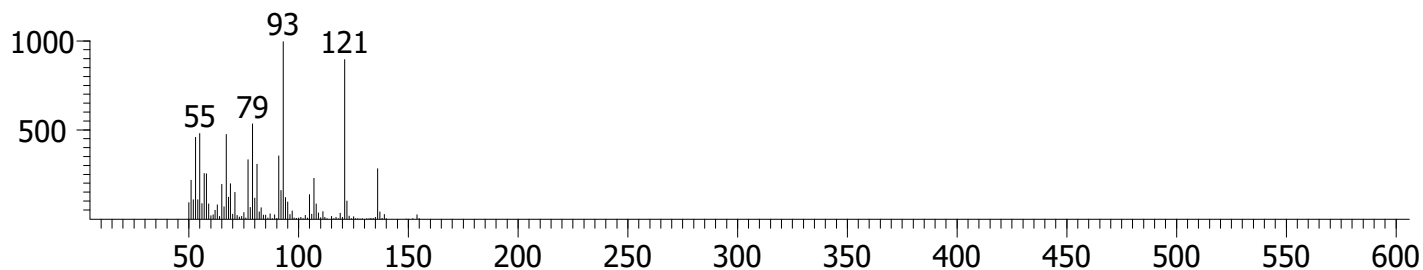

Peak True - sample "AnMbr C (20191120):1", peak 1145, at 868.278 , 1.525 sec , sec (Spec # 59061)

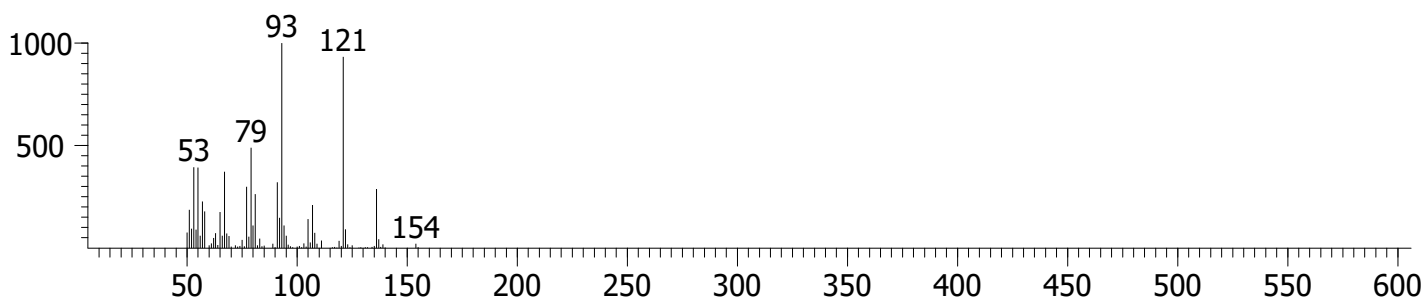

Library Hit - similarity 870, "1,5,5-Trimethyl-6-methylene-cyclohexene"

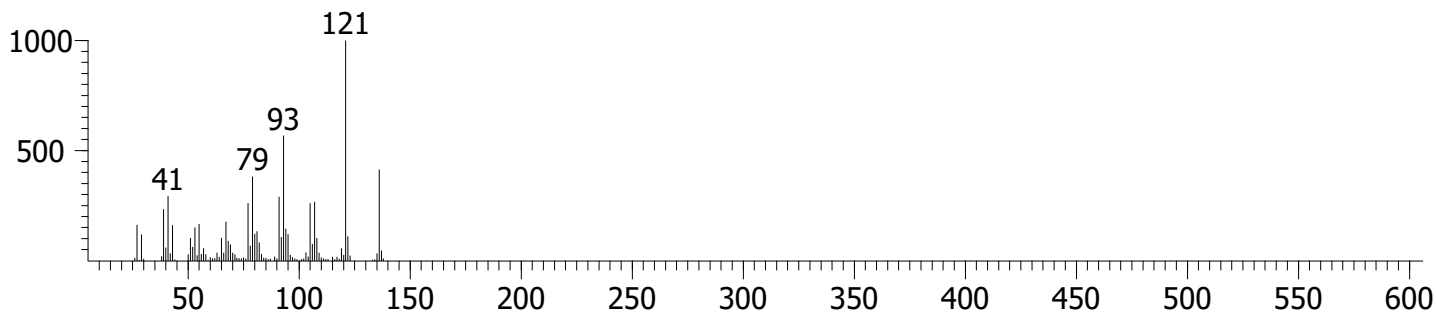

| Hit | Name                                                                    | Similarity | Probability | CAS        | Library | Formula  | Weight |
|-----|-------------------------------------------------------------------------|------------|-------------|------------|---------|----------|--------|
| 1   | 1,5,5-Trimethyl-6-methylene-cyclohexene                                 | 870        | 1131        | 514-95-4   | mainlib | C10H16   | 136    |
| 2   | Bicyclo[3.1.0]hexane, 6-isopropylidene-1-methyl-                        | 869        | 1087        | 24524-57-0 | mainlib | C10H16   | 136    |
| 3   | Camphene                                                                | 860        | 789         | 79-92-5    | mainlib | C10H16   | 136    |
| 4   | Bicyclo[2.2.1]heptane, 2,2-dimethyl-3-methylene-, (1S)-                 | 843        | 430         | 5794-04-7  | mainlib | C10H16   | 136    |
| 5   | (1R,3S,4R,5S)-1-Isopropyl-4-methylbicyclo[3.1.0]hexan-3-yl acetate-rel- | 841        | 397         | 62181-91-3 | mainlib | C12H20O2 | 196    |

# 5-Thiazoleethanol, 4-methyl-

1st Dimension R.T. = 997.704  
2nd Dimension R.T. = 2.059  
Quant Mass(es) = 112  
S/N = 1351.2  
Area = 605519  
Height = 62086  
Similarity = 882

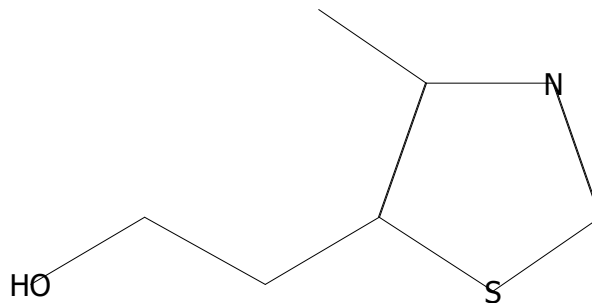

Peak Apex - sample "AnMbr C (20191120):1", peak 1776, at 997.704 , 2.059 sec , sec (Spec # 78752)

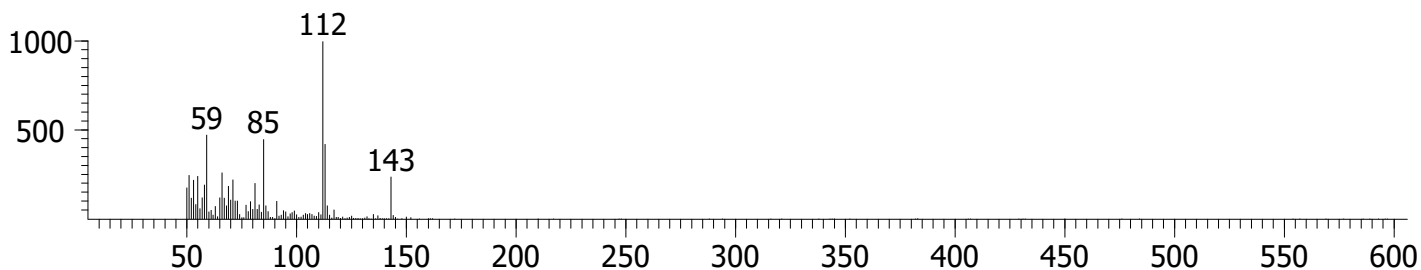

Peak True - sample "AnMbr C (20191120):1", peak 1776, at 997.704 , 2.059 sec , sec (Spec # 78752)

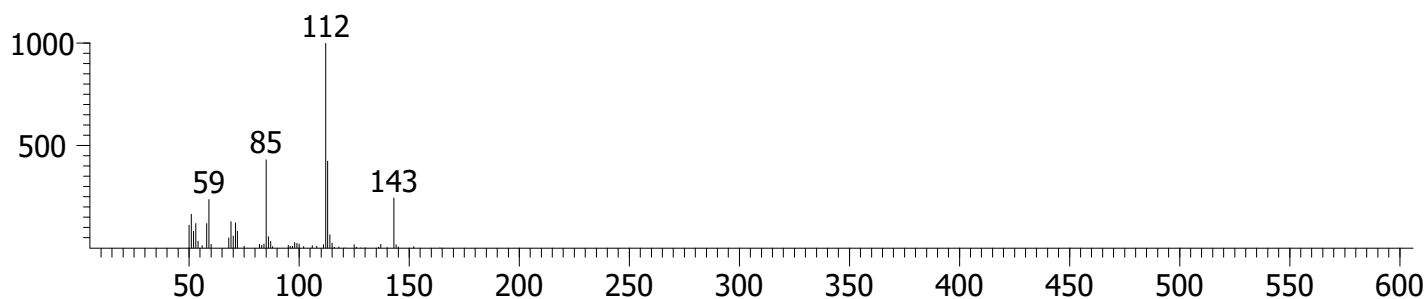

Library Hit - similarity 882, "5-Thiazoleethanol, 4-methyl-"

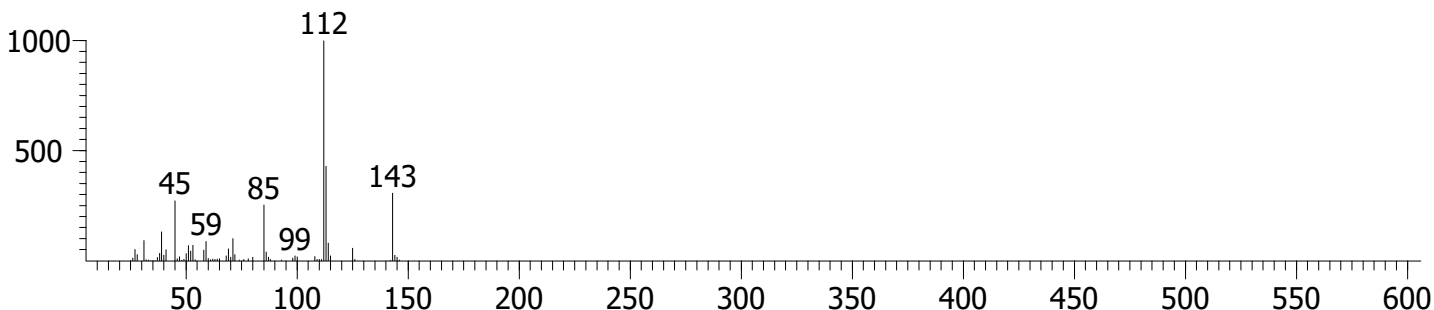

| Hit | Name                                   | Similarity | Probability | CAS        | Library | Formula  | Weight |
|-----|----------------------------------------|------------|-------------|------------|---------|----------|--------|
| 1   | 5-Thiazoleethanol, 4-methyl-           | 882        | 9434        | 137-00-8   | mainlib | C6H9NOS  | 143    |
| 2   | 5-Thiazoleacetaldehyde, 4-methyl-      | 754        | 404         | 18764-34-6 | mainlib | C6H7NOS  | 141    |
| 3   | 4-(Chloromethyl)-5-methyl-1,3-thiazole | 668        | 36          | 0-00-0     | mainlib | C5H6ClNS | 147    |
| 4   | 5-Methylthiophen-3-ylamine             | 667        | 34          | 0-00-0     | mainlib | C5H7NS   | 113    |
| 5   | 2-Thiophenemethanamine                 | 662        | 27          | 27757-85-3 | mainlib | C5H7NS   | 113    |

# (R)-(+)-Citronellic acid

1st Dimension R.T. = 1015.19

2nd Dimension R.T. = 1.505

Quant Mass(es) = 69

S/N = 816.33

Area = 1334122

Height = 105735

Similarity = 834

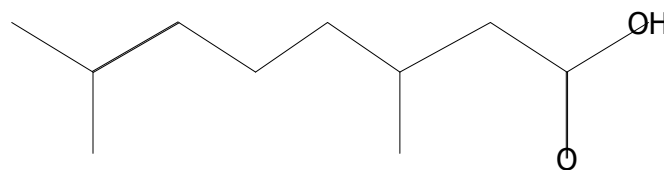

Peak Apex - sample "AnMbr C (20191120):1", peak 1854, at 1015.19 , 1.505 sec , sec (Spec # 81318)

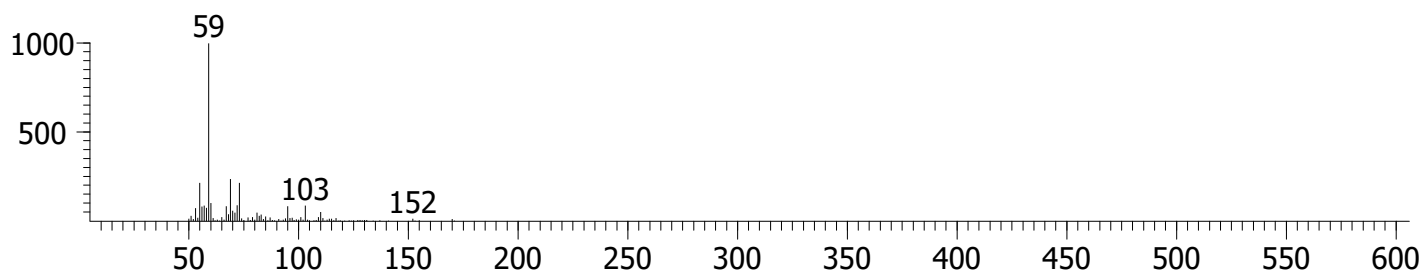

Peak True - sample "AnMbr C (20191120):1", peak 1854, at 1015.19 , 1.505 sec , sec (Spec # 81318)

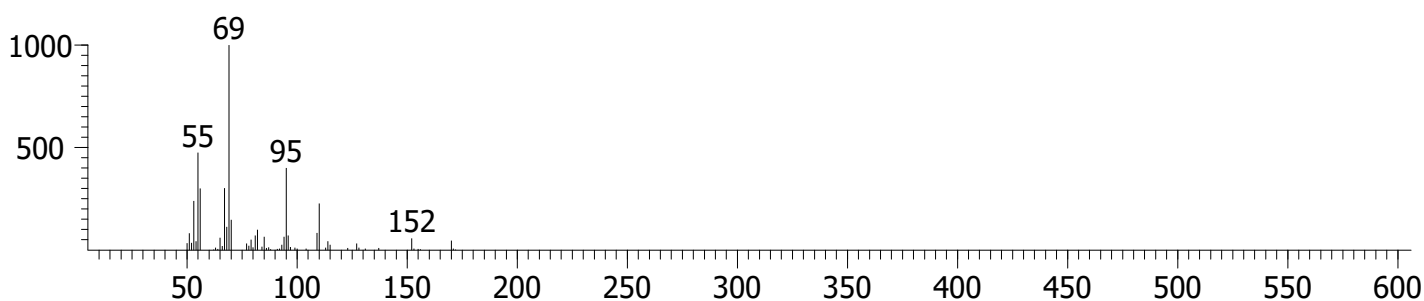

Library Hit - similarity 834, "(R)-(+)-Citronellic acid"

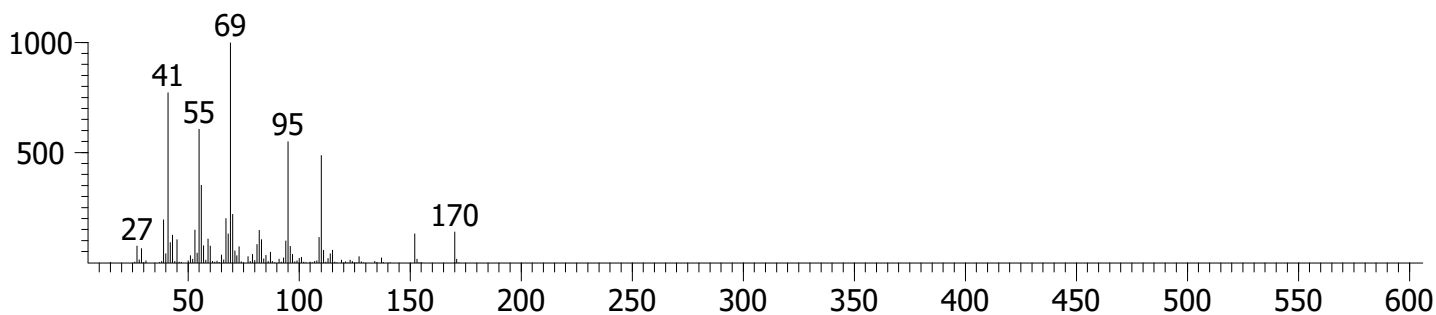

| Hit | Name                                         | Similarity | Probability | CAS        | Library | Formula  | Weight |
|-----|----------------------------------------------|------------|-------------|------------|---------|----------|--------|
| 1   | (R)-(+)-Citronellic acid                     | 834        | 3426        | 18951-85-4 | mainlib | C10H18O2 | 170    |
| 2   | 6-Octenoic acid, 3,7-dimethyl-               | 831        | 3027        | 502-47-6   | mainlib | C10H18O2 | 170    |
| 3   | 6-Octenoic acid, 3,7-dimethyl-, methyl ester | 752        | 345         | 2270-60-2  | mainlib | C11H20O2 | 184    |
| 4   | 1,5-Heptadiene, 2,3,6-trimethyl-             | 736        | 198         | 33501-88-1 | mainlib | C10H18   | 138    |
| 5   | 2-Octene, 2-methyl-6-methylene-              | 736        | 198         | 10054-09-8 | mainlib | C10H18   | 138    |

# Quinoline, 1,2,3,4-tetrahydro-2-methyl-

1st Dimension R.T. = 1088.65  
2nd Dimension R.T. = 1.927  
Quant Mass(es) = 132  
S/N = 1847.6  
Area = 224373  
Height = 26873  
Similarity = 795

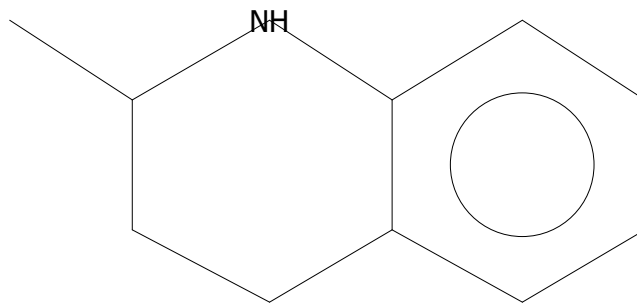

Peak Apex - sample "AnMbr C (20191120):1", peak 2249, at 1088.65 , 1.927 sec , sec (Spec # 92512)

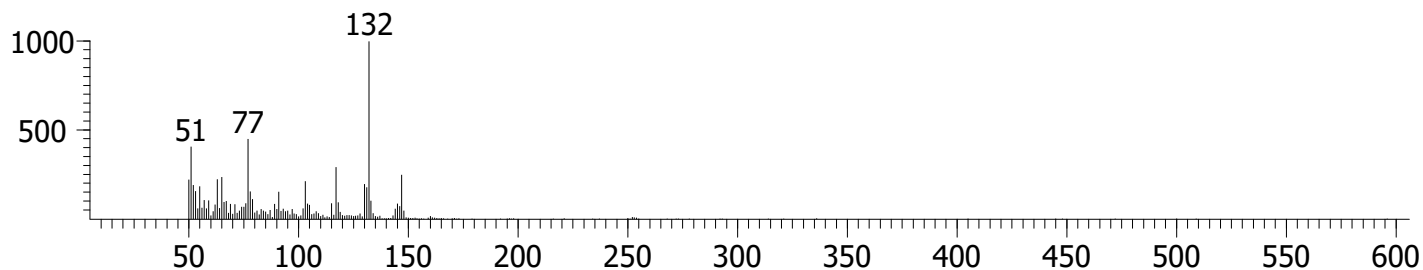

Peak True - sample "AnMbr C (20191120):1", peak 2249, at 1088.65 , 1.927 sec , sec (Spec # 92512)

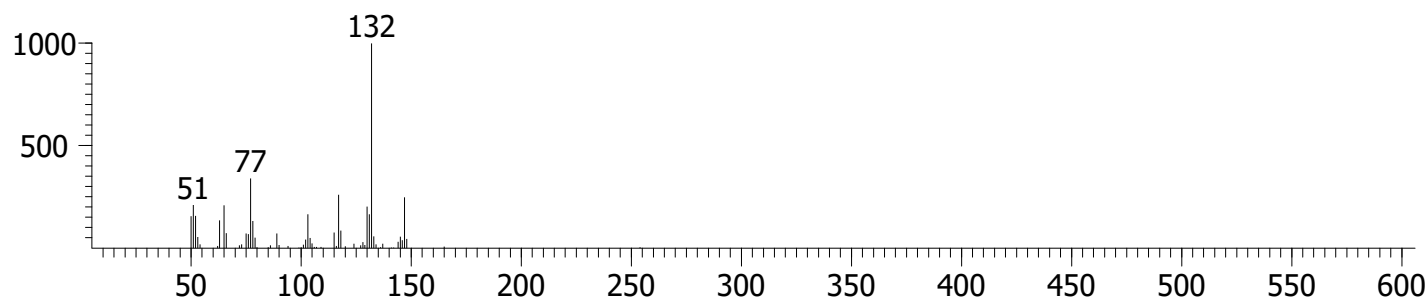

Library Hit - similarity 795, "Quinoline, 1,2,3,4-tetrahydro-2-methyl-"

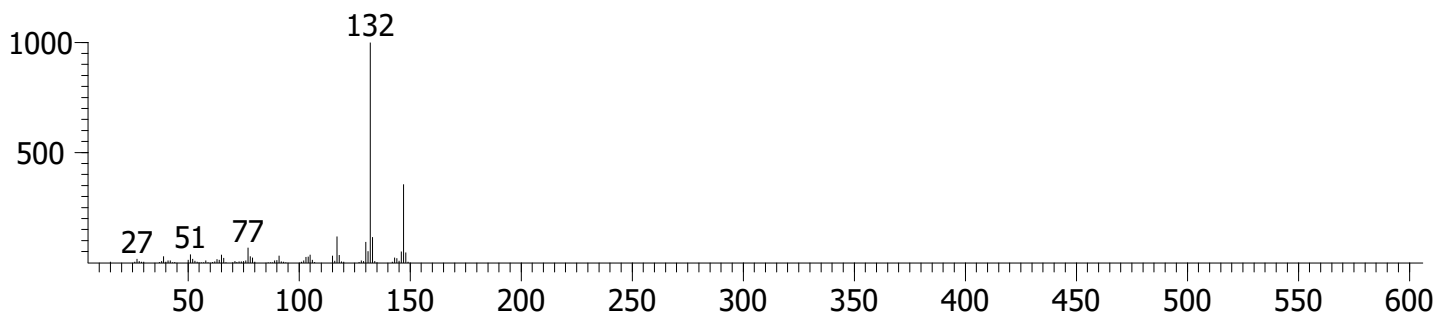

| Hit | Name                                                     | Similarity | Probability | CAS        | Library | Formula     | Weight |
|-----|----------------------------------------------------------|------------|-------------|------------|---------|-------------|--------|
| 1   | Quinoline, 1,2,3,4-tetrahydro-2-methyl-                  | 795        | 4340        | 1780-19-4  | mainlib | C10H13N     | 147    |
| 2   | Isoquinoline, 1,2,3,4-tetrahydro-1-methyl-               | 766        | 1230        | 4965-09-7  | mainlib | C10H13N     | 147    |
| 3   | 1H-Indole, 2,3-dihydro-1,2-dimethyl-                     | 747        | 597         | 26216-93-3 | mainlib | C10H13N     | 147    |
| 4   | 2-(1-Methylcyclopropyl)aniline                           | 731        | 344         | 71759-33-6 | mainlib | C10H13N     | 147    |
| 5   | Sulfone, (1,2,3,4-tetrahydroquinol-1-yl)(4-nitrophenyl)- | 730        | 330         | 0-00-0     | mainlib | C15H14N2O4S | 318    |

# Benzaldehyde, 4-propyl-

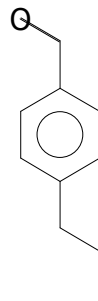

1st Dimension R.T. = 1239.07

2nd Dimension R.T. = 2.310

Quant Mass(es) = 119

S/N = 84.279

Area = 14563

Height = 1483.5

Similarity = 706

Peak Apex - sample "AnMbr C (20191120):1", peak 3109, at 1239.07 , 2.310 sec , sec (Spec # 115360)

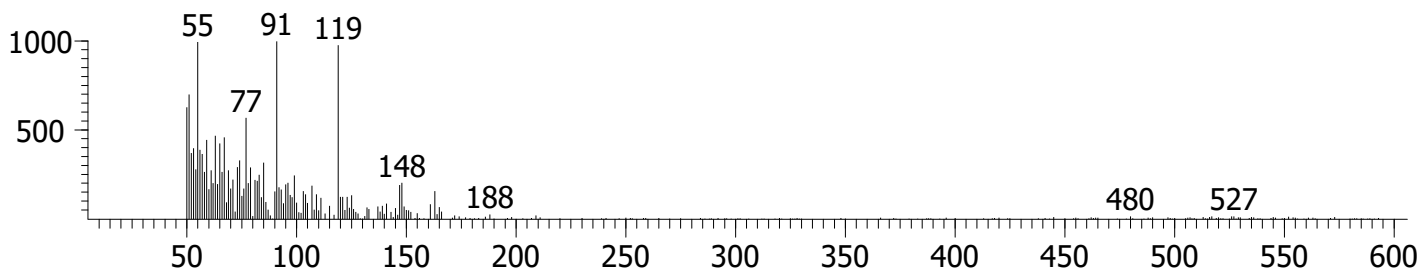

Peak True - sample "AnMbr C (20191120):1", peak 3109, at 1239.07 , 2.310 sec , sec (Spec # 115360)

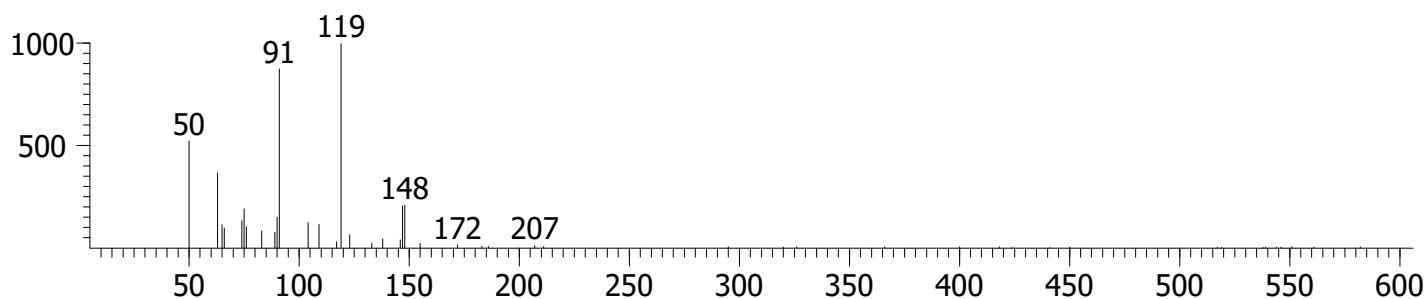

Library Hit - similarity 706, "Benzaldehyde, 4-propyl-"

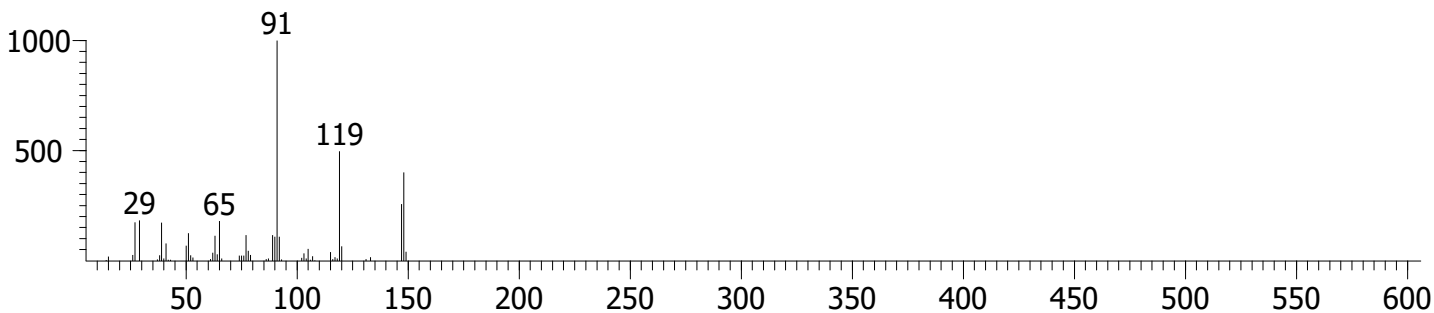

| Hit | Name                              | Similarity | Probability | CAS        | Library | Formula | Weight |
|-----|-----------------------------------|------------|-------------|------------|---------|---------|--------|
| 1   | Benzaldehyde, 4-propyl-           | 706        | 3888        | 28785-06-0 | mainlib | C10H12O | 148    |
| 2   | 1(3H)-Isobenzofuranone, 5-methyl- | 681        | 1185        | 54120-64-8 | mainlib | C9H8O2  | 148    |
| 3   | 4-Methylphthalaldehyde            | 668        | 766         | 15158-36-8 | mainlib | C9H8O2  | 148    |
| 4   | benz[d]isoxazole, 3-ethyl-        | 647        | 325         | 66033-77-0 | mainlib | C9H9NO  | 147    |
| 5   | Propiophenone, 2'-methyl-         | 636        | 223         | 2040-14-4  | mainlib | C10H12O | 148    |



## 5,6-Dimethyl-2-benzimidazolinone

1st Dimension R.T. = 1798.75  
2nd Dimension R.T. = 2.660  
Quant Mass(es) = 162  
S/N = 304.06  
Area = 233498  
Height = 19304  
Similarity = 908

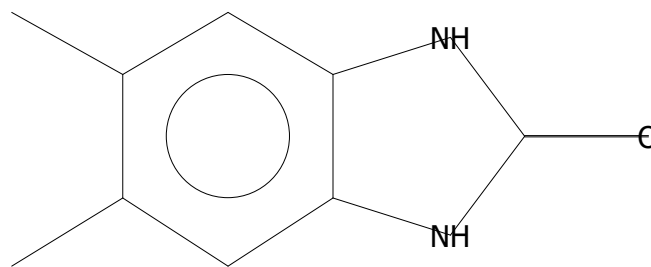

Peak Apex - sample "AnMbr C (20191120):1", peak 6214, at 1798.75 , 2.660 sec , sec (Spec # 200213)

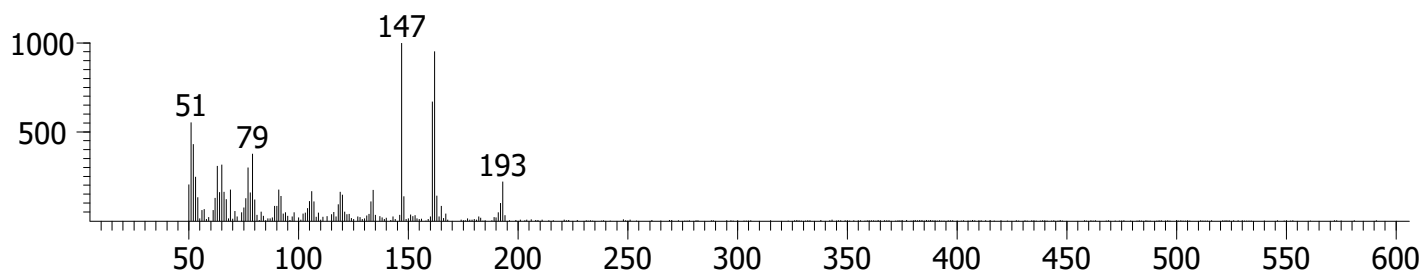

Peak True - sample "AnMbr C (20191120):1", peak 6214, at 1798.75 , 2.660 sec , sec (Spec # 200213)

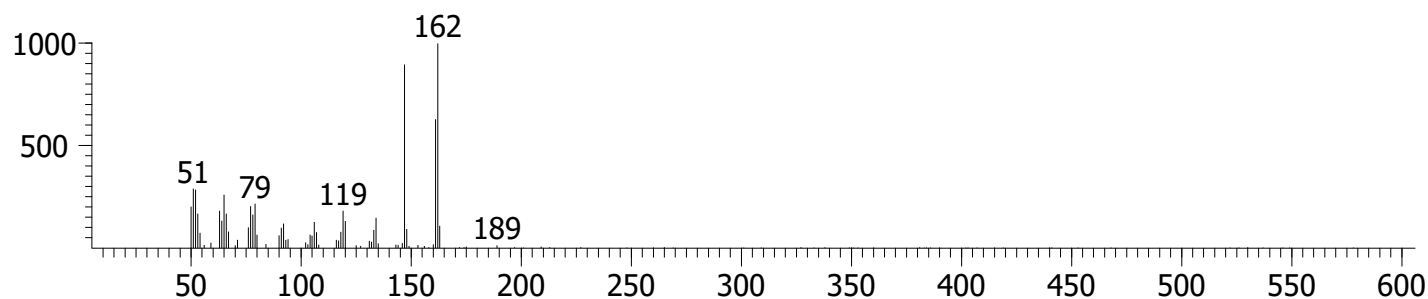

Library Hit - similarity 908, "5,6-Dimethyl-2-benzimidazolinone"

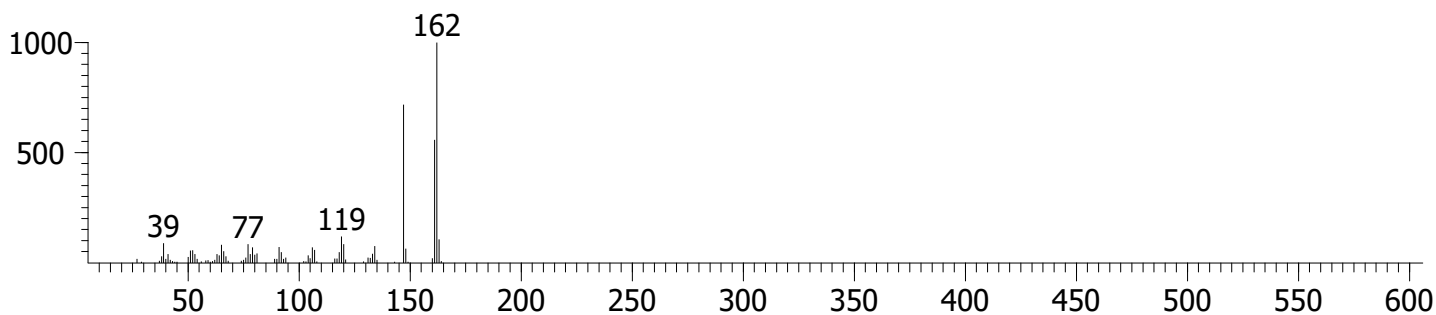

| Hit | Name                                         | Similarity | Probability | CAS        | Library | Formula  | Weight |
|-----|----------------------------------------------|------------|-------------|------------|---------|----------|--------|
| 1   | 5,6-Dimethyl-2-benzimidazolinone             | 908        | 8184        | 2033-30-9  | mainlib | C9H10N2O | 162    |
| 2   | 3-(1-Methylethyl)(1H)pyrazolo[3,4-b]pyrazine | 774        | 316         | 0-00-0     | mainlib | C8H10N4  | 162    |
| 3   | Pyrazine, trimethyl-1-propenyl-, (E)-        | 769        | 255         | 55138-79-9 | mainlib | C10H14N2 | 162    |
| 4   | Pyrazine, trimethyl-1-propenyl-, (Z)-        | 753        | 147         | 55138-75-5 | mainlib | C10H14N2 | 162    |
| 5   | 5-Hydroxy-3-methyl-1-indanone                | 753        | 147         | 57878-30-5 | mainlib | C10H10O2 | 162    |

## 4-Hepten-3-one, 4-methyl-

1st Dimension R.T. = 829.8  
2nd Dimension R.T. = 2.013  
Quant Mass(es) = 97  
S/N = 174.87  
Area = 52435  
Height = 6411.6  
Similarity = 828

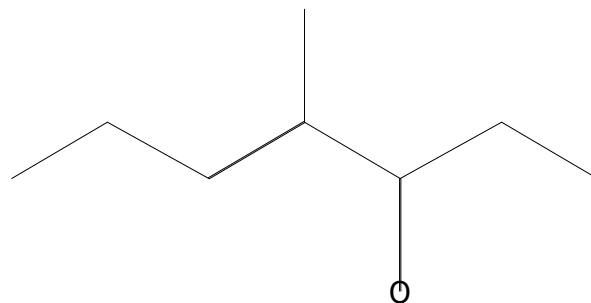

Peak Apex - sample "AnBxr B (20191121):1", peak 1155, at 829.8 , 2.013 sec , sec (Spec # 53305)

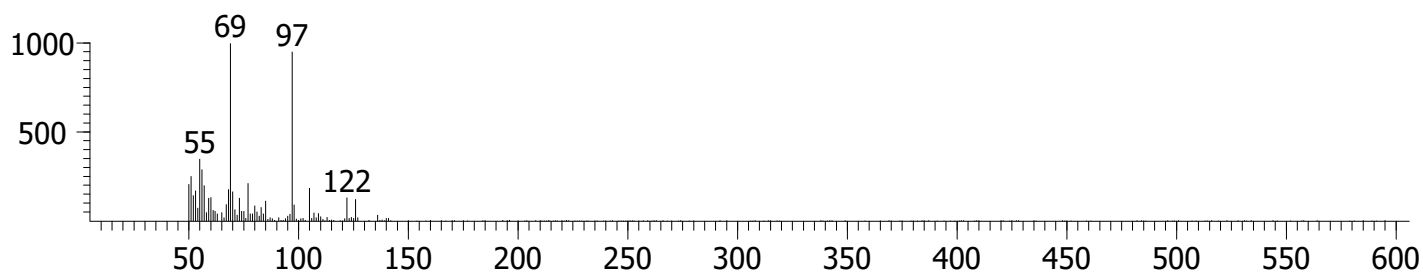

Peak True - sample "AnBxr B (20191121):1", peak 1155, at 829.8 , 2.013 sec , sec (Spec # 53305)

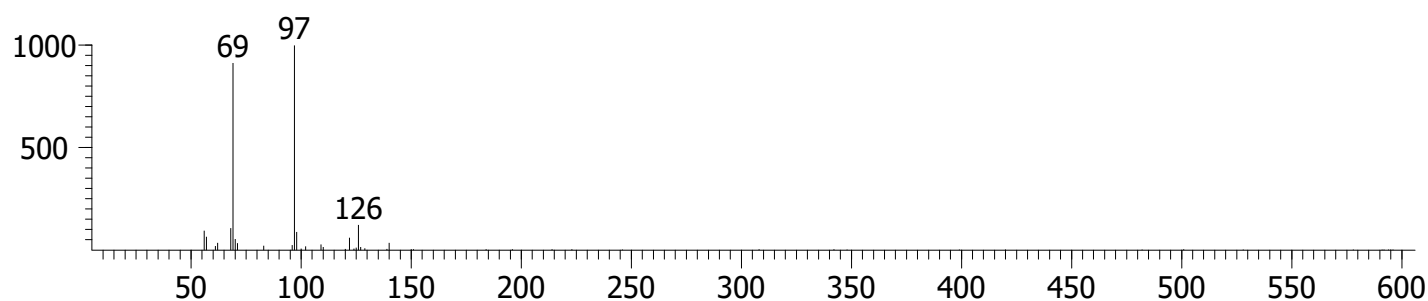

Library Hit - similarity 828, "4-Hepten-3-one, 4-methyl-"

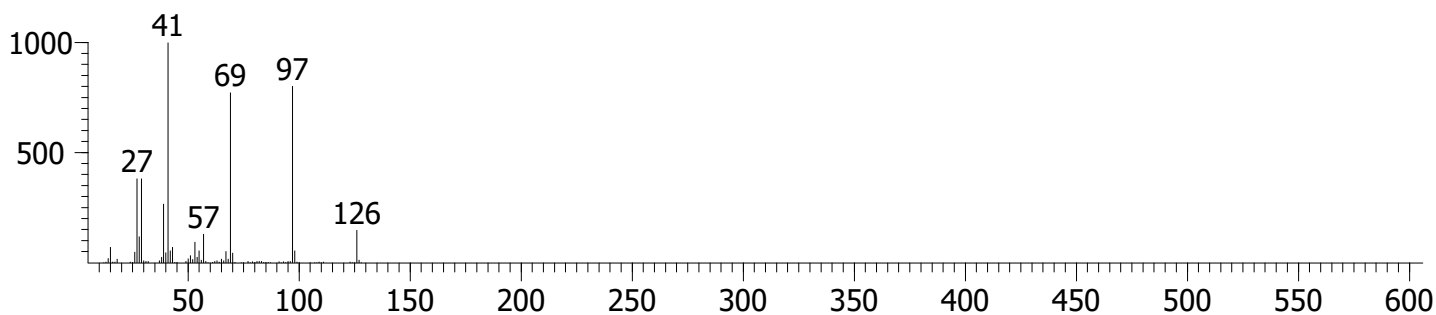

| Hit | Name                                        | Similarity | Probability | CAS         | Library   | Formula                                          | Weight |
|-----|---------------------------------------------|------------|-------------|-------------|-----------|--------------------------------------------------|--------|
| 1   | 4-Hepten-3-one, 4-methyl-                   | 828        | 5111        | 22319-31-9  | mainlib   | C <sub>8</sub> H <sub>14</sub> O                 | 126    |
| 2   | 1-(Cyclopentylcarbonyl)-4-piperidinamine    | 827        | 5700        | 926234-06-2 | nist_msms | C <sub>11</sub> H <sub>20</sub> N <sub>2</sub> O | 196    |
| 3   | 4-Hexen-3-one, 4,5-dimethyl-                | 803        | 1558        | 17325-90-5  | mainlib   | C <sub>8</sub> H <sub>14</sub> O                 | 126    |
| 4   | 1-(Cyclopentylcarbonyl)-4-piperidinamine    | 796        | 5700        | 926234-06-2 | nist_msms | C <sub>11</sub> H <sub>20</sub> N <sub>2</sub> O | 196    |
| 5   | 1H-Pyrazole, 4,5-dihydro-3-methyl-1-propyl- | 793        | 1100        | 26964-49-8  | mainlib   | C <sub>7</sub> H <sub>14</sub> N <sub>2</sub>    | 126    |

Carbonic acid, monoamide, N-butyl-, allyl ester

1st Dimension R.T. = 871.776

2nd Dimension R.T. = 1.617

Quant Mass(es) = 114

S/N = 926.29

Area = 147105

Height = 19408

Similarity = 809

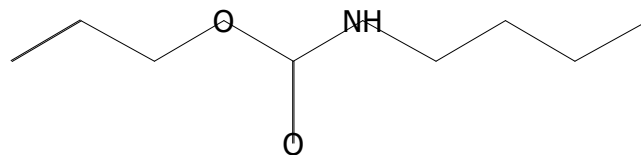

Peak Apex - sample "AnBxr B (20191121):1", peak 1327, at 871.776 , 1.617 sec , sec (Spec # 59605)

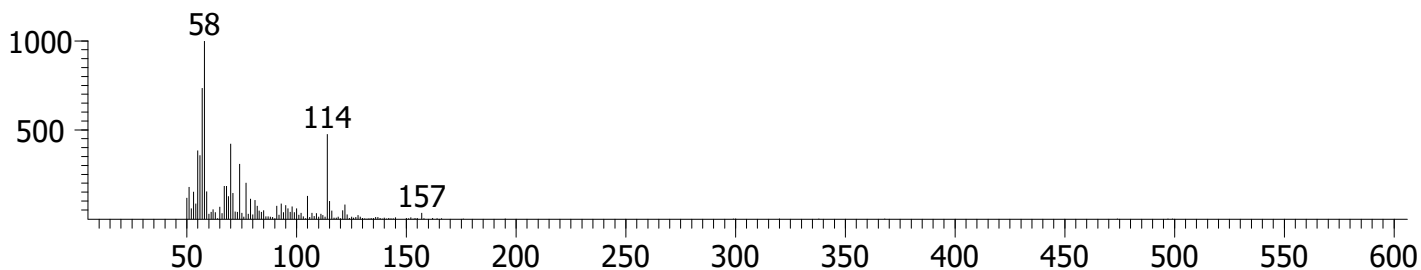

Peak True - sample "AnBxr B (20191121):1", peak 1327, at 871.776 , 1.617 sec , sec (Spec # 59605)

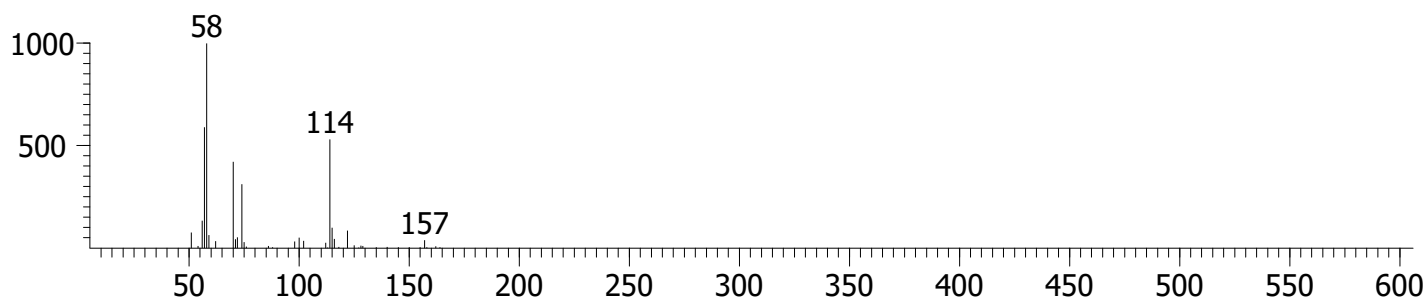

Library Hit - similarity 809, "Carbonic acid, monoamide, N-butyl-, allyl ester"

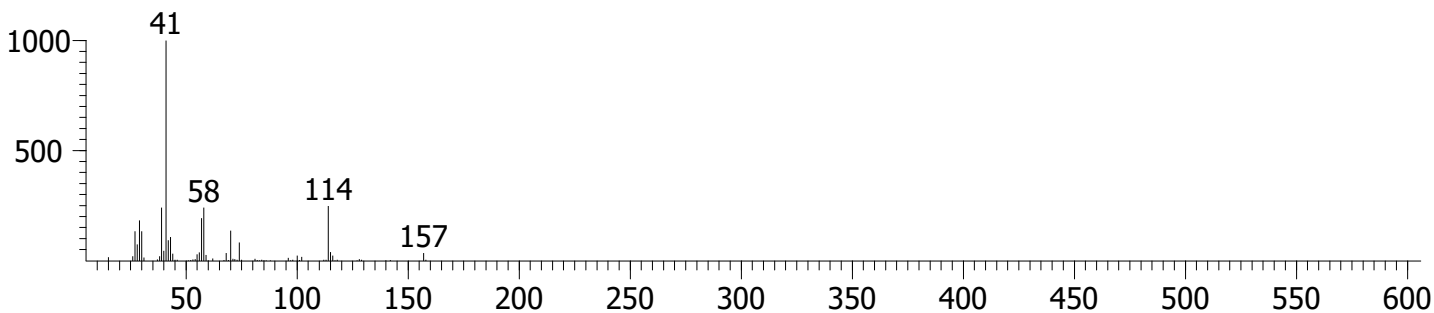

| Hit | Name                                               | Similarity | Probability | CAS    | Library | Formula   | Weight |
|-----|----------------------------------------------------|------------|-------------|--------|---------|-----------|--------|
| 1   | Carbonic acid, monoamide, N-butyl-, allyl ester    | 809        | 3991        | 0-00-0 | mainlib | C8H15NO2  | 157    |
| 2   | Carbonic acid, monoamide, N-heptyl-, allyl ester   | 809        | 3991        | 0-00-0 | mainlib | C11H21NO2 | 199    |
| 3   | Carbonic acid, monoamide, N-isobutyl-, allyl ester | 754        | 774         | 0-00-0 | mainlib | C8H15NO2  | 157    |
| 4   | Carbonic acid, monoamide, N-hexyl-, allyl ester    | 739        | 469         | 0-00-0 | mainlib | C10H19NO2 | 185    |
| 5   | Carbonic acid, monoamide, N-octyl-, allyl ester    | 717        | 185         | 0-00-0 | mainlib | C12H23NO2 | 213    |

## 2,2-Dimethyl-N-phenethylpropionamide

1st Dimension R.T. = 1518.91  
2nd Dimension R.T. = 2.033  
Quant Mass(es) = 104  
S/N = 4070.0  
Area = 826728  
Height = 71963  
Similarity = 828

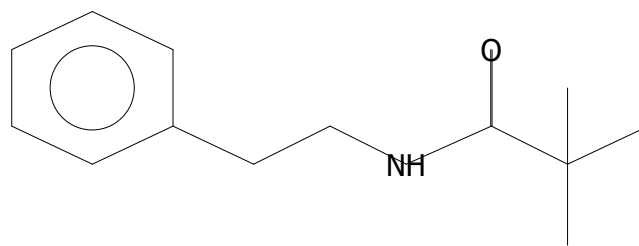

Peak Apex - sample "AnBxr B (20191121):1", peak 5280, at 1518.91 , 2.033 sec , sec (Spec # 157718)

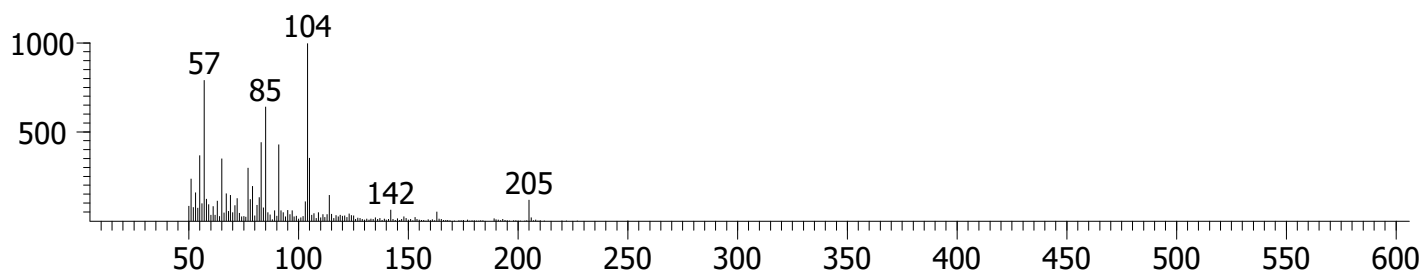

Peak True - sample "AnBxr B (20191121):1", peak 5280, at 1518.91 , 2.033 sec , sec (Spec # 157718)

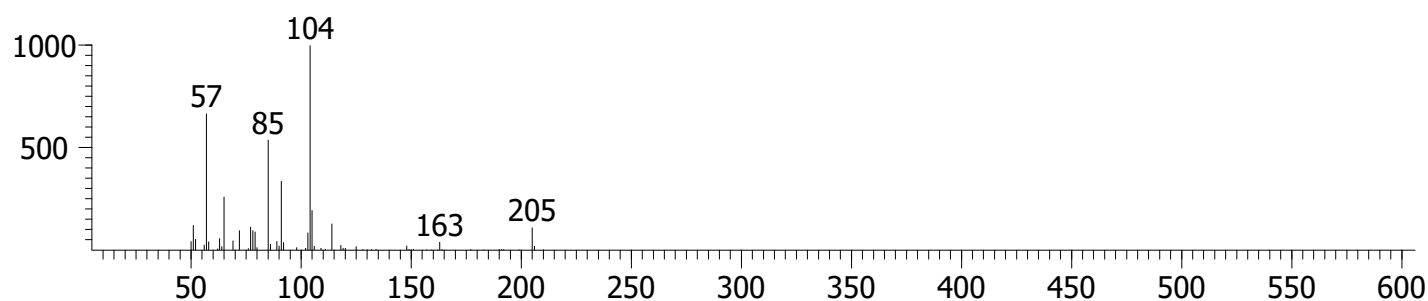

Library Hit - similarity 828, "2,2-Dimethyl-N-phenethylpropionamide"

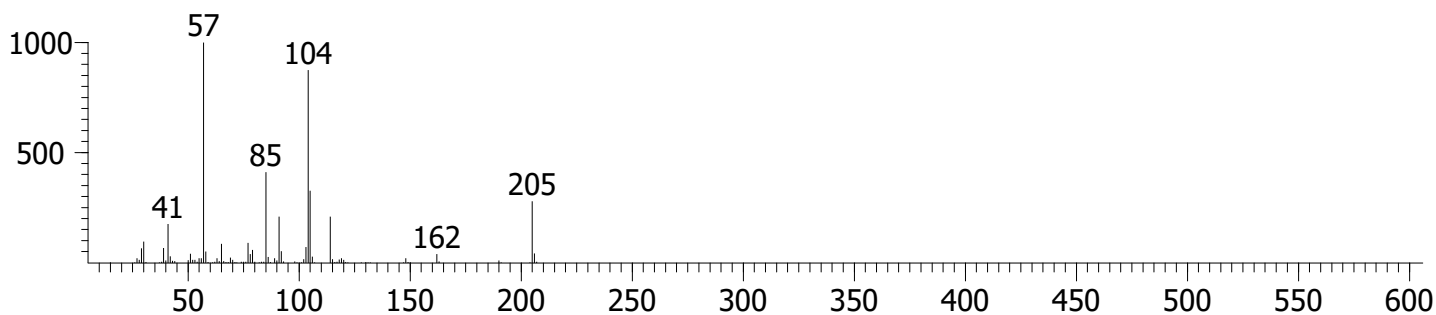

| Hit | Name                                          | Similarity | Probability | CAS        | Library | Formula  | Weight |
|-----|-----------------------------------------------|------------|-------------|------------|---------|----------|--------|
| 1   | 2,2-Dimethyl-N-phenethylpropionamide          | 828        | 6348        | 62056-54-6 | replib  | C13H19NO | 205    |
| 2   | Butanoic acid, 3-methyl-, 2-phenylethyl ester | 794        | 1627        | 140-26-1   | replib  | C13H18O2 | 206    |
| 3   | Pentanoic acid, 2-phenylethyl ester           | 783        | 1116        | 7460-74-4  | replib  | C13H18O2 | 206    |
| 4   | 2,2-Dimethyl-N-phenethylpropionamide          | 777        | 2962        | 62056-54-6 | mainlib | C13H19NO | 205    |
| 5   | Butanoic acid, 3-methyl-, 2-phenylethyl ester | 763        | 1854        | 140-26-1   | mainlib | C13H18O2 | 206    |

5-(Thiophen-2-yl)-1,2-oxazole-3-carboxylic acid

1st Dimension R.T. = 1564.38  
 2nd Dimension R.T. = 2.455  
 Quant Mass(es) = 111  
 S/N = 1461.7  
 Area = 413393  
 Height = 31807  
 Similarity = 710

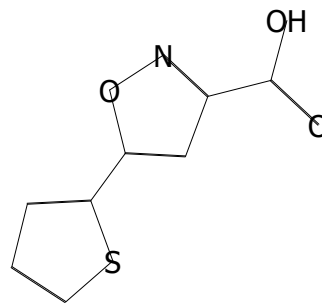

Peak Apex - sample "AnBxr B (20191121):1", peak 5609, at 1564.38 , 2.455 sec , sec (Spec # 164672)

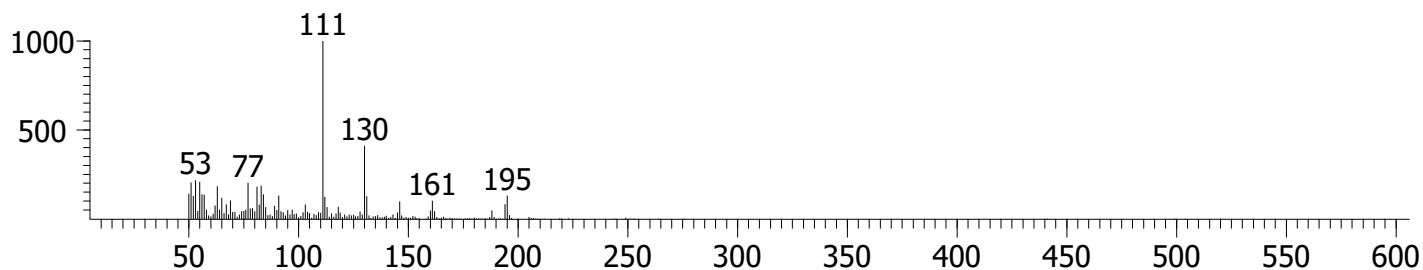

Peak True - sample "AnBxr B (20191121):1", peak 5609, at 1564.38 , 2.455 sec , sec (Spec # 164672)

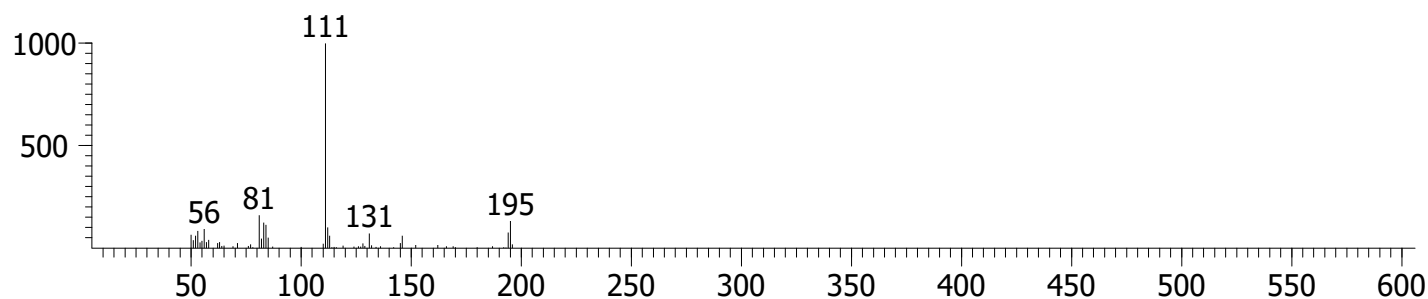

Library Hit - similarity 710, "5-(Thiophen-2-yl)-1,2-oxazole-3-carboxylic acid"

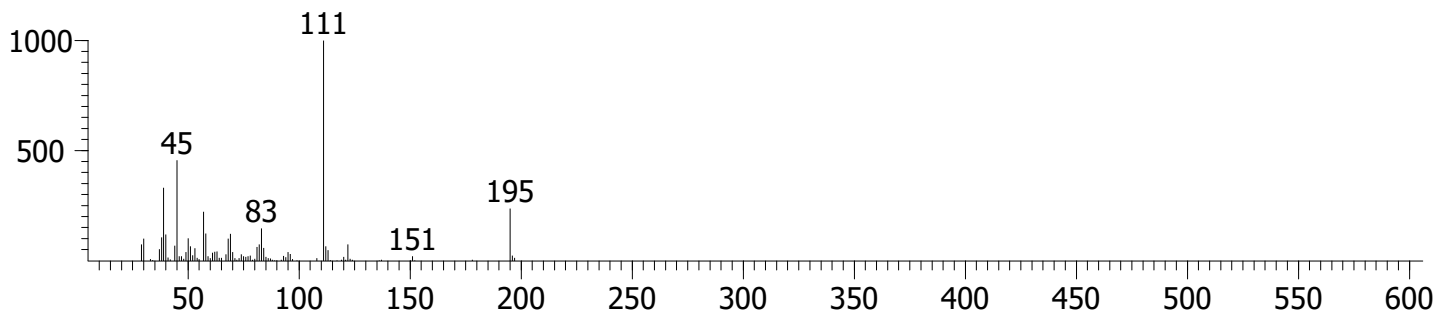

| Hit | Name                                                     | Similarity | Probability | CAS       | Library   | Formula    | Weight |
|-----|----------------------------------------------------------|------------|-------------|-----------|-----------|------------|--------|
| 1   | 5-(Thiophen-2-yl)-1,2-oxazole-3-carboxylic acid          | 710        | 2178        | 0-00-0    | mainlib   | C8H5NO3S   | 195    |
| 2   | 4-Amino-6-hydroxypyrimidine                              | 695        | 6021        | 1193-22-2 | replib    | C4H5N3O    | 111    |
| 3   | 5-(Thiophen-3-yl)-1,2-oxazole-3-carboxylic acid          | 692        | 1123        | 0-00-0    | mainlib   | C8H5NO3S   | 195    |
| 4   | 2-Thiophenecarboxylic acid, 3-fluoro-6-nitrophenyl ester | 680        | 748         | 0-00-0    | mainlib   | C11H6FNO4S | 267    |
| 5   | Dimetilan                                                | 669        | 4069        | 644-64-4  | nist_msms | C10H16N4O3 | 240    |

4H-1-Benzopyran-4-one,  
6-hydroxy-2-methyl-

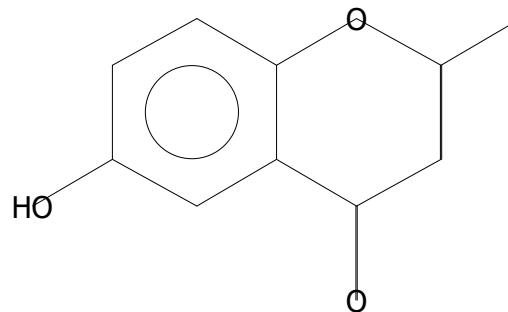

1st Dimension R.T. = 1581.87

2nd Dimension R.T. = 2.501

Quant Mass(es) = 136

S/N = 206.48

Area = 30641

Height = 2721.9

Similarity = 677

Peak Apex - sample "AnBxr B (20191121):1", peak 5720, at 1581.87 , 2.501 sec , sec (Spec # 167329)

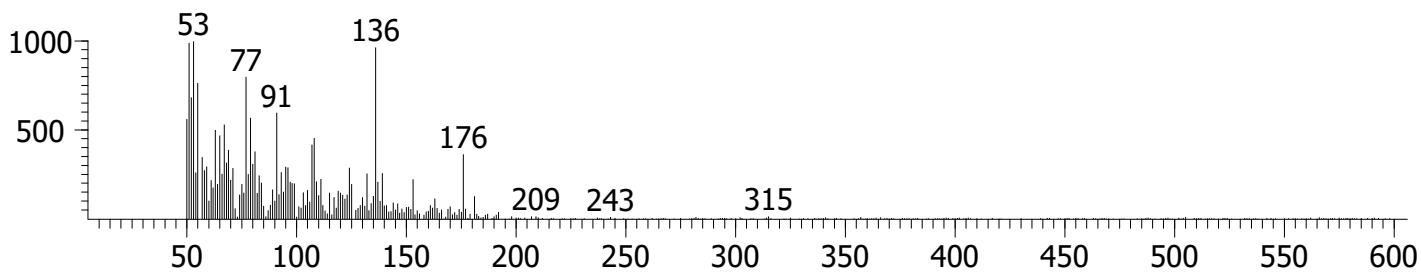

Peak True - sample "AnBxr B (20191121):1", peak 5720, at 1581.87 , 2.501 sec , sec (Spec # 167329)

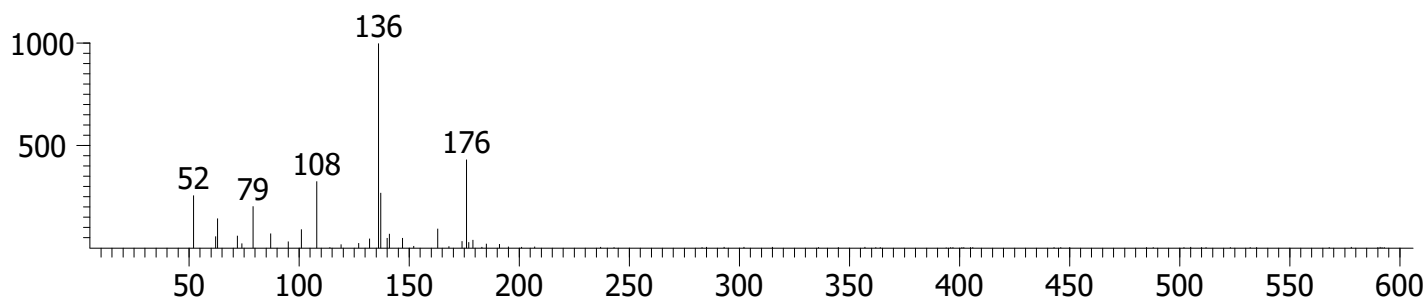

Library Hit - similarity 677, "4H-1-Benzopyran-4-one, 6-hydroxy-2-methyl-"

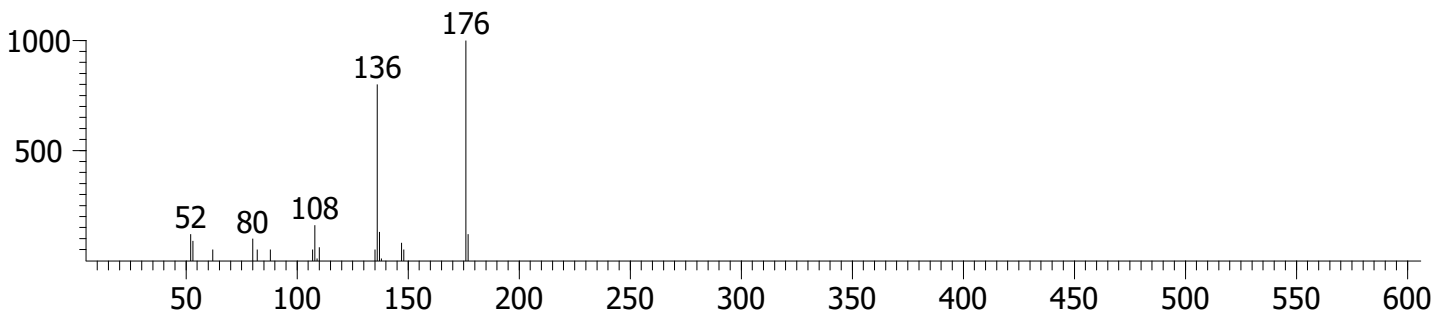

| Hit | Name                                                                         | Similarity | Probability | CAS         | Library   | Formula    | Weight |
|-----|------------------------------------------------------------------------------|------------|-------------|-------------|-----------|------------|--------|
| 1   | 4H-1-Benzopyran-4-one, 6-hydroxy-2-methyl-                                   | 677        | 5249        | 22105-12-0  | mainlib   | C10H8O3    | 176    |
| 2   | Ethylvanillin                                                                | 619        | 2705        | 121-32-4    | nist_msms | C9H10O3    | 166    |
| 3   | Benzofuroxan                                                                 | 617        | 5077        | 480-96-6    | replib    | C6H4N2O2   | 136    |
| 4   | 3-Hydroxyanthranilic acid                                                    | 612        | 2072        | 548-93-6    | nist_msms | C7H7NO3    | 153    |
| 5   | Benzoic acid, 2-hydroxy-4-[[2-[[[(4-methylphenyl)sulfonyl]oxy]acetyl]amino]- | 606        | 1628        | 501919-59-1 | nist_msms | C16H15NO7S | 365    |

## 2-(2-Oxo-2H-pyridin-1-yl)benzoic acid

1st Dimension R.T. = 1889.69  
2nd Dimension R.T. = 2.376  
Quant Mass(es) = 170  
S/N = 221.22  
Area = 31840  
Height = 2893.3  
Similarity = 643

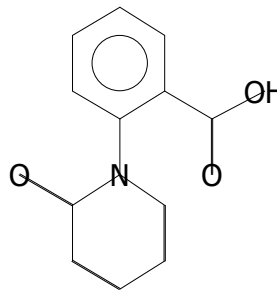

Peak Apex - sample "AnBxr B (20191121):1", peak 7407, at 1889.69 , 2.376 sec , sec (Spec # 213950)

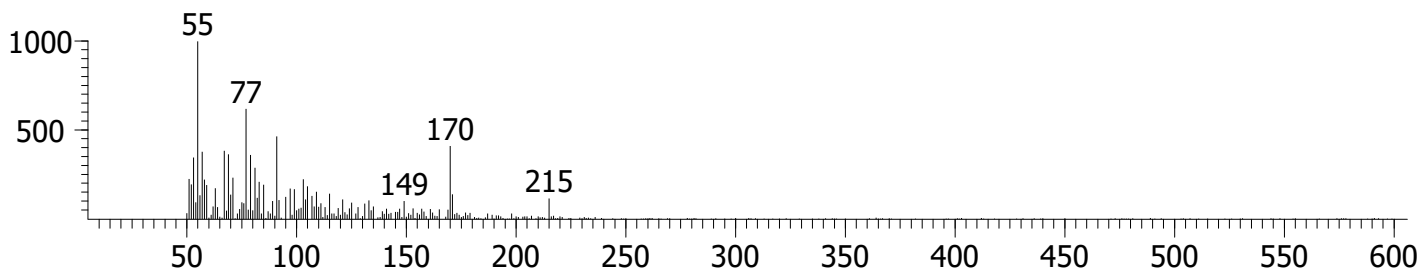

Peak True - sample "AnBxr B (20191121):1", peak 7407, at 1889.69 , 2.376 sec , sec (Spec # 213950)

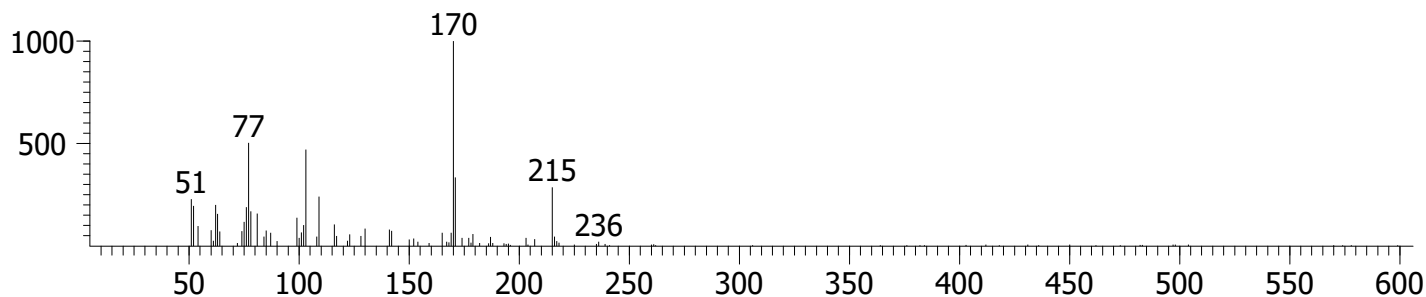

Library Hit - similarity 643, "2-(2-Oxo-2H-pyridin-1-yl)benzoic acid"

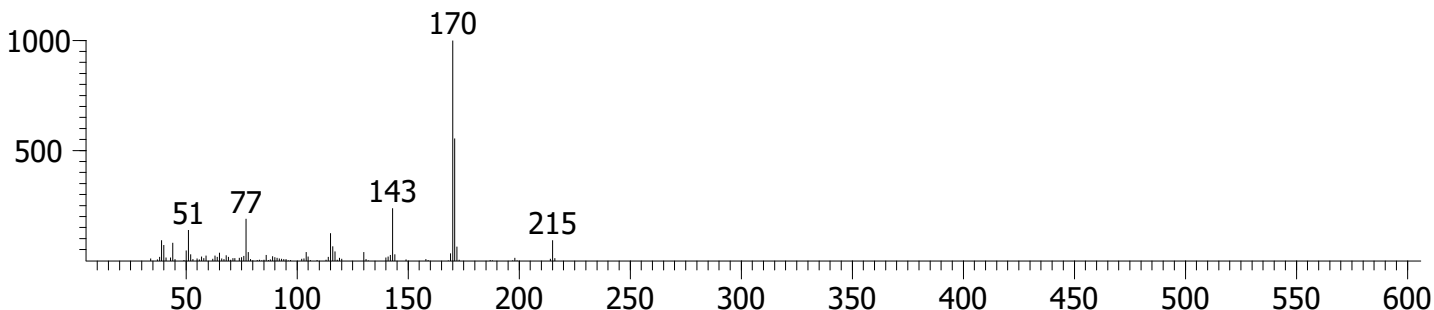

| Hit | Name                                                               | Similarity | Probability | CAS    | Library | Formula    | Weight |
|-----|--------------------------------------------------------------------|------------|-------------|--------|---------|------------|--------|
| 1   | 2-(2-Oxo-2H-pyridin-1-yl)benzoic acid                              | 643        | 4204        | 0-00-0 | mainlib | C12H9NO3   | 215    |
| 2   | N-Methyl-2-(2-oxo-2H-pyridin-1-yl)benzamide                        | 624        | 2041        | 0-00-0 | mainlib | C13H12N2O2 | 228    |
| 3   | 2-{5-Methyl-7-nitro-2-phenylimidazo[1,5-a][1,3]diazol-1-yl}ethanol | 589        | 512         | 0-00-0 | mainlib | C14H14N4O3 | 286    |
| 4   | 8aH-pyrazolo[1,5-a]benzimidazole, 2-methyl-                        | 581        | 382         | 0-00-0 | mainlib | C10H9N3    | 171    |
| 5   | 1-(2-Acetylphenyl)-1H-pyridin-2-one                                | 572        | 277         | 0-00-0 | mainlib | C13H11NO2  | 213    |

# L-Cysteine, S-(diphenylmethyl)-

1st Dimension R.T. = 2124.06  
2nd Dimension R.T. = 3.010  
Quant Mass(es) = 167  
S/N = 181.32  
Area = 34255  
Height = 2527.8  
Similarity = 788

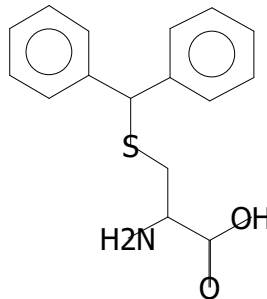

Peak Apex - sample "AnBxr B (20191121):1", peak 8184, at 2124.06 , 3.010 sec , sec (Spec # 249556)

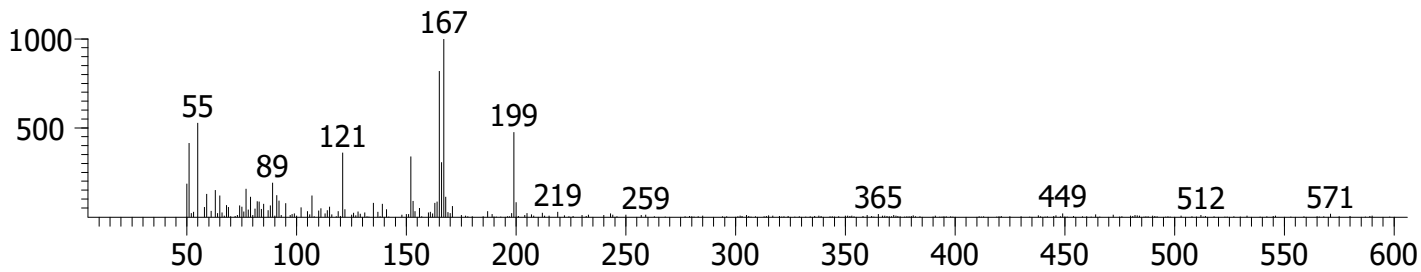

Peak True - sample "AnBxr B (20191121):1", peak 8184, at 2124.06 , 3.010 sec , sec (Spec # 249556)

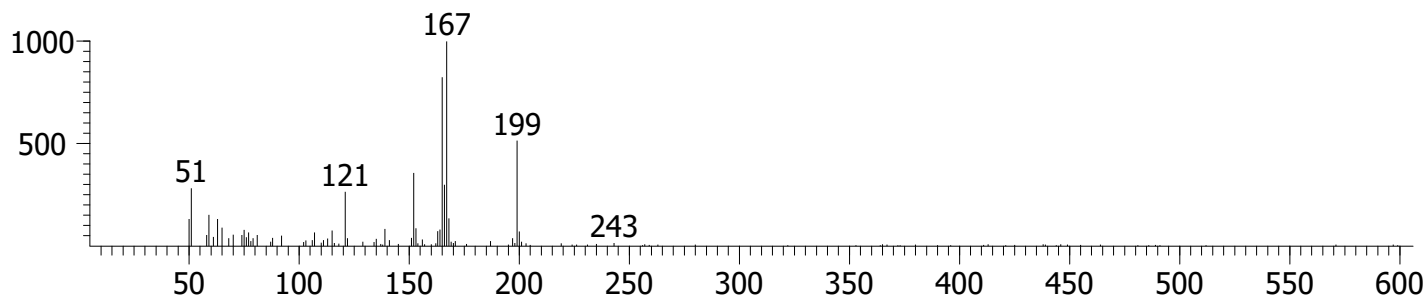

Library Hit - similarity 788, "L-Cysteine, S-(diphenylmethyl)-"

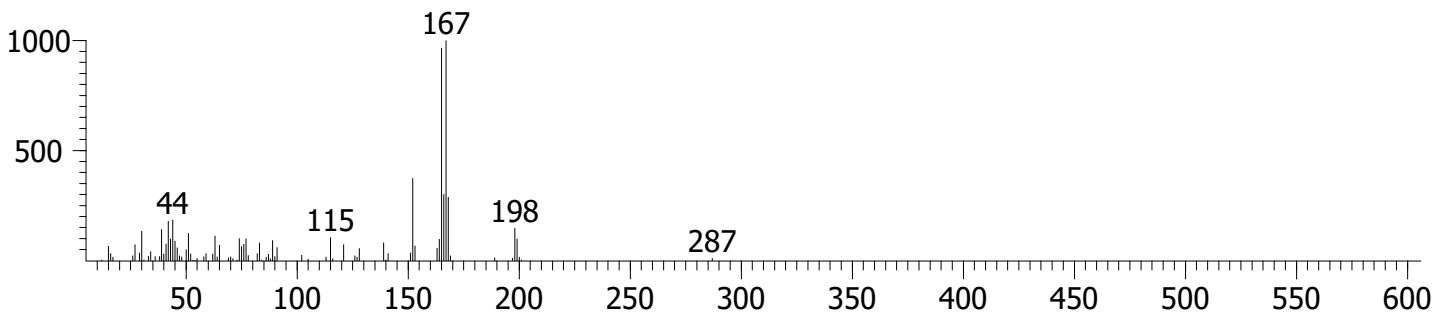

| Hit | Name                                                 | Similarity | Probability | CAS       | Library | Formula    | Weight |
|-----|------------------------------------------------------|------------|-------------|-----------|---------|------------|--------|
| 1   | L-Cysteine, S-(diphenylmethyl)-                      | 788        | 1698        | 5191-80-0 | mainlib | C16H17NO2S | 287    |
| 2   | 1,1'-[[[(2-bromoethyl)sulfanyl]methanediyl]dibenzene | 780        | 1267        | 0-00-0    | mainlib | C15H15BrS  | 306    |
| 3   | Benzene, 1,1'-(bromomethylene)bis-                   | 779        | 1946        | 776-74-9  | replib  | C13H11Br   | 246    |
| 4   | 2,2-Diphenylethylamine                               | 771        | 1452        | 3963-62-0 | replib  | C14H15N    | 197    |
| 5   | Benzene, 1,1'-(bromomethylene)bis-                   | 770        | 1946        | 776-74-9  | replib  | C13H11Br   | 246    |



# 4,8,12,16-tetraoxaeicosan-1-ol

1st Dimension R.T. = 2288.47

2nd Dimension R.T. = 1.610

Quant Mass(es) = 59

S/N = 184.38

Area = 317655

Height = 21693

Similarity = 919

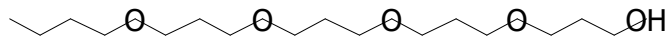

Peak Apex - sample "AnMbr C (20191120):1", peak 7302, at 2288.47 , 1.610 sec , sec (Spec # 274254)

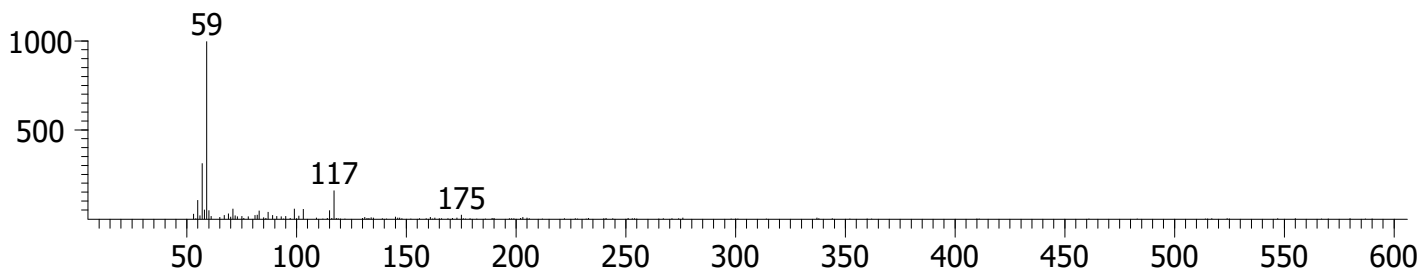

Peak True - sample "AnMbr C (20191120):1", peak 7302, at 2288.47 , 1.610 sec , sec (Spec # 274254)

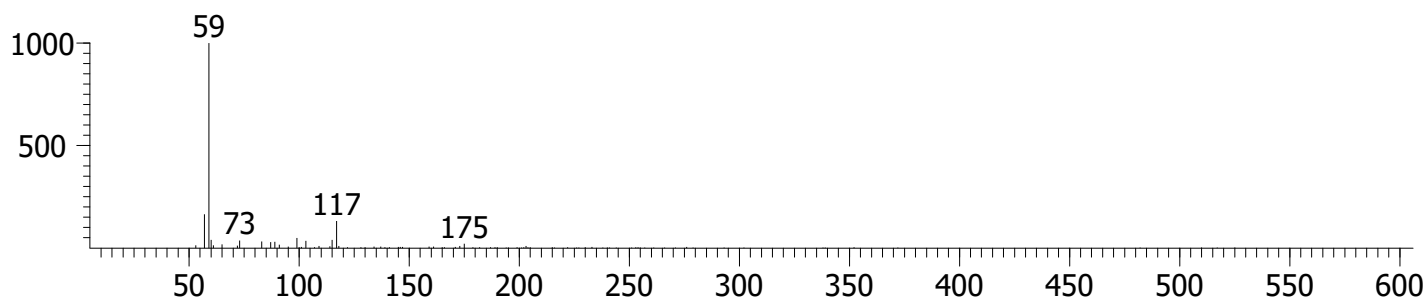

Library Hit - similarity 919, "4,8,12,16-tetraoxaeicosan-1-ol"

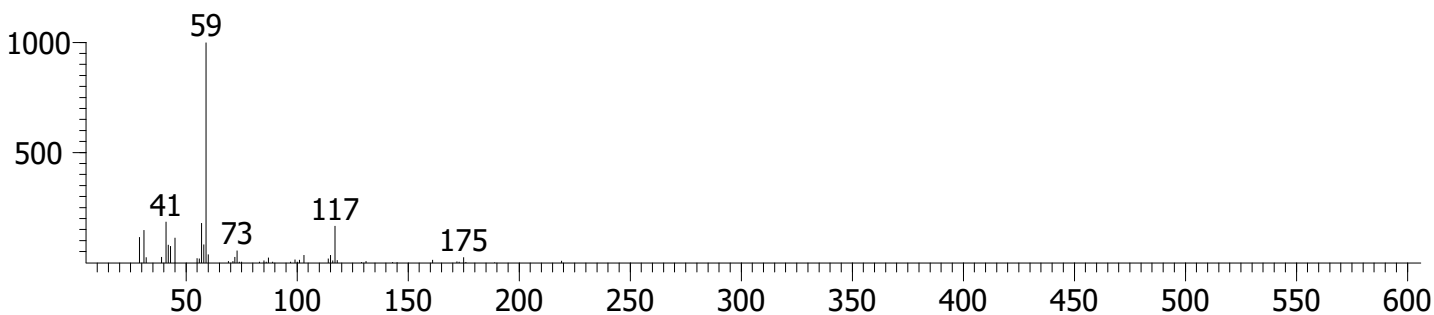

| Hit | Name                                             | Similarity | Probability | CAS        | Library | Formula  | Weight |
|-----|--------------------------------------------------|------------|-------------|------------|---------|----------|--------|
| 1   | 4,8,12,16-tetraoxaeicosan-1-ol                   | 919        | 5965        | 0-00-0     | mainlib | C16H34O5 | 306    |
| 2   | s-Trioxane, 2,4,6-triethyl-                      | 872        | 1247        | 2396-42-1  | mainlib | C9H18O3  | 174    |
| 3   | 2-Butanol                                        | 871        | 1199        | 78-92-2    | mainlib | C4H10O   | 74     |
| 4   | 3-Methyl-oxirane-2-carboxylic acid, methyl ester | 856        | 726         | 0-00-0     | mainlib | C5H8O3   | 116    |
| 5   | Propanol, [(butoxymethylethoxy)methylethoxy]-    | 831        | 221         | 55934-93-5 | mainlib | C13H28O4 | 248    |

## Pentadecanoic acid

1st Dimension R.T. = 1609.85

2nd Dimension R.T. = 1.426

Quant Mass(es) = 60

S/N = 649.02

Area = 244157

Height = 27378

Similarity = 878

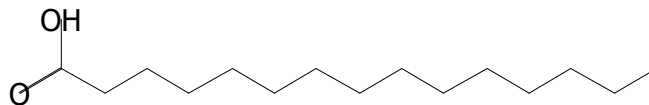

Peak Apex - sample "AnMbr C (20191120):1", peak 5229, at 1609.85 , 1.426 sec , sec (Spec # 171406)

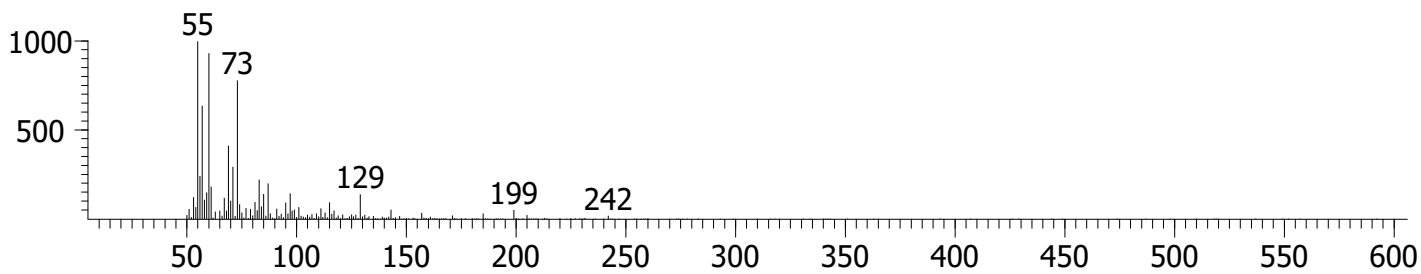

Peak True - sample "AnMbr C (20191120):1", peak 5229, at 1609.85 , 1.426 sec , sec (Spec # 171406)

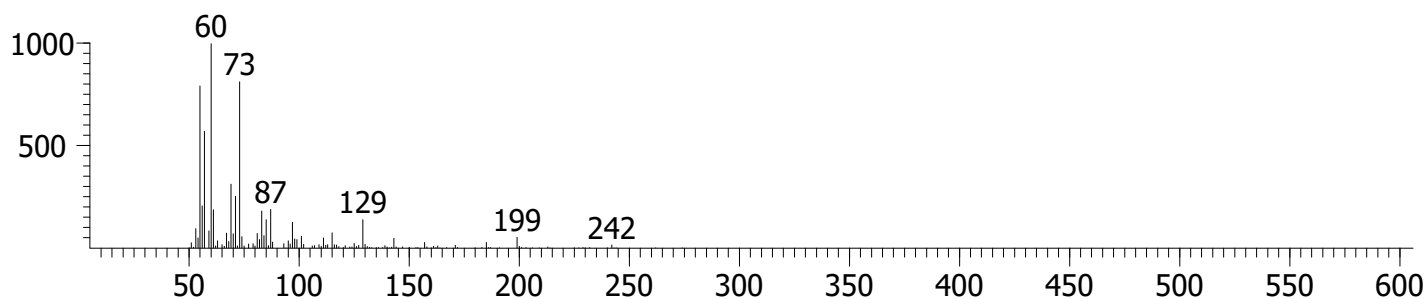

Library Hit - similarity 878, "Pentadecanoic acid"

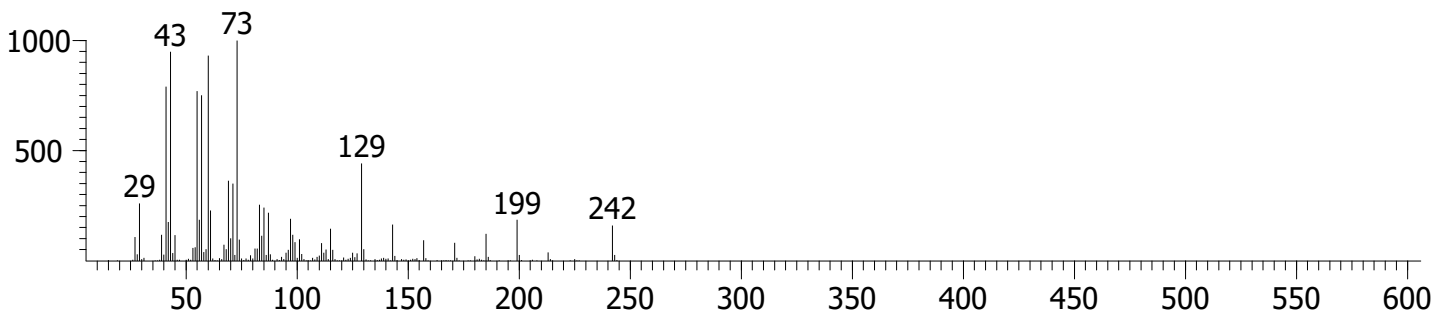

| Hit | Name                  | Similarity | Probability | CAS       | Library | Formula  | Weight |
|-----|-----------------------|------------|-------------|-----------|---------|----------|--------|
| 1   | Pentadecanoic acid    | 878        | 5245        | 1002-84-2 | mainlib | C15H30O2 | 242    |
| 2   | Tetradecanoic acid    | 831        | 1097        | 544-63-8  | mainlib | C14H28O2 | 228    |
| 3   | n-Hexadecanoic acid   | 824        | 840         | 57-10-3   | mainlib | C16H32O2 | 256    |
| 4   | 8-Methylnonanoic acid | 816        | 627         | 5963-14-4 | mainlib | C10H20O2 | 172    |
| 5   | Dodecanoic acid       | 803        | 405         | 143-07-7  | mainlib | C12H24O2 | 200    |
